# Supplementary material for: Phenotypic, histological and proteomic analyses reveal multiple differences associated with chloroplast development in yellow and variegated variants from Camellia sinensis
Source: PubMed Central journal article supplement (PMC5025893; doi:10.1038/srep33369), 2016-09-16
Supplement: srep33369-s1.pdf [file srep33369-s1.pdf]

**Supplementary Information: Fig. S1-S8, Tables S1-S11**

**Phenotypic, histological and proteomic analyses reveal multiple differences associated with chloroplast development in yellow and variegated variants from *Camellia sinensis***

Chengying Ma<sup>1</sup>, Junxi Cao<sup>1, †</sup>, Jianke Li<sup>2</sup>, Bo Zhou<sup>1</sup>, Jinchi Tang<sup>1</sup>, Aiqing Miao<sup>1, †</sup>

<sup>1</sup>Tea Research Institute, Guangdong Academy of Agricultural Sciences, Guangzhou 510640, China

<sup>2</sup> Institute of Apicultural Research/Key Laboratory of Pollinating Insect Biology, Ministry of Agriculture, Chinese Academy of Agricultural Sciences, Beijing 100093, China

† To whom correspondence should be addressed.

Aiqing Miao: miaoaiqing248@163.com,

Junxi Cao: junxic@126.com

Table S1 Specific primers for quantitative PCR analysis

| Primer name    | Forward sequence (5'-3')    | Reverse sequence (5'-3') |
|----------------|-----------------------------|--------------------------|
| gi   225437428 | AGCGGGTTACAATGATGTGA        | TCGATTTGTTTGGGCTGATA     |
| gi   225429772 | AGCATCAGCAACAGCAATTC        | GCTGGTGTATTTCCAGAGCA     |
| gi   552540866 | TGACTAGAACTGTCACTGTTACTTGAA | TCGTAATGCAGAAACATTACCTG  |
| gi   225436257 | GGGCTGACCCATACTACTCTT       | TGGAACCTCCTGTGCTCTG      |
| gi   731416683 | AGATGGTCCAACCACTGTGA        | ATGTGGTCCAGTTGACATGC     |
| gi   225457971 | AGCTCCGGTTTGATATGTCC        | GTCGGGCCATCTTGAGTAGT     |
| gi   225459564 | CCTAAGCCGAAGGTTGAAAG        | TGCTTCTCCCAACAAAGATG     |
| gi   526117629 | TTGCTTGTGTGGTGATGTTG        | TGACCACCAGTCCTCAGGTA     |
| gi   225463990 | TATCCCAAACGTCTCATCA         | CCACCCATCATATCATTGTC     |
| gi   225443988 | TCCATCAGCAAACAGGAAAG        | TATCTGCAAGGGTGAAACCA     |
| gi   359475502 | CTCCAATCCAACCCTCTCAT        | TTTGTGCTTCTCAGGTGAC      |
| gi   359494267 | ATGCTGGGAGGAGAATATGG        | GTCGACATACCCGAATTCCT     |
| gi   224094244 | ACTGATGGTGCACCTTGTGGT       | GCTCAAGGAAGCACCTATCC     |
| gi   731428049 | GCTTGCATACTTCGCTGTGT        | GTGCTGGAGCAGATGTTGTC     |
| gi   552541026 | CATGTATTTCCACGGTGCTC        | TTTGTATTCTCGGAAACCC      |
| gi   225457361 | ACGAGCACAACCAGACAGAG        | TGTCACAACAGCACTCCTCA     |
| gi   526118093 | GCTGAGAAGCATCACATCGT        | AACACCTCCCAAGTTTCGTC     |
| gi   671743230 | GCCGACTCCTACTGGGAATA        | GAAGGCTGGATCGTAGGAAG     |
| gi   566146555 | GAGGCTACTGAGGAGGAACG        | GAGCCTTCCTGAGGGTAATG     |
| gi   224107655 | GACCGACCAGCCTAGAGTGT        | CCTCTTGCACGTAGCCATTA     |

Table S2 The identified proteins in CK1

| Protein Group | Protein ID | Accession    | -10lgP | Coverage (%) | #Peptides | #Unique | PTM                                 | Avg. Mass | Description                                                                        |
|---------------|------------|--------------|--------|--------------|-----------|---------|-------------------------------------|-----------|------------------------------------------------------------------------------------|
| 8             | 6          | gi 359495606 | 299.92 | 50           | 43        | 2       | Carbamidomethylation; Oxidation (M) | 80006     | PREDICTED: heat shock cognate protein 80 [Vitis vinifera]                          |
| 1             | 16386      | gi 669100005 | 299.39 | 76           | 38        | 38      | Carbamidomethylation                | 52635     | ribulose biphosphate carboxylase large chain (chloroplast) [Camellia crapnelliana] |
| 11            | 7          | gi 225462013 | 294.76 | 47           | 41        | 2       | Carbamidomethylation                | 80849     | PREDICTED: heat shock cognate protein 80-like [Vitis vinifera]                     |
| 5             | 1          | gi 225426385 | 285.18 | 72           | 29        | 1       | Carbamidomethylation                | 50292     | PREDICTED: tubulin beta-2 chain [Vitis vinifera]                                   |
| 10            | 5          | gi 359486799 | 283.97 | 55           | 36        | 2       | Carbamidomethylation; Oxidation (M) | 71171     | PREDICTED: heat shock cognate 70 kDa protein 2 [Vitis vinifera]                    |
| 13            | 10         | gi 225434984 | 282.15 | 56           | 36        | 1       | Carbamidomethylation; Oxidation (M) | 71235     | PREDICTED: heat shock cognate 70 kDa protein 2 [Vitis vinifera]                    |
| 29            | 16417      | gi 224056837 | 279.01 | 42           | 38        | 2       | Carbamidomethylation; Oxidation (M) | 80026     | hypothetical protein POPTR_0001s47020g [Populus trichocarpa]                       |
| 33            | 16411      | gi 224100971 | 278.05 | 57           | 34        | 1       | Carbamidomethylation; Oxidation (M) | 71117     | heat shock protein 70 cognate [Populus trichocarpa]                                |
| 18            | 8          | gi 225426164 | 277.96 | 40           | 33        | 2       | Carbamidomethylation                | 80852     | PREDICTED: heat shock protein 83 [Vitis vinifera]                                  |
| 15            | 16395      | gi 566195847 | 277.71 | 60           | 26        | 1       | Carbamidomethylation                | 50164     | tubulin beta chain family protein [Populus trichocarpa]                            |
| 2             | 16405      | gi 566225321 | 276.6  | 72           | 26        | 3       | Carbamidomethylation; Oxidation (M) | 41712     | actin family protein [Populus trichocarpa]                                         |
| 17            | 16         | gi 225440324 | 275.65 | 52           | 35        | 1       | Carbamidomethylation; Oxidation (M) | 71066     | PREDICTED: heat shock cognate 70 kDa protein 2 [Vitis vinifera]                    |
| 24            | 16410      | gi 566191989 | 275.42 | 55           | 35        | 1       | Carbamidomethylation; Oxidation (M) | 71140     | heat shock protein 70 cognate [Populus trichocarpa]                                |
| 3             | 12         | gi 731410014 | 274.04 | 70           | 25        | 1       | Carbamidomethylation                | 41593     | PREDICTED: actin-101 [Vitis vinifera]                                              |

|     |       |              |        |    |    |   |                                     |       |                                                                                                   |
|-----|-------|--------------|--------|----|----|---|-------------------------------------|-------|---------------------------------------------------------------------------------------------------|
| 44  | 18    | gi 225452767 | 267.21 | 57 | 23 | 3 | Carbamidomethylation                | 49622 | PREDICTED: tubulin alpha chain [Vitis vinifera]                                                   |
| 30  | 17    | gi 225434722 | 258.32 | 58 | 25 | 2 | Carbamidomethylation                | 50275 | PREDICTED: tubulin beta-2 chain [Vitis vinifera]                                                  |
| 57  | 16494 | gi 566146990 | 245.53 | 32 | 21 | 1 | Carbamidomethylation; Oxidation (M) | 71882 | heat shock protein 70 cognate [Populus trichocarpa]                                               |
| 54  | 45    | gi 225435758 | 245.37 | 49 | 19 | 4 | Carbamidomethylation                | 49669 | PREDICTED: tubulin alpha-3 chain [Vitis vinifera]                                                 |
| 68  | 36    | gi 225426230 | 244.7  | 35 | 30 | 1 | Carbamidomethylation; Oxidation (M) | 73581 | PREDICTED: luminal-binding protein 5 [Vitis vinifera]                                             |
| 50  | 16441 | gi 224146039 | 241.8  | 33 | 25 | 1 | Carbamidomethylation                | 85012 | hypothetical protein POPTR_0019s05430g [Populus trichocarpa]                                      |
| 63  | 46    | gi 225445820 | 239.37 | 30 | 19 | 1 | Carbamidomethylation                | 71402 | PREDICTED: heat shock 70 kDa protein [Vitis vinifera]                                             |
| 34  | 31    | gi 225439223 | 237.79 | 31 | 24 | 4 | Carbamidomethylation                | 84991 | PREDICTED: 5-methyltetrahydropteroyltriglutamate--homocysteine methyltransferase [Vitis vinifera] |
| 110 | 20    | gi 225440045 | 234.42 | 44 | 29 | 4 | Carbamidomethylation; Oxidation (M) | 89589 | PREDICTED: cell division cycle protein 48 homolog [Vitis vinifera]                                |
| 56  | 16456 | gi 566188157 | 227.78 | 27 | 20 | 3 | Carbamidomethylation                | 89855 | hypothetical protein POPTR_0009s15490g [Populus trichocarpa]                                      |
| 70  | 16510 | gi 566146992 | 226.31 | 24 | 14 | 1 | Carbamidomethylation                | 71904 | heat shock protein 70 cognate [Populus trichocarpa]                                               |
| 130 | 16503 | gi 224073124 | 225.48 | 34 | 20 | 1 | Carbamidomethylation                | 64544 | chaperonin precursor family protein [Populus trichocarpa]                                         |
| 74  | 26    | gi 225456079 | 221.3  | 40 | 16 | 3 | Carbamidomethylation                | 59180 | PREDICTED: ATP synthase subunit beta mitochondrial-like [Vitis vinifera]                          |
| 103 | 16444 | gi 224094244 | 221.19 | 28 | 22 | 3 | Carbamidomethylation                | 93953 | elongation factor 2 family protein [Populus trichocarpa]                                          |
| 65  | 160   | gi 359491599 | 221.14 | 39 | 13 | 2 | Carbamidomethylation                | 36735 | PREDICTED: glyceraldehyde-3-phosphate dehydrogenase cytosolic [Vitis vinifera]                    |

|     |       |              |        |    |    |   |                      |       |                                                                                                          |
|-----|-------|--------------|--------|----|----|---|----------------------|-------|----------------------------------------------------------------------------------------------------------|
| 111 | 41    | gi 225456004 | 220.63 | 24 | 18 | 6 | Carbamidomethylation | 75635 | PREDICTED: stromal 70 kDa heat shock-related protein chloroplastic [Vitis vinifera]                      |
| 86  | 16496 | gi 224085900 | 220.21 | 24 | 22 | 6 |                      | 94047 | hypothetical protein POPTR_0005s26260g [Populus trichocarpa]                                             |
| 102 | 42    | gi 731393262 | 219.28 | 41 | 26 | 3 | Carbamidomethylation | 64608 | PREDICTED: ruBisCO large subunit-binding protein subunit beta chloroplastic [Vitis vinifera]             |
| 99  | 78    | gi 359478916 | 219.09 | 36 | 15 | 3 | Carbamidomethylation | 48674 | PREDICTED: ribulose biphosphate carboxylase/oxygenase activase chloroplastic isoform X2 [Vitis vinifera] |
| 47  | 33    | gi 225437708 | 218.08 | 47 | 14 | 1 | Carbamidomethylation | 42793 | PREDICTED: S-adenosylmethionine synthase 5 [Vitis vinifera]                                              |
| 41  | 34    | gi 225432155 | 216.68 | 51 | 15 | 1 | Carbamidomethylation | 43114 | PREDICTED: S-adenosylmethionine synthase 2 [Vitis vinifera]                                              |
| 95  | 16511 | gi 566196410 | 216.3  | 27 | 21 | 3 | Oxidation (M)        | 73406 | BiP isoform A family protein [Populus trichocarpa]                                                       |
| 101 | 16475 | gi 224099437 | 214.5  | 36 | 14 | 1 | Carbamidomethylation | 59970 | H <sup>+</sup> -transporting two-sector ATPase family protein [Populus trichocarpa]                      |
| 109 | 39    | gi 225462164 | 212.98 | 26 | 21 | 3 | Carbamidomethylation | 93979 | PREDICTED: elongation factor 2 [Vitis vinifera]                                                          |
| 87  | 44    | gi 359473642 | 210.62 | 21 | 13 | 3 | Carbamidomethylation | 90465 | PREDICTED: heat shock protein 90-1 [Vitis vinifera]                                                      |
| 155 | 120   | gi 733214771 | 209.21 | 22 | 18 | 1 |                      | 73139 | mediator of RNA polymerase II transcription subunit 37a precursor [Vitis vinifera]                       |
| 76  | 16500 | gi 224136806 | 207.52 | 43 | 18 | 3 | Carbamidomethylation | 47928 | hypothetical protein POPTR_0015s14380g [Populus trichocarpa]                                             |
| 161 | 16476 | gi 566212215 | 206.06 | 39 | 19 | 4 | Carbamidomethylation | 53198 | adenosylhomocysteinase family protein [Populus trichocarpa]                                              |

|     |       |              |        |    |    |    |                      |       |                                                                                                          |
|-----|-------|--------------|--------|----|----|----|----------------------|-------|----------------------------------------------------------------------------------------------------------|
| 141 | 16468 | gi 542688129 | 205.93 | 47 | 17 | 16 |                      | 53694 | ATP synthase CF1 beta subunit (chloroplast) [Camellia taliensis]                                         |
| 66  | 16466 | gi 566199288 | 205.78 | 40 | 12 | 1  | Carbamidomethylation | 42361 | NAD-dependent epimerase/dehydratase family protein [Populus trichocarpa]                                 |
| 114 | 67    | gi 224365668 | 203.2  | 36 | 18 | 16 |                      | 55143 | ATPase subunit 1 (mitochondrion) [Vitis vinifera]                                                        |
| 145 | 125   | gi 731401345 | 202.48 | 31 | 13 | 1  | Carbamidomethylation | 47976 | PREDICTED: ribulose biphosphate carboxylase/oxygenase activase chloroplastic isoform X2 [Vitis vinifera] |
| 90  | 100   | gi 225457939 | 200.86 | 22 | 20 | 3  | Carbamidomethylation | 93220 | PREDICTED: endoplasmic homolog [Vitis vinifera]                                                          |
| 93  | 353   | gi 359483839 | 199.58 | 52 | 9  | 1  | Carbamidomethylation | 27890 | PREDICTED: chlorophyll a-b binding protein of LHCII type 1 [Vitis vinifera]                              |
| 144 | 16518 | gi 566204581 | 199.5  | 16 | 10 | 2  | Carbamidomethylation | 82947 | hypothetical protein POPTR_0014s16280g [Populus trichocarpa]                                             |
| 79  | 110   | gi 359490179 | 199.08 | 24 | 16 | 3  | Carbamidomethylation | 78856 | PREDICTED: transketolase chloroplastic [Vitis vinifera]                                                  |
| 61  | 102   | gi 731393868 | 199.04 | 17 | 15 | 1  | Carbamidomethylation | 89385 | PREDICTED: 5-methyltetrahydropteroyltriglutamate--homocysteine methyltransferase 2 [Vitis vinifera]      |
| 163 | 16612 | gi 566182577 | 197.7  | 28 | 13 | 3  | Carbamidomethylation | 48316 | hypothetical protein POPTR_0008s05870g [Populus trichocarpa]                                             |
| 83  | 58    | gi 225449120 | 197.69 | 34 | 16 | 1  | Carbamidomethylation | 49376 | PREDICTED: elongation factor 1-alpha [Vitis vinifera]                                                    |
| 72  | 94    | gi 225464999 | 197.08 | 36 | 13 | 4  |                      | 42422 | PREDICTED: phosphoglycerate kinase cytosolic [Vitis vinifera]                                            |
| 162 | 92    | gi 359479362 | 196.27 | 29 | 16 | 3  |                      | 61984 | PREDICTED: ruBisCO large subunit-binding protein subunit alpha [Vitis vinifera]                          |

|     |       |              |        |    |    |    |                      |        |                                                                                    |
|-----|-------|--------------|--------|----|----|----|----------------------|--------|------------------------------------------------------------------------------------|
| 134 | 16497 | gi 224088798 | 195.88 | 38 | 15 | 14 | Carbamidomethylation | 46974  | translation initiation factor eIF-4A family protein [ <i>Populus trichocarpa</i> ] |
| 197 | 98    | gi 731379109 | 195.81 | 17 | 12 | 3  | Carbamidomethylation | 110565 | PREDICTED: puromycin-sensitive aminopeptidase isoform X1 [ <i>Vitis vinifera</i> ] |
| 81  | 16526 | gi 224063766 | 195.08 | 23 | 15 | 2  | Carbamidomethylation | 80716  | transketolase family protein [ <i>Populus trichocarpa</i> ]                        |
| 175 | 116   | gi 731410136 | 194.76 | 14 | 11 | 2  | Carbamidomethylation | 95223  | PREDICTED: heat shock protein 83 isoform X3 [ <i>Vitis vinifera</i> ]              |
| 119 | 17009 | gi 224065861 | 193.89 | 52 | 10 | 5  | Carbamidomethylation | 18243  | Peptidyl-prolyl cis-trans isomerase family protein [ <i>Populus trichocarpa</i> ]  |
| 154 | 104   | gi 225456806 | 193.79 | 33 | 16 | 1  | Carbamidomethylation | 53079  | PREDICTED: adenosylhomocysteinase-like [ <i>Vitis vinifera</i> ]                   |
| 157 | 72    | gi 225456880 | 193.68 | 30 | 12 | 4  | Carbamidomethylation | 52692  | PREDICTED: elongation factor TuB chloroplastic [ <i>Vitis vinifera</i> ]           |
| 82  | 252   | gi 526117553 | 193.64 | 33 | 9  | 1  | Carbamidomethylation | 39322  | glutamine synthetase cytosolic isozyme 2 [ <i>Vitis vinifera</i> ]                 |
| 69  | 76    | gi 225432858 | 192.17 | 36 | 13 | 1  | Carbamidomethylation | 42449  | PREDICTED: GDP-mannose 3 5-epimerase 2 isoform X2 [ <i>Vitis vinifera</i> ]        |
| 91  | 138   | gi 731423140 | 191.86 | 31 | 15 | 1  | Carbamidomethylation | 55855  | PREDICTED: enolase [ <i>Vitis vinifera</i> ]                                       |
| 108 | 16572 | gi 566204141 | 190.41 | 38 | 14 | 8  | Carbamidomethylation | 42935  | hypothetical protein POPTR_0014s13660g [ <i>Populus trichocarpa</i> ]              |
| 117 | 205   | gi 526117591 | 189.44 | 28 | 11 | 1  | Carbamidomethylation | 49581  | chalcone synthase [ <i>Vitis vinifera</i> ]                                        |
| 96  | 16607 | gi 224109060 | 188.92 | 35 | 15 | 2  |                      | 50212  | PHOSPHOGLYCERATE KINASE 1 family protein [ <i>Populus trichocarpa</i> ]            |
| 92  | 145   | gi 225464995 | 187.41 | 31 | 14 | 2  |                      | 50083  | PREDICTED: phosphoglycerate kinase chloroplastic [ <i>Vitis vinifera</i> ]         |

|     |       |              |        |    |    |    |                      |        |                                                                                                            |
|-----|-------|--------------|--------|----|----|----|----------------------|--------|------------------------------------------------------------------------------------------------------------|
| 164 | 85    | gi 225460328 | 186.64 | 18 | 13 | 1  | Carbamidomethylation | 74178  | PREDICTED: stromal 70 kDa heat shock-related protein chloroplastic-like [Vitis vinifera]                   |
| 104 | 159   | gi 225462777 | 185.29 | 34 | 11 | 1  | Carbamidomethylation | 42597  | PREDICTED: chalcone synthase 2 [Vitis vinifera]                                                            |
| 113 | 16660 | gi 566163210 | 183.72 | 28 | 11 | 1  | Carbamidomethylation | 42709  | naregenin-chalcone synthase family protein [Populus trichocarpa]                                           |
| 170 | 130   | gi 731402352 | 183.36 | 24 | 18 | 1  | Carbamidomethylation | 65010  | PREDICTED: ruBisCO large subunit-binding protein subunit beta chloroplastic [Vitis vinifera]               |
| 150 | 16609 | gi 224053971 | 183.2  | 30 | 11 | 2  | Carbamidomethylation | 52743  | hypothetical protein POPTR_0001s08770g [Populus trichocarpa]                                               |
| 151 | 146   | gi 731418890 | 183.2  | 29 | 11 | 1  | Carbamidomethylation | 52944  | PREDICTED: elongation factor Tu chloroplastic-like [Vitis vinifera]                                        |
| 78  | 121   | gi 225425884 | 183.14 | 35 | 14 | 1  | Carbamidomethylation | 36759  | PREDICTED: glyceraldehyde-3-phosphate dehydrogenase cytosolic [Vitis vinifera]                             |
| 209 | 16775 | gi 566198898 | 183.04 | 15 | 11 | 1  |                      | 73464  | heat shock protein 70 cognate [Populus trichocarpa]                                                        |
| 166 | 17040 | gi 566184599 | 182.19 | 24 | 9  | 3  |                      | 37085  | glyceraldehyde 3-phosphate dehydrogenase family protein [Populus trichocarpa]                              |
| 306 | 61    | gi 731426977 | 182.07 | 18 | 13 | 11 | Carbamidomethylation | 102347 | PREDICTED: ATP-dependent Clp protease ATP-binding subunit clpA homolog CD4B chloroplastic [Vitis vinifera] |
| 319 | 136   | gi 225456274 | 181.84 | 25 | 11 | 3  | Carbamidomethylation | 55180  | PREDICTED: argininosuccinate synthase chloroplastic [Vitis vinifera]                                       |
| 168 | 66    | gi 225460961 | 181.8  | 16 | 14 | 2  | Carbamidomethylation | 110056 | PREDICTED: aconitate hydratase cytoplasmic [Vitis vinifera]                                                |



|     |       |              |        |    |    |    |                                     |        |                                                                                                     |
|-----|-------|--------------|--------|----|----|----|-------------------------------------|--------|-----------------------------------------------------------------------------------------------------|
| 182 | 16545 | gi 566168009 | 181.09 | 24 | 14 | 1  |                                     | 62041  | RUBISCO SUBUNIT BINDING-protein ALPHA SUBUNIT [Populus trichocarpa]                                 |
| 179 | 166   | gi 225433510 | 180.74 | 25 | 9  | 4  | Carbamidomethylation                | 51906  | PREDICTED: serine hydroxymethyltransferase 4 [Vitis vinifera]                                       |
| 186 | 16674 | gi 542688125 | 180.65 | 25 | 9  | 9  |                                     | 56099  | photosystem II p680 chlorophyll A apoprotein CP-47 (chloroplast) [Camellia taliensis]               |
| 274 | 16517 | gi 224097420 | 179.16 | 22 | 12 | 12 | Carbamidomethylation                | 68619  | Vacuolar ATP synthase catalytic subunit A family protein [Populus trichocarpa]                      |
| 147 | 203   | gi 526117485 | 177.56 | 39 | 10 | 2  | Carbamidomethylation                | 40813  | naringenin 2-oxoglutarate 3-dioxygenase [Vitis vinifera]                                            |
| 226 | 256   | gi 731418471 | 174.86 | 30 | 10 | 1  | Carbamidomethylation                | 38687  | PREDICTED: mitochondrial phosphate carrier protein 3 mitochondrial isoform X2 [Vitis vinifera]      |
| 214 | 16575 | gi 224063263 | 174.61 | 25 | 13 | 7  | Carbamidomethylation                | 58692  | 2-dehydro-3-deoxyphosphoheptonate aldolase family protein [Populus trichocarpa]                     |
| 269 | 16939 | gi 224109788 | 174.22 | 28 | 9  | 1  | Carbamidomethylation                | 37547  | putative adenosine kinase family protein [Populus trichocarpa]                                      |
| 250 | 200   | gi 225427768 | 173.87 | 40 | 9  | 3  | Carbamidomethylation                | 42948  | PREDICTED: fructose-bisphosphate aldolase 1 chloroplastic [Vitis vinifera]                          |
| 105 | 143   | gi 731415862 | 173.38 | 30 | 14 | 6  | Carbamidomethylation                | 49362  | PREDICTED: calreticulin [Vitis vinifera]                                                            |
| 225 | 16583 | gi 224079726 | 173.03 | 29 | 13 | 13 | Carbamidomethylation                | 46428  | isocitrate dehydrogenase family protein [Populus trichocarpa]                                       |
| 321 | 128   | gi 225430776 | 171.6  | 22 | 11 | 11 | Carbamidomethylation                | 73659  | PREDICTED: succinate dehydrogenase [ubiquinone] flavoprotein subunit mitochondrial [Vitis vinifera] |
| 316 | 38    | gi 225448483 | 171.24 | 8  | 12 | 1  | Carbamidomethylation; Oxidation (M) | 192967 | PREDICTED: clathrin heavy chain 1 [Vitis vinifera]                                                  |

|     |       |              |        |    |    |   |                      |       |                                                                                  |
|-----|-------|--------------|--------|----|----|---|----------------------|-------|----------------------------------------------------------------------------------|
| 320 | 16787 | gi 224102193 | 168.59 | 25 | 9  | 3 | Carbamidomethylation | 35716 | cytosolic malate dehydrogenase family protein [Populus trichocarpa]              |
| 301 | 16605 | gi 224141947 | 167.64 | 23 | 10 | 2 | Carbamidomethylation | 53416 | hypothetical protein POPTR_0018s02400g [Populus trichocarpa]                     |
| 137 | 16865 | gi 224101491 | 167.02 | 70 | 10 | 1 | Carbamidomethylation | 20563 | ADP-ribosylation factor family protein [Populus trichocarpa]                     |
| 305 | 89    | gi 731402464 | 166.05 | 15 | 10 | 2 | Carbamidomethylation | 93319 | PREDICTED: heat shock 70 kDa protein 14-like [Vitis vinifera]                    |
| 206 | 248   | gi 225433375 | 165.62 | 21 | 11 | 1 | Carbamidomethylation | 61370 | PREDICTED: chaperonin CPN60-2 mitochondrial [Vitis vinifera]                     |
| 270 | 17042 | gi 566164883 | 165.35 | 21 | 10 | 3 | Carbamidomethylation | 43246 | ketol-acid reductoisomerase family protein partial [Populus trichocarpa]         |
| 193 | 258   | gi 731404310 | 165.34 | 26 | 8  | 7 | Carbamidomethylation | 33129 | PREDICTED: putative lactoylglutathione lyase [Vitis vinifera]                    |
| 369 | 101   | gi 225429228 | 165.17 | 16 | 10 | 1 |                      | 72770 | PREDICTED: heat shock 70 kDa protein mitochondrial [Vitis vinifera]              |
| 88  | 16659 | gi 224110772 | 163.97 | 27 | 10 | 1 | Carbamidomethylation | 37124 | glyceraldehyde 3-phosphate dehydrogenase family protein [Populus trichocarpa]    |
| 614 | 17095 | gi 224100953 | 163.58 | 28 | 8  | 2 | Carbamidomethylation | 39107 | thymidine diphospho-glucose 4-6-dehydratase family protein [Populus trichocarpa] |
| 159 | 16723 | gi 224141865 | 163.4  | 36 | 8  | 8 | Carbamidomethylation | 25015 | GTP-binding family protein [Populus trichocarpa]                                 |
| 127 | 16640 | gi 671743230 | 162.38 | 12 | 8  | 7 | Carbamidomethylation | 82370 | photosystem I P700 apoprotein A2 (chloroplast) [Camellia petelotii]              |
| 129 | 494   | gi 225449541 | 161.89 | 24 | 7  | 2 | Carbamidomethylation | 27128 | PREDICTED: triosephosphate isomerase cytosolic [Vitis vinifera]                  |
| 469 | 17246 | gi 566190515 | 161.76 | 25 | 6  | 5 | Carbamidomethylation | 42536 | hypothetical protein POPTR_0010s12790g [Populus trichocarpa]                     |

|     |       |              |        |    |    |   |                      |       |                                                                                 |
|-----|-------|--------------|--------|----|----|---|----------------------|-------|---------------------------------------------------------------------------------|
| 488 | 500   | gi 225440011 | 160.27 | 12 | 5  | 1 |                      | 77480 | PREDICTED: phenylalanine ammonia-lyase [Vitis vinifera]                         |
| 256 | 237   | gi 225446579 | 160.24 | 14 | 10 | 3 | Carbamidomethylation | 63486 | PREDICTED: ketol-acid reductoisomerase chloroplastic [Vitis vinifera]           |
| 124 | 338   | gi 225427917 | 160.04 | 26 | 10 | 4 | Carbamidomethylation | 34675 | PREDICTED: triosephosphate isomerase chloroplastic [Vitis vinifera]             |
| 233 | 16962 | gi 224128376 | 159.82 | 22 | 9  | 4 | Carbamidomethylation | 39401 | thioredoxin family protein [Populus trichocarpa]                                |
| 310 | 141   | gi 731419756 | 159.42 | 23 | 9  | 2 | Carbamidomethylation | 52962 | PREDICTED: UDP-glucose 6-dehydrogenase 1 [Vitis vinifera]                       |
| 135 | 16861 | gi 224068638 | 158.41 | 70 | 11 | 2 | Carbamidomethylation | 20680 | hypothetical protein POPTR_0002s19210g [Populus trichocarpa]                    |
| 177 | 315   | gi 225457971 | 157.7  | 33 | 9  | 1 | Carbamidomethylation | 40415 | PREDICTED: flavanone 3-dioxygenase [Vitis vinifera]                             |
| 218 | 295   | gi 359480275 | 157.34 | 22 | 6  | 1 |                      | 35505 | PREDICTED: malate dehydrogenase cytoplasmic [Vitis vinifera]                    |
| 156 | 17045 | gi 224084209 | 157.15 | 18 | 7  | 2 | Carbamidomethylation | 35142 | O2 evolving complex 33kD family protein [Populus trichocarpa]                   |
| 300 | 16574 | gi 224058852 | 156.83 | 14 | 11 | 3 | Carbamidomethylation | 94161 | heat shock protein 70 [Populus trichocarpa]                                     |
| 247 | 16791 | gi 566173570 | 156.56 | 19 | 8  | 2 | Carbamidomethylation | 44912 | hypothetical protein POPTR_0005s27550g [Populus trichocarpa]                    |
| 349 | 16713 | gi 566213382 | 155.47 | 20 | 9  | 2 | Carbamidomethylation | 53743 | phosphogluconate dehydrogenase family protein [Populus trichocarpa]             |
| 278 | 17023 | gi 566202051 | 155.3  | 14 | 7  | 2 | Carbamidomethylation | 71118 | hypothetical protein POPTR_0014s02550g [Populus trichocarpa]                    |
| 287 | 269   | gi 359476642 | 155.15 | 23 | 7  | 1 | Carbamidomethylation | 42804 | PREDICTED: fructose-bisphosphate aldolase 1 chloroplastic-like [Vitis vinifera] |
| 248 | 449   | gi 731420830 | 154.79 | 31 | 7  | 7 |                      | 31951 | PREDICTED: prohibitin-1 mitochondrial [Vitis vinifera]                          |

|     |       |              |        |    |    |   |                      |       |                                                                               |
|-----|-------|--------------|--------|----|----|---|----------------------|-------|-------------------------------------------------------------------------------|
| 229 | 16634 | gi 224059642 | 154.69 | 25 | 10 | 1 |                      | 42100 | adenine nucleotide translocator family protein [Populus trichocarpa]          |
| 375 | 16970 | gi 568244554 | 154.25 | 25 | 6  | 6 |                      | 39549 | photosystem II protein D2 (plastid) [Camellia oleifera]                       |
| 189 | 227   | gi 224365636 | 153.72 | 13 | 8  | 8 |                      | 69587 | PSII 32 kDa protein (mitochondrion) [Vitis vinifera]                          |
| 172 | 16968 | gi 566210965 | 153.05 | 27 | 10 | 1 |                      | 39217 | glutamate-ammonia ligase family protein [Populus trichocarpa]                 |
| 331 | 16636 | gi 566181869 | 152.94 | 17 | 8  | 1 | Carbamidomethylation | 54252 | hypothetical protein POPTR_0008s02110g [Populus trichocarpa]                  |
| 393 | 16712 | gi 224100783 | 152.88 | 11 | 5  | 1 |                      | 77598 | phenylalanine ammonia-lyase family protein [Populus trichocarpa]              |
| 195 | 16693 | gi 566209405 | 152.05 | 24 | 9  | 1 |                      | 44445 | hypothetical protein POPTR_0016s08780g [Populus trichocarpa]                  |
| 149 | 16625 | gi 671743315 | 151.34 | 19 | 7  | 6 |                      | 51822 | photosystem II CP43 chlorophyll apoprotein (chloroplast) [Camellia pubicosta] |
| 327 | 194   | gi 225442018 | 151.08 | 29 | 8  | 1 | Carbamidomethylation | 33909 | PREDICTED: 40S ribosomal protein SA [Vitis vinifera]                          |
| 210 | 16635 | gi 566178983 | 150.97 | 23 | 9  | 1 |                      | 41070 | hypothetical protein POPTR_0007s01010g [Populus trichocarpa]                  |
| 235 | 149   | gi 225435480 | 150.84 | 26 | 10 | 1 |                      | 42838 | PREDICTED: ADP ATP carrier protein mitochondrial [Vitis vinifera]             |
| 239 | 17104 | gi 671743459 | 150.79 | 83 | 7  | 7 | Carbamidomethylation | 9038  | photosystem I subunit VII (chloroplast) [Camellia reticulata]                 |
| 262 | 163   | gi 225456339 | 150.2  | 28 | 9  | 1 | Carbamidomethylation | 41981 | PREDICTED: UDP-arabinopyranose mutase 1 isoform X2 [Vitis vinifera]           |
| 160 | 16797 | gi 224109062 | 150.15 | 24 | 9  | 1 |                      | 42679 | cytosolic phosphoglycerate kinase family protein [Populus trichocarpa]        |

|     |       |              |        |    |    |   |                                        |        |                                                                                            |
|-----|-------|--------------|--------|----|----|---|----------------------------------------|--------|--------------------------------------------------------------------------------------------|
| 169 | 16871 | gi 566205887 | 149.73 | 29 | 9  | 1 | Carbamidomethylation;<br>Oxidation (M) | 38451  | glutamine synthetase family<br>protein [Populus trichocarpa]                               |
| 367 | 304   | gi 225425053 | 149.71 | 18 | 8  | 1 | Carbamidomethylation                   | 53492  | PREDICTED: 6-<br>phosphogluconate<br>dehydrogenase decarboxylating<br>3 [Vitis vinifera]   |
| 438 | 16573 | gi 566151627 | 149.57 | 13 | 9  | 1 |                                        | 73210  | heat shock protein 70 [Populus<br>trichocarpa]                                             |
| 252 | 16593 | gi 552541036 | 149.32 | 21 | 10 | 8 |                                        | 55539  | ATP synthase CF1 alpha subunit<br>(chloroplast) [Camellia<br>yunnanensis]                  |
| 342 | 365   | gi 225459918 | 149.32 | 27 | 6  | 2 | Carbamidomethylation                   | 30824  | PREDICTED: chlorophyll a-b<br>binding protein CP26<br>chloroplastic [Vitis vinifera]       |
| 241 | 16953 | gi 224105301 | 149.18 | 24 | 7  | 1 | Carbamidomethylation                   | 42832  | latex plastidic aldolase-like<br>family protein [Populus<br>trichocarpa]                   |
| 497 | 16615 | gi 224078391 | 147.78 | 15 | 6  | 1 |                                        | 54253  | vacuolar ATP synthase subunit B<br>family protein [Populus<br>trichocarpa]                 |
| 356 | 16506 | gi 224065685 | 146.82 | 22 | 9  | 9 | Carbamidomethylation                   | 56639  | catalase family protein [Populus<br>trichocarpa]                                           |
| 211 | 16633 | gi 566186668 | 146.49 | 22 | 9  | 1 |                                        | 41811  | ADP family protein [Populus<br>trichocarpa]                                                |
| 205 | 16784 | gi 566175737 | 146.18 | 22 | 9  | 8 | Carbamidomethylation                   | 47050  | Monodehydroascorbate<br>reductase family protein<br>[Populus trichocarpa]                  |
| 146 | 313   | gi 225458424 | 146.13 | 17 | 6  | 1 | Carbamidomethylation                   | 35120  | PREDICTED: oxygen-evolving<br>enhancer protein 1 chloroplastic<br>[Vitis vinifera]         |
| 374 | 448   | gi 526117711 | 145.71 | 21 | 6  | 2 | Carbamidomethylation                   | 36875  | malate dehydrogenase [Vitis<br>vinifera]                                                   |
| 475 | 206   | gi 731385022 | 145.29 | 13 | 10 | 4 | Carbamidomethylation                   | 114759 | PREDICTED: glycine<br>dehydrogenase<br>(decarboxylating)<br>mitochondrial [Vitis vinifera] |
| 324 | 161   | gi 731388175 | 144.77 | 13 | 8  | 8 | Carbamidomethylation                   | 65990  | PREDICTED: ATP-citrate<br>synthase beta chain protein 2<br>[Vitis vinifera]                |

|     |       |              |        |    |    |   |                      |       |                                                                                            |
|-----|-------|--------------|--------|----|----|---|----------------------|-------|--------------------------------------------------------------------------------------------|
| 284 | 17341 | gi 566238007 | 144.54 | 20 | 5  | 1 | Carbamidomethylation | 30925 | Chlorophyll a-b binding protein CP26 [Populus trichocarpa]                                 |
| 125 | 16937 | gi 224098421 | 144.03 | 26 | 7  | 1 | Carbamidomethylation | 27259 | Triosephosphate isomerase family protein [Populus trichocarpa]                             |
| 512 | 344   | gi 225428086 | 143.82 | 15 | 6  | 1 |                      | 54287 | PREDICTED: V-type proton ATPase subunit B 2 [Vitis vinifera]                               |
| 238 | 389   | gi 225441754 | 143.57 | 12 | 6  | 2 |                      | 53382 | PREDICTED: adenylosuccinate synthetase 2 chloroplastic [Vitis vinifera]                    |
| 445 | 741   | gi 731399769 | 142.25 | 28 | 6  | 2 | Carbamidomethylation | 30174 | PREDICTED: 2-Cys peroxiredoxin isoform X1 [Vitis vinifera]                                 |
| 370 | 17076 | gi 224143955 | 142.08 | 54 | 7  | 3 | Carbamidomethylation | 17511 | eukaryotic translation initiation factor 5A isoform V family protein [Populus trichocarpa] |
| 231 | 208   | gi 359485034 | 141.57 | 18 | 7  | 7 |                      | 53389 | PREDICTED: xylose isomerase [Vitis vinifera]                                               |
| 249 | 139   | gi 225468576 | 141.57 | 12 | 10 | 2 | Carbamidomethylation | 98187 | PREDICTED: aconitate hydratase 1 [Vitis vinifera]                                          |
| 379 | 563   | gi 731376167 | 141.31 | 31 | 6  | 2 | Carbamidomethylation | 29267 | PREDICTED: proteasome subunit beta type-5 [Vitis vinifera]                                 |
| 295 | 16781 | gi 566165396 | 141.25 | 15 | 6  | 3 | Carbamidomethylation | 51757 | hypothetical protein POPTR_0004s07280g [Populus trichocarpa]                               |
| 304 | 17069 | gi 224077927 | 140.75 | 17 | 6  | 1 | Carbamidomethylation | 42796 | latex plastidic aldolase-like family protein [Populus trichocarpa]                         |
| 64  | 16867 | gi 566147823 | 140.22 | 9  | 7  | 3 | Oxidation (M)        | 83349 | hypothetical protein POPTR_0001s07870g [Populus trichocarpa]                               |
| 347 | 17140 | gi 224075758 | 139.91 | 50 | 6  | 6 | Carbamidomethylation | 15268 | hypothetical protein POPTR_0003s22120g [Populus trichocarpa]                               |
| 191 | 17348 | gi 566184073 | 139.66 | 43 | 8  | 3 | Carbamidomethylation | 22518 | photosystem I 20kD family protein [Populus trichocarpa]                                    |
| 440 | 16872 | gi 566170807 | 139.26 | 24 | 8  | 1 | Carbamidomethylation | 40534 | Chain A family protein [Populus trichocarpa]                                               |

|     |       |              |        |    |   |   |                      |        |                                                                                                |
|-----|-------|--------------|--------|----|---|---|----------------------|--------|------------------------------------------------------------------------------------------------|
| 329 | 16748 | gi 224060514 | 138.95 | 14 | 7 | 3 | Carbamidomethylation | 70476  | polyadenylate-binding family protein [Populus trichocarpa]                                     |
| 259 | 228   | gi 225451995 | 138.37 | 35 | 9 | 1 |                      | 29540  | PREDICTED: 14-3-3-like protein A [Vitis vinifera]                                              |
| 387 | 17251 | gi 224080233 | 137.96 | 14 | 6 | 1 | Carbamidomethylation | 53053  | UDP-glucose 6-dehydrogenase family protein [Populus trichocarpa]                               |
| 178 | 16804 | gi 224053300 | 137.55 | 47 | 9 | 2 |                      | 17702  | ubiquitin/ribosomal protein 27a [Populus trichocarpa]                                          |
| 422 | 16639 | gi 224086120 | 137.25 | 16 | 7 | 1 | Carbamidomethylation | 67209  | pyrophosphate-dependent phosphofructokinase alpha subunit family protein [Populus trichocarpa] |
| 358 | 16999 | gi 566161272 | 137.23 | 24 | 8 | 1 | Carbamidomethylation | 34289  | hypothetical protein POPTR_0003s06880g [Populus trichocarpa]                                   |
| 341 | 16823 | gi 224104269 | 136.16 | 32 | 7 | 1 | Carbamidomethylation | 22228  | peptidyl-prolyl cis-trans isomerase family protein [Populus trichocarpa]                       |
| 333 | 460   | gi 359483716 | 136.07 | 23 | 7 | 1 | Carbamidomethylation | 29551  | PREDICTED: 14-3-3-like protein D isoform X2 [Vitis vinifera]                                   |
| 425 | 335   | gi 225445867 | 135.85 | 16 | 7 | 2 | Carbamidomethylation | 60743  | PREDICTED: leucine aminopeptidase 1 [Vitis vinifera]                                           |
| 230 | 132   | gi 731428778 | 135.65 | 17 | 8 | 1 | Carbamidomethylation | 56891  | PREDICTED: serine hydroxymethyltransferase mitochondrial [Vitis vinifera]                      |
| 336 | 16665 | gi 224087339 | 135.57 | 19 | 9 | 1 | Carbamidomethylation | 57707  | biotin carboxylase precursor family protein [Populus trichocarpa]                              |
| 491 | 137   | gi 526117707 | 134.76 | 16 | 6 | 2 | Carbamidomethylation | 53695  | uncharacterized protein LOC100261274 [Vitis vinifera]                                          |
| 373 | 16958 | gi 224099363 | 133.94 | 8  | 7 | 5 |                      | 101194 | alpha-xylosidase family protein [Populus trichocarpa]                                          |
| 318 | 83    | gi 225430261 | 133.51 | 19 | 9 | 8 | Carbamidomethylation | 48395  | PREDICTED: DEAD-box ATP-dependent RNA helicase 56 [Vitis vinifera]                             |
| 283 | 316   | gi 359480881 | 133.44 | 7  | 5 | 5 | Carbamidomethylation | 94936  | PREDICTED: beta-galactosidase 10 [Vitis vinifera]                                              |

|     |       |              |        |    |   |   |                      |       |                                                                                                |
|-----|-------|--------------|--------|----|---|---|----------------------|-------|------------------------------------------------------------------------------------------------|
| 185 | 281   | gi 225465030 | 133.17 | 47 | 8 | 1 |                      | 17196 | PREDICTED: ubiquitin-NEDD8-like protein RUB2 [Vitis vinifera]                                  |
| 280 | 17398 | gi 224138586 | 132.96 | 15 | 4 | 2 |                      | 27577 | ascorbate peroxidase family protein [Populus trichocarpa]                                      |
| 180 | 165   | gi 359493870 | 132.72 | 15 | 8 | 2 | Carbamidomethylation | 42815 | PREDICTED: protochlorophyllide reductase chloroplastic [Vitis vinifera]                        |
| 466 | 413   | gi 225457075 | 132.64 | 17 | 7 | 1 | Carbamidomethylation | 58613 | PREDICTED: aldehyde dehydrogenase family 2 member B4 mitochondrial [Vitis vinifera]            |
| 339 | 374   | gi 225426162 | 132.43 | 36 | 6 | 2 | Carbamidomethylation | 20013 | PREDICTED: 40S ribosomal protein S10 [Vitis vinifera]                                          |
| 586 | 17453 | gi 224088276 | 132.14 | 14 | 5 | 1 | Carbamidomethylation | 50030 | leucine aminopeptidase family protein [Populus trichocarpa]                                    |
| 394 | 627   | gi 225464720 | 132.01 | 14 | 5 | 2 | Carbamidomethylation | 44946 | PREDICTED: oxygen-dependent coproporphyrinogen-III oxidase chloroplastic-like [Vitis vinifera] |
| 123 | 453   | gi 225447576 | 131.99 | 29 | 5 | 1 | Carbamidomethylation | 28468 | PREDICTED: chlorophyll a-b binding protein 151 chloroplastic [Vitis vinifera]                  |
| 528 | 17070 | gi 224064707 | 131.75 | 11 | 7 | 3 | Carbamidomethylation | 58836 | mitochondrial aldehyde dehydrogenase family protein [Populus trichocarpa]                      |
| 203 | 688   | gi 225437028 | 131.58 | 28 | 6 | 1 | Carbamidomethylation | 22563 | PREDICTED: photosystem I reaction center subunit II chloroplastic [Vitis vinifera]             |
| 410 | 585   | gi 225444377 | 131.51 | 20 | 5 | 1 | Carbamidomethylation | 38105 | PREDICTED: thiamine thiazole synthase 2 chloroplastic [Vitis vinifera]                         |
| 279 | 728   | gi 359485890 | 131.08 | 6  | 5 | 2 | Carbamidomethylation | 83365 | PREDICTED: beta-xylosidase/alpha-L-arabinofuranosidase 2-like [Vitis vinifera]                 |
| 181 | 170   | gi 225446944 | 130.98 | 19 | 7 | 1 | Carbamidomethylation | 43340 | PREDICTED: protochlorophyllide reductase [Vitis vinifera]                                      |



|     |       |              |        |    |   |   |                      |       |                                                                                         |
|-----|-------|--------------|--------|----|---|---|----------------------|-------|-----------------------------------------------------------------------------------------|
| 228 | 16942 | gi 566178461 | 130.95 | 14 | 7 | 5 |                      | 51019 | aspartate aminotransferase 2 family protein [Populus trichocarpa]                       |
| 355 | 16705 | gi 566210462 | 130.93 | 11 | 7 | 2 | Carbamidomethylation | 67453 | Methylenetetrahydrofolate reductase family protein [Populus trichocarpa]                |
| 892 | 18083 | gi 566159452 | 130.88 | 9  | 5 | 2 |                      | 75110 | hypothetical protein POPTR_0002s22560g [Populus trichocarpa]                            |
| 244 | 364   | gi 225451146 | 130.86 | 15 | 8 | 4 |                      | 57701 | PREDICTED: bifunctional 3-dehydroquinase dehydrogenase chloroplastic [Vitis vinifera]   |
| 389 | 271   | gi 225439064 | 130.85 | 14 | 6 | 3 |                      | 61092 | PREDICTED: 2 3-bisphosphoglycerate-independent phosphoglycerate mutase [Vitis vinifera] |
| 348 | 16923 | gi 552540866 | 130.6  | 27 | 7 | 5 |                      | 35220 | cytochrome f (chloroplast) [Camellia danzaiensis]                                       |
| 354 | 221   | gi 225445664 | 130.45 | 21 | 9 | 1 | Carbamidomethylation | 57338 | PREDICTED: biotin carboxylase 1 chloroplastic [Vitis vinifera]                          |
| 447 | 17192 | gi 566194916 | 130.44 | 44 | 6 | 5 | Carbamidomethylation | 18051 | hypothetical protein POPTR_0011s11260g [Populus trichocarpa]                            |
| 338 | 197   | gi 731406213 | 130.17 | 11 | 9 | 3 | Carbamidomethylation | 92443 | PREDICTED: sucrose synthase [Vitis vinifera]                                            |
| 584 | 111   | gi 225432252 | 130.02 | 16 | 6 | 6 |                      | 47374 | PREDICTED: 26S protease regulatory subunit 6A homolog [Vitis vinifera]                  |
| 403 | 16898 | gi 224116086 | 129.93 | 20 | 5 | 1 | Carbamidomethylation | 37284 | hypothetical protein POPTR_0011s00500g [Populus trichocarpa]                            |
| 302 | 251   | gi 225461654 | 129.52 | 27 | 8 | 2 | Carbamidomethylation | 28864 | PREDICTED: 14-3-3-like protein D [Vitis vinifera]                                       |
| 454 | 17032 | gi 224086697 | 129.51 | 63 | 6 | 6 | Carbamidomethylation | 16848 | calmodulin 6 family protein [Populus trichocarpa]                                       |

|     |       |              |        |    |    |   |                                     |        |                                                                                     |
|-----|-------|--------------|--------|----|----|---|-------------------------------------|--------|-------------------------------------------------------------------------------------|
| 460 | 818   | gi 731396254 | 129.03 | 15 | 5  | 5 | Carbamidomethylation                | 40707  | PREDICTED: alcohol dehydrogenase class-3 [Vitis vinifera]                           |
| 806 | 706   | gi 225446693 | 129.03 | 9  | 4  | 1 |                                     | 74318  | PREDICTED: ATP-dependent zinc metalloprotease FTSH 2 chloroplastic [Vitis vinifera] |
| 579 | 17122 | gi 224112138 | 128.92 | 14 | 6  | 1 | Carbamidomethylation                | 52794  | hypothetical protein POPTR_0010s16730g [Populus trichocarpa]                        |
| 413 | 16922 | gi 224058615 | 128.92 | 20 | 5  | 2 | Carbamidomethylation                | 33817  | hypothetical protein POPTR_0001s08570g [Populus trichocarpa]                        |
| 437 | 254   | gi 225430619 | 128.42 | 36 | 8  | 8 | Carbamidomethylation                | 22781  | PREDICTED: 40S ribosomal protein S5 [Vitis vinifera]                                |
| 456 | 282   | gi 731423943 | 127.32 | 38 | 6  | 2 | Carbamidomethylation                | 19961  | PREDICTED: 40S ribosomal protein S10 [Vitis vinifera]                               |
| 762 | 520   | gi 225431090 | 126.69 | 28 | 5  | 5 | Carbamidomethylation                | 27195  | PREDICTED: proteasome subunit alpha type-7 [Vitis vinifera]                         |
| 267 | 16846 | gi 552541026 | 126.68 | 11 | 10 | 9 | Carbamidomethylation                | 83146  | photosystem I P700 chlorophyll A apoprotein A1 (chloroplast) [Camellia yunnanensis] |
| 268 | 214   | gi 526117762 | 126.39 | 28 | 8  | 1 |                                     | 29376  | 14-3-3 protein [Vitis vinifera]                                                     |
| 84  | 955   | gi 225465423 | 126.36 | 9  | 6  | 6 | Carbamidomethylation                | 53142  | PREDICTED: uncharacterized protein LOC100251726 [Vitis vinifera]                    |
| 153 | 17213 | gi 224103243 | 126.34 | 18 | 5  | 1 | Carbamidomethylation                | 33816  | triosephosphate isomerase family protein [Populus trichocarpa]                      |
| 303 | 1727  | gi 225465837 | 126.18 | 6  | 3  | 2 | Carbamidomethylation                | 46787  | PREDICTED: protein ASPARTIC PROTEASE IN GUARD CELL 2 [Vitis vinifera]               |
| 265 | 17021 | gi 224083020 | 126.1  | 38 | 6  | 1 | Carbamidomethylation; Oxidation (M) | 18138  | Peptidyl-prolyl cis-trans isomerase family protein [Populus trichocarpa]            |
| 400 | 74    | gi 731393844 | 125.85 | 10 | 9  | 7 | Carbamidomethylation                | 101855 | PREDICTED: protein argonaute 4 [Vitis vinifera]                                     |

|     |       |              |        |    |   |   |                                     |        |                                                                                                                        |
|-----|-------|--------------|--------|----|---|---|-------------------------------------|--------|------------------------------------------------------------------------------------------------------------------------|
| 350 | 16889 | gi 566170533 | 125.16 | 12 | 5 | 5 |                                     | 47176  | hypothetical protein POPTR_0005s10290g [Populus trichocarpa]                                                           |
| 485 | 16530 | gi 566214279 | 124.61 | 27 | 9 | 9 | Carbamidomethylation                | 44682  | hypothetical protein POPTR_0018s04900g [Populus trichocarpa]                                                           |
| 402 | 108   | gi 526117643 | 124.38 | 11 | 9 | 5 |                                     | 101329 | heat shock protein 101 [Vitis vinifera]                                                                                |
| 201 | 217   | gi 225437428 | 124.38 | 7  | 6 | 1 | Carbamidomethylation                | 92483  | PREDICTED: sucrose synthase 2 [Vitis vinifera]                                                                         |
| 543 | 932   | gi 225450626 | 124.36 | 17 | 6 | 1 | Carbamidomethylation                | 39269  | PREDICTED: probable protein disulfide-isomerase A6 [Vitis vinifera]                                                    |
| 647 | 1175  | gi 359483879 | 123.97 | 15 | 5 | 1 | Carbamidomethylation                | 43617  | PREDICTED: LOW QUALITY PROTEIN: pyruvate dehydrogenase E1 component subunit beta-3 chloroplastic-like [Vitis vinifera] |
| 659 | 17029 | gi 566210440 | 123.75 | 15 | 5 | 5 | Carbamidomethylation                | 49767  | GDP dissociation inhibitor family protein [Populus trichocarpa]                                                        |
| 458 | 333   | gi 225447725 | 123.42 | 9  | 5 | 2 | Carbamidomethylation                | 61438  | PREDICTED: calnexin homolog [Vitis vinifera]                                                                           |
| 424 | 16940 | gi 566206623 | 123.27 | 8  | 5 | 1 | Carbamidomethylation                | 54072  | aldehyde dehydrogenase 1 precursor family protein [Populus trichocarpa]                                                |
| 875 | 71040 | gi 224072580 | 123.19 | 27 | 4 | 4 | Carbamidomethylation                | 29016  | chlorophyll a/b-binding protein type II precursor [Populus trichocarpa]                                                |
| 773 | 1012  | gi 225430650 | 122.83 | 16 | 5 | 1 | Carbamidomethylation; Oxidation (M) | 43927  | PREDICTED: pyruvate dehydrogenase E1 component subunit beta-3 chloroplastic [Vitis vinifera]                           |
| 642 | 572   | gi 731382516 | 122.67 | 14 | 4 | 4 |                                     | 37912  | PREDICTED: ankyrin repeat domain-containing protein 2 isoform X2 [Vitis vinifera]                                      |
| 251 | 969   | gi 225426753 | 122.67 | 9  | 6 | 2 | Oxidation (M)                       | 81719  | PREDICTED: primary amine oxidase [Vitis vinifera]                                                                      |
| 273 | 255   | gi 526117940 | 122.46 | 4  | 3 | 1 |                                     | 91805  | phospholipase D alpha [Vitis vinifera]                                                                                 |

|     |       |              |        |    |   |   |                                     |        |                                                                                     |
|-----|-------|--------------|--------|----|---|---|-------------------------------------|--------|-------------------------------------------------------------------------------------|
| 237 | 633   | gi 225444649 | 122.39 | 16 | 4 | 4 |                                     | 26396  | PREDICTED: 20 kDa chaperonin chloroplastic [Vitis vinifera]                         |
| 246 | 614   | gi 359493457 | 122.29 | 15 | 5 | 1 | Carbamidomethylation; Oxidation (M) | 48311  | PREDICTED: elongation factor 1-gamma [Vitis vinifera]                               |
| 385 | 17541 | gi 566196811 | 122.04 | 8  | 4 | 1 | Carbamidomethylation                | 62410  | hypothetical protein POPTR_0012s04670g [Populus trichocarpa]                        |
| 388 | 229   | gi 731427020 | 121.62 | 10 | 6 | 1 | Carbamidomethylation; Oxidation (M) | 76330  | PREDICTED: glycine--tRNA ligase 1 mitochondrial [Vitis vinifera]                    |
| 260 | 481   | gi 225442079 | 121.41 | 23 | 5 | 5 | Carbamidomethylation                | 27325  | PREDICTED: proteasome subunit alpha type-6 [Vitis vinifera]                         |
| 464 | 107   | gi 225452950 | 121.33 | 8  | 6 | 4 |                                     | 109834 | PREDICTED: chaperone protein ClpB3 chloroplastic [Vitis vinifera]                   |
| 142 | 859   | gi 225429614 | 121.05 | 26 | 3 | 2 |                                     | 17293  | PREDICTED: 17.3 kDa class II heat shock protein [Vitis vinifera]                    |
| 213 | 16790 | gi 566191383 | 120.83 | 10 | 5 | 1 | Carbamidomethylation                | 45066  | hypothetical protein POPTR_0010s17930g [Populus trichocarpa]                        |
| 368 | 301   | gi 225452510 | 120.71 | 9  | 6 | 1 | Carbamidomethylation                | 58057  | PREDICTED: aldehyde dehydrogenase family 2 member B7 mitochondrial [Vitis vinifera] |
| 510 | 598   | gi 225454009 | 120.7  | 12 | 6 | 1 | Carbamidomethylation                | 80666  | PREDICTED: transketolase chloroplastic [Vitis vinifera]                             |
| 428 | 16954 | gi 224076908 | 120.28 | 19 | 7 | 1 |                                     | 40750  | hypothetical protein POPTR_0004s06400g [Populus trichocarpa]                        |
| 479 | 661   | gi 225459564 | 119.66 | 13 | 3 | 3 |                                     | 28575  | PREDICTED: photosystem II 22 kDa protein chloroplastic [Vitis vinifera]             |
| 240 | 17330 | gi 566195299 | 119.15 | 39 | 4 | 1 |                                     | 13997  | histone H2A family protein [Populus trichocarpa]                                    |
| 257 | 17363 | gi 224109746 | 118.93 | 14 | 4 | 2 | Carbamidomethylation                | 26377  | putative chlorophyll a/b-binding family protein [Populus trichocarpa]               |

|     |       |              |        |    |   |   |                                        |        |                                                                                                  |
|-----|-------|--------------|--------|----|---|---|----------------------------------------|--------|--------------------------------------------------------------------------------------------------|
| 126 | 410   | gi 359475042 | 118.51 | 34 | 6 | 1 | Carbamidomethylation;<br>Oxidation (M) | 18313  | PREDICTED: peptidyl-prolyl<br>cis-trans isomerase [Vitis<br>vinifera]                            |
| 527 | 720   | gi 359476926 | 118.3  | 18 | 3 | 1 | Carbamidomethylation                   | 18454  | PREDICTED: photosystem I<br>reaction center subunit N<br>chloroplastic [Vitis vinifera]          |
| 703 | 1634  | gi 731413091 | 118.16 | 25 | 7 | 1 | Carbamidomethylation                   | 38789  | PREDICTED: UDP-glucuronic<br>acid decarboxylase 5 [Vitis<br>vinifera]                            |
| 433 | 541   | gi 225436900 | 117.88 | 19 | 7 | 1 |                                        | 47680  | PREDICTED: glutamine<br>synthetase leaf isozyme<br>chloroplastic [Vitis vinifera]                |
| 340 | 664   | gi 731403303 | 117.64 | 30 | 4 | 4 | Carbamidomethylation                   | 15026  | PREDICTED: 40S ribosomal<br>protein S12 [Vitis vinifera]                                         |
| 590 | 18948 | gi 566197644 | 117.61 | 15 | 5 | 4 | Carbamidomethylation                   | 26318  | hypothetical protein<br>POPTR_0012s09540g [Populus<br>trichocarpa]                               |
| 559 | 629   | gi 359492254 | 117.51 | 20 | 9 | 2 | Carbamidomethylation                   | 40876  | PREDICTED: ferredoxin--<br>NADP reductase leaf-type<br>isozyme chloroplastic [Vitis<br>vinifera] |
| 496 | 337   | gi 225423961 | 117.05 | 9  | 6 | 4 | Carbamidomethylation                   | 103148 | PREDICTED: alpha-xylosidase<br>1 [Vitis vinifera]                                                |
| 530 | 16811 | gi 566182073 | 116.85 | 30 | 6 | 6 |                                        | 15828  | hypothetical protein<br>POPTR_0008s03050g [Populus<br>trichocarpa]                               |
| 407 | 17819 | gi 224131818 | 116.14 | 22 | 3 | 1 |                                        | 28513  | chlorophyll a/b-binding family<br>protein [Populus trichocarpa]                                  |
| 282 | 16754 | gi 566176273 | 115.69 | 7  | 6 | 1 |                                        | 92143  | sucrose synthase family protein<br>[Populus trichocarpa]                                         |
| 550 | 156   | gi 225441236 | 115.42 | 3  | 4 | 2 |                                        | 177678 | PREDICTED: ferredoxin-<br>dependent glutamate synthase<br>chloroplastic [Vitis vinifera]         |
| 317 | 17234 | gi 566207041 | 115.24 | 12 | 4 | 2 | Carbamidomethylation                   | 53652  | glutamate 1-semialdehyde<br>aminotransferase family protein<br>[Populus trichocarpa]             |
| 421 | 18346 | gi 566184549 | 115.23 | 26 | 6 | 2 | Carbamidomethylation                   | 29191  | 20S proteasome beta subunit<br>family protein [Populus<br>trichocarpa]                           |

|     |       |              |        |    |   |   |                                     |       |                                                                                          |
|-----|-------|--------------|--------|----|---|---|-------------------------------------|-------|------------------------------------------------------------------------------------------|
| 366 | 17320 | gi 566189392 | 115.04 | 18 | 5 | 5 |                                     | 27258 | hypothetical protein POPTR_0010s06320g [Populus trichocarpa]                             |
| 346 | 663   | gi 225449052 | 114.65 | 29 | 4 | 4 |                                     | 17824 | PREDICTED: 60S ribosomal protein L12 [Vitis vinifera]                                    |
| 728 | 551   | gi 731440696 | 114.43 | 10 | 6 | 3 |                                     | 64402 | PREDICTED: hsp70-Hsp90 organizing protein 3-like [Vitis vinifera]                        |
| 868 | 17422 | gi 552540940 | 114.09 | 9  | 4 | 4 |                                     | 58361 | acetyl-CoA carboxylase carboxyl transferase beta (chloroplast) [Camellia impressinervis] |
| 556 | 16998 | gi 566156890 | 114.02 | 13 | 5 | 2 |                                     | 44077 | hypothetical protein POPTR_0002s08240g [Populus trichocarpa]                             |
| 537 | 17442 | gi 566152994 | 113.95 | 15 | 7 | 2 | Carbamidomethylation                | 57135 | hypothetical protein POPTR_0001s35790g [Populus trichocarpa]                             |
| 311 | 216   | gi 526117840 | 113.09 | 11 | 7 | 1 |                                     | 58698 | 3-deoxy-D-arabino-heptulosonate-7-phosphate synthase [Vitis vinifera]                    |
| 297 | 602   | gi 359476682 | 112.85 | 20 | 4 | 2 | Carbamidomethylation; Oxidation (M) | 24349 | PREDICTED: soluble inorganic pyrophosphatase isoform X2 [Vitis vinifera]                 |
| 455 | 17820 | gi 566175251 | 112.65 | 7  | 3 | 3 |                                     | 34569 | hypothetical protein POPTR_0006s08710g [Populus trichocarpa]                             |
| 457 | 16901 | gi 224102579 | 112.36 | 16 | 7 | 2 |                                     | 47747 | glutamine synthetase family protein [Populus trichocarpa]                                |
| 391 | 692   | gi 731388721 | 112.17 | 23 | 4 | 2 |                                     | 18965 | PREDICTED: translationally-controlled tumor protein homolog [Vitis vinifera]             |
| 216 | 18507 | gi 566242200 | 112.12 | 14 | 4 | 2 |                                     | 19093 | hypothetical protein POPTR_0019s12370g partial [Populus trichocarpa]                     |
| 765 | 29329 | gi 224141875 | 112.09 | 18 | 3 | 3 | Carbamidomethylation                | 16908 | zinc finger family protein [Populus trichocarpa]                                         |
| 449 | 1514  | gi 225450791 | 111.48 | 20 | 3 | 1 |                                     | 22379 | PREDICTED: translationally-controlled tumor protein homolog [Vitis vinifera]             |

|     |       |              |        |    |   |   |                      |       |                                                                                         |
|-----|-------|--------------|--------|----|---|---|----------------------|-------|-----------------------------------------------------------------------------------------|
| 442 | 17944 | gi 224093408 | 111.26 | 17 | 3 | 1 | Carbamidomethylation | 18464 | hypothetical protein POPTR_0007s04160g [Populus trichocarpa]                            |
| 785 | 473   | gi 225436253 | 111.14 | 9  | 5 | 1 | Carbamidomethylation | 66904 | PREDICTED: probable methylenetetrahydrofolate reductase [Vitis vinifera]                |
| 630 | 17915 | gi 224131676 | 110.82 | 38 | 4 | 2 | Carbamidomethylation | 11636 | Ubiquitin-like family protein [Populus trichocarpa]                                     |
| 470 | 17056 | gi 224110900 | 110.37 | 12 | 5 | 1 | Carbamidomethylation | 53476 | hypothetical protein POPTR_0010s05530g [Populus trichocarpa]                            |
| 255 | 17194 | gi 566181525 | 109.84 | 13 | 6 | 1 |                      | 42160 | hypothetical protein POPTR_0008s00350g [Populus trichocarpa]                            |
| 640 | 636   | gi 731387895 | 109.81 | 9  | 4 | 1 | Carbamidomethylation | 51263 | PREDICTED: UTP--glucose-1-phosphate uridylyltransferase isoform X2 [Vitis vinifera]     |
| 521 | 16879 | gi 224059184 | 109.72 | 7  | 4 | 2 |                      | 91823 | phospholipase D family protein [Populus trichocarpa]                                    |
| 121 | 899   | gi 225431269 | 108.6  | 10 | 3 | 2 | Carbamidomethylation | 36580 | PREDICTED: peroxidase 72 [Vitis vinifera]                                               |
| 397 | 832   | gi 225461287 | 108.14 | 20 | 3 | 3 | Carbamidomethylation | 24076 | PREDICTED: cytochrome b6-f complex iron-sulfur subunit 1 chloroplastic [Vitis vinifera] |
| 380 | 17232 | gi 566169561 | 107.86 | 13 | 3 | 1 |                      | 34208 | hypothetical protein POPTR_0005s05040g [Populus trichocarpa]                            |
| 360 | 17598 | gi 566158065 | 107.84 | 11 | 4 | 1 |                      | 37108 | arginase family protein [Populus trichocarpa]                                           |
| 296 | 16672 | gi 566203657 | 107.37 | 12 | 5 | 3 | Carbamidomethylation | 56866 | hypothetical protein POPTR_0014s10800g [Populus trichocarpa]                            |
| 436 | 746   | gi 225447041 | 107.37 | 8  | 4 | 2 | Carbamidomethylation | 60008 | PREDICTED: L-ascorbate oxidase homolog [Vitis vinifera]                                 |
| 564 | 1208  | gi 225424530 | 106.81 | 22 | 5 | 5 |                      | 36021 | PREDICTED: eukaryotic translation initiation factor 3 subunit I [Vitis vinifera]        |

|     |       |              |        |    |   |   |                      |       |                                                                                                   |
|-----|-------|--------------|--------|----|---|---|----------------------|-------|---------------------------------------------------------------------------------------------------|
| 900 | 447   | gi 359494836 | 106.76 | 6  | 3 | 3 | Carbamidomethylation | 61508 | PREDICTED: pyrophosphate--fructose 6-phosphate 1-phosphotransferase subunit beta [Vitis vinifera] |
| 332 | 829   | gi 225436257 | 106.64 | 12 | 3 | 3 |                      | 29530 | PREDICTED: chlorophyll a-b binding protein 8 chloroplastic [Vitis vinifera]                       |
| 730 | 785   | gi 225459806 | 106.57 | 10 | 6 | 1 | Carbamidomethylation | 57322 | PREDICTED: T-complex protein 1 subunit beta [Vitis vinifera]                                      |
| 330 | 17266 | gi 224104631 | 106.48 | 13 | 3 | 1 |                      | 27319 | cytosolic ascorbate peroxidase family protein [Populus trichocarpa]                               |
| 598 | 140   | gi 359475304 | 106.4  | 6  | 5 | 5 | Carbamidomethylation | 98624 | PREDICTED: coatomer subunit gamma-2 [Vitis vinifera]                                              |
| 691 | 16870 | gi 224092216 | 106.17 | 7  | 3 | 3 | Carbamidomethylation | 57364 | glycine hydroxymethyltransferase family protein [Populus trichocarpa]                             |
| 700 | 17127 | gi 566149354 | 106.06 | 21 | 5 | 5 |                      | 26031 | Proteasome subunit alpha type 5-1 family protein [Populus trichocarpa]                            |
| 116 | 17575 | gi 566170929 | 106.05 | 10 | 3 | 1 | Carbamidomethylation | 36394 | hypothetical protein POPTR_0005s12070g [Populus trichocarpa]                                      |
| 173 | 17181 | gi 566259890 | 105.93 | 11 | 8 | 3 |                      | 48155 | elongation factor 1-gamma 1 family protein [Populus trichocarpa]                                  |
| 223 | 238   | gi 359481634 | 105.84 | 33 | 5 | 2 |                      | 16594 | PREDICTED: ubiquitin-conjugating enzyme E2 variant 1D [Vitis vinifera]                            |
| 653 | 727   | gi 225464809 | 105.45 | 9  | 4 | 1 | Carbamidomethylation | 56995 | PREDICTED: gamma aminobutyrate transaminase 1 mitochondrial-like [Vitis vinifera]                 |
| 509 | 18144 | gi 224073967 | 105.33 | 13 | 3 | 3 |                      | 15188 | photosystem I 11K family protein [Populus trichocarpa]                                            |
| 788 | 411   | gi 359497202 | 105.28 | 7  | 4 | 4 | Carbamidomethylation | 60614 | PREDICTED: T-complex protein 1 subunit eta [Vitis vinifera]                                       |



|      |       |              |        |    |   |   |                                     |       |                                                                                                    |
|------|-------|--------------|--------|----|---|---|-------------------------------------|-------|----------------------------------------------------------------------------------------------------|
| 1040 | 311   | gi 225430390 | 105.09 | 9  | 3 | 3 |                                     | 57260 | PREDICTED: threonine synthase chloroplastic [Vitis vinifera]                                       |
| 648  | 223   | gi 225429530 | 105.07 | 8  | 4 | 4 |                                     | 54362 | PREDICTED: UDP-sulfoquinovose synthase chloroplastic [Vitis vinifera]                              |
| 351  | 1330  | gi 225426512 | 104.96 | 14 | 3 | 1 | Carbamidomethylation                | 24384 | PREDICTED: soluble inorganic pyrophosphatase [Vitis vinifera]                                      |
| 541  | 17258 | gi 224140177 | 104.87 | 7  | 5 | 2 | Carbamidomethylation                | 53698 | adenylosuccinate synthetase family protein [Populus trichocarpa]                                   |
| 636  | 321   | gi 225457058 | 104.76 | 8  | 4 | 1 | Carbamidomethylation                | 60477 | PREDICTED: T-complex protein 1 subunit gamma [Vitis vinifera]                                      |
| 688  | 17046 | gi 224085984 | 104.62 | 10 | 5 | 1 | Carbamidomethylation                | 61382 | multi-copper oxidase type 1 family protein [Populus trichocarpa]                                   |
| 71   | 736   | gi 225455934 | 104.51 | 19 | 5 | 5 | Carbamidomethylation; Oxidation (M) | 20429 | PREDICTED: ribulose biphosphate carboxylase small chain chloroplastic [Vitis vinifera]             |
| 569  | 17223 | gi 224139104 | 104.41 | 10 | 3 | 3 | Carbamidomethylation                | 33044 | pyridoxin biosynthesis PDX1-like protein 3 [Populus trichocarpa]                                   |
| 553  | 750   | gi 225457502 | 104.23 | 7  | 2 | 2 |                                     | 35357 | PREDICTED: probable succinyl-CoA ligase [ADP-forming] subunit alpha mitochondrial [Vitis vinifera] |
| 357  | 658   | gi 731392450 | 104.19 | 12 | 4 | 1 | Carbamidomethylation                | 27557 | PREDICTED: L-ascorbate peroxidase 2 cytosolic [Vitis vinifera]                                     |
| 392  | 2170  | gi 225425388 | 104.13 | 30 | 2 | 2 |                                     | 13594 | PREDICTED: nuclear transport factor 2 [Vitis vinifera]                                             |
| 677  | 17917 | gi 566206287 | 103.95 | 15 | 4 | 1 |                                     | 35464 | ATP synthase gamma chain family protein [Populus trichocarpa]                                      |
| 753  | 699   | gi 225435309 | 103.87 | 6  | 5 | 2 | Carbamidomethylation                | 82345 | PREDICTED: 4-hydroxy-3-methylbut-2-en-1-yl diphosphate synthase chloroplastic [Vitis vinifera]     |

|     |       |              |        |    |   |   |                                     |        |                                                                                               |
|-----|-------|--------------|--------|----|---|---|-------------------------------------|--------|-----------------------------------------------------------------------------------------------|
| 683 | 721   | gi 225429209 | 103.76 | 7  | 4 | 3 |                                     | 53142  | PREDICTED: serine carboxypeptidase-like 16 [Vitis vinifera]                                   |
| 378 | 811   | gi 225456404 | 103.56 | 9  | 3 | 1 | Carbamidomethylation                | 50437  | PREDICTED: glutamate-1-semialdehyde 2 1-aminomutase chloroplastic [Vitis vinifera]            |
| 758 | 3000  | gi 225453620 | 103.25 | 7  | 2 | 2 | Carbamidomethylation; Oxidation (M) | 47761  | PREDICTED: pyruvate dehydrogenase E1 component subunit alpha-3 chloroplastic [Vitis vinifera] |
| 605 | 1222  | gi 225457219 | 102.87 | 13 | 4 | 1 | Carbamidomethylation                | 35220  | PREDICTED: ATP synthase subunit gamma mitochondrial [Vitis vinifera]                          |
| 377 | 18002 | gi 566185685 | 102.49 | 14 | 3 | 3 | Carbamidomethylation                | 22408  | hypothetical protein POPTR_0009s01050g [Populus trichocarpa]                                  |
| 524 | 16560 | gi 566206267 | 102.44 | 5  | 5 | 1 |                                     | 100324 | hypothetical protein POPTR_0015s06760g [Populus trichocarpa]                                  |
| 465 | 792   | gi 225465764 | 102.43 | 13 | 4 | 4 | Carbamidomethylation                | 43403  | PREDICTED: UDP-D-apiiose/UDP-D-xylose synthase 2 [Vitis vinifera]                             |
| 476 | 293   | gi 225455784 | 102.38 | 12 | 4 | 3 | Carbamidomethylation                | 50558  | PREDICTED: enolase 1 chloroplastic [Vitis vinifera]                                           |
| 467 | 18849 | gi 224065507 | 102.35 | 19 | 2 | 1 |                                     | 15080  | Photosystem I reaction center subunit IV A family protein [Populus trichocarpa]               |
| 506 | 218   | gi 731395250 | 102.3  | 11 | 4 | 1 | Carbamidomethylation                | 48931  | PREDICTED: elongation factor Tu mitochondrial [Vitis vinifera]                                |
| 832 | 19656 | gi 566169467 | 102.2  | 17 | 2 | 1 |                                     | 13987  | hypothetical protein POPTR_0005s04590g [Populus trichocarpa]                                  |
| 856 | 325   | gi 225456051 | 102.08 | 9  | 4 | 2 | Carbamidomethylation                | 57589  | PREDICTED: T-complex protein 1 subunit delta [Vitis vinifera]                                 |
| 627 | 2319  | gi 225452270 | 101.95 | 12 | 4 | 2 |                                     | 34598  | PREDICTED: 28 kDa ribonucleoprotein chloroplastic-like [Vitis vinifera]                       |

|     |       |              |        |    |   |   |                      |        |                                                                                                                                     |
|-----|-------|--------------|--------|----|---|---|----------------------|--------|-------------------------------------------------------------------------------------------------------------------------------------|
| 673 | 16821 | gi 566215982 | 101.86 | 8  | 4 | 1 | Carbamidomethylation | 60519  | hypothetical protein<br>POPTR_0019s00210g [Populus<br>trichocarpa]                                                                  |
| 408 | 547   | gi 225456295 | 101.84 | 20 | 5 | 3 |                      | 24961  | PREDICTED: elongation factor<br>1-delta [Vitis vinifera]                                                                            |
| 419 | 953   | gi 526118138 | 101.82 | 17 | 4 | 4 |                      | 33840  | uncharacterized protein<br>LOC100264250 [Vitis vinifera]                                                                            |
| 337 | 17014 | gi 224140653 | 101.8  | 7  | 4 | 1 |                      | 61182  | phosphoglycerate mutase family<br>protein [Populus trichocarpa]                                                                     |
| 784 | 1243  | gi 225438781 | 101.74 | 7  | 3 | 1 | Carbamidomethylation | 71362  | PREDICTED: polyadenylate-<br>binding protein 2 [Vitis vinifera]                                                                     |
| 477 | 962   | gi 225447723 | 101.57 | 3  | 4 | 2 |                      | 109436 | PREDICTED: staphylococcal<br>nuclease domain-containing<br>protein 1 [Vitis vinifera]                                               |
| 322 | 703   | gi 731388929 | 101.27 | 11 | 5 | 2 | Carbamidomethylation | 56541  | PREDICTED: bifunctional 3-<br>dehydroquinase<br>dehydratase/shikimate<br>dehydrogenase chloroplastic<br>isoform X2 [Vitis vinifera] |
| 600 | 1620  | gi 225433918 | 101.14 | 6  | 2 | 1 |                      | 35199  | PREDICTED: probable<br>fructokinase-4 [Vitis vinifera]                                                                              |
| 261 | 578   | gi 225436841 | 100.94 | 38 | 4 | 1 |                      | 14393  | PREDICTED: histone H2AX<br>[Vitis vinifera]                                                                                         |
| 417 | 731   | gi 225449971 | 100.9  | 4  | 4 | 4 |                      | 121958 | PREDICTED: protein transport<br>protein SEC31 homolog B<br>isoform X2 [Vitis vinifera]                                              |
| 602 | 979   | gi 731416996 | 100.76 | 9  | 4 | 4 |                      | 46827  | PREDICTED: poly(rC)-binding<br>protein 3 [Vitis vinifera]                                                                           |
| 502 | 1529  | gi 225432466 | 100.68 | 17 | 2 | 2 | Carbamidomethylation | 18476  | PREDICTED: peptide<br>methionine sulfoxide reductase<br>B5-like [Vitis vinifera]                                                    |
| 609 | 17949 | gi 224132216 | 100.42 | 31 | 3 | 1 | Carbamidomethylation | 11688  | hypothetical protein<br>POPTR_0014s18990g [Populus<br>trichocarpa]                                                                  |
| 621 | 18654 | gi 224053535 | 100.22 | 12 | 3 | 1 |                      | 38585  | pyruvate dehydrogenase family<br>protein [Populus trichocarpa]                                                                      |
| 872 | 17257 | gi 224108938 | 100.14 | 42 | 5 | 1 | Carbamidomethylation | 17381  | hypothetical protein<br>POPTR_0010s17020g [Populus<br>trichocarpa]                                                                  |

|      |       |              |       |    |   |   |                      |       |                                                                                                    |
|------|-------|--------------|-------|----|---|---|----------------------|-------|----------------------------------------------------------------------------------------------------|
| 551  | 18232 | gi 566187006 | 99.99 | 8  | 3 | 2 |                      | 50172 | hypothetical protein POPTR_0009s08570g [Populus trichocarpa]                                       |
| 1064 | 17962 | gi 359476900 | 99.98 | 10 | 3 | 1 |                      | 40711 | PREDICTED: isocitrate dehydrogenase [NAD] regulatory subunit 1 mitochondrial-like [Vitis vinifera] |
| 869  | 17523 | gi 224107106 | 99.81 | 5  | 2 | 2 |                      | 79571 | MULTIFUNCTIONAL family protein [Populus trichocarpa]                                               |
| 395  | 17243 | gi 224100839 | 99.71 | 24 | 4 | 4 |                      | 19919 | ATP synthase D chain-related family protein [Populus trichocarpa]                                  |
| 849  | 17738 | gi 224066507 | 99.61 | 9  | 4 | 3 | Carbamidomethylation | 43683 | mRNA-binding family protein [Populus trichocarpa]                                                  |
| 531  | 1029  | gi 359473645 | 99.58 | 6  | 5 | 3 | Carbamidomethylation | 66079 | PREDICTED: chaperonin 60 subunit beta 4 chloroplastic [Vitis vinifera]                             |
| 733  | 231   | gi 225450275 | 99.57 | 18 | 5 | 3 | Carbamidomethylation | 35771 | PREDICTED: serine/threonine-protein phosphatase PP2A-2 catalytic subunit [Vitis vinifera]          |
| 308  | 17233 | gi 224065421 | 99.5  | 6  | 4 | 1 |                      | 64078 | hypothetical protein POPTR_0002s24970g [Populus trichocarpa]                                       |
| 588  | 17873 | gi 224058705 | 99.37 | 21 | 2 | 2 | Carbamidomethylation | 18641 | cytochrome c oxidase-related family protein [Populus trichocarpa]                                  |
| 921  | 326   | gi 359492510 | 99.32 | 7  | 3 | 1 |                      | 41451 | PREDICTED: probable L-ascorbate peroxidase 6 chloroplastic isoform X2 [Vitis vinifera]             |
| 694  | 312   | gi 225428247 | 99.2  | 10 | 5 | 1 | Carbamidomethylation | 60225 | PREDICTED: L-ascorbate oxidase homolog [Vitis vinifera]                                            |
| 429  | 30216 | gi 566168757 | 99.13 | 11 | 4 | 2 |                      | 42533 | hypothetical protein POPTR_0005s01370g [Populus trichocarpa]                                       |
| 591  | 18711 | gi 224128708 | 99.07 | 12 | 3 | 3 |                      | 33828 | xyloglucan endo-1 family protein [Populus trichocarpa]                                             |

|     |       |              |       |    |   |   |                      |        |                                                                                      |
|-----|-------|--------------|-------|----|---|---|----------------------|--------|--------------------------------------------------------------------------------------|
| 500 | 17495 | gi 224122692 | 98.94 | 16 | 4 | 4 |                      | 25625  | Proteasome subunit alpha type 2 family protein [Populus trichocarpa]                 |
| 717 | 606   | gi 731438689 | 98.88 | 13 | 5 | 5 |                      | 44313  | PREDICTED: FAM10 family protein At4g22670 [Vitis vinifera]                           |
| 566 | 17264 | gi 224121954 | 98.83 | 15 | 3 | 2 |                      | 26774  | hypothetical protein POPTR_0012s09720g [Populus trichocarpa]                         |
| 382 | 887   | gi 359479647 | 98.79 | 24 | 5 | 5 | Carbamidomethylation | 22491  | PREDICTED: proteasome subunit beta type-2-A [Vitis vinifera]                         |
| 990 | 875   | gi 225452831 | 98.56 | 11 | 4 | 3 |                      | 43750  | PREDICTED: malate dehydrogenase chloroplastic-like [Vitis vinifera]                  |
| 601 | 247   | gi 225452974 | 98.32 | 11 | 5 | 3 |                      | 58482  | PREDICTED: probable mitochondrial-processing peptidase subunit beta [Vitis vinifera] |
| 675 | 18119 | gi 224063066 | 98.16 | 8  | 4 | 1 | Carbamidomethylation | 56188  | disulfide-isomerase family protein [Populus trichocarpa]                             |
| 315 | 17196 | gi 224121218 | 98.14 | 12 | 4 | 4 | Carbamidomethylation | 36046  | GTP-binding protein beta chain [Populus trichocarpa]                                 |
| 704 | 17528 | gi 566162704 | 97.83 | 20 | 3 | 2 |                      | 18629  | hypothetical protein POPTR_0003s14870g [Populus trichocarpa]                         |
| 526 | 17210 | gi 224136368 | 97.77 | 4  | 4 | 2 |                      | 107885 | 110 kDa 4SNc-Tudor domain family protein [Populus trichocarpa]                       |
| 352 | 729   | gi 731421236 | 97.65 | 11 | 4 | 1 |                      | 37446  | PREDICTED: arginase 1 mitochondrial [Vitis vinifera]                                 |
| 980 | 155   | gi 225446449 | 97.53 | 7  | 5 | 2 |                      | 97503  | PREDICTED: 26S proteasome non-ATPase regulatory subunit 2 homolog A [Vitis vinifera] |
| 782 | 545   | gi 526117441 | 97.47 | 4  | 4 | 1 |                      | 101670 | lipoxygenase [Vitis vinifera]                                                        |
| 616 | 762   | gi 225448367 | 97.35 | 10 | 3 | 3 |                      | 34281  | PREDICTED: 60S acidic ribosomal protein P0 [Vitis vinifera]                          |

|     |       |              |       |    |   |   |                      |        |                                                                                                           |
|-----|-------|--------------|-------|----|---|---|----------------------|--------|-----------------------------------------------------------------------------------------------------------|
| 643 | 363   | gi 225464852 | 97.25 | 43 | 5 | 2 |                      | 16577  | PREDICTED: ubiquitin-conjugating enzyme E2 variant 1D [Vitis vinifera]                                    |
| 555 | 424   | gi 225428772 | 97.24 | 3  | 3 | 1 |                      | 121098 | PREDICTED: presequence protease 2 chloroplastic/mitochondrial-like [Vitis vinifera]                       |
| 511 | 18516 | gi 224104953 | 97.04 | 5  | 3 | 1 |                      | 68350  | beta-D-glucan exohydrolase family protein [Populus trichocarpa]                                           |
| 468 | 1587  | gi 225453350 | 96.64 | 21 | 3 | 2 |                      | 16310  | PREDICTED: nucleoside diphosphate kinase B [Vitis vinifera]                                               |
| 582 | 866   | gi 225425304 | 96.52 | 44 | 3 | 3 | Carbamidomethylation | 9611   | PREDICTED: 40S ribosomal protein S27-2 [Vitis vinifera]                                                   |
| 618 | 192   | gi 225434712 | 96.47 | 21 | 6 | 1 |                      | 29576  | PREDICTED: proliferating cell nuclear antigen [Vitis vinifera]                                            |
| 767 | 17277 | gi 566170863 | 96.36 | 33 | 3 | 3 |                      | 11409  | histone H4 family protein [Populus trichocarpa]                                                           |
| 578 | 16779 | gi 566175799 | 96.1  | 10 | 6 | 3 | Carbamidomethylation | 57465  | pyruvate kinase family protein [Populus trichocarpa]                                                      |
| 813 | 18442 | gi 224100797 | 95.84 | 12 | 4 | 2 | Carbamidomethylation | 26417  | putative chlorophyll a/b-binding family protein [Populus trichocarpa]                                     |
| 289 | 807   | gi 225461209 | 95.4  | 17 | 3 | 3 | Oxidation (M)        | 21740  | PREDICTED: NAD(P)H dehydrogenase (quinone) FQR1 [Vitis vinifera]                                          |
| 314 | 226   | gi 359497288 | 95.35 | 7  | 4 | 1 | Carbamidomethylation | 64041  | PREDICTED: peptidyl-prolyl cis-trans isomerase FKBP62 isoform X1 [Vitis vinifera]                         |
| 420 | 1290  | gi 225453909 | 94.85 | 17 | 3 | 3 | Carbamidomethylation | 24628  | PREDICTED: proteasome subunit beta type-1 [Vitis vinifera]                                                |
| 943 | 593   | gi 731412938 | 94.74 | 3  | 4 | 1 | Carbamidomethylation | 155024 | PREDICTED: probable phosphoribosylformylglycinamide synthase chloroplastic/mitochondrial [Vitis vinifera] |

|     |       |              |       |    |   |   |                      |       |                                                                                              |
|-----|-------|--------------|-------|----|---|---|----------------------|-------|----------------------------------------------------------------------------------------------|
| 486 | 17370 | gi 566192956 | 94.61 | 10 | 4 | 1 | Carbamidomethylation | 44225 | hypothetical protein POPTR_0011s00650g [Populus trichocarpa]                                 |
| 328 | 17211 | gi 224135485 | 94.61 | 6  | 4 | 1 | Carbamidomethylation | 58870 | glycosyl hydrolase family 1 family protein [Populus trichocarpa]                             |
| 935 | 17344 | gi 224125422 | 94.36 | 6  | 3 | 2 | Carbamidomethylation | 56543 | hypothetical protein POPTR_0013s03070g [Populus trichocarpa]                                 |
| 635 | 16938 | gi 224145979 | 94.18 | 9  | 4 | 4 | Carbamidomethylation | 58735 | hypothetical protein POPTR_0019s04980g [Populus trichocarpa]                                 |
| 538 | 1552  | gi 359495476 | 94.05 | 23 | 5 | 1 |                      | 29035 | PREDICTED: chlorophyll a-b binding protein 13 chloroplastic [Vitis vinifera]                 |
| 817 | 17391 | gi 566182904 | 93.84 | 6  | 3 | 3 |                      | 59760 | hypothetical protein POPTR_0008s07890g [Populus trichocarpa]                                 |
| 617 | 1238  | gi 225425166 | 93.83 | 12 | 3 | 1 |                      | 39489 | PREDICTED: pyruvate dehydrogenase E1 component subunit beta-1 mitochondrial [Vitis vinifera] |
| 904 | 458   | gi 359475502 | 93.8  | 11 | 4 | 2 | Carbamidomethylation | 37652 | PREDICTED: malate dehydrogenase glyoxysomal [Vitis vinifera]                                 |
| 597 | 336   | gi 225429870 | 93.39 | 9  | 6 | 6 | Carbamidomethylation | 60861 | PREDICTED: aspartate--tRNA ligase cytoplasmic [Vitis vinifera]                               |
| 561 | 685   | gi 225459808 | 93.33 | 6  | 4 | 1 |                      | 60137 | PREDICTED: L-ascorbate oxidase homolog [Vitis vinifera]                                      |
| 650 | 1650  | gi 225439520 | 93.25 | 6  | 4 | 2 |                      | 65247 | PREDICTED: pyruvate decarboxylase 2 [Vitis vinifera]                                         |
| 769 | 17256 | gi 224125002 | 93.15 | 5  | 2 | 1 | Carbamidomethylation | 59410 | importin alpha-1 subunit family protein [Populus trichocarpa]                                |
| 652 | 17008 | gi 566186274 | 92.41 | 17 | 6 | 1 |                      | 29153 | proliferating cell nuclear antigen family protein [Populus trichocarpa]                      |

|      |       |              |       |    |   |   |                      |       |                                                                                                                                                       |
|------|-------|--------------|-------|----|---|---|----------------------|-------|-------------------------------------------------------------------------------------------------------------------------------------------------------|
| 570  | 17814 | gi 566177370 | 92.33 | 7  | 4 | 1 |                      | 60158 | DEAD box RNA helicase family protein [Populus trichocarpa]                                                                                            |
| 764  | 1353  | gi 225428047 | 92.29 | 24 | 4 | 3 | Carbamidomethylation | 17518 | PREDICTED: SKP1-like protein 1A isoform X5 [Vitis vinifera]                                                                                           |
| 523  | 417   | gi 225429850 | 92.08 | 17 | 3 | 1 |                      | 24915 | PREDICTED: proteasome subunit beta type-6 [Vitis vinifera]                                                                                            |
| 984  | 17804 | gi 566168414 | 92.01 | 10 | 3 | 1 |                      | 34495 | quinone oxidoreductase-like family protein [Populus trichocarpa]                                                                                      |
| 430  | 16793 | gi 566186880 | 91.89 | 4  | 4 | 3 | Carbamidomethylation | 99572 | ubiquitin activating enzyme 2 family protein [Populus trichocarpa]                                                                                    |
| 701  | 17124 | gi 566259876 | 91.78 | 14 | 3 | 1 |                      | 23976 | hypothetical protein POPTR_0022s00350g [Populus trichocarpa]                                                                                          |
| 680  | 639   | gi 731428049 | 91.68 | 9  | 3 | 2 | Carbamidomethylation | 47334 | PREDICTED: delta-aminolevulinic acid dehydratase chloroplastic [Vitis vinifera]                                                                       |
| 1025 | 597   | gi 225441924 | 91.22 | 7  | 2 | 1 | Carbamidomethylation | 51126 | PREDICTED: eukaryotic translation initiation factor 3 subunit E [Vitis vinifera]                                                                      |
| 603  | 1324  | gi 526117872 | 91.21 | 14 | 3 | 3 |                      | 25310 | manganese superoxide dismutase [Vitis vinifera]                                                                                                       |
| 490  | 566   | gi 731407251 | 91.09 | 3  | 3 | 1 |                      | 92866 | PREDICTED: phospholipase D alpha 1-like [Vitis vinifera]                                                                                              |
| 807  | 592   | gi 225437537 | 90.97 | 18 | 3 | 3 |                      | 22019 | PREDICTED: GTP-binding protein SAR1A [Vitis vinifera]                                                                                                 |
| 361  | 902   | gi 225461808 | 90.93 | 8  | 4 | 1 |                      | 75747 | PREDICTED: trifunctional UDP-glucose 4 6-dehydratase/UDP-4-keto-6-deoxy-D-glucose 3 5-epimerase/UDP-4-keto-L-rhamnose-reductase RHM1 [Vitis vinifera] |
| 599  | 17503 | gi 566165056 | 90.92 | 14 | 4 | 1 | Carbamidomethylation | 36365 | hypothetical protein POPTR_0004s05340g [Populus trichocarpa]                                                                                          |



|     |       |              |       |    |   |   |                      |        |                                                                                             |
|-----|-------|--------------|-------|----|---|---|----------------------|--------|---------------------------------------------------------------------------------------------|
| 698 | 16798 | gi 566149322 | 90.9  | 4  | 4 | 1 |                      | 105097 | putative plasma membrane H <sup>+</sup> -ATPase family protein [Populus trichocarpa]        |
| 499 | 1322  | gi 225424805 | 90.72 | 10 | 4 | 1 | Carbamidomethylation | 43702  | PREDICTED: pyruvate dehydrogenase E1 component subunit alpha mitochondrial [Vitis vinifera] |
| 842 | 17635 | gi 224092266 | 90.59 | 6  | 3 | 3 | Carbamidomethylation | 63096  | hypothetical protein POPTR_0006s25280g [Populus trichocarpa]                                |
| 463 | 1011  | gi 225435878 | 90.49 | 28 | 3 | 2 |                      | 10567  | PREDICTED: 10 kDa chaperonin [Vitis vinifera]                                               |
| 815 | 71046 | gi 224129046 | 90.46 | 9  | 2 | 1 | Carbamidomethylation | 36161  | 1-aminocyclopropane-1-carboxylate oxidase family protein [Populus trichocarpa]              |
| 372 | 1653  | gi 225429975 | 90.46 | 8  | 3 | 2 |                      | 39098  | PREDICTED: bark storage protein A [Vitis vinifera]                                          |
| 353 | 1023  | gi 731392188 | 90.44 | 15 | 3 | 1 | Carbamidomethylation | 23071  | PREDICTED: triosephosphate isomerase cytosolic isoform X2 [Vitis vinifera]                  |
| 737 | 1518  | gi 225440290 | 90.3  | 38 | 4 | 3 | Carbamidomethylation | 16532  | PREDICTED: ubiquitin-conjugating enzyme E2-17 kDa [Vitis vinifera]                          |
| 612 | 17490 | gi 224137858 | 90.3  | 13 | 4 | 1 |                      | 41555  | hypothetical protein POPTR_0016s04600g [Populus trichocarpa]                                |
| 481 | 987   | gi 731411833 | 90.21 | 9  | 2 | 2 | Carbamidomethylation | 35859  | PREDICTED: nitrilase-like protein 2 [Vitis vinifera]                                        |
| 501 | 804   | gi 225460542 | 89.97 | 10 | 3 | 1 |                      | 36331  | PREDICTED: heterogeneous nuclear ribonucleoprotein 1 [Vitis vinifera]                       |
| 655 | 17270 | gi 566147298 | 89.75 | 9  | 4 | 1 |                      | 41639  | ENOYL-ACP REDUCTASE 1 family protein [Populus trichocarpa]                                  |
| 742 | 17315 | gi 224079274 | 89.54 | 12 | 4 | 4 |                      | 41124  | ubiquitin family protein [Populus trichocarpa]                                              |
| 199 | 1532  | gi 225460502 | 89.44 | 4  | 2 | 1 | Carbamidomethylation | 64083  | PREDICTED: laccase-14 [Vitis vinifera]                                                      |

|     |       |              |       |    |   |   |                      |        |                                                                                               |
|-----|-------|--------------|-------|----|---|---|----------------------|--------|-----------------------------------------------------------------------------------------------|
| 991 | 17699 | gi 566174515 | 89.16 | 4  | 3 | 3 |                      | 80466  | hypothetical protein POPTR_0006s04870g [Populus trichocarpa]                                  |
| 634 | 16961 | gi 566166593 | 89.03 | 3  | 3 | 1 |                      | 122467 | hypothetical protein POPTR_0004s14960g [Populus trichocarpa]                                  |
| 633 | 17228 | gi 224103569 | 88.92 | 4  | 3 | 1 |                      | 112946 | hypothetical protein POPTR_0009s10650g [Populus trichocarpa]                                  |
| 945 | 17475 | gi 224107361 | 88.92 | 3  | 3 | 3 |                      | 128813 | ADP-forming family protein [Populus trichocarpa]                                              |
| 516 | 18185 | gi 566211620 | 88.85 | 12 | 3 | 2 |                      | 29136  | hypothetical protein POPTR_0017s05770g [Populus trichocarpa]                                  |
| 554 | 17536 | gi 566178862 | 88.82 | 7  | 2 | 2 |                      | 34943  | hypothetical protein POPTR_0007s00300g [Populus trichocarpa]                                  |
| 779 | 17297 | gi 224141065 | 88.7  | 7  | 3 | 1 |                      | 58604  | mitochondrial processing peptidase beta subunit family protein [Populus trichocarpa]          |
| 604 | 17489 | gi 224071429 | 88.58 | 5  | 2 | 1 | Carbamidomethylation | 44978  | Phosphoribulokinase family protein [Populus trichocarpa]                                      |
| 882 | 596   | gi 225466690 | 88.24 | 10 | 3 | 3 |                      | 42525  | PREDICTED: sedoheptulose-1,7-bisphosphatase chloroplast [Vitis vinifera]                      |
| 710 | 17574 | gi 566178300 | 88.03 | 6  | 2 | 1 | Carbamidomethylation | 45519  | hypothetical protein POPTR_0006s26630g [Populus trichocarpa]                                  |
| 472 | 540   | gi 225449262 | 87.15 | 24 | 5 | 1 |                      | 18173  | PREDICTED: 18.1 kDa class I heat shock protein [Vitis vinifera]                               |
| 563 | 667   | gi 225470804 | 87.09 | 6  | 2 | 1 |                      | 45224  | PREDICTED: phosphoribulokinase chloroplast [Vitis vinifera]                                   |
| 805 | 991   | gi 359494079 | 86.99 | 5  | 2 | 2 | Carbamidomethylation | 65102  | PREDICTED: LOW QUALITY PROTEIN: 65-kDa microtubule-associated protein 1-like [Vitis vinifera] |

|      |       |              |       |    |   |   |                      |       |                                                                                   |
|------|-------|--------------|-------|----|---|---|----------------------|-------|-----------------------------------------------------------------------------------|
| 908  | 17613 | gi 224109576 | 86.98 | 13 | 3 | 1 | Carbamidomethylation | 24014 | hypothetical protein POPTR_0010s21600g [Populus trichocarpa]                      |
| 841  | 1498  | gi 225459760 | 86.77 | 11 | 4 | 4 | Carbamidomethylation | 33454 | PREDICTED: thioredoxin-like protein CDSP32 chloroplastic [Vitis vinifera]         |
| 939  | 17448 | gi 566149991 | 86.73 | 6  | 3 | 2 | Carbamidomethylation | 47475 | hypothetical protein POPTR_0001s20510g [Populus trichocarpa]                      |
| 901  | 16906 | gi 224118744 | 86.64 | 6  | 3 | 1 |                      | 57369 | chaperonin family protein [Populus trichocarpa]                                   |
| 1067 | 1626  | gi 359482440 | 86.62 | 4  | 2 | 1 |                      | 57853 | PREDICTED: alanine aminotransferase 2 [Vitis vinifera]                            |
| 736  | 17747 | gi 224145285 | 86.31 | 17 | 4 | 1 |                      | 24030 | GTP-binding family protein [Populus trichocarpa]                                  |
| 281  | 17618 | gi 224102515 | 86.17 | 7  | 3 | 2 |                      | 29608 | porin family protein [Populus trichocarpa]                                        |
| 431  | 17252 | gi 224075976 | 86.11 | 11 | 3 | 3 | Carbamidomethylation | 31893 | hypothetical protein POPTR_0003s21070g [Populus trichocarpa]                      |
| 713  | 314   | gi 225432110 | 85.9  | 7  | 4 | 4 | Carbamidomethylation | 52920 | PREDICTED: dihydrolipoyl dehydrogenase mitochondrial [Vitis vinifera]             |
| 1217 | 17674 | gi 224104643 | 85.81 | 4  | 2 | 1 |                      | 65194 | thioredoxin family protein [Populus trichocarpa]                                  |
| 557  | 816   | gi 526118026 | 85.52 | 9  | 3 | 2 |                      | 55487 | 5-enolpyruvylshikimate-3-phosphate synthase [Vitis vinifera]                      |
| 1003 | 1643  | gi 225452186 | 85.09 | 12 | 4 | 4 |                      | 30725 | PREDICTED: prohibitin-3 mitochondrial [Vitis vinifera]                            |
| 1039 | 814   | gi 225433414 | 85.01 | 12 | 4 | 4 | Carbamidomethylation | 36594 | PREDICTED: probable voltage-gated potassium channel subunit beta [Vitis vinifera] |
| 343  | 1956  | gi 225442434 | 84.96 | 17 | 2 | 1 |                      | 14228 | PREDICTED: profilin-1 [Vitis vinifera]                                            |
| 607  | 17430 | gi 224055647 | 84.96 | 9  | 3 | 3 |                      | 32125 | succinate dehydrogenase iron-sulfur protein subunit [Populus trichocarpa]         |

|      |       |              |       |    |   |   |                                     |       |                                                                              |
|------|-------|--------------|-------|----|---|---|-------------------------------------|-------|------------------------------------------------------------------------------|
| 637  | 17625 | gi 566204315 | 84.96 | 6  | 4 | 3 | Carbamidomethylation                | 68355 | hypothetical protein POPTR_0014s14690g [Populus trichocarpa]                 |
| 754  | 18129 | gi 566148278 | 84.95 | 8  | 3 | 2 | Carbamidomethylation                | 38178 | UDP-glucose 4-epimerase family protein [Populus trichocarpa]                 |
| 529  | 2344  | gi 225443154 | 84.94 | 18 | 3 | 3 | Carbamidomethylation; Oxidation (M) | 18245 | PREDICTED: lamin-like protein [Vitis vinifera]                               |
| 696  | 171   | gi 225441044 | 84.88 | 7  | 4 | 1 |                                     | 57520 | PREDICTED: pyruvate kinase cytosolic isozyme-like [Vitis vinifera]           |
| 292  | 493   | gi 225436843 | 84.86 | 33 | 3 | 1 |                                     | 14570 | PREDICTED: histone H2AX [Vitis vinifera]                                     |
| 277  | 18717 | gi 224059156 | 84.78 | 18 | 2 | 1 |                                     | 14119 | Profilin 3 family protein [Populus trichocarpa]                              |
| 670  | 17710 | gi 566153375 | 84.75 | 8  | 3 | 1 |                                     | 36703 | hypothetical protein POPTR_0001s37920g [Populus trichocarpa]                 |
| 847  | 18399 | gi 566174518 | 84.73 | 9  | 2 | 2 | Carbamidomethylation                | 40168 | hypothetical protein POPTR_0006s04880g [Populus trichocarpa]                 |
| 690  | 2328  | gi 225435249 | 84.7  | 13 | 2 | 2 |                                     | 27570 | PREDICTED: proteasome subunit beta type-4 [Vitis vinifera]                   |
| 1010 | 854   | gi 731402959 | 84.66 | 8  | 3 | 1 |                                     | 35210 | PREDICTED: probable quinone oxidoreductase [Vitis vinifera]                  |
| 641  | 292   | gi 225439231 | 84.59 | 6  | 3 | 3 | Carbamidomethylation                | 55389 | PREDICTED: 3-isopropylmalate dehydratase large subunit-like [Vitis vinifera] |
| 661  | 17721 | gi 566171771 | 84.49 | 7  | 3 | 1 |                                     | 53299 | hypothetical protein POPTR_0005s16590g partial [Populus trichocarpa]         |
| 439  | 16776 | gi 224095561 | 84.43 | 5  | 4 | 1 |                                     | 97704 | hypothetical protein POPTR_0007s01200g [Populus trichocarpa]                 |
| 763  | 17497 | gi 566205259 | 84.36 | 18 | 4 | 2 | Carbamidomethylation                | 29312 | hypothetical protein POPTR_0015s00690g [Populus trichocarpa]                 |

|      |       |              |       |    |   |   |                      |       |                                                                                                                                       |
|------|-------|--------------|-------|----|---|---|----------------------|-------|---------------------------------------------------------------------------------------------------------------------------------------|
| 1141 | 18667 | gi 566207232 | 84.35 | 8  | 2 | 2 |                      | 29661 | hypothetical protein POPTR_0015s12390g [Populus trichocarpa]                                                                          |
| 473  | 17771 | gi 566148911 | 84.15 | 5  | 2 | 1 |                      | 48782 | hypothetical protein POPTR_0001s14280g [Populus trichocarpa]                                                                          |
| 423  | 17352 | gi 566156897 | 83.83 | 6  | 3 | 2 |                      | 46943 | Delta-aminolevulinic acid dehydratase family protein [Populus trichocarpa]                                                            |
| 1027 | 715   | gi 731436956 | 83.68 | 7  | 3 | 3 | Carbamidomethylation | 39713 | PREDICTED: porphobilinogen deaminase chloroplastic [Vitis vinifera]                                                                   |
| 639  | 601   | gi 731390491 | 83.68 | 3  | 2 | 2 |                      | 84964 | PREDICTED: protein transport protein SEC23-like [Vitis vinifera]                                                                      |
| 1150 | 2321  | gi 731416683 | 83.52 | 20 | 2 | 1 | Carbamidomethylation | 15282 | PREDICTED: superoxide dismutase [Cu-Zn] isoform X2 [Vitis vinifera]                                                                   |
| 731  | 992   | gi 225441912 | 83.39 | 9  | 3 | 1 | Oxidation (M)        | 30951 | PREDICTED: S-formylglutathione hydrolase isoform X4 [Vitis vinifera]                                                                  |
| 1125 | 17838 | gi 224072208 | 83.34 | 11 | 3 | 2 | Carbamidomethylation | 38044 | UDP-glucose 4-epimerase family protein [Populus trichocarpa]                                                                          |
| 622  | 17744 | gi 566172645 | 83.23 | 4  | 2 | 1 | Carbamidomethylation | 70694 | hypothetical protein POPTR_0005s22040g [Populus trichocarpa]                                                                          |
| 1096 | 19132 | gi 224073194 | 83.22 | 4  | 3 | 3 |                      | 67506 | 10-formyltetrahydrofolate synthetase family protein [Populus trichocarpa]                                                             |
| 873  | 581   | gi 731401982 | 83.04 | 7  | 3 | 1 | Carbamidomethylation | 60389 | PREDICTED: dihydrolipoyllysine-residue acetyltransferase component 2 of pyruvate dehydrogenase complex mitochondrial [Vitis vinifera] |
| 434  | 604   | gi 731401756 | 83.03 | 6  | 3 | 1 | Carbamidomethylation | 45526 | PREDICTED: oligouridylate-binding protein 1B isoform X2 [Vitis vinifera]                                                              |

|      |       |              |       |    |   |   |                      |        |                                                                                                                |
|------|-------|--------------|-------|----|---|---|----------------------|--------|----------------------------------------------------------------------------------------------------------------|
| 546  | 466   | gi 225426743 | 83.03 | 16 | 4 | 1 | Carbamidomethylation | 33675  | PREDICTED: bifunctional dTDP-4-dehydrorhamnose 3 5-epimerase/dTDP-4-dehydrorhamnose reductase [Vitis vinifera] |
| 877  | 1149  | gi 225424881 | 83.02 | 5  | 2 | 1 |                      | 48673  | PREDICTED: uncharacterized protein LOC100248339 [Vitis vinifera]                                               |
| 1068 | 1496  | gi 731392621 | 82.84 | 5  | 2 | 1 |                      | 64193  | PREDICTED: protein disulfide isomerase-like 1-4 isoform X2 [Vitis vinifera]                                    |
| 850  | 895   | gi 731406257 | 82.56 | 8  | 4 | 2 | Carbamidomethylation | 45773  | PREDICTED: oligouridylate-binding protein 1 isoform X2 [Vitis vinifera]                                        |
| 724  | 239   | gi 225458111 | 82.53 | 5  | 5 | 1 |                      | 136997 | PREDICTED: coatomer subunit alpha-1 [Vitis vinifera]                                                           |
| 484  | 769   | gi 359488553 | 82.45 | 2  | 2 | 1 |                      | 115409 | PREDICTED: alpha-mannosidase isoform X2 [Vitis vinifera]                                                       |
| 719  | 18064 | gi 566149112 | 82.42 | 24 | 5 | 3 | Carbamidomethylation | 22610  | GTP-binding family protein [Populus trichocarpa]                                                               |
| 540  | 18797 | gi 566198890 | 82.33 | 30 | 3 | 3 | Carbamidomethylation | 9241   | hypothetical protein POPTR_0013s01830g [Populus trichocarpa]                                                   |
| 880  | 686   | gi 225429234 | 82.31 | 9  | 3 | 3 |                      | 34319  | PREDICTED: mitochondrial import receptor subunit TOM40-1 [Vitis vinifera]                                      |
| 657  | 570   | gi 225458567 | 82.29 | 23 | 5 | 5 | Carbamidomethylation | 34519  | PREDICTED: 26S proteasome non-ATPase regulatory subunit 14 homolog [Vitis vinifera]                            |
| 1296 | 709   | gi 359484512 | 82.24 | 5  | 2 | 2 |                      | 63994  | PREDICTED: asparagine--tRNA ligase cytoplasmic 1 [Vitis vinifera]                                              |
| 957  | 18282 | gi 566192369 | 82.02 | 10 | 3 | 3 | Carbamidomethylation | 57235  | Serine carboxypeptidase precursor family protein [Populus trichocarpa]                                         |
| 693  | 16576 | gi 224119200 | 81.79 | 4  | 5 | 1 |                      | 136903 | coatomer alpha subunit-like family protein [Populus trichocarpa]                                               |

|     |       |              |       |    |   |   |                                     |        |                                                                                                 |
|-----|-------|--------------|-------|----|---|---|-------------------------------------|--------|-------------------------------------------------------------------------------------------------|
| 533 | 2140  | gi 225449677 | 81.76 | 10 | 2 | 2 |                                     | 11280  | PREDICTED: 60S acidic ribosomal protein P2 [Vitis vinifera]                                     |
| 567 | 1384  | gi 225437898 | 81.72 | 15 | 3 | 2 |                                     | 15168  | PREDICTED: photosystem I reaction center subunit IV B chloroplastic-like [Vitis vinifera]       |
| 684 | 17548 | gi 224139168 | 81.62 | 6  | 3 | 1 | Carbamidomethylation; Oxidation (M) | 65070  | pyruvate decarboxylase family protein [Populus trichocarpa]                                     |
| 766 | 17374 | gi 566147333 | 81.48 | 3  | 3 | 1 |                                     | 100058 | hypothetical protein POPTR_0001s05320g [Populus trichocarpa]                                    |
| 794 | 276   | gi 225432012 | 81.32 | 11 | 4 | 1 | Carbamidomethylation                | 54243  | PREDICTED: galactokinase [Vitis vinifera]                                                       |
| 823 | 1233  | gi 225448904 | 81.22 | 7  | 2 | 1 |                                     | 48063  | PREDICTED: malate dehydrogenase [NADP] chloroplastic [Vitis vinifera]                           |
| 961 | 2312  | gi 225457389 | 81.17 | 8  | 2 | 2 |                                     | 27867  | PREDICTED: chlorophyll a-b binding protein 4 chloroplastic [Vitis vinifera]                     |
| 448 | 17984 | gi 224078816 | 80.48 | 9  | 3 | 1 |                                     | 36460  | Leucoanthocyanidin reductase family protein [Populus trichocarpa]                               |
| 444 | 1421  | gi 731386809 | 80.26 | 8  | 2 | 1 |                                     | 41704  | PREDICTED: naringenin 2-oxoglutarate 3-dioxygenase-like [Vitis vinifera]                        |
| 768 | 19424 | gi 566211207 | 80.1  | 8  | 3 | 1 | Carbamidomethylation; Oxidation (M) | 38545  | hypothetical protein POPTR_0017s03780g [Populus trichocarpa]                                    |
| 747 | 1507  | gi 225470846 | 79.6  | 13 | 2 | 2 |                                     | 22027  | PREDICTED: nascent polypeptide-associated complex subunit alpha-like protein 1 [Vitis vinifera] |
| 941 | 17641 | gi 566204499 | 79.58 | 7  | 2 | 1 |                                     | 47320  | thioredoxin family protein [Populus trichocarpa]                                                |
| 381 | 17469 | gi 224079472 | 79.53 | 5  | 2 | 2 |                                     | 47114  | hypothetical protein POPTR_0004s08560g [Populus trichocarpa]                                    |

|      |       |              |       |    |   |   |                      |        |                                                                                           |
|------|-------|--------------|-------|----|---|---|----------------------|--------|-------------------------------------------------------------------------------------------|
| 907  | 796   | gi 225423755 | 79.46 | 7  | 3 | 3 |                      | 44272  | PREDICTED: photosystem II stability/assembly factor HCF136 chloroplastic [Vitis vinifera] |
| 1143 | 2166  | gi 359473071 | 79.45 | 4  | 2 | 2 | Carbamidomethylation | 65661  | PREDICTED: bifunctional purine biosynthesis protein purH isoform X2 [Vitis vinifera]      |
| 432  | 17131 | gi 224057882 | 79.28 | 5  | 4 | 3 |                      | 89495  | outer membrane family protein [Populus trichocarpa]                                       |
| 359  | 850   | gi 225450384 | 79.23 | 4  | 3 | 2 | Carbamidomethylation | 57022  | PREDICTED: beta-glucosidase 12-like [Vitis vinifera]                                      |
| 950  | 422   | gi 731439184 | 79.11 | 6  | 3 | 1 |                      | 109426 | PREDICTED: 26S proteasome non-ATPase regulatory subunit 1 homolog A [Vitis vinifera]      |
| 544  | 18175 | gi 566202597 | 79.1  | 22 | 3 | 1 |                      | 16336  | hypothetical protein POPTR_0014s04880g [Populus trichocarpa]                              |
| 364  | 18170 | gi 566157284 | 79.02 | 4  | 2 | 1 | Carbamidomethylation | 48713  | chloroplast nucleoid DNA-binding family protein [Populus trichocarpa]                     |
| 809  | 17351 | gi 224108774 | 78.9  | 11 | 4 | 1 | Carbamidomethylation | 54256  | Galactokinase family protein [Populus trichocarpa]                                        |
| 595  | 1304  | gi 359475330 | 78.9  | 14 | 2 | 1 |                      | 16329  | PREDICTED: glycine-rich RNA-binding protein GRP2A [Vitis vinifera]                        |
| 746  | 1323  | gi 526117539 | 78.86 | 10 | 2 | 1 | Carbamidomethylation | 34687  | class I extracellular chitinase precursor [Vitis vinifera]                                |
| 878  | 61273 | gi 225457387 | 78.47 | 8  | 1 | 1 |                      | 26287  | PREDICTED: expansin-A1 [Vitis vinifera]                                                   |
| 1033 | 776   | gi 731394453 | 78.42 | 7  | 3 | 3 |                      | 46372  | PREDICTED: dnaJ protein homolog isoform X2 [Vitis vinifera]                               |
| 667  | 17535 | gi 566180192 | 78.3  | 9  | 2 | 2 |                      | 27792  | hypothetical protein POPTR_0007s08020g [Populus trichocarpa]                              |
| 288  | 719   | gi 225424242 | 78.27 | 30 | 3 | 1 |                      | 10611  | PREDICTED: 10 kDa chaperonin [Vitis vinifera]                                             |
| 718  | 1500  | gi 225455141 | 78.2  | 37 | 2 | 1 |                      | 11333  | PREDICTED: protein SPIRAL1-like 1 [Vitis vinifera]                                        |



|      |       |              |       |    |   |   |                      |        |                                                                                                     |
|------|-------|--------------|-------|----|---|---|----------------------|--------|-----------------------------------------------------------------------------------------------------|
| 344  | 19092 | gi 224141613 | 78.1  | 18 | 2 | 1 |                      | 14037  | profilin 2 family protein [Populus trichocarpa]                                                     |
| 459  | 2095  | gi 225447745 | 78.06 | 8  | 1 | 1 |                      | 27216  | PREDICTED: chlorophyll a-b binding protein CP24 10A chloroplastic [Vitis vinifera]                  |
| 844  | 1439  | gi 731428465 | 77.86 | 6  | 2 | 2 |                      | 37487  | PREDICTED: thylakoid lumenal 29 kDa protein chloroplastic [Vitis vinifera]                          |
| 679  | 651   | gi 225434329 | 77.65 | 7  | 4 | 3 |                      | 57685  | PREDICTED: trans-cinnamate 4-monooxygenase [Vitis vinifera]                                         |
| 386  | 2534  | gi 731417951 | 77.61 | 10 | 3 | 3 |                      | 27594  | PREDICTED: allene oxide cyclase [Vitis vinifera]                                                    |
| 965  | 2325  | gi 225443274 | 77.37 | 8  | 2 | 2 |                      | 35506  | PREDICTED: cell wall integrity protein scw1 [Vitis vinifera]                                        |
| 1441 | 787   | gi 225450299 | 77.23 | 4  | 1 | 1 |                      | 52389  | PREDICTED: citrate synthase mitochondrial [Vitis vinifera]                                          |
| 916  | 18020 | gi 224140807 | 77.22 | 3  | 3 | 1 |                      | 109369 | 26S proteasome regulatory subunit family protein [Populus trichocarpa]                              |
| 1017 | 1216  | gi 731434246 | 77.05 | 4  | 2 | 2 | Carbamidomethylation | 56111  | PREDICTED: NADH dehydrogenase [ubiquinone] flavoprotein 1 mitochondrial isoform X1 [Vitis vinifera] |
| 620  | 16610 | gi 566159486 | 77.03 | 3  | 3 | 1 |                      | 113839 | hypothetical protein POPTR_0002s22720g [Populus trichocarpa]                                        |
| 714  | 443   | gi 731395934 | 76.87 | 7  | 3 | 1 | Carbamidomethylation | 58724  | PREDICTED: putative proline--tRNA ligase C19C7.06 [Vitis vinifera]                                  |
| 662  | 824   | gi 225451235 | 76.6  | 8  | 2 | 1 |                      | 34370  | PREDICTED: cysteine synthase [Vitis vinifera]                                                       |
| 572  | 17746 | gi 566215609 | 76.36 | 3  | 2 | 1 |                      | 91834  | hypothetical protein POPTR_0018s13110g [Populus trichocarpa]                                        |
| 1194 | 17864 | gi 566153954 | 76.19 | 10 | 3 | 3 |                      | 31003  | phosphatase 2C family protein [Populus trichocarpa]                                                 |
| 829  | 17743 | gi 566175322 | 76.03 | 9  | 2 | 2 |                      | 35273  | aldo/keto reductase family protein [Populus trichocarpa]                                            |

|      |       |              |       |    |   |   |                      |       |                                                                                          |
|------|-------|--------------|-------|----|---|---|----------------------|-------|------------------------------------------------------------------------------------------|
| 1363 | 1362  | gi 225440230 | 75.52 | 7  | 1 | 1 |                      | 29238 | PREDICTED: dihydrofolate reductase [Vitis vinifera]                                      |
| 611  | 1269  | gi 225459906 | 75.45 | 8  | 3 | 2 |                      | 34942 | PREDICTED: probable fructokinase-5 [Vitis vinifera]                                      |
| 735  | 17382 | gi 566183730 | 75.43 | 10 | 3 | 2 | Carbamidomethylation | 48131 | hypothetical protein POPTR_0008s13180g [Populus trichocarpa]                             |
| 1049 | 2128  | gi 731439300 | 75.36 | 4  | 1 | 1 |                      | 49685 | PREDICTED: fumarylacetoacetase [Vitis vinifera]                                          |
| 853  | 71069 | gi 566241274 | 75.36 | 4  | 2 | 1 |                      | 58491 | hypothetical protein POPTR_0019s118101g partial [Populus trichocarpa]                    |
| 1216 | 2125  | gi 731415654 | 75.07 | 3  | 2 | 2 |                      | 73684 | PREDICTED: acyl-CoA-binding domain-containing protein 4-like isoform X2 [Vitis vinifera] |
| 613  | 970   | gi 731413121 | 74.91 | 29 | 3 | 1 | Carbamidomethylation | 15960 | PREDICTED: actin-depolymerizing factor 2-like isoform X2 [Vitis vinifera]                |
| 1142 | 1611  | gi 731417625 | 74.84 | 12 | 2 | 2 |                      | 19282 | PREDICTED: uncharacterized protein LOC100241624 [Vitis vinifera]                         |
| 894  | 1274  | gi 225447549 | 74.73 | 4  | 2 | 1 |                      | 66322 | PREDICTED: glucose-6-phosphate 1-dehydrogenase chloroplastic-like [Vitis vinifera]       |
| 702  | 874   | gi 359478691 | 74.73 | 4  | 3 | 3 |                      | 92178 | PREDICTED: beta-galactosidase 8 [Vitis vinifera]                                         |
| 770  | 1503  | gi 225461001 | 74.72 | 7  | 2 | 2 |                      | 46284 | PREDICTED: polyadenylate-binding protein RBP45-like [Vitis vinifera]                     |
| 362  | 1286  | gi 731433731 | 74.65 | 8  | 3 | 1 |                      | 30030 | PREDICTED: glutathione S-transferase U21-like [Vitis vinifera]                           |
| 483  | 17782 | gi 224143559 | 74.59 | 9  | 3 | 1 |                      | 44475 | aspartate aminotransferase family protein [Populus trichocarpa]                          |

|      |       |              |       |    |   |   |                      |        |                                                                     |
|------|-------|--------------|-------|----|---|---|----------------------|--------|---------------------------------------------------------------------|
| 1457 | 18343 | gi 566161304 | 74.56 | 5  | 2 | 1 |                      | 52669  | hypothetical protein POPTR_0003s07020g [Populus trichocarpa]        |
| 936  | 17567 | gi 224071575 | 74.27 | 6  | 4 | 1 |                      | 65504  | stress inducible family protein [Populus trichocarpa]               |
| 1029 | 951   | gi 731371455 | 74.11 | 4  | 2 | 2 |                      | 58282  | PREDICTED: coatomer subunit delta [Vitis vinifera]                  |
| 983  | 18541 | gi 224103381 | 73.7  | 3  | 2 | 2 |                      | 53021  | diaminopimelate decarboxylase family protein [Populus trichocarpa]  |
| 275  | 1137  | gi 526117471 | 73.48 | 11 | 3 | 2 |                      | 27242  | class IV endochitinase precursor [Vitis vinifera]                   |
| 783  | 18001 | gi 566202441 | 73.44 | 4  | 2 | 2 |                      | 69477  | DYNAMIN-LIKE protein 4 [Populus trichocarpa]                        |
| 909  | 18514 | gi 566165507 | 73.26 | 3  | 3 | 2 | Carbamidomethylation | 92789  | hypothetical protein POPTR_0004s07940g [Populus trichocarpa]        |
| 139  | 19801 | gi 224093204 | 73.23 | 5  | 2 | 1 | Carbamidomethylation | 35946  | peroxidase precursor family protein [Populus trichocarpa]           |
| 987  | 16721 | gi 566157090 | 73.14 | 1  | 3 | 3 |                      | 252616 | hypothetical protein POPTR_0002s09330g [Populus trichocarpa]        |
| 739  | 17366 | gi 566149176 | 72.94 | 4  | 3 | 3 |                      | 74291  | acyl-CoA oxidase family protein [Populus trichocarpa]               |
| 1090 | 17325 | gi 224086345 | 72.84 | 3  | 3 | 1 |                      | 103853 | ATPase 6 family protein [Populus trichocarpa]                       |
| 1059 | 1301  | gi 731426495 | 72.75 | 2  | 2 | 1 |                      | 120041 | PREDICTED: alpha-mannosidase [Vitis vinifera]                       |
| 487  | 18733 | gi 224143583 | 72.69 | 11 | 3 | 3 |                      | 17416  | peroxiredoxin family protein [Populus trichocarpa]                  |
| 532  | 2407  | gi 359495882 | 72.5  | 6  | 2 | 1 | Carbamidomethylation | 39482  | PREDICTED: 2-alkenal reductase (NADP(+)-dependent) [Vitis vinifera] |
| 549  | 784   | gi 225462809 | 72.35 | 4  | 2 | 2 |                      | 60994  | PREDICTED: 2-hydroxyacyl-CoA lyase [Vitis vinifera]                 |
| 1160 | 18395 | gi 566182365 | 72.34 | 8  | 2 | 2 |                      | 34377  | hypothetical protein POPTR_0008s04660g [Populus trichocarpa]        |

|      |       |              |       |    |   |   |                                     |        |                                                                                                                                    |
|------|-------|--------------|-------|----|---|---|-------------------------------------|--------|------------------------------------------------------------------------------------------------------------------------------------|
| 414  | 18297 | gi 566192144 | 72.22 | 6  | 2 | 2 |                                     | 36328  | hypothetical protein POPTR_0010s22170g [Populus trichocarpa]                                                                       |
| 910  | 135   | gi 731402494 | 72.12 | 2  | 2 | 2 |                                     | 102377 | PREDICTED: coatomer subunit beta'-1 [Vitis vinifera]                                                                               |
| 1159 | 1849  | gi 731397296 | 72.1  | 5  | 2 | 1 |                                     | 44232  | PREDICTED: bifunctional aspartate aminotransferase and glutamate/aspartate-prephenate aminotransferase isoform X2 [Vitis vinifera] |
| 1065 | 722   | gi 225430200 | 71.99 | 5  | 2 | 1 |                                     | 40334  | PREDICTED: uncharacterized protein LOC100252479 [Vitis vinifera]                                                                   |
| 760  | 2049  | gi 731411015 | 71.91 | 5  | 2 | 2 |                                     | 46869  | PREDICTED: 3-isopropylmalate dehydrogenase chloroplastic [Vitis vinifera]                                                          |
| 1026 | 942   | gi 225453935 | 71.79 | 10 | 3 | 3 |                                     | 40128  | PREDICTED: 4-hydroxy-tetrahydrodipicolinate synthase chloroplastic [Vitis vinifera]                                                |
| 920  | 1228  | gi 731439510 | 71.71 | 13 | 4 | 4 | Carbamidomethylation                | 41887  | PREDICTED: acetyl-CoA acetyltransferase cytosolic 1 isoform X2 [Vitis vinifera]                                                    |
| 471  | 17044 | gi 566194782 | 71.53 | 5  | 4 | 1 | Carbamidomethylation                | 75679  | NAD-dependent epimerase/dehydratase family protein [Populus trichocarpa]                                                           |
| 954  | 519   | gi 225450981 | 71.3  | 5  | 2 | 2 | Carbamidomethylation                | 51125  | PREDICTED: serine--tRNA ligase [Vitis vinifera]                                                                                    |
| 774  | 950   | gi 225440362 | 71.26 | 32 | 3 | 3 | Carbamidomethylation; Oxidation (M) | 10797  | PREDICTED: mitochondrial import inner membrane translocase subunit Tim9 [Vitis vinifera]                                           |
| 1028 | 17403 | gi 224119184 | 71.17 | 13 | 3 | 1 | Carbamidomethylation                | 35019  | type 2A protein phosphatase-2 [Populus trichocarpa]                                                                                |
| 1042 | 1569  | gi 225457458 | 71.17 | 10 | 3 | 3 |                                     | 17173  | PREDICTED: transcription factor BTF3 homolog 4 [Vitis vinifera]                                                                    |
| 615  | 18734 | gi 566214355 | 71.13 | 7  | 2 | 1 |                                     | 25528  | hypothetical protein POPTR_0018s05350g partial [Populus trichocarpa]                                                               |

|      |       |              |       |    |   |   |                      |       |                                                                                   |
|------|-------|--------------|-------|----|---|---|----------------------|-------|-----------------------------------------------------------------------------------|
| 796  | 18859 | gi 224107333 | 70.96 | 26 | 2 | 2 |                      | 9716  | hypothetical protein POPTR_0010s02580g [Populus trichocarpa]                      |
| 1050 | 496   | gi 225449659 | 70.95 | 5  | 3 | 1 |                      | 57679 | PREDICTED: pyruvate kinase cytosolic isozyme-like [Vitis vinifera]                |
| 493  | 669   | gi 731386337 | 70.86 | 13 | 2 | 2 |                      | 20640 | PREDICTED: serine/arginine-rich splicing factor RSZ22 isoform X2 [Vitis vinifera] |
| 874  | 18206 | gi 566207525 | 70.78 | 4  | 3 | 1 | Carbamidomethylation | 83959 | subtilase family protein [Populus trichocarpa]                                    |
| 946  | 17577 | gi 566188043 | 70.78 | 6  | 2 | 2 |                      | 43097 | hypothetical protein POPTR_0009s14830g [Populus trichocarpa]                      |
| 952  | 18215 | gi 566147574 | 70.52 | 8  | 2 | 2 |                      | 44838 | hypothetical protein POPTR_0001s06560g [Populus trichocarpa]                      |
| 793  | 18384 | gi 224146080 | 70.48 | 14 | 2 | 2 |                      | 17003 | hypothetical protein POPTR_0019s05840g [Populus trichocarpa]                      |
| 492  | 836   | gi 225458231 | 70.43 | 7  | 2 | 2 |                      | 30646 | PREDICTED: proteasome subunit alpha type-1-B [Vitis vinifera]                     |
| 1091 | 18379 | gi 566182095 | 70.4  | 9  | 3 | 2 |                      | 48288 | hypothetical protein POPTR_0008s03160g [Populus trichocarpa]                      |
| 887  | 17596 | gi 566171781 | 70.25 | 3  | 3 | 2 | Carbamidomethylation | 84742 | hypothetical protein POPTR_0005s16660g [Populus trichocarpa]                      |
| 857  | 1380  | gi 731390561 | 70.03 | 4  | 2 | 2 | Carbamidomethylation | 58745 | PREDICTED: probable aldo-keto reductase 4 [Vitis vinifera]                        |
| 1324 | 20107 | gi 224138170 | 70.02 | 29 | 2 | 1 |                      | 7523  | hypothetical protein POPTR_0016s06300g [Populus trichocarpa]                      |
| 699  | 17848 | gi 224112931 | 69.86 | 3  | 2 | 2 |                      | 70298 | peptidase M1 family protein [Populus trichocarpa]                                 |
| 743  | 18092 | gi 566156270 | 69.71 | 4  | 4 | 1 | Carbamidomethylation | 75868 | hypothetical protein POPTR_0002s04800g [Populus trichocarpa]                      |

|      |       |              |       |    |   |   |                      |        |                                                                                  |
|------|-------|--------------|-------|----|---|---|----------------------|--------|----------------------------------------------------------------------------------|
| 716  | 18942 | gi 566197584 | 69.64 | 5  | 2 | 1 |                      | 42529  | hypothetical protein POPTR_0012s09200g [Populus trichocarpa]                     |
| 1158 | 19243 | gi 224134737 | 69.5  | 7  | 1 | 1 |                      | 23290  | cytochrome b5 domain-containing family protein [Populus trichocarpa]             |
| 890  | 2338  | gi 359496232 | 69.42 | 11 | 2 | 2 |                      | 21717  | PREDICTED: probable NAD(P)H dehydrogenase (quinone) FQR1-like 1 [Vitis vinifera] |
| 911  | 17168 | gi 224090159 | 69.33 | 2  | 2 | 2 |                      | 151232 | magnesium chelatase subunit family protein [Populus trichocarpa]                 |
| 1024 | 1995  | gi 731412542 | 69.22 | 5  | 3 | 3 |                      | 58149  | PREDICTED: uncharacterized protein LOC100244432 isoform X4 [Vitis vinifera]      |
| 695  | 18416 | gi 224071567 | 69.18 | 4  | 2 | 1 |                      | 65821  | monocopper oxidase precursor family protein [Populus trichocarpa]                |
| 665  | 17587 | gi 566184208 | 69.07 | 10 | 3 | 3 | Carbamidomethylation | 27210  | hypothetical protein POPTR_0008s15820g [Populus trichocarpa]                     |
| 776  | 17159 | gi 224097404 | 68.79 | 9  | 2 | 2 | Carbamidomethylation | 34870  | type X protein phosphatase-II [Populus trichocarpa]                              |
| 851  | 1009  | gi 359480225 | 68.58 | 19 | 4 | 1 | Carbamidomethylation | 27397  | PREDICTED: peptidyl-prolyl cis-trans isomerase [Vitis vinifera]                  |
| 1087 | 1842  | gi 225447176 | 68.55 | 4  | 2 | 1 |                      | 46608  | PREDICTED: protein disulfide isomerase-like 2-3 [Vitis vinifera]                 |
| 721  | 19786 | gi 566207513 | 68.47 | 2  | 2 | 1 |                      | 68058  | hypothetical protein POPTR_0015s14020g [Populus trichocarpa]                     |
| 623  | 18856 | gi 224099491 | 68.43 | 24 | 2 | 1 |                      | 10451  | hypothetical protein POPTR_0008s12950g [Populus trichocarpa]                     |
| 1020 | 357   | gi 731399677 | 68.4  | 3  | 3 | 1 | Carbamidomethylation | 102437 | PREDICTED: protein argonaute 4A-like [Vitis vinifera]                            |

|      |       |              |       |    |   |   |                      |        |                                                                                                                                       |
|------|-------|--------------|-------|----|---|---|----------------------|--------|---------------------------------------------------------------------------------------------------------------------------------------|
| 1093 | 2627  | gi 731393556 | 68.28 | 8  | 2 | 2 |                      | 29837  | PREDICTED: rhodanese-like/PpiC domain-containing protein 12 isoform X2 [Vitis vinifera]                                               |
| 610  | 17842 | gi 224057968 | 68.27 | 8  | 2 | 1 |                      | 24349  | photosystem I chain III family protein [Populus trichocarpa]                                                                          |
| 940  | 18534 | gi 224063774 | 68.13 | 3  | 2 | 1 |                      | 55604  | 3-phosphoshikimate 1-carboxyvinyltransferase family protein [Populus trichocarpa]                                                     |
| 998  | 1092  | gi 225456481 | 68.03 | 2  | 2 | 1 |                      | 112435 | PREDICTED: alpha-mannosidase [Vitis vinifera]                                                                                         |
| 913  | 903   | gi 225453158 | 68.03 | 5  | 2 | 1 |                      | 41234  | PREDICTED: probable fructokinase-6 chloroplastic [Vitis vinifera]                                                                     |
| 780  | 17094 | gi 224065699 | 67.87 | 2  | 1 | 1 |                      | 75559  | Cell division protein ftsH [Populus trichocarpa]                                                                                      |
| 967  | 2854  | gi 731408416 | 67.86 | 4  | 2 | 1 |                      | 53964  | PREDICTED: serine carboxypeptidase-like 13 [Vitis vinifera]                                                                           |
| 1084 | 1487  | gi 225460716 | 67.85 | 5  | 2 | 2 | Carbamidomethylation | 49588  | PREDICTED: dihydrolipoyllysine-residue acetyltransferase component 5 of pyruvate dehydrogenase complex chloroplastic [Vitis vinifera] |
| 1085 | 868   | gi 225455106 | 67.81 | 7  | 2 | 1 |                      | 33350  | PREDICTED: protein BOBBER 1 [Vitis vinifera]                                                                                          |
| 1161 | 1861  | gi 731428311 | 67.56 | 4  | 2 | 1 |                      | 51458  | PREDICTED: bifunctional aspartate aminotransferase and glutamate/aspartate-prephenate aminotransferase-like [Vitis vinifera]          |
| 734  | 1851  | gi 225439145 | 67.5  | 6  | 2 | 2 |                      | 37191  | PREDICTED: grpE protein homolog mitochondrial isoform X1 [Vitis vinifera]                                                             |
| 771  | 1504  | gi 731426021 | 67.41 | 30 | 2 | 1 |                      | 12464  | PREDICTED: protein SPIRAL1-like 1 isoform X2 [Vitis vinifera]                                                                         |

|      |       |              |       |    |   |   |                      |       |                                                                                                      |
|------|-------|--------------|-------|----|---|---|----------------------|-------|------------------------------------------------------------------------------------------------------|
| 685  | 920   | gi 225436438 | 67.27 | 19 | 2 | 2 |                      | 10607 | PREDICTED: cyclin-dependent kinases regulatory subunit 1 [Vitis vinifera]                            |
| 573  | 1493  | gi 225465605 | 67.11 | 3  | 2 | 1 | Oxidation (M)        | 68015 | PREDICTED: lysosomal beta glucosidase-like [Vitis vinifera]                                          |
| 498  | 1101  | gi 225434062 | 67.1  | 16 | 4 | 2 | Carbamidomethylation | 28430 | PREDICTED: chitinase 5-like [Vitis vinifera]                                                         |
| 1126 | 794   | gi 731374652 | 67.04 | 6  | 2 | 1 |                      | 58335 | PREDICTED: aldehyde dehydrogenase family 2 member B4 mitochondrial [Vitis vinifera]                  |
| 978  | 693   | gi 225437557 | 66.95 | 4  | 2 | 2 |                      | 81022 | PREDICTED: DNA replication licensing factor MCM7 [Vitis vinifera]                                    |
| 903  | 2381  | gi 731384053 | 66.9  | 4  | 2 | 1 |                      | 52608 | PREDICTED: LL-diaminopimelate aminotransferase chloroplastic isoform X1 [Vitis vinifera]             |
| 1149 | 696   | gi 225455513 | 66.9  | 16 | 2 | 2 | Carbamidomethylation | 13646 | PREDICTED: 40S ribosomal protein S20-2 [Vitis vinifera]                                              |
| 1004 | 431   | gi 731391105 | 66.78 | 7  | 3 | 1 | Carbamidomethylation | 49499 | PREDICTED: calreticulin-3-like [Vitis vinifera]                                                      |
| 915  | 17512 | gi 566158761 | 66.57 | 17 | 4 | 1 | Carbamidomethylation | 29101 | cyclophilin family protein [Populus trichocarpa]                                                     |
| 709  | 1201  | gi 225454278 | 66.54 | 6  | 2 | 2 |                      | 40499 | PREDICTED: bifunctional L-3-cyanoalanine synthase/cysteine synthase 1 mitochondrial [Vitis vinifera] |
| 451  | 1075  | gi 526117894 | 66.29 | 7  | 3 | 1 |                      | 36735 | anthocyanidin reductase [Vitis vinifera]                                                             |
| 885  | 2329  | gi 225435002 | 65.99 | 6  | 1 | 1 | Carbamidomethylation | 27396 | PREDICTED: osmotin-like protein [Vitis vinifera]                                                     |
| 1152 | 17671 | gi 566183513 | 65.99 | 4  | 2 | 2 |                      | 62808 | hypothetical protein POPTR_0008s11770g [Populus trichocarpa]                                         |
| 789  | 17372 | gi 224063299 | 65.98 | 4  | 2 | 2 |                      | 67707 | hypothetical protein POPTR_0002s10420g [Populus trichocarpa]                                         |



|      |       |              |       |    |   |   |                                     |       |                                                                                  |
|------|-------|--------------|-------|----|---|---|-------------------------------------|-------|----------------------------------------------------------------------------------|
| 1031 | 19431 | gi 566151403 | 65.96 | 28 | 2 | 2 |                                     | 8809  | hypothetical protein POPTR_0001s28090g [Populus trichocarpa]                     |
| 828  | 18273 | gi 224106686 | 65.92 | 10 | 2 | 1 |                                     | 24434 | elongation factor 1B alpha-subunit 2 family protein [Populus trichocarpa]        |
| 1099 | 19371 | gi 566184421 | 65.8  | 7  | 2 | 2 |                                     | 45388 | hypothetical protein POPTR_0008s17030g [Populus trichocarpa]                     |
| 1295 | 18312 | gi 224082494 | 65.69 | 5  | 2 | 2 |                                     | 38884 | peroxidase precursor family protein [Populus trichocarpa]                        |
| 645  | 2197  | gi 526118093 | 65.64 | 13 | 2 | 2 | Carbamidomethylation                | 22511 | type II peroxiredoxin E [Vitis vinifera]                                         |
| 811  | 1526  | gi 225440674 | 65.52 | 5  | 1 | 1 |                                     | 31431 | PREDICTED: chlorophyll a-b binding protein CP29.1 chloroplastic [Vitis vinifera] |
| 787  | 1838  | gi 225440564 | 65.39 | 4  | 1 | 1 |                                     | 44667 | PREDICTED: fructose-1 6-bisphosphatase chloroplastic-like [Vitis vinifera]       |
| 959  | 18943 | gi 224140195 | 65.39 | 12 | 2 | 2 |                                     | 30031 | 29 kDa ribonucleoprotein [Populus trichocarpa]                                   |
| 1005 | 18013 | gi 566174458 | 65.32 | 17 | 3 | 1 | Carbamidomethylation; Oxidation (M) | 23355 | hypothetical protein POPTR_0006s04560g [Populus trichocarpa]                     |
| 923  | 19722 | gi 566148052 | 65.12 | 8  | 1 | 1 |                                     | 17358 | hypothetical protein POPTR_0001s09270g [Populus trichocarpa]                     |
| 1215 | 17557 | gi 566168605 | 64.95 | 7  | 3 | 1 |                                     | 44259 | hypothetical protein POPTR_0005s00670g [Populus trichocarpa]                     |
| 918  | 18134 | gi 566258065 | 64.82 | 9  | 1 | 1 |                                     | 16877 | hypothetical protein POPTR_0133s00270g partial [Populus trichocarpa]             |
| 884  | 19687 | gi 224089062 | 64.45 | 6  | 1 | 1 |                                     | 27753 | hypothetical protein POPTR_0006s25870g [Populus trichocarpa]                     |
| 560  | 19104 | gi 224078057 | 64.45 | 5  | 1 | 1 |                                     | 28150 | phosphorylase family protein [Populus trichocarpa]                               |

|      |       |              |       |    |   |   |                      |       |                                                                                               |
|------|-------|--------------|-------|----|---|---|----------------------|-------|-----------------------------------------------------------------------------------------------|
| 958  | 17534 | gi 224103431 | 64.39 | 10 | 2 | 1 |                      | 23027 | RAS-related GTP-binding family protein [Populus trichocarpa]                                  |
| 681  | 18430 | gi 224064818 | 64.18 | 4  | 2 | 1 |                      | 47984 | hypothetical protein POPTR_0002s22410g [Populus trichocarpa]                                  |
| 845  | 1358  | gi 731409226 | 64.05 | 4  | 2 | 2 |                      | 43860 | PREDICTED: 3-hydroxyisobutyryl-CoA hydrolase-like protein 5 [Vitis vinifera]                  |
| 1466 | 71086 | gi 225462878 | 64.04 | 15 | 1 | 1 |                      | 21254 | PREDICTED: polyadenylate-binding protein 3-like isoform X1 [Vitis vinifera]                   |
| 951  | 19451 | gi 566160279 | 64    | 5  | 1 | 1 |                      | 36389 | hypothetical protein POPTR_0003s01450g [Populus trichocarpa]                                  |
| 1092 | 1348  | gi 225462545 | 63.9  | 15 | 3 | 3 | Oxidation (M)        | 27262 | PREDICTED: proteasome subunit alpha type-4 [Vitis vinifera]                                   |
| 933  | 744   | gi 359497196 | 63.88 | 14 | 3 | 2 |                      | 23133 | PREDICTED: ras-related protein RABH1e [Vitis vinifera]                                        |
| 494  | 1812  | gi 225430510 | 63.76 | 6  | 3 | 1 |                      | 27121 | PREDICTED: phospholipid hydroperoxide glutathione peroxidase 1 chloroplastic [Vitis vinifera] |
| 517  | 1743  | gi 225441809 | 63.67 | 29 | 3 | 3 |                      | 8917  | PREDICTED: uncharacterized protein LOC100245204 isoform X3 [Vitis vinifera]                   |
| 583  | 521   | gi 225458331 | 63.67 | 5  | 2 | 2 |                      | 49132 | PREDICTED: eukaryotic peptide chain release factor subunit 1-3 [Vitis vinifera]               |
| 1162 | 18938 | gi 566170130 | 63.53 | 8  | 2 | 1 |                      | 51590 | hypothetical protein POPTR_0005s08100g [Populus trichocarpa]                                  |
| 1007 | 1666  | gi 526117699 | 63.52 | 4  | 2 | 2 |                      | 49406 | 3-dehydroquininate synthase-like [Vitis vinifera]                                             |
| 919  | 2600  | gi 526117629 | 63.43 | 8  | 2 | 2 | Carbamidomethylation | 11686 | lipid transfer protein precursor [Vitis vinifera]                                             |

|      |       |              |       |    |   |   |                      |        |                                                                             |
|------|-------|--------------|-------|----|---|---|----------------------|--------|-----------------------------------------------------------------------------|
| 1006 | 60998 | gi 566171779 | 63.42 | 2  | 2 | 1 | Carbamidomethylation | 84881  | hypothetical protein POPTR_0005s16650g partial [Populus trichocarpa]        |
| 1326 | 2392  | gi 731382564 | 63.31 | 4  | 2 | 2 | Carbamidomethylation | 53798  | PREDICTED: aminoacylase-1 isoform X2 [Vitis vinifera]                       |
| 426  | 17604 | gi 566194465 | 63.22 | 7  | 2 | 2 |                      | 24921  | SGS domain-containing family protein [Populus trichocarpa]                  |
| 514  | 1264  | gi 225442963 | 62.98 | 9  | 3 | 3 |                      | 35176  | PREDICTED: methyl-CpG-binding domain-containing protein 11 [Vitis vinifera] |
| 1030 | 310   | gi 225429772 | 62.85 | 3  | 3 | 1 |                      | 104811 | PREDICTED: plasma membrane ATPase 4 [Vitis vinifera]                        |
| 922  | 18008 | gi 566148837 | 62.37 | 5  | 2 | 2 | Carbamidomethylation | 30785  | hypothetical protein POPTR_0001s13880g [Populus trichocarpa]                |
| 707  | 17276 | gi 566170117 | 62.35 | 7  | 3 | 1 |                      | 48844  | hypothetical protein POPTR_0005s08050g [Populus trichocarpa]                |
| 1205 | 17498 | gi 566160463 | 62.28 | 7  | 2 | 2 |                      | 49456  | hypothetical protein POPTR_0003s02420g [Populus trichocarpa]                |
| 1582 | 273   | gi 731411266 | 62.01 | 1  | 1 | 1 |                      | 134450 | PREDICTED: cullin-associated NEDD8-dissociated protein 1 [Vitis vinifera]   |
| 988  | 17093 | gi 224067984 | 61.78 | 3  | 2 | 2 |                      | 68220  | dynammin-like protein B [Populus trichocarpa]                               |
| 1285 | 18022 | gi 224112819 | 61.68 | 17 | 2 | 1 | Carbamidomethylation | 16047  | actin-depolymerizing factor family protein [Populus trichocarpa]            |
| 973  | 1382  | gi 359489656 | 61.68 | 6  | 2 | 2 |                      | 52031  | PREDICTED: probable polygalacturonase [Vitis vinifera]                      |
| 966  | 18707 | gi 224064081 | 61.48 | 9  | 2 | 2 |                      | 28003  | hypothetical protein POPTR_0002s16690g [Populus trichocarpa]                |
| 668  | 18137 | gi 224087780 | 61.33 | 4  | 2 | 1 |                      | 65398  | pyruvate decarboxylase family protein [Populus trichocarpa]                 |

|      |       |              |       |    |   |   |                      |        |                                                                                                                 |
|------|-------|--------------|-------|----|---|---|----------------------|--------|-----------------------------------------------------------------------------------------------------------------|
| 1086 | 1211  | gi 731391365 | 61.24 | 4  | 2 | 2 | Carbamidomethylation | 52738  | PREDICTED: acetolactate synthase small subunit 2 chloroplastic isoform X2 [Vitis vinifera]                      |
| 1664 | 71160 | gi 225444938 | 61.08 | 3  | 1 | 1 |                      | 53784  | PREDICTED: ectonucleotide pyrophosphatase/phosphodiesterase family member 3 [Vitis vinifera]                    |
| 792  | 126   | gi 359486157 | 61.08 | 6  | 2 | 2 |                      | 44506  | PREDICTED: 60S ribosomal protein L3-2 isoform X1 [Vitis vinifera]                                               |
| 1307 | 1177  | gi 225441573 | 60.67 | 3  | 3 | 3 | Carbamidomethylation | 107099 | PREDICTED: eukaryotic translation initiation factor 3 subunit C [Vitis vinifera]                                |
| 1011 | 1573  | gi 731428130 | 60.63 | 5  | 3 | 3 | Carbamidomethylation | 49925  | PREDICTED: kynurenine--oxoglutarate transaminase 1 [Vitis vinifera]                                             |
| 852  | 18117 | gi 566167194 | 60.5  | 8  | 2 | 2 | Carbamidomethylation | 41861  | glycerate dehydrogenase family protein [Populus trichocarpa]                                                    |
| 859  | 1946  | gi 225440849 | 60.41 | 19 | 1 | 1 |                      | 8952   | PREDICTED: probable small nuclear ribonucleoprotein G [Vitis vinifera]                                          |
| 1163 | 61208 | gi 224109620 | 60.13 | 6  | 2 | 1 |                      | 24252  | chalcone isomerase family protein [Populus trichocarpa]                                                         |
| 993  | 28950 | gi 359483854 | 60.05 | 8  | 3 | 3 | Carbamidomethylation | 49342  | PREDICTED: 3-oxoacyl-[acyl-carrier-protein] synthase I chloroplastic [Vitis vinifera]                           |
| 1140 | 19475 | gi 731439030 | 60.04 | 5  | 1 | 1 |                      | 34963  | PREDICTED: ATP-dependent Clp protease proteolytic subunit-related protein 4 chloroplastic-like [Vitis vinifera] |
| 1066 | 17463 | gi 224133304 | 59.73 | 2  | 1 | 1 |                      | 60007  | hypothetical protein POPTR_0015s07690g [Populus trichocarpa]                                                    |
| 866  | 1287  | gi 225460991 | 59.64 | 4  | 2 | 2 |                      | 86153  | PREDICTED: heat shock 70 kDa protein 16 [Vitis vinifera]                                                        |
| 1460 | 18018 | gi 224083504 | 59.6  | 2  | 2 | 2 |                      | 105368 | hypothetical protein POPTR_0005s07000g [Populus trichocarpa]                                                    |

|      |       |              |       |    |   |   |                      |       |                                                                                        |
|------|-------|--------------|-------|----|---|---|----------------------|-------|----------------------------------------------------------------------------------------|
| 1208 | 6864  | gi 359475352 | 59.6  | 3  | 1 | 1 |                      | 49145 | PREDICTED: uncharacterized protein At4g06744 [Vitis vinifera]                          |
| 1044 | 19808 | gi 566160273 | 59.48 | 6  | 1 | 1 | Carbamidomethylation | 17554 | hypothetical protein POPTR_0003s01440g [Populus trichocarpa]                           |
| 585  | 2306  | gi 526117918 | 59.39 | 5  | 1 | 1 |                      | 33457 | basic endochitinase precursor [Vitis vinifera]                                         |
| 749  | 391   | gi 225425280 | 59.3  | 5  | 2 | 1 |                      | 48103 | PREDICTED: uncharacterized protein LOC100247241 [Vitis vinifera]                       |
| 1426 | 18884 | gi 566207658 | 59.14 | 3  | 2 | 2 |                      | 58317 | clathrin adaptor complexes medium subunit-related family protein [Populus trichocarpa] |
| 1503 | 20127 | gi 225435931 | 59.13 | 11 | 2 | 1 |                      | 13713 | PREDICTED: cysteine proteinase inhibitor A [Vitis vinifera]                            |
| 1101 | 2442  | gi 225429295 | 58.98 | 8  | 2 | 1 |                      | 25371 | PREDICTED: uncharacterized protein LOC100254416 [Vitis vinifera]                       |
| 848  | 19311 | gi 566172679 | 58.98 | 2  | 1 | 1 |                      | 63027 | hypothetical protein POPTR_0005s22250g [Populus trichocarpa]                           |
| 722  | 18082 | gi 566176510 | 58.87 | 7  | 3 | 1 |                      | 43124 | nucleosome assembly family protein [Populus trichocarpa]                               |
| 1138 | 18213 | gi 224118508 | 58.85 | 7  | 2 | 2 |                      | 39734 | Chain A family protein [Populus trichocarpa]                                           |
| 858  | 29005 | gi 224084784 | 58.7  | 3  | 2 | 1 |                      | 61214 | glycine hydroxymethyltransferase family protein [Populus trichocarpa]                  |
| 1365 | 910   | gi 225449380 | 58.64 | 4  | 1 | 1 |                      | 39535 | PREDICTED: mannose-1-phosphate guanylyltransferase 1 [Vitis vinifera]                  |
| 1506 | 1120  | gi 225465441 | 58.6  | 12 | 1 | 1 |                      | 14675 | PREDICTED: cytochrome b5 [Vitis vinifera]                                              |
| 843  | 1310  | gi 731401385 | 58.57 | 5  | 2 | 2 |                      | 36064 | PREDICTED: uncharacterized protein At5g02240 [Vitis vinifera]                          |

|      |       |              |       |    |   |   |                      |       |                                                                                       |
|------|-------|--------------|-------|----|---|---|----------------------|-------|---------------------------------------------------------------------------------------|
| 671  | 1615  | gi 359497056 | 58.37 | 5  | 2 | 1 |                      | 35941 | PREDICTED: peroxidase 10-like [Vitis vinifera]                                        |
| 406  | 1422  | gi 731439999 | 58.21 | 2  | 2 | 1 | Carbamidomethylation | 80675 | PREDICTED: primary amine oxidase-like [Vitis vinifera]                                |
| 1308 | 19771 | gi 224106191 | 58.14 | 6  | 2 | 2 | Carbamidomethylation | 35572 | cinnamyl-alcohol dehydrogenase family protein [Populus trichocarpa]                   |
| 748  | 1292  | gi 731378427 | 58.02 | 5  | 3 | 2 |                      | 51975 | PREDICTED: uncharacterized protein LOC100263310 [Vitis vinifera]                      |
| 1070 | 18310 | gi 224143674 | 58    | 5  | 2 | 2 |                      | 38385 | fructose-1 family protein [Populus trichocarpa]                                       |
| 818  | 1779  | gi 225448795 | 57.93 | 11 | 3 | 3 | Carbamidomethylation | 19172 | PREDICTED: cytochrome c oxidase subunit 6b-1 isoform X4 [Vitis vinifera]              |
| 1257 | 18812 | gi 671741947 | 57.92 | 22 | 2 | 2 |                      | 9397  | photosystem II cytochrome b559 alpha subunit (chloroplast) [Camellia grandibracteata] |
| 518  | 800   | gi 225450811 | 57.87 | 12 | 2 | 1 |                      | 14652 | PREDICTED: histone H2A.1 [Vitis vinifera]                                             |
| 1593 | 61026 | gi 731393292 | 57.83 | 2  | 1 | 1 |                      | 72077 | PREDICTED: glucosidase 2 subunit beta isoform X2 [Vitis vinifera]                     |
| 1134 | 611   | gi 225437455 | 57.66 | 2  | 1 | 1 |                      | 53532 | PREDICTED: fumarate hydratase 1 mitochondrial [Vitis vinifera]                        |
| 1202 | 1309  | gi 731398937 | 57.61 | 15 | 2 | 1 | Carbamidomethylation | 21183 | PREDICTED: actin-depolymerizing factor 1-like [Vitis vinifera]                        |
| 285  | 914   | gi 225440109 | 57.45 | 13 | 2 | 1 |                      | 10658 | PREDICTED: 10 kDa chaperonin [Vitis vinifera]                                         |
| 881  | 2234  | gi 225441977 | 57.38 | 2  | 2 | 1 |                      | 66737 | PREDICTED: pectinesterase [Vitis vinifera]                                            |
| 1035 | 5205  | gi 359482448 | 57.28 | 2  | 2 | 1 | Carbamidomethylation | 83440 | PREDICTED: subtilisin-like protease [Vitis vinifera]                                  |
| 1507 | 61055 | gi 224081483 | 57.27 | 10 | 1 | 1 |                      | 15916 | hypothetical protein POPTR_0005s10440g [Populus trichocarpa]                          |

|      |       |              |       |    |   |   |                      |       |                                                                                           |
|------|-------|--------------|-------|----|---|---|----------------------|-------|-------------------------------------------------------------------------------------------|
| 819  | 19744 | gi 224137260 | 57.25 | 12 | 1 | 1 |                      | 11459 | hypothetical protein POPTR_0016s01100g [Populus trichocarpa]                              |
| 1058 | 17099 | gi 566149188 | 57.24 | 7  | 1 | 1 |                      | 24300 | 60S ribosomal protein L15 [Populus trichocarpa]                                           |
| 846  | 17730 | gi 566189053 | 57.19 | 2  | 1 | 1 |                      | 51981 | hypothetical protein POPTR_0010s04610g [Populus trichocarpa]                              |
| 558  | 2865  | gi 359479995 | 57.13 | 2  | 2 | 1 |                      | 61649 | PREDICTED: pectinesterase-like [Vitis vinifera]                                           |
| 1436 | 2403  | gi 225470816 | 57.09 | 23 | 1 | 1 |                      | 5428  | PREDICTED: wound-induced basic protein [Vitis vinifera]                                   |
| 833  | 423   | gi 225434133 | 56.87 | 6  | 2 | 2 |                      | 40613 | PREDICTED: cysteine synthase chloroplatic/chromoplatic [Vitis vinifera]                   |
| 757  | 306   | gi 731438745 | 56.77 | 2  | 2 | 1 |                      | 92847 | PREDICTED: DNA replication licensing factor MCM6 [Vitis vinifera]                         |
| 1462 | 18387 | gi 566160574 | 56.64 | 2  | 1 | 1 |                      | 57226 | serine/threonine protein phosphatase 2A 55 kDa regulatory subunit B [Populus trichocarpa] |
| 1034 | 1167  | gi 225457034 | 56.59 | 4  | 2 | 2 | Carbamidomethylation | 51176 | PREDICTED: 1-deoxy-D-xylulose 5-phosphate reductoisomerase chloroplatic [Vitis vinifera]  |
| 1041 | 71043 | gi 224055553 | 56.53 | 13 | 3 | 3 |                      | 19637 | 50S ribosomal protein L12-2 [Populus trichocarpa]                                         |
| 968  | 28940 | gi 566162305 | 56.29 | 6  | 2 | 1 | Carbamidomethylation | 38904 | UDP-glucose 4-epimerase family protein [Populus trichocarpa]                              |
| 938  | 653   | gi 225449060 | 56.2  | 5  | 3 | 2 | Carbamidomethylation | 62143 | PREDICTED: protein disulfide isomerase-like 1-4 [Vitis vinifera]                          |
| 1219 | 18326 | gi 224109088 | 56.15 | 2  | 1 | 1 |                      | 57503 | SUCCINIC SEMIALDEHYDE DEHYDROGENASE family protein [Populus trichocarpa]                  |
| 1509 | 2502  | gi 225424908 | 56.14 | 4  | 2 | 2 |                      | 29426 | PREDICTED: mitochondrial outer membrane protein porin of 36 kDa [Vitis vinifera]          |

|      |       |              |       |    |   |   |                      |       |                                                                                  |
|------|-------|--------------|-------|----|---|---|----------------------|-------|----------------------------------------------------------------------------------|
| 969  | 20226 | gi 566161648 | 55.4  | 5  | 1 | 1 |                      | 17801 | glycine cleavage system protein H precursor [Populus trichocarpa]                |
| 1008 | 17393 | gi 566151113 | 55.33 | 1  | 1 | 1 |                      | 76209 | hypothetical protein POPTR_0001s26420g [Populus trichocarpa]                     |
| 1057 | 19441 | gi 566166966 | 55.23 | 6  | 2 | 2 |                      | 33173 | hypothetical protein POPTR_0004s17010g [Populus trichocarpa]                     |
| 738  | 29860 | gi 566201923 | 54.9  | 3  | 2 | 2 |                      | 43928 | hypothetical protein POPTR_0014s01960g [Populus trichocarpa]                     |
| 1036 | 1542  | gi 225458237 | 54.89 | 5  | 1 | 1 | Carbamidomethylation | 29571 | PREDICTED: gamma carbonic anhydrase 1 mitochondrial [Vitis vinifera]             |
| 1303 | 19816 | gi 566197446 | 54.84 | 3  | 1 | 1 |                      | 44436 | hypothetical protein POPTR_0012s08440g [Populus trichocarpa]                     |
| 1156 | 19582 | gi 224062109 | 54.69 | 3  | 1 | 1 |                      | 38699 | dihydroflavonol reductase family protein [Populus trichocarpa]                   |
| 1227 | 2552  | gi 731393274 | 54.64 | 1  | 1 | 1 |                      | 76795 | PREDICTED: uncharacterized protein LOC100253534 isoform X2 [Vitis vinifera]      |
| 1103 | 1632  | gi 225447707 | 54.61 | 6  | 1 | 1 |                      | 27098 | PREDICTED: uncharacterized protein LOC100263170 [Vitis vinifera]                 |
| 1504 | 894   | gi 225444609 | 54.52 | 7  | 1 | 1 |                      | 26208 | PREDICTED: eukaryotic translation initiation factor 3 subunit K [Vitis vinifera] |
| 897  | 19869 | gi 566170529 | 53.93 | 5  | 2 | 1 |                      | 40018 | hypothetical protein POPTR_0005s10260g [Populus trichocarpa]                     |
| 1287 | 18403 | gi 566171982 | 53.9  | 4  | 1 | 1 |                      | 38050 | hypothetical protein POPTR_0005s18180g [Populus trichocarpa]                     |
| 435  | 1077  | gi 225448675 | 53.88 | 10 | 2 | 2 |                      | 23332 | PREDICTED: probable chalcone--flavonone isomerase 3 [Vitis vinifera]             |



|      |       |              |       |    |   |   |                      |        |                                                                                     |
|------|-------|--------------|-------|----|---|---|----------------------|--------|-------------------------------------------------------------------------------------|
| 888  | 367   | gi 225444472 | 53.72 | 8  | 3 | 3 | Carbamidomethylation | 44306  | PREDICTED: aminomethyltransferase mitochondrial [Vitis vinifera]                    |
| 864  | 2050  | gi 731393849 | 53.52 | 3  | 1 | 1 |                      | 56128  | PREDICTED: UBP1-associated protein 2A [Vitis vinifera]                              |
| 889  | 33319 | gi 224062595 | 53.3  | 6  | 2 | 2 |                      | 28191  | photosystem II oxygen-evolving complex protein 2 precursor [Populus trichocarpa]    |
| 1366 | 18976 | gi 566180962 | 52.8  | 3  | 1 | 1 |                      | 60958  | hypothetical protein POPTR_0007s12550g [Populus trichocarpa]                        |
| 1128 | 243   | gi 225429750 | 52.78 | 1  | 1 | 1 | Carbamidomethylation | 105919 | PREDICTED: coatomer subunit beta-1 [Vitis vinifera]                                 |
| 1204 | 445   | gi 225454087 | 52.73 | 3  | 2 | 1 |                      | 66696  | PREDICTED: NAD-dependent malic enzyme 59 kDa isoform mitochondrial [Vitis vinifera] |
| 924  | 18794 | gi 224066629 | 52.71 | 8  | 1 | 1 |                      | 16281  | thioredoxin family protein [Populus trichocarpa]                                    |
| 1720 | 19719 | gi 566152742 | 52.46 | 10 | 1 | 1 |                      | 14748  | double-stranded DNA-binding family protein [Populus trichocarpa]                    |
| 759  | 717   | gi 225463033 | 52.45 | 2  | 2 | 2 |                      | 110326 | PREDICTED: 116 kDa U5 small nuclear ribonucleoprotein component [Vitis vinifera]    |
| 1203 | 17214 | gi 224127578 | 52.36 | 3  | 2 | 1 |                      | 67172  | NAD-dependent malic enzyme family protein [Populus trichocarpa]                     |
| 1859 | 1340  | gi 225442595 | 52.36 | 2  | 1 | 1 |                      | 60200  | PREDICTED: protein disulfide isomerase-like 1-6 [Vitis vinifera]                    |
| 745  | 19380 | gi 731407226 | 52.27 | 4  | 1 | 1 | Carbamidomethylation | 37934  | PREDICTED: 2-alkenal reductase (NADP(+)-dependent) [Vitis vinifera]                 |
| 999  | 1435  | gi 225464870 | 52.17 | 4  | 1 | 1 | Carbamidomethylation | 37627  | PREDICTED: bifunctional nitrilase/nitrile hydratase NIT4B [Vitis vinifera]          |
| 799  | 1811  | gi 225428031 | 51.96 | 4  | 2 | 2 |                      | 45128  | PREDICTED: WD-40 repeat-containing protein MSI3 [Vitis vinifera]                    |

|      |       |              |       |    |   |   |                      |        |                                                                                                |
|------|-------|--------------|-------|----|---|---|----------------------|--------|------------------------------------------------------------------------------------------------|
| 624  | 18132 | gi 566151049 | 51.71 | 6  | 2 | 2 |                      | 26982  | hypothetical protein POPTR_0001s26020g [Populus trichocarpa]                                   |
| 1061 | 471   | gi 225433575 | 51.55 | 1  | 1 | 1 |                      | 105215 | PREDICTED: probable glucan 1 3-alpha-glucosidase [Vitis vinifera]                              |
| 955  | 949   | gi 225457152 | 51.51 | 4  | 2 | 1 |                      | 54621  | PREDICTED: betaine aldehyde dehydrogenase 2 mitochondrial [Vitis vinifera]                     |
| 855  | 61304 | gi 566158623 | 51.49 | 3  | 1 | 1 |                      | 31302  | hypothetical protein POPTR_0002s17990g [Populus trichocarpa]                                   |
| 1302 | 18566 | gi 359473657 | 51.18 | 2  | 1 | 1 |                      | 65748  | PREDICTED: delta(24)-sterol reductase [Vitis vinifera]                                         |
| 1325 | 61060 | gi 566192679 | 51.1  | 27 | 2 | 1 |                      | 6086   | hypothetical protein POPTR_0010s25170g [Populus trichocarpa]                                   |
| 1220 | 19350 | gi 224073782 | 51.04 | 9  | 1 | 1 | Carbamidomethylation | 21868  | proline-rich family protein [Populus trichocarpa]                                              |
| 1218 | 18611 | gi 224077508 | 50.85 | 6  | 2 | 2 |                      | 39890  | putative protein phosphatase [Populus trichocarpa]                                             |
| 825  | 1327  | gi 731440653 | 50.68 | 6  | 1 | 1 |                      | 23090  | PREDICTED: ras-related protein RAB1c [Vitis vinifera]                                          |
| 914  | 18864 | gi 731383454 | 50.63 | 4  | 1 | 1 |                      | 43734  | PREDICTED: probable N-acetyl-gamma-glutamyl-phosphate reductase chloroplastic [Vitis vinifera] |
| 1468 | 61079 | gi 224084676 | 50.19 | 3  | 1 | 1 |                      | 31324  | hypothetical protein POPTR_0005s17010g [Populus trichocarpa]                                   |
| 1300 | 19030 | gi 566167266 | 50.05 | 4  | 1 | 1 |                      | 37830  | hypothetical protein POPTR_0004s18610g [Populus trichocarpa]                                   |
| 443  | 43809 | gi 566195980 | 49.74 | 5  | 1 | 1 |                      | 17497  | Photosystem I reaction center subunit V family protein [Populus trichocarpa]                   |
| 1195 | 17905 | gi 224105715 | 49.72 | 4  | 2 | 1 | Carbamidomethylation | 69881  | vacuolar sorting receptor protein BP-80 [Populus trichocarpa]                                  |

|      |       |              |       |   |   |   |                      |        |                                                                         |
|------|-------|--------------|-------|---|---|---|----------------------|--------|-------------------------------------------------------------------------|
| 1508 | 17431 | gi 566176019 | 49.63 | 4 | 1 | 1 |                      | 39252  | isocitrate dehydrogenase family protein [Populus trichocarpa]           |
| 1012 | 17447 | gi 566185959 | 49.57 | 6 | 2 | 2 |                      | 27367  | Proteasome subunit alpha type 3 family protein [Populus trichocarpa]    |
| 1157 | 18775 | gi 566181200 | 49.5  | 2 | 1 | 1 |                      | 55243  | serine carboxypeptidase S28 family protein [Populus trichocarpa]        |
| 1139 | 1090  | gi 225465997 | 49.43 | 3 | 1 | 1 |                      | 48382  | PREDICTED: WD-40 repeat-containing protein MS11 [Vitis vinifera]        |
| 905  | 17608 | gi 224131618 | 49.23 | 7 | 2 | 2 |                      | 26206  | dienelactone hydrolase family protein [Populus trichocarpa]             |
| 1088 | 2359  | gi 225460861 | 49.14 | 9 | 1 | 1 |                      | 12136  | PREDICTED: mitochondrial pyruvate carrier 2 isoform X2 [Vitis vinifera] |
| 1409 | 17396 | gi 224119992 | 49.12 | 2 | 2 | 2 | Carbamidomethylation | 143158 | hypothetical protein POPTR_0012s13100g [Populus trichocarpa]            |
| 1377 | 18307 | gi 224113315 | 48.77 | 2 | 1 | 1 |                      | 66874  | hypothetical protein POPTR_0010s25600g [Populus trichocarpa]            |
| 960  | 19955 | gi 225445842 | 48.6  | 9 | 2 | 2 |                      | 21531  | PREDICTED: uncharacterized protein LOC100243229 [Vitis vinifera]        |
| 1221 | 19216 | gi 566170063 | 48.56 | 4 | 1 | 1 |                      | 32177  | hypothetical protein POPTR_0005s07750g [Populus trichocarpa]            |
| 1465 | 61167 | gi 566187811 | 48.5  | 5 | 1 | 1 | Carbamidomethylation | 16218  | hypothetical protein POPTR_0009s13460g [Populus trichocarpa]            |
| 1383 | 1763  | gi 731440118 | 48.5  | 1 | 1 | 1 |                      | 144044 | PREDICTED: kinesin-like protein KCA2 [Vitis vinifera]                   |
| 723  | 19229 | gi 566165862 | 48.26 | 2 | 1 | 1 |                      | 41915  | hypothetical protein POPTR_0004s10130g [Populus trichocarpa]            |
| 839  | 1695  | gi 731408423 | 48.15 | 4 | 2 | 2 | Carbamidomethylation | 43098  | PREDICTED: serine carboxypeptidase-like 18 isoform X4 [Vitis vinifera]  |

|      |       |              |       |    |   |   |                      |        |                                                                                                             |
|------|-------|--------------|-------|----|---|---|----------------------|--------|-------------------------------------------------------------------------------------------------------------|
| 895  | 1486  | gi 225465204 | 47.94 | 1  | 1 | 1 | Carbamidomethylation | 122695 | PREDICTED: leucine--tRNA ligase cytoplasmic [Vitis vinifera]                                                |
| 947  | 5615  | gi 225470242 | 47.77 | 6  | 1 | 1 |                      | 16680  | PREDICTED: uncharacterized protein At5g48480 [Vitis vinifera]                                               |
| 1190 | 17769 | gi 566192876 | 47.53 | 5  | 2 | 1 |                      | 47035  | hypothetical protein POPTR_0010s26170g [Populus trichocarpa]                                                |
| 686  | 1660  | gi 225452452 | 47.45 | 2  | 1 | 1 |                      | 36545  | PREDICTED: carbonic anhydrase 2 isoform X1 [Vitis vinifera]                                                 |
| 1329 | 19947 | gi 224084924 | 47.41 | 4  | 1 | 1 | Carbamidomethylation | 22828  | Proteasome subunit beta type 3-2 family protein [Populus trichocarpa]                                       |
| 925  | 19953 | gi 566205586 | 47.29 | 4  | 1 | 1 |                      | 33515  | hypothetical protein POPTR_0015s03360g [Populus trichocarpa]                                                |
| 307  | 19403 | gi 566166342 | 47.27 | 1  | 1 | 1 |                      | 95030  | hypothetical protein POPTR_0004s13420g partial [Populus trichocarpa]                                        |
| 669  | 1373  | gi 225465210 | 47.25 | 10 | 1 | 1 |                      | 11974  | PREDICTED: cytochrome c [Vitis vinifera]                                                                    |
| 970  | 901   | gi 359493854 | 47.1  | 6  | 1 | 1 |                      | 20058  | PREDICTED: thioredoxin M4 chloroplastic [Vitis vinifera]                                                    |
| 1144 | 18454 | gi 224124728 | 47.03 | 7  | 2 | 1 | Oxidation (M)        | 31993  | peroxidase family protein [Populus trichocarpa]                                                             |
| 1224 | 18074 | gi 566161702 | 46.97 | 6  | 2 | 1 |                      | 30568  | Mitochondrial carnitine/acylcarnitine carrier-like family protein [Populus trichocarpa]                     |
| 1077 | 2168  | gi 359474991 | 46.7  | 3  | 1 | 1 |                      | 37335  | PREDICTED: heterodimeric geranylgeranyl pyrophosphate synthase small subunit chloroplastic [Vitis vinifera] |
| 587  | 19810 | gi 566163928 | 46.61 | 6  | 1 | 1 |                      | 21587  | disease resistance-responsive family protein [Populus trichocarpa]                                          |

|      |       |              |       |   |   |   |                      |       |                                                                          |
|------|-------|--------------|-------|---|---|---|----------------------|-------|--------------------------------------------------------------------------|
| 962  | 2180  | gi 225428049 | 46.51 | 3 | 1 | 1 |                      | 42284 | PREDICTED: glycerate dehydrogenase HPR peroxisomal [Vitis vinifera]      |
| 1097 | 18891 | gi 566152365 | 46.44 | 4 | 2 | 2 |                      | 43020 | Vacuolar ATP synthase subunit C family protein [Populus trichocarpa]     |
| 1458 | 19298 | gi 224122632 | 46.43 | 4 | 2 | 1 |                      | 66196 | Monocopper oxidase-like protein SKS1 precursor [Populus trichocarpa]     |
| 971  | 18088 | gi 566179487 | 46.39 | 3 | 1 | 1 |                      | 41063 | hypothetical protein POPTR_0007s03900g [Populus trichocarpa]             |
| 1073 | 18054 | gi 224068558 | 46.06 | 4 | 1 | 1 |                      | 32725 | NUCLEAR ENCODED CLP PROTEASE 1 family protein [Populus trichocarpa]      |
| 638  | 61222 | gi 224059600 | 45.95 | 2 | 1 | 1 |                      | 40957 | hypothetical protein POPTR_0001s26960g [Populus trichocarpa]             |
| 1807 | 2203  | gi 731387671 | 45.62 | 4 | 1 | 1 | Carbamidomethylation | 39674 | PREDICTED: thioredoxin reductase NTRB-like [Vitis vinifera]              |
| 1100 | 18595 | gi 566190935 | 45.55 | 3 | 2 | 1 |                      | 61141 | hypothetical protein POPTR_0010s15200g [Populus trichocarpa]             |
| 824  | 20173 | gi 566181914 | 45.53 | 5 | 2 | 1 |                      | 34297 | hypothetical protein POPTR_0008s02330g [Populus trichocarpa]             |
| 1328 | 18988 | gi 224072767 | 45.41 | 4 | 1 | 1 |                      | 29070 | hypothetical protein POPTR_0003s18420g [Populus trichocarpa]             |
| 1102 | 2038  | gi 526117828 | 45.39 | 6 | 1 | 1 |                      | 16599 | serine/threonine kinase-like [Vitis vinifera]                            |
| 1226 | 28969 | gi 225468850 | 45.27 | 4 | 1 | 1 |                      | 30830 | PREDICTED: glyoxylate/succinic semialdehyde reductase 1 [Vitis vinifera] |
| 441  | 43802 | gi 224086681 | 45.06 | 2 | 1 | 1 |                      | 50649 | RNA recognition motif-containing family protein [Populus trichocarpa]    |

|      |       |              |       |    |   |   |                      |       |                                                                                    |
|------|-------|--------------|-------|----|---|---|----------------------|-------|------------------------------------------------------------------------------------|
| 1075 | 17434 | gi 566179312 | 44.87 | 2  | 2 | 2 |                      | 92290 | hypothetical protein POPTR_0007s02960g [Populus trichocarpa]                       |
| 1297 | 17889 | gi 566149128 | 44.79 | 7  | 2 | 2 | Carbamidomethylation | 47077 | hypothetical protein POPTR_0001s15330g [Populus trichocarpa]                       |
| 461  | 18903 | gi 566146533 | 44.77 | 14 | 2 | 2 |                      | 10147 | acyl-CoA-binding family protein [Populus trichocarpa]                              |
| 1510 | 2512  | gi 359491781 | 44.71 | 6  | 1 | 1 |                      | 18046 | PREDICTED: miraculin-like partial [Vitis vinifera]                                 |
| 1198 | 1139  | gi 359484892 | 44.58 | 3  | 2 | 2 |                      | 86995 | PREDICTED: eukaryotic translation initiation factor isoform 4G-1 [Vitis vinifera]  |
| 1330 | 29812 | gi 224136252 | 44.42 | 19 | 1 | 1 | Carbamidomethylation | 8798  | hypothetical protein POPTR_0015s11410g [Populus trichocarpa]                       |
| 800  | 17900 | gi 224104697 | 44.18 | 9  | 2 | 2 |                      | 20848 | lactoylglutathione lyase family protein [Populus trichocarpa]                      |
| 1860 | 2400  | gi 225434808 | 44.13 | 3  | 1 | 1 |                      | 32777 | PREDICTED: eukaryotic translation initiation factor 3 subunit G-B [Vitis vinifera] |
| 376  | 2609  | gi 359480551 | 44.09 | 3  | 1 | 1 |                      | 29290 | PREDICTED: mitochondrial outer membrane protein porin 2 [Vitis vinifera]           |
| 816  | 2775  | gi 731436245 | 43.99 | 3  | 2 | 1 |                      | 66120 | PREDICTED: putative laccase-9 [Vitis vinifera]                                     |
| 1427 | 18658 | gi 224117530 | 43.88 | 6  | 1 | 1 |                      | 21810 | endoribonuclease L-PSP family protein [Populus trichocarpa]                        |
| 664  | 2476  | gi 225440171 | 43.85 | 4  | 1 | 1 |                      | 26618 | PREDICTED: cysteine proteinase inhibitor 12-like [Vitis vinifera]                  |
| 1078 | 19480 | gi 224112341 | 43.84 | 3  | 1 | 1 |                      | 46306 | latex abundant family protein [Populus trichocarpa]                                |
| 1016 | 18121 | gi 566172301 | 43.63 | 5  | 2 | 1 | Carbamidomethylation | 54904 | disulfide-isomerase family protein [Populus trichocarpa]                           |
| 1013 | 2451  | gi 225439775 | 43.58 | 4  | 1 | 1 |                      | 27055 | PREDICTED: glutathione S-transferase L3-like [Vitis vinifera]                      |
| 1459 | 1965  | gi 225459318 | 43.53 | 4  | 2 | 1 | Carbamidomethylation | 35188 | PREDICTED: annexin D1 [Vitis vinifera]                                             |

|      |       |              |       |   |   |   |  |        |                                                                                          |
|------|-------|--------------|-------|---|---|---|--|--------|------------------------------------------------------------------------------------------|
| 777  | 19863 | gi 566212628 | 43.46 | 7 | 1 | 1 |  | 17449  | hypothetical protein POPTR_0017s10800g [Populus trichocarpa]                             |
| 1811 | 412   | gi 225443760 | 43.45 | 8 | 1 | 1 |  | 20875  | PREDICTED: 60S ribosomal protein L11-1-like [Vitis vinifera]                             |
| 1331 | 921   | gi 731382079 | 43.3  | 1 | 1 | 1 |  | 110376 | PREDICTED: neutral alpha-glucosidase C-like isoform X2 [Vitis vinifera]                  |
| 1601 | 1597  | gi 526118004 | 43.23 | 2 | 1 | 1 |  | 47748  | probable E3 ubiquitin-protein ligase HERC1-like [Vitis vinifera]                         |
| 1229 | 30041 | gi 224066755 | 43.12 | 5 | 1 | 1 |  | 19335  | thioredoxin m family protein [Populus trichocarpa]                                       |
| 1104 | 30070 | gi 225443988 | 43.03 | 7 | 1 | 1 |  | 13228  | PREDICTED: photosystem I reaction center subunit psaK chloroplastic [Vitis vinifera]     |
| 1151 | 17661 | gi 566237896 | 43.02 | 3 | 2 | 2 |  | 58183  | hypothetical protein POPTR_0019s09060g [Populus trichocarpa]                             |
| 608  | 19106 | gi 224078826 | 42.94 | 4 | 1 | 1 |  | 24905  | Oxygen-evolving enhancer protein 3-1 [Populus trichocarpa]                               |
| 1484 | 1093  | gi 225438067 | 42.74 | 2 | 1 | 1 |  | 45402  | PREDICTED: succinyl-CoA ligase [ADP-forming] subunit beta mitochondrial [Vitis vinifera] |
| 1079 | 29179 | gi 566195867 | 42.73 | 3 | 1 | 1 |  | 52643  | hypothetical protein POPTR_0011s16630g [Populus trichocarpa]                             |
| 706  | 2504  | gi 731416298 | 42.67 | 4 | 1 | 1 |  | 25123  | PREDICTED: eukaryotic translation initiation factor 3 subunit J [Vitis vinifera]         |
| 1106 | 19544 | gi 566164408 | 42.57 | 2 | 1 | 1 |  | 45443  | RNA-binding protein 45 [Populus trichocarpa]                                             |
| 1045 | 19921 | gi 566210424 | 42.51 | 3 | 1 | 1 |  | 35704  | hypothetical protein POPTR_0017s00350g [Populus trichocarpa]                             |

|      |       |              |       |    |   |   |                      |       |                                                                                                                   |
|------|-------|--------------|-------|----|---|---|----------------------|-------|-------------------------------------------------------------------------------------------------------------------|
| 1467 | 17767 | gi 566157737 | 42.45 | 1  | 1 | 1 |                      | 79950 | hypothetical protein POPTR_0002s13010g [Populus trichocarpa]                                                      |
| 772  | 30077 | gi 566214618 | 42.18 | 7  | 1 | 1 | Carbamidomethylation | 13633 | hypothetical protein POPTR_0018s06830g [Populus trichocarpa]                                                      |
| 1804 | 17777 | gi 566153407 | 42.1  | 3  | 1 | 1 |                      | 42007 | ferredoxin-NADP reductase family protein [Populus trichocarpa]                                                    |
| 1105 | 2524  | gi 225452110 | 42.09 | 10 | 1 | 1 | Carbamidomethylation | 9858  | PREDICTED: non-specific lipid-transfer protein 2-like [Vitis vinifera]                                            |
| 1434 | 61182 | gi 224085575 | 42.08 | 5  | 1 | 1 |                      | 28237 | NADH-ubiquinone oxidoreductase 24 kDa subunit family protein [Populus trichocarpa]                                |
| 1146 | 17909 | gi 224133898 | 42.02 | 2  | 1 | 1 | Carbamidomethylation | 53810 | aspartyl aminopeptidase family protein [Populus trichocarpa]                                                      |
| 1211 | 19737 | gi 224070843 | 41.98 | 8  | 1 | 1 |                      | 19159 | glutaredoxin family protein [Populus trichocarpa]                                                                 |
| 1147 | 2026  | gi 359492937 | 41.98 | 2  | 1 | 1 |                      | 46528 | PREDICTED: aspartic proteinase nepenthesin-1 [Vitis vinifera]                                                     |
| 1123 | 1750  | gi 225447488 | 41.93 | 2  | 1 | 1 |                      | 63568 | PREDICTED: uncharacterized protein LOC100266500 [Vitis vinifera]                                                  |
| 1164 | 18678 | gi 566210985 | 41.93 | 3  | 1 | 1 |                      | 51941 | glycosyl hydrolase family 17 family protein [Populus trichocarpa]                                                 |
| 917  | 19566 | gi 566199275 | 41.83 | 4  | 1 | 1 |                      | 38655 | hypothetical protein POPTR_0013s03740g [Populus trichocarpa]                                                      |
| 1250 | 723   | gi 731370529 | 41.56 | 2  | 1 | 1 |                      | 66006 | PREDICTED: serine/threonine-protein phosphatase 2A 65 kDa regulatory subunit A beta isoform-like [Vitis vinifera] |
| 1512 | 2259  | gi 225431922 | 41.42 | 13 | 1 | 1 |                      | 13225 | PREDICTED: DNA-directed RNA polymerases II IV and V subunit 9A [Vitis vinifera]                                   |



|      |       |              |       |    |   |   |                      |        |                                                                                                 |
|------|-------|--------------|-------|----|---|---|----------------------|--------|-------------------------------------------------------------------------------------------------|
| 1511 | 2099  | gi 225426826 | 41.29 | 4  | 1 | 1 |                      | 36763  | PREDICTED: replication factor C subunit 2 [Vitis vinifera]                                      |
| 1485 | 19087 | gi 566258212 | 41.24 | 7  | 1 | 1 |                      | 24279  | hypothetical protein POPTR_0115s00200g partial [Populus trichocarpa]                            |
| 416  | 1128  | gi 731418015 | 41.09 | 2  | 1 | 1 |                      | 53972  | PREDICTED: tryptophan synthase beta chain 1 [Vitis vinifera]                                    |
| 682  | 1352  | gi 225428908 | 41.04 | 1  | 1 | 1 |                      | 53765  | PREDICTED: limonoid UDP-glucosyltransferase [Vitis vinifera]                                    |
| 1212 | 341   | gi 731391907 | 41.04 | 2  | 1 | 1 |                      | 67493  | PREDICTED: anthranilate synthase alpha subunit 2 chloroplastic isoform X2 [Vitis vinifera]      |
| 1808 | 61284 | gi 224144643 | 40.83 | 4  | 1 | 1 |                      | 40333  | hypothetical protein POPTR_0019s04130g [Populus trichocarpa]                                    |
| 1463 | 758   | gi 225430549 | 40.72 | 1  | 1 | 1 |                      | 82761  | PREDICTED: eukaryotic translation initiation factor 3 subunit B [Vitis vinifera]                |
| 568  | 43788 | gi 552546256 | 40.65 | 21 | 1 | 1 |                      | 4424   | cytochrome b559 beta subunit (chloroplast) [Camellia pitardii]                                  |
| 1756 | 1933  | gi 225455762 | 40.5  | 2  | 1 | 1 |                      | 67078  | PREDICTED: probable phenylalanine--tRNA ligase beta subunit [Vitis vinifera]                    |
| 1397 | 1173  | gi 731393107 | 40.37 | 1  | 1 | 1 |                      | 108073 | PREDICTED: DNA (cytosine-5)-methyltransferase CMT3 [Vitis vinifera]                             |
| 994  | 19883 | gi 566189043 | 40.24 | 4  | 1 | 1 | Carbamidomethylation | 36173  | Peroxidase 6 precursor family protein [Populus trichocarpa]                                     |
| 1071 | 600   | gi 359490767 | 40.08 | 5  | 1 | 1 |                      | 23070  | PREDICTED: nascent polypeptide-associated complex subunit alpha-like protein 2 [Vitis vinifera] |
| 744  | 2032  | gi 359474652 | 40.07 | 2  | 1 | 1 |                      | 50670  | PREDICTED: scopoletin glucosyltransferase-like [Vitis vinifera]                                 |

|      |       |              |       |    |   |   |                      |       |                                                                                        |
|------|-------|--------------|-------|----|---|---|----------------------|-------|----------------------------------------------------------------------------------------|
| 1327 | 17711 | gi 224122948 | 40    | 2  | 2 | 2 |                      | 79226 | inorganic pyrophosphatase family protein [Populus trichocarpa]                         |
| 1334 | 18960 | gi 566255736 | 39.92 | 5  | 1 | 1 |                      | 15873 | hypothetical protein POPTR_0483s00200g partial [Populus trichocarpa]                   |
| 1332 | 20744 | gi 566189812 | 39.68 | 2  | 1 | 1 | Carbamidomethylation | 50971 | N-carbamyl-L-amino acid hydrolase family protein [Populus trichocarpa]                 |
| 1301 | 61101 | gi 566151634 | 39.59 | 2  | 1 | 1 | Carbamidomethylation | 50974 | hypothetical protein POPTR_0001s29250g [Populus trichocarpa]                           |
| 1333 | 61311 | gi 566256321 | 39.54 | 7  | 1 | 1 |                      | 12448 | glycine-rich RNA-binding family protein [Populus trichocarpa]                          |
| 1805 | 1371  | gi 225469850 | 38.85 | 2  | 1 | 1 |                      | 39160 | PREDICTED: uncharacterized protein DDB_G0288133 [Vitis vinifera]                       |
| 1179 | 17054 | gi 566183505 | 38.79 | 3  | 1 | 1 | Carbamidomethylation | 65372 | phosphatase family protein [Populus trichocarpa]                                       |
| 1425 | 793   | gi 225428898 | 38.59 | 3  | 2 | 2 |                      | 62556 | PREDICTED: D-3-phosphoglycerate dehydrogenase 1 chloroplastic [Vitis vinifera]         |
| 1410 | 362   | gi 225464186 | 38.53 | 3  | 1 | 1 | Carbamidomethylation | 49585 | PREDICTED: 26S proteasome regulatory subunit 4 homolog B [Vitis vinifera]              |
| 1309 | 2613  | gi 731380876 | 38.36 | 6  | 2 | 1 |                      | 30353 | PREDICTED: mitochondrial carnitine/acylcarnitine carrier-like protein [Vitis vinifera] |
| 1207 | 1616  | gi 225426330 | 38.34 | 5  | 1 | 1 |                      | 34913 | PREDICTED: 26S proteasome non-ATPase regulatory subunit 7 homolog A [Vitis vinifera]   |
| 1311 | 29791 | gi 224140057 | 38.31 | 3  | 1 | 1 |                      | 29642 | alcohol dehydroge family protein [Populus trichocarpa]                                 |
| 1290 | 18418 | gi 566234529 | 38.21 | 12 | 1 | 1 |                      | 13103 | hypothetical protein POPTR_0019s07730g [Populus trichocarpa]                           |

|      |       |              |       |   |   |   |  |        |                                                                                                       |
|------|-------|--------------|-------|---|---|---|--|--------|-------------------------------------------------------------------------------------------------------|
| 167  | 61202 | gi 566152126 | 38.02 | 2 | 1 | 1 |  | 51807  | hypothetical protein POPTR_0001s31980g [Populus trichocarpa]                                          |
| 1009 | 19977 | gi 225456262 | 37.9  | 9 | 1 | 1 |  | 11952  | PREDICTED: mitochondrial pyruvate carrier 1 [Vitis vinifera]                                          |
| 1861 | 19941 | gi 566186111 | 37.74 | 8 | 1 | 1 |  | 12191  | hypothetical protein POPTR_0009s03520g partial [Populus trichocarpa]                                  |
| 1757 | 261   | gi 225458173 | 37.66 | 4 | 1 | 1 |  | 44535  | PREDICTED: 26S protease regulatory subunit S10B homolog B [Vitis vinifera]                            |
| 934  | 29335 | gi 225466271 | 37.4  | 5 | 1 | 1 |  | 21853  | PREDICTED: ras-related protein Rab5 [Vitis vinifera]                                                  |
| 1176 | 21187 | gi 225452785 | 37.39 | 4 | 1 | 1 |  | 29509  | PREDICTED: NAP1-related protein 2 [Vitis vinifera]                                                    |
| 963  | 2148  | gi 225450543 | 37.38 | 5 | 1 | 1 |  | 18729  | PREDICTED: uncharacterized protein LOC100245914 [Vitis vinifera]                                      |
| 1286 | 17395 | gi 224074998 | 37.18 | 2 | 2 | 2 |  | 100185 | hypothetical protein POPTR_0003s13040g [Populus trichocarpa]                                          |
| 1230 | 2245  | gi 731381456 | 37.13 | 3 | 1 | 1 |  | 34629  | PREDICTED: translocase of chloroplast 34 chloroplastic isoform X2 [Vitis vinifera]                    |
| 1563 | 18220 | gi 566152765 | 37.06 | 3 | 1 | 1 |  | 49287  | hypothetical protein POPTR_0001s34620g [Populus trichocarpa]                                          |
| 1032 | 1444  | gi 731435761 | 37.03 | 1 | 1 | 1 |  | 160776 | PREDICTED: putative disease resistance RPP13-like protein 1 isoform X1 [Vitis vinifera]               |
| 505  | 2666  | gi 225449032 | 37.01 | 2 | 1 | 1 |  | 52590  | PREDICTED: dolichyl-diphosphooligosaccharide--protein glycosyltransferase subunit 1B [Vitis vinifera] |
| 1206 | 20108 | gi 566158274 | 36.98 | 3 | 1 | 1 |  | 34050  | hypothetical protein POPTR_0002s15960g [Populus trichocarpa]                                          |

|      |       |              |       |   |   |   |                      |        |                                                                           |
|------|-------|--------------|-------|---|---|---|----------------------|--------|---------------------------------------------------------------------------|
| 1083 | 44615 | gi 566258388 | 36.3  | 1 | 2 | 1 |                      | 194544 | hypothetical protein POPTR_0101s00210g [Populus trichocarpa]              |
| 1809 | 17815 | gi 566187112 | 36.26 | 2 | 1 | 1 |                      | 38128  | WD-40 repeat family protein [Populus trichocarpa]                         |
| 1513 | 71220 | gi 566172749 | 36.26 | 2 | 1 | 1 |                      | 38756  | GDSL-motif lipase/hydrolase family protein [Populus trichocarpa]          |
| 1486 | 61313 | gi 566148380 | 36.18 | 4 | 1 | 1 |                      | 23562  | hypothetical protein POPTR_0001s11260g partial [Populus trichocarpa]      |
| 1095 | 18691 | gi 671743260 | 36.1  | 4 | 1 | 1 |                      | 24165  | cytochrome b6 (chloroplast) [Camellia petelotii]                          |
| 1056 | 622   | gi 731385628 | 36.07 | 1 | 1 | 1 |                      | 99551  | PREDICTED: heat shock 70 kDa protein 17 [Vitis vinifera]                  |
| 1288 | 18332 | gi 224107655 | 35.91 | 3 | 1 | 1 |                      | 33896  | 3-oxoacyl-[acyl-carrier-protein] reductase [Populus trichocarpa]          |
| 1231 | 19835 | gi 224066547 | 35.88 | 6 | 1 | 1 |                      | 19367  | photosystem 2 family protein [Populus trichocarpa]                        |
| 1759 | 29214 | gi 224145927 | 35.84 | 2 | 1 | 1 | Carbamidomethylation | 61923  | 4-coumarate-CoA ligase family protein [Populus trichocarpa]               |
| 1862 | 18956 | gi 566162026 | 35.71 | 6 | 1 | 1 | Carbamidomethylation | 27183  | hypothetical protein POPTR_0003s10720g [Populus trichocarpa]              |
| 1688 | 2594  | gi 731382912 | 35.67 | 1 | 1 | 1 |                      | 81725  | PREDICTED: subtilisin-like protease [Vitis vinifera]                      |
| 1810 | 19721 | gi 566206526 | 35.66 | 6 | 1 | 1 |                      | 23501  | hypothetical protein POPTR_0015s07940g [Populus trichocarpa]              |
| 1108 | 61448 | gi 225453275 | 35.39 | 4 | 1 | 1 | Carbamidomethylation | 14633  | PREDICTED: 20 kDa chaperonin chloroplastic [Vitis vinifera]               |
| 1000 | 737   | gi 225424719 | 35.37 | 1 | 1 | 1 |                      | 78467  | PREDICTED: threonine--tRNA ligase mitochondrial [Vitis vinifera]          |
| 1335 | 61183 | gi 731438465 | 35.1  | 3 | 1 | 1 |                      | 26979  | PREDICTED: 3-isopropylmalate dehydratase small subunit 3 [Vitis vinifera] |

|      |       |              |       |   |   |   |                      |        |                                                                                       |
|------|-------|--------------|-------|---|---|---|----------------------|--------|---------------------------------------------------------------------------------------|
| 886  | 43827 | gi 731410026 | 35.04 | 3 | 1 | 1 |                      | 33957  | PREDICTED: protein THYLAKOID FORMATION1 chloroplastic isoform X2 [Vitis vinifera]     |
| 1863 | 681   | gi 731422501 | 34.74 | 1 | 1 | 1 |                      | 125527 | PREDICTED: protein TOPLESS isoform X1 [Vitis vinifera]                                |
| 1638 | 1104  | gi 731435142 | 34.52 | 1 | 1 | 1 |                      | 84036  | PREDICTED: protein ROOT HAIR DEFECTIVE 3 homolog 2 isoform X2 [Vitis vinifera]        |
| 1384 | 1214  | gi 731426684 | 34.49 | 1 | 1 | 1 |                      | 144086 | PREDICTED: uncharacterized protein LOC100262718 isoform X4 [Vitis vinifera]           |
| 1266 | 71076 | gi 224059096 | 34.37 | 2 | 2 | 1 |                      | 84678  | GLABRA 2 family protein [Populus trichocarpa]                                         |
| 592  | 1621  | gi 225431409 | 34.32 | 2 | 1 | 1 |                      | 39072  | PREDICTED: probable mannitol dehydrogenase [Vitis vinifera]                           |
| 1111 | 47263 | gi 225453793 | 34.29 | 1 | 1 | 1 |                      | 328472 | PREDICTED: uncharacterized protein LOC100247154 [Vitis vinifera]                      |
| 1222 | 2913  | gi 359476206 | 34.17 | 2 | 1 | 1 |                      | 50104  | PREDICTED: protein ASPARTIC PROTEASE IN GUARD CELL 2-like isoform X2 [Vitis vinifera] |
| 1336 | 1321  | gi 225424750 | 33.97 | 7 | 1 | 1 | Carbamidomethylation | 11841  | PREDICTED: gibberellin-regulated protein 11 [Vitis vinifera]                          |
| 1432 | 1377  | gi 225452877 | 33.92 | 3 | 1 | 1 |                      | 57074  | PREDICTED: cystathionine gamma-synthase chloroplastic [Vitis vinifera]                |
| 926  | 463   | gi 731398611 | 33.9  | 2 | 1 | 1 |                      | 43372  | PREDICTED: proliferation-associated protein 2G4 [Vitis vinifera]                      |
| 1312 | 61282 | gi 359484939 | 33.62 | 1 | 1 | 1 | Carbamidomethylation | 109209 | PREDICTED: L-arabinokinase-like isoform X1 [Vitis vinifera]                           |
| 1145 | 2039  | gi 225449198 | 33.59 | 4 | 1 | 1 |                      | 31414  | PREDICTED: eukaryotic translation initiation factor 3 subunit F [Vitis vinifera]      |

|      |       |              |       |    |   |   |                      |        |                                                                                       |
|------|-------|--------------|-------|----|---|---|----------------------|--------|---------------------------------------------------------------------------------------|
| 1442 | 25197 | gi 566215197 | 33.42 | 2  | 1 | 1 |                      | 96019  | hypothetical protein POPTR_0018s10680g [Populus trichocarpa]                          |
| 795  | 18582 | gi 566156002 | 33.27 | 2  | 1 | 1 |                      | 37272  | hypothetical protein POPTR_0002s03260g [Populus trichocarpa]                          |
| 1180 | 2753  | gi 225429582 | 33.2  | 1  | 1 | 1 |                      | 98913  | PREDICTED: aminopeptidase M1 [Vitis vinifera]                                         |
| 581  | 6004  | gi 731413856 | 33.17 | 1  | 2 | 2 |                      | 155634 | PREDICTED: TMV resistance protein N-like [Vitis vinifera]                             |
| 1864 | 71225 | gi 359487009 | 33.14 | 1  | 1 | 1 |                      | 104506 | PREDICTED: serine/threonine-protein phosphatase BSL3-like isoform X1 [Vitis vinifera] |
| 1299 | 19552 | gi 731395258 | 32.93 | 6  | 1 | 1 |                      | 14682  | PREDICTED: U6 snRNA-associated Sm-like protein LSm2 [Vitis vinifera]                  |
| 1337 | 28945 | gi 225445462 | 32.83 | 7  | 1 | 1 |                      | 14555  | PREDICTED: uncharacterized protein At2g34160 [Vitis vinifera]                         |
| 1514 | 30061 | gi 566197758 | 32.67 | 10 | 1 | 1 |                      | 11735  | hypothetical protein POPTR_0012s10210g partial [Populus trichocarpa]                  |
| 1213 | 19793 | gi 566181894 | 32.49 | 2  | 1 | 1 |                      | 58001  | hypothetical protein POPTR_0008s02250g [Populus trichocarpa]                          |
| 1515 | 3083  | gi 225443150 | 32.22 | 11 | 1 | 1 |                      | 9286   | PREDICTED: uncharacterized protein LOC100262209 [Vitis vinifera]                      |
| 1866 | 1567  | gi 225433215 | 32.05 | 6  | 1 | 1 | Carbamidomethylation | 26277  | PREDICTED: DAG protein chloroplastic [Vitis vinifera]                                 |
| 1867 | 20184 | gi 566187829 | 31.44 | 1  | 1 | 1 |                      | 53103  | hypothetical protein POPTR_0009s13560g [Populus trichocarpa]                          |
| 944  | 18241 | gi 566146307 | 31.35 | 3  | 2 | 1 |                      | 66102  | monocopper oxidase precursor family protein [Populus trichocarpa]                     |
| 989  | 21244 | gi 566177163 | 31.24 | 2  | 1 | 1 |                      | 82625  | UBIQUITIN-SPECIFIC PROTEASE 23 family protein [Populus trichocarpa]                   |

|      |       |              |       |   |   |   |                      |        |                                                                                                |
|------|-------|--------------|-------|---|---|---|----------------------|--------|------------------------------------------------------------------------------------------------|
| 1241 | 1860  | gi 359474339 | 31.11 | 3 | 1 | 1 |                      | 45436  | PREDICTED: probable transaldolase isoform X1 [Vitis vinifera]                                  |
| 1001 | 2681  | gi 225455153 | 30.66 | 4 | 1 | 1 |                      | 26938  | PREDICTED: mitochondrial import inner membrane translocase subunit TIM22-like [Vitis vinifera] |
| 1315 | 18000 | gi 526118245 | 30.54 | 3 | 1 | 1 | Carbamidomethylation | 23461  | peroxiredoxin Q [Vitis vinifera]                                                               |
| 1107 | 71241 | gi 731386048 | 30.3  | 3 | 1 | 1 |                      | 26122  | PREDICTED: calcium uptake protein 3 mitochondrial-like [Vitis vinifera]                        |
| 1080 | 71174 | gi 566156540 | 29.96 | 1 | 1 | 1 |                      | 114460 | hypothetical protein POPTR_0002s06380g partial [Populus trichocarpa]                           |
| 964  | 17552 | gi 566205234 | 29.72 | 5 | 1 | 1 |                      | 24533  | hypothetical protein POPTR_0015s00570g [Populus trichocarpa]                                   |
| 1277 | 5139  | gi 731404419 | 29.57 | 3 | 1 | 1 | Carbamidomethylation | 54013  | PREDICTED: monothiol glutaredoxin-S17 isoform X1 [Vitis vinifera]                              |
| 1072 | 1404  | gi 225437172 | 29.53 | 3 | 1 | 1 |                      | 38410  | PREDICTED: 2-methyl-6-phytyl-1 4-hydroquinone methyltransferase chloroplastic [Vitis vinifera] |
| 1251 | 17479 | gi 224097148 | 28.95 | 2 | 1 | 1 |                      | 41439  | GDP-mannose 4 family protein [Populus trichocarpa]                                             |
| 1517 | 19012 | gi 566155909 | 28.62 | 3 | 1 | 1 |                      | 57213  | hypothetical protein POPTR_0002s02740g [Populus trichocarpa]                                   |
| 1209 | 17486 | gi 224067419 | 28.51 | 1 | 1 | 1 |                      | 69742  | malate oxidoreductase family protein [Populus trichocarpa]                                     |
| 1516 | 71248 | gi 225456818 | 28.39 | 4 | 1 | 1 |                      | 21329  | PREDICTED: peptide methionine sulfoxide reductase [Vitis vinifera]                             |
| 1165 | 20117 | gi 224129342 | 28.25 | 4 | 1 | 1 |                      | 22803  | Photosystem I reaction center subunit XI family protein [Populus trichocarpa]                  |
| 1443 | 24392 | gi 526118271 | 28.2  | 7 | 1 | 1 |                      | 12001  | peptidyl-prolyl isomerase FKBP12-like [Vitis vinifera]                                         |

|      |       |              |       |   |   |   |                      |        |                                                                             |
|------|-------|--------------|-------|---|---|---|----------------------|--------|-----------------------------------------------------------------------------|
| 1037 | 19762 | gi 566161718 | 28.18 | 3 | 1 | 1 |                      | 43721  | UBIQUITIN-SPECIFIC<br>PROTEASE 20 family protein<br>[Populus trichocarpa]   |
| 1868 | 48485 | gi 224107257 | 27.91 | 1 | 1 | 1 |                      | 93079  | hypothetical protein<br>POPTR_0010s03030g [Populus<br>trichocarpa]          |
| 1662 | 18462 | gi 566192083 | 27.6  | 1 | 1 | 1 | Carbamidomethylation | 111427 | transport protein Sec24 [Populus<br>trichocarpa]                            |
| 1806 | 71161 | gi 566149517 | 27.54 | 1 | 1 | 1 |                      | 69963  | hypothetical protein<br>POPTR_0001s17110g [Populus<br>trichocarpa]          |
| 1338 | 17506 | gi 566243399 | 27.45 | 3 | 1 | 1 |                      | 33846  | hypothetical protein<br>POPTR_0019s13040g [Populus<br>trichocarpa]          |
| 820  | 71291 | gi 566182405 | 27.44 | 3 | 1 | 1 |                      | 23297  | hypothetical protein<br>POPTR_0008s04920g [Populus<br>trichocarpa]          |
| 1518 | 71296 | gi 566206075 | 27.39 | 1 | 1 | 1 |                      | 59345  | hypothetical protein<br>POPTR_0015s05820g [Populus<br>trichocarpa]          |
| 1869 | 71275 | gi 566155466 | 27.27 | 2 | 1 | 1 |                      | 44474  | hypothetical protein<br>POPTR_0002s00230g [Populus<br>trichocarpa]          |
| 1047 | 20307 | gi 566167359 | 27.27 | 4 | 1 | 1 |                      | 15952  | hypothetical protein<br>POPTR_0004s19310g [Populus<br>trichocarpa]          |
| 1046 | 5258  | gi 359489366 | 26.76 | 2 | 1 | 1 |                      | 42909  | PREDICTED: fasciclin-like<br>arabinogalactan protein 10 [Vitis<br>vinifera] |
| 1689 | 1929  | gi 731421066 | 26.75 | 2 | 1 | 1 |                      | 33932  | PREDICTED: probable<br>fructokinase-7 isoform X2 [Vitis<br>vinifera]        |
| 927  | 18810 | gi 566209344 | 26.74 | 3 | 1 | 1 |                      | 27361  | In2-1 family protein [Populus<br>trichocarpa]                               |
| 1270 | 30727 | gi 359473558 | 26.69 | 3 | 1 | 1 |                      | 39906  | PREDICTED: uncharacterized<br>protein LOC100853782 [Vitis<br>vinifera]      |
| 1429 | 2813  | gi 225427973 | 26.49 | 3 | 1 | 1 |                      | 19853  | PREDICTED: glycine-rich<br>protein 2-like [Vitis vinifera]                  |



|      |       |              |       |   |   |   |                      |        |                                                                                       |
|------|-------|--------------|-------|---|---|---|----------------------|--------|---------------------------------------------------------------------------------------|
| 1870 | 2631  | gi 225450051 | 26.48 | 3 | 1 | 1 |                      | 39579  | PREDICTED: cycloartenol-C-24-methyltransferase [Vitis vinifera]                       |
| 1121 | 46515 | gi 566155205 | 26.19 | 1 | 1 | 1 |                      | 59386  | hypothetical protein POPTR_0001s46360g [Populus trichocarpa]                          |
| 576  | 3274  | gi 526117984 | 26.18 | 3 | 1 | 1 |                      | 21537  | uncharacterized protein LOC100265927 [Vitis vinifera]                                 |
| 1438 | 6691  | gi 225437318 | 26.17 | 1 | 1 | 1 |                      | 157286 | PREDICTED: translocase of chloroplast 159 chloroplastic [Vitis vinifera]              |
| 1167 | 20075 | gi 224092174 | 25.94 | 4 | 1 | 1 |                      | 36141  | hypothetical protein POPTR_0006s24360g [Populus trichocarpa]                          |
| 1487 | 61392 | gi 225464932 | 25.45 | 7 | 1 | 1 |                      | 12133  | PREDICTED: uncharacterized protein At2g27730 mitochondrial [Vitis vinifera]           |
| 1289 | 4188  | gi 731375647 | 25.44 | 0 | 1 | 1 |                      | 320504 | PREDICTED: LOW QUALITY PROTEIN: uncharacterized protein LOC100265010 [Vitis vinifera] |
| 1340 | 61530 | gi 566256423 | 25.44 | 2 | 1 | 1 |                      | 40507  | hypothetical protein POPTR_0306s00210g [Populus trichocarpa]                          |
| 1813 | 35612 | gi 731418622 | 25.43 | 3 | 1 | 1 | Carbamidomethylation | 36326  | PREDICTED: peroxidase 55-like [Vitis vinifera]                                        |
| 1814 | 71263 | gi 225446625 | 25.38 | 1 | 1 | 1 |                      | 57567  | PREDICTED: uncharacterized protein LOC100267778 [Vitis vinifera]                      |
| 1305 | 17749 | gi 566170400 | 25.28 | 4 | 1 | 1 |                      | 42882  | hypothetical protein POPTR_0005s09680g [Populus trichocarpa]                          |
| 1317 | 61434 | gi 566168420 | 24.69 | 3 | 1 | 1 |                      | 41147  | hypothetical protein POPTR_0004s24220g [Populus trichocarpa]                          |
| 1519 | 71338 | gi 224136978 | 24.37 | 6 | 1 | 1 |                      | 20524  | ADP-ribosylation factor family protein [Populus trichocarpa]                          |
| 1074 | 25166 | gi 566207323 | 24.26 | 1 | 1 | 1 |                      | 61858  | hypothetical protein POPTR_0015s12920g [Populus trichocarpa]                          |

|      |       |              |       |   |   |   |                      |        |                                                                                           |
|------|-------|--------------|-------|---|---|---|----------------------|--------|-------------------------------------------------------------------------------------------|
| 334  | 71256 | gi 224141723 | 24.22 | 1 | 1 | 1 |                      | 107028 | leucine-rich repeat<br>transmembrane protein kinase<br>[Populus trichocarpa]              |
| 1448 | 33635 | gi 225441979 | 24.09 | 1 | 1 | 1 |                      | 63296  | PREDICTED: pectinesterase 3<br>[Vitis vinifera]                                           |
| 870  | 1307  | gi 225463506 | 24.01 | 2 | 1 | 1 |                      | 38294  | PREDICTED: fructose-<br>biphosphate aldolase<br>cytoplasmic isozyme 1 [Vitis<br>vinifera] |
| 1871 | 29683 | gi 566197448 | 23.93 | 9 | 1 | 1 | Carbamidomethylation | 12293  | hypothetical protein<br>POPTR_0012s08450g [Populus<br>trichocarpa]                        |
| 1168 | 1670  | gi 225436339 | 23.25 | 2 | 1 | 1 |                      | 45109  | PREDICTED: arogenate<br>dehydratase 3 chloroplastic<br>[Vitis vinifera]                   |
| 1764 | 17863 | gi 566211408 | 23.2  | 2 | 1 | 1 |                      | 37992  | hypothetical protein<br>POPTR_0017s04750g [Populus<br>trichocarpa]                        |
| 1489 | 30408 | gi 359474260 | 23.15 | 1 | 1 | 1 |                      | 62968  | PREDICTED: protein<br>HOTHEAD [Vitis vinifera]                                            |
| 1019 | 71324 | gi 731427792 | 23.11 | 1 | 1 | 1 |                      | 64758  | PREDICTED: serine/threonine-<br>protein kinase TNNI3K-like<br>isoform X2 [Vitis vinifera] |
| 1002 | 71427 | gi 225463990 | 22.61 | 3 | 1 | 1 |                      | 29642  | PREDICTED: transcription<br>repressor MYB6 [Vitis vinifera]                               |
| 1874 | 71387 | gi 566257303 | 22.51 | 1 | 1 | 1 |                      | 78394  | hypothetical protein<br>POPTR_0163s00240g [Populus<br>trichocarpa]                        |
| 1169 | 23587 | gi 731388704 | 22.37 | 1 | 1 | 1 |                      | 112307 | PREDICTED: uncharacterized<br>protein LOC104879229 isoform<br>X1 [Vitis vinifera]         |
| 810  | 996   | gi 526117499 | 22.32 | 2 | 1 | 1 |                      | 44546  | glutamate dehydrogenase [Vitis<br>vinifera]                                               |
| 1292 | 71337 | gi 566172843 | 22.28 | 0 | 1 | 1 |                      | 168481 | hypothetical protein<br>POPTR_0005s23270g [Populus<br>trichocarpa]                        |
| 1567 | 71178 | gi 552541020 | 22.16 | 0 | 1 | 1 |                      | 269112 | Ycf2 (chloroplast) [Camellia<br>yunnanensis]                                              |

|      |       |              |       |   |   |   |  |        |                                                                                                  |
|------|-------|--------------|-------|---|---|---|--|--------|--------------------------------------------------------------------------------------------------|
| 1185 | 44567 | gi 731440108 | 21.99 | 1 | 1 | 1 |  | 128768 | PREDICTED: uncharacterized protein At4g38062-like partial [Vitis vinifera]                       |
| 1435 | 71177 | gi 566177799 | 21.92 | 1 | 1 | 1 |  | 146475 | hypothetical protein POPTR_0006s23660g [Populus trichocarpa]                                     |
| 1189 | 71348 | gi 731437744 | 21.9  | 1 | 1 | 1 |  | 95541  | PREDICTED: probable LRR receptor-like serine/threonine-protein kinase At1g12460 [Vitis vinifera] |
| 953  | 3188  | gi 225462357 | 21.73 | 3 | 1 | 1 |  | 25816  | PREDICTED: probable glutathione S-transferase [Vitis vinifera]                                   |
| 1062 | 1772  | gi 225451677 | 21.7  | 1 | 1 | 1 |  | 108901 | PREDICTED: staphylococcal nuclease domain-containing protein 1 [Vitis vinifera]                  |
| 1641 | 71199 | gi 566165455 | 21.65 | 1 | 1 | 1 |  | 121979 | hypothetical protein POPTR_0004s07590g [Populus trichocarpa]                                     |
| 822  | 20285 | gi 566209825 | 21.58 | 1 | 1 | 1 |  | 60999  | hypothetical protein POPTR_0016s11950g [Populus trichocarpa]                                     |
| 1109 | 17994 | gi 566158382 | 21.56 | 1 | 1 | 1 |  | 77765  | hypothetical protein POPTR_0002s16570g [Populus trichocarpa]                                     |
| 1724 | 48211 | gi 224115854 | 21.49 | 1 | 1 | 1 |  | 110333 | hypothetical protein POPTR_0011s01420g [Populus trichocarpa]                                     |
| 1602 | 1733  | gi 225429462 | 21.4  | 1 | 1 | 1 |  | 71749  | PREDICTED: far upstream element-binding protein 2 [Vitis vinifera]                               |
| 1817 | 24599 | gi 566202327 | 21.16 | 3 | 1 | 1 |  | 58845  | hypothetical protein POPTR_0014s03820g [Populus trichocarpa]                                     |
| 1291 | 62031 | gi 566168097 | 21.07 | 1 | 1 | 1 |  | 132788 | hypothetical protein POPTR_0004s22740g [Populus trichocarpa]                                     |
| 1621 | 17724 | gi 566176622 | 21.07 | 1 | 1 | 1 |  | 56966  | asparaginyl-tRNA synthetase family protein [Populus trichocarpa]                                 |

|      |       |              |       |   |   |   |                      |        |                                                                              |
|------|-------|--------------|-------|---|---|---|----------------------|--------|------------------------------------------------------------------------------|
| 1343 | 1898  | gi 225449068 | 21.03 | 2 | 1 | 1 |                      | 47175  | PREDICTED: chorismate synthase 1 chloroplastic [Vitis vinifera]              |
| 1879 | 71556 | gi 225427782 | 20.79 | 1 | 1 | 1 |                      | 77493  | PREDICTED: arginine decarboxylase [Vitis vinifera]                           |
| 1877 | 71487 | gi 225443827 | 20.68 | 2 | 1 | 1 |                      | 37115  | PREDICTED: senescence-specific cysteine protease SAG39-like [Vitis vinifera] |
| 1386 | 1387  | gi 225427288 | 20.67 | 2 | 1 | 1 |                      | 68795  | PREDICTED: dynamin-related protein 1E [Vitis vinifera]                       |
| 1437 | 71208 | gi 359494168 | 20.63 | 1 | 1 | 1 |                      | 165261 | PREDICTED: ABC transporter C family member 3-like [Vitis vinifera]           |
| 1124 | 71379 | gi 225452124 | 20.47 | 5 | 1 | 1 | Carbamidomethylation | 28914  | PREDICTED: zinc finger CCCH domain-containing protein 15 [Vitis vinifera]    |

Table S3 The identified proteins in HY1

| Protein Group | Protein ID | Accession    | -10lgP | Coverage (%) | #Peptides | #Unique | PTM                                 | Avg. Mass | Description                                                                        |
|---------------|------------|--------------|--------|--------------|-----------|---------|-------------------------------------|-----------|------------------------------------------------------------------------------------|
| 3             | 6          | gi 359495606 | 312.86 | 54           | 48        | 3       | Carbamidomethylation; Oxidation (M) | 80006     | PREDICTED: heat shock cognate protein 80 [Vitis vinifera]                          |
| 7             | 7          | gi 225462013 | 308.16 | 50           | 45        | 3       | Carbamidomethylation                | 80849     | PREDICTED: heat shock cognate protein 80-like [Vitis vinifera]                     |
| 6             | 1          | gi 225426385 | 301.85 | 75           | 34        | 1       | Carbamidomethylation; Oxidation (M) | 50292     | PREDICTED: tubulin beta-2 chain [Vitis vinifera]                                   |
| 1             | 16386      | gi 669100005 | 300.66 | 76           | 41        | 41      | Carbamidomethylation; Oxidation (M) | 52635     | ribulose biphosphate carboxylase large chain (chloroplast) [Camellia crapnelliana] |
| 10            | 16400      | gi 224090883 | 296.85 | 71           | 32        | 1       | Carbamidomethylation; Oxidation (M) | 49907     | hypothetical protein POPTR_0006s09610g [Populus trichocarpa]                       |
| 2             | 16404      | gi 224055984 | 294.41 | 72           | 25        | 3       | Carbamidomethylation                | 41696     | actin family protein [Populus trichocarpa]                                         |
| 12            | 8          | gi 225426164 | 294.17 | 41           | 35        | 2       | Carbamidomethylation                | 80852     | PREDICTED: heat shock protein 83 [Vitis vinifera]                                  |
| 22            | 16395      | gi 566195847 | 292.67 | 61           | 30        | 1       | Carbamidomethylation; Oxidation (M) | 50164     | tubulin beta chain family protein [Populus trichocarpa]                            |
| 18            | 15         | gi 225464589 | 292.66 | 42           | 35        | 1       | Carbamidomethylation                | 80868     | PREDICTED: heat shock protein 83-like [Vitis vinifera]                             |
| 24            | 5          | gi 359486799 | 288.83 | 57           | 39        | 2       | Carbamidomethylation; Oxidation (M) | 71171     | PREDICTED: heat shock cognate 70 kDa protein 2 [Vitis vinifera]                    |
| 28            | 10         | gi 225434984 | 288.39 | 60           | 40        | 1       | Carbamidomethylation; Oxidation (M) | 71235     | PREDICTED: heat shock cognate 70 kDa protein 2 [Vitis vinifera]                    |

|    |       |              |        |    |    |   |                                     |       |                                                                 |
|----|-------|--------------|--------|----|----|---|-------------------------------------|-------|-----------------------------------------------------------------|
| 17 | 16417 | gi 224056837 | 283.71 | 41 | 38 | 1 | Carbamidomethylation                | 80026 | hypothetical protein POPTR_0001s47020g [Populus trichocarpa]    |
| 42 | 16411 | gi 224100971 | 280.96 | 57 | 36 | 1 | Carbamidomethylation; Oxidation (M) | 71117 | heat shock protein 70 cognate [Populus trichocarpa]             |
| 43 | 18    | gi 225452767 | 279.2  | 66 | 27 | 3 | Carbamidomethylation                | 49622 | PREDICTED: tubulin alpha chain [Vitis vinifera]                 |
| 32 | 16    | gi 225440324 | 278.2  | 48 | 36 | 1 | Carbamidomethylation; Oxidation (M) | 71066 | PREDICTED: heat shock cognate 70 kDa protein 2 [Vitis vinifera] |
| 33 | 16410 | gi 566191989 | 276.59 | 57 | 38 | 1 | Carbamidomethylation; Oxidation (M) | 71140 | heat shock protein 70 cognate [Populus trichocarpa]             |
| 27 | 23    | gi 225456143 | 269.2  | 60 | 28 | 1 | Carbamidomethylation                | 49779 | PREDICTED: tubulin beta chain [Vitis vinifera]                  |
| 29 | 17    | gi 225434722 | 267    | 61 | 30 | 2 | Carbamidomethylation                | 50275 | PREDICTED: tubulin beta-2 chain [Vitis vinifera]                |
| 8  | 16442 | gi 224056705 | 265.77 | 55 | 21 | 1 | Carbamidomethylation                | 41636 | actin family protein [Populus trichocarpa]                      |
| 76 | 36    | gi 225426230 | 255.68 | 39 | 33 | 1 | Carbamidomethylation                | 73581 | PREDICTED: luminal-binding protein 5 [Vitis vinifera]           |
| 14 | 16499 | gi 224117708 | 255.49 | 55 | 18 | 1 | Carbamidomethylation                | 40618 | actin family protein [Populus trichocarpa]                      |
| 62 | 16494 | gi 566146990 | 246.59 | 29 | 22 | 1 | Carbamidomethylation; Oxidation (M) | 71882 | heat shock protein 70 cognate [Populus trichocarpa]             |
| 52 | 16430 | gi 566232573 | 243.67 | 33 | 26 | 1 | Carbamidomethylation                | 85012 | hypothetical protein POPTR_0019s05430g [Populus trichocarpa]    |
| 73 | 46    | gi 225445820 | 241.65 | 30 | 21 | 1 | Carbamidomethylation                | 71402 | PREDICTED: heat shock 70 kDa protein [Vitis vinifera]           |

|     |       |              |        |    |    |    |                                     |       |                                                                                                   |
|-----|-------|--------------|--------|----|----|----|-------------------------------------|-------|---------------------------------------------------------------------------------------------------|
| 40  | 88    | gi 225426414 | 239.23 | 43 | 21 | 1  | Carbamidomethylation                | 50055 | PREDICTED: tubulin beta chain [Vitis vinifera]                                                    |
| 49  | 33    | gi 225437708 | 238.75 | 62 | 19 | 1  | Carbamidomethylation                | 42793 | PREDICTED: S-adenosylmethionine synthase 5 [Vitis vinifera]                                       |
| 39  | 34    | gi 225432155 | 237.75 | 66 | 21 | 1  | Carbamidomethylation                | 43114 | PREDICTED: S-adenosylmethionine synthase 2 [Vitis vinifera]                                       |
| 108 | 20    | gi 225440045 | 236.11 | 39 | 28 | 2  | Carbamidomethylation; Oxidation (M) | 89589 | PREDICTED: cell division cycle protein 48 homolog [Vitis vinifera]                                |
| 35  | 31    | gi 225439223 | 236.01 | 30 | 23 | 4  | Carbamidomethylation; Oxidation (M) | 84991 | PREDICTED: 5-methyltetrahydropteroyltriglutamate--homocysteine methyltransferase [Vitis vinifera] |
| 61  | 16508 | gi 224144808 | 234.11 | 51 | 18 | 1  | Carbamidomethylation; Oxidation (M) | 49595 | Tubulin alpha-1 chain family protein [Populus trichocarpa]                                        |
| 58  | 16455 | gi 566188155 | 232.1  | 28 | 20 | 2  | Carbamidomethylation                | 89855 | hypothetical protein POPTR_0009s15490g [Populus trichocarpa]                                      |
| 80  | 16510 | gi 566146992 | 231.87 | 28 | 17 | 2  | Carbamidomethylation; Oxidation (M) | 71904 | heat shock protein 70 cognate [Populus trichocarpa]                                               |
| 70  | 26    | gi 225456079 | 230.54 | 42 | 18 | 17 | Carbamidomethylation                | 59180 | PREDICTED: ATP synthase subunit beta mitochondrial-like [Vitis vinifera]                          |
| 75  | 44    | gi 359473642 | 228.52 | 28 | 20 | 5  | Carbamidomethylation                | 90465 | PREDICTED: heat shock protein 90-1 [Vitis vinifera]                                               |
| 63  | 58    | gi 225449120 | 228.42 | 41 | 22 | 1  | Carbamidomethylation                | 49376 | PREDICTED: elongation factor 1-alpha [Vitis vinifera]                                             |

|     |       |              |        |    |    |   |                      |       |                                                                                                          |
|-----|-------|--------------|--------|----|----|---|----------------------|-------|----------------------------------------------------------------------------------------------------------|
| 94  | 16496 | gi 224085900 | 228.3  | 24 | 23 | 6 |                      | 94047 | hypothetical protein POPTR_0005s26260g [Populus trichocarpa]                                             |
| 54  | 64    | gi 731416007 | 228.03 | 57 | 19 | 1 | Carbamidomethylation | 42931 | PREDICTED: S-adenosylmethionine synthase 4 [Vitis vinifera]                                              |
| 155 | 16503 | gi 224073124 | 227.18 | 39 | 21 | 3 | Carbamidomethylation | 64544 | chaperonin precursor family protein [Populus trichocarpa]                                                |
| 68  | 160   | gi 359491599 | 220.4  | 39 | 15 | 2 | Carbamidomethylation | 36735 | PREDICTED: glyceraldehyde-3-phosphate dehydrogenase cytosolic [Vitis vinifera]                           |
| 129 | 16476 | gi 566212215 | 219.39 | 43 | 18 | 2 | Carbamidomethylation | 53198 | adenosylhomocysteine family protein [Populus trichocarpa]                                                |
| 131 | 78    | gi 359478916 | 218.49 | 36 | 14 | 3 | Carbamidomethylation | 48674 | PREDICTED: ribulose biphosphate carboxylase/oxygenase activase chloroplastic isoform X2 [Vitis vinifera] |
| 109 | 16511 | gi 566196410 | 218.28 | 29 | 23 | 3 |                      | 73406 | BiP isoform A family protein [Populus trichocarpa]                                                       |
| 103 | 16444 | gi 224094244 | 218.19 | 27 | 22 | 2 | Carbamidomethylation | 93953 | elongation factor 2 family protein [Populus trichocarpa]                                                 |
| 72  | 16464 | gi 566199292 | 216.87 | 48 | 16 | 1 | Carbamidomethylation | 42361 | hypothetical protein POPTR_0013s03790g [Populus trichocarpa]                                             |
| 111 | 42    | gi 731393262 | 216.79 | 38 | 24 | 4 | Carbamidomethylation | 64608 | PREDICTED: ruBisCO large subunit-binding protein subunit beta chloroplastic [Vitis vinifera]             |



|     |       |              |        |    |    |    |                                     |        |                                                                               |
|-----|-------|--------------|--------|----|----|----|-------------------------------------|--------|-------------------------------------------------------------------------------|
| 119 | 16518 | gi 566204581 | 216.45 | 20 | 14 | 3  | Carbamidomethylation                | 82947  | hypothetical protein POPTR_0014s16280g [Populus trichocarpa]                  |
| 57  | 16553 | gi 224133862 | 215.48 | 44 | 18 | 1  | Carbamidomethylation                | 36770  | glyceraldehyde-3-phosphate dehydrogenase family protein [Populus trichocarpa] |
| 142 | 95    | gi 731379116 | 214.53 | 21 | 14 | 14 | Carbamidomethylation                | 100128 | PREDICTED: puromycin-sensitive aminopeptidase isoform X2 [Vitis vinifera]     |
| 93  | 16500 | gi 224136806 | 213.36 | 38 | 18 | 3  | Carbamidomethylation                | 47928  | hypothetical protein POPTR_0015s14380g [Populus trichocarpa]                  |
| 120 | 39    | gi 225462164 | 211.82 | 24 | 23 | 3  | Carbamidomethylation                | 93979  | PREDICTED: elongation factor 2 [Vitis vinifera]                               |
| 118 | 104   | gi 225456806 | 210.16 | 39 | 17 | 1  | Carbamidomethylation                | 53079  | PREDICTED: adenosylhomocysteinase-like [Vitis vinifera]                       |
| 77  | 252   | gi 526117553 | 209.91 | 33 | 10 | 1  | Carbamidomethylation                | 39322  | glutamine synthetase cytosolic isozyme 2 [Vitis vinifera]                     |
| 181 | 16490 | gi 566191652 | 209.77 | 19 | 26 | 1  | Carbamidomethylation; Oxidation (M) | 193360 | clathrin heavy chain family protein [Populus trichocarpa]                     |
| 101 | 100   | gi 225457939 | 209.43 | 22 | 21 | 4  | Carbamidomethylation                | 93220  | PREDICTED: endoplasmic homolog [Vitis vinifera]                               |
| 138 | 16468 | gi 542688129 | 208.94 | 51 | 19 | 18 |                                     | 53694  | ATP synthase CF1 beta subunit (chloroplast) [Camellia taliensis]              |
| 121 | 17009 | gi 224065861 | 208.84 | 52 | 11 | 4  | Carbamidomethylation                | 18243  | Peptidyl-prolyl cis-trans isomerase family protein [Populus trichocarpa]      |

|     |       |              |        |    |    |    |                      |       |                                                                                                          |
|-----|-------|--------------|--------|----|----|----|----------------------|-------|----------------------------------------------------------------------------------------------------------|
| 91  | 67    | gi 224365668 | 208.69 | 44 | 21 | 17 | Carbamidomethylation | 55143 | ATPase subunit 1 (mitochondrion) [Vitis vinifera]                                                        |
| 123 | 16572 | gi 566204141 | 207.64 | 38 | 16 | 10 | Carbamidomethylation | 42935 | hypothetical protein POPTR_0014s13660g [Populus trichocarpa]                                             |
| 151 | 125   | gi 731401345 | 206.12 | 31 | 12 | 1  | Carbamidomethylation | 47976 | PREDICTED: ribulose biphosphate carboxylase/oxygenase activase chloroplastic isoform X2 [Vitis vinifera] |
| 140 | 41    | gi 225456004 | 204.81 | 27 | 19 | 4  | Carbamidomethylation | 75635 | PREDICTED: stromal 70 kDa heat shock-related protein chloroplastic [Vitis vinifera]                      |
| 92  | 110   | gi 359490179 | 204.68 | 22 | 15 | 4  | Carbamidomethylation | 78856 | PREDICTED: transketolase chloroplastic [Vitis vinifera]                                                  |
| 114 | 205   | gi 526117591 | 204.07 | 31 | 13 | 1  | Carbamidomethylation | 49581 | chalcone synthase [Vitis vinifera]                                                                       |
| 66  | 102   | gi 731393868 | 202.81 | 18 | 15 | 1  | Carbamidomethylation | 89385 | PREDICTED: 5-methyltetrahydropteroyltriglutamate--homocysteine methyltransferase 2 [Vitis vinifera]      |
| 125 | 16497 | gi 224088798 | 201.23 | 38 | 16 | 1  | Carbamidomethylation | 46974 | translation initiation factor eIF-4A family protein [Populus trichocarpa]                                |
| 165 | 16612 | gi 566182577 | 201.21 | 28 | 12 | 3  | Carbamidomethylation | 48316 | hypothetical protein POPTR_0008s05870g [Populus trichocarpa]                                             |

|     |       |              |        |    |    |   |                      |        |                                                                                                            |
|-----|-------|--------------|--------|----|----|---|----------------------|--------|------------------------------------------------------------------------------------------------------------|
| 130 | 87    | gi 731407424 | 199.82 | 19 | 16 | 1 | Carbamidomethylation | 91983  | PREDICTED: uncharacterized protein LOC100244028 [Vitis vinifera]                                           |
| 106 | 16526 | gi 224063766 | 199.22 | 19 | 13 | 2 | Carbamidomethylation | 80716  | transketolase family protein [Populus trichocarpa]                                                         |
| 116 | 159   | gi 225462777 | 199.09 | 40 | 15 | 3 | Carbamidomethylation | 42597  | PREDICTED: chalcone synthase 2 [Vitis vinifera]                                                            |
| 81  | 94    | gi 225464999 | 198.52 | 36 | 14 | 4 |                      | 42422  | PREDICTED: phosphoglycerate kinase cytosolic [Vitis vinifera]                                              |
| 162 | 116   | gi 731410136 | 197.92 | 16 | 13 | 2 | Carbamidomethylation | 95223  | PREDICTED: heat shock protein 83 isoform X3 [Vitis vinifera]                                               |
| 97  | 16607 | gi 224109060 | 197.75 | 35 | 16 | 1 | Carbamidomethylation | 50212  | PHOSPHOGLYCERATE KINASE 1 family protein [Populus trichocarpa]                                             |
| 115 | 138   | gi 731423140 | 196.72 | 31 | 16 | 1 | Carbamidomethylation | 55855  | PREDICTED: enolase [Vitis vinifera]                                                                        |
| 169 | 92    | gi 359479362 | 195.9  | 29 | 16 | 3 |                      | 61984  | PREDICTED: ruBisCO large subunit-binding protein subunit alpha [Vitis vinifera]                            |
| 166 | 166   | gi 225433510 | 195.13 | 29 | 12 | 4 | Carbamidomethylation | 51906  | PREDICTED: serine hydroxymethyltransferase 4 [Vitis vinifera]                                              |
| 214 | 61    | gi 731426977 | 194.79 | 27 | 20 | 4 | Carbamidomethylation | 102347 | PREDICTED: ATP-dependent Clp protease ATP-binding subunit clpA homolog CD4B chloroplastic [Vitis vinifera] |

|     |       |              |        |    |    |   |                      |       |                                                                            |
|-----|-------|--------------|--------|----|----|---|----------------------|-------|----------------------------------------------------------------------------|
| 99  | 16524 | gi 566176113 | 194.17 | 30 | 17 | 1 | Carbamidomethylation | 49308 | hypothetical protein POPTR_0006s13310g [Populus trichocarpa]               |
| 117 | 16660 | gi 566163210 | 192.88 | 32 | 13 | 1 | Carbamidomethylation | 42709 | naregenin-chalcone synthase family protein [Populus trichocarpa]           |
| 96  | 145   | gi 225464995 | 192.53 | 33 | 15 | 2 | Carbamidomethylation | 50083 | PREDICTED: phosphoglycerate kinase chloroplastic [Vitis vinifera]          |
| 288 | 136   | gi 225456274 | 192.07 | 30 | 14 | 4 | Carbamidomethylation | 55180 | PREDICTED: argininosuccinate synthase chloroplastic [Vitis vinifera]       |
| 176 | 16528 | gi 224104681 | 191.18 | 28 | 15 | 1 |                      | 61991 | RUBISCO SUBUNIT BINDING-protein ALPHA SUBUNIT [Populus trichocarpa]        |
| 191 | 72    | gi 225456880 | 191.01 | 30 | 13 | 3 | Carbamidomethylation | 52692 | PREDICTED: elongation factor TuB chloroplastic [Vitis vinifera]            |
| 381 | 16668 | gi 566187902 | 188.37 | 32 | 11 | 1 | Carbamidomethylation | 54181 | vacuolar ATP synthase subunit B family protein [Populus trichocarpa]       |
| 259 | 200   | gi 225427768 | 188.37 | 40 | 10 | 4 | Carbamidomethylation | 42948 | PREDICTED: fructose-bisphosphate aldolase 1 chloroplastic [Vitis vinifera] |
| 102 | 16541 | gi 566192207 | 187.79 | 30 | 17 | 1 | Carbamidomethylation | 49434 | hypothetical protein POPTR_0010s22560g [Populus trichocarpa]               |
| 200 | 146   | gi 731418890 | 187.33 | 30 | 12 | 1 | Carbamidomethylation | 52944 | PREDICTED: elongation factor Tu chloroplastic-like [Vitis vinifera]        |

|     |       |              |        |    |    |    |                      |        |                                                                                                              |
|-----|-------|--------------|--------|----|----|----|----------------------|--------|--------------------------------------------------------------------------------------------------------------|
| 195 | 85    | gi 225460328 | 186.65 | 22 | 16 | 1  | Carbamidomethylation | 74178  | PREDICTED: stromal 70 kDa heat shock-related protein chloroplastic-like [ <i>Vitis vinifera</i> ]            |
| 221 | 16575 | gi 224063263 | 186.65 | 30 | 15 | 1  | Carbamidomethylation | 58692  | 2-dehydro-3-deoxyphosphoheptonate aldolase family protein [ <i>Populus trichocarpa</i> ]                     |
| 271 | 128   | gi 225430776 | 186.33 | 28 | 13 | 13 | Carbamidomethylation | 73659  | PREDICTED: succinate dehydrogenase [ubiquinone] flavoprotein subunit mitochondrial [ <i>Vitis vinifera</i> ] |
| 105 | 16546 | gi 224098012 | 186.17 | 28 | 15 | 1  | Carbamidomethylation | 49521  | ADR12-2 family protein [ <i>Populus trichocarpa</i> ]                                                        |
| 394 | 345   | gi 731427869 | 184.98 | 30 | 11 | 1  | Carbamidomethylation | 54279  | PREDICTED: V-type proton ATPase subunit B 2 isoform X2 [ <i>Vitis vinifera</i> ]                             |
| 98  | 16520 | gi 224109716 | 184.86 | 29 | 17 | 1  | Carbamidomethylation | 49434  | hypothetical protein POPTR_0010s22620g [ <i>Populus trichocarpa</i> ]                                        |
| 154 | 66    | gi 225460961 | 184.62 | 17 | 15 | 2  | Carbamidomethylation | 110056 | PREDICTED: aconitate hydratase cytoplasmic [ <i>Vitis vinifera</i> ]                                         |
| 207 | 16657 | gi 566162272 | 184.01 | 27 | 11 | 1  | Carbamidomethylation | 52666  | hypothetical protein POPTR_0003s12160g [ <i>Populus trichocarpa</i> ]                                        |
| 266 | 16506 | gi 224065685 | 183.38 | 35 | 15 | 1  | Carbamidomethylation | 56639  | catalase family protein [ <i>Populus trichocarpa</i> ]                                                       |
| 218 | 16609 | gi 224053971 | 181.39 | 24 | 10 | 1  | Carbamidomethylation | 52743  | hypothetical protein POPTR_0001s08770g [ <i>Populus trichocarpa</i> ]                                        |

|     |       |              |        |    |    |    |                                     |       |                                                                                              |
|-----|-------|--------------|--------|----|----|----|-------------------------------------|-------|----------------------------------------------------------------------------------------------|
| 209 | 16775 | gi 566198898 | 180.99 | 15 | 12 | 1  |                                     | 73464 | heat shock protein 70 cognate [Populus trichocarpa]                                          |
| 193 | 130   | gi 731402352 | 180.65 | 21 | 15 | 1  | Carbamidomethylation                | 65010 | PREDICTED: ruBisCO large subunit-binding protein subunit beta chloroplastic [Vitis vinifera] |
| 210 | 16939 | gi 224109788 | 180.47 | 28 | 10 | 1  | Carbamidomethylation                | 37547 | putative adenosine kinase family protein [Populus trichocarpa]                               |
| 260 | 16525 | gi 224109966 | 179.32 | 28 | 14 | 13 | Carbamidomethylation; Oxidation (M) | 68701 | Vacuolar ATP synthase catalytic subunit A family protein [Populus trichocarpa]               |
| 95  | 143   | gi 731415862 | 178.15 | 34 | 16 | 6  | Carbamidomethylation                | 49362 | PREDICTED: calreticulin [Vitis vinifera]                                                     |
| 184 | 16693 | gi 566209405 | 177.54 | 26 | 12 | 1  |                                     | 44445 | hypothetical protein POPTR_0016s08780g [Populus trichocarpa]                                 |
| 227 | 71    | gi 225456550 | 177.18 | 45 | 13 | 2  | Carbamidomethylation                | 40797 | PREDICTED: UDP-arabinopyranose mutase 1 [Vitis vinifera]                                     |
| 203 | 16583 | gi 224079726 | 176.97 | 30 | 13 | 5  | Carbamidomethylation                | 46428 | isocitrate dehydrogenase family protein [Populus trichocarpa]                                |
| 343 | 101   | gi 225429228 | 176.27 | 17 | 11 | 1  |                                     | 72770 | PREDICTED: heat shock 70 kDa protein mitochondrial [Vitis vinifera]                          |
| 174 | 17040 | gi 566184599 | 173.38 | 24 | 10 | 3  |                                     | 37085 | glyceraldehyde 3-phosphate dehydrogenase family protein [Populus trichocarpa]                |

|     |       |              |        |    |    |    |                      |       |                                                                                        |
|-----|-------|--------------|--------|----|----|----|----------------------|-------|----------------------------------------------------------------------------------------|
| 163 | 203   | gi 526117485 | 173.31 | 29 | 7  | 1  |                      | 40813 | naringenin 2-oxoglutarate 3-dioxygenase [ <i>Vitis vinifera</i> ]                      |
| 147 | 16723 | gi 224141865 | 173.03 | 36 | 8  | 8  | Carbamidomethylation | 25015 | GTP-binding family protein [ <i>Populus trichocarpa</i> ]                              |
| 196 | 16586 | gi 671743392 | 172.41 | 30 | 13 | 10 |                      | 55440 | ATP synthase CF1 alpha subunit (chloroplast) [ <i>Camellia reticulata</i> ]            |
| 237 | 16787 | gi 224102193 | 172.17 | 33 | 10 | 2  | Carbamidomethylation | 35716 | cytosolic malate dehydrogenase family protein [ <i>Populus trichocarpa</i> ]           |
| 88  | 16659 | gi 224110772 | 170.75 | 27 | 11 | 1  | Carbamidomethylation | 37124 | glyceraldehyde 3-phosphate dehydrogenase family protein [ <i>Populus trichocarpa</i> ] |
| 133 | 494   | gi 225449541 | 170.29 | 24 | 7  | 2  | Carbamidomethylation | 27128 | PREDICTED: triosephosphate isomerase cytosolic [ <i>Vitis vinifera</i> ]               |
| 230 | 89    | gi 731402464 | 170.09 | 17 | 11 | 3  | Carbamidomethylation | 93319 | PREDICTED: heat shock 70 kDa protein 14-like [ <i>Vitis vinifera</i> ]                 |
| 231 | 295   | gi 359480275 | 170.02 | 30 | 8  | 1  |                      | 35505 | PREDICTED: malate dehydrogenase cytoplasmic [ <i>Vitis vinifera</i> ]                  |
| 168 | 16986 | gi 224079530 | 169.84 | 19 | 8  | 1  |                      | 39256 | glutamate-ammonia ligase family protein [ <i>Populus trichocarpa</i> ]                 |
| 283 | 16605 | gi 224141947 | 168.97 | 25 | 11 | 3  | Carbamidomethylation | 53416 | hypothetical protein POPTR_0018s02400g [ <i>Populus trichocarpa</i> ]                  |
| 296 | 308   | gi 731392297 | 167.64 | 29 | 12 | 2  |                      | 31832 | PREDICTED: histone H2B-like [ <i>Vitis vinifera</i> ]                                  |

|     |       |              |        |    |    |   |                                     |        |                                                                                                |
|-----|-------|--------------|--------|----|----|---|-------------------------------------|--------|------------------------------------------------------------------------------------------------|
| 255 | 16808 | gi 566149378 | 167.46 | 31 | 8  | 2 | Carbamidomethylation                | 34116  | hypothetical protein POPTR_0001s16430g [Populus trichocarpa]                                   |
| 261 | 16636 | gi 566181869 | 166.9  | 26 | 12 | 2 | Carbamidomethylation                | 54252  | hypothetical protein POPTR_0008s02110g [Populus trichocarpa]                                   |
| 233 | 248   | gi 225433375 | 166.88 | 24 | 11 | 1 | Carbamidomethylation                | 61370  | PREDICTED: chaperonin CPN60-2 mitochondrial [Vitis vinifera]                                   |
| 137 | 16871 | gi 566205887 | 166.64 | 29 | 10 | 1 | Carbamidomethylation; Oxidation (M) | 38451  | glutamine synthetase family protein [Populus trichocarpa]                                      |
| 223 | 237   | gi 225446579 | 165.85 | 14 | 9  | 1 | Carbamidomethylation                | 63486  | PREDICTED: ketol-acid reductoisomerase chloroplastic [Vitis vinifera]                          |
| 134 | 338   | gi 225427917 | 164.34 | 27 | 10 | 2 | Carbamidomethylation                | 34675  | PREDICTED: triosephosphate isomerase chloroplastic [Vitis vinifera]                            |
| 300 | 16811 | gi 566182073 | 164.34 | 55 | 11 | 1 |                                     | 15828  | hypothetical protein POPTR_0008s03050g [Populus trichocarpa]                                   |
| 408 | 16616 | gi 224105855 | 164.09 | 14 | 10 | 1 |                                     | 73261  | heat shock protein 70 [Populus trichocarpa]                                                    |
| 201 | 258   | gi 731404310 | 163.82 | 29 | 8  | 5 | Carbamidomethylation                | 33129  | PREDICTED: putative lactoylglutathione lyase [Vitis vinifera]                                  |
| 194 | 16571 | gi 566204389 | 163.5  | 14 | 14 | 1 | Carbamidomethylation                | 109035 | hypothetical protein POPTR_0014s15170g [Populus trichocarpa]                                   |
| 213 | 253   | gi 225451581 | 163.33 | 30 | 10 | 1 | Carbamidomethylation                | 38690  | PREDICTED: mitochondrial phosphate carrier protein 3 mitochondrial isoform X1 [Vitis vinifera] |



|     |       |              |        |    |    |   |                      |        |                                                                                                  |
|-----|-------|--------------|--------|----|----|---|----------------------|--------|--------------------------------------------------------------------------------------------------|
| 246 | 16674 | gi 542688125 | 162.91 | 18 | 6  | 6 |                      | 56099  | photosystem II p680 chlorophyll A apoprotein CP-47 (chloroplast) [ <i>Camellia taliensis</i> ]   |
| 320 | 269   | gi 359476642 | 162.86 | 23 | 7  | 1 | Carbamidomethylation | 42804  | PREDICTED: fructose-bisphosphate aldolase 1 chloroplastic-like [ <i>Vitis vinifera</i> ]         |
| 335 | 141   | gi 731419756 | 162.43 | 23 | 9  | 2 | Carbamidomethylation | 52962  | PREDICTED: UDP-glucose 6-dehydrogenase 1 [ <i>Vitis vinifera</i> ]                               |
| 185 | 16585 | gi 224099261 | 161.49 | 15 | 13 | 1 | Carbamidomethylation | 90156  | heat shock family protein [ <i>Populus trichocarpa</i> ]                                         |
| 175 | 16857 | gi 224122864 | 161.31 | 69 | 10 | 1 | Carbamidomethylation | 20653  | hypothetical protein POPTR_0013s00700g [ <i>Populus trichocarpa</i> ]                            |
| 444 | 206   | gi 731385022 | 161.18 | 16 | 12 | 4 | Carbamidomethylation | 114759 | PREDICTED: glycine dehydrogenase (decarboxylating) mitochondrial [ <i>Vitis vinifera</i> ]       |
| 197 | 139   | gi 225468576 | 160.84 | 16 | 13 | 3 | Carbamidomethylation | 98187  | PREDICTED: aconitate hydratase 1 [ <i>Vitis vinifera</i> ]                                       |
| 217 | 17140 | gi 224075758 | 160.79 | 61 | 8  | 3 | Carbamidomethylation | 15268  | hypothetical protein POPTR_0003s22120g [ <i>Populus trichocarpa</i> ]                            |
| 224 | 17082 | gi 224068456 | 160.63 | 21 | 8  | 3 | Carbamidomethylation | 39431  | thioredoxin family protein [ <i>Populus trichocarpa</i> ]                                        |
| 391 | 16552 | gi 224101561 | 160.34 | 18 | 10 | 2 | Carbamidomethylation | 65798  | subunit B of the trimeric enzyme ATP Citrate lyase family protein [ <i>Populus trichocarpa</i> ] |

|     |       |              |        |    |    |   |                      |        |                                                                          |
|-----|-------|--------------|--------|----|----|---|----------------------|--------|--------------------------------------------------------------------------|
| 143 | 198   | gi 731406211 | 160.16 | 11 | 10 | 3 | Carbamidomethylation | 92443  | PREDICTED: sucrose synthase [Vitis vinifera]                             |
| 310 | 257   | gi 225466253 | 160.06 | 21 | 9  | 1 | Carbamidomethylation | 46284  | PREDICTED: isocitrate dehydrogenase [NADP] [Vitis vinifera]              |
| 242 | 16574 | gi 224058852 | 159.08 | 15 | 11 | 2 | Carbamidomethylation | 94161  | heat shock protein 70 [Populus trichocarpa]                              |
| 500 | 500   | gi 225440011 | 159.07 | 14 | 6  | 1 |                      | 77480  | PREDICTED: phenylalanine ammonia-lyase [Vitis vinifera]                  |
| 333 | 16791 | gi 566173570 | 158.89 | 19 | 8  | 2 | Carbamidomethylation | 44912  | hypothetical protein POPTR_0005s27550g [Populus trichocarpa]             |
| 267 | 17042 | gi 566164883 | 158.58 | 24 | 10 | 3 | Carbamidomethylation | 43246  | ketol-acid reductoisomerase family protein partial [Populus trichocarpa] |
| 326 | 17023 | gi 566202051 | 158.02 | 14 | 7  | 1 | Carbamidomethylation | 71118  | hypothetical protein POPTR_0014s02550g [Populus trichocarpa]             |
| 486 | 583   | gi 225435357 | 157.51 | 11 | 6  | 1 |                      | 77966  | PREDICTED: phenylalanine ammonia-lyase [Vitis vinifera]                  |
| 205 | 74    | gi 731393844 | 157.41 | 14 | 15 | 3 | Carbamidomethylation | 101855 | PREDICTED: protein argonaute 4 [Vitis vinifera]                          |
| 150 | 217   | gi 225437428 | 157.19 | 10 | 9  | 2 | Carbamidomethylation | 92483  | PREDICTED: sucrose synthase 2 [Vitis vinifera]                           |
| 145 | 16968 | gi 566210965 | 156.95 | 24 | 10 | 1 |                      | 39217  | glutamate-ammonia ligase family protein [Populus trichocarpa]            |
| 370 | 16748 | gi 224060514 | 155.2  | 17 | 9  | 5 | Carbamidomethylation | 70476  | polyadenylate-binding family protein [Populus trichocarpa]               |

|     |       |              |        |    |    |    |                      |       |                                                                           |
|-----|-------|--------------|--------|----|----|----|----------------------|-------|---------------------------------------------------------------------------|
| 250 | 16953 | gi 224105301 | 154.22 | 24 | 7  | 1  | Carbamidomethylation | 42832 | latex plastidic aldolase-like family protein [Populus trichocarpa]        |
| 173 | 17182 | gi 566152287 | 154.21 | 20 | 7  | 1  | Carbamidomethylation | 45060 | hypothetical protein POPTR_0001s32770g [Populus trichocarpa]              |
| 171 | 16797 | gi 224109062 | 153.09 | 26 | 10 | 1  |                      | 42679 | cytosolic phosphoglycerate kinase family protein [Populus trichocarpa]    |
| 346 | 194   | gi 225442018 | 152.75 | 26 | 7  | 1  | Carbamidomethylation | 33909 | PREDICTED: 40S ribosomal protein SA [Vitis vinifera]                      |
| 228 | 132   | gi 731428778 | 152.31 | 24 | 11 | 3  | Carbamidomethylation | 56891 | PREDICTED: serine hydroxymethyltransferase mitochondrial [Vitis vinifera] |
| 512 | 17246 | gi 566190515 | 152.15 | 25 | 6  | 5  | Carbamidomethylation | 42536 | hypothetical protein POPTR_0010s12790g [Populus trichocarpa]              |
| 513 | 286   | gi 731412519 | 152.14 | 11 | 5  | 1  |                      | 78831 | PREDICTED: phenylalanine ammonia-lyase G1 [Vitis vinifera]                |
| 285 | 228   | gi 225451995 | 151.87 | 35 | 9  | 2  |                      | 29540 | PREDICTED: 14-3-3-like protein A [Vitis vinifera]                         |
| 139 | 16937 | gi 224098421 | 151.87 | 30 | 8  | 2  | Carbamidomethylation | 27259 | Triosephosphate isomerase family protein [Populus trichocarpa]            |
| 357 | 84    | gi 225442993 | 151.84 | 28 | 11 | 10 | Carbamidomethylation | 48355 | PREDICTED: DEAD-box ATP-dependent RNA helicase 56 [Vitis vinifera]        |
| 177 | 16855 | gi 566203721 | 150.93 | 69 | 10 | 1  | Carbamidomethylation | 20680 | hypothetical protein POPTR_0014s11180g [Populus trichocarpa]              |

|     |       |              |        |    |    |   |                      |        |                                                                                |
|-----|-------|--------------|--------|----|----|---|----------------------|--------|--------------------------------------------------------------------------------|
| 734 | 17041 | gi 224095604 | 150.47 | 30 | 7  | 1 |                      | 31880  | PROHIBITIN 2 family protein [Populus trichocarpa]                              |
| 262 | 389   | gi 225441754 | 150.36 | 16 | 8  | 3 | Carbamidomethylation | 53382  | PREDICTED: adenylosuccinate synthetase 2 chloroplastic [Vitis vinifera]        |
| 420 | 742   | gi 526117784 | 150.21 | 28 | 6  | 2 | Carbamidomethylation | 30262  | 2-Cys peroxiredoxin [Vitis vinifera]                                           |
| 400 | 16544 | gi 566173508 | 150.11 | 22 | 10 | 1 | Carbamidomethylation | 56756  | catalase family protein [Populus trichocarpa]                                  |
| 451 | 111   | gi 225432252 | 149.89 | 26 | 10 | 8 |                      | 47374  | PREDICTED: 26S protease regulatory subunit 6A homolog [Vitis vinifera]         |
| 287 | 316   | gi 359480881 | 149.06 | 11 | 7  | 7 | Carbamidomethylation | 94936  | PREDICTED: beta-galactosidase 10 [Vitis vinifera]                              |
| 292 | 374   | gi 225426162 | 148.95 | 36 | 6  | 3 | Carbamidomethylation | 20013  | PREDICTED: 40S ribosomal protein S10 [Vitis vinifera]                          |
| 239 | 304   | gi 225425053 | 148.88 | 18 | 8  | 1 | Carbamidomethylation | 53492  | PREDICTED: 6-phosphogluconate dehydrogenase decarboxylating 3 [Vitis vinifera] |
| 449 | 449   | gi 731420830 | 148.79 | 34 | 8  | 2 |                      | 31951  | PREDICTED: prohibitin-1 mitochondrial [Vitis vinifera]                         |
| 360 | 16781 | gi 566165396 | 148.69 | 17 | 7  | 4 | Carbamidomethylation | 51757  | hypothetical protein POPTR_0004s07280g [Populus trichocarpa]                   |
| 428 | 16716 | gi 566190996 | 148.46 | 16 | 9  | 1 | Carbamidomethylation | 66968  | hypothetical protein POPTR_0010s15590g [Populus trichocarpa]                   |
| 340 | 108   | gi 526117643 | 148.34 | 12 | 8  | 4 |                      | 101329 | heat shock protein 101 [Vitis vinifera]                                        |

|     |       |              |        |    |   |   |                      |       |                                                                                            |
|-----|-------|--------------|--------|----|---|---|----------------------|-------|--------------------------------------------------------------------------------------------|
| 321 | 728   | gi 359485890 | 148.26 | 7  | 6 | 2 | Carbamidomethylation | 83365 | PREDICTED: beta-xylosidase/alpha-L-arabinofuranosidase 2-like [Vitis vinifera]             |
| 159 | 16920 | gi 566167040 | 148.13 | 27 | 8 | 2 | Carbamidomethylation | 33502 | hypothetical protein POPTR_0004s17530g [Populus trichocarpa]                               |
| 190 | 315   | gi 225457971 | 147.88 | 23 | 6 | 1 | Carbamidomethylation | 40415 | PREDICTED: flavanone 3-dioxygenase [Vitis vinifera]                                        |
| 491 | 254   | gi 225430619 | 147.71 | 36 | 8 | 8 | Carbamidomethylation | 22781 | PREDICTED: 40S ribosomal protein S5 [Vitis vinifera]                                       |
| 311 | 16653 | gi 224072811 | 147.7  | 24 | 9 | 1 |                      | 41910 | hypothetical protein POPTR_0003s20360g [Populus trichocarpa]                               |
| 398 | 163   | gi 225456339 | 147.25 | 24 | 8 | 1 | Carbamidomethylation | 41981 | PREDICTED: UDP-arabinopyranose mutase 1 isoform X2 [Vitis vinifera]                        |
| 308 | 17076 | gi 224143955 | 146.97 | 50 | 6 | 1 | Carbamidomethylation | 17511 | eukaryotic translation initiation factor 5A isoform V family protein [Populus trichocarpa] |
| 158 | 16754 | gi 566176273 | 146.53 | 8  | 9 | 1 |                      | 92143 | sucrose synthase family protein [Populus trichocarpa]                                      |
| 358 | 16705 | gi 566210462 | 146.24 | 13 | 8 | 2 | Carbamidomethylation | 67453 | Methylenetetrahydrofolate reductase family protein [Populus trichocarpa]                   |
| 424 | 17030 | gi 566150460 | 146.16 | 72 | 7 | 7 | Carbamidomethylation | 16862 | calmodulin-like protein 6a [Populus trichocarpa]                                           |
| 334 | 17398 | gi 224138586 | 145.97 | 18 | 5 | 2 |                      | 27577 | ascorbate peroxidase family protein [Populus trichocarpa]                                  |

|     |       |              |        |    |    |    |                      |       |                                                                                                |
|-----|-------|--------------|--------|----|----|----|----------------------|-------|------------------------------------------------------------------------------------------------|
| 445 | 16639 | gi 224086120 | 145.7  | 19 | 9  | 1  | Carbamidomethylation | 67209 | pyrophosphate-dependent phosphofructokinase alpha subunit family protein [Populus trichocarpa] |
| 208 | 437   | gi 225465198 | 144.91 | 14 | 7  | 1  | Carbamidomethylation | 48147 | PREDICTED: elongation factor 1-gamma-like [Vitis vinifera]                                     |
| 361 | 17069 | gi 224077927 | 144.44 | 17 | 6  | 1  | Carbamidomethylation | 42796 | latex plastidic aldolase-like family protein [Populus trichocarpa]                             |
| 375 | 448   | gi 526117711 | 144.21 | 18 | 5  | 1  | Carbamidomethylation | 36875 | malate dehydrogenase [Vitis vinifera]                                                          |
| 432 | 563   | gi 731376167 | 143.36 | 28 | 5  | 2  | Carbamidomethylation | 29267 | PREDICTED: proteasome subunit beta type-5 [Vitis vinifera]                                     |
| 279 | 16633 | gi 566186668 | 142.81 | 23 | 9  | 2  |                      | 41811 | ADP family protein [Populus trichocarpa]                                                       |
| 481 | 17029 | gi 566210440 | 142.43 | 25 | 10 | 10 | Carbamidomethylation | 49767 | GDP dissociation inhibitor family protein [Populus trichocarpa]                                |
| 245 | 16663 | gi 566170698 | 141.5  | 13 | 11 | 1  | Carbamidomethylation | 98215 | aconitate hydratase family protein [Populus trichocarpa]                                       |
| 366 | 227   | gi 224365636 | 140.9  | 11 | 6  | 6  |                      | 69587 | PSII 32 kDa protein (mitochondrion) [Vitis vinifera]                                           |
| 315 | 16635 | gi 566178983 | 140.74 | 23 | 9  | 1  |                      | 41070 | hypothetical protein POPTR_0007s01010g [Populus trichocarpa]                                   |
| 430 | 16872 | gi 566170807 | 140.55 | 23 | 7  | 1  | Carbamidomethylation | 40534 | Chain A family protein [Populus trichocarpa]                                                   |
| 85  | 16867 | gi 566147823 | 140.09 | 9  | 7  | 3  | Oxidation (M)        | 83349 | hypothetical protein POPTR_0001s07870g [Populus trichocarpa]                                   |

|     |       |              |        |    |   |   |                                     |        |                                                                                              |
|-----|-------|--------------|--------|----|---|---|-------------------------------------|--------|----------------------------------------------------------------------------------------------|
| 474 | 17251 | gi 224080233 | 139.93 | 15 | 7 | 1 | Carbamidomethylation                | 53053  | UDP-glucose 6-dehydrogenase family protein [Populus trichocarpa]                             |
| 425 | 16958 | gi 224099363 | 139.51 | 8  | 7 | 5 |                                     | 101194 | alpha-xylosidase family protein [Populus trichocarpa]                                        |
| 497 | 211   | gi 225423507 | 138.93 | 16 | 7 | 1 | Carbamidomethylation                | 52744  | PREDICTED: UDP-glucose 6-dehydrogenase 3 [Vitis vinifera]                                    |
| 211 | 255   | gi 526117940 | 137.56 | 6  | 5 | 2 |                                     | 91805  | phospholipase D alpha [Vitis vinifera]                                                       |
| 407 | 17442 | gi 566152994 | 137.07 | 19 | 9 | 2 | Carbamidomethylation                | 57135  | hypothetical protein POPTR_0001s35790g [Populus trichocarpa]                                 |
| 254 | 1727  | gi 225465837 | 136.93 | 6  | 4 | 2 | Carbamidomethylation                | 46787  | PREDICTED: protein ASPARTIC PROTEASE IN GUARD CELL 2 [Vitis vinifera]                        |
| 616 | 17433 | gi 566214954 | 136.77 | 18 | 6 | 1 | Carbamidomethylation; Oxidation (M) | 39277  | hypothetical protein POPTR_0018s09170g [Populus trichocarpa]                                 |
| 519 | 525   | gi 225426063 | 135.94 | 16 | 6 | 1 | Carbamidomethylation                | 53896  | PREDICTED: 6-phosphogluconate dehydrogenase decarboxylating 1 chloroplastic [Vitis vinifera] |
| 324 | 692   | gi 731388721 | 135.77 | 25 | 6 | 3 |                                     | 18965  | PREDICTED: translationally-controlled tumor protein homolog [Vitis vinifera]                 |
| 240 | 17045 | gi 224084209 | 135.42 | 18 | 7 | 2 | Carbamidomethylation                | 35142  | O2 evolving complex 33kD family protein [Populus trichocarpa]                                |

|     |       |              |        |    |   |   |                                        |        |                                                                                         |
|-----|-------|--------------|--------|----|---|---|----------------------------------------|--------|-----------------------------------------------------------------------------------------|
| 275 | 17021 | gi 224083020 | 135.15 | 39 | 7 | 1 | Carbamidomethylation;<br>Oxidation (M) | 18138  | Peptidyl-prolyl cis-trans isomerase family protein [Populus trichocarpa]                |
| 578 | 337   | gi 225423961 | 135.08 | 9  | 6 | 4 | Carbamidomethylation                   | 103148 | PREDICTED: alpha-xylosidase 1 [Vitis vinifera]                                          |
| 332 | 122   | gi 731430736 | 135.04 | 19 | 7 | 3 | Carbamidomethylation                   | 44590  | PREDICTED: 60S ribosomal protein L3 [Vitis vinifera]                                    |
| 685 | 311   | gi 225430390 | 134.73 | 15 | 5 | 5 | Carbamidomethylation                   | 57260  | PREDICTED: threonine synthase chloroplastic [Vitis vinifera]                            |
| 415 | 585   | gi 225444377 | 134.27 | 16 | 4 | 1 | Carbamidomethylation                   | 38105  | PREDICTED: thiamine thiazole synthase 2 chloroplastic [Vitis vinifera]                  |
| 475 | 16889 | gi 566170533 | 134.15 | 15 | 7 | 7 |                                        | 47176  | hypothetical protein POPTR_0005s10290g [Populus trichocarpa]                            |
| 469 | 271   | gi 225439064 | 133.69 | 14 | 6 | 3 |                                        | 61092  | PREDICTED: 2 3-bisphosphoglycerate-independent phosphoglycerate mutase [Vitis vinifera] |
| 280 | 16922 | gi 224058615 | 133.57 | 21 | 5 | 2 | Carbamidomethylation                   | 33817  | hypothetical protein POPTR_0001s08570g [Populus trichocarpa]                            |
| 429 | 16898 | gi 224116086 | 133.39 | 16 | 4 | 1 | Carbamidomethylation                   | 37284  | hypothetical protein POPTR_0011s00500g [Populus trichocarpa]                            |
| 390 | 363   | gi 225464852 | 133.35 | 62 | 7 | 2 | Carbamidomethylation                   | 16577  | PREDICTED: ubiquitin-conjugating enzyme E2 variant 1D [Vitis vinifera]                  |
| 557 | 16970 | gi 568244554 | 133.28 | 18 | 4 | 4 |                                        | 39549  | photosystem II protein D2 (plastid) [Camellia oleifera]                                 |



|     |       |              |        |    |   |   |                                     |        |                                                                                                    |
|-----|-------|--------------|--------|----|---|---|-------------------------------------|--------|----------------------------------------------------------------------------------------------------|
| 411 | 627   | gi 225464720 | 132.88 | 14 | 5 | 2 | Carbamidomethylation                | 44946  | PREDICTED: oxygen-dependent coproporphyrinogen-III oxidase chloroplastic-like [Vitis vinifera]     |
| 630 | 16998 | gi 566156890 | 132.45 | 14 | 7 | 1 |                                     | 44077  | hypothetical protein POPTR_0002s08240g [Populus trichocarpa]                                       |
| 124 | 16804 | gi 224053300 | 132.3  | 56 | 9 | 9 | Carbamidomethylation                | 17702  | ubiquitin/ribosomal protein 27a [Populus trichocarpa]                                              |
| 534 | 327   | gi 731425536 | 131.6  | 14 | 6 | 1 | Carbamidomethylation; Oxidation (M) | 52880  | PREDICTED: UDP-glucose 6-dehydrogenase 1 isoform X2 [Vitis vinifera]                               |
| 467 | 16560 | gi 566206267 | 131.48 | 9  | 6 | 2 |                                     | 100324 | hypothetical protein POPTR_0015s06760g [Populus trichocarpa]                                       |
| 383 | 460   | gi 359483716 | 131.37 | 26 | 7 | 1 | Carbamidomethylation                | 29551  | PREDICTED: 14-3-3-like protein D isoform X2 [Vitis vinifera]                                       |
| 297 | 301   | gi 225452510 | 130.87 | 10 | 7 | 2 |                                     | 58057  | PREDICTED: aldehyde dehydrogenase family 2 member B7 mitochondrial [Vitis vinifera]                |
| 183 | 859   | gi 225429614 | 130.79 | 44 | 5 | 3 | Carbamidomethylation                | 17293  | PREDICTED: 17.3 kDa class II heat shock protein [Vitis vinifera]                                   |
| 416 | 187   | gi 225457674 | 130.56 | 16 | 9 | 2 | Carbamidomethylation                | 67344  | PREDICTED: pyrophosphate--fructose 6-phosphate 1-phosphotransferase subunit alpha [Vitis vinifera] |

|     |       |              |        |    |   |   |                                     |       |                                                                                 |
|-----|-------|--------------|--------|----|---|---|-------------------------------------|-------|---------------------------------------------------------------------------------|
| 797 | 697   | gi 731423169 | 130.53 | 32 | 5 | 5 | Carbamidomethylation                | 13646 | PREDICTED: 40S ribosomal protein S20-2 [Vitis vinifera]                         |
| 100 | 410   | gi 359475042 | 130.51 | 45 | 8 | 2 | Carbamidomethylation; Oxidation (M) | 18313 | PREDICTED: peptidyl-prolyl cis-trans isomerase [Vitis vinifera]                 |
| 414 | 17232 | gi 566169561 | 130.43 | 18 | 5 | 1 | Carbamidomethylation                | 34208 | hypothetical protein POPTR_0005s05040g [Populus trichocarpa]                    |
| 515 | 785   | gi 225459806 | 130.21 | 16 | 9 | 2 | Carbamidomethylation                | 57322 | PREDICTED: T-complex protein 1 subunit beta [Vitis vinifera]                    |
| 421 | 17072 | gi 224114557 | 130.1  | 17 | 4 | 1 | Carbamidomethylation                | 35588 | Malate dehydrogenase family protein [Populus trichocarpa]                       |
| 647 | 16870 | gi 224092216 | 130.04 | 11 | 5 | 5 | Carbamidomethylation                | 57364 | glycine hydroxymethyltransferase family protein [Populus trichocarpa]           |
| 241 | 16807 | gi 224101329 | 129.96 | 13 | 6 | 1 | Carbamidomethylation                | 45140 | glyceraldehyde 3-phosphate dehydrogenase 1 family protein [Populus trichocarpa] |
| 489 | 932   | gi 225450626 | 129.91 | 16 | 6 | 1 | Carbamidomethylation                | 39269 | PREDICTED: probable protein disulfide-isomerase A6 [Vitis vinifera]             |
| 499 | 201   | gi 225442156 | 129.71 | 31 | 7 | 1 | Carbamidomethylation                | 26179 | PREDICTED: 40S ribosomal protein S3-3 [Vitis vinifera]                          |
| 586 | 18654 | gi 224053535 | 129.45 | 16 | 4 | 1 |                                     | 38585 | pyruvate dehydrogenase family protein [Populus trichocarpa]                     |
| 462 | 818   | gi 731396254 | 129.24 | 15 | 6 | 5 | Carbamidomethylation                | 40707 | PREDICTED: alcohol dehydrogenase class-3 [Vitis vinifera]                       |

|      |       |              |        |    |   |   |                      |       |                                                                                     |
|------|-------|--------------|--------|----|---|---|----------------------|-------|-------------------------------------------------------------------------------------|
| 533  | 16729 | gi 566160536 | 129.22 | 9  | 5 | 1 |                      | 91733 | phospholipase D family protein [Populus trichocarpa]                                |
| 483  | 97    | gi 225441955 | 128.69 | 23 | 9 | 9 | Carbamidomethylation | 47682 | PREDICTED: 26S protease regulatory subunit 7 [Vitis vinifera]                       |
| 305  | 251   | gi 225461654 | 128.51 | 33 | 9 | 3 | Carbamidomethylation | 28864 | PREDICTED: 14-3-3-like protein D [Vitis vinifera]                                   |
| 493  | 16923 | gi 552540866 | 128.29 | 22 | 7 | 7 |                      | 35220 | cytochrome f (chloroplast) [Camellia danzaiensis]                                   |
| 573  | 17453 | gi 224088276 | 128.25 | 13 | 5 | 1 |                      | 50030 | leucine aminopeptidase family protein [Populus trichocarpa]                         |
| 265  | 16617 | gi 568244555 | 127.68 | 18 | 6 | 6 |                      | 51822 | photosystem II CP43 chlorophyll apoprotein (plastid) [Camellia oleifera]            |
| 715  | 223   | gi 225429530 | 127.48 | 14 | 6 | 2 | Carbamidomethylation | 54362 | PREDICTED: UDP-sulfoquinovose synthase chloroplastic [Vitis vinifera]               |
| 1027 | 706   | gi 225446693 | 127.39 | 10 | 5 | 1 |                      | 74318 | PREDICTED: ATP-dependent zinc metalloprotease FTSH 2 chloroplastic [Vitis vinifera] |
| 303  | 481   | gi 225442079 | 127.34 | 23 | 5 | 5 | Carbamidomethylation | 27325 | PREDICTED: proteasome subunit alpha type-6 [Vitis vinifera]                         |
| 378  | 238   | gi 359481634 | 127.05 | 52 | 6 | 1 | Carbamidomethylation | 16594 | PREDICTED: ubiquitin-conjugating enzyme E2 variant 1D [Vitis vinifera]              |
| 148  | 899   | gi 225431269 | 126.98 | 12 | 4 | 2 | Carbamidomethylation | 36580 | PREDICTED: peroxidase 72 [Vitis vinifera]                                           |

|     |       |              |        |    |   |   |                                     |       |                                                                                                           |
|-----|-------|--------------|--------|----|---|---|-------------------------------------|-------|-----------------------------------------------------------------------------------------------------------|
| 476 | 333   | gi 225447725 | 126.93 | 15 | 7 | 4 | Carbamidomethylation                | 61438 | PREDICTED: calnexin homolog [Vitis vinifera]                                                              |
| 423 | 282   | gi 731423943 | 126.91 | 31 | 5 | 2 | Carbamidomethylation                | 19961 | PREDICTED: 40S ribosomal protein S10 [Vitis vinifera]                                                     |
| 750 | 155   | gi 225446449 | 126.88 | 9  | 6 | 3 |                                     | 97503 | PREDICTED: 26S proteasome non-ATPase regulatory subunit 2 homolog A [Vitis vinifera]                      |
| 418 | 17046 | gi 224085984 | 126.87 | 11 | 6 | 1 | Carbamidomethylation                | 61382 | multi-copper oxidase type 1 family protein [Populus trichocarpa]                                          |
| 235 | 209   | gi 731408286 | 126.82 | 16 | 6 | 6 |                                     | 53389 | PREDICTED: xylose isomerase [Vitis vinifera]                                                              |
| 257 | 364   | gi 225451146 | 126.82 | 17 | 8 | 5 |                                     | 57701 | PREDICTED: bifunctional 3-dehydroquinase dehydratase/shikimate dehydrogenase chloroplast [Vitis vinifera] |
| 277 | 222   | gi 225430398 | 126.78 | 16 | 8 | 6 |                                     | 50823 | PREDICTED: aspartate aminotransferase chloroplast [Vitis vinifera]                                        |
| 438 | 218   | gi 731395250 | 126.71 | 13 | 5 | 1 | Carbamidomethylation                | 48931 | PREDICTED: elongation factor Tu mitochondrial [Vitis vinifera]                                            |
| 484 | 229   | gi 731427020 | 126.68 | 10 | 6 | 2 | Carbamidomethylation; Oxidation (M) | 76330 | PREDICTED: glycine-tRNA ligase 1 mitochondrial [Vitis vinifera]                                           |

|      |       |              |        |    |   |   |                      |       |                                                                       |
|------|-------|--------------|--------|----|---|---|----------------------|-------|-----------------------------------------------------------------------|
| 373  | 216   | gi 526117840 | 126.5  | 15 | 9 | 2 |                      | 58698 | 3-deoxy-D-arabino-heptulosonate-7-phosphate synthase [Vitis vinifera] |
| 598  | 314   | gi 225432110 | 126.49 | 17 | 9 | 9 | Carbamidomethylation | 52920 | PREDICTED: dihydrolipoyl dehydrogenase mitochondrial [Vitis vinifera] |
| 570  | 17258 | gi 224140177 | 126.41 | 10 | 7 | 2 | Carbamidomethylation | 53698 | adenylosuccinate synthetase family protein [Populus trichocarpa]      |
| 1025 | 18083 | gi 566159452 | 126.29 | 9  | 4 | 1 |                      | 75110 | hypothetical protein POPTR_0002s22560g [Populus trichocarpa]          |
| 477  | 335   | gi 225445867 | 126.21 | 14 | 6 | 2 |                      | 60743 | PREDICTED: leucine aminopeptidase 1 [Vitis vinifera]                  |
| 591  | 664   | gi 731403303 | 126.21 | 37 | 5 | 2 | Carbamidomethylation | 15026 | PREDICTED: 40S ribosomal protein S12 [Vitis vinifera]                 |
| 204  | 440   | gi 225461156 | 126.12 | 61 | 6 | 2 |                      | 13980 | PREDICTED: probable histone H2A.2 [Vitis vinifera]                    |
| 281  | 17277 | gi 566170863 | 126.01 | 50 | 5 | 5 |                      | 11409 | histone H4 family protein [Populus trichocarpa]                       |
| 215  | 16673 | gi 224130834 | 125.98 | 12 | 5 | 3 | Carbamidomethylation | 58002 | tRNA synthetase-related family protein [Populus trichocarpa]          |
| 468  | 417   | gi 225429850 | 125.84 | 21 | 4 | 3 |                      | 24915 | PREDICTED: proteasome subunit beta type-6 [Vitis vinifera]            |
| 347  | 584   | gi 225451279 | 125.6  | 20 | 6 | 2 |                      | 29903 | PREDICTED: 40S ribosomal protein S3a-2-like [Vitis vinifera]          |

|     |       |              |        |    |   |   |                                     |       |                                                                                                                        |
|-----|-------|--------------|--------|----|---|---|-------------------------------------|-------|------------------------------------------------------------------------------------------------------------------------|
| 330 | 17149 | gi 224081102 | 125.49 | 54 | 8 | 3 | Carbamidomethylation                | 15406 | hypothetical protein POPTR_0005s07340g [Populus trichocarpa]                                                           |
| 655 | 1175  | gi 359483879 | 125.31 | 15 | 5 | 1 | Carbamidomethylation                | 43617 | PREDICTED: LOW QUALITY PROTEIN: pyruvate dehydrogenase E1 component subunit beta-3 chloroplastic-like [Vitis vinifera] |
| 611 | 137   | gi 526117707 | 125.14 | 18 | 6 | 2 | Carbamidomethylation                | 53695 | uncharacterized protein LOC100261274 [Vitis vinifera]                                                                  |
| 412 | 140   | gi 359475304 | 125    | 8  | 7 | 7 | Carbamidomethylation                | 98624 | PREDICTED: coatomer subunit gamma-2 [Vitis vinifera]                                                                   |
| 236 | 313   | gi 225458424 | 124.99 | 17 | 6 | 1 | Carbamidomethylation                | 35120 | PREDICTED: oxygen-evolving enhancer protein 1 chloroplastic [Vitis vinifera]                                           |
| 226 | 170   | gi 225446944 | 124.95 | 21 | 8 | 1 | Carbamidomethylation                | 43340 | PREDICTED: protochlorophyllide reductase [Vitis vinifera]                                                              |
| 824 | 1012  | gi 225430650 | 124.93 | 16 | 5 | 1 | Carbamidomethylation; Oxidation (M) | 43927 | PREDICTED: pyruvate dehydrogenase E1 component subunit beta-3 chloroplastic [Vitis vinifera]                           |
| 523 | 16665 | gi 224087339 | 124.81 | 12 | 6 | 1 | Carbamidomethylation                | 57707 | biotin carboxylase precursor family protein [Populus trichocarpa]                                                      |
| 725 | 18948 | gi 566197644 | 124.29 | 21 | 5 | 4 |                                     | 26318 | hypothetical protein POPTR_0012s09540g [Populus trichocarpa]                                                           |

|     |       |              |        |    |   |   |                      |       |                                                                                     |
|-----|-------|--------------|--------|----|---|---|----------------------|-------|-------------------------------------------------------------------------------------|
| 389 | 17070 | gi 224064707 | 124.17 | 14 | 6 | 3 | Carbamidomethylation | 58836 | mitochondrial aldehyde dehydrogenase family protein [Populus trichocarpa]           |
| 238 | 165   | gi 359493870 | 124.14 | 17 | 8 | 1 | Carbamidomethylation | 42815 | PREDICTED: protochlorophyllide reductase chloroplastic [Vitis vinifera]             |
| 282 | 633   | gi 225444649 | 124.05 | 16 | 4 | 4 |                      | 26396 | PREDICTED: 20 kDa chaperonin chloroplastic [Vitis vinifera]                         |
| 918 | 17095 | gi 224100953 | 123.73 | 21 | 5 | 5 | Carbamidomethylation | 39107 | thymidine diphosphoglucose 4-6-dehydratase family protein [Populus trichocarpa]     |
| 529 | 17518 | gi 224054542 | 123.35 | 21 | 5 | 1 | Carbamidomethylation | 22400 | peptidyl-prolyl cis-trans isomerase family protein [Populus trichocarpa]            |
| 546 | 572   | gi 731382516 | 122.9  | 14 | 4 | 4 |                      | 37912 | PREDICTED: ankyrin repeat domain-containing protein 2 isoform X2 [Vitis vinifera]   |
| 691 | 17257 | gi 224108938 | 122.67 | 53 | 6 | 3 | Carbamidomethylation | 17381 | hypothetical protein POPTR_0010s17020g [Populus trichocarpa]                        |
| 363 | 413   | gi 225457075 | 122.45 | 11 | 5 | 1 | Carbamidomethylation | 58613 | PREDICTED: aldehyde dehydrogenase family 2 member B4 mitochondrial [Vitis vinifera] |

|     |       |              |        |    |   |   |                      |        |                                                                                                    |
|-----|-------|--------------|--------|----|---|---|----------------------|--------|----------------------------------------------------------------------------------------------------|
| 615 | 1238  | gi 225425166 | 122.29 | 16 | 4 | 1 |                      | 39489  | PREDICTED: pyruvate dehydrogenase E1 component subunit beta-1 mitochondrial [Vitis vinifera]       |
| 338 | 16703 | gi 224063273 | 122.11 | 30 | 8 | 1 |                      | 29380  | 14-3-3 protein 32kDa endonuclease [Populus trichocarpa]                                            |
| 631 | 17382 | gi 566183730 | 122.05 | 21 | 6 | 5 | Carbamidomethylation | 48131  | hypothetical protein POPTR_0008s13180g [Populus trichocarpa]                                       |
| 132 | 17575 | gi 566170929 | 121.86 | 12 | 4 | 1 | Carbamidomethylation | 36394  | hypothetical protein POPTR_0005s12070g [Populus trichocarpa]                                       |
| 525 | 750   | gi 225457502 | 120.93 | 12 | 3 | 3 | Carbamidomethylation | 35357  | PREDICTED: probable succinyl-CoA ligase [ADP-forming] subunit alpha mitochondrial [Vitis vinifera] |
| 485 | 473   | gi 225436253 | 120.86 | 11 | 6 | 1 | Carbamidomethylation | 66904  | PREDICTED: probable methylenetetrahydrofolate reductase [Vitis vinifera]                           |
| 907 | 699   | gi 225435309 | 120.82 | 8  | 6 | 6 | Carbamidomethylation | 82345  | PREDICTED: 4-hydroxy-3-methylbut-2-en-1-yl diphosphate synthase chloroplastic [Vitis vinifera]     |
| 470 | 312   | gi 225428247 | 120.4  | 12 | 6 | 1 | Carbamidomethylation | 60225  | PREDICTED: L-ascorbate oxidase homolog [Vitis vinifera]                                            |
| 349 | 81    | gi 225461660 | 120.14 | 7  | 7 | 1 |                      | 109823 | PREDICTED: phosphoenolpyruvate carboxylase housekeeping isozyme [Vitis vinifera]                   |



|     |       |              |        |    |   |   |                      |        |                                                                                            |
|-----|-------|--------------|--------|----|---|---|----------------------|--------|--------------------------------------------------------------------------------------------|
| 392 | 843   | gi 225439878 | 119.89 | 19 | 4 | 1 | Carbamidomethylation | 24585  | PREDICTED: soluble inorganic pyrophosphatase [ <i>Vitis vinifera</i> ]                     |
| 875 | 17351 | gi 224108774 | 119.87 | 14 | 5 | 1 | Carbamidomethylation | 54256  | Galactokinase family protein [ <i>Populus trichocarpa</i> ]                                |
| 626 | 156   | gi 225441236 | 119.81 | 4  | 5 | 5 | Carbamidomethylation | 177678 | PREDICTED: ferredoxin-dependent glutamate synthase chloroplastic [ <i>Vitis vinifera</i> ] |
| 556 | 16779 | gi 566175799 | 119.78 | 15 | 8 | 1 | Carbamidomethylation | 57465  | pyruvate kinase family protein [ <i>Populus trichocarpa</i> ]                              |
| 342 | 602   | gi 359476682 | 119.75 | 20 | 4 | 1 | Carbamidomethylation | 24349  | PREDICTED: soluble inorganic pyrophosphatase isoform X2 [ <i>Vitis vinifera</i> ]          |
| 399 | 685   | gi 225459808 | 119.64 | 9  | 6 | 1 |                      | 60137  | PREDICTED: L-ascorbate oxidase homolog [ <i>Vitis vinifera</i> ]                           |
| 478 | 1514  | gi 225450791 | 119.38 | 15 | 2 | 1 |                      | 22379  | PREDICTED: translationally-controlled tumor protein homolog [ <i>Vitis vinifera</i> ]      |
| 83  | 925   | gi 225465425 | 119.36 | 8  | 5 | 4 | Carbamidomethylation | 52683  | PREDICTED: uncharacterized protein LOC100241465 [ <i>Vitis vinifera</i> ]                  |
| 431 | 708   | gi 731392629 | 119.32 | 37 | 6 | 1 |                      | 17778  | PREDICTED: 60S ribosomal protein L12 [ <i>Vitis vinifera</i> ]                             |
| 376 | 17348 | gi 566184073 | 119.12 | 24 | 5 | 5 |                      | 22518  | photosystem I 20kD family protein [ <i>Populus trichocarpa</i> ]                           |

|     |       |              |        |    |   |   |                      |       |                                                                            |
|-----|-------|--------------|--------|----|---|---|----------------------|-------|----------------------------------------------------------------------------|
| 600 | 596   | gi 225466690 | 118.98 | 20 | 6 | 6 |                      | 42525 | PREDICTED: sedoheptulose-1 7-bisphosphatase chloroplastic [Vitis vinifera] |
| 815 | 276   | gi 225432012 | 118.81 | 13 | 5 | 1 | Carbamidomethylation | 54243 | PREDICTED: galactokinase [Vitis vinifera]                                  |
| 536 | 598   | gi 225454009 | 118.62 | 11 | 5 | 1 | Carbamidomethylation | 80666 | PREDICTED: transketolase chloroplastic [Vitis vinifera]                    |
| 628 | 519   | gi 225450981 | 118.46 | 11 | 6 | 5 | Carbamidomethylation | 51125 | PREDICTED: serine--tRNA ligase [Vitis vinifera]                            |
| 350 | 663   | gi 225449052 | 118.15 | 42 | 6 | 1 |                      | 17824 | PREDICTED: 60S ribosomal protein L12 [Vitis vinifera]                      |
| 222 | 18771 | gi 566242213 | 117.92 | 9  | 4 | 2 |                      | 29428 | hypothetical protein POPTR_0019s12380g [Populus trichocarpa]               |
| 440 | 17320 | gi 566189392 | 117.87 | 18 | 5 | 5 |                      | 27258 | hypothetical protein POPTR_0010s06320g [Populus trichocarpa]               |
| 564 | 293   | gi 225455784 | 117.58 | 18 | 7 | 5 | Carbamidomethylation | 50558 | PREDICTED: enolase 1 chloroplastic [Vitis vinifera]                        |
| 516 | 433   | gi 731438766 | 117.48 | 16 | 5 | 4 |                      | 46349 | PREDICTED: malate dehydrogenase glyoxysomal isoform X1 [Vitis vinifera]    |
| 464 | 16940 | gi 566206623 | 117.47 | 8  | 5 | 1 |                      | 54072 | aldehyde dehydrogenase 1 precursor family protein [Populus trichocarpa]    |
| 319 | 17266 | gi 224104631 | 117.3  | 23 | 6 | 1 |                      | 27319 | cytosolic ascorbate peroxidase family protein [Populus trichocarpa]        |

|     |       |              |        |    |   |   |                      |        |                                                                                                                  |
|-----|-------|--------------|--------|----|---|---|----------------------|--------|------------------------------------------------------------------------------------------------------------------|
| 314 | 703   | gi 731388929 | 117.15 | 14 | 7 | 3 |                      | 56541  | PREDICTED:<br>bifunctional 3-<br>dehydroquinase<br>dehydrogenase<br>chloroplastic isoform<br>X2 [Vitis vinifera] |
| 298 | 17234 | gi 566207041 | 116.94 | 12 | 4 | 2 | Carbamidomethylation | 53652  | glutamate 1-<br>semialdehyde<br>aminotransferase<br>family protein [Populus<br>trichocarpa]                      |
| 352 | 527   | gi 731368860 | 116.79 | 19 | 6 | 1 |                      | 39024  | PREDICTED:<br>glutamine synthetase<br>isoform X1 [Vitis<br>vinifera]                                             |
| 380 | 16896 | gi 224107259 | 116.55 | 17 | 7 | 1 |                      | 47894  | glutamine synthetase<br>family protein [Populus<br>trichocarpa]                                                  |
| 249 | 16784 | gi 566175737 | 116.53 | 16 | 7 | 7 | Carbamidomethylation | 47050  | Monodehydroascorbate<br>reductase family<br>protein [Populus<br>trichocarpa]                                     |
| 595 | 107   | gi 225452950 | 116.51 | 5  | 4 | 2 |                      | 109834 | PREDICTED:<br>chaperone protein<br>ClpB3 chloroplastic<br>[Vitis vinifera]                                       |
| 653 | 637   | gi 225431563 | 116.26 | 8  | 4 | 1 | Carbamidomethylation | 51250  | PREDICTED: UTP--<br>glucose-1-phosphate<br>uridylyltransferase<br>isoform X1 [Vitis<br>vinifera]                 |
| 561 | 17197 | gi 566153824 | 116.17 | 46 | 6 | 5 | Carbamidomethylation | 17248  | ubiquitin-conjugating<br>enzyme family protein<br>[Populus trichocarpa]                                          |
| 395 | 17211 | gi 224135485 | 116.08 | 10 | 5 | 1 | Carbamidomethylation | 58870  | glycosyl hydrolase<br>family 1 family protein<br>[Populus trichocarpa]                                           |

|     |       |              |        |    |   |   |                      |       |                                                                                    |
|-----|-------|--------------|--------|----|---|---|----------------------|-------|------------------------------------------------------------------------------------|
| 723 | 171   | gi 225441044 | 115.93 | 13 | 7 | 1 |                      | 57520 | PREDICTED: pyruvate kinase cytosolic isozyme-like [Vitis vinifera]                 |
| 504 | 18346 | gi 566184549 | 115.81 | 24 | 5 | 2 | Carbamidomethylation | 29191 | 20S proteasome beta subunit family protein [Populus trichocarpa]                   |
| 594 | 1529  | gi 225432466 | 115.75 | 22 | 3 | 3 | Carbamidomethylation | 18476 | PREDICTED: peptide methionine sulfoxide reductase B5-like [Vitis vinifera]         |
| 526 | 710   | gi 731382436 | 115.2  | 20 | 5 | 2 |                      | 35672 | PREDICTED: LOW QUALITY PROTEIN: isoflavone reductase-like protein [Vitis vinifera] |
| 359 | 659   | gi 225435177 | 115.06 | 20 | 6 | 1 | Carbamidomethylation | 27557 | PREDICTED: L-ascorbate peroxidase 2 cytosolic [Vitis vinifera]                     |
| 853 | 1208  | gi 225424530 | 115.03 | 22 | 5 | 5 |                      | 36021 | PREDICTED: eukaryotic translation initiation factor 3 subunit I [Vitis vinifera]   |
| 633 | 606   | gi 731438689 | 114.88 | 13 | 5 | 3 |                      | 44313 | PREDICTED: FAM10 family protein At4g22670 [Vitis vinifera]                         |
| 461 | 17494 | gi 224134414 | 114.86 | 13 | 3 | 2 |                      | 25625 | Proteasome subunit alpha type 2 family protein [Populus trichocarpa]               |
| 290 | 969   | gi 225426753 | 114.84 | 9  | 6 | 2 | Oxidation (M)        | 81719 | PREDICTED: primary amine oxidase [Vitis vinifera]                                  |
| 674 | 18232 | gi 566187006 | 114.83 | 10 | 4 | 2 |                      | 50172 | hypothetical protein POPTR_0009s08570g [Populus trichocarpa]                       |

|     |       |              |        |    |   |   |                      |        |                                                                                                                                                                                     |
|-----|-------|--------------|--------|----|---|---|----------------------|--------|-------------------------------------------------------------------------------------------------------------------------------------------------------------------------------------|
| 268 | 902   | gi 225461808 | 114.78 | 13 | 7 | 1 |                      | 75747  | PREDICTED:<br>trifunctional UDP-<br>glucose 4 6-<br>dehydratase/UDP-4-<br>keto-6-deoxy-D-<br>glucose 3 5-<br>epimerase/UDP-4-keto-<br>L-rhamnose-reductase<br>RHM1 [Vitis vinifera] |
| 974 | 520   | gi 225431090 | 114.49 | 36 | 7 | 7 | Carbamidomethylation | 27195  | PREDICTED:<br>proteasome subunit<br>alpha type-7 [Vitis<br>vinifera]                                                                                                                |
| 402 | 541   | gi 225436900 | 114.31 | 17 | 7 | 1 |                      | 47680  | PREDICTED:<br>glutamine synthetase<br>leaf isozyme<br>chloroplastic [Vitis<br>vinifera]                                                                                             |
| 369 | 1025  | gi 225456104 | 114.09 | 9  | 5 | 1 | Carbamidomethylation | 58411  | PREDICTED: beta-<br>glucosidase 44 [Vitis<br>vinifera]                                                                                                                              |
| 520 | 17820 | gi 566175251 | 113.72 | 12 | 4 | 4 |                      | 34569  | hypothetical protein<br>POPTR_0006s08710g<br>[Populus trichocarpa]                                                                                                                  |
| 509 | 832   | gi 225461287 | 113.68 | 20 | 3 | 3 | Carbamidomethylation | 24076  | PREDICTED:<br>cytochrome b6-f<br>complex iron-sulfur<br>subunit 1 chloroplastic<br>[Vitis vinifera]                                                                                 |
| 458 | 123   | gi 731391766 | 113.67 | 5  | 6 | 1 | Carbamidomethylation | 127035 | PREDICTED:<br>ubiquitin-activating<br>enzyme E1 1 [Vitis<br>vinifera]                                                                                                               |
| 528 | 16943 | gi 566153872 | 113.61 | 13 | 5 | 4 |                      | 40536  | glycolate oxidase<br>family protein [Populus<br>trichocarpa]                                                                                                                        |

|     |       |              |        |    |   |   |                      |        |                                                                                           |
|-----|-------|--------------|--------|----|---|---|----------------------|--------|-------------------------------------------------------------------------------------------|
| 688 | 17457 | gi 224129210 | 113.46 | 16 | 7 | 7 | Carbamidomethylation | 41121  | truncated acetyl Co-A acetyltransferase-like family protein [Populus trichocarpa]         |
| 712 | 231   | gi 225450275 | 113.22 | 18 | 6 | 3 | Carbamidomethylation | 35771  | PREDICTED: serine/threonine-protein phosphatase PP2A-2 catalytic subunit [Vitis vinifera] |
| 559 | 247   | gi 225452974 | 113.21 | 12 | 5 | 2 |                      | 58482  | PREDICTED: probable mitochondrial-processing peptidase subunit beta [Vitis vinifera]      |
| 863 | 17952 | gi 224064888 | 113.17 | 32 | 3 | 1 | Carbamidomethylation | 11576  | Ubiquitin-like family protein [Populus trichocarpa]                                       |
| 178 | 17181 | gi 566259890 | 112.99 | 11 | 8 | 3 |                      | 48155  | elongation factor 1-gamma 1 family protein [Populus trichocarpa]                          |
| 867 | 16706 | gi 224113365 | 112.39 | 5  | 5 | 5 |                      | 130750 | NtN2 family protein [Populus trichocarpa]                                                 |
| 842 | 16776 | gi 224095561 | 112.31 | 8  | 5 | 2 |                      | 97704  | hypothetical protein POPTR_0007s01200g [Populus trichocarpa]                              |
| 657 | 1650  | gi 225439520 | 111.9  | 11 | 6 | 3 |                      | 65247  | PREDICTED: pyruvate decarboxylase 2 [Vitis vinifera]                                      |
| 636 | 1073  | gi 225457407 | 111.31 | 12 | 5 | 5 |                      | 43604  | PREDICTED: malate dehydrogenase chloroplastic [Vitis vinifera]                            |

|     |       |              |        |    |   |   |                      |        |                                                                                                               |
|-----|-------|--------------|--------|----|---|---|----------------------|--------|---------------------------------------------------------------------------------------------------------------|
| 872 | 593   | gi 731412938 | 111.23 | 3  | 5 | 1 | Carbamidomethylation | 155024 | PREDICTED: probable phosphoribosylformylg lycinamidine synthase chloroplastic/mitochon drial [Vitis vinifera] |
| 269 | 17194 | gi 566181525 | 111.1  | 13 | 6 | 1 |                      | 42160  | hypothetical protein POPTR_0008s00350g [Populus trichocarpa]                                                  |
| 527 | 17541 | gi 566196811 | 111.01 | 8  | 4 | 1 | Carbamidomethylation | 62410  | hypothetical protein POPTR_0012s04670g [Populus trichocarpa]                                                  |
| 452 | 17771 | gi 566148911 | 110.48 | 8  | 3 | 2 |                      | 48782  | hypothetical protein POPTR_0001s14280g [Populus trichocarpa]                                                  |
| 758 | 16656 | gi 224124848 | 110.42 | 30 | 7 | 7 | Carbamidomethylation | 24893  | 60S ribosomal protein L10 [Populus trichocarpa]                                                               |
| 518 | 16921 | gi 224123784 | 110.18 | 12 | 6 | 5 | Carbamidomethylation | 58663  | hypothetical protein POPTR_0013s05500g [Populus trichocarpa]                                                  |
| 960 | 17342 | gi 224077760 | 109.96 | 26 | 4 | 1 |                      | 15880  | 40S ribosomal protein S19 [Populus trichocarpa]                                                               |
| 482 | 17536 | gi 566178862 | 109.76 | 9  | 4 | 3 |                      | 34943  | hypothetical protein POPTR_0007s00300g [Populus trichocarpa]                                                  |
| 877 | 1243  | gi 225438781 | 109.46 | 7  | 3 | 1 | Carbamidomethylation | 71362  | PREDICTED: polyadenylate-binding protein 2 [Vitis vinifera]                                                   |
| 675 | 1205  | gi 225443286 | 109.03 | 10 | 4 | 1 |                      | 43933  | PREDICTED: pyruvate dehydrogenase E1 component subunit alpha mitochondrial [Vitis vinifera]                   |
| 708 | 17574 | gi 566178300 | 108.97 | 8  | 3 | 2 | Carbamidomethylation | 45519  | hypothetical protein POPTR_0006s26630g [Populus trichocarpa]                                                  |

|      |       |              |        |    |   |   |                      |        |                                                                    |
|------|-------|--------------|--------|----|---|---|----------------------|--------|--------------------------------------------------------------------|
| 899  | 17949 | gi 224132216 | 108.85 | 31 | 3 | 1 | Carbamidomethylation | 11688  | hypothetical protein POPTR_0014s18990g [Populus trichocarpa]       |
| 558  | 17223 | gi 224139104 | 107.93 | 15 | 5 | 5 | Carbamidomethylation | 33044  | pyridoxin biosynthesis PDX1-like protein 3 [Populus trichocarpa]   |
| 410  | 369   | gi 359492927 | 107.83 | 19 | 5 | 1 |                      | 28650  | PREDICTED: 14-3-3-like protein GF14 kappa [Vitis vinifera]         |
| 780  | 721   | gi 225429209 | 107.82 | 7  | 4 | 3 |                      | 53142  | PREDICTED: serine carboxypeptidase-like 16 [Vitis vinifera]        |
| 538  | 17252 | gi 224075976 | 107.46 | 21 | 5 | 5 | Carbamidomethylation | 31893  | hypothetical protein POPTR_0003s21070g [Populus trichocarpa]       |
| 577  | 496   | gi 225449659 | 107.3  | 10 | 6 | 1 |                      | 57679  | PREDICTED: pyruvate kinase cytosolic isozyme-like [Vitis vinifera] |
| 703  | 549   | gi 225430366 | 107.17 | 4  | 4 | 1 |                      | 108100 | PREDICTED: chaperone protein ClpB4 mitochondrial [Vitis vinifera]  |
| 1099 | 17612 | gi 224104483 | 107.07 | 14 | 3 | 2 |                      | 23714  | hypothetical protein POPTR_0009s03300g [Populus trichocarpa]       |
| 592  | 17315 | gi 224079274 | 107.04 | 14 | 5 | 2 |                      | 41124  | ubiquitin family protein [Populus trichocarpa]                     |
| 677  | 17738 | gi 224066507 | 106.91 | 11 | 5 | 1 | Carbamidomethylation | 43683  | mRNA-binding family protein [Populus trichocarpa]                  |
| 806  | 17298 | gi 224063082 | 106.91 | 10 | 2 | 2 |                      | 28992  | Photosystem II 22 kDa family protein [Populus trichocarpa]         |
| 963  | 19656 | gi 566169467 | 106.57 | 17 | 2 | 1 |                      | 13987  | hypothetical protein POPTR_0005s04590g [Populus trichocarpa]       |



|     |       |              |        |    |   |   |                      |       |                                                                                               |
|-----|-------|--------------|--------|----|---|---|----------------------|-------|-----------------------------------------------------------------------------------------------|
| 293 | 807   | gi 225461209 | 106.5  | 25 | 4 | 2 |                      | 21740 | PREDICTED: NAD(P)H dehydrogenase (quinone) FQR1 [Vitis vinifera]                              |
| 465 | 2170  | gi 225425388 | 106.45 | 30 | 2 | 2 |                      | 13594 | PREDICTED: nuclear transport factor 2 [Vitis vinifera]                                        |
| 709 | 319   | gi 359478860 | 106.44 | 13 | 5 | 4 | Carbamidomethylation | 47055 | PREDICTED: 26S protease regulatory subunit 6B homolog [Vitis vinifera]                        |
| 724 | 979   | gi 731416996 | 106.42 | 9  | 4 | 4 |                      | 46827 | PREDICTED: poly(rC)-binding protein 3 [Vitis vinifera]                                        |
| 539 | 17104 | gi 671743459 | 106.41 | 46 | 4 | 4 | Carbamidomethylation | 9038  | photosystem I subunit VII (chloroplast) [Camellia reticulata]                                 |
| 521 | 17558 | gi 224127346 | 106.29 | 11 | 4 | 1 |                      | 36420 | arginase family protein [Populus trichocarpa]                                                 |
| 442 | 412   | gi 225443760 | 105.95 | 22 | 5 | 1 | Carbamidomethylation | 20875 | PREDICTED: 60S ribosomal protein L11-1-like [Vitis vinifera]                                  |
| 738 | 17062 | gi 224090212 | 105.87 | 14 | 4 | 2 | Carbamidomethylation | 29609 | 40S ribosomal protein S2 [Populus trichocarpa]                                                |
| 779 | 991   | gi 359494079 | 105.29 | 10 | 4 | 4 | Carbamidomethylation | 65102 | PREDICTED: LOW QUALITY PROTEIN: 65-kDa microtubule-associated protein 1-like [Vitis vinifera] |
| 419 | 17014 | gi 224140653 | 105.16 | 7  | 4 | 1 |                      | 61182 | phosphoglycerate mutase family protein [Populus trichocarpa]                                  |
| 571 | 547   | gi 225456295 | 105.03 | 20 | 5 | 3 |                      | 24961 | PREDICTED: elongation factor 1-delta [Vitis vinifera]                                         |

|      |       |              |        |    |   |   |                      |        |                                                                                                                                     |
|------|-------|--------------|--------|----|---|---|----------------------|--------|-------------------------------------------------------------------------------------------------------------------------------------|
| 849  | 17417 | gi 671743328 | 104.99 | 8  | 3 | 3 |                      | 56209  | acetyl-CoA carboxylase<br>carboxyltransferase<br>beta subunit<br>(chloroplast) [Camellia<br>pubicosta]                              |
| 328  | 466   | gi 225426743 | 104.94 | 16 | 4 | 1 | Carbamidomethylation | 33675  | PREDICTED:<br>bifunctional dTDP-4-<br>dehydrorhamnose 3 5-<br>epimerase/dTDP-4-<br>dehydrorhamnose<br>reductase [Vitis<br>vinifera] |
| 524  | 16818 | gi 224135747 | 104.9  | 30 | 7 | 1 | Carbamidomethylation | 26076  | 40S ribosomal protein<br>S3 [Populus<br>trichocarpa]                                                                                |
| 1071 | 19561 | gi 224102811 | 104.7  | 11 | 3 | 3 |                      | 40240  | hypothetical protein<br>POPTR_0009s16680g<br>[Populus trichocarpa]                                                                  |
| 866  | 17297 | gi 224141065 | 104.62 | 8  | 4 | 1 |                      | 58604  | mitochondrial<br>processing peptidase<br>beta subunit family<br>protein [Populus<br>trichocarpa]                                    |
| 789  | 239   | gi 225458111 | 104.57 | 6  | 6 | 1 |                      | 136997 | PREDICTED:<br>coatomer subunit<br>alpha-1 [Vitis vinifera]                                                                          |
| 624  | 612   | gi 225423953 | 104.4  | 17 | 5 | 2 |                      | 41947  | PREDICTED:<br>ubiquitin receptor<br>RAD23c isoform X2<br>[Vitis vinifera]                                                           |
| 666  | 18119 | gi 224063066 | 104.31 | 7  | 4 | 1 |                      | 56188  | disulfide-isomerase<br>family protein [Populus<br>trichocarpa]                                                                      |
| 717  | 17587 | gi 566184208 | 104.3  | 16 | 4 | 2 | Carbamidomethylation | 27210  | hypothetical protein<br>POPTR_0008s15820g<br>[Populus trichocarpa]                                                                  |

|     |       |              |        |    |   |   |                      |        |                                                                                   |
|-----|-------|--------------|--------|----|---|---|----------------------|--------|-----------------------------------------------------------------------------------|
| 706 | 438   | gi 225425318 | 104.29 | 5  | 5 | 5 | Carbamidomethylation | 108282 | PREDICTED: DNA replication licensing factor MCM2 [Vitis vinifera]                 |
| 434 | 372   | gi 225446664 | 104.1  | 26 | 6 | 1 | Carbamidomethylation | 20845  | PREDICTED: 60S ribosomal protein L11 [Vitis vinifera]                             |
| 567 | 731   | gi 225449971 | 104.03 | 4  | 4 | 3 |                      | 121958 | PREDICTED: protein transport protein SEC31 homolog B isoform X2 [Vitis vinifera]  |
| 368 | 18002 | gi 566185685 | 104.02 | 14 | 3 | 3 | Carbamidomethylation | 22408  | hypothetical protein POPTR_0009s01050g [Populus trichocarpa]                      |
| 894 | 19692 | gi 568244583 | 103.74 | 21 | 3 | 3 |                      | 21881  | clp protease proteolytic subunit (plastid) [Camellia oleifera]                    |
| 244 | 226   | gi 359497288 | 103.66 | 9  | 4 | 3 | Carbamidomethylation | 64041  | PREDICTED: peptidyl-prolyl cis-trans isomerase FKBP62 isoform X1 [Vitis vinifera] |
| 721 | 727   | gi 225464809 | 103.61 | 10 | 5 | 1 | Carbamidomethylation | 56995  | PREDICTED: gamma aminobutyrate transaminase 1 mitochondrial-like [Vitis vinifera] |
| 480 | 17440 | gi 566170829 | 103.53 | 16 | 4 | 1 |                      | 40626  | hypothetical protein POPTR_0005s11610g [Populus trichocarpa]                      |
| 730 | 16959 | gi 566202193 | 103.5  | 23 | 6 | 6 |                      | 29275  | hypothetical protein POPTR_0014s03240g [Populus trichocarpa]                      |
| 871 | 605   | gi 731399856 | 103.49 | 5  | 5 | 1 |                      | 104341 | PREDICTED: villin-2 [Vitis vinifera]                                              |
| 680 | 17789 | gi 566172819 | 103.34 | 11 | 5 | 1 | Carbamidomethylation | 47443  | hypothetical protein POPTR_0005s23110g [Populus trichocarpa]                      |

|     |       |              |        |    |   |   |                      |        |                                                                                         |
|-----|-------|--------------|--------|----|---|---|----------------------|--------|-----------------------------------------------------------------------------------------|
| 443 | 16836 | gi 566208295 | 103.08 | 7  | 8 | 1 | Carbamidomethylation | 102818 | hypothetical protein POPTR_0016s02480g [Populus trichocarpa]                            |
| 505 | 16874 | gi 224082478 | 103.08 | 9  | 4 | 1 | Carbamidomethylation | 44381  | ribosomal protein 1 [Populus trichocarpa]                                               |
| 501 | 642   | gi 225432758 | 102.72 | 15 | 5 | 1 | Carbamidomethylation | 29774  | PREDICTED: 40S ribosomal protein S3a-1 [Vitis vinifera]                                 |
| 761 | 29329 | gi 224141875 | 102.33 | 18 | 3 | 3 | Carbamidomethylation | 16908  | zinc finger family protein [Populus trichocarpa]                                        |
| 792 | 398   | gi 731405921 | 102.32 | 11 | 4 | 3 | Carbamidomethylation | 34871  | PREDICTED: phytochrome-associated serine/threonine-protein phosphatase [Vitis vinifera] |
| 441 | 17083 | gi 224091827 | 102.28 | 28 | 6 | 1 | Carbamidomethylation | 20659  | 60S ribosomal protein L11-2 [Populus trichocarpa]                                       |
| 612 | 17450 | gi 566176147 | 102.16 | 8  | 3 | 3 | Carbamidomethylation | 41553  | hypothetical protein POPTR_0006s13470g [Populus trichocarpa]                            |
| 635 | 17873 | gi 224058705 | 102.13 | 21 | 2 | 1 | Carbamidomethylation | 18641  | cytochrome c oxidase-related family protein [Populus trichocarpa]                       |
| 700 | 1029  | gi 359473645 | 102.12 | 6  | 5 | 2 | Carbamidomethylation | 66079  | PREDICTED: chaperonin 60 subunit beta 4 chloroplastic [Vitis vinifera]                  |
| 649 | 18344 | gi 224138966 | 101.99 | 9  | 3 | 3 |                      | 44974  | Chain D family protein [Populus trichocarpa]                                            |
| 632 | 192   | gi 225434712 | 101.88 | 29 | 7 | 3 |                      | 29576  | PREDICTED: proliferating cell nuclear antigen [Vitis vinifera]                          |
| 344 | 769   | gi 359488553 | 101.84 | 4  | 4 | 2 |                      | 115409 | PREDICTED: alpha-mannosidase isoform X2 [Vitis vinifera]                                |

|     |       |              |        |    |   |   |                      |        |                                                                                |
|-----|-------|--------------|--------|----|---|---|----------------------|--------|--------------------------------------------------------------------------------|
| 704 | 321   | gi 225457058 | 101.83 | 8  | 4 | 4 | Carbamidomethylation | 60477  | PREDICTED: T-complex protein 1 subunit gamma [Vitis vinifera]                  |
| 667 | 17053 | gi 566184833 | 101.72 | 12 | 5 | 1 | Carbamidomethylation | 53373  | alanine-2-oxoglutarate aminotransferase 1 family protein [Populus trichocarpa] |
| 517 | 545   | gi 526117441 | 101.59 | 5  | 5 | 2 |                      | 101670 | lipoxygenase [Vitis vinifera]                                                  |
| 795 | 17473 | gi 224086589 | 101.49 | 11 | 5 | 1 | Carbamidomethylation | 56517  | POLLEN-PISTIL INTERACTION 2 family protein [Populus trichocarpa]               |
| 845 | 1222  | gi 225457219 | 101.18 | 13 | 4 | 1 | Carbamidomethylation | 35220  | PREDICTED: ATP synthase subunit gamma mitochondrial [Vitis vinifera]           |
| 574 | 18711 | gi 224128708 | 100.64 | 12 | 3 | 1 |                      | 33828  | xyloglucan endo-1 family protein [Populus trichocarpa]                         |
| 646 | 16664 | gi 566190182 | 100.62 | 11 | 4 | 3 | Carbamidomethylation | 47998  | 26S proteasome subunit 8 family protein [Populus trichocarpa]                  |
| 547 | 17489 | gi 224071429 | 100.35 | 11 | 4 | 3 | Carbamidomethylation | 44978  | Phosphoribulokinase family protein [Populus trichocarpa]                       |
| 801 | 16895 | gi 566191895 | 100.19 | 3  | 6 | 1 |                      | 154710 | phosphoribosylformylglycinamide synthase family protein [Populus trichocarpa]  |
| 388 | 566   | gi 731407251 | 100.12 | 3  | 3 | 1 |                      | 92866  | PREDICTED: phospholipase D alpha 1-like [Vitis vinifera]                       |
| 463 | 746   | gi 225447041 | 100.11 | 8  | 4 | 2 | Carbamidomethylation | 60008  | PREDICTED: L-ascorbate oxidase homolog [Vitis vinifera]                        |

|      |       |              |       |    |   |   |                      |       |                                                                                    |
|------|-------|--------------|-------|----|---|---|----------------------|-------|------------------------------------------------------------------------------------|
| 364  | 811   | gi 225456404 | 99.93 | 9  | 3 | 1 | Carbamidomethylation | 50437 | PREDICTED: glutamate-1-semialdehyde 2 1-aminomutase chloroplastic [Vitis vinifera] |
| 805  | 2319  | gi 225452270 | 99.92 | 11 | 3 | 2 |                      | 34598 | PREDICTED: 28 kDa ribonucleoprotein chloroplastic-like [Vitis vinifera]            |
| 457  | 18405 | gi 224095668 | 99.84 | 6  | 2 | 1 |                      | 35550 | hypothetical protein POPTR_0007s01850g [Populus trichocarpa]                       |
| 751  | 17519 | gi 224100211 | 99.52 | 10 | 4 | 1 |                      | 43420 | pyruvate dehydrogenase family protein [Populus trichocarpa]                        |
| 492  | 953   | gi 526118138 | 99.49 | 17 | 4 | 1 |                      | 33840 | uncharacterized protein LOC100264250 [Vitis vinifera]                              |
| 494  | 729   | gi 731421236 | 99.4  | 11 | 4 | 1 |                      | 37446 | PREDICTED: arginase 1 mitochondrial [Vitis vinifera]                               |
| 1045 | 17402 | gi 566197266 | 99.38 | 23 | 5 | 2 | Carbamidomethylation | 35019 | hypothetical protein POPTR_0012s07510g [Populus trichocarpa]                       |
| 692  | 325   | gi 225456051 | 99.26 | 9  | 4 | 1 | Carbamidomethylation | 57589 | PREDICTED: T-complex protein 1 subunit delta [Vitis vinifera]                      |
| 606  | 17569 | gi 566167161 | 99.17 | 9  | 3 | 1 | Carbamidomethylation | 40240 | hypothetical protein POPTR_0004s18030g [Populus trichocarpa]                       |
| 827  | 18399 | gi 566174518 | 98.64 | 12 | 3 | 2 | Carbamidomethylation | 40168 | hypothetical protein POPTR_0006s04880g [Populus trichocarpa]                       |
| 645  | 17717 | gi 224101117 | 98.19 | 10 | 3 | 3 |                      | 34367 | 60S acidic ribosomal protein P0-A [Populus trichocarpa]                            |

|     |       |              |       |    |   |   |                                     |       |                                                                                        |
|-----|-------|--------------|-------|----|---|---|-------------------------------------|-------|----------------------------------------------------------------------------------------|
| 935 | 18215 | gi 566147574 | 98.16 | 10 | 4 | 4 |                                     | 44838 | hypothetical protein POPTR_0001s06560g [Populus trichocarpa]                           |
| 923 | 1009  | gi 359480225 | 97.7  | 17 | 4 | 1 | Carbamidomethylation                | 27397 | PREDICTED: peptidyl-prolyl cis-trans isomerase [Vitis vinifera]                        |
| 762 | 601   | gi 731390491 | 97.56 | 4  | 3 | 2 |                                     | 84964 | PREDICTED: protein transport protein SEC23-like [Vitis vinifera]                       |
| 619 | 18135 | gi 566160281 | 97.5  | 12 | 3 | 1 |                                     | 25839 | beta-hydroxyacyl-ACP dehydratase family protein [Populus trichocarpa]                  |
| 84  | 736   | gi 225455934 | 97.42 | 19 | 4 | 2 | Carbamidomethylation; Oxidation (M) | 20429 | PREDICTED: ribulose biphosphate carboxylase small chain chloroplastic [Vitis vinifera] |
| 956 | 17512 | gi 566158761 | 97.19 | 15 | 4 | 1 | Carbamidomethylation                | 29101 | cyclophilin family protein [Populus trichocarpa]                                       |
| 382 | 1653  | gi 225429975 | 96.87 | 8  | 3 | 3 |                                     | 39098 | PREDICTED: bark storage protein A [Vitis vinifera]                                     |
| 920 | 16906 | gi 224118744 | 96.86 | 8  | 4 | 1 | Carbamidomethylation                | 57369 | chaperonin family protein [Populus trichocarpa]                                        |
| 627 | 2050  | gi 731393849 | 96.84 | 6  | 3 | 2 |                                     | 56128 | PREDICTED: UBPI-associated protein 2A [Vitis vinifera]                                 |
| 713 | 816   | gi 526118026 | 96.79 | 18 | 5 | 4 | Carbamidomethylation                | 55487 | 5-enolpyruvylshikimate-3-phosphate synthase [Vitis vinifera]                           |
| 541 | 1587  | gi 225453350 | 96.75 | 16 | 2 | 2 |                                     | 16310 | PREDICTED: nucleoside diphosphate kinase B [Vitis vinifera]                            |

|      |       |              |       |    |   |   |                                     |        |                                                                                      |
|------|-------|--------------|-------|----|---|---|-------------------------------------|--------|--------------------------------------------------------------------------------------|
| 854  | 18325 | gi 566204282 | 96.73 | 12 | 4 | 3 | Carbamidomethylation                | 37909  | aldo/keto reductase family protein [Populus trichocarpa]                             |
| 778  | 592   | gi 225437537 | 96.71 | 26 | 4 | 4 |                                     | 22019  | PREDICTED: GTP-binding protein SAR1A [Vitis vinifera]                                |
| 580  | 17243 | gi 224100839 | 96.71 | 21 | 4 | 2 |                                     | 19919  | ATP synthase D chain-related family protein [Populus trichocarpa]                    |
| 883  | 17917 | gi 566206287 | 96.62 | 17 | 5 | 2 |                                     | 35464  | ATP synthase gamma chain family protein [Populus trichocarpa]                        |
| 270  | 17618 | gi 224102515 | 96.61 | 10 | 4 | 2 |                                     | 29608  | porin family protein [Populus trichocarpa]                                           |
| 1001 | 422   | gi 731439184 | 96.56 | 7  | 4 | 4 |                                     | 109426 | PREDICTED: 26S proteasome non-ATPase regulatory subunit 1 homolog A [Vitis vinifera] |
| 341  | 17164 | gi 566147610 | 96.33 | 24 | 5 | 2 |                                     | 20417  | hypothetical protein POPTR_0001s06720g [Populus trichocarpa]                         |
| 884  | 18553 | gi 224066545 | 96.01 | 25 | 4 | 1 | Carbamidomethylation                | 15325  | 40S ribosomal protein S12-1 [Populus trichocarpa]                                    |
| 610  | 987   | gi 731411833 | 95.93 | 14 | 3 | 2 | Carbamidomethylation                | 35859  | PREDICTED: nitrilase-like protein 2 [Vitis vinifera]                                 |
| 329  | 17044 | gi 566194782 | 95.46 | 7  | 5 | 1 | Carbamidomethylation                | 75679  | NAD-dependent epimerase/dehydratase family protein [Populus trichocarpa]             |
| 796  | 17548 | gi 224139168 | 95.38 | 9  | 4 | 1 | Carbamidomethylation; Oxidation (M) | 65070  | pyruvate decarboxylase family protein [Populus trichocarpa]                          |
| 1016 | 1521  | gi 225434319 | 95.27 | 42 | 5 | 4 | Carbamidomethylation                | 16482  | PREDICTED: ubiquitin-conjugating enzyme E2-17 kDa [Vitis vinifera]                   |



|     |       |              |       |    |   |   |                      |        |                                                                                     |
|-----|-------|--------------|-------|----|---|---|----------------------|--------|-------------------------------------------------------------------------------------|
| 488 | 17471 | gi 566210997 | 95.18 | 11 | 4 | 4 |                      | 47829  | hypothetical protein POPTR_0017s02900g [Populus trichocarpa]                        |
| 710 | 17490 | gi 224137858 | 94.98 | 15 | 4 | 4 |                      | 41555  | hypothetical protein POPTR_0016s04600g [Populus trichocarpa]                        |
| 979 | 852   | gi 225423722 | 94.94 | 13 | 2 | 1 |                      | 25584  | PREDICTED: proteasome subunit alpha type-2-B [Vitis vinifera]                       |
| 908 | 17238 | gi 566164179 | 94.68 | 6  | 4 | 4 | Carbamidomethylation | 61299  | hypothetical protein POPTR_0004s00550g [Populus trichocarpa]                        |
| 542 | 1264  | gi 225442963 | 94.44 | 8  | 3 | 2 |                      | 35176  | PREDICTED: methyl-CpG-binding domain-containing protein 11 [Vitis vinifera]         |
| 629 | 17782 | gi 224143559 | 94.43 | 9  | 3 | 1 |                      | 44475  | aspartate aminotransferase family protein [Populus trichocarpa]                     |
| 648 | 424   | gi 225428772 | 94.33 | 5  | 5 | 2 |                      | 121098 | PREDICTED: presequence protease 2 chloroplastic/mitochondrial-like [Vitis vinifera] |
| 551 | 887   | gi 359479647 | 94.19 | 28 | 6 | 6 | Carbamidomethylation | 22491  | PREDICTED: proteasome subunit beta type-2-A [Vitis vinifera]                        |
| 560 | 809   | gi 225445206 | 94.14 | 13 | 4 | 1 |                      | 45116  | PREDICTED: aspartate aminotransferase cytoplasmic [Vitis vinifera]                  |
| 543 | 17370 | gi 566192956 | 94.13 | 10 | 4 | 1 | Carbamidomethylation | 44225  | hypothetical protein POPTR_0011s00650g [Populus trichocarpa]                        |

|      |       |              |       |    |   |   |                      |       |                                                                                      |
|------|-------|--------------|-------|----|---|---|----------------------|-------|--------------------------------------------------------------------------------------|
| 773  | 17124 | gi 566259876 | 93.61 | 19 | 4 | 1 |                      | 23976 | hypothetical protein POPTR_0022s00350g [Populus trichocarpa]                         |
| 980  | 2321  | gi 731416683 | 93.59 | 20 | 2 | 1 | Carbamidomethylation | 15282 | PREDICTED: superoxide dismutase [Cu-Zn] isoform X2 [Vitis vinifera]                  |
| 327  | 467   | gi 225439749 | 93.37 | 46 | 4 | 3 |                      | 15764 | PREDICTED: histone H2A [Vitis vinifera]                                              |
| 1105 | 1389  | gi 225450549 | 93.1  | 7  | 4 | 1 | Carbamidomethylation | 59190 | PREDICTED: importin subunit alpha [Vitis vinifera]                                   |
| 426  | 444   | gi 225437777 | 93.09 | 6  | 3 | 1 | Carbamidomethylation | 58724 | PREDICTED: putative proline--tRNA ligase C19C7.06 [Vitis vinifera]                   |
| 448  | 836   | gi 225458231 | 92.85 | 16 | 4 | 4 |                      | 30646 | PREDICTED: proteasome subunit alpha type-1-B [Vitis vinifera]                        |
| 940  | 2325  | gi 225443274 | 92.78 | 12 | 3 | 3 |                      | 35506 | PREDICTED: cell wall integrity protein scw1 [Vitis vinifera]                         |
| 553  | 16841 | gi 669099987 | 92.61 | 7  | 6 | 5 |                      | 83116 | photosystem I P700 chlorophyll A apoprotein A1 (chloroplast) [Camellia crapnelliana] |
| 295  | 1539  | gi 225429604 | 92.6  | 21 | 3 | 1 |                      | 17412 | PREDICTED: 17.3 kDa class II heat shock protein [Vitis vinifera]                     |
| 892  | 17535 | gi 566180192 | 92.55 | 19 | 3 | 3 |                      | 27792 | hypothetical protein POPTR_0007s08020g [Populus trichocarpa]                         |
| 1151 | 951   | gi 731371455 | 92.45 | 8  | 4 | 3 |                      | 58282 | PREDICTED: coatomer subunit delta [Vitis vinifera]                                   |
| 775  | 17391 | gi 566182904 | 92.28 | 10 | 5 | 5 | Carbamidomethylation | 59760 | hypothetical protein POPTR_0008s07890g [Populus trichocarpa]                         |

|      |       |              |       |    |   |   |                                        |       |                                                                                                           |
|------|-------|--------------|-------|----|---|---|----------------------------------------|-------|-----------------------------------------------------------------------------------------------------------|
| 1035 | 3000  | gi 225453620 | 92.23 | 7  | 2 | 2 | Carbamidomethylation;<br>Oxidation (M) | 47761 | PREDICTED: pyruvate<br>dehydrogenase E1<br>component subunit<br>alpha-3 chloroplastic<br>[Vitis vinifera] |
| 584  | 17961 | gi 224107122 | 92.1  | 24 | 4 | 1 | Oxidation (M)                          | 19067 | translationally<br>controlled tumor-like<br>family protein [Populus<br>trichocarpa]                       |
| 785  | 391   | gi 225425280 | 92    | 10 | 4 | 1 |                                        | 48103 | PREDICTED:<br>uncharacterized protein<br>LOC100247241 [Vitis<br>vinifera]                                 |
| 1128 | 18313 | gi 224053607 | 91.86 | 11 | 3 | 1 |                                        | 34050 | EXGT1 family protein<br>[Populus trichocarpa]                                                             |
| 374  | 17196 | gi 224121218 | 91.82 | 9  | 3 | 1 | Carbamidomethylation                   | 36046 | GTP-binding protein<br>beta chain [Populus<br>trichocarpa]                                                |
| 548  | 18516 | gi 224104953 | 91.76 | 5  | 3 | 1 |                                        | 68350 | beta-D-glucan<br>exohydrolase family<br>protein [Populus<br>trichocarpa]                                  |
| 460  | 18187 | gi 566211618 | 91.65 | 10 | 3 | 2 |                                        | 35272 | pfkB-type carbohydrate<br>kinase family protein<br>[Populus trichocarpa]                                  |
| 699  | 639   | gi 731428049 | 91.5  | 9  | 3 | 2 | Carbamidomethylation                   | 47334 | PREDICTED: delta-<br>aminolevulinic acid<br>dehydratase<br>chloroplastic [Vitis<br>vinifera]              |
| 562  | 804   | gi 225460542 | 91.5  | 10 | 3 | 2 |                                        | 36331 | PREDICTED:<br>heterogeneous nuclear<br>ribonucleoprotein 1<br>[Vitis vinifera]                            |

|      |       |              |       |    |   |   |                      |        |                                                                                                                                       |
|------|-------|--------------|-------|----|---|---|----------------------|--------|---------------------------------------------------------------------------------------------------------------------------------------|
| 1217 | 18282 | gi 566192369 | 91.49 | 7  | 2 | 2 |                      | 57235  | Serine carboxypeptidase precursor family protein [Populus trichocarpa]                                                                |
| 870  | 581   | gi 731401982 | 91.28 | 5  | 3 | 3 | Carbamidomethylation | 60389  | PREDICTED: dihydrolipoyllysine-residue acetyltransferase component 2 of pyruvate dehydrogenase complex mitochondrial [Vitis vinifera] |
| 833  | 16576 | gi 224119200 | 91.27 | 5  | 6 | 1 |                      | 136903 | coatamer alpha subunit-like family protein [Populus trichocarpa]                                                                      |
| 507  | 941   | gi 225456914 | 91.11 | 25 | 4 | 2 | Carbamidomethylation | 16350  | PREDICTED: 60S ribosomal protein L27a-3 [Vitis vinifera]                                                                              |
| 993  | 16891 | gi 224109580 | 91.11 | 5  | 4 | 4 | Oxidation (M)        | 115877 | 2-oxoglutarate dehydrogenase E1 component family protein [Populus trichocarpa]                                                        |
| 1012 | 1064  | gi 225462285 | 91.06 | 9  | 4 | 4 |                      | 52600  | PREDICTED: inosine-5'-monophosphate dehydrogenase [Vitis vinifera]                                                                    |
| 687  | 1304  | gi 359475330 | 90.89 | 14 | 2 | 2 |                      | 16329  | PREDICTED: glycine-rich RNA-binding protein GRP2A [Vitis vinifera]                                                                    |
| 1029 | 1301  | gi 731426495 | 90.88 | 3  | 3 | 2 |                      | 120041 | PREDICTED: alpha-mannosidase [Vitis vinifera]                                                                                         |

|      |       |              |       |    |   |   |                      |        |                                                                       |
|------|-------|--------------|-------|----|---|---|----------------------|--------|-----------------------------------------------------------------------|
| 843  | 1325  | gi 731411781 | 90.74 | 14 | 3 | 3 |                      | 25284  | PREDICTED: manganese superoxide dismutase isoform X1 [Vitis vinifera] |
| 618  | 17721 | gi 566171771 | 90.53 | 9  | 4 | 2 |                      | 53299  | hypothetical protein POPTR_0005s16590g partial [Populus trichocarpa]  |
| 658  | 1011  | gi 225435878 | 90.5  | 28 | 3 | 2 |                      | 10567  | PREDICTED: 10 kDa chaperonin [Vitis vinifera]                         |
| 613  | 874   | gi 359478691 | 90.47 | 4  | 3 | 1 |                      | 92178  | PREDICTED: beta-galactosidase 8 [Vitis vinifera]                      |
| 1074 | 17671 | gi 566183513 | 90.44 | 6  | 3 | 2 |                      | 62808  | hypothetical protein POPTR_0008s11770g [Populus trichocarpa]          |
| 695  | 743   | gi 359482848 | 90.37 | 10 | 4 | 2 |                      | 43630  | PREDICTED: nucleosome assembly protein 1;4 [Vitis vinifera]           |
| 969  | 17098 | gi 566200621 | 90.22 | 14 | 3 | 3 |                      | 24286  | 60S ribosomal protein L15 [Populus trichocarpa]                       |
| 1059 | 709   | gi 359484512 | 90.12 | 5  | 2 | 2 |                      | 63994  | PREDICTED: asparagine--tRNA ligase cytoplasmic 1 [Vitis vinifera]     |
| 672  | 18559 | gi 566206007 | 89.4  | 3  | 5 | 3 | Carbamidomethylation | 104242 | hypothetical protein POPTR_0015s05540g [Populus trichocarpa]          |
| 1195 | 17004 | gi 224143678 | 89.19 | 4  | 4 | 2 |                      | 104783 | plasma membrane H+ ATPase family protein [Populus trichocarpa]        |
| 807  | 17003 | gi 224102919 | 89.18 | 5  | 3 | 2 |                      | 60331  | chaperonin family protein [Populus trichocarpa]                       |
| 252  | 17233 | gi 224065421 | 89.16 | 4  | 2 | 1 |                      | 64078  | hypothetical protein POPTR_0002s24970g [Populus trichocarpa]          |

|      |       |              |       |    |   |   |               |        |                                                                                                                                       |
|------|-------|--------------|-------|----|---|---|---------------|--------|---------------------------------------------------------------------------------------------------------------------------------------|
| 588  | 30216 | gi 566168757 | 88.98 | 7  | 2 | 1 |               | 42533  | hypothetical protein POPTR_0005s01370g [Populus trichocarpa]                                                                          |
| 781  | 2084  | gi 359474971 | 88.94 | 8  | 3 | 2 | Oxidation (M) | 59248  | PREDICTED: ubiquitin domain-containing protein DSK2b-like isoform X2 [Vitis vinifera]                                                 |
| 1041 | 204   | gi 731401620 | 88.89 | 6  | 5 | 1 |               | 104406 | PREDICTED: ATPase 10 plasma membrane-type [Vitis vinifera]                                                                            |
| 772  | 189   | gi 731428324 | 88.85 | 2  | 4 | 4 |               | 252296 | PREDICTED: acetyl-CoA carboxylase 1-like [Vitis vinifera]                                                                             |
| 957  | 19132 | gi 224073194 | 88.85 | 4  | 3 | 3 |               | 67506  | 10-formyltetrahydrofolate synthetase family protein [Populus trichocarpa]                                                             |
| 1030 | 1823  | gi 225423947 | 88.79 | 7  | 3 | 2 |               | 50179  | PREDICTED: dihydrolipoyllysine-residue acetyltransferase component 4 of pyruvate dehydrogenase complex chloroplastic [Vitis vinifera] |
| 921  | 262   | gi 225428386 | 88.75 | 9  | 3 | 2 |               | 44655  | PREDICTED: 26S protease regulatory subunit S10B homolog B [Vitis vinifera]                                                            |
| 767  | 18648 | gi 566147678 | 88.61 | 13 | 2 | 2 |               | 22319  | hypothetical protein POPTR_0001s07160g [Populus trichocarpa]                                                                          |
| 859  | 3226  | gi 526118000 | 88.54 | 13 | 3 | 1 |               | 22732  | germin-like protein 2 precursor [Vitis vinifera]                                                                                      |

|     |       |              |       |    |   |   |                      |        |                                                                                        |
|-----|-------|--------------|-------|----|---|---|----------------------|--------|----------------------------------------------------------------------------------------|
| 812 | 16798 | gi 566149322 | 88.44 | 4  | 4 | 1 |                      | 105097 | putative plasma membrane H <sup>+</sup> ATPase family protein [Populus trichocarpa]    |
| 753 | 17854 | gi 224062834 | 88.4  | 4  | 2 | 1 | Carbamidomethylation | 70900  | Polyadenylate-binding protein 5 [Populus trichocarpa]                                  |
| 735 | 367   | gi 225444472 | 88.4  | 8  | 3 | 3 | Carbamidomethylation | 44306  | PREDICTED: aminomethyltransferase mitochondrial [Vitis vinifera]                       |
| 609 | 629   | gi 359492254 | 88.34 | 11 | 7 | 2 |                      | 40876  | PREDICTED: ferredoxin--NADP reductase leaf-type isozyme chloroplastic [Vitis vinifera] |
| 933 | 17557 | gi 566168605 | 88.31 | 13 | 5 | 1 |                      | 44259  | hypothetical protein POPTR_0005s00670g [Populus trichocarpa]                           |
| 566 | 17616 | gi 566182000 | 88.25 | 9  | 5 | 1 | Carbamidomethylation | 57819  | hypothetical protein POPTR_0008s02740g [Populus trichocarpa]                           |
| 247 | 493   | gi 225436843 | 88.14 | 41 | 4 | 1 |                      | 14570  | PREDICTED: histone H2AX [Vitis vinifera]                                               |
| 742 | 357   | gi 731399677 | 88.08 | 5  | 5 | 1 | Carbamidomethylation | 102437 | PREDICTED: protein argonaute 4A-like [Vitis vinifera]                                  |
| 502 | 1421  | gi 731386809 | 87.97 | 8  | 2 | 1 |                      | 41704  | PREDICTED: naringenin 2-oxoglutarate 3-dioxygenase-like [Vitis vinifera]               |
| 786 | 16957 | gi 224075445 | 87.89 | 10 | 4 | 1 | Carbamidomethylation | 47494  | transaldolase family protein [Populus trichocarpa]                                     |
| 874 | 18542 | gi 224124892 | 87.84 | 13 | 3 | 1 |                      | 22641  | rhicadhesin receptor family protein [Populus trichocarpa]                              |

|      |       |              |       |    |   |   |                      |       |                                                                                      |
|------|-------|--------------|-------|----|---|---|----------------------|-------|--------------------------------------------------------------------------------------|
| 995  | 1430  | gi 359481838 | 87.75 | 10 | 5 | 1 | Carbamidomethylation | 54048 | PREDICTED: pyruvate kinase cytosolic isozyme [Vitis vinifera]                        |
| 587  | 17503 | gi 566165056 | 87.71 | 11 | 3 | 1 | Carbamidomethylation | 36365 | hypothetical protein POPTR_0004s05340g [Populus trichocarpa]                         |
| 955  | 17344 | gi 224125422 | 87.71 | 7  | 4 | 2 | Carbamidomethylation | 56543 | hypothetical protein POPTR_0013s03070g [Populus trichocarpa]                         |
| 1338 | 2166  | gi 359473071 | 87.04 | 4  | 2 | 2 | Carbamidomethylation | 65661 | PREDICTED: bifunctional purine biosynthesis protein purH isoform X2 [Vitis vinifera] |
| 550  | 667   | gi 225470804 | 86.78 | 6  | 2 | 1 |                      | 45224 | PREDICTED: phosphoribulokinase chloroplastic [Vitis vinifera]                        |
| 659  | 17430 | gi 224055647 | 86.75 | 9  | 3 | 3 |                      | 32125 | succinate dehydrogenase iron-sulfur protein subunit [Populus trichocarpa]            |
| 1249 | 17804 | gi 566168414 | 86.49 | 7  | 2 | 1 |                      | 34495 | quinone oxidoreductase-like family protein [Populus trichocarpa]                     |
| 752  | 506   | gi 731389917 | 86.32 | 6  | 3 | 3 | Carbamidomethylation | 54494 | PREDICTED: 3-isopropylmalate dehydratase large subunit isoform X2 [Vitis vinifera]   |
| 994  | 17639 | gi 566204313 | 86.28 | 5  | 3 | 3 | Carbamidomethylation | 64865 | hypothetical protein POPTR_0014s14690g [Populus trichocarpa]                         |
| 928  | 16830 | gi 566205907 | 86.15 | 12 | 4 | 4 | Carbamidomethylation | 29789 | 40S ribosomal protein S4 [Populus trichocarpa]                                       |



|      |       |              |       |    |   |   |                      |        |                                                                                                            |
|------|-------|--------------|-------|----|---|---|----------------------|--------|------------------------------------------------------------------------------------------------------------|
| 1163 | 1632  | gi 225447707 | 86.13 | 15 | 3 | 3 | Carbamidomethylation | 27098  | PREDICTED:<br>uncharacterized protein<br>LOC100263170 [ <i>Vitis<br/>vinifera</i> ]                        |
| 701  | 18416 | gi 224071567 | 85.85 | 4  | 2 | 1 |                      | 65821  | monocopper oxidase<br>precursor family<br>protein [ <i>Populus<br/>trichocarpa</i> ]                       |
| 1196 | 765   | gi 225443272 | 85.82 | 7  | 4 | 1 | Carbamidomethylation | 66288  | PREDICTED: D-3-<br>phosphoglycerate<br>dehydrogenase 3<br>chloroplastic-like [ <i>Vitis<br/>vinifera</i> ] |
| 1062 | 17168 | gi 224090159 | 85.74 | 3  | 3 | 1 |                      | 151232 | magnesium chelatase<br>subunit family protein<br>[ <i>Populus trichocarpa</i> ]                            |
| 707  | 336   | gi 225429870 | 85.7  | 8  | 5 | 5 | Carbamidomethylation | 60861  | PREDICTED:<br>aspartate--tRNA ligase<br>cytoplasmic [ <i>Vitis<br/>vinifera</i> ]                          |
| 623  | 540   | gi 225449262 | 85.5  | 24 | 5 | 1 |                      | 18173  | PREDICTED: 18.1<br>kDa class I heat shock<br>protein [ <i>Vitis vinifera</i> ]                             |
| 579  | 962   | gi 225447723 | 85.42 | 3  | 4 | 1 |                      | 109436 | PREDICTED:<br>staphylococcal<br>nuclease domain-<br>containing protein 1<br>[ <i>Vitis vinifera</i> ]      |
| 453  | 1386  | gi 225434203 | 85.32 | 8  | 3 | 1 | Carbamidomethylation | 38265  | PREDICTED: 2-<br>alkenal reductase<br>(NADP(+)-dependent)<br>[ <i>Vitis vinifera</i> ]                     |
| 689  | 1622  | gi 731406178 | 85.32 | 5  | 3 | 1 |                      | 62855  | PREDICTED:<br>pectinesterase-like<br>[ <i>Vitis vinifera</i> ]                                             |
| 811  | 17567 | gi 224071575 | 85.26 | 6  | 4 | 2 |                      | 65504  | stress inducible family<br>protein [ <i>Populus<br/>trichocarpa</i> ]                                      |

|      |       |              |       |    |   |   |                                        |        |                                                                        |
|------|-------|--------------|-------|----|---|---|----------------------------------------|--------|------------------------------------------------------------------------|
| 682  | 19424 | gi 566211207 | 85.15 | 8  | 3 | 1 | Carbamidomethylation;<br>Oxidation (M) | 38545  | hypothetical protein<br>POPTR_0017s03780g<br>[Populus trichocarpa]     |
| 1004 | 1290  | gi 225453909 | 85.1  | 13 | 2 | 2 | Carbamidomethylation                   | 24628  | PREDICTED:<br>proteasome subunit<br>beta type-1 [Vitis<br>vinifera]    |
| 639  | 1352  | gi 225428908 | 85.06 | 6  | 3 | 3 |                                        | 53765  | PREDICTED:<br>limonoid UDP-<br>glucosyltransferase<br>[Vitis vinifera] |
| 808  | 17608 | gi 224131618 | 84.85 | 16 | 3 | 3 |                                        | 26206  | dienelactone hydrolase<br>family protein [Populus<br>trichocarpa]      |
| 1145 | 654   | gi 731415751 | 84.76 | 13 | 2 | 2 | Carbamidomethylation                   | 20904  | PREDICTED: 60S<br>ribosomal protein L18-<br>2-like [Vitis vinifera]    |
| 953  | 1092  | gi 225456481 | 84.75 | 2  | 2 | 1 |                                        | 112435 | PREDICTED: alpha-<br>mannosidase [Vitis<br>vinifera]                   |
| 967  | 135   | gi 731402494 | 84.69 | 4  | 4 | 4 |                                        | 102377 | PREDICTED:<br>coatomer subunit beta'-<br>1 [Vitis vinifera]            |
| 506  | 495   | gi 731440833 | 84.64 | 17 | 3 | 3 |                                        | 24955  | PREDICTED: 40S<br>ribosomal protein S8<br>[Vitis vinifera]             |
| 880  | 17546 | gi 566200975 | 84.41 | 19 | 4 | 1 |                                        | 24022  | GTP-binding family<br>protein [Populus<br>trichocarpa]                 |
| 1039 | 1348  | gi 225462545 | 84.34 | 12 | 3 | 2 | Oxidation (M)                          | 27262  | PREDICTED:<br>proteasome subunit<br>alpha type-4 [Vitis<br>vinifera]   |
| 669  | 18129 | gi 566148278 | 84.28 | 8  | 3 | 2 | Carbamidomethylation                   | 38178  | UDP-glucose 4-<br>epimerase family<br>protein [Populus<br>trichocarpa] |
| 760  | 18078 | gi 224073923 | 84.13 | 20 | 4 | 3 |                                        | 23116  | hypothetical protein<br>POPTR_0003s05230g<br>[Populus trichocarpa]     |

|      |       |              |       |    |   |   |                                     |       |                                                                      |
|------|-------|--------------|-------|----|---|---|-------------------------------------|-------|----------------------------------------------------------------------|
| 302  | 851   | gi 225450388 | 84.11 | 4  | 3 | 2 | Carbamidomethylation                | 57174 | PREDICTED: beta-glucosidase 12 [Vitis vinifera]                      |
| 406  | 17746 | gi 566215609 | 84.1  | 3  | 2 | 1 |                                     | 91834 | hypothetical protein POPTR_0018s13110g [Populus trichocarpa]         |
| 822  | 18196 | gi 566245692 | 84.07 | 11 | 3 | 1 |                                     | 25488 | hypothetical protein POPTR_0019s15100g [Populus trichocarpa]         |
| 714  | 992   | gi 225441912 | 83.8  | 8  | 3 | 1 |                                     | 30951 | PREDICTED: S-formylglutathione hydrolase isoform X4 [Vitis vinifera] |
| 916  | 551   | gi 731440696 | 83.75 | 6  | 4 | 2 |                                     | 64402 | PREDICTED: hsp70-Hsp90 organizing protein 3-like [Vitis vinifera]    |
| 787  | 18942 | gi 566197584 | 83.42 | 5  | 2 | 1 |                                     | 42529 | hypothetical protein POPTR_0012s09200g [Populus trichocarpa]         |
| 582  | 18216 | gi 566259512 | 83.18 | 7  | 2 | 1 |                                     | 31098 | hypothetical protein POPTR_0030s00360g [Populus trichocarpa]         |
| 643  | 2344  | gi 225443154 | 83.18 | 18 | 3 | 3 | Carbamidomethylation; Oxidation (M) | 18245 | PREDICTED: lamin-like protein [Vitis vinifera]                       |
| 189  | 1530  | gi 731430493 | 83.16 | 4  | 2 | 1 | Carbamidomethylation                | 62956 | PREDICTED: laccase-14-like [Vitis vinifera]                          |
| 1152 | 776   | gi 731394453 | 83.11 | 9  | 3 | 1 |                                     | 46372 | PREDICTED: dnaJ protein homolog isoform X2 [Vitis vinifera]          |
| 565  | 17449 | gi 224078584 | 83.05 | 10 | 3 | 1 |                                     | 33150 | glyoxalase I homolog family protein [Populus trichocarpa]            |
| 540  | 17984 | gi 224078816 | 83.05 | 9  | 3 | 1 |                                     | 36460 | Leucoanthocyanidin reductase family protein [Populus trichocarpa]    |

|      |       |              |       |    |   |   |                      |        |                                                                                                                                       |
|------|-------|--------------|-------|----|---|---|----------------------|--------|---------------------------------------------------------------------------------------------------------------------------------------|
| 1259 | 17713 | gi 224100535 | 82.98 | 5  | 3 | 1 |                      | 67584  | hypothetical protein POPTR_0008s01000g [Populus trichocarpa]                                                                          |
| 1000 | 1629  | gi 359490763 | 82.91 | 9  | 3 | 3 | Carbamidomethylation | 39503  | PREDICTED: caffeic acid 3-O-methyltransferase [Vitis vinifera]                                                                        |
| 563  | 17374 | gi 566147333 | 82.77 | 4  | 4 | 1 |                      | 100058 | hypothetical protein POPTR_0001s05320g [Populus trichocarpa]                                                                          |
| 1193 | 1496  | gi 731392621 | 82.67 | 5  | 2 | 2 |                      | 64193  | PREDICTED: protein disulfide isomerase-like 1-4 isoform X2 [Vitis vinifera]                                                           |
| 583  | 16888 | gi 224131368 | 82.65 | 8  | 3 | 3 |                      | 48921  | hypothetical protein POPTR_0014s13720g [Populus trichocarpa]                                                                          |
| 855  | 1292  | gi 731378427 | 82.47 | 6  | 3 | 3 |                      | 51975  | PREDICTED: uncharacterized protein LOC100263310 [Vitis vinifera]                                                                      |
| 1069 | 1487  | gi 225460716 | 82.47 | 5  | 2 | 1 | Carbamidomethylation | 49588  | PREDICTED: dihydrolipoyllysine-residue acetyltransferase component 5 of pyruvate dehydrogenase complex chloroplastic [Vitis vinifera] |
| 798  | 19380 | gi 731407226 | 82.44 | 7  | 2 | 2 | Carbamidomethylation | 37934  | PREDICTED: 2-alkenal reductase (NADP(+)-dependent) [Vitis vinifera]                                                                   |
| 961  | 17127 | gi 566149354 | 82.32 | 13 | 3 | 3 |                      | 26031  | Proteasome subunit alpha type 5-1 family protein [Populus trichocarpa]                                                                |

|      |       |              |       |    |   |   |                      |        |                                                                         |
|------|-------|--------------|-------|----|---|---|----------------------|--------|-------------------------------------------------------------------------|
| 530  | 17242 | gi 566182348 | 82.19 | 5  | 3 | 3 | Carbamidomethylation | 70505  | peptidase M1 family protein [Populus trichocarpa]                       |
| 900  | 18013 | gi 566174458 | 82.19 | 16 | 3 | 1 | Carbamidomethylation | 23355  | hypothetical protein POPTR_0006s04560g [Populus trichocarpa]            |
| 1007 | 17769 | gi 566192876 | 82.09 | 10 | 3 | 2 | Carbamidomethylation | 47035  | hypothetical protein POPTR_0010s26170g [Populus trichocarpa]            |
| 696  | 17814 | gi 566177370 | 82.07 | 7  | 4 | 3 |                      | 60158  | DEAD box RNA helicase family protein [Populus trichocarpa]              |
| 793  | 1381  | gi 526117942 | 81.91 | 6  | 2 | 2 |                      | 37456  | beta 1-3 glucanase precursor [Vitis vinifera]                           |
| 983  | 2328  | gi 225435249 | 81.89 | 13 | 2 | 2 |                      | 27570  | PREDICTED: proteasome subunit beta type-4 [Vitis vinifera]              |
| 755  | 17545 | gi 566169569 | 81.84 | 3  | 3 | 3 | Carbamidomethylation | 117048 | transport Sec24 family protein [Populus trichocarpa]                    |
| 447  | 1281  | gi 359494275 | 81.58 | 10 | 3 | 1 |                      | 25431  | PREDICTED: probable glutathione S-transferase parC [Vitis vinifera]     |
| 387  | 719   | gi 225424242 | 81.56 | 40 | 4 | 1 |                      | 10611  | PREDICTED: 10 kDa chaperonin [Vitis vinifera]                           |
| 662  | 17008 | gi 566186274 | 81.42 | 14 | 5 | 1 |                      | 29153  | proliferating cell nuclear antigen family protein [Populus trichocarpa] |
| 968  | 28895 | gi 224111100 | 81.03 | 11 | 3 | 1 | Carbamidomethylation | 27203  | hypothetical protein POPTR_0010s09180g [Populus trichocarpa]            |
| 508  | 17844 | gi 566198902 | 80.95 | 26 | 2 | 1 |                      | 15349  | hypothetical protein POPTR_0013s01890g [Populus trichocarpa]            |

|      |       |              |       |    |   |   |                      |        |                                                                            |
|------|-------|--------------|-------|----|---|---|----------------------|--------|----------------------------------------------------------------------------|
| 1075 | 17628 | gi 566213642 | 80.91 | 4  | 2 | 1 |                      | 43635  | hypothetical protein POPTR_0018s01390g [Populus trichocarpa]               |
| 472  | 17352 | gi 566156897 | 80.64 | 6  | 3 | 2 |                      | 46943  | Delta-aminolevulinic acid dehydratase family protein [Populus trichocarpa] |
| 944  | 1323  | gi 526117539 | 80.59 | 10 | 2 | 1 | Carbamidomethylation | 34687  | class I extracellular chitinase precursor [Vitis vinifera]                 |
| 731  | 17730 | gi 566189053 | 80.43 | 6  | 3 | 2 |                      | 51981  | hypothetical protein POPTR_0010s04610g [Populus trichocarpa]               |
| 1140 | 17395 | gi 224074998 | 80.31 | 5  | 4 | 4 | Carbamidomethylation | 100185 | hypothetical protein POPTR_0003s13040g [Populus trichocarpa]               |
| 575  | 2506  | gi 225465704 | 80.18 | 11 | 2 | 2 |                      | 11389  | PREDICTED: 60S acidic ribosomal protein P2B [Vitis vinifera]               |
| 331  | 16640 | gi 671743230 | 80.09 | 6  | 4 | 4 | Carbamidomethylation | 82370  | photosystem I P700 apoprotein A2 (chloroplast) [Camellia petelotii]        |
| 810  | 18861 | gi 566159684 | 80.07 | 4  | 2 | 1 | Oxidation (M)        | 72140  | hypothetical protein POPTR_0002s23950g [Populus trichocarpa]               |
| 1261 | 18395 | gi 566182365 | 80.06 | 8  | 2 | 2 |                      | 34377  | hypothetical protein POPTR_0008s04660g [Populus trichocarpa]               |
| 1178 | 1844  | gi 731439310 | 79.91 | 2  | 1 | 1 |                      | 71338  | PREDICTED: fumarylacetoacetase isoform X2 [Vitis vinifera]                 |
| 403  | 18170 | gi 566157284 | 79.84 | 4  | 3 | 1 | Carbamidomethylation | 48713  | chloroplast nucleoid DNA-binding family protein [Populus trichocarpa]      |

|      |       |              |       |    |   |   |                      |        |                                                                                            |
|------|-------|--------------|-------|----|---|---|----------------------|--------|--------------------------------------------------------------------------------------------|
| 882  | 18339 | gi 225462348 | 79.84 | 8  | 3 | 3 | Carbamidomethylation | 57728  | PREDICTED: zinc finger CCCH domain-containing protein 37 isoform X2 [Vitis vinifera]       |
| 272  | 18717 | gi 224059156 | 79.77 | 18 | 2 | 1 |                      | 14119  | Profilin 3 family protein [Populus trichocarpa]                                            |
| 803  | 18121 | gi 566172301 | 79.68 | 6  | 4 | 2 | Carbamidomethylation | 54904  | disulfide-isomerase family protein [Populus trichocarpa]                                   |
| 1172 | 854   | gi 731402959 | 79.56 | 5  | 2 | 1 |                      | 35210  | PREDICTED: probable quinone oxidoreductase [Vitis vinifera]                                |
| 1390 | 782   | gi 225458719 | 79.47 | 7  | 3 | 2 | Carbamidomethylation | 63799  | PREDICTED: D-3-phosphoglycerate dehydrogenase 3 chloroplastic-like [Vitis vinifera]        |
| 589  | 17620 | gi 224058427 | 79.05 | 9  | 3 | 3 |                      | 28418  | reticulon family protein [Populus trichocarpa]                                             |
| 746  | 1211  | gi 731391365 | 78.92 | 4  | 2 | 1 | Carbamidomethylation | 52738  | PREDICTED: acetolactate synthase small subunit 2 chloroplastic isoform X2 [Vitis vinifera] |
| 637  | 866   | gi 225425304 | 78.91 | 37 | 3 | 3 | Carbamidomethylation | 9611   | PREDICTED: 40S ribosomal protein S27-2 [Vitis vinifera]                                    |
| 924  | 16961 | gi 566166593 | 78.84 | 4  | 4 | 1 |                      | 122467 | hypothetical protein POPTR_0004s14960g [Populus trichocarpa]                               |
| 999  | 669   | gi 731386337 | 78.8  | 19 | 4 | 2 | Carbamidomethylation | 20640  | PREDICTED: serine/arginine-rich splicing factor RSZ22 isoform X2 [Vitis vinifera]          |

|      |       |              |       |    |   |   |                      |        |                                                                                            |
|------|-------|--------------|-------|----|---|---|----------------------|--------|--------------------------------------------------------------------------------------------|
| 552  | 1269  | gi 225459906 | 78.76 | 5  | 2 | 1 |                      | 34942  | PREDICTED: probable fructokinase-5 [Vitis vinifera]                                        |
| 590  | 784   | gi 225462809 | 78.69 | 4  | 2 | 2 |                      | 60994  | PREDICTED: 2-hydroxyacyl-CoA lyase [Vitis vinifera]                                        |
| 1037 | 341   | gi 731391907 | 78.62 | 6  | 3 | 3 |                      | 67493  | PREDICTED: anthranilate synthase alpha subunit 2 chloroplastic isoform X2 [Vitis vinifera] |
| 769  | 61055 | gi 224081483 | 78.38 | 15 | 3 | 3 |                      | 15916  | hypothetical protein POPTR_0005s10440g [Populus trichocarpa]                               |
| 998  | 306   | gi 731438745 | 78.33 | 5  | 4 | 3 |                      | 92847  | PREDICTED: DNA replication licensing factor MCM6 [Vitis vinifera]                          |
| 356  | 17645 | gi 566146919 | 78.19 | 4  | 3 | 1 |                      | 68964  | hypothetical protein POPTR_0001s03040g [Populus trichocarpa]                               |
| 878  | 1353  | gi 225428047 | 78.05 | 23 | 3 | 2 | Carbamidomethylation | 17518  | PREDICTED: SKP1-like protein 1A isoform X5 [Vitis vinifera]                                |
| 986  | 17900 | gi 224104697 | 77.81 | 16 | 3 | 1 |                      | 20848  | lactoylglutathione lyase family protein [Populus trichocarpa]                              |
| 490  | 17131 | gi 224057882 | 77.72 | 3  | 3 | 2 |                      | 89495  | outer membrane family protein [Populus trichocarpa]                                        |
| 768  | 1503  | gi 225461001 | 77.71 | 7  | 2 | 2 |                      | 46284  | PREDICTED: polyadenylate-binding protein RBP45-like [Vitis vinifera]                       |
| 651  | 18418 | gi 566234529 | 77.26 | 29 | 4 | 2 | Carbamidomethylation | 13103  | hypothetical protein POPTR_0019s07730g [Populus trichocarpa]                               |
| 992  | 18184 | gi 224122176 | 77.17 | 3  | 3 | 2 |                      | 113456 | hypothetical protein POPTR_0012s10830g [Populus trichocarpa]                               |



|      |       |              |       |    |   |   |                      |        |                                                                                                 |
|------|-------|--------------|-------|----|---|---|----------------------|--------|-------------------------------------------------------------------------------------------------|
| 1157 | 600   | gi 359490767 | 77.17 | 11 | 2 | 1 |                      | 23070  | PREDICTED: nascent polypeptide-associated complex subunit alpha-like protein 2 [Vitis vinifera] |
| 581  | 18015 | gi 224116326 | 77.13 | 9  | 3 | 1 |                      | 36463  | Leucoanthocyanidin reductase family protein [Populus trichocarpa]                               |
| 868  | 18469 | gi 566187699 | 76.92 | 8  | 3 | 3 |                      | 36049  | ubiquitin fusion degradation UFD1 family protein [Populus trichocarpa]                          |
| 736  | 1667  | gi 225432306 | 76.69 | 30 | 3 | 3 | Carbamidomethylation | 9210   | PREDICTED: 40S ribosomal protein S21 [Vitis vinifera]                                           |
| 1026 | 844   | gi 526117645 | 76.69 | 2  | 3 | 1 |                      | 153182 | magnesium chelatase H subunit [Vitis vinifera]                                                  |
| 898  | 1573  | gi 731428130 | 76.69 | 12 | 4 | 1 |                      | 49925  | PREDICTED: kynurenine--oxoglutarate transaminase 1 [Vitis vinifera]                             |
| 732  | 18175 | gi 566202597 | 76.54 | 17 | 2 | 1 |                      | 16336  | hypothetical protein POPTR_0014s04880g [Populus trichocarpa]                                    |
| 141  | 19801 | gi 224093204 | 76.53 | 5  | 2 | 2 | Carbamidomethylation | 35946  | peroxidase precursor family protein [Populus trichocarpa]                                       |
| 748  | 17779 | gi 224136089 | 76.2  | 9  | 2 | 2 |                      | 26956  | hypothetical protein POPTR_0015s10490g [Populus trichocarpa]                                    |
| 1255 | 19537 | gi 566201057 | 75.88 | 9  | 3 | 3 |                      | 42430  | hypothetical protein POPTR_0013s13100g [Populus trichocarpa]                                    |
| 1264 | 1135  | gi 225458305 | 75.78 | 8  | 3 | 2 |                      | 62648  | PREDICTED: glucose-6-phosphate isomerase cytosolic [Vitis vinifera]                             |

|      |       |              |       |    |   |   |                      |       |                                                                                                                                                 |
|------|-------|--------------|-------|----|---|---|----------------------|-------|-------------------------------------------------------------------------------------------------------------------------------------------------|
| 1086 | 1861  | gi 731428311 | 75.61 | 4  | 2 | 1 |                      | 51458 | PREDICTED:<br>bifunctional aspartate<br>aminotransferase and<br>glutamate/aspartate-<br>prephenate<br>aminotransferase-like<br>[Vitis vinifera] |
| 1317 | 17838 | gi 224072208 | 75.55 | 9  | 2 | 1 | Carbamidomethylation | 38044 | UDP-glucose 4-<br>epimerase family<br>protein [Populus<br>trichocarpa]                                                                          |
| 673  | 1500  | gi 225455141 | 75.43 | 37 | 2 | 1 |                      | 11333 | PREDICTED: protein<br>SPIRAL1-like 1 [Vitis<br>vinifera]                                                                                        |
| 602  | 17249 | gi 566161432 | 75.37 | 4  | 3 | 1 |                      | 74324 | acyl-CoA oxidase<br>family protein [Populus<br>trichocarpa]                                                                                     |
| 1141 | 17260 | gi 224102365 | 75.34 | 7  | 3 | 3 | Carbamidomethylation | 59185 | T-complex protein 1<br>[Populus trichocarpa]                                                                                                    |
| 620  | 604   | gi 731401756 | 75.32 | 5  | 2 | 2 |                      | 45526 | PREDICTED:<br>oligouridylate-binding<br>protein 1B isoform X2<br>[Vitis vinifera]                                                               |
| 909  | 1267  | gi 359494718 | 75.3  | 9  | 3 | 1 |                      | 34301 | PREDICTED: LOW<br>QUALITY PROTEIN:<br>basic endochitinase<br>[Vitis vinifera]                                                                   |
| 1104 | 1995  | gi 731412542 | 75.22 | 5  | 3 | 3 |                      | 58149 | PREDICTED:<br>uncharacterized protein<br>LOC100244432<br>isoform X4 [Vitis<br>vinifera]                                                         |
| 1282 | 17680 | gi 566162135 | 75.21 | 10 | 3 | 1 |                      | 27086 | hypothetical protein<br>POPTR_0003s11350g<br>[Populus trichocarpa]                                                                              |

|      |       |              |       |    |   |   |                      |       |                                                                                                    |
|------|-------|--------------|-------|----|---|---|----------------------|-------|----------------------------------------------------------------------------------------------------|
| 621  | 794   | gi 731374652 | 75.11 | 6  | 2 | 1 |                      | 58335 | PREDICTED:<br>aldehyde<br>dehydrogenase family 2<br>member B4<br>mitochondrial [Vitis<br>vinifera] |
| 1465 | 715   | gi 731436956 | 75.03 | 7  | 3 | 3 | Carbamidomethylation | 39713 | PREDICTED:<br>porphobilinogen<br>deaminase<br>chloroplatic [Vitis<br>vinifera]                     |
| 1199 | 17602 | gi 566191545 | 74.79 | 8  | 2 | 1 | Carbamidomethylation | 40561 | hypothetical protein<br>POPTR_0010s18770g<br>[Populus trichocarpa]                                 |
| 840  | 17497 | gi 566205259 | 74.77 | 18 | 4 | 2 | Carbamidomethylation | 29312 | hypothetical protein<br>POPTR_0015s00690g<br>[Populus trichocarpa]                                 |
| 1204 | 1643  | gi 225452186 | 74.67 | 10 | 3 | 3 |                      | 30725 | PREDICTED:<br>prohibitin-3<br>mitochondrial [Vitis<br>vinifera]                                    |
| 1019 | 2338  | gi 359496232 | 74.59 | 11 | 2 | 2 |                      | 21717 | PREDICTED: probable<br>NAD(P)H<br>dehydrogenase<br>(quinone) FQR1-like 1<br>[Vitis vinifera]       |
| 1051 | 1439  | gi 731428465 | 74.57 | 6  | 2 | 2 |                      | 37487 | PREDICTED:<br>thylakoid lumenal 29<br>kDa protein<br>chloroplatic [Vitis<br>vinifera]              |
| 384  | 18371 | gi 224116936 | 74.42 | 4  | 2 | 1 |                      | 63722 | pyruvate decarboxylase<br>family protein [Populus<br>trichocarpa]                                  |
| 690  | 2306  | gi 526117918 | 74.36 | 5  | 1 | 1 |                      | 33457 | basic endochitinase<br>precursor [Vitis<br>vinifera]                                               |

|      |       |              |       |    |   |   |                      |       |                                                                                 |
|------|-------|--------------|-------|----|---|---|----------------------|-------|---------------------------------------------------------------------------------|
| 1248 | 60998 | gi 566171779 | 74.05 | 3  | 3 | 2 | Carbamidomethylation | 84881 | hypothetical protein POPTR_0005s16650g partial [Populus trichocarpa]            |
| 456  | 19091 | gi 566214265 | 73.76 | 18 | 2 | 1 |                      | 14037 | hypothetical protein POPTR_0018s04840g [Populus trichocarpa]                    |
| 496  | 18733 | gi 224143583 | 73.6  | 11 | 3 | 3 |                      | 17416 | peroxiredoxin family protein [Populus trichocarpa]                              |
| 301  | 753   | gi 731391225 | 73.47 | 10 | 3 | 1 |                      | 38311 | PREDICTED: endochitinase A-like isoform X1 [Vitis vinifera]                     |
| 818  | 18849 | gi 224065507 | 73.43 | 14 | 1 | 1 |                      | 15080 | Photosystem I reaction center subunit IV A family protein [Populus trichocarpa] |
| 856  | 18092 | gi 566156270 | 73.37 | 3  | 3 | 1 | Carbamidomethylation | 75868 | hypothetical protein POPTR_0002s04800g [Populus trichocarpa]                    |
| 1364 | 18666 | gi 566197993 | 73.21 | 8  | 2 | 1 |                      | 29095 | hypothetical protein POPTR_0012s11630g [Populus trichocarpa]                    |
| 1018 | 18943 | gi 224140195 | 73.13 | 12 | 2 | 2 |                      | 30031 | 29 kDa ribonucleoprotein [Populus trichocarpa]                                  |
| 607  | 2407  | gi 359495882 | 73.06 | 8  | 3 | 1 | Carbamidomethylation | 39482 | PREDICTED: 2-alkenal reductase (NADP(+)-dependent) [Vitis vinifera]             |
| 605  | 903   | gi 225453158 | 72.91 | 9  | 3 | 2 | Carbamidomethylation | 41234 | PREDICTED: probable fructokinase-6 chloroplastic [Vitis vinifera]               |
| 813  | 423   | gi 225434133 | 72.85 | 6  | 2 | 2 |                      | 40613 | PREDICTED: cysteine synthase chloroplastic/chromopl astic [Vitis vinifera]      |

|      |       |              |       |    |   |   |                      |       |                                                                                                      |
|------|-------|--------------|-------|----|---|---|----------------------|-------|------------------------------------------------------------------------------------------------------|
| 1366 | 814   | gi 225433414 | 72.8  | 8  | 2 | 2 |                      | 36594 | PREDICTED: probable voltage-gated potassium channel subunit beta [Vitis vinifera]                    |
| 829  | 1201  | gi 225454278 | 72.76 | 6  | 2 | 2 |                      | 40499 | PREDICTED: bifunctional L-3-cyanoalanine synthase/cysteine synthase 1 mitochondrial [Vitis vinifera] |
| 1168 | 942   | gi 225453935 | 72.68 | 10 | 3 | 3 |                      | 40128 | PREDICTED: 4-hydroxy-tetrahydrodipicolinate synthase chloroplastic [Vitis vinifera]                  |
| 413  | 18297 | gi 566192144 | 72.63 | 6  | 2 | 2 |                      | 36328 | hypothetical protein POPTR_0010s22170g [Populus trichocarpa]                                         |
| 522  | 17341 | gi 566238007 | 72.59 | 9  | 2 | 2 | Carbamidomethylation | 30925 | Chlorophyll a-b binding protein CP26 [Populus trichocarpa]                                           |
| 1349 | 2125  | gi 731415654 | 72.53 | 3  | 2 | 2 |                      | 73684 | PREDICTED: acyl-CoA-binding domain-containing protein 4-like isoform X2 [Vitis vinifera]             |
| 737  | 18199 | gi 566185810 | 72.16 | 4  | 3 | 1 |                      | 94037 | beta-galactosidase family protein [Populus trichocarpa]                                              |
| 930  | 18534 | gi 224063774 | 72.11 | 6  | 2 | 1 | Carbamidomethylation | 55604 | 3-phosphoshikimate 1-carboxyvinyltransferase family protein [Populus trichocarpa]                    |
| 1033 | 17511 | gi 566203118 | 72.03 | 7  | 2 | 2 | Carbamidomethylation | 27871 | phosphomannomutase family protein [Populus trichocarpa]                                              |
| 454  | 1956  | gi 225442434 | 72    | 17 | 2 | 1 |                      | 14228 | PREDICTED: profilin-1 [Vitis vinifera]                                                               |

|      |       |              |       |    |   |   |                      |       |                                                                                          |
|------|-------|--------------|-------|----|---|---|----------------------|-------|------------------------------------------------------------------------------------------|
| 984  | 18859 | gi 224107333 | 71.99 | 26 | 2 | 2 |                      | 9716  | hypothetical protein POPTR_0010s02580g [Populus trichocarpa]                             |
| 1038 | 2373  | gi 731384063 | 71.91 | 7  | 3 | 1 |                      | 43516 | PREDICTED: LL-diaminopimelate aminotransferase chloroplastic isoform X7 [Vitis vinifera] |
| 857  | 18017 | gi 566196102 | 71.7  | 10 | 2 | 1 |                      | 24822 | hypothetical protein POPTR_0012s00690g [Populus trichocarpa]                             |
| 850  | 17506 | gi 566243399 | 71.7  | 8  | 2 | 2 |                      | 33846 | hypothetical protein POPTR_0019s13040g [Populus trichocarpa]                             |
| 661  | 18856 | gi 224099491 | 71.5  | 24 | 2 | 1 |                      | 10451 | hypothetical protein POPTR_0008s12950g [Populus trichocarpa]                             |
| 711  | 1505  | gi 731426023 | 71.47 | 30 | 2 | 1 |                      | 12464 | PREDICTED: protein SPIRAL1-like 1 isoform X2 [Vitis vinifera]                            |
| 1134 | 17479 | gi 224097148 | 71.39 | 9  | 4 | 3 |                      | 41439 | GDP-mannose 4 family protein [Populus trichocarpa]                                       |
| 864  | 18273 | gi 224106686 | 71.36 | 10 | 2 | 1 |                      | 24434 | elongation factor 1B alpha-subunit 2 family protein [Populus trichocarpa]                |
| 1144 | 18280 | gi 566202445 | 71.36 | 3  | 2 | 2 |                      | 69760 | hypothetical protein POPTR_0014s04320g [Populus trichocarpa]                             |
| 1046 | 1933  | gi 225455762 | 71.32 | 5  | 3 | 3 | Carbamidomethylation | 67078 | PREDICTED: probable phenylalanine--tRNA ligase beta subunit [Vitis vinifera]             |
| 1092 | 868   | gi 225455106 | 71.12 | 7  | 2 | 2 |                      | 33350 | PREDICTED: protein BOBBER 1 [Vitis vinifera]                                             |

|      |       |              |       |    |   |   |                      |        |                                                                                                                                    |
|------|-------|--------------|-------|----|---|---|----------------------|--------|------------------------------------------------------------------------------------------------------------------------------------|
| 1156 | 1849  | gi 731397296 | 71.11 | 5  | 2 | 1 |                      | 44232  | PREDICTED: bifunctional aspartate aminotransferase and glutamate/aspartate-prephenate aminotransferase isoform X2 [Vitis vinifera] |
| 1244 | 18188 | gi 566147227 | 70.85 | 4  | 3 | 3 | Carbamidomethylation | 110034 | hypothetical protein POPTR_0001s04700g [Populus trichocarpa]                                                                       |
| 1053 | 1184  | gi 731387210 | 70.82 | 7  | 2 | 1 |                      | 42062  | PREDICTED: splicing factor U2af large subunit B isoform X4 [Vitis vinifera]                                                        |
| 1042 | 28950 | gi 359483854 | 70.8  | 11 | 4 | 4 | Carbamidomethylation | 49342  | PREDICTED: 3-oxoacyl-[acyl-carrier-protein] synthase I chloroplast [Vitis vinifera]                                                |
| 1643 | 18052 | gi 566163395 | 70.64 | 9  | 2 | 2 |                      | 36315  | hypothetical protein POPTR_0003s18620g [Populus trichocarpa]                                                                       |
| 1124 | 947   | gi 225463556 | 70.49 | 3  | 3 | 1 |                      | 125024 | PREDICTED: protein TOPLESS [Vitis vinifera]                                                                                        |
| 1091 | 915   | gi 225435203 | 70.39 | 15 | 2 | 2 |                      | 15652  | PREDICTED: 40S ribosomal protein S23-like [Vitis vinifera]                                                                         |
| 1622 | 787   | gi 225450299 | 70.31 | 4  | 1 | 1 |                      | 52389  | PREDICTED: citrate synthase mitochondrial [Vitis vinifera]                                                                         |
| 1017 | 17675 | gi 566198526 | 70.26 | 4  | 3 | 2 |                      | 67271  | hypothetical protein POPTR_0012s14780g [Populus trichocarpa]                                                                       |
| 943  | 28901 | gi 566156965 | 70.22 | 11 | 4 | 1 |                      | 51266  | hypothetical protein POPTR_0002s08650g [Populus trichocarpa]                                                                       |

|      |       |              |       |    |   |   |                      |        |                                                                                                     |
|------|-------|--------------|-------|----|---|---|----------------------|--------|-----------------------------------------------------------------------------------------------------|
| 1303 | 243   | gi 225429750 | 70.22 | 2  | 2 | 2 | Carbamidomethylation | 105919 | PREDICTED: coatomer subunit beta-1 [Vitis vinifera]                                                 |
| 1441 | 1091  | gi 225428916 | 70.16 | 8  | 2 | 2 |                      | 39009  | PREDICTED: probable cinnamyl alcohol dehydrogenase 1 [Vitis vinifera]                               |
| 828  | 744   | gi 359497196 | 70.15 | 10 | 2 | 1 |                      | 23133  | PREDICTED: ras-related protein RABH1e [Vitis vinifera]                                              |
| 756  | 1216  | gi 731434246 | 70.1  | 5  | 3 | 3 | Carbamidomethylation | 56111  | PREDICTED: NADH dehydrogenase [ubiquinone] flavoprotein 1 mitochondrial isoform X1 [Vitis vinifera] |
| 641  | 2452  | gi 225439785 | 70.1  | 8  | 2 | 1 |                      | 26785  | PREDICTED: glutathione S-transferase L3 [Vitis vinifera]                                            |
| 985  | 2329  | gi 225435002 | 70.09 | 6  | 1 | 1 | Carbamidomethylation | 27396  | PREDICTED: osmotin-like protein [Vitis vinifera]                                                    |
| 1203 | 1726  | gi 225440169 | 69.84 | 5  | 3 | 2 |                      | 57401  | PREDICTED: cytochrome P450 98A2 [Vitis vinifera]                                                    |
| 1197 | 1177  | gi 225441573 | 69.7  | 3  | 3 | 3 | Carbamidomethylation | 107099 | PREDICTED: eukaryotic translation initiation factor 3 subunit C [Vitis vinifera]                    |
| 819  | 18439 | gi 224081475 | 69.65 | 5  | 2 | 1 |                      | 58488  | hypothetical protein POPTR_0005s10320g [Populus trichocarpa]                                        |
| 1155 | 2513  | gi 731440658 | 69.64 | 33 | 3 | 1 |                      | 13203  | PREDICTED: ras-related protein RIC1-like partial [Vitis vinifera]                                   |



|      |       |              |       |    |   |   |                      |        |                                                                                  |
|------|-------|--------------|-------|----|---|---|----------------------|--------|----------------------------------------------------------------------------------|
| 537  | 19104 | gi 224078057 | 69.29 | 8  | 2 | 2 |                      | 28150  | phosphorylase family protein [Populus trichocarpa]                               |
| 1132 | 19116 | gi 224078882 | 69.26 | 8  | 2 | 2 | Carbamidomethylation | 34470  | oxidoreductase family protein [Populus trichocarpa]                              |
| 1154 | 17864 | gi 566153954 | 68.71 | 10 | 3 | 3 |                      | 31003  | phosphatase 2C family protein [Populus trichocarpa]                              |
| 1068 | 17463 | gi 224133304 | 68.69 | 3  | 2 | 1 |                      | 60007  | hypothetical protein POPTR_0015s07690g [Populus trichocarpa]                     |
| 816  | 18329 | gi 224120174 | 68.65 | 2  | 2 | 1 |                      | 68576  | Phosphoglucomutase family protein [Populus trichocarpa]                          |
| 1090 | 18064 | gi 566149112 | 68.59 | 17 | 3 | 1 |                      | 22610  | GTP-binding family protein [Populus trichocarpa]                                 |
| 1328 | 18888 | gi 225423849 | 68.56 | 4  | 2 | 2 |                      | 65257  | PREDICTED: protein decapping 5 [Vitis vinifera]                                  |
| 1003 | 648   | gi 731424733 | 68.47 | 1  | 2 | 2 |                      | 241380 | PREDICTED: glutamate synthase 1 [NADH] chloroplastic isoform X2 [Vitis vinifera] |
| 936  | 812   | gi 731423236 | 68.22 | 5  | 3 | 1 |                      | 65721  | PREDICTED: monocopper oxidase-like protein SKU5 [Vitis vinifera]                 |
| 555  | 1075  | gi 526117894 | 68.22 | 7  | 3 | 1 |                      | 36735  | anthocyanidin reductase [Vitis vinifera]                                         |
| 1171 | 2854  | gi 731408416 | 68.14 | 4  | 2 | 1 |                      | 53964  | PREDICTED: serine carboxypeptidase-like 13 [Vitis vinifera]                      |
| 716  | 17372 | gi 224063299 | 68.07 | 5  | 3 | 1 |                      | 67707  | hypothetical protein POPTR_0002s10420g [Populus trichocarpa]                     |

|      |       |              |       |    |   |   |                      |       |                                                                                                           |
|------|-------|--------------|-------|----|---|---|----------------------|-------|-----------------------------------------------------------------------------------------------------------|
| 1127 | 683   | gi 225456085 | 68.06 | 5  | 3 | 3 |                      | 57173 | PREDICTED:<br>eukaryotic peptide<br>chain release factor<br>GTP-binding subunit<br>ERF3A [Vitis vinifera] |
| 847  | 29074 | gi 225461628 | 68.03 | 4  | 2 | 1 |                      | 45420 | PREDICTED: UBPI-<br>associated protein 2C<br>[Vitis vinifera]                                             |
| 774  | 2011  | gi 731437310 | 67.96 | 5  | 2 | 1 | Carbamidomethylation | 52411 | PREDICTED:<br>acetolactate synthase<br>small subunit 2<br>chloroplastic [Vitis<br>vinifera]               |
| 1101 | 1570  | gi 731427302 | 67.91 | 10 | 3 | 3 |                      | 17173 | PREDICTED:<br>transcription factor<br>BTF3 homolog 4 [Vitis<br>vinifera]                                  |
| 1143 | 18312 | gi 224082494 | 67.84 | 5  | 2 | 1 |                      | 38884 | peroxidase precursor<br>family protein [Populus<br>trichocarpa]                                           |
| 1436 | 597   | gi 225441924 | 67.46 | 4  | 1 | 1 | Carbamidomethylation | 51126 | PREDICTED:<br>eukaryotic translation<br>initiation factor 3<br>subunit E [Vitis<br>vinifera]              |
| 962  | 2234  | gi 225441977 | 67.35 | 4  | 3 | 1 |                      | 66737 | PREDICTED:<br>pectinesterase [Vitis<br>vinifera]                                                          |
| 1169 | 19371 | gi 566184421 | 67.33 | 8  | 3 | 3 |                      | 45388 | hypothetical protein<br>POPTR_0008s17030g<br>[Populus trichocarpa]                                        |
| 763  | 1752  | gi 225469443 | 67.27 | 13 | 3 | 1 |                      | 23539 | PREDICTED:<br>uncharacterized protein<br>LOC100266972 [Vitis<br>vinifera]                                 |

|      |       |              |       |    |   |   |                      |        |                                                                              |
|------|-------|--------------|-------|----|---|---|----------------------|--------|------------------------------------------------------------------------------|
| 1008 | 1358  | gi 731409226 | 66.92 | 6  | 3 | 2 |                      | 43860  | PREDICTED: 3-hydroxyisobutyryl-CoA hydrolase-like protein 5 [Vitis vinifera] |
| 941  | 18678 | gi 566210985 | 66.8  | 6  | 2 | 2 | Carbamidomethylation | 51941  | glycosyl hydrolase family 17 family protein [Populus trichocarpa]            |
| 1350 | 1372  | gi 225462440 | 66.71 | 3  | 2 | 2 |                      | 107317 | PREDICTED: serine/threonine-protein phosphatase BSL3 [Vitis vinifera]        |
| 1158 | 949   | gi 225457152 | 66.67 | 4  | 2 | 1 |                      | 54621  | PREDICTED: betaine aldehyde dehydrogenase 2 mitochondrial [Vitis vinifera]   |
| 1022 | 2307  | gi 225441664 | 66.62 | 5  | 1 | 1 |                      | 36307  | PREDICTED: uncharacterized protein LOC100255512 [Vitis vinifera]             |
| 1241 | 17094 | gi 224065699 | 66.53 | 2  | 1 | 1 |                      | 75559  | Cell division protein ftsH [Populus trichocarpa]                             |
| 887  | 876   | gi 225429341 | 66.39 | 6  | 3 | 3 | Carbamidomethylation | 44078  | PREDICTED: 3-oxo-Delta(4-5)-steroid 5-beta-reductase-like [Vitis vinifera]   |
| 1023 | 18144 | gi 224073967 | 66.16 | 8  | 1 | 1 |                      | 15188  | photosystem I 11K family protein [Populus trichocarpa]                       |
| 386  | 914   | gi 225440109 | 66.03 | 24 | 3 | 1 |                      | 10658  | PREDICTED: 10 kDa chaperonin [Vitis vinifera]                                |
| 572  | 19089 | gi 566149765 | 65.78 | 3  | 1 | 1 |                      | 43680  | 3-isopropylmalate dehydrogenase 2 family protein [Populus trichocarpa]       |

|      |       |              |       |    |   |   |                      |        |                                                                                            |
|------|-------|--------------|-------|----|---|---|----------------------|--------|--------------------------------------------------------------------------------------------|
| 622  | 18430 | gi 224064818 | 65.76 | 4  | 2 | 1 |                      | 47984  | hypothetical protein POPTR_0002s22410g [Populus trichocarpa]                               |
| 1283 | 19228 | gi 224086367 | 65.69 | 10 | 2 | 1 |                      | 27400  | Proteasome subunit alpha type 4 family protein [Populus trichocarpa]                       |
| 982  | 17498 | gi 566160463 | 65.65 | 7  | 2 | 2 |                      | 49456  | hypothetical protein POPTR_0003s02420g [Populus trichocarpa]                               |
| 1052 | 2095  | gi 225447745 | 65.59 | 8  | 1 | 1 |                      | 27216  | PREDICTED: chlorophyll a-b binding protein CP24 10A chloroplastic [Vitis vinifera]         |
| 1271 | 18310 | gi 224143674 | 65.5  | 11 | 3 | 3 |                      | 38385  | fructose-1 family protein [Populus trichocarpa]                                            |
| 885  | 653   | gi 225449060 | 65.3  | 3  | 2 | 2 |                      | 62143  | PREDICTED: protein disulfide isomerase-like 1-4 [Vitis vinifera]                           |
| 927  | 16960 | gi 566211039 | 65.2  | 5  | 4 | 4 |                      | 124467 | DegP protease family protein [Populus trichocarpa]                                         |
| 1280 | 18523 | gi 566146801 | 65.15 | 8  | 3 | 1 |                      | 30343  | Mitochondrial carnitine/acylcarnitine carrier-like family protein [Populus trichocarpa]    |
| 1100 | 2594  | gi 731382912 | 65.1  | 3  | 2 | 2 |                      | 81725  | PREDICTED: subtilisin-like protease [Vitis vinifera]                                       |
| 971  | 2314  | gi 225452570 | 65.1  | 12 | 1 | 1 | Carbamidomethylation | 16225  | PREDICTED: ferredoxin-thioredoxin reductase catalytic chain chloroplastic [Vitis vinifera] |
| 1916 | 1362  | gi 225440230 | 64.97 | 7  | 1 | 1 |                      | 29238  | PREDICTED: dihydrofolate reductase [Vitis vinifera]                                        |

|      |       |              |       |    |   |   |                      |        |                                                                                                          |
|------|-------|--------------|-------|----|---|---|----------------------|--------|----------------------------------------------------------------------------------------------------------|
| 728  | 1063  | gi 359491801 | 64.88 | 4  | 3 | 3 |                      | 83367  | PREDICTED: dolichyl-diphosphooligosaccharide--protein glycosyltransferase subunit STT3B [Vitis vinifera] |
| 890  | 577   | gi 731438110 | 64.86 | 5  | 2 | 2 | Carbamidomethylation | 88481  | PREDICTED: probable cytosolic oligopeptidase A [Vitis vinifera]                                          |
| 1009 | 18299 | gi 731436460 | 64.85 | 3  | 4 | 4 | Carbamidomethylation | 123310 | PREDICTED: leucine--tRNA ligase cytoplasmic-like [Vitis vinifera]                                        |
| 1486 | 2627  | gi 731393556 | 64.84 | 8  | 2 | 2 |                      | 29837  | PREDICTED: rhodanese-like/PpiC domain-containing protein 12 isoform X2 [Vitis vinifera]                  |
| 970  | 1354  | gi 731430037 | 64.61 | 4  | 1 | 1 | Carbamidomethylation | 43016  | PREDICTED: probable cinnamyl alcohol dehydrogenase 6 [Vitis vinifera]                                    |
| 1256 | 2753  | gi 225429582 | 64.56 | 3  | 2 | 2 |                      | 98913  | PREDICTED: aminopeptidase M1 [Vitis vinifera]                                                            |
| 893  | 19431 | gi 566151403 | 64.55 | 28 | 2 | 2 |                      | 8809   | hypothetical protein POPTR_0001s28090g [Populus trichocarpa]                                             |
| 1308 | 864   | gi 731439997 | 64.52 | 14 | 3 | 2 | Carbamidomethylation | 33522  | PREDICTED: phosphoglycolate phosphatase 1B chloroplastic [Vitis vinifera]                                |
| 951  | 17240 | gi 566202791 | 64.41 | 4  | 2 | 1 |                      | 59276  | t-complex polypeptide 1 family protein [Populus trichocarpa]                                             |

|      |       |              |       |    |   |   |                      |       |                                                                                           |
|------|-------|--------------|-------|----|---|---|----------------------|-------|-------------------------------------------------------------------------------------------|
| 1273 | 2502  | gi 225424908 | 64.31 | 8  | 3 | 2 |                      | 29426 | PREDICTED: mitochondrial outer membrane protein porin of 36 kDa [Vitis vinifera]          |
| 1013 | 920   | gi 225436438 | 64.17 | 19 | 2 | 2 |                      | 10607 | PREDICTED: cyclin-dependent kinases regulatory subunit 1 [Vitis vinifera]                 |
| 1170 | 2442  | gi 225429295 | 64.16 | 8  | 2 | 2 |                      | 25371 | PREDICTED: uncharacterized protein LOC100254416 [Vitis vinifera]                          |
| 1064 | 1010  | gi 225451999 | 63.95 | 5  | 2 | 2 |                      | 59112 | PREDICTED: T-complex protein 1 subunit zeta [Vitis vinifera]                              |
| 1186 | 792   | gi 225465764 | 63.81 | 8  | 3 | 3 |                      | 43403 | PREDICTED: UDP-D-apiose/UDP-D-xylose synthase 2 [Vitis vinifera]                          |
| 1218 | 18384 | gi 224146080 | 63.67 | 14 | 2 | 2 |                      | 17003 | hypothetical protein POPTR_0019s05840g [Populus trichocarpa]                              |
| 1056 | 61273 | gi 225457387 | 63.62 | 8  | 1 | 1 |                      | 26287 | PREDICTED: expansin-A1 [Vitis vinifera]                                                   |
| 660  | 18810 | gi 566209344 | 63.57 | 7  | 2 | 1 |                      | 27361 | In2-1 family protein [Populus trichocarpa]                                                |
| 1257 | 1167  | gi 225457034 | 63.5  | 4  | 2 | 2 | Carbamidomethylation | 51176 | PREDICTED: 1-deoxy-D-xylulose 5-phosphate reductoisomerase chloroplastic [Vitis vinifera] |
| 902  | 17304 | gi 224108085 | 63.32 | 15 | 2 | 2 |                      | 16429 | 40S ribosomal protein S16 [Populus trichocarpa]                                           |

|      |       |              |       |    |   |   |                      |       |                                                                             |
|------|-------|--------------|-------|----|---|---|----------------------|-------|-----------------------------------------------------------------------------|
| 799  | 1233  | gi 225448904 | 63.2  | 5  | 1 | 1 |                      | 48063 | PREDICTED: malate dehydrogenase [NADP] chloroplastic [Vitis vinifera]       |
| 1047 | 17005 | gi 566146555 | 63.08 | 12 | 3 | 3 |                      | 23812 | 60S ribosomal protein L13 [Populus trichocarpa]                             |
| 1129 | 1837  | gi 225428043 | 63.02 | 5  | 2 | 1 | Carbamidomethylation | 49886 | PREDICTED: uncharacterized protein LOC100257179 isoform X1 [Vitis vinifera] |
| 1284 | 18539 | gi 224092348 | 62.95 | 18 | 2 | 2 | Carbamidomethylation | 10699 | hypothetical protein POPTR_0006s25990g [Populus trichocarpa]                |
| 1297 | 1237  | gi 225446509 | 62.87 | 3  | 2 | 2 |                      | 77096 | PREDICTED: acyl-coenzyme A oxidase 3 peroxisomal [Vitis vinifera]           |
| 1467 | 19771 | gi 224106191 | 62.83 | 6  | 2 | 2 | Carbamidomethylation | 35572 | cinnamyl-alcohol dehydrogenase family protein [Populus trichocarpa]         |
| 576  | 61001 | gi 731437331 | 62.8  | 17 | 3 | 1 |                      | 17820 | PREDICTED: 60S ribosomal protein L27a-3 [Vitis vinifera]                    |
| 954  | 17743 | gi 566175322 | 62.7  | 9  | 2 | 2 |                      | 35273 | aldo/keto reductase family protein [Populus trichocarpa]                    |
| 765  | 17207 | gi 566151109 | 62.29 | 6  | 3 | 1 | Carbamidomethylation | 37403 | hypothetical protein POPTR_0001s26400g [Populus trichocarpa]                |
| 1066 | 737   | gi 225424719 | 62.06 | 3  | 2 | 2 | Carbamidomethylation | 78467 | PREDICTED: threonine--tRNA ligase mitochondrial [Vitis vinifera]            |

|      |       |              |       |    |   |   |                      |       |                                                                                         |
|------|-------|--------------|-------|----|---|---|----------------------|-------|-----------------------------------------------------------------------------------------|
| 739  | 1743  | gi 225441809 | 62.06 | 29 | 3 | 3 |                      | 8917  | PREDICTED:<br>uncharacterized protein<br>LOC100245204<br>isoform X3 [Vitis<br>vinifera] |
| 1418 | 18109 | gi 566168240 | 61.86 | 2  | 1 | 1 | Carbamidomethylation | 55680 | hypothetical protein<br>POPTR_0004s23390g<br>[Populus trichocarpa]                      |
| 888  | 18288 | gi 224099811 | 61.74 | 8  | 2 | 1 | Oxidation (M)        | 34198 | O-acetylserine<br>(thiol)lyase family<br>protein [Populus<br>trichocarpa]               |
| 1265 | 19527 | gi 566204649 | 61.64 | 6  | 2 | 2 |                      | 42787 | hypothetical protein<br>POPTR_0014s16700g<br>[Populus trichocarpa]                      |
| 503  | 1639  | gi 526118028 | 61.4  | 7  | 3 | 2 |                      | 30741 | aquaporin-like [Vitis<br>vinifera]                                                      |
| 820  | 774   | gi 225444063 | 61.31 | 6  | 2 | 2 | Carbamidomethylation | 44423 | PREDICTED: obg-like<br>ATPase 1 [Vitis<br>vinifera]                                     |
| 906  | 1750  | gi 225447488 | 61.3  | 4  | 2 | 1 |                      | 63568 | PREDICTED:<br>uncharacterized protein<br>LOC100266500 [Vitis<br>vinifera]               |
| 1471 | 1547  | gi 225454994 | 61.18 | 9  | 2 | 1 |                      | 28211 | PREDICTED: peptide<br>methionine sulfoxide<br>reductase A1-like [Vitis<br>vinifera]     |
| 1028 | 1287  | gi 225460991 | 61.02 | 2  | 1 | 1 |                      | 86153 | PREDICTED: heat<br>shock 70 kDa protein<br>16 [Vitis vinifera]                          |
| 1040 | 17909 | gi 224133898 | 60.67 | 8  | 2 | 2 | Carbamidomethylation | 53810 | aspartyl<br>aminopeptidase family<br>protein [Populus<br>trichocarpa]                   |



|      |       |              |       |    |   |   |                      |        |                                                                                     |
|------|-------|--------------|-------|----|---|---|----------------------|--------|-------------------------------------------------------------------------------------|
| 1247 | 609   | gi 731392506 | 60.66 | 3  | 3 | 3 | Carbamidomethylation | 129324 | PREDICTED: carbamoyl-phosphate synthase large chain chloroplastic [Vitis vinifera]  |
| 931  | 29005 | gi 224084784 | 60.63 | 3  | 2 | 1 |                      | 61214  | glycine hydroxymethyltransferase family protein [Populus trichocarpa]               |
| 1365 | 20409 | gi 566215019 | 60.53 | 10 | 2 | 2 | Oxidation (M)        | 36357  | hypothetical protein POPTR_0018s09500g [Populus trichocarpa]                        |
| 1676 | 18611 | gi 224077508 | 60.45 | 6  | 2 | 2 |                      | 39890  | putative protein phosphatase [Populus trichocarpa]                                  |
| 353  | 18536 | gi 566165881 | 60.39 | 6  | 2 | 2 |                      | 27272  | mangrin family protein [Populus trichocarpa]                                        |
| 783  | 19856 | gi 566210416 | 60.36 | 6  | 2 | 1 | Carbamidomethylation | 38764  | hypothetical protein POPTR_0017s00310g [Populus trichocarpa]                        |
| 1276 | 17918 | gi 224063643 | 60.36 | 14 | 2 | 2 | Carbamidomethylation | 17863  | 40S ribosomal protein S11 [Populus trichocarpa]                                     |
| 1021 | 19686 | gi 224141787 | 60.29 | 6  | 1 | 1 |                      | 27379  | 20S proteasome beta subunit G1 family protein [Populus trichocarpa]                 |
| 1118 | 1382  | gi 359489656 | 60.28 | 6  | 2 | 2 |                      | 52031  | PREDICTED: probable polygalacturonase [Vitis vinifera]                              |
| 1867 | 18737 | gi 566200149 | 60.26 | 4  | 1 | 1 |                      | 47169  | eIF4-gamma/eIF5/eIF2-epsilon domain-containing family protein [Populus trichocarpa] |
| 1044 | 19744 | gi 224137260 | 59.75 | 12 | 1 | 1 |                      | 11459  | hypothetical protein POPTR_0016s01100g [Populus trichocarpa]                        |

|      |       |              |       |   |   |   |                      |        |                                                                                                                       |
|------|-------|--------------|-------|---|---|---|----------------------|--------|-----------------------------------------------------------------------------------------------------------------------|
| 719  | 1615  | gi 359497056 | 59.7  | 5 | 2 | 1 |                      | 35941  | PREDICTED:<br>peroxidase 10-like<br>[Vitis vinifera]                                                                  |
| 1329 | 1196  | gi 731405060 | 59.68 | 4 | 2 | 2 |                      | 73829  | PREDICTED:<br>phospho-N-<br>acetylmuramoyl-<br>pentapeptide-<br>transferase homolog<br>isoform X2 [Vitis<br>vinifera] |
| 1469 | 1845  | gi 225434277 | 59.49 | 8 | 2 | 2 |                      | 22623  | PREDICTED: CBS<br>domain-containing<br>protein CBSX3<br>mitochondrial [Vitis<br>vinifera]                             |
| 1159 | 17641 | gi 566204499 | 59.29 | 7 | 2 | 1 |                      | 47320  | thioredoxin family<br>protein [Populus<br>trichocarpa]                                                                |
| 1675 | 18515 | gi 566245088 | 59.26 | 6 | 2 | 1 |                      | 33717  | Xyloglucan<br>endotransglucosylase/h<br>ydrolase protein 9<br>precursor [Populus<br>trichocarpa]                      |
| 634  | 1144  | gi 731392975 | 59.13 | 3 | 3 | 1 |                      | 103818 | PREDICTED: linoleate<br>13S-lipoxygenase 2-1<br>chloroplastic-like [Vitis<br>vinifera]                                |
| 1167 | 20226 | gi 566161648 | 59.09 | 5 | 1 | 1 |                      | 17801  | glycine cleavage<br>system protein H<br>precursor [Populus<br>trichocarpa]                                            |
| 757  | 19311 | gi 566172679 | 59.02 | 2 | 1 | 1 |                      | 63027  | hypothetical protein<br>POPTR_0005s22250g<br>[Populus trichocarpa]                                                    |
| 1088 | 720   | gi 359476926 | 58.91 | 8 | 1 | 1 | Carbamidomethylation | 18454  | PREDICTED:<br>photosystem I reaction<br>center subunit N<br>chloroplastic [Vitis<br>vinifera]                         |

|      |       |              |       |   |   |   |                      |       |                                                                       |
|------|-------|--------------|-------|---|---|---|----------------------|-------|-----------------------------------------------------------------------|
| 644  | 17927 | gi 566171321 | 58.53 | 9 | 2 | 1 |                      | 33667 | pfkB-type carbohydrate kinase family protein [Populus trichocarpa]    |
| 1220 | 19808 | gi 566160273 | 58.39 | 6 | 1 | 1 | Carbamidomethylation | 17554 | hypothetical protein POPTR_0003s01440g [Populus trichocarpa]          |
| 1135 | 17596 | gi 566171781 | 58.38 | 2 | 2 | 1 |                      | 84742 | hypothetical protein POPTR_0005s16660g [Populus trichocarpa]          |
| 996  | 1894  | gi 359480888 | 58.19 | 4 | 1 | 1 |                      | 39762 | PREDICTED: RNA-binding protein Musashi homolog 2 [Vitis vinifera]     |
| 987  | 1542  | gi 225458237 | 58.18 | 5 | 1 | 1 | Carbamidomethylation | 29571 | PREDICTED: gamma carbonic anhydrase 1 mitochondrial [Vitis vinifera]  |
| 1085 | 61000 | gi 566173396 | 58.02 | 7 | 3 | 2 | Carbamidomethylation | 33622 | hypothetical protein POPTR_0005s26700g [Populus trichocarpa]          |
| 1054 | 19960 | gi 566150184 | 57.97 | 8 | 2 | 2 |                      | 23580 | hypothetical protein POPTR_0001s21460g [Populus trichocarpa]          |
| 1130 | 1156  | gi 225436289 | 57.96 | 4 | 1 | 1 |                      | 43082 | PREDICTED: probable aldo-keto reductase 2 isoform X1 [Vitis vinifera] |
| 1288 | 61290 | gi 224125776 | 57.78 | 7 | 2 | 1 |                      | 23594 | hypothetical protein POPTR_0013s04850g [Populus trichocarpa]          |
| 1267 | 17452 | gi 566147835 | 57.69 | 6 | 1 | 1 |                      | 26392 | hypothetical protein POPTR_0001s07920g partial [Populus trichocarpa]  |
| 1277 | 18363 | gi 566206536 | 57.37 | 4 | 1 | 1 | Carbamidomethylation | 32775 | hypothetical protein POPTR_0015s080101g [Populus trichocarpa]         |

|      |       |              |       |   |   |   |                                     |       |                                                                                  |
|------|-------|--------------|-------|---|---|---|-------------------------------------|-------|----------------------------------------------------------------------------------|
| 1351 | 17777 | gi 566153407 | 57.27 | 6 | 2 | 2 |                                     | 42007 | ferredoxin-NADP reductase family protein [Populus trichocarpa]                   |
| 851  | 2197  | gi 526118093 | 57.09 | 8 | 1 | 1 | Carbamidomethylation                | 22511 | type II peroxiredoxin E [Vitis vinifera]                                         |
| 1081 | 837   | gi 731425891 | 57.08 | 8 | 2 | 2 |                                     | 31554 | PREDICTED: hypersensitive-induced response protein 1 isoform X2 [Vitis vinifera] |
| 914  | 17902 | gi 566176831 | 57.05 | 4 | 3 | 3 |                                     | 85828 | hypothetical protein POPTR_0006s17890g [Populus trichocarpa]                     |
| 837  | 2406  | gi 225434195 | 56.76 | 6 | 2 | 1 | Carbamidomethylation; Oxidation (M) | 37907 | PREDICTED: 2-alkenal reductase (NADP(+)-dependent) [Vitis vinifera]              |
| 976  | 60999 | gi 731403637 | 56.75 | 4 | 3 | 2 |                                     | 88717 | PREDICTED: nudix hydrolase 3 [Vitis vinifera]                                    |
| 1449 | 2180  | gi 225428049 | 56.74 | 7 | 3 | 3 |                                     | 42284 | PREDICTED: glycerate dehydrogenase HPR peroxisomal [Vitis vinifera]              |
| 593  | 2865  | gi 359479995 | 56.72 | 2 | 2 | 1 |                                     | 61649 | PREDICTED: pectinesterase-like [Vitis vinifera]                                  |
| 1063 | 21187 | gi 225452785 | 56.72 | 8 | 2 | 2 |                                     | 29509 | PREDICTED: NAP1-related protein 2 [Vitis vinifera]                               |
| 1309 | 18805 | gi 566162337 | 56.51 | 5 | 1 | 1 |                                     | 26306 | glutathione peroxidase family protein [Populus trichocarpa]                      |
| 617  | 1101  | gi 225434062 | 56.44 | 6 | 2 | 1 |                                     | 28430 | PREDICTED: chitinase 5-like [Vitis vinifera]                                     |

|      |       |              |       |    |   |   |                      |       |                                                                           |
|------|-------|--------------|-------|----|---|---|----------------------|-------|---------------------------------------------------------------------------|
| 817  | 19480 | gi 224112341 | 56.22 | 3  | 1 | 1 |                      | 46306 | latex abundant family protein [Populus trichocarpa]                       |
| 604  | 970   | gi 731413121 | 56.15 | 9  | 1 | 1 |                      | 15960 | PREDICTED: actin-depolymerizing factor 2-like isoform X2 [Vitis vinifera] |
| 1077 | 28951 | gi 566215969 | 56.14 | 4  | 2 | 1 | Carbamidomethylation | 46998 | hypothetical protein POPTR_0018s14920g [Populus trichocarpa]              |
| 959  | 1851  | gi 225439145 | 56.1  | 5  | 2 | 2 |                      | 37191 | PREDICTED: grpE protein homolog mitochondrial isoform X1 [Vitis vinifera] |
| 989  | 17293 | gi 566206565 | 55.74 | 7  | 2 | 2 | Carbamidomethylation | 39138 | hypothetical protein POPTR_0015s08180g [Populus trichocarpa]              |
| 977  | 1688  | gi 359479353 | 55.56 | 18 | 3 | 1 |                      | 21048 | PREDICTED: lactoylglutathione lyase isoform X2 [Vitis vinifera]           |
| 1198 | 17093 | gi 224067984 | 55.31 | 3  | 2 | 2 |                      | 68220 | dynamamin-like protein B [Populus trichocarpa]                            |
| 1361 | 6864  | gi 359475352 | 55.28 | 3  | 1 | 1 |                      | 49145 | PREDICTED: uncharacterized protein At4g06744 [Vitis vinifera]             |
| 1032 | 686   | gi 225429234 | 55.27 | 12 | 3 | 3 |                      | 34319 | PREDICTED: mitochondrial import receptor subunit TOM40-1 [Vitis vinifera] |
| 1270 | 19350 | gi 224073782 | 55.24 | 9  | 1 | 1 | Carbamidomethylation | 21868 | proline-rich family protein [Populus trichocarpa]                         |
| 876  | 487   | gi 225433247 | 55.22 | 26 | 3 | 3 | Carbamidomethylation | 15031 | PREDICTED: 60S ribosomal protein L23 [Vitis vinifera]                     |

|      |       |              |       |    |   |   |                      |        |                                                                                  |
|------|-------|--------------|-------|----|---|---|----------------------|--------|----------------------------------------------------------------------------------|
| 1656 | 18326 | gi 224109088 | 55.22 | 2  | 1 | 1 |                      | 57503  | SUCCINIC SEMIALDEHYDE DEHYDROGENASE family protein [Populus trichocarpa]         |
| 1488 | 19481 | gi 224122412 | 55.08 | 7  | 1 | 1 |                      | 23172  | cytochrome b5 domain-containing family protein [Populus trichocarpa]             |
| 1353 | 2552  | gi 731393274 | 55.02 | 2  | 2 | 2 |                      | 76795  | PREDICTED: uncharacterized protein LOC100253534 isoform X2 [Vitis vinifera]      |
| 650  | 1307  | gi 225463506 | 54.89 | 7  | 2 | 2 |                      | 38294  | PREDICTED: fructose-bisphosphate aldolase cytoplasmic isozyme 1 [Vitis vinifera] |
| 858  | 29364 | gi 359478417 | 54.68 | 3  | 2 | 1 |                      | 58240  | PREDICTED: beta-glucosidase 12-like [Vitis vinifera]                             |
| 1813 | 61026 | gi 731393292 | 54.53 | 2  | 1 | 1 |                      | 72077  | PREDICTED: glucosidase 2 subunit beta isoform X2 [Vitis vinifera]                |
| 1360 | 19030 | gi 566167266 | 54.5  | 4  | 1 | 1 |                      | 37830  | hypothetical protein POPTR_0004s18610g [Populus trichocarpa]                     |
| 860  | 2356  | gi 359497418 | 54.13 | 18 | 2 | 2 |                      | 11555  | PREDICTED: mitochondrial pyruvate carrier 2-like partial [Vitis vinifera]        |
| 846  | 17778 | gi 566199576 | 54.06 | 3  | 3 | 3 | Carbamidomethylation | 123531 | hypothetical protein POPTR_0013s05320g [Populus trichocarpa]                     |

|      |       |              |       |    |   |   |                      |        |                                                                                    |
|------|-------|--------------|-------|----|---|---|----------------------|--------|------------------------------------------------------------------------------------|
| 1306 | 29225 | gi 731410214 | 53.73 | 2  | 1 | 1 |                      | 66761  | PREDICTED: glucose-6-phosphate 1-dehydrogenase chloroplastic-like [Vitis vinifera] |
| 973  | 427   | gi 731399148 | 53.68 | 11 | 1 | 1 |                      | 14802  | PREDICTED: 40S ribosomal protein S15a [Vitis vinifera]                             |
| 1094 | 18241 | gi 566146307 | 53.67 | 4  | 2 | 1 |                      | 66102  | monocopper oxidase precursor family protein [Populus trichocarpa]                  |
| 978  | 463   | gi 731398611 | 53.52 | 6  | 3 | 3 |                      | 43372  | PREDICTED: proliferation-associated protein 2G4 [Vitis vinifera]                   |
| 1098 | 18265 | gi 566189013 | 53.46 | 5  | 1 | 1 |                      | 30317  | glycine-rich family protein [Populus trichocarpa]                                  |
| 1188 | 1772  | gi 225451677 | 53.45 | 1  | 1 | 1 |                      | 108901 | PREDICTED: staphylococcal nuclease domain-containing protein 1 [Vitis vinifera]    |
| 1487 | 5205  | gi 359482448 | 53.4  | 2  | 2 | 2 | Carbamidomethylation | 83440  | PREDICTED: subtilisin-like protease [Vitis vinifera]                               |
| 861  | 18691 | gi 671743260 | 53.36 | 9  | 2 | 2 |                      | 24165  | cytochrome b6 (chloroplast) [Camellia petelotii]                                   |
| 1647 | 17947 | gi 224063787 | 53.32 | 6  | 1 | 1 |                      | 17073  | ribosomal protein S13 [Populus trichocarpa]                                        |
| 1354 | 19087 | gi 566258212 | 53.22 | 7  | 1 | 1 |                      | 24279  | hypothetical protein POPTR_0115s00200g partial [Populus trichocarpa]               |
| 839  | 19582 | gi 224062109 | 53.13 | 3  | 1 | 1 |                      | 38699  | dihydroflavonol reductase family protein [Populus trichocarpa]                     |

|      |       |              |       |    |   |   |                      |       |                                                                                                  |
|------|-------|--------------|-------|----|---|---|----------------------|-------|--------------------------------------------------------------------------------------------------|
| 1682 | 2403  | gi 225470816 | 52.88 | 23 | 1 | 1 |                      | 5428  | PREDICTED: wound-induced basic protein [Vitis vinifera]                                          |
| 1606 | 61058 | gi 225459324 | 52.75 | 3  | 1 | 1 |                      | 31418 | PREDICTED: uncharacterized protein LOC100260886 isoform X2 [Vitis vinifera]                      |
| 1111 | 2871  | gi 225455386 | 52.7  | 3  | 2 | 1 |                      | 65593 | PREDICTED: probable pectinesterase/pectinesterase inhibitor 34 [Vitis vinifera]                  |
| 1174 | 2895  | gi 359490940 | 52.4  | 4  | 2 | 1 | Carbamidomethylation | 48807 | PREDICTED: actin-related protein 4 [Vitis vinifera]                                              |
| 1678 | 362   | gi 225464186 | 52.29 | 4  | 2 | 2 |                      | 49585 | PREDICTED: 26S proteasome regulatory subunit 4 homolog B [Vitis vinifera]                        |
| 1183 | 18756 | gi 566146785 | 52.2  | 3  | 1 | 1 |                      | 43851 | UBIQUITIN-SPECIFIC PROTEASE 20 family protein [Populus trichocarpa]                              |
| 1034 | 16800 | gi 224129102 | 52.19 | 5  | 2 | 2 | Carbamidomethylation | 42388 | hypothetical protein POPTR_0014s15960g [Populus trichocarpa]                                     |
| 1651 | 29056 | gi 224069802 | 52.19 | 5  | 1 | 1 | Carbamidomethylation | 30843 | Ni-binding urease accessory protein UreG [Populus trichocarpa]                                   |
| 1136 | 16899 | gi 566190691 | 52.14 | 3  | 1 | 1 | Carbamidomethylation | 65588 | Ser/Thr specific protein phosphatase 2A A regulatory subunit alpha isoform [Populus trichocarpa] |



|      |       |              |       |    |   |   |                      |       |                                                                                         |
|------|-------|--------------|-------|----|---|---|----------------------|-------|-----------------------------------------------------------------------------------------|
| 679  | 379   | gi 225442192 | 52.13 | 8  | 2 | 2 |                      | 21908 | PREDICTED: 60S ribosomal protein L9 [Vitis vinifera]                                    |
| 1175 | 1946  | gi 225440849 | 52.07 | 19 | 1 | 1 |                      | 8952  | PREDICTED: probable small nuclear ribonucleoprotein G [Vitis vinifera]                  |
| 1593 | 18446 | gi 224064850 | 52    | 8  | 2 | 1 |                      | 28407 | chlorophyll a/b-binding family protein [Populus trichocarpa]                            |
| 1173 | 2259  | gi 225431922 | 51.88 | 19 | 2 | 2 | Carbamidomethylation | 13225 | PREDICTED: DNA-directed RNA polymerases II IV and V subunit 9A [Vitis vinifera]         |
| 958  | 19547 | gi 566190820 | 51.87 | 4  | 4 | 1 |                      | 63045 | hypothetical protein POPTR_0010s14520g [Populus trichocarpa]                            |
| 1913 | 2173  | gi 731434735 | 51.84 | 14 | 1 | 1 | Carbamidomethylation | 10306 | PREDICTED: LOW QUALITY PROTEIN: costars family protein [Vitis vinifera]                 |
| 603  | 1422  | gi 731439999 | 51.54 | 2  | 2 | 1 | Carbamidomethylation | 80675 | PREDICTED: primary amine oxidase-like [Vitis vinifera]                                  |
| 1252 | 17523 | gi 224107106 | 51.53 | 2  | 1 | 1 |                      | 79571 | MULTIFUNCTIONAL family protein [Populus trichocarpa]                                    |
| 1281 | 18074 | gi 566161702 | 51.41 | 8  | 3 | 1 |                      | 30568 | Mitochondrial carnitine/acylcarnitine carrier-like family protein [Populus trichocarpa] |
| 1368 | 1903  | gi 225440898 | 51.37 | 5  | 2 | 2 |                      | 51575 | PREDICTED: cell division protein FtsZ homolog 2-1 chloroplastic [Vitis vinifera]        |

|      |       |              |       |    |   |   |                      |       |                                                                          |
|------|-------|--------------|-------|----|---|---|----------------------|-------|--------------------------------------------------------------------------|
| 678  | 18132 | gi 566151049 | 51.27 | 6  | 2 | 2 |                      | 26982 | hypothetical protein POPTR_0001s26020g [Populus trichocarpa]             |
| 2072 | 61174 | gi 731412260 | 51.15 | 4  | 1 | 1 | Carbamidomethylation | 31064 | PREDICTED: hydroxyacylglutathione hydrolase cytoplasmic [Vitis vinifera] |
| 1371 | 1617  | gi 225429460 | 51.13 | 15 | 2 | 2 |                      | 14040 | PREDICTED: uncharacterized protein LOC100267911 [Vitis vinifera]         |
| 1272 | 419   | gi 731396853 | 51.12 | 12 | 3 | 3 | Carbamidomethylation | 28310 | PREDICTED: 40S ribosomal protein S6 isoform X1 [Vitis vinifera]          |
| 1142 | 18105 | gi 224145917 | 50.92 | 3  | 2 | 2 |                      | 44521 | Uroporphyrinogen decarboxylase family protein [Populus trichocarpa]      |
| 1078 | 18775 | gi 566181200 | 50.9  | 2  | 1 | 1 |                      | 55243 | serine carboxypeptidase S28 family protein [Populus trichocarpa]         |
| 1683 | 1309  | gi 731398937 | 50.63 | 11 | 1 | 1 | Carbamidomethylation | 21183 | PREDICTED: actin-depolymerizing factor 1-like [Vitis vinifera]           |
| 1274 | 17648 | gi 566184227 | 49.94 | 4  | 2 | 2 | Carbamidomethylation | 64966 | pyruvate phosphotransferase family protein [Populus trichocarpa]         |
| 1453 | 18565 | gi 731375306 | 49.83 | 2  | 1 | 1 |                      | 65748 | PREDICTED: delta(24)-sterol reductase [Vitis vinifera]                   |
| 1219 | 928   | gi 225445670 | 49.73 | 6  | 2 | 1 |                      | 24997 | PREDICTED: proteasome subunit beta type-6 [Vitis vinifera]               |

|      |       |              |       |    |   |   |                      |       |                                                                                                                  |
|------|-------|--------------|-------|----|---|---|----------------------|-------|------------------------------------------------------------------------------------------------------------------|
| 1485 | 18748 | gi 566195800 | 49.72 | 5  | 3 | 1 |                      | 48359 | hypothetical protein POPTR_0011s163102g partial [Populus trichocarpa]                                            |
| 794  | 18394 | gi 566200465 | 49.66 | 6  | 1 | 1 |                      | 19556 | hypothetical protein POPTR_0013s10300g partial [Populus trichocarpa]                                             |
| 2028 | 2444  | gi 731438661 | 49.66 | 4  | 1 | 1 |                      | 32525 | PREDICTED: uncharacterized protein LOC104878720 [Vitis vinifera]                                                 |
| 1232 | 623   | gi 731385630 | 49.61 | 3  | 2 | 2 |                      | 99551 | PREDICTED: heat shock 70 kDa protein 17 [Vitis vinifera]                                                         |
| 1684 | 2348  | gi 225463408 | 49.59 | 10 | 1 | 1 |                      | 14802 | PREDICTED: DNA-binding protein DDB_G0278111 [Vitis vinifera]                                                     |
| 1367 | 18956 | gi 566162026 | 49.54 | 9  | 2 | 2 | Carbamidomethylation | 27183 | hypothetical protein POPTR_0003s10720g [Populus trichocarpa]                                                     |
| 862  | 18055 | gi 566207899 | 49.52 | 6  | 1 | 1 |                      | 23136 | hypothetical protein POPTR_0016s00400g [Populus trichocarpa]                                                     |
| 1285 | 61101 | gi 566151634 | 49.46 | 2  | 1 | 1 | Carbamidomethylation | 50974 | hypothetical protein POPTR_0001s29250g [Populus trichocarpa]                                                     |
| 401  | 43802 | gi 224086681 | 49.41 | 2  | 1 | 1 |                      | 50649 | RNA recognition motif-containing family protein [Populus trichocarpa]                                            |
| 1176 | 2477  | gi 731383208 | 49.38 | 4  | 1 | 1 |                      | 29098 | PREDICTED: heterodimeric geranylgeranyl pyrophosphate synthase small subunit chloroplastic-like [Vitis vinifera] |

|      |       |              |       |    |   |   |       |                                                                                                |
|------|-------|--------------|-------|----|---|---|-------|------------------------------------------------------------------------------------------------|
| 1392 | 61182 | gi 224085575 | 49.26 | 5  | 1 | 1 | 28237 | NADH-ubiquinone oxidoreductase 24 kDa subunit family protein [Populus trichocarpa]             |
| 1014 | 18054 | gi 224068558 | 49.22 | 4  | 1 | 1 | 32725 | NUCLEAR ENCODED CLP PROTEASE 1 family protein [Populus trichocarpa]                            |
| 1057 | 18864 | gi 731383454 | 49.04 | 4  | 1 | 1 | 43734 | PREDICTED: probable N-acetyl-gamma-glutamyl-phosphate reductase chloroplastic [Vitis vinifera] |
| 1466 | 964   | gi 225438529 | 48.92 | 11 | 2 | 2 | 27683 | PREDICTED: probable ATP synthase 24 kDa subunit mitochondrial [Vitis vinifera]                 |
| 1160 | 2400  | gi 225434808 | 48.9  | 3  | 1 | 1 | 32777 | PREDICTED: eukaryotic translation initiation factor 3 subunit G-B [Vitis vinifera]             |
| 1024 | 901   | gi 359493854 | 48.84 | 6  | 1 | 1 | 20058 | PREDICTED: thioredoxin M4 chloroplastic [Vitis vinifera]                                       |
| 1112 | 18794 | gi 224066629 | 48.7  | 8  | 1 | 1 | 16281 | thioredoxin family protein [Populus trichocarpa]                                               |
| 1076 | 17434 | gi 566179312 | 48.64 | 3  | 2 | 1 | 92290 | hypothetical protein POPTR_0007s02960g [Populus trichocarpa]                                   |
| 642  | 2533  | gi 359494249 | 48.39 | 4  | 1 | 1 | 21360 | PREDICTED: photosystem I reaction center subunit V chloroplastic [Vitis vinifera]              |

|      |       |              |       |    |   |   |                      |        |                                                                                      |
|------|-------|--------------|-------|----|---|---|----------------------|--------|--------------------------------------------------------------------------------------|
| 889  | 1613  | gi 731375703 | 48.35 | 7  | 2 | 1 | Oxidation (M)        | 35679  | PREDICTED: lignin-forming anionic peroxidase-like [Vitis vinifera]                   |
| 1109 | 946   | gi 225429638 | 48.33 | 10 | 2 | 2 | Carbamidomethylation | 39454  | PREDICTED: omega-amidase chloroplastic [Vitis vinifera]                              |
| 1574 | 471   | gi 225433575 | 48.24 | 2  | 2 | 1 |                      | 105215 | PREDICTED: probable glucan 1 3-alpha-glucosidase [Vitis vinifera]                    |
| 1456 | 61208 | gi 224109620 | 47.84 | 4  | 1 | 1 |                      | 24252  | chalcone isomerase family protein [Populus trichocarpa]                              |
| 1489 | 1120  | gi 225465441 | 47.83 | 12 | 1 | 1 |                      | 14675  | PREDICTED: cytochrome b5 [Vitis vinifera]                                            |
| 1072 | 1842  | gi 225447176 | 47.75 | 6  | 3 | 2 |                      | 46608  | PREDICTED: protein disulfide isomerase-like 2-3 [Vitis vinifera]                     |
| 1650 | 1703  | gi 731376062 | 47.73 | 2  | 1 | 1 | Carbamidomethylation | 83343  | PREDICTED: urease isoform X2 [Vitis vinifera]                                        |
| 946  | 30077 | gi 566214618 | 47.68 | 7  | 1 | 1 | Carbamidomethylation | 13633  | hypothetical protein POPTR_0018s06830g [Populus trichocarpa]                         |
| 1868 | 1616  | gi 225426330 | 47.61 | 5  | 1 | 1 |                      | 34913  | PREDICTED: 26S proteasome non-ATPase regulatory subunit 7 homolog A [Vitis vinifera] |
| 1332 | 18228 | gi 224065629 | 47.55 | 9  | 1 | 1 |                      | 16418  | CP12 domain-containing family protein [Populus trichocarpa]                          |
| 1313 | 2104  | gi 225456602 | 47.53 | 6  | 1 | 1 |                      | 23813  | PREDICTED: germin-like protein subfamily T member 2 [Vitis vinifera]                 |

|      |       |              |       |   |   |   |  |        |                                                                                             |
|------|-------|--------------|-------|---|---|---|--|--------|---------------------------------------------------------------------------------------------|
| 1679 | 18377 | gi 566172753 | 47.41 | 4 | 2 | 2 |  | 55215  | pleckstrin homology domain-containing family protein [Populus trichocarpa]                  |
| 2128 | 61276 | gi 225461673 | 47.37 | 2 | 1 | 1 |  | 68443  | PREDICTED: peptide-N4-(N-acetyl-beta-glucosaminy)asparagine amidase A-like [Vitis vinifera] |
| 1491 | 1626  | gi 359482440 | 47.36 | 2 | 1 | 1 |  | 57853  | PREDICTED: alanine aminotransferase 2 [Vitis vinifera]                                      |
| 1108 | 1268  | gi 225440238 | 47.31 | 6 | 2 | 2 |  | 27191  | PREDICTED: proteasome subunit alpha type-3 [Vitis vinifera]                                 |
| 1435 | 28924 | gi 566179175 | 47.26 | 1 | 1 | 1 |  | 134532 | isoleucyl-tRNA synthetase family protein [Populus trichocarpa]                              |
| 929  | 1104  | gi 731435142 | 47.24 | 2 | 2 | 1 |  | 84036  | PREDICTED: protein ROOT HAIR DEFECTIVE 3 homolog 2 isoform X2 [Vitis vinifera]              |
| 1240 | 763   | gi 225433440 | 47.12 | 5 | 2 | 2 |  | 53869  | PREDICTED: glutathione reductase cytosolic [Vitis vinifera]                                 |
| 1624 | 2000  | gi 731418793 | 47.1  | 2 | 1 | 1 |  | 59155  | PREDICTED: glucose-6-phosphate 1-dehydrogenase cytoplasmic isoform [Vitis vinifera]         |
| 1286 | 20021 | gi 566184796 | 47.03 | 2 | 1 | 1 |  | 58710  | hypothetical protein POPTR_0008s18930g [Populus trichocarpa]                                |

|      |       |              |       |   |   |   |                      |       |                                                                                        |
|------|-------|--------------|-------|---|---|---|----------------------|-------|----------------------------------------------------------------------------------------|
| 1424 | 1387  | gi 225427288 | 46.95 | 4 | 3 | 2 |                      | 68795 | PREDICTED:<br>dynamin-related<br>protein 1E [Vitis<br>vinifera]                        |
| 1250 | 17393 | gi 566151113 | 46.8  | 1 | 1 | 1 |                      | 76209 | hypothetical protein<br>POPTR_0001s26420g<br>[Populus trichocarpa]                     |
| 1165 | 18872 | gi 224103201 | 46.68 | 3 | 2 | 1 |                      | 59749 | C2 domain-containing<br>family protein [Populus<br>trichocarpa]                        |
| 1089 | 5615  | gi 225470242 | 46.66 | 6 | 1 | 1 |                      | 16680 | PREDICTED:<br>uncharacterized protein<br>At5g48480 [Vitis<br>vinifera]                 |
| 1960 | 2091  | gi 225450155 | 46.62 | 4 | 1 | 1 |                      | 26703 | PREDICTED:<br>thylakoid lumenal 19<br>kDa protein<br>chloroplastic [Vitis<br>vinifera] |
| 1645 | 19363 | gi 225460394 | 46.61 | 2 | 2 | 2 |                      | 67755 | PREDICTED: patellin-<br>3 [Vitis vinifera]                                             |
| 852  | 19883 | gi 566189043 | 46.56 | 4 | 1 | 1 | Carbamidomethylation | 36173 | Peroxidase 6 precursor<br>family protein [Populus<br>trichocarpa]                      |
| 1474 | 2099  | gi 225426826 | 46.5  | 4 | 1 | 1 |                      | 36763 | PREDICTED:<br>replication factor C<br>subunit 2 [Vitis<br>vinifera]                    |
| 741  | 351   | gi 225457231 | 46.49 | 3 | 2 | 1 |                      | 56145 | PREDICTED:<br>flavonoid 3'-<br>monooxygenase [Vitis<br>vinifera]                       |
| 638  | 17884 | gi 224066487 | 46.37 | 5 | 1 | 1 |                      | 17636 | hypothetical protein<br>POPTR_0002s05220g<br>[Populus trichocarpa]                     |
| 1331 | 19816 | gi 566197446 | 46.36 | 3 | 1 | 1 |                      | 44436 | hypothetical protein<br>POPTR_0012s08440g<br>[Populus trichocarpa]                     |

|      |       |              |       |    |   |   |                      |       |                                                                                  |
|------|-------|--------------|-------|----|---|---|----------------------|-------|----------------------------------------------------------------------------------|
| 1653 | 18022 | gi 224112819 | 46.35 | 12 | 1 | 1 | Carbamidomethylation | 16047 | actin-depolymerizing factor family protein [Populus trichocarpa]                 |
| 1110 | 33319 | gi 224062595 | 46.32 | 6  | 2 | 2 |                      | 28191 | photosystem II oxygen-evolving complex protein 2 precursor [Populus trichocarpa] |
| 1147 | 18882 | gi 224075096 | 46.25 | 1  | 1 | 1 |                      | 73889 | acyl-coA synthetase family protein [Populus trichocarpa]                         |
| 1269 | 1090  | gi 225465997 | 46.24 | 3  | 1 | 1 |                      | 48382 | PREDICTED: WD-40 repeat-containing protein MSII [Vitis vinifera]                 |
| 1322 | 18255 | gi 566174566 | 46.06 | 5  | 2 | 2 |                      | 68630 | hypothetical protein POPTR_0006s05130g [Populus trichocarpa]                     |
| 1685 | 20127 | gi 225435931 | 45.59 | 7  | 1 | 1 |                      | 13713 | PREDICTED: cysteine proteinase inhibitor A [Vitis vinifera]                      |
| 1605 | 3107  | gi 225450219 | 45.47 | 7  | 2 | 2 |                      | 26900 | PREDICTED: 30S ribosomal protein 2 chloroplastic [Vitis vinifera]                |
| 1490 | 29317 | gi 225426084 | 45.35 | 8  | 1 | 1 |                      | 20541 | PREDICTED: disease resistance response protein 206 [Vitis vinifera]              |
| 937  | 19812 | gi 566163926 | 45.33 | 6  | 1 | 1 |                      | 21587 | hypothetical protein POPTR_0003s21460g [Populus trichocarpa]                     |
| 1148 | 1371  | gi 225469850 | 45.32 | 4  | 1 | 1 |                      | 39160 | PREDICTED: uncharacterized protein DDB_G0288133 [Vitis vinifera]                 |



|      |       |              |       |    |   |   |                      |       |                                                                                          |
|------|-------|--------------|-------|----|---|---|----------------------|-------|------------------------------------------------------------------------------------------|
| 1221 | 2524  | gi 225452110 | 45.16 | 10 | 1 | 1 | Carbamidomethylation | 9858  | PREDICTED: non-specific lipid-transfer protein 2-like [Vitis vinifera]                   |
| 764  | 19565 | gi 566199277 | 45.15 | 4  | 1 | 1 |                      | 38735 | hypothetical protein POPTR_0013s03750g [Populus trichocarpa]                             |
| 925  | 28907 | gi 224097915 | 45.15 | 6  | 2 | 1 |                      | 30342 | plasma membrane intrinsic protein 1-1 [Populus trichocarpa]                              |
| 1492 | 61278 | gi 566214298 | 45.1  | 13 | 1 | 1 |                      | 8219  | hypothetical protein POPTR_0018s05030g partial [Populus trichocarpa]                     |
| 1428 | 1093  | gi 225438067 | 45    | 4  | 1 | 1 |                      | 45402 | PREDICTED: succinyl-CoA ligase [ADP-forming] subunit beta mitochondrial [Vitis vinifera] |
| 1251 | 1139  | gi 359484892 | 44.97 | 3  | 2 | 1 |                      | 86995 | PREDICTED: eukaryotic translation initiation factor isoform 4G-1 [Vitis vinifera]        |
| 1355 | 17276 | gi 566170117 | 44.91 | 3  | 1 | 1 |                      | 48844 | hypothetical protein POPTR_0005s08050g [Populus trichocarpa]                             |
| 1369 | 17911 | gi 566203837 | 44.88 | 5  | 2 | 1 |                      | 39770 | DNAJ heat shock family protein [Populus trichocarpa]                                     |
| 1594 | 2785  | gi 731408402 | 44.88 | 3  | 1 | 1 |                      | 29415 | PREDICTED: (DL)-glycerol-3-phosphatase 2 [Vitis vinifera]                                |
| 2030 | 2203  | gi 731387671 | 44.81 | 4  | 1 | 1 | Carbamidomethylation | 39674 | PREDICTED: thioredoxin reductase NTRB-like [Vitis vinifera]                              |

|      |       |              |       |   |   |   |                      |       |                                                                             |
|------|-------|--------------|-------|---|---|---|----------------------|-------|-----------------------------------------------------------------------------|
| 2031 | 61167 | gi 566187811 | 44.1  | 5 | 1 | 1 | Carbamidomethylation | 16218 | hypothetical protein POPTR_0009s13460g [Populus trichocarpa]                |
| 1096 | 2775  | gi 731436245 | 44.04 | 1 | 1 | 1 |                      | 66120 | PREDICTED: putative laccase-9 [Vitis vinifera]                              |
| 749  | 768   | gi 359483250 | 43.99 | 6 | 2 | 1 |                      | 28691 | PREDICTED: LOW QUALITY PROTEIN: 60S ribosomal protein L7-2 [Vitis vinifera] |
| 1048 | 18261 | gi 224109256 | 43.96 | 6 | 2 | 2 |                      | 29460 | ferritin 2 precursor family protein [Populus trichocarpa]                   |
| 1213 | 19953 | gi 566205586 | 43.92 | 4 | 1 | 1 |                      | 33515 | hypothetical protein POPTR_0015s03360g [Populus trichocarpa]                |
| 1212 | 1811  | gi 225428031 | 43.9  | 4 | 2 | 2 |                      | 45128 | PREDICTED: WD-40 repeat-containing protein MSI3 [Vitis vinifera]            |
| 1620 | 61007 | gi 225452430 | 43.88 | 8 | 2 | 2 |                      | 19663 | PREDICTED: 50S ribosomal protein L12 chloroplastic [Vitis vinifera]         |
| 317  | 19403 | gi 566166342 | 43.87 | 1 | 1 | 1 |                      | 95030 | hypothetical protein POPTR_0004s13420g partial [Populus trichocarpa]        |
| 1372 | 20605 | gi 225467859 | 43.86 | 3 | 1 | 1 | Carbamidomethylation | 33928 | PREDICTED: chlorophyllase-1 [Vitis vinifera]                                |
| 1352 | 17693 | gi 224091819 | 43.68 | 3 | 2 | 1 |                      | 88349 | MIF4G domain-containing family protein [Populus trichocarpa]                |
| 1215 | 17528 | gi 566162704 | 43.62 | 8 | 1 | 1 |                      | 18629 | hypothetical protein POPTR_0003s14870g [Populus trichocarpa]                |

|      |       |              |       |    |   |   |                      |        |                                                                                                     |
|------|-------|--------------|-------|----|---|---|----------------------|--------|-----------------------------------------------------------------------------------------------------|
| 1316 | 17396 | gi 224119992 | 43.61 | 2  | 2 | 2 | Carbamidomethylation | 143158 | hypothetical protein POPTR_0012s13100g [Populus trichocarpa]                                        |
| 1648 | 18006 | gi 224141351 | 43.6  | 2  | 1 | 1 |                      | 68914  | Structure-specific recognition protein 1 [Populus trichocarpa]                                      |
| 1222 | 17990 | gi 224072588 | 43.58 | 3  | 1 | 1 | Carbamidomethylation | 30737  | hypothetical protein POPTR_0003s17100g partial [Populus trichocarpa]                                |
| 1403 | 6489  | gi 225432798 | 43.47 | 3  | 1 | 1 |                      | 38396  | PREDICTED: perakine reductase [Vitis vinifera]                                                      |
| 1102 | 2189  | gi 526118301 | 43.37 | 4  | 1 | 1 |                      | 41463  | cysteine protease precursor [Vitis vinifera]                                                        |
| 1680 | 18830 | gi 566214901 | 43.31 | 5  | 1 | 1 |                      | 35399  | hypothetical protein POPTR_0018s08850g [Populus trichocarpa]                                        |
| 1677 | 61060 | gi 566192679 | 43.29 | 27 | 2 | 2 |                      | 6086   | hypothetical protein POPTR_0010s25170g [Populus trichocarpa]                                        |
| 1686 | 1130  | gi 225464489 | 43.14 | 9  | 1 | 1 |                      | 12497  | PREDICTED: 60S ribosomal protein L36-3 [Vitis vinifera]                                             |
| 1627 | 29810 | gi 566156983 | 43.12 | 18 | 1 | 1 |                      | 8764   | hypothetical protein POPTR_0002s08770g partial [Populus trichocarpa]                                |
| 1493 | 2040  | gi 731428304 | 43.11 | 2  | 1 | 1 |                      | 81014  | PREDICTED: apoptotic chromatin condensation inducer in the nucleus-like isoform X2 [Vitis vinifera] |
| 1082 | 1594  | gi 731439095 | 43.05 | 4  | 1 | 1 | Carbamidomethylation | 31959  | PREDICTED: GLABRA2 expression modulator [Vitis vinifera]                                            |

|      |       |              |       |   |   |   |                      |       |                                                                                  |
|------|-------|--------------|-------|---|---|---|----------------------|-------|----------------------------------------------------------------------------------|
| 972  | 19793 | gi 566181894 | 43.04 | 2 | 1 | 1 |                      | 58001 | hypothetical protein POPTR_0008s02250g [Populus trichocarpa]                     |
| 1287 | 30041 | gi 224066755 | 42.92 | 5 | 1 | 1 |                      | 19335 | thioredoxin m family protein [Populus trichocarpa]                               |
| 1494 | 61284 | gi 224144643 | 42.91 | 4 | 1 | 1 |                      | 40333 | hypothetical protein POPTR_0019s04130g [Populus trichocarpa]                     |
| 1468 | 46566 | gi 224144781 | 42.86 | 9 | 2 | 2 | Carbamidomethylation | 27942 | hypothetical protein POPTR_0019s04910g [Populus trichocarpa]                     |
| 2073 | 18556 | gi 224067088 | 42.78 | 1 | 1 | 1 |                      | 73926 | hypothetical protein POPTR_0002s10850g [Populus trichocarpa]                     |
| 1050 | 2148  | gi 225450543 | 42.77 | 5 | 1 | 1 |                      | 18729 | PREDICTED: uncharacterized protein LOC100245914 [Vitis vinifera]                 |
| 1087 | 18780 | gi 224141359 | 42.66 | 5 | 2 | 2 |                      | 40664 | hypothetical protein POPTR_0017s11530g [Populus trichocarpa]                     |
| 1095 | 2154  | gi 225458519 | 42.65 | 2 | 1 | 1 | Carbamidomethylation | 75018 | PREDICTED: uncharacterized protein LOC100267853 [Vitis vinifera]                 |
| 1450 | 29091 | gi 224120122 | 42.65 | 3 | 1 | 1 | Carbamidomethylation | 39228 | Sorbitol Dehydrogenase family protein [Populus trichocarpa]                      |
| 1339 | 17903 | gi 224128320 | 42.36 | 2 | 1 | 1 |                      | 80920 | PROLIFERA family protein [Populus trichocarpa]                                   |
| 1010 | 2039  | gi 225449198 | 42.25 | 4 | 1 | 1 |                      | 31414 | PREDICTED: eukaryotic translation initiation factor 3 subunit F [Vitis vinifera] |

|      |       |              |       |   |   |   |                      |        |                                                                                    |
|------|-------|--------------|-------|---|---|---|----------------------|--------|------------------------------------------------------------------------------------|
| 1325 | 18093 | gi 566214132 | 42.23 | 1 | 1 | 1 | Carbamidomethylation | 108955 | hypothetical protein POPTR_0018s03980g [Populus trichocarpa]                       |
| 585  | 2150  | gi 225464047 | 42.17 | 5 | 1 | 1 |                      | 22575  | PREDICTED: cysteine proteinase inhibitor 12 [Vitis vinifera]                       |
| 1426 | 29551 | gi 225458850 | 42.04 | 7 | 1 | 1 | Carbamidomethylation | 21998  | PREDICTED: LIM domain-containing protein WLIM1 [Vitis vinifera]                    |
| 1278 | 2026  | gi 359492937 | 41.91 | 2 | 1 | 1 |                      | 46528  | PREDICTED: aspartic proteinase nepenthesin-1 [Vitis vinifera]                      |
| 1103 | 17842 | gi 224057968 | 41.9  | 4 | 1 | 1 |                      | 24349  | photosystem I chain III family protein [Populus trichocarpa]                       |
| 1495 | 2245  | gi 731381456 | 41.87 | 3 | 1 | 1 |                      | 34629  | PREDICTED: translocase of chloroplast 34 chloroplastic isoform X2 [Vitis vinifera] |
| 1113 | 856   | gi 225454422 | 41.85 | 8 | 1 | 1 |                      | 16418  | PREDICTED: eukaryotic translation initiation factor 1A [Vitis vinifera]            |
| 2129 | 36609 | gi 224102065 | 41.79 | 7 | 1 | 1 | Carbamidomethylation | 15668  | hypothetical protein POPTR_0008s15310g [Populus trichocarpa]                       |
| 1357 | 1435  | gi 225464870 | 41.77 | 4 | 1 | 1 | Carbamidomethylation | 37627  | PREDICTED: bifunctional nitrilase/nitrile hydratase NIT4B [Vitis vinifera]         |
| 1243 | 1965  | gi 225459318 | 41.69 | 3 | 1 | 1 |                      | 35188  | PREDICTED: annexin D1 [Vitis vinifera]                                             |
| 1253 | 18018 | gi 224083504 | 41.67 | 2 | 2 | 1 |                      | 105368 | hypothetical protein POPTR_0005s07000g [Populus trichocarpa]                       |

|      |       |              |       |    |   |   |                      |        |                                                                               |
|------|-------|--------------|-------|----|---|---|----------------------|--------|-------------------------------------------------------------------------------|
| 1630 | 18575 | gi 566153712 | 41.59 | 3  | 1 | 1 |                      | 52249  | transport protein sec61 [Populus trichocarpa]                                 |
| 1575 | 1607  | gi 225445166 | 41.55 | 1  | 1 | 1 |                      | 122877 | PREDICTED: uncharacterized protein LOC100262932 [Vitis vinifera]              |
| 1223 | 28940 | gi 566162305 | 41.53 | 2  | 1 | 1 | Carbamidomethylation | 38904  | UDP-glucose 4-epimerase family protein [Populus trichocarpa]                  |
| 2070 | 17520 | gi 224104913 | 41.44 | 14 | 1 | 1 | Carbamidomethylation | 12354  | 60S ribosomal protein L30 [Populus trichocarpa]                               |
| 351  | 18903 | gi 566146533 | 41.43 | 14 | 2 | 2 |                      | 10147  | acyl-CoA-binding family protein [Populus trichocarpa]                         |
| 1524 | 833   | gi 359483831 | 41.42 | 4  | 2 | 1 |                      | 37846  | PREDICTED: dnaJ homolog subfamily B member 13 [Vitis vinifera]                |
| 1689 | 1078  | gi 359495228 | 41.39 | 1  | 1 | 1 |                      | 81899  | PREDICTED: far upstream element-binding protein 1 isoform X2 [Vitis vinifera] |
| 2130 | 813   | gi 225425356 | 41.36 | 5  | 1 | 1 |                      | 32651  | PREDICTED: U2 small nuclear ribonucleoprotein A' [Vitis vinifera]             |
| 1443 | 19496 | gi 224078630 | 41.29 | 2  | 1 | 1 |                      | 62205  | ATP-binding-cassette transporter family protein [Populus trichocarpa]         |
| 1208 | 2512  | gi 359491781 | 41.11 | 6  | 1 | 1 |                      | 18046  | PREDICTED: miraculin-like partial [Vitis vinifera]                            |

|      |       |              |       |   |   |   |                      |        |                                                                              |
|------|-------|--------------|-------|---|---|---|----------------------|--------|------------------------------------------------------------------------------|
| 1370 | 1096  | gi 225445041 | 41.09 | 4 | 2 | 1 |                      | 54472  | PREDICTED: mitochondrial-processing peptidase subunit alpha [Vitis vinifera] |
| 1496 | 1412  | gi 225427234 | 40.96 | 8 | 1 | 1 |                      | 17554  | PREDICTED: glycine cleavage system H protein mitochondrial [Vitis vinifera]  |
| 1289 | 2600  | gi 526117629 | 40.9  | 8 | 1 | 1 | Carbamidomethylation | 11686  | lipid transfer protein precursor [Vitis vinifera]                            |
| 568  | 61045 | gi 566152205 | 40.72 | 0 | 1 | 1 |                      | 298421 | hypothetical protein POPTR_0001s32460g [Populus trichocarpa]                 |
| 2071 | 18658 | gi 224117530 | 40.69 | 6 | 1 | 1 |                      | 21810  | endoribonuclease L-PSP family protein [Populus trichocarpa]                  |
| 2131 | 3535  | gi 225428388 | 40.61 | 3 | 1 | 1 |                      | 40284  | PREDICTED: COP9 signalosome complex subunit 5b-like [Vitis vinifera]         |
| 1206 | 18993 | gi 566235447 | 40.59 | 3 | 1 | 1 | Carbamidomethylation | 30476  | hypothetical protein POPTR_0019s08170g partial [Populus trichocarpa]         |
| 718  | 18947 | gi 566178547 | 40.49 | 3 | 1 | 1 |                      | 25381  | hypothetical protein POPTR_0006s28120g [Populus trichocarpa]                 |
| 1275 | 17994 | gi 566158382 | 40.46 | 3 | 2 | 2 |                      | 77765  | hypothetical protein POPTR_0002s16570g [Populus trichocarpa]                 |
| 1358 | 19982 | gi 566197668 | 40.31 | 6 | 1 | 1 |                      | 18634  | hypothetical protein POPTR_0012s09690g partial [Populus trichocarpa]         |
| 1550 | 1377  | gi 225452877 | 40.03 | 3 | 1 | 1 |                      | 57074  | PREDICTED: cystathionine gamma-synthase chloroplastic [Vitis vinifera]       |

|      |       |              |       |   |   |   |                      |       |                                                                                  |
|------|-------|--------------|-------|---|---|---|----------------------|-------|----------------------------------------------------------------------------------|
| 1291 | 61448 | gi 225453275 | 39.98 | 4 | 1 | 1 | Carbamidomethylation | 14633 | PREDICTED: 20 kDa chaperonin chloroplastic [Vitis vinifera]                      |
| 1070 | 1200  | gi 225452053 | 39.96 | 8 | 2 | 1 |                      | 21963 | PREDICTED: 40S ribosomal protein S7 [Vitis vinifera]                             |
| 1330 | 18541 | gi 224103381 | 39.85 | 2 | 1 | 1 |                      | 53021 | diaminopimelate decarboxylase family protein [Populus trichocarpa]               |
| 1687 | 29854 | gi 224130644 | 39.73 | 6 | 1 | 1 |                      | 21941 | GRF1-INTERACTING FACTOR 2 family protein [Populus trichocarpa]                   |
| 2132 | 1340  | gi 225442595 | 39.72 | 2 | 1 | 1 |                      | 60200 | PREDICTED: protein disulfide isomerase-like 1-6 [Vitis vinifera]                 |
| 1373 | 19921 | gi 566210424 | 39.71 | 3 | 1 | 1 |                      | 35704 | hypothetical protein POPTR_0017s00350g [Populus trichocarpa]                     |
| 1470 | 61034 | gi 566183937 | 39.55 | 3 | 1 | 1 |                      | 36660 | hypothetical protein POPTR_0008s14270g [Populus trichocarpa]                     |
| 1020 | 18464 | gi 224116582 | 39.51 | 1 | 1 | 1 |                      | 50722 | 2-oxoacid dehydrogenase family protein [Populus trichocarpa]                     |
| 676  | 2504  | gi 731416298 | 39.49 | 4 | 1 | 1 |                      | 25123 | PREDICTED: eukaryotic translation initiation factor 3 subunit J [Vitis vinifera] |
| 1320 | 1981  | gi 731400731 | 39.47 | 2 | 1 | 1 |                      | 35100 | PREDICTED: histone deacetylase HDT1 [Vitis vinifera]                             |
| 1389 | 17767 | gi 566157737 | 39.45 | 2 | 1 | 1 |                      | 79950 | hypothetical protein POPTR_0002s13010g [Populus trichocarpa]                     |



|      |       |              |       |   |   |   |                      |       |                                                                         |
|------|-------|--------------|-------|---|---|---|----------------------|-------|-------------------------------------------------------------------------|
| 1476 | 19947 | gi 224084924 | 39.4  | 4 | 1 | 1 | Carbamidomethylation | 22828 | Proteasome subunit beta type 3-2 family protein [Populus trichocarpa]   |
| 1497 | 18555 | gi 566167707 | 39.36 | 4 | 1 | 1 |                      | 29259 | alcohol dehydroge family protein [Populus trichocarpa]                  |
| 1374 | 19544 | gi 566164408 | 39.08 | 2 | 1 | 1 |                      | 45443 | RNA-binding protein 45 [Populus trichocarpa]                            |
| 2032 | 29683 | gi 566197448 | 39.01 | 9 | 1 | 1 | Carbamidomethylation | 12293 | hypothetical protein POPTR_0012s08450g [Populus trichocarpa]            |
| 1652 | 22114 | gi 566162647 | 38.9  | 2 | 1 | 1 |                      | 37095 | hypothetical protein POPTR_0003s14560g [Populus trichocarpa]            |
| 2135 | 19820 | gi 566210973 | 38.89 | 6 | 1 | 1 |                      | 15927 | hypothetical protein POPTR_0017s02810g [Populus trichocarpa]            |
| 167  | 61202 | gi 566152126 | 38.65 | 2 | 1 | 1 |                      | 51807 | hypothetical protein POPTR_0001s31980g [Populus trichocarpa]            |
| 2133 | 19336 | gi 225444159 | 38.47 | 5 | 1 | 1 |                      | 32002 | PREDICTED: coatomer subunit epsilon-1 [Vitis vinifera]                  |
| 2134 | 2169  | gi 731371107 | 38.47 | 1 | 1 | 1 |                      | 89995 | PREDICTED: probable splicing factor 3A subunit 1 [Vitis vinifera]       |
| 1473 | 61161 | gi 566152274 | 38.15 | 6 | 1 | 1 |                      | 14728 | hypothetical protein POPTR_0001s32720g [Populus trichocarpa]            |
| 1406 | 61018 | gi 359496591 | 38.02 | 5 | 2 | 2 |                      | 35516 | PREDICTED: bifunctional epoxide hydrolase 2 isoform X1 [Vitis vinifera] |

|      |       |              |       |    |   |   |                      |        |                                                                                  |
|------|-------|--------------|-------|----|---|---|----------------------|--------|----------------------------------------------------------------------------------|
| 1149 | 17737 | gi 224096586 | 37.86 | 4  | 1 | 1 |                      | 45989  | eukaryotic translation initiation factor 4A family protein [Populus trichocarpa] |
| 1006 | 2032  | gi 359474652 | 37.61 | 2  | 1 | 1 |                      | 50670  | PREDICTED: scopoletin glucosyltransferase-like [Vitis vinifera]                  |
| 1499 | 1321  | gi 225424750 | 37.51 | 7  | 1 | 1 | Carbamidomethylation | 11841  | PREDICTED: gibberellin-regulated protein 11 [Vitis vinifera]                     |
| 865  | 43789 | gi 671743335 | 37.41 | 21 | 1 | 1 |                      | 4424   | photosystem II cytochrome b559 beta subunit (chloroplast) [Camellia pubicosta]   |
| 1413 | 19146 | gi 566160209 | 37.3  | 2  | 1 | 1 | Carbamidomethylation | 54758  | hypothetical protein POPTR_0003s011001g partial [Populus trichocarpa]            |
| 1688 | 18988 | gi 224072767 | 37.23 | 4  | 1 | 1 |                      | 29070  | hypothetical protein POPTR_0003s18420g [Populus trichocarpa]                     |
| 1498 | 20007 | gi 225454373 | 37.08 | 4  | 1 | 1 |                      | 29156  | PREDICTED: 50S ribosomal protein L5 chloroplastic [Vitis vinifera]               |
| 1753 | 17013 | gi 566164286 | 37.03 | 2  | 1 | 1 |                      | 44313  | T-protein of the glycine decarboxylase complex [Populus trichocarpa]             |
| 1869 | 1134  | gi 225423779 | 37.01 | 1  | 1 | 1 |                      | 109803 | PREDICTED: alanine--tRNA ligase [Vitis vinifera]                                 |
| 1722 | 3862  | gi 731416275 | 36.68 | 2  | 1 | 1 |                      | 71591  | PREDICTED: mitochondrial Rho GTPase 1 [Vitis vinifera]                           |

|      |       |              |       |    |   |   |                      |       |                                                                                   |
|------|-------|--------------|-------|----|---|---|----------------------|-------|-----------------------------------------------------------------------------------|
| 1341 | 18358 | gi 566203933 | 36.49 | 10 | 1 | 1 |                      | 13893 | 60S ribosomal protein L22-1 [Populus trichocarpa]                                 |
| 1451 | 20125 | gi 566183496 | 36.48 | 2  | 1 | 1 | Carbamidomethylation | 36732 | hypothetical protein POPTR_0008s11690g partial [Populus trichocarpa]              |
| 1623 | 19559 | gi 566213202 | 36.38 | 8  | 1 | 1 |                      | 12683 | hypothetical protein POPTR_0017s13710g [Populus trichocarpa]                      |
| 1228 | 2027  | gi 225428747 | 36.26 | 3  | 1 | 1 |                      | 33152 | PREDICTED: 2-hydroxyisoflavanone dehydratase [Vitis vinifera]                     |
| 1209 | 43827 | gi 731410026 | 36.07 | 3  | 1 | 1 |                      | 33957 | PREDICTED: protein THYLAKOID FORMATION1 chloroplastic isoform X2 [Vitis vinifera] |
| 1911 | 29347 | gi 566150318 | 35.68 | 3  | 1 | 1 |                      | 44042 | strictosidine synthase family protein [Populus trichocarpa]                       |
| 947  | 61324 | gi 731386196 | 35.65 | 3  | 1 | 1 |                      | 28590 | PREDICTED: protein ASPARTIC PROTEASE IN GUARD CELL 1-like [Vitis vinifera]        |
| 1646 | 30104 | gi 731427528 | 35.6  | 2  | 1 | 1 |                      | 35075 | PREDICTED: putative DNA-binding protein ESCAROLA [Vitis vinifera]                 |
| 1262 | 2695  | gi 731421487 | 35.57 | 3  | 1 | 1 |                      | 35236 | PREDICTED: uncharacterized protein LOC100265498 [Vitis vinifera]                  |
| 1356 | 19834 | gi 224082594 | 35.4  | 6  | 1 | 1 |                      | 19313 | photosystem 2 family protein [Populus trichocarpa]                                |

|      |       |              |       |    |   |   |                      |        |                                                                                     |
|------|-------|--------------|-------|----|---|---|----------------------|--------|-------------------------------------------------------------------------------------|
| 1565 | 797   | gi 225433894 | 35.08 | 1  | 1 | 1 |                      | 246915 | PREDICTED: U5 small nuclear ribonucleoprotein 200 kDa helicase [Vitis vinifera]     |
| 1455 | 29791 | gi 224140057 | 35.07 | 3  | 1 | 1 |                      | 29642  | alcohol dehydrogenase family protein [Populus trichocarpa]                          |
| 1224 | 30061 | gi 566197758 | 35    | 10 | 1 | 1 |                      | 11735  | hypothetical protein POPTR_0012s10210g partial [Populus trichocarpa]                |
| 2074 | 2670  | gi 225439378 | 34.85 | 4  | 1 | 1 | Carbamidomethylation | 24311  | PREDICTED: rano-binding protein 1 homolog a [Vitis vinifera]                        |
| 942  | 61222 | gi 224059600 | 34.77 | 2  | 1 | 1 |                      | 40957  | hypothetical protein POPTR_0001s26960g [Populus trichocarpa]                        |
| 1407 | 445   | gi 225454087 | 34.68 | 1  | 1 | 1 |                      | 66696  | PREDICTED: NAD-dependent malic enzyme 59 kDa isoform mitochondrial [Vitis vinifera] |
| 1214 | 1666  | gi 526117699 | 34.64 | 2  | 1 | 1 |                      | 49406  | 3-dehydroquinate synthase-like [Vitis vinifera]                                     |
| 1681 | 19370 | gi 566181287 | 34.58 | 5  | 1 | 1 | Carbamidomethylation | 58258  | hypothetical protein POPTR_0007s14380g [Populus trichocarpa]                        |
| 804  | 18014 | gi 566177270 | 34.52 | 1  | 1 | 1 |                      | 108292 | elongation factor Tu family protein [Populus trichocarpa]                           |
| 838  | 1097  | gi 731384037 | 34.38 | 2  | 1 | 1 |                      | 37513  | PREDICTED: proline iminopeptidase isoform X2 [Vitis vinifera]                       |

|      |       |              |       |   |   |   |       |                                                                                                                                  |
|------|-------|--------------|-------|---|---|---|-------|----------------------------------------------------------------------------------------------------------------------------------|
| 1655 | 28969 | gi 225468850 | 34.35 | 4 | 1 | 1 | 30830 | PREDICTED:<br>glyoxylate/succinic<br>semialdehyde reductase<br>1 [Vitis vinifera]                                                |
| 844  | 18582 | gi 566156002 | 34.25 | 2 | 1 | 1 | 37272 | hypothetical protein<br>POPTR_0002s03260g<br>[Populus trichocarpa]                                                               |
| 903  | 19106 | gi 224078826 | 34.09 | 4 | 1 | 1 | 24905 | Oxygen-evolving<br>enhancer protein 3-1<br>[Populus trichocarpa]                                                                 |
| 1452 | 23632 | gi 566210204 | 34.07 | 2 | 1 | 1 | 34838 | peroxidase family<br>protein [Populus<br>trichocarpa]                                                                            |
| 663  | 2666  | gi 225449032 | 34.03 | 2 | 1 | 1 | 52590 | PREDICTED:<br>dolichyl-<br>diphosphooligosacchari<br>de--protein<br>glycosyltransferase<br>subunit 1B [Vitis<br>vinifera]        |
| 1340 | 723   | gi 731370529 | 34.02 | 2 | 1 | 1 | 66006 | PREDICTED:<br>serine/threonine-protein<br>phosphatase 2A 65 kDa<br>regulatory subunit A<br>beta isoform-like [Vitis<br>vinifera] |
| 652  | 1077  | gi 225448675 | 33.97 | 3 | 1 | 1 | 23332 | PREDICTED: probable<br>chalcone--flavonone<br>isomerase 3 [Vitis<br>vinifera]                                                    |
| 1657 | 2473  | gi 225465847 | 33.9  | 8 | 1 | 1 | 21605 | PREDICTED:<br>NADPH:quinone<br>oxidoreductase [Vitis<br>vinifera]                                                                |
| 1201 | 1733  | gi 225429462 | 33.65 | 1 | 1 | 1 | 71749 | PREDICTED: far<br>upstream element-<br>binding protein 2 [Vitis<br>vinifera]                                                     |

|      |       |              |       |   |   |   |       |                                                                                           |
|------|-------|--------------|-------|---|---|---|-------|-------------------------------------------------------------------------------------------|
| 1454 | 17669 | gi 566185352 | 33.63 | 1 | 1 | 1 | 79054 | hypothetical protein POPTR_0008s22410g [Populus trichocarpa]                              |
| 1475 | 61183 | gi 731438465 | 33.58 | 3 | 1 | 1 | 26979 | PREDICTED: 3-isopropylmalate dehydratase small subunit 3 [Vitis vinifera]                 |
| 1658 | 28945 | gi 225445462 | 33.56 | 7 | 1 | 1 | 14555 | PREDICTED: uncharacterized protein At2g34160 [Vitis vinifera]                             |
| 2029 | 7372  | gi 225441521 | 33.36 | 4 | 1 | 1 | 18805 | PREDICTED: 60S ribosomal protein L21-1 [Vitis vinifera]                                   |
| 1649 | 1809  | gi 225445005 | 33.32 | 7 | 1 | 1 | 13980 | PREDICTED: 60S ribosomal protein L31 [Vitis vinifera]                                     |
| 1437 | 17582 | gi 566179618 | 33    | 2 | 1 | 1 | 48055 | hypothetical protein POPTR_0007s04700g [Populus trichocarpa]                              |
| 1629 | 1384  | gi 225437898 | 32.79 | 6 | 1 | 1 | 15168 | PREDICTED: photosystem I reaction center subunit IV B chloroplastic-like [Vitis vinifera] |
| 1500 | 19090 | gi 566204168 | 32.3  | 3 | 1 | 1 | 56223 | Citrate synthase family protein [Populus trichocarpa]                                     |
| 1654 | 29587 | gi 731417548 | 32.22 | 2 | 1 | 1 | 37774 | PREDICTED: pyridoxal kinase isoform X8 [Vitis vinifera]                                   |
| 1723 | 5132  | gi 225442452 | 32.17 | 3 | 1 | 1 | 54242 | PREDICTED: hexokinase-2 [Vitis vinifera]                                                  |

|      |       |              |       |    |   |   |                      |        |                                                                                           |
|------|-------|--------------|-------|----|---|---|----------------------|--------|-------------------------------------------------------------------------------------------|
| 1268 | 1444  | gi 731435761 | 32.16 | 1  | 1 | 1 |                      | 160776 | PREDICTED: putative disease resistance RPP13-like protein 1 isoform X1 [Vitis vinifera]   |
| 625  | 20939 | gi 566209297 | 32.09 | 1  | 1 | 1 |                      | 101212 | hypothetical protein POPTR_0016s08100g [Populus trichocarpa]                              |
| 1362 | 1964  | gi 731433023 | 32.08 | 5  | 1 | 1 | Carbamidomethylation | 39210  | PREDICTED: GDSL esterase/lipase At4g26790 [Vitis vinifera]                                |
| 2136 | 2310  | gi 225427364 | 32.03 | 3  | 1 | 1 | Carbamidomethylation | 51132  | PREDICTED: poly(U)-specific endoribonuclease-B [Vitis vinifera]                           |
| 1097 | 20307 | gi 566167359 | 32.03 | 4  | 1 | 1 |                      | 15952  | hypothetical protein POPTR_0004s19310g [Populus trichocarpa]                              |
| 1375 | 950   | gi 225440362 | 32.01 | 12 | 1 | 1 | Oxidation (M)        | 10797  | PREDICTED: mitochondrial import inner membrane translocase subunit Tim9 [Vitis vinifera]  |
| 1501 | 20744 | gi 566189812 | 31.8  | 2  | 1 | 1 | Carbamidomethylation | 50971  | N-carbamyl-L-amino acid hydrolase family protein [Populus trichocarpa]                    |
| 1326 | 1541  | gi 225453754 | 31.43 | 15 | 2 | 2 |                      | 23373  | PREDICTED: probable xyloglucan endotransglucosylase/hydrolase protein 19 [Vitis vinifera] |
| 1290 | 20079 | gi 566163874 | 31.4  | 2  | 1 | 1 |                      | 47484  | hypothetical protein POPTR_0003s21170g [Populus trichocarpa]                              |
| 1139 | 20266 | gi 224130034 | 30.83 | 2  | 1 | 1 |                      | 43250  | Fasciclin-like arabinogalactan protein 8 precursor [Populus trichocarpa]                  |

|      |       |              |       |    |   |   |                      |        |                                                                             |
|------|-------|--------------|-------|----|---|---|----------------------|--------|-----------------------------------------------------------------------------|
| 1690 | 61365 | gi 566201869 | 30.79 | 3  | 1 | 1 |                      | 29322  | hypothetical protein POPTR_0014s01660g [Populus trichocarpa]                |
| 826  | 1128  | gi 731418015 | 30.71 | 2  | 1 | 1 |                      | 53972  | PREDICTED: tryptophan synthase beta chain 1 [Vitis vinifera]                |
| 1608 | 6691  | gi 225437318 | 30.51 | 1  | 1 | 1 |                      | 157286 | PREDICTED: translocase of chloroplast 159 chloroplastic [Vitis vinifera]    |
| 1503 | 61391 | gi 731394556 | 30.05 | 7  | 1 | 1 |                      | 12133  | PREDICTED: uncharacterized protein At2g27730 mitochondrial [Vitis vinifera] |
| 1376 | 61371 | gi 566197290 | 30.02 | 11 | 1 | 1 | Carbamidomethylation | 9151   | hypothetical protein POPTR_0012s07660g [Populus trichocarpa]                |
| 1502 | 3083  | gi 225443150 | 29.89 | 11 | 1 | 1 |                      | 9286   | PREDICTED: uncharacterized protein LOC100262209 [Vitis vinifera]            |
| 1691 | 18205 | gi 224054120 | 29.87 | 2  | 1 | 1 |                      | 73852  | lecithin:cholesterol acyltransferase family protein [Populus trichocarpa]   |
| 1083 | 29783 | gi 566151677 | 29.86 | 2  | 1 | 1 |                      | 44246  | hypothetical protein POPTR_0001s29460g [Populus trichocarpa]                |
| 1504 | 1908  | gi 225424859 | 28.98 | 4  | 1 | 1 |                      | 25630  | PREDICTED: glutathione S-transferase U17 [Vitis vinifera]                   |
| 2138 | 17647 | gi 566195150 | 28.97 | 4  | 1 | 1 |                      | 25143  | hypothetical protein POPTR_0011s12680g [Populus trichocarpa]                |



|      |       |              |       |    |   |   |                      |        |                                                                                  |
|------|-------|--------------|-------|----|---|---|----------------------|--------|----------------------------------------------------------------------------------|
| 1626 | 819   | gi 731423558 | 28.94 | 1  | 1 | 1 |                      | 120839 | PREDICTED: valine--tRNA ligase isoform X2 [Vitis vinifera]                       |
| 1505 | 1351  | gi 225464146 | 28.63 | 4  | 1 | 1 |                      | 32622  | PREDICTED: protein transport protein SEC13 homolog B [Vitis vinifera]            |
| 2075 | 17815 | gi 566187112 | 28.39 | 2  | 1 | 1 |                      | 38128  | WD-40 repeat family protein [Populus trichocarpa]                                |
| 1506 | 61403 | gi 224107797 | 28.33 | 3  | 1 | 1 |                      | 48955  | clathrin adaptor complexes medium subunit family protein [Populus trichocarpa]   |
| 1457 | 5138  | gi 731404421 | 28.15 | 3  | 1 | 1 | Carbamidomethylation | 51194  | PREDICTED: monothiol glutaredoxin-S17 isoform X2 [Vitis vinifera]                |
| 1607 | 938   | gi 225450669 | 28.07 | 1  | 1 | 1 |                      | 113734 | PREDICTED: eukaryotic translation initiation factor 3 subunit A [Vitis vinifera] |
| 2139 | 2547  | gi 731422864 | 27.82 | 15 | 1 | 1 | Carbamidomethylation | 8948   | PREDICTED: probable isoaspartyl peptidase/L-asparaginase 3 [Vitis vinifera]      |
| 825  | 997   | gi 731422162 | 27.72 | 2  | 1 | 1 |                      | 44588  | PREDICTED: glutamate dehydrogenase isoform X1 [Vitis vinifera]                   |
| 1659 | 61411 | gi 566162940 | 27.52 | 3  | 1 | 1 |                      | 30690  | Ubiquitin thiolesterase otubain-like family protein [Populus trichocarpa]        |

|      |       |              |       |    |   |   |                      |        |                                                                                       |
|------|-------|--------------|-------|----|---|---|----------------------|--------|---------------------------------------------------------------------------------------|
| 1917 | 2158  | gi 731427572 | 27.44 | 3  | 1 | 1 | Carbamidomethylation | 31645  | PREDICTED: splicing factor U2af small subunit B [Vitis vinifera]                      |
| 1114 | 1310  | gi 731401385 | 27.43 | 3  | 1 | 1 |                      | 36064  | PREDICTED: uncharacterized protein At5g02240 [Vitis vinifera]                         |
| 1625 | 61109 | gi 731411017 | 27.37 | 1  | 1 | 1 |                      | 146120 | PREDICTED: putative disease resistance RPP13-like protein 1 [Vitis vinifera]          |
| 2141 | 1567  | gi 225433215 | 27.27 | 3  | 1 | 1 | Carbamidomethylation | 26277  | PREDICTED: DAG protein chloroplastic [Vitis vinifera]                                 |
| 1692 | 18812 | gi 671741947 | 27.26 | 11 | 1 | 1 |                      | 9397   | photosystem II cytochrome b559 alpha subunit (chloroplast) [Camellia grandibracteata] |
| 1693 | 61430 | gi 224059134 | 27    | 5  | 1 | 1 |                      | 35532  | mitotic phosphoprotein N' end [Populus trichocarpa]                                   |
| 1695 | 758   | gi 225430549 | 27    | 1  | 1 | 1 |                      | 82761  | PREDICTED: eukaryotic translation initiation factor 3 subunit B [Vitis vinifera]      |
| 1694 | 2500  | gi 526117641 | 26.55 | 4  | 1 | 1 |                      | 21825  | type II peroxiredoxin F [Vitis vinifera]                                              |
| 1211 | 3386  | gi 731395454 | 26.46 | 3  | 1 | 1 |                      | 19689  | PREDICTED: uncharacterized protein OsI_027940 isoform X2 [Vitis vinifera]             |
| 1661 | 61433 | gi 566168430 | 26.38 | 3  | 1 | 1 |                      | 35849  | hypothetical protein POPTR_0004s24220g [Populus trichocarpa]                          |

|      |       |              |       |   |   |   |                      |        |                                                                                                |
|------|-------|--------------|-------|---|---|---|----------------------|--------|------------------------------------------------------------------------------------------------|
| 1216 | 28967 | gi 566209280 | 26.35 | 2 | 1 | 1 |                      | 52718  | hypothetical protein POPTR_0016s08010g [Populus trichocarpa]                                   |
| 895  | 20365 | gi 566172986 | 25.94 | 2 | 1 | 1 |                      | 29701  | Histone H1 family protein [Populus trichocarpa]                                                |
| 1816 | 29461 | gi 566170004 | 25.92 | 2 | 1 | 1 | Carbamidomethylation | 38544  | hypothetical protein POPTR_0005s07370g [Populus trichocarpa]                                   |
| 1814 | 43899 | gi 731420144 | 25.54 | 1 | 1 | 1 |                      | 71058  | PREDICTED: putative disease resistance RPP13-like protein 3 [Vitis vinifera]                   |
| 1915 | 745   | gi 731406154 | 25.18 | 1 | 1 | 1 |                      | 199529 | PREDICTED: brefeldin A-inhibited guanine nucleotide-exchange protein 5 [Vitis vinifera]        |
| 1507 | 32124 | gi 566179420 | 25.06 | 9 | 1 | 1 |                      | 10192  | hypothetical protein POPTR_0007s03510g [Populus trichocarpa]                                   |
| 1417 | 1320  | gi 731440862 | 24.88 | 8 | 1 | 1 |                      | 15642  | PREDICTED: 60S ribosomal protein L32-1 [Vitis vinifera]                                        |
| 1399 | 2681  | gi 225455153 | 24.88 | 4 | 1 | 1 |                      | 26938  | PREDICTED: mitochondrial import inner membrane translocase subunit TIM22-like [Vitis vinifera] |
| 1478 | 61490 | gi 225443482 | 24.75 | 2 | 1 | 1 |                      | 51597  | PREDICTED: shikimate O-hydroxycinnamoyltransferase [Vitis vinifera]                            |
| 1660 | 2120  | gi 731389062 | 24.63 | 3 | 1 | 1 |                      | 25568  | PREDICTED: endo-1,3;1,4-beta-D-glucanase-like [Vitis vinifera]                                 |

|      |       |              |       |   |   |   |       |                                                                                   |
|------|-------|--------------|-------|---|---|---|-------|-----------------------------------------------------------------------------------|
| 1743 | 17036 | gi 224063997 | 24.33 | 2 | 1 | 1 | 67268 | NAD-dependent malic enzyme family protein [Populus trichocarpa]                   |
| 1150 | 3189  | gi 359494267 | 24.22 | 3 | 1 | 1 | 25766 | PREDICTED: probable glutathione S-transferase [Vitis vinifera]                    |
| 1662 | 61514 | gi 225453289 | 23.91 | 4 | 1 | 1 | 21798 | PREDICTED: ATP synthase subunit delta' mitochondrial [Vitis vinifera]             |
| 2145 | 3223  | gi 359493124 | 23.8  | 4 | 1 | 1 | 23188 | PREDICTED: abscisic stress-ripening protein 2 [Vitis vinifera]                    |
| 1225 | 1695  | gi 731408423 | 23.11 | 2 | 1 | 1 | 43098 | PREDICTED: serine carboxypeptidase-like 18 isoform X4 [Vitis vinifera]            |
| 1792 | 18448 | gi 566208224 | 23.08 | 2 | 1 | 1 | 98331 | hypothetical protein POPTR_0016s02100g [Populus trichocarpa]                      |
| 2147 | 19918 | gi 731420480 | 23.07 | 2 | 1 | 1 | 38718 | PREDICTED: plasminogen activator inhibitor 1 RNA-binding protein [Vitis vinifera] |
| 1402 | 2034  | gi 731399524 | 22.5  | 2 | 1 | 1 | 58565 | PREDICTED: 70 kDa peptidyl-prolyl isomerase-like [Vitis vinifera]                 |
| 1696 | 20644 | gi 566185390 | 22.48 | 5 | 1 | 1 | 32450 | hypothetical protein POPTR_0008s22600g [Populus trichocarpa]                      |
| 1379 | 1670  | gi 225436339 | 22.4  | 2 | 1 | 1 | 45109 | PREDICTED: arogenate dehydratase 3 chloroplastic [Vitis vinifera]                 |

|      |       |              |       |   |   |   |                      |        |                                                                                       |
|------|-------|--------------|-------|---|---|---|----------------------|--------|---------------------------------------------------------------------------------------|
| 2151 | 6509  | gi 731426219 | 22.02 | 2 | 1 | 1 |                      | 39322  | PREDICTED: peptidyl-prolyl cis-trans isomerase CYP26-2 chloroplastic [Vitis vinifera] |
| 1334 | 3166  | gi 225464653 | 22    | 1 | 1 | 1 |                      | 51852  | PREDICTED: UDP-glycosyltransferase 88A1-like [Vitis vinifera]                         |
| 2149 | 20529 | gi 566149485 | 22    | 4 | 1 | 1 |                      | 21742  | germin-like family protein [Populus trichocarpa]                                      |
| 1697 | 33635 | gi 225441979 | 21.86 | 1 | 1 | 1 |                      | 63296  | PREDICTED: pectinesterase 3 [Vitis vinifera]                                          |
| 1635 | 61530 | gi 566256423 | 21.84 | 2 | 1 | 1 |                      | 40507  | hypothetical protein POPTR_0306s00210g [Populus trichocarpa]                          |
| 1429 | 46181 | gi 566175847 | 21.68 | 1 | 1 | 1 |                      | 165976 | hypothetical protein POPTR_0006s12120g partial [Populus trichocarpa]                  |
| 2082 | 607   | gi 225431169 | 21.55 | 3 | 1 | 1 |                      | 28116  | PREDICTED: 60S ribosomal protein L8 [Vitis vinifera]                                  |
| 1202 | 3347  | gi 526117481 | 21.49 | 4 | 1 | 1 |                      | 25140  | chalcone--flavonone isomerase 2 [Vitis vinifera]                                      |
| 2084 | 61649 | gi 566167089 | 21.47 | 2 | 1 | 1 | Carbamidomethylation | 54241  | amidase family protein [Populus trichocarpa]                                          |
| 2079 | 17389 | gi 566168468 | 21.44 | 3 | 1 | 1 | Carbamidomethylation | 68078  | RNase L inhibitor family protein [Populus trichocarpa]                                |
| 2035 | 61367 | gi 566163422 | 21.42 | 3 | 1 | 1 |                      | 34848  | hypothetical protein POPTR_0003s18750g [Populus trichocarpa]                          |
| 1363 | 20075 | gi 224092174 | 21.36 | 4 | 1 | 1 |                      | 36141  | hypothetical protein POPTR_0006s24360g [Populus trichocarpa]                          |

|      |       |              |       |   |   |   |               |        |                                                                                                            |
|------|-------|--------------|-------|---|---|---|---------------|--------|------------------------------------------------------------------------------------------------------------|
| 1387 | 25433 | gi 566207901 | 21.16 | 1 | 1 | 1 |               | 90345  | hypothetical protein POPTR_0016s00410g [Populus trichocarpa]                                               |
| 1415 | 29159 | gi 566185166 | 21.15 | 2 | 1 | 1 |               | 63357  | hypothetical protein POPTR_0008s21080g [Populus trichocarpa]                                               |
| 1870 | 19364 | gi 566164258 | 21.06 | 3 | 1 | 1 |               | 59785  | hypothetical protein POPTR_0004s00900g [Populus trichocarpa]                                               |
| 2039 | 20707 | gi 566184883 | 20.88 | 1 | 1 | 1 |               | 68439  | hypothetical protein POPTR_0008s19430g [Populus trichocarpa]                                               |
| 1571 | 61748 | gi 566256176 | 20.8  | 4 | 1 | 1 | Oxidation (M) | 64121  | AMP-dependent synthetase and ligase family protein [Populus trichocarpa]                                   |
| 2086 | 21289 | gi 731386964 | 20.67 | 1 | 1 | 1 |               | 94119  | PREDICTED: beta-galactosidase 3 [Vitis vinifera]                                                           |
| 1699 | 61836 | gi 731390764 | 20.62 | 1 | 1 | 1 |               | 112504 | PREDICTED: pentatricopeptide repeat-containing protein At1g06710 mitochondrial isoform X2 [Vitis vinifera] |
| 2153 | 2086  | gi 225462297 | 20.52 | 5 | 1 | 1 |               | 56591  | PREDICTED: succinate-semialdehyde dehydrogenase mitochondrial-like [Vitis vinifera]                        |
| 1616 | 35039 | gi 224055551 | 20.39 | 3 | 1 | 1 |               | 52190  | monodehydroascorbate reductase family protein [Populus trichocarpa]                                        |
| 1638 | 25166 | gi 566207323 | 20.35 | 1 | 1 | 1 |               | 61858  | hypothetical protein POPTR_0015s12920g [Populus trichocarpa]                                               |

|      |       |              |       |   |   |   |                      |        |                                                                                  |
|------|-------|--------------|-------|---|---|---|----------------------|--------|----------------------------------------------------------------------------------|
| 1872 | 3118  | gi 359484223 | 20.26 | 1 | 1 | 1 |                      | 85770  | PREDICTED: probable galactinol--sucrose galactosyltransferase 6 [Vitis vinifera] |
| 2155 | 30805 | gi 566188564 | 20.2  | 3 | 1 | 1 |                      | 29723  | hypothetical protein POPTR_0010s00930g [Populus trichocarpa]                     |
| 1700 | 19305 | gi 566197081 | 20.2  | 1 | 1 | 1 |                      | 125576 | hypothetical protein POPTR_0012s06420g [Populus trichocarpa]                     |
| 1177 | 22431 | gi 566197112 | 20.06 | 5 | 1 | 1 | Carbamidomethylation | 14392  | hypothetical protein POPTR_0012s06720g [Populus trichocarpa]                     |

Table S4 The identified proteins in CK2

| Protein Group | Protein ID | Accession    | -10lgP | Coverage (%) | #Peptides | #Unique | PTM                                 | Avg. Mass | Description                                                                        |
|---------------|------------|--------------|--------|--------------|-----------|---------|-------------------------------------|-----------|------------------------------------------------------------------------------------|
| 2             | 6          | gi 359495606 | 290.99 | 53           | 48        | 3       | Carbamidomethylation; Oxidation (M) | 80006     | PREDICTED: heat shock cognate protein 80 [Vitis vinifera]                          |
| 3             | 7          | gi 225462013 | 288.01 | 51           | 47        | 3       | Carbamidomethylation                | 80849     | PREDICTED: heat shock cognate protein 80-like [Vitis vinifera]                     |
| 1             | 16386      | gi 669100005 | 278.08 | 70           | 43        | 43      | Carbamidomethylation; Oxidation (M) | 52635     | ribulose biphosphate carboxylase large chain (chloroplast) [Camellia crapnelliana] |
| 4             | 8          | gi 225426164 | 273    | 41           | 39        | 2       | Carbamidomethylation                | 80852     | PREDICTED: heat shock protein 83 [Vitis vinifera]                                  |
| 5             | 15         | gi 225464589 | 269.85 | 43           | 40        | 1       | Carbamidomethylation                | 80868     | PREDICTED: heat shock protein 83-like [Vitis vinifera]                             |
| 9             | 16417      | gi 224056837 | 269.1  | 40           | 39        | 2       | Carbamidomethylation; Oxidation (M) | 80026     | hypothetical protein POPTR_0001s47020g [Populus trichocarpa]                       |
| 17            | 1          | gi 225426385 | 266.36 | 74           | 32        | 1       | Carbamidomethylation                | 50292     | PREDICTED: tubulin beta-2 chain [Vitis vinifera]                                   |
| 26            | 16395      | gi 566195847 | 265.92 | 65           | 30        | 1       | Carbamidomethylation                | 50164     | tubulin beta chain family protein [Populus trichocarpa]                            |
| 13            | 5          | gi 359486799 | 261.06 | 53           | 39        | 2       | Carbamidomethylation; Oxidation (M) | 71171     | PREDICTED: heat shock cognate 70 kDa protein 2 [Vitis vinifera]                    |
| 14            | 10         | gi 225434984 | 258.38 | 56           | 40        | 1       | Carbamidomethylation; Oxidation (M) | 71235     | PREDICTED: heat shock cognate 70 kDa protein 2 [Vitis vinifera]                    |
| 19            | 16410      | gi 566191989 | 256.37 | 53           | 37        | 1       | Carbamidomethylation; Oxidation (M) | 71140     | heat shock protein 70 cognate [Populus trichocarpa]                                |
| 10            | 16404      | gi 224055984 | 254.67 | 71           | 25        | 3       | Carbamidomethylation; Oxidation (M) | 41696     | actin family protein [Populus trichocarpa]                                         |
| 12            | 12         | gi 731410014 | 253.55 | 69           | 24        | 1       | Carbamidomethylation                | 41593     | PREDICTED: actin-101 [Vitis vinifera]                                              |
| 53            | 18         | gi 225452767 | 249.82 | 66           | 30        | 3       | Carbamidomethylation                | 49622     | PREDICTED: tubulin alpha chain [Vitis vinifera]                                    |
| 40            | 17         | gi 225434722 | 247.75 | 63           | 28        | 2       | Carbamidomethylation                | 50275     | PREDICTED: tubulin beta-2 chain [Vitis vinifera]                                   |
| 22            | 16         | gi 225440324 | 244.78 | 43           | 34        | 1       | Carbamidomethylation; Oxidation (M) | 71066     | PREDICTED: heat shock cognate 70 kDa protein 2 [Vitis vinifera]                    |
| 77            | 20         | gi 225440045 | 244.24 | 52           | 40        | 3       | Carbamidomethylation; Oxidation (M) | 89589     | PREDICTED: cell division cycle protein 48 homolog [Vitis vinifera]                 |



|     |       |              |        |    |    |   |                                     |        |                                                                                                   |
|-----|-------|--------------|--------|----|----|---|-------------------------------------|--------|---------------------------------------------------------------------------------------------------|
| 15  | 16442 | gi 224056705 | 244    | 58 | 22 | 1 | Carbamidomethylation                | 41636  | actin family protein [Populus trichocarpa]                                                        |
| 58  | 19    | gi 731439963 | 240.57 | 62 | 28 | 1 | Carbamidomethylation                | 49600  | PREDICTED: tubulin alpha chain-like [Vitis vinifera]                                              |
| 81  | 16444 | gi 224094244 | 232.25 | 29 | 28 | 4 | Carbamidomethylation                | 93953  | elongation factor 2 family protein [Populus trichocarpa]                                          |
| 54  | 16430 | gi 566232573 | 232.15 | 35 | 27 | 1 | Carbamidomethylation                | 85012  | hypothetical protein POPTR_0019s05430g [Populus trichocarpa]                                      |
| 74  | 36    | gi 225426230 | 231.89 | 35 | 32 | 1 | Carbamidomethylation                | 73581  | PREDICTED: luminal-binding protein 5 [Vitis vinifera]                                             |
| 52  | 58    | gi 225449120 | 226.7  | 46 | 25 | 1 | Carbamidomethylation                | 49376  | PREDICTED: elongation factor 1-alpha [Vitis vinifera]                                             |
| 28  | 34    | gi 225432155 | 222.55 | 64 | 19 | 1 | Carbamidomethylation                | 43114  | PREDICTED: S-adenosylmethionine synthase 2 [Vitis vinifera]                                       |
| 36  | 33    | gi 225437708 | 222.42 | 65 | 18 | 1 | Carbamidomethylation                | 42793  | PREDICTED: S-adenosylmethionine synthase 5 [Vitis vinifera]                                       |
| 169 | 38    | gi 225448483 | 221.48 | 21 | 31 | 1 | Carbamidomethylation                | 192967 | PREDICTED: clathrin heavy chain 1 [Vitis vinifera]                                                |
| 72  | 46    | gi 225445820 | 219.22 | 33 | 23 | 2 | Carbamidomethylation; Oxidation (M) | 71402  | PREDICTED: heat shock 70 kDa protein [Vitis vinifera]                                             |
| 150 | 16490 | gi 566191652 | 218.34 | 21 | 35 | 2 | Carbamidomethylation                | 193360 | clathrin heavy chain family protein [Populus trichocarpa]                                         |
| 124 | 39    | gi 225462164 | 216.01 | 29 | 28 | 4 | Carbamidomethylation                | 93979  | PREDICTED: elongation factor 2 [Vitis vinifera]                                                   |
| 41  | 31    | gi 225439223 | 215    | 35 | 27 | 4 | Carbamidomethylation; Oxidation (M) | 84991  | PREDICTED: 5-methyltetrahydropteroyltriglutamate--homocysteine methyltransferase [Vitis vinifera] |
| 61  | 16455 | gi 566188155 | 213.72 | 32 | 26 | 3 | Carbamidomethylation                | 89855  | hypothetical protein POPTR_0009s15490g [Populus trichocarpa]                                      |
| 96  | 26    | gi 225456079 | 213.48 | 44 | 19 | 5 | Carbamidomethylation                | 59180  | PREDICTED: ATP synthase subunit beta mitochondrial-like [Vitis vinifera]                          |
| 98  | 70    | gi 359490716 | 213.37 | 30 | 28 | 1 | Carbamidomethylation                | 73489  | PREDICTED: luminal-binding protein 5-like isoform X2 [Vitis vinifera]                             |

|     |       |              |        |    |    |    |                                        |       |                                                                                                    |
|-----|-------|--------------|--------|----|----|----|----------------------------------------|-------|----------------------------------------------------------------------------------------------------|
| 100 | 16510 | gi 566146992 | 212.31 | 28 | 21 | 2  | Carbamidomethylation;<br>Oxidation (M) | 71904 | heat shock protein 70 cognate<br>[Populus trichocarpa]                                             |
| 66  | 16494 | gi 566146990 | 211.47 | 28 | 22 | 1  | Carbamidomethylation;<br>Oxidation (M) | 71882 | heat shock protein 70 cognate<br>[Populus trichocarpa]                                             |
| 86  | 44    | gi 359473642 | 207.04 | 26 | 20 | 3  | Carbamidomethylation                   | 90465 | PREDICTED: heat shock protein<br>90-1 [Vitis vinifera]                                             |
| 64  | 16461 | gi 566169643 | 206.61 | 56 | 21 | 1  | Carbamidomethylation                   | 42375 | NAD-dependent<br>epimerase/dehydratase family<br>protein [Populus trichocarpa]                     |
| 67  | 86    | gi 225439902 | 206.38 | 43 | 22 | 1  | Carbamidomethylation;<br>Oxidation (M) | 49336 | PREDICTED: elongation factor 1-<br>alpha [Vitis vinifera]                                          |
| 139 | 41    | gi 225456004 | 205.68 | 31 | 22 | 1  | Carbamidomethylation                   | 75635 | PREDICTED: stromal 70 kDa heat<br>shock-related protein chloroplastic<br>[Vitis vinifera]          |
| 76  | 16464 | gi 566199292 | 205    | 52 | 19 | 1  | Carbamidomethylation                   | 42361 | hypothetical protein<br>POPTR_0013s03790g [Populus<br>trichocarpa]                                 |
| 110 | 16500 | gi 224136806 | 204.78 | 43 | 20 | 5  | Carbamidomethylation                   | 47928 | hypothetical protein<br>POPTR_0015s14380g [Populus<br>trichocarpa]                                 |
| 130 | 16475 | gi 224099437 | 203.43 | 38 | 15 | 1  | Carbamidomethylation                   | 59970 | H <sup>+</sup> -transporting two-sector ATPase<br>family protein [Populus<br>trichocarpa]          |
| 129 | 16508 | gi 224144808 | 202.73 | 43 | 17 | 2  | Carbamidomethylation;<br>Oxidation (M) | 49595 | Tubulin alpha-1 chain family<br>protein [Populus trichocarpa]                                      |
| 99  | 16496 | gi 224085900 | 202.68 | 24 | 25 | 7  |                                        | 94047 | hypothetical protein<br>POPTR_0005s26260g [Populus<br>trichocarpa]                                 |
| 126 | 16476 | gi 566212215 | 201.33 | 47 | 21 | 2  | Carbamidomethylation;<br>Oxidation (M) | 53198 | adenosylhomocysteinase family<br>protein [Populus trichocarpa]                                     |
| 138 | 42    | gi 731393262 | 199.78 | 40 | 27 | 5  | Carbamidomethylation                   | 64608 | PREDICTED: ruBisCO large<br>subunit-binding protein subunit<br>beta chloroplastic [Vitis vinifera] |
| 174 | 16468 | gi 542688129 | 199.44 | 46 | 16 | 14 |                                        | 53694 | ATP synthase CF1 beta subunit<br>(chloroplast) [Camellia taliensis]                                |
| 105 | 16511 | gi 566196410 | 197.58 | 28 | 23 | 3  |                                        | 73406 | BiP isoform A family protein<br>[Populus trichocarpa]                                              |

|     |       |              |        |    |    |    |                      |       |                                                                                                           |
|-----|-------|--------------|--------|----|----|----|----------------------|-------|-----------------------------------------------------------------------------------------------------------|
| 160 | 78    | gi 359478916 | 196.34 | 40 | 14 | 4  | Carbamidomethylation | 48674 | PREDICTED: ribulose bisphosphate carboxylase/oxygenase activase chloroplastic isoform X2 [Vitis vinifera] |
| 151 | 16497 | gi 224088798 | 195.56 | 43 | 19 | 1  | Carbamidomethylation | 46974 | translation initiation factor eIF-4A family protein [Populus trichocarpa]                                 |
| 149 | 60    | gi 225429488 | 195.5  | 42 | 19 | 1  | Carbamidomethylation | 46873 | PREDICTED: eukaryotic initiation factor 4A-11 [Vitis vinifera]                                            |
| 221 | 17009 | gi 224065861 | 194.11 | 52 | 14 | 4  | Carbamidomethylation | 18243 | Peptidyl-prolyl cis-trans isomerase family protein [Populus trichocarpa]                                  |
| 152 | 16518 | gi 566204581 | 193.63 | 22 | 16 | 3  | Carbamidomethylation | 82947 | hypothetical protein POPTR_0014s16280g [Populus trichocarpa]                                              |
| 123 | 294   | gi 225437549 | 191.9  | 22 | 13 | 1  | Carbamidomethylation | 48111 | PREDICTED: calreticulin [Vitis vinifera]                                                                  |
| 50  | 112   | gi 731394274 | 191.36 | 44 | 17 | 2  | Carbamidomethylation | 42738 | PREDICTED: S-adenosylmethionine synthase 1 isoform X2 [Vitis vinifera]                                    |
| 207 | 16503 | gi 224073124 | 191.03 | 32 | 20 | 2  | Carbamidomethylation | 64544 | chaperonin precursor family protein [Populus trichocarpa]                                                 |
| 187 | 72    | gi 225456880 | 190.7  | 34 | 17 | 4  | Carbamidomethylation | 52692 | PREDICTED: elongation factor TuB chloroplastic [Vitis vinifera]                                           |
| 158 | 67    | gi 224365668 | 190.32 | 35 | 20 | 17 | Carbamidomethylation | 55143 | ATPase subunit 1 (mitochondrion) [Vitis vinifera]                                                         |
| 56  | 16553 | gi 224133862 | 190.3  | 44 | 18 | 1  | Carbamidomethylation | 36770 | glyceraldehyde-3-phosphate dehydrogenase family protein [Populus trichocarpa]                             |
| 135 | 94    | gi 225464999 | 189.66 | 36 | 15 | 5  |                      | 42422 | PREDICTED: phosphoglycerate kinase cytosolic [Vitis vinifera]                                             |
| 172 | 166   | gi 225433510 | 189.3  | 33 | 12 | 4  | Carbamidomethylation | 51906 | PREDICTED: serine hydroxymethyltransferase 4 [Vitis vinifera]                                             |
| 266 | 89    | gi 731402464 | 188.37 | 21 | 15 | 4  | Carbamidomethylation | 93319 | PREDICTED: heat shock 70 kDa protein 14-like [Vitis vinifera]                                             |

|     |       |              |        |    |    |    |                                     |        |                                                                                                            |
|-----|-------|--------------|--------|----|----|----|-------------------------------------|--------|------------------------------------------------------------------------------------------------------------|
| 60  | 16520 | gi 224109716 | 188.01 | 34 | 19 | 1  | Carbamidomethylation                | 49434  | hypothetical protein POPTR_0010s22620g [Populus trichocarpa]                                               |
| 208 | 116   | gi 731410136 | 187.36 | 17 | 15 | 3  | Carbamidomethylation                | 95223  | PREDICTED: heat shock protein 83 isoform X3 [Vitis vinifera]                                               |
| 91  | 16524 | gi 566176113 | 187.32 | 35 | 19 | 1  | Carbamidomethylation                | 49308  | hypothetical protein POPTR_0006s13310g [Populus trichocarpa]                                               |
| 142 | 104   | gi 225456806 | 186.23 | 36 | 18 | 1  | Carbamidomethylation                | 53079  | PREDICTED: adenosylhomocysteinase-like [Vitis vinifera]                                                    |
| 157 | 119   | gi 731415672 | 185.96 | 21 | 19 | 1  |                                     | 72363  | PREDICTED: mediator of RNA polymerase II transcription subunit 37a [Vitis vinifera]                        |
| 212 | 66    | gi 225460961 | 184.96 | 19 | 17 | 2  | Carbamidomethylation; Oxidation (M) | 110056 | PREDICTED: aconitate hydratase cytoplasmic [Vitis vinifera]                                                |
| 101 | 16541 | gi 566192207 | 184.76 | 40 | 20 | 1  | Carbamidomethylation                | 49434  | hypothetical protein POPTR_0010s22560g [Populus trichocarpa]                                               |
| 180 | 74    | gi 731393844 | 184.52 | 21 | 21 | 4  | Carbamidomethylation                | 101855 | PREDICTED: protein argonaute 4 [Vitis vinifera]                                                            |
| 125 | 100   | gi 225457939 | 184.37 | 23 | 22 | 3  | Carbamidomethylation                | 93220  | PREDICTED: endoplasmic reticulum chaperone homolog [Vitis vinifera]                                        |
| 249 | 61    | gi 731426977 | 182.6  | 26 | 23 | 17 | Carbamidomethylation                | 102347 | PREDICTED: ATP-dependent Clp protease ATP-binding subunit clpA homolog CD4B chloroplastic [Vitis vinifera] |
| 141 | 138   | gi 731423140 | 182.21 | 27 | 16 | 1  | Carbamidomethylation                | 55855  | PREDICTED: enolase [Vitis vinifera]                                                                        |
| 214 | 16544 | gi 566173508 | 182.19 | 32 | 13 | 2  | Carbamidomethylation                | 56756  | catalase family protein [Populus trichocarpa]                                                              |
| 155 | 16674 | gi 542688125 | 182.06 | 26 | 12 | 12 |                                     | 56099  | photosystem II p680 chlorophyll A apoprotein CP-47 (chloroplast) [Camellia taliensis]                      |
| 70  | 252   | gi 526117553 | 181.97 | 33 | 10 | 1  | Carbamidomethylation                | 39322  | glutamine synthetase cytosolic isoform 2 [Vitis vinifera]                                                  |
| 95  | 160   | gi 359491599 | 181.03 | 40 | 15 | 2  | Carbamidomethylation                | 36735  | PREDICTED: glyceraldehyde-3-phosphate dehydrogenase cytosolic [Vitis vinifera]                             |

|     |       |              |        |    |    |   |                      |        |                                                                                                     |
|-----|-------|--------------|--------|----|----|---|----------------------|--------|-----------------------------------------------------------------------------------------------------|
| 83  | 102   | gi 731393868 | 180.78 | 21 | 17 | 1 | Carbamidomethylation | 89385  | PREDICTED: 5-methyltetrahydropteroyltriglutamate--homocysteine methyltransferase 2 [Vitis vinifera] |
| 177 | 81    | gi 225461660 | 180.59 | 20 | 21 | 2 | Carbamidomethylation | 109823 | PREDICTED: phosphoenolpyruvate carboxylase housekeeping isozyme [Vitis vinifera]                    |
| 245 | 92    | gi 359479362 | 180.02 | 27 | 15 | 2 |                      | 61984  | PREDICTED: ruBisCO large subunit-binding protein subunit alpha [Vitis vinifera]                     |
| 292 | 82    | gi 225443399 | 179.9  | 30 | 18 | 1 | Carbamidomethylation | 68723  | PREDICTED: V-type proton ATPase catalytic subunit A [Vitis vinifera]                                |
| 159 | 16526 | gi 224063766 | 179.18 | 21 | 15 | 4 | Carbamidomethylation | 80716  | transketolase family protein [Populus trichocarpa]                                                  |
| 217 | 128   | gi 225430776 | 178.74 | 23 | 12 | 5 | Carbamidomethylation | 73659  | PREDICTED: succinate dehydrogenase [ubiquinone] flavoprotein subunit mitochondrial [Vitis vinifera] |
| 259 | 108   | gi 526117643 | 178.39 | 20 | 17 | 5 | Carbamidomethylation | 101329 | heat shock protein 101 [Vitis vinifera]                                                             |
| 163 | 145   | gi 225464995 | 178.14 | 32 | 15 | 2 | Carbamidomethylation | 50083  | PREDICTED: phosphoglycerate kinase chloroplastic [Vitis vinifera]                                   |
| 113 | 16693 | gi 566209405 | 178.1  | 33 | 14 | 1 | Carbamidomethylation | 44445  | hypothetical protein POPTR_0016s08780g [Populus trichocarpa]                                        |
| 179 | 16538 | gi 566153806 | 177.81 | 18 | 17 | 1 |                      | 110763 | phosphoenolpyruvate carboxylase family protein [Populus trichocarpa]                                |
| 213 | 85    | gi 225460328 | 176.71 | 21 | 16 | 1 | Carbamidomethylation | 74178  | PREDICTED: stromal 70 kDa heat shock-related protein chloroplastic-like [Vitis vinifera]            |
| 211 | 16609 | gi 224053971 | 176.59 | 30 | 15 | 2 | Carbamidomethylation | 52743  | hypothetical protein POPTR_0001s08770g [Populus trichocarpa]                                        |
| 230 | 16528 | gi 224104681 | 176.52 | 27 | 17 | 2 |                      | 61991  | RUBISCO SUBUNIT BINDING-protein ALPHA SUBUNIT [Populus trichocarpa]                                 |

|     |       |              |        |    |    |    |                                     |        |                                                                             |
|-----|-------|--------------|--------|----|----|----|-------------------------------------|--------|-----------------------------------------------------------------------------|
| 396 | 97    | gi 225441955 | 176.3  | 48 | 17 | 17 | Carbamidomethylation                | 47682  | PREDICTED: 26S protease regulatory subunit 7 [Vitis vinifera]               |
| 82  | 353   | gi 359483839 | 176.16 | 52 | 11 | 1  | Carbamidomethylation                | 27890  | PREDICTED: chlorophyll a-b binding protein of LHCII type 1 [Vitis vinifera] |
| 117 | 203   | gi 526117485 | 175.68 | 31 | 9  | 2  | Carbamidomethylation                | 40813  | naringenin 2-oxoglutarate 3-dioxygenase [Vitis vinifera]                    |
| 186 | 84    | gi 225442993 | 175.63 | 36 | 17 | 15 | Carbamidomethylation                | 48355  | PREDICTED: DEAD-box ATP-dependent RNA helicase 56 [Vitis vinifera]          |
| 457 | 111   | gi 225432252 | 175.16 | 38 | 13 | 1  | Carbamidomethylation                | 47374  | PREDICTED: 26S protease regulatory subunit 6A homolog [Vitis vinifera]      |
| 268 | 161   | gi 731388175 | 175.13 | 26 | 14 | 3  | Carbamidomethylation                | 65990  | PREDICTED: ATP-citrate synthase beta chain protein 2 [Vitis vinifera]       |
| 79  | 534   | gi 225461832 | 175.04 | 33 | 12 | 1  | Carbamidomethylation; Oxidation (M) | 28275  | PREDICTED: chlorophyll a-b binding protein of LHCII type 1 [Vitis vinifera] |
| 199 | 122   | gi 731430736 | 175.04 | 33 | 14 | 1  | Carbamidomethylation                | 44590  | PREDICTED: 60S ribosomal protein L3 [Vitis vinifera]                        |
| 161 | 110   | gi 359490179 | 174.78 | 21 | 14 | 3  | Carbamidomethylation                | 78856  | PREDICTED: transketolase chloroplastic [Vitis vinifera]                     |
| 231 | 16583 | gi 224079726 | 174.75 | 31 | 14 | 4  | Carbamidomethylation                | 46428  | isocitrate dehydrogenase family protein [Populus trichocarpa]               |
| 235 | 16672 | gi 566203657 | 174.73 | 26 | 11 | 6  | Carbamidomethylation                | 56866  | hypothetical protein POPTR_0014s10800g [Populus trichocarpa]                |
| 282 | 16560 | gi 566206267 | 174.04 | 17 | 16 | 4  | Carbamidomethylation                | 100324 | hypothetical protein POPTR_0015s06760g [Populus trichocarpa]                |
| 290 | 136   | gi 225456274 | 173.59 | 33 | 17 | 5  | Carbamidomethylation                | 55180  | PREDICTED: argininosuccinate synthase chloroplastic [Vitis vinifera]        |
| 197 | 127   | gi 731411443 | 173.25 | 29 | 13 | 1  | Carbamidomethylation                | 44506  | PREDICTED: 60S ribosomal protein L3-2 isoform X1 [Vitis vinifera]           |

|     |       |              |        |    |    |   |                      |        |                                                                                                    |
|-----|-------|--------------|--------|----|----|---|----------------------|--------|----------------------------------------------------------------------------------------------------|
| 188 | 16607 | gi 224109060 | 172.54 | 28 | 13 | 1 | Carbamidomethylation | 50212  | PHOSPHOGLYCERATE KINASE<br>1 family protein [Populus<br>trichocarpa]                               |
| 225 | 16612 | gi 566182577 | 172.09 | 34 | 11 | 3 | Carbamidomethylation | 48316  | hypothetical protein<br>POPTR_0008s05870g [Populus<br>trichocarpa]                                 |
| 227 | 16545 | gi 566168009 | 171.73 | 28 | 17 | 2 | Oxidation (M)        | 62041  | RUBISCO SUBUNIT BINDING-<br>protein ALPHA SUBUNIT<br>[Populus trichocarpa]                         |
| 270 | 130   | gi 731402352 | 171.08 | 23 | 18 | 2 | Carbamidomethylation | 65010  | PREDICTED: ruBisCO large<br>subunit-binding protein subunit<br>beta chloroplastic [Vitis vinifera] |
| 361 | 16605 | gi 224141947 | 170.88 | 27 | 12 | 2 | Carbamidomethylation | 53416  | hypothetical protein<br>POPTR_0018s02400g [Populus<br>trichocarpa]                                 |
| 107 | 16804 | gi 224053300 | 170.62 | 68 | 14 | 3 | Carbamidomethylation | 17702  | ubiquitin/ribosomal protein 27a<br>[Populus trichocarpa]                                           |
| 183 | 16572 | gi 566204141 | 170.57 | 34 | 13 | 4 | Carbamidomethylation | 42935  | hypothetical protein<br>POPTR_0014s13660g [Populus<br>trichocarpa]                                 |
| 243 | 16574 | gi 224058852 | 170.11 | 17 | 13 | 3 | Carbamidomethylation | 94161  | heat shock protein 70 [Populus<br>trichocarpa]                                                     |
| 90  | 159   | gi 225462777 | 169.63 | 36 | 15 | 2 | Carbamidomethylation | 42597  | PREDICTED: chalcone synthase 2<br>[Vitis vinifera]                                                 |
| 108 | 143   | gi 731415862 | 169.45 | 35 | 15 | 5 | Carbamidomethylation | 49362  | PREDICTED: calreticulin [Vitis<br>vinifera]                                                        |
| 223 | 146   | gi 731418890 | 169.34 | 28 | 13 | 1 | Carbamidomethylation | 52944  | PREDICTED: elongation factor Tu<br>chloroplastic-like [Vitis vinifera]                             |
| 206 | 16770 | gi 566212213 | 168.72 | 26 | 10 | 2 | Carbamidomethylation | 51876  | SERINE<br>HYDROXYMETHYLTRANSFER<br>ASE 4 family protein [Populus<br>trichocarpa]                   |
| 281 | 95    | gi 731379116 | 168.54 | 19 | 15 | 5 | Carbamidomethylation | 100128 | PREDICTED: puromycin-sensitive<br>aminopeptidase isoform X2 [Vitis<br>vinifera]                    |
| 484 | 155   | gi 225446449 | 168.39 | 16 | 11 | 2 | Carbamidomethylation | 97503  | PREDICTED: 26S proteasome<br>non-ATPase regulatory subunit 2<br>homolog A [Vitis vinifera]         |

|     |       |              |        |    |    |    |                                     |        |                                                                                                |
|-----|-------|--------------|--------|----|----|----|-------------------------------------|--------|------------------------------------------------------------------------------------------------|
| 455 | 154   | gi 225430151 | 167.68 | 47 | 17 | 16 | Carbamidomethylation                | 47221  | PREDICTED: 26S protease regulatory subunit 8 homolog A [Vitis vinifera]                        |
| 237 | 16604 | gi 566150406 | 167.41 | 17 | 17 | 1  | Carbamidomethylation                | 101827 | Argonaute 4 family protein [Populus trichocarpa]                                               |
| 321 | 16552 | gi 224101561 | 166.78 | 23 | 14 | 3  | Carbamidomethylation                | 65798  | subunit B of the trimeric enzyme ATP Citrate lyase family protein [Populus trichocarpa]        |
| 144 | 16585 | gi 224099261 | 166.2  | 17 | 16 | 2  | Carbamidomethylation                | 90156  | heat shock family protein [Populus trichocarpa]                                                |
| 399 | 16713 | gi 566213382 | 166.11 | 22 | 10 | 1  | Carbamidomethylation                | 53743  | phosphogluconate dehydrogenase family protein [Populus trichocarpa]                            |
| 247 | 101   | gi 225429228 | 165.65 | 25 | 14 | 2  |                                     | 72770  | PREDICTED: heat shock 70 kDa protein mitochondrial [Vitis vinifera]                            |
| 330 | 141   | gi 731419756 | 165.59 | 26 | 11 | 3  | Carbamidomethylation                | 52962  | PREDICTED: UDP-glucose 6-dehydrogenase 1 [Vitis vinifera]                                      |
| 366 | 16639 | gi 224086120 | 165.2  | 21 | 10 | 1  | Carbamidomethylation                | 67209  | pyrophosphate-dependent phosphofruktokinase alpha subunit family protein [Populus trichocarpa] |
| 233 | 16575 | gi 224063263 | 164.86 | 25 | 12 | 1  | Carbamidomethylation                | 58692  | 2-dehydro-3-deoxyphosphoheptonate aldolase family protein [Populus trichocarpa]                |
| 148 | 217   | gi 225437428 | 164.63 | 13 | 12 | 3  | Carbamidomethylation                | 92483  | PREDICTED: sucrose synthase 2 [Vitis vinifera]                                                 |
| 255 | 139   | gi 225468576 | 164.63 | 17 | 14 | 2  | Carbamidomethylation; Oxidation (M) | 98187  | PREDICTED: aconitate hydratase 1 [Vitis vinifera]                                              |
| 425 | 16576 | gi 224119200 | 164.4  | 15 | 17 | 2  | Carbamidomethylation                | 136903 | coatomer alpha subunit-like family protein [Populus trichocarpa]                               |
| 140 | 16640 | gi 671743230 | 164.27 | 19 | 11 | 10 | Carbamidomethylation                | 82370  | photosystem I P700 apoprotein A2 (chloroplast) [Camellia petelotii]                            |
| 191 | 16617 | gi 568244555 | 164.17 | 31 | 12 | 12 |                                     | 51822  | photosystem II CP43 chlorophyll apoprotein (plastid) [Camellia oleifera]                       |
| 109 | 121   | gi 225425884 | 163.97 | 44 | 17 | 1  | Carbamidomethylation                | 36759  | PREDICTED: glyceraldehyde-3-phosphate dehydrogenase cytosolic [Vitis vinifera]                 |



|     |       |              |        |    |    |    |                                     |        |                                                                           |
|-----|-------|--------------|--------|----|----|----|-------------------------------------|--------|---------------------------------------------------------------------------|
| 404 | 238   | gi 359481634 | 163.91 | 72 | 10 | 5  | Carbamidomethylation                | 16594  | PREDICTED: ubiquitin-conjugating enzyme E2 variant 1D [Vitis vinifera]    |
| 258 | 93    | gi 359496771 | 163.79 | 23 | 14 | 1  |                                     | 73271  | PREDICTED: heat shock 70 kDa protein mitochondrial-like [Vitis vinifera]  |
| 287 | 16787 | gi 224102193 | 162.99 | 33 | 11 | 4  | Carbamidomethylation; Oxidation (M) | 35716  | cytosolic malate dehydrogenase family protein [Populus trichocarpa]       |
| 189 | 16723 | gi 224141865 | 162.97 | 46 | 10 | 10 | Carbamidomethylation                | 25015  | GTP-binding family protein [Populus trichocarpa]                          |
| 440 | 16615 | gi 224078391 | 161.97 | 31 | 11 | 11 | Carbamidomethylation                | 54253  | vacuolar ATP synthase subunit B family protein [Populus trichocarpa]      |
| 236 | 198   | gi 731406211 | 161.31 | 11 | 11 | 3  | Carbamidomethylation                | 92443  | PREDICTED: sucrose synthase [Vitis vinifera]                              |
| 453 | 107   | gi 225452950 | 161.18 | 17 | 13 | 9  | Carbamidomethylation                | 109834 | PREDICTED: chaperone protein ClpB3 chloroplastic [Vitis vinifera]         |
| 364 | 189   | gi 731428324 | 160.6  | 7  | 13 | 4  | Carbamidomethylation                | 252296 | PREDICTED: acetyl-CoA carboxylase 1-like [Vitis vinifera]                 |
| 319 | 123   | gi 731391766 | 159.72 | 18 | 17 | 3  | Carbamidomethylation                | 127035 | PREDICTED: ubiquitin-activating enzyme E1 1 [Vitis vinifera]              |
| 313 | 16705 | gi 566210462 | 159.46 | 19 | 11 | 2  | Carbamidomethylation                | 67453  | Methylenetetrahydrofolate reductase family protein [Populus trichocarpa]  |
| 406 | 132   | gi 731428778 | 159.34 | 27 | 13 | 2  | Carbamidomethylation                | 56891  | PREDICTED: serine hydroxymethyltransferase mitochondrial [Vitis vinifera] |
| 370 | 16601 | gi 224069951 | 159.16 | 24 | 13 | 2  | Carbamidomethylation                | 61124  | Chaperonin CPN60-2 family protein [Populus trichocarpa]                   |
| 336 | 16665 | gi 224087339 | 158.81 | 23 | 10 | 2  |                                     | 57707  | biotin carboxylase precursor family protein [Populus trichocarpa]         |
| 275 | 16573 | gi 566151627 | 158.72 | 24 | 15 | 3  |                                     | 73210  | heat shock protein 70 [Populus trichocarpa]                               |
| 525 | 137   | gi 526117707 | 158.24 | 33 | 11 | 6  | Carbamidomethylation                | 53695  | uncharacterized protein LOC100261274 [Vitis vinifera]                     |
| 360 | 16970 | gi 568244554 | 158.12 | 27 | 7  | 7  |                                     | 39549  | photosystem II protein D2 (plastid) [Camellia oleifera]                   |

|     |       |              |        |    |    |   |                                        |        |                                                                                          |
|-----|-------|--------------|--------|----|----|---|----------------------------------------|--------|------------------------------------------------------------------------------------------|
| 80  | 186   | gi 526117870 | 158.04 | 33 | 12 | 1 | Carbamidomethylation                   | 42744  | chalcone synthase [Vitis vinifera]                                                       |
| 649 | 16755 | gi 566211390 | 157.76 | 13 | 9  | 1 | Carbamidomethylation                   | 97445  | hypothetical protein<br>POPTR_0017s04660g [Populus<br>trichocarpa]                       |
| 428 | 158   | gi 731388277 | 157.61 | 28 | 10 | 3 | Carbamidomethylation                   | 58138  | PREDICTED: importin subunit<br>alpha-1 isoform X1 [Vitis vinifera]                       |
| 277 | 295   | gi 359480275 | 156.95 | 35 | 9  | 2 | Oxidation (M)                          | 35505  | PREDICTED: malate<br>dehydrogenase cytoplasmic [Vitis<br>vinifera]                       |
| 475 | 17030 | gi 566150460 | 156.87 | 55 | 10 | 9 | Carbamidomethylation                   | 16862  | calmodulin-like protein 6a<br>[Populus trichocarpa]                                      |
| 295 | 194   | gi 225442018 | 156.61 | 29 | 10 | 1 | Carbamidomethylation                   | 33909  | PREDICTED: 40S ribosomal<br>protein SA [Vitis vinifera]                                  |
| 548 | 140   | gi 359475304 | 156.56 | 16 | 12 | 5 | Carbamidomethylation                   | 98624  | PREDICTED: coatomer subunit<br>gamma-2 [Vitis vinifera]                                  |
| 567 | 204   | gi 731401620 | 155.8  | 18 | 15 | 4 | Carbamidomethylation                   | 104406 | PREDICTED: ATPase 10 plasma<br>membrane-type [Vitis vinifera]                            |
| 528 | 500   | gi 225440011 | 155.66 | 16 | 9  | 2 |                                        | 77480  | PREDICTED: phenylalanine<br>ammonia-lyase [Vitis vinifera]                               |
| 69  | 168   | gi 359482256 | 155.32 | 33 | 12 | 1 | Carbamidomethylation;<br>Oxidation (M) | 42618  | PREDICTED: S-<br>adenosylmethionine synthase 3<br>[Vitis vinifera]                       |
| 599 | 206   | gi 731385022 | 155.32 | 16 | 11 | 6 | Carbamidomethylation                   | 114759 | PREDICTED: glycine<br>dehydrogenase (decarboxylating)<br>mitochondrial [Vitis vinifera]  |
| 541 | 16799 | gi 224097588 | 154.85 | 24 | 10 | 1 | Carbamidomethylation                   | 46583  | DnaJ family protein [Populus<br>trichocarpa]                                             |
| 506 | 286   | gi 731412519 | 154.52 | 16 | 9  | 1 | Carbamidomethylation                   | 78831  | PREDICTED: phenylalanine<br>ammonia-lyase G1 [Vitis vinifera]                            |
| 118 | 281   | gi 225465030 | 154.48 | 60 | 13 | 2 |                                        | 17196  | PREDICTED: ubiquitin-NEDD8-<br>like protein RUB2 [Vitis vinifera]                        |
| 210 | 16754 | gi 566176273 | 154.44 | 10 | 12 | 4 |                                        | 92143  | sucrose synthase family protein<br>[Populus trichocarpa]                                 |
| 359 | 349   | gi 359491680 | 154.42 | 47 | 8  | 3 | Carbamidomethylation                   | 17414  | PREDICTED: eukaryotic<br>translation initiation factor 5A-2<br>[Vitis vinifera]          |
| 607 | 156   | gi 225441236 | 154.42 | 9  | 11 | 4 | Carbamidomethylation                   | 177678 | PREDICTED: ferredoxin-<br>dependent glutamate synthase<br>chloroplastic [Vitis vinifera] |

|     |       |              |        |    |    |   |                      |        |                                                                                                    |
|-----|-------|--------------|--------|----|----|---|----------------------|--------|----------------------------------------------------------------------------------------------------|
| 378 | 16586 | gi 671743392 | 154.25 | 27 | 15 | 3 |                      | 55440  | ATP synthase CF1 alpha subunit (chloroplast) [Camellia reticulata]                                 |
| 391 | 187   | gi 225457674 | 154.02 | 17 | 9  | 1 | Carbamidomethylation | 67344  | PREDICTED: pyrophosphate--fructose 6-phosphate 1-phosphotransferase subunit alpha [Vitis vinifera] |
| 234 | 16610 | gi 566159486 | 153.93 | 13 | 15 | 2 | Carbamidomethylation | 113839 | hypothetical protein POPTR_0002s22720g [Populus trichocarpa]                                       |
| 346 | 16776 | gi 224095561 | 153.88 | 12 | 9  | 1 | Carbamidomethylation | 97704  | hypothetical protein POPTR_0007s01200g [Populus trichocarpa]                                       |
| 84  | 16660 | gi 566163210 | 153.82 | 30 | 13 | 1 | Carbamidomethylation | 42709  | naregenin-chalcone synthase family protein [Populus trichocarpa]                                   |
| 280 | 228   | gi 225451995 | 153.66 | 40 | 11 | 4 |                      | 29540  | PREDICTED: 14-3-3-like protein A [Vitis vinifera]                                                  |
| 344 | 16703 | gi 224063273 | 153.46 | 37 | 10 | 1 |                      | 29380  | 14-3-3 protein 32kDa endonuclease [Populus trichocarpa]                                            |
| 116 | 16659 | gi 224110772 | 153.35 | 35 | 14 | 1 | Carbamidomethylation | 37124  | glyceraldehyde 3-phosphate dehydrogenase family protein [Populus trichocarpa]                      |
| 392 | 304   | gi 225425053 | 153    | 21 | 10 | 1 | Carbamidomethylation | 53492  | PREDICTED: 6-phosphogluconate dehydrogenase decarboxylating 3 [Vitis vinifera]                     |
| 468 | 16898 | gi 224116086 | 152.95 | 25 | 7  | 2 | Carbamidomethylation | 37284  | hypothetical protein POPTR_0011s00500g [Populus trichocarpa]                                       |
| 216 | 16920 | gi 566167040 | 152.82 | 27 | 9  | 1 | Carbamidomethylation | 33502  | hypothetical protein POPTR_0004s17530g [Populus trichocarpa]                                       |
| 394 | 16826 | gi 224094759 | 152.81 | 18 | 7  | 1 | Carbamidomethylation | 69860  | Succinate dehydrogenase flavoprotein subunit [Populus trichocarpa]                                 |
| 417 | 200   | gi 225427768 | 152.78 | 26 | 9  | 3 | Carbamidomethylation | 42948  | PREDICTED: fructose-bisphosphate aldolase 1 chloroplastic [Vitis vinifera]                         |

|     |       |              |        |    |    |    |                      |        |                                                                        |
|-----|-------|--------------|--------|----|----|----|----------------------|--------|------------------------------------------------------------------------|
| 203 | 338   | gi 225427917 | 152.73 | 28 | 11 | 2  | Carbamidomethylation | 34675  | PREDICTED: triosephosphate isomerase chloroplastic [Vitis vinifera]    |
| 380 | 163   | gi 225456339 | 152.44 | 30 | 11 | 1  | Carbamidomethylation | 41981  | PREDICTED: UDP-arabinopyranose mutase 1 isoform X2 [Vitis vinifera]    |
| 416 | 16670 | gi 224073851 | 151.92 | 14 | 10 | 1  | Carbamidomethylation | 94625  | heat shock protein 70 [Populus trichocarpa]                            |
| 379 | 221   | gi 225445664 | 150.1  | 19 | 9  | 1  |                      | 57338  | PREDICTED: biotin carboxylase 1 chloroplastic [Vitis vinifera]         |
| 446 | 444   | gi 225437777 | 149.87 | 16 | 7  | 2  | Carbamidomethylation | 58724  | PREDICTED: putative proline--tRNA ligase C19C7.06 [Vitis vinifera]     |
| 375 | 16712 | gi 224100783 | 149.7  | 16 | 9  | 2  | Carbamidomethylation | 77598  | phenylalanine ammonia-lyase family protein [Populus trichocarpa]       |
| 552 | 223   | gi 225429530 | 149.43 | 19 | 8  | 3  | Carbamidomethylation | 54362  | PREDICTED: UDP-sulfoquinovose synthase chloroplastic [Vitis vinifera]  |
| 418 | 192   | gi 225434712 | 149.36 | 37 | 9  | 4  | Carbamidomethylation | 29576  | PREDICTED: proliferating cell nuclear antigen [Vitis vinifera]         |
| 388 | 17072 | gi 224114557 | 149.36 | 23 | 7  | 3  | Carbamidomethylation | 35588  | Malate dehydrogenase family protein [Populus trichocarpa]              |
| 402 | 16781 | gi 566165396 | 149.15 | 20 | 9  | 1  | Carbamidomethylation | 51757  | hypothetical protein POPTR_0004s07280g [Populus trichocarpa]           |
| 184 | 16939 | gi 224109788 | 149.12 | 28 | 8  | 1  | Carbamidomethylation | 37547  | putative adenosine kinase family protein [Populus trichocarpa]         |
| 250 | 214   | gi 526117762 | 149.09 | 39 | 11 | 1  | Carbamidomethylation | 29376  | 14-3-3 protein [Vitis vinifera]                                        |
| 352 | 254   | gi 225430619 | 148.99 | 42 | 10 | 10 | Carbamidomethylation | 22781  | PREDICTED: 40S ribosomal protein S5 [Vitis vinifera]                   |
| 565 | 239   | gi 225458111 | 148.47 | 8  | 9  | 1  |                      | 136997 | PREDICTED: coatomer subunit alpha-1 [Vitis vinifera]                   |
| 626 | 241   | gi 731413130 | 148.41 | 15 | 11 | 5  | Oxidation (M)        | 116111 | PREDICTED: 2-oxoglutarate dehydrogenase mitochondrial [Vitis vinifera] |
| 334 | 17104 | gi 671743459 | 148.36 | 81 | 6  | 6  | Carbamidomethylation | 9038   | photosystem I subunit VII (chloroplast) [Camellia reticulata]          |

|     |       |              |        |    |    |    |                                        |        |                                                                                       |
|-----|-------|--------------|--------|----|----|----|----------------------------------------|--------|---------------------------------------------------------------------------------------|
| 373 | 237   | gi 225446579 | 148.26 | 17 | 10 | 4  | Carbamidomethylation;<br>Oxidation (M) | 63486  | PREDICTED: ketol-acid reductoisomerase chloroplastic [Vitis vinifera]                 |
| 181 | 494   | gi 225449541 | 147.78 | 29 | 8  | 2  | Carbamidomethylation                   | 27128  | PREDICTED: triosephosphate isomerase cytosolic [Vitis vinifera]                       |
| 520 | 16872 | gi 566170807 | 147.62 | 26 | 10 | 1  | Carbamidomethylation                   | 40534  | Chain A family protein [Populus trichocarpa]                                          |
| 232 | 16732 | gi 435856353 | 147.22 | 29 | 10 | 10 | Carbamidomethylation                   | 38951  | photosystem II protein D1 (chloroplast) [Camellia sinensis]                           |
| 964 | 362   | gi 225464186 | 147.13 | 25 | 8  | 8  | Carbamidomethylation                   | 49585  | PREDICTED: 26S proteasome regulatory subunit 4 homolog B [Vitis vinifera]             |
| 608 | 16748 | gi 224060514 | 146.71 | 15 | 9  | 4  | Carbamidomethylation                   | 70476  | polyadenylate-binding family protein [Populus trichocarpa]                            |
| 551 | 135   | gi 731402494 | 146.67 | 17 | 13 | 5  | Carbamidomethylation                   | 102377 | PREDICTED: coatomer subunit beta'-1 [Vitis vinifera]                                  |
| 492 | 585   | gi 225444377 | 146.48 | 23 | 6  | 1  | Carbamidomethylation                   | 38105  | PREDICTED: thiamine thiazole synthase 2 chloroplastic [Vitis vinifera]                |
| 300 | 16706 | gi 224113365 | 146.01 | 10 | 11 | 1  | Carbamidomethylation                   | 130750 | NtN2 family protein [Populus trichocarpa]                                             |
| 173 | 165   | gi 359493870 | 145.68 | 24 | 12 | 4  | Carbamidomethylation                   | 42815  | PREDICTED: protochlorophyllide reductase chloroplastic [Vitis vinifera]               |
| 479 | 282   | gi 731423943 | 145.06 | 45 | 8  | 2  | Carbamidomethylation                   | 19961  | PREDICTED: 40S ribosomal protein S10 [Vitis vinifera]                                 |
| 424 | 317   | gi 225441799 | 145.01 | 31 | 10 | 3  | Carbamidomethylation                   | 29974  | PREDICTED: 40S ribosomal protein S2-3 [Vitis vinifera]                                |
| 441 | 374   | gi 225426162 | 144.86 | 43 | 8  | 2  | Carbamidomethylation                   | 20013  | PREDICTED: 40S ribosomal protein S10 [Vitis vinifera]                                 |
| 655 | 393   | gi 359473789 | 144.66 | 32 | 9  | 1  | Carbamidomethylation;<br>Oxidation (M) | 28023  | PREDICTED: peptidyl-prolyl cis-trans isomerase CYP20-2 chloroplastic [Vitis vinifera] |
| 170 | 170   | gi 225446944 | 144.66 | 35 | 11 | 3  | Carbamidomethylation                   | 43340  | PREDICTED: protochlorophyllide reductase [Vitis vinifera]                             |
| 472 | 16661 | gi 134093182 | 144.63 | 22 | 13 | 1  |                                        | 55322  | ATP synthase CF1 alpha subunit (chloroplast) [Populus trichocarpa]                    |
| 288 | 176   | gi 225448546 | 144.33 | 34 | 10 | 1  | Carbamidomethylation                   | 29880  | PREDICTED: 40S ribosomal protein S4-1 [Vitis vinifera]                                |

|     |       |              |        |    |    |    |                                     |        |                                                                              |
|-----|-------|--------------|--------|----|----|----|-------------------------------------|--------|------------------------------------------------------------------------------|
| 502 | 16729 | gi 566160536 | 144.06 | 14 | 9  | 1  | Carbamidomethylation                | 91733  | phospholipase D family protein [Populus trichocarpa]                         |
| 289 | 16635 | gi 566178983 | 144.03 | 33 | 13 | 1  | Oxidation (M)                       | 41070  | hypothetical protein POPTR_0007s01010g [Populus trichocarpa]                 |
| 482 | 17010 | gi 566171046 | 143.74 | 11 | 6  | 1  | Carbamidomethylation                | 70165  | hypothetical protein POPTR_0005s12530g [Populus trichocarpa]                 |
| 448 | 218   | gi 731395250 | 143.41 | 23 | 9  | 2  | Carbamidomethylation                | 48931  | PREDICTED: elongation factor Tu mitochondrial [Vitis vinifera]               |
| 447 | 371   | gi 225457957 | 143.38 | 44 | 9  | 1  | Carbamidomethylation                | 17938  | PREDICTED: peptidyl-prolyl cis-trans isomerase [Vitis vinifera]              |
| 269 | 16633 | gi 566186668 | 143.3  | 29 | 12 | 2  |                                     | 41811  | ADP family protein [Populus trichocarpa]                                     |
| 353 | 177   | gi 731398850 | 143.22 | 13 | 10 | 2  | Carbamidomethylation                | 113970 | PREDICTED: ubiquitin-activating enzyme E1 1-like isoform X2 [Vitis vinifera] |
| 720 | 16801 | gi 224105405 | 143.16 | 10 | 7  | 1  | Carbamidomethylation                | 98780  | hypothetical protein POPTR_0009s11800g [Populus trichocarpa]                 |
| 316 | 307   | gi 225468761 | 143.1  | 26 | 7  | 1  | Carbamidomethylation                | 35289  | PREDICTED: oxygen-evolving enhancer protein 1 chloroplastic [Vitis vinifera] |
| 405 | 16636 | gi 566181869 | 142.74 | 28 | 15 | 3  | Carbamidomethylation                | 54252  | hypothetical protein POPTR_0008s02110g [Populus trichocarpa]                 |
| 430 | 16889 | gi 566170533 | 142.68 | 20 | 8  | 8  | Carbamidomethylation                | 47176  | hypothetical protein POPTR_0005s10290g [Populus trichocarpa]                 |
| 467 | 229   | gi 731427020 | 142.52 | 18 | 11 | 4  | Carbamidomethylation; Oxidation (M) | 76330  | PREDICTED: glycine--tRNA ligase 1 mitochondrial [Vitis vinifera]             |
| 311 | 16634 | gi 224059642 | 142.51 | 29 | 12 | 1  |                                     | 42100  | adenine nucleotide translocator family protein [Populus trichocarpa]         |
| 540 | 222   | gi 225430398 | 142.44 | 21 | 10 | 8  |                                     | 50823  | PREDICTED: aspartate aminotransferase chloroplastic [Vitis vinifera]         |
| 577 | 209   | gi 731408286 | 142.31 | 27 | 11 | 11 | Carbamidomethylation                | 53389  | PREDICTED: xylose isomerase [Vitis vinifera]                                 |

|     |       |              |        |    |    |   |                      |       |                                                                              |
|-----|-------|--------------|--------|----|----|---|----------------------|-------|------------------------------------------------------------------------------|
| 456 | 363   | gi 225464852 | 142.26 | 57 | 6  | 1 | Carbamidomethylation | 16577 | PREDICTED: ubiquitin-conjugating enzyme E2 variant 1D [Vitis vinifera]       |
| 487 | 367   | gi 225444472 | 142.18 | 20 | 8  | 3 | Carbamidomethylation | 44306 | PREDICTED: aminomethyltransferase mitochondrial [Vitis vinifera]             |
| 491 | 171   | gi 225441044 | 141.72 | 19 | 9  | 2 |                      | 57520 | PREDICTED: pyruvate kinase cytosolic isozyme-like [Vitis vinifera]           |
| 279 | 175   | gi 225434482 | 141.59 | 34 | 10 | 1 | Carbamidomethylation | 29851 | PREDICTED: 40S ribosomal protein S4 [Vitis vinifera]                         |
| 542 | 583   | gi 225435357 | 141.47 | 13 | 8  | 2 | Carbamidomethylation | 77966 | PREDICTED: phenylalanine ammonia-lyase [Vitis vinifera]                      |
| 521 | 563   | gi 731376167 | 141.3  | 28 | 5  | 5 | Carbamidomethylation | 29267 | PREDICTED: proteasome subunit beta type-5 [Vitis vinifera]                   |
| 342 | 258   | gi 731404310 | 141.07 | 25 | 7  | 4 | Carbamidomethylation | 33129 | PREDICTED: putative lactoylglutathione lyase [Vitis vinifera]                |
| 228 | 17398 | gi 224138586 | 140.95 | 18 | 5  | 2 |                      | 27577 | ascorbate peroxidase family protein [Populus trichocarpa]                    |
| 489 | 17097 | gi 566161423 | 140.94 | 28 | 7  | 7 | Carbamidomethylation | 24286 | 60S ribosomal protein L15 [Populus trichocarpa]                              |
| 594 | 173   | gi 225451806 | 140.81 | 28 | 10 | 1 | Carbamidomethylation | 40505 | PREDICTED: UDP-arabinopyranose mutase 3 [Vitis vinifera]                     |
| 584 | 17023 | gi 566202051 | 140.72 | 11 | 6  | 1 | Carbamidomethylation | 71118 | hypothetical protein POPTR_0014s02550g [Populus trichocarpa]                 |
| 309 | 149   | gi 225435480 | 140.53 | 26 | 11 | 1 |                      | 42838 | PREDICTED: ADP ATP carrier protein mitochondrial [Vitis vinifera]            |
| 613 | 16728 | gi 566174183 | 140.48 | 28 | 9  | 8 | Carbamidomethylation | 43533 | 26S proteasome subunit 7 family protein [Populus trichocarpa]                |
| 298 | 313   | gi 225458424 | 140.37 | 22 | 7  | 1 | Carbamidomethylation | 35120 | PREDICTED: oxygen-evolving enhancer protein 1 chloroplastic [Vitis vinifera] |
| 198 | 440   | gi 225461156 | 140.33 | 61 | 7  | 3 |                      | 13980 | PREDICTED: probable histone H2A.2 [Vitis vinifera]                           |

|     |       |              |        |    |    |    |                      |       |                                                                                                |
|-----|-------|--------------|--------|----|----|----|----------------------|-------|------------------------------------------------------------------------------------------------|
| 733 | 231   | gi 225450275 | 140.2  | 33 | 7  | 1  | Carbamidomethylation | 35771 | PREDICTED: serine/threonine-protein phosphatase PP2A-2 catalytic subunit [Vitis vinifera]      |
| 443 | 253   | gi 225451581 | 140.16 | 23 | 8  | 3  | Carbamidomethylation | 38690 | PREDICTED: mitochondrial phosphate carrier protein 3 mitochondrial isoform X1 [Vitis vinifera] |
| 604 | 525   | gi 225426063 | 140.06 | 18 | 8  | 2  | Carbamidomethylation | 53896 | PREDICTED: 6-phosphogluconate dehydrogenase decarboxylating 1 chloroplastic [Vitis vinifera]   |
| 555 | 625   | gi 225431122 | 139.99 | 26 | 10 | 1  | Carbamidomethylation | 40534 | PREDICTED: ferredoxin--NADP reductase leaf-type isozyme chloroplastic [Vitis vinifera]         |
| 595 | 411   | gi 359497202 | 139.96 | 16 | 8  | 8  | Carbamidomethylation | 60614 | PREDICTED: T-complex protein 1 subunit eta [Vitis vinifera]                                    |
| 314 | 17045 | gi 224084209 | 139.96 | 21 | 7  | 1  | Carbamidomethylation | 35142 | O2 evolving complex 33kD family protein [Populus trichocarpa]                                  |
| 432 | 16791 | gi 566173570 | 139.7  | 24 | 9  | 1  | Carbamidomethylation | 44912 | hypothetical protein POPTR_0005s27550g [Populus trichocarpa]                                   |
| 638 | 17264 | gi 224121954 | 139.25 | 28 | 6  | 1  | Carbamidomethylation | 26774 | hypothetical protein POPTR_0012s09720g [Populus trichocarpa]                                   |
| 355 | 16655 | gi 224146592 | 138.91 | 47 | 11 | 11 | Carbamidomethylation | 24975 | 60S ribosomal protein L10 [Populus trichocarpa]                                                |
| 331 | 188   | gi 731408817 | 138.4  | 29 | 11 | 1  | Oxidation (M)        | 41099 | PREDICTED: ADP ATP carrier protein 3 mitochondrial [Vitis vinifera]                            |
| 678 | 16687 | gi 224062085 | 138.35 | 27 | 9  | 8  | Carbamidomethylation | 44915 | 26S proteasome AAA-ATPase subunit family protein [Populus trichocarpa]                         |
| 285 | 255   | gi 526117940 | 138.23 | 9  | 7  | 2  | Carbamidomethylation | 91805 | phospholipase D alpha [Vitis vinifera]                                                         |
| 127 | 16968 | gi 566210965 | 138.21 | 29 | 10 | 1  | Carbamidomethylation | 39217 | glutamate-ammonia ligase family protein [Populus trichocarpa]                                  |
| 194 | 16815 | gi 224117218 | 138.16 | 22 | 9  | 1  | Carbamidomethylation | 43107 | NADPH-protochlorophyllide oxidoreductase family protein [Populus trichocarpa]                  |



|     |       |              |        |    |    |    |                      |        |                                                                                                   |
|-----|-------|--------------|--------|----|----|----|----------------------|--------|---------------------------------------------------------------------------------------------------|
| 656 | 17350 | gi 566209174 | 138.03 | 24 | 6  | 1  | Carbamidomethylation | 29522  | peroxiredoxin family protein [Populus trichocarpa]                                                |
| 601 | 292   | gi 225439231 | 137.83 | 15 | 7  | 2  | Carbamidomethylation | 55389  | PREDICTED: 3-isopropylmalate dehydratase large subunit-like [Vitis vinifera]                      |
| 515 | 447   | gi 359494836 | 137.8  | 11 | 7  | 3  | Carbamidomethylation | 61508  | PREDICTED: pyrophosphate--fructose 6-phosphate 1-phosphotransferase subunit beta [Vitis vinifera] |
| 702 | 247   | gi 225452974 | 137.75 | 20 | 12 | 8  |                      | 58482  | PREDICTED: probable mitochondrial-processing peptidase subunit beta [Vitis vinifera]              |
| 347 | 365   | gi 225459918 | 137.65 | 34 | 8  | 3  | Carbamidomethylation | 30824  | PREDICTED: chlorophyll a-b binding protein CP26 chloroplastic [Vitis vinifera]                    |
| 426 | 448   | gi 526117711 | 137.54 | 21 | 6  | 1  | Carbamidomethylation | 36875  | malate dehydrogenase [Vitis vinifera]                                                             |
| 471 | 314   | gi 225432110 | 137.27 | 19 | 10 | 10 | Carbamidomethylation | 52920  | PREDICTED: dihydrolipoyl dehydrogenase mitochondrial [Vitis vinifera]                             |
| 554 | 16962 | gi 224128376 | 137.18 | 19 | 8  | 4  | Carbamidomethylation | 39401  | thioredoxin family protein [Populus trichocarpa]                                                  |
| 708 | 16798 | gi 566149322 | 136.87 | 11 | 10 | 1  | Carbamidomethylation | 105097 | putative plasma membrane H <sup>+</sup> ATPase family protein [Populus trichocarpa]               |
| 415 | 16874 | gi 224082478 | 136.7  | 21 | 9  | 1  | Carbamidomethylation | 44381  | ribosomal protein 1 [Populus trichocarpa]                                                         |
| 384 | 16823 | gi 224104269 | 136.26 | 37 | 9  | 1  | Carbamidomethylation | 22228  | peptidyl-prolyl cis-trans isomerase family protein [Populus trichocarpa]                          |
| 531 | 16824 | gi 566159427 | 135.75 | 21 | 9  | 1  | Carbamidomethylation | 49034  | Elongation factor Tu family protein [Populus trichocarpa]                                         |
| 646 | 321   | gi 225457058 | 135.65 | 16 | 9  | 1  | Carbamidomethylation | 60477  | PREDICTED: T-complex protein 1 subunit gamma [Vitis vinifera]                                     |
| 306 | 17071 | gi 224101413 | 135.45 | 45 | 6  | 1  | Carbamidomethylation | 17417  | eukaryotic translation initiation factor 5A isoform VI family protein [Populus trichocarpa]       |

|     |       |              |        |    |    |   |                      |        |                                                                                              |
|-----|-------|--------------|--------|----|----|---|----------------------|--------|----------------------------------------------------------------------------------------------|
| 519 | 610   | gi 225464928 | 135.43 | 15 | 9  | 2 |                      | 46452  | PREDICTED: eukaryotic initiation factor 4A-3 [ <i>Vitis vinifera</i> ]                       |
| 133 | 16986 | gi 224079530 | 135.3  | 26 | 10 | 1 | Carbamidomethylation | 39256  | glutamate-ammonia ligase family protein [ <i>Populus trichocarpa</i> ]                       |
| 576 | 337   | gi 225423961 | 135.11 | 11 | 8  | 4 | Carbamidomethylation | 103148 | PREDICTED: alpha-xylosidase 1 [ <i>Vitis vinifera</i> ]                                      |
| 516 | 17017 | gi 566210666 | 135.06 | 14 | 7  | 1 | Carbamidomethylation | 51605  | hypothetical protein POPTR_0017s01390g [ <i>Populus trichocarpa</i> ]                        |
| 193 | 16937 | gi 224098421 | 134.88 | 34 | 10 | 2 | Carbamidomethylation | 27259  | Triosephosphate isomerase family protein [ <i>Populus trichocarpa</i> ]                      |
| 403 | 16833 | gi 566186876 | 134.87 | 12 | 11 | 2 | Carbamidomethylation | 122028 | hypothetical protein POPTR_0009s07950g partial [ <i>Populus trichocarpa</i> ]                |
| 296 | 16829 | gi 224087813 | 134.77 | 29 | 8  | 1 | Carbamidomethylation | 29763  | hypothetical protein POPTR_0006s10460g [ <i>Populus trichocarpa</i> ]                        |
| 579 | 16969 | gi 224097488 | 134.76 | 7  | 8  | 1 | Carbamidomethylation | 103480 | hypothetical protein POPTR_0008s01100g [ <i>Populus trichocarpa</i> ]                        |
| 593 | 16923 | gi 552540866 | 134.63 | 27 | 8  | 8 |                      | 35220  | cytochrome f (chloroplast) [ <i>Camellia danzaiensis</i> ]                                   |
| 333 | 16825 | gi 566210060 | 134.31 | 29 | 8  | 1 | Carbamidomethylation | 29720  | hypothetical protein POPTR_0016s13210g [ <i>Populus trichocarpa</i> ]                        |
| 559 | 404   | gi 225435782 | 134.17 | 18 | 8  | 4 | Carbamidomethylation | 44564  | PREDICTED: 60S ribosomal protein L4 [ <i>Vitis vinifera</i> ]                                |
| 848 | 17053 | gi 566184833 | 134.1  | 17 | 7  | 2 | Carbamidomethylation | 53373  | alanine-2-oxoglutarate aminotransferase 1 family protein [ <i>Populus trichocarpa</i> ]      |
| 327 | 17257 | gi 224108938 | 133.74 | 38 | 5  | 1 | Carbamidomethylation | 17381  | hypothetical protein POPTR_0010s17020g [ <i>Populus trichocarpa</i> ]                        |
| 751 | 16897 | gi 224135653 | 133.48 | 10 | 8  | 1 | Carbamidomethylation | 106660 | putative plasma membrane H <sup>+</sup> ATPase family protein [ <i>Populus trichocarpa</i> ] |
| 254 | 16941 | gi 224059598 | 133.44 | 36 | 7  | 7 |                      | 24937  | 40S ribosomal protein S8 [ <i>Populus trichocarpa</i> ]                                      |

|     |       |              |        |    |   |   |                      |        |                                                                                         |
|-----|-------|--------------|--------|----|---|---|----------------------|--------|-----------------------------------------------------------------------------------------|
| 459 | 16756 | gi 566157403 | 133.14 | 20 | 9 | 1 | Carbamidomethylation | 57254  | hypothetical protein POPTR_0002s10990g [Populus trichocarpa]                            |
| 765 | 335   | gi 225445867 | 133.04 | 14 | 6 | 3 | Carbamidomethylation | 60743  | PREDICTED: leucine aminopeptidase 1 [Vitis vinifera]                                    |
| 611 | 414   | gi 225429452 | 132.74 | 17 | 8 | 7 | Carbamidomethylation | 57141  | PREDICTED: serine hydroxymethyltransferase 3 chloroplastic [Vitis vinifera]             |
| 783 | 17061 | gi 224092184 | 132.62 | 15 | 7 | 2 | Carbamidomethylation | 53653  | hypothetical protein POPTR_0006s24440g [Populus trichocarpa]                            |
| 813 | 416   | gi 225456641 | 132.26 | 10 | 8 | 1 | Carbamidomethylation | 105309 | PREDICTED: plasma membrane ATPase 1 isoform X1 [Vitis vinifera]                         |
| 524 | 417   | gi 225429850 | 132.23 | 31 | 6 | 4 |                      | 24915  | PREDICTED: proteasome subunit beta type-6 [Vitis vinifera]                              |
| 512 | 351   | gi 225457231 | 132.22 | 14 | 6 | 2 |                      | 56145  | PREDICTED: flavonoid 3'-monooxygenase [Vitis vinifera]                                  |
| 634 | 17820 | gi 566175251 | 131.87 | 12 | 5 | 5 |                      | 34569  | hypothetical protein POPTR_0006s08710g [Populus trichocarpa]                            |
| 168 | 17277 | gi 566170863 | 131.82 | 53 | 8 | 8 |                      | 11409  | histone H4 family protein [Populus trichocarpa]                                         |
| 556 | 271   | gi 225439064 | 131.81 | 15 | 8 | 4 |                      | 61092  | PREDICTED: 2 3-bisphosphoglycerate-independent phosphoglycerate mutase [Vitis vinifera] |
| 966 | 852   | gi 225423722 | 131.72 | 30 | 5 | 2 |                      | 25584  | PREDICTED: proteasome subunit alpha type-2-B [Vitis vinifera]                           |
| 566 | 16785 | gi 224075451 | 131.61 | 12 | 9 | 2 | Carbamidomethylation | 77174  | Glycyl-tRNA synthetase family protein [Populus trichocarpa]                             |
| 690 | 455   | gi 225434259 | 131.58 | 18 | 8 | 1 | Carbamidomethylation | 49810  | PREDICTED: guanosine nucleotide diphosphate dissociation inhibitor 2 [Vitis vinifera]   |
| 337 | 333   | gi 225447725 | 131.56 | 14 | 6 | 3 | Carbamidomethylation | 61438  | PREDICTED: calnexin homolog [Vitis vinifera]                                            |
| 703 | 449   | gi 731420830 | 131.16 | 26 | 6 | 1 |                      | 31951  | PREDICTED: prohibitin-1 mitochondrial [Vitis vinifera]                                  |

|     |       |              |        |    |    |   |                      |        |                                                                                                  |
|-----|-------|--------------|--------|----|----|---|----------------------|--------|--------------------------------------------------------------------------------------------------|
| 444 | 245   | gi 225462254 | 131.15 | 25 | 11 | 2 | Carbamidomethylation | 45573  | PREDICTED: glyceraldehyde-3-phosphate dehydrogenase GAPCP1 chloroplastic [Vitis vinifera]        |
| 682 | 243   | gi 225429750 | 131.03 | 13 | 11 | 4 | Carbamidomethylation | 105919 | PREDICTED: coatomer subunit beta-1 [Vitis vinifera]                                              |
| 782 | 16998 | gi 566156890 | 130.93 | 19 | 8  | 2 |                      | 44077  | hypothetical protein POPTR_0002s08240g [Populus trichocarpa]                                     |
| 693 | 17028 | gi 224095286 | 130.8  | 20 | 8  | 1 | Carbamidomethylation | 49785  | GDP dissociation inhibitor family protein [Populus trichocarpa]                                  |
| 648 | 16707 | gi 224126969 | 130.77 | 20 | 10 | 2 |                      | 58085  | hypothetical protein POPTR_0013s15380g [Populus trichocarpa]                                     |
| 166 | 467   | gi 225439749 | 130.73 | 50 | 5  | 3 |                      | 15764  | PREDICTED: histone H2A [Vitis vinifera]                                                          |
| 793 | 17494 | gi 224134414 | 130.65 | 30 | 5  | 2 |                      | 25625  | Proteasome subunit alpha type 2 family protein [Populus trichocarpa]                             |
| 374 | 584   | gi 225451279 | 130.56 | 20 | 6  | 1 |                      | 29903  | PREDICTED: 40S ribosomal protein S3a-2-like [Vitis vinifera]                                     |
| 462 | 16945 | gi 224090986 | 130.46 | 29 | 8  | 7 | Carbamidomethylation | 31176  | chlorophyll a/b binding protein CP29 [Populus trichocarpa]                                       |
| 883 | 16899 | gi 566190691 | 130.41 | 16 | 7  | 1 | Carbamidomethylation | 65588  | Ser/Thr specific protein phosphatase 2A A regulatory subunit alpha isoform [Populus trichocarpa] |
| 335 | 16800 | gi 224129102 | 130.31 | 26 | 9  | 9 | Carbamidomethylation | 42388  | hypothetical protein POPTR_0014s15960g [Populus trichocarpa]                                     |
| 294 | 595   | gi 225447408 | 130.15 | 35 | 8  | 3 | Carbamidomethylation | 28115  | PREDICTED: 60S ribosomal protein L8 [Vitis vinifera]                                             |
| 185 | 16812 | gi 566168262 | 130.09 | 20 | 11 | 4 |                      | 47873  | elongation factor 1-gamma 1 family protein [Populus trichocarpa]                                 |
| 809 | 306   | gi 731438745 | 129.96 | 11 | 8  | 3 | Carbamidomethylation | 92847  | PREDICTED: DNA replication licensing factor MCM6 [Vitis vinifera]                                |

|     |       |              |        |    |    |   |                                     |        |                                                                               |
|-----|-------|--------------|--------|----|----|---|-------------------------------------|--------|-------------------------------------------------------------------------------|
| 759 | 16820 | gi 566256635 | 129.89 | 17 | 8  | 1 | Carbamidomethylation                | 52351  | hypothetical protein POPTR_0261s00200g [Populus trichocarpa]                  |
| 585 | 16940 | gi 566206623 | 129.7  | 15 | 8  | 2 | Carbamidomethylation                | 54072  | aldehyde dehydrogenase 1 precursor family protein [Populus trichocarpa]       |
| 982 | 16786 | gi 566208504 | 129.65 | 11 | 9  | 2 | Carbamidomethylation; Oxidation (M) | 128539 | hypothetical protein POPTR_0016s03630g [Populus trichocarpa]                  |
| 781 | 273   | gi 731411266 | 129.6  | 10 | 10 | 1 | Carbamidomethylation                | 134450 | PREDICTED: cullin-associated NEDD8-dissociated protein 1 [Vitis vinifera]     |
| 817 | 16828 | gi 224120474 | 129.4  | 13 | 12 | 2 | Carbamidomethylation                | 117667 | hypothetical protein POPTR_0012s03410g [Populus trichocarpa]                  |
| 509 | 460   | gi 359483716 | 129.38 | 23 | 6  | 2 |                                     | 29551  | PREDICTED: 14-3-3-like protein D isoform X2 [Vitis vinifera]                  |
| 305 | 16840 | gi 566158870 | 129.34 | 59 | 9  | 9 |                                     | 17678  | hypothetical protein POPTR_0002s19210g [Populus trichocarpa]                  |
| 122 | 453   | gi 225447576 | 129.31 | 31 | 6  | 1 | Carbamidomethylation                | 28468  | PREDICTED: chlorophyll a-b binding protein 151 chloroplastic [Vitis vinifera] |
| 497 | 602   | gi 359476682 | 128.91 | 24 | 7  | 1 | Carbamidomethylation                | 24349  | PREDICTED: soluble inorganic pyrophosphatase isoform X2 [Vitis vinifera]      |
| 242 | 17038 | gi 566174988 | 128.82 | 28 | 7  | 2 |                                     | 28378  | hypothetical protein POPTR_0006s07290g [Populus trichocarpa]                  |
| 771 | 400   | gi 731401656 | 128.7  | 35 | 7  | 7 | Carbamidomethylation                | 25978  | PREDICTED: proteasome subunit alpha type-5 [Vitis vinifera]                   |
| 381 | 379   | gi 225442192 | 128.67 | 32 | 7  | 3 |                                     | 21908  | PREDICTED: 60S ribosomal protein L9 [Vitis vinifera]                          |
| 705 | 17520 | gi 224104913 | 128.43 | 53 | 5  | 2 | Carbamidomethylation                | 12354  | 60S ribosomal protein L30 [Populus trichocarpa]                               |
| 239 | 17145 | gi 566159084 | 128.38 | 6  | 7  | 1 |                                     | 92938  | hypothetical protein POPTR_0002s20340g [Populus trichocarpa]                  |

|      |       |              |        |    |    |   |                                     |        |                                                                                                             |
|------|-------|--------------|--------|----|----|---|-------------------------------------|--------|-------------------------------------------------------------------------------------------------------------|
| 291  | 216   | gi 526117840 | 128.29 | 15 | 9  | 1 | Carbamidomethylation                | 58698  | 3-deoxy-D-arabino-heptulosonate-7-phosphate synthase [Vitis vinifera]                                       |
| 948  | 754   | gi 225428865 | 128.26 | 12 | 6  | 1 |                                     | 70683  | PREDICTED: polyadenylate-binding protein 2 [Vitis vinifera]                                                 |
| 621  | 341   | gi 731391907 | 128.03 | 14 | 7  | 5 | Carbamidomethylation                | 67493  | PREDICTED: anthranilate synthase alpha subunit 2 chloroplastic isoform X2 [Vitis vinifera]                  |
| 711  | 276   | gi 225432012 | 127.93 | 18 | 7  | 3 | Carbamidomethylation                | 54243  | PREDICTED: galactokinase [Vitis vinifera]                                                                   |
| 940  | 16946 | gi 224075980 | 127.89 | 8  | 7  | 1 | Carbamidomethylation                | 123548 | hypothetical protein POPTR_0003s21100g [Populus trichocarpa]                                                |
| 511  | 364   | gi 225451146 | 127.86 | 16 | 10 | 6 |                                     | 57701  | PREDICTED: bifunctional 3-dehydroquinate dehydratase/shikimate dehydrogenase chloroplastic [Vitis vinifera] |
| 407  | 301   | gi 225452510 | 127.79 | 13 | 8  | 2 | Carbamidomethylation                | 58057  | PREDICTED: aldehyde dehydrogenase family 2 member B7 mitochondrial [Vitis vinifera]                         |
| 537  | 16958 | gi 224099363 | 127.7  | 9  | 7  | 2 |                                     | 101194 | alpha-xylosidase family protein [Populus trichocarpa]                                                       |
| 673  | 390   | gi 225425838 | 127.4  | 31 | 7  | 2 | Carbamidomethylation                | 26900  | PREDICTED: adenylate kinase 4-like [Vitis vinifera]                                                         |
| 442  | 17021 | gi 224083020 | 127.29 | 47 | 8  | 2 | Carbamidomethylation; Oxidation (M) | 18138  | Peptidyl-prolyl cis-trans isomerase family protein [Populus trichocarpa]                                    |
| 195  | 361   | gi 225431804 | 127.11 | 27 | 6  | 1 |                                     | 24165  | PREDICTED: 60S ribosomal protein L19-2 [Vitis vinifera]                                                     |
| 589  | 16788 | gi 566171760 | 127.1  | 5  | 9  | 1 |                                     | 252377 | acetyl-CoA carboxylase family protein [Populus trichocarpa]                                                 |
| 1018 | 741   | gi 731399769 | 126.97 | 26 | 5  | 2 | Carbamidomethylation                | 30174  | PREDICTED: 2-Cys peroxiredoxin isoform X1 [Vitis vinifera]                                                  |
| 989  | 17036 | gi 224063997 | 126.86 | 12 | 6  | 2 |                                     | 67268  | NAD-dependent malic enzyme family protein [Populus trichocarpa]                                             |

|      |       |              |        |    |    |   |                                     |        |                                                                                   |
|------|-------|--------------|--------|----|----|---|-------------------------------------|--------|-----------------------------------------------------------------------------------|
| 365  | 16784 | gi 566175737 | 126.85 | 24 | 9  | 2 | Carbamidomethylation                | 47050  | Monodehydroascorbate reductase family protein [Populus trichocarpa]               |
| 494  | 17234 | gi 566207041 | 126.66 | 15 | 5  | 3 | Carbamidomethylation                | 53652  | glutamate 1-semialdehyde aminotransferase family protein [Populus trichocarpa]    |
| 653  | 428   | gi 225464279 | 126.57 | 12 | 11 | 1 | Carbamidomethylation                | 119705 | PREDICTED: protein argonaute 1 [Vitis vinifera]                                   |
| 1016 | 17054 | gi 566183505 | 126.52 | 15 | 6  | 1 | Carbamidomethylation                | 65372  | phosphatase family protein [Populus trichocarpa]                                  |
| 398  | 427   | gi 731399148 | 126.37 | 55 | 8  | 8 | Carbamidomethylation                | 14802  | PREDICTED: 40S ribosomal protein S15a [Vitis vinifera]                            |
| 937  | 311   | gi 225430390 | 126.3  | 14 | 7  | 3 | Carbamidomethylation                | 57260  | PREDICTED: threonine synthase chloroplastic [Vitis vinifera]                      |
| 721  | 441   | gi 225462272 | 126.25 | 28 | 6  | 1 |                                     | 31679  | PREDICTED: prohibitin-1 mitochondrial isoform X1 [Vitis vinifera]                 |
| 328  | 226   | gi 359497288 | 126.24 | 17 | 9  | 4 | Carbamidomethylation; Oxidation (M) | 64041  | PREDICTED: peptidyl-prolyl cis-trans isomerase FKBP62 isoform X1 [Vitis vinifera] |
| 882  | 325   | gi 225456051 | 125.69 | 20 | 10 | 3 | Carbamidomethylation                | 57589  | PREDICTED: T-complex protein 1 subunit delta [Vitis vinifera]                     |
| 780  | 16750 | gi 566160146 | 125.56 | 10 | 10 | 1 | Carbamidomethylation                | 134331 | TIP120 family protein [Populus trichocarpa]                                       |
| 368  | 17311 | gi 566254838 | 125.52 | 27 | 7  | 2 | Carbamidomethylation                | 28211  | hypothetical protein POPTR_0789s00200g [Populus trichocarpa]                      |
| 383  | 181   | gi 359476269 | 125.38 | 46 | 10 | 1 | Carbamidomethylation                | 26279  | PREDICTED: 40S ribosomal protein S3-3 [Vitis vinifera]                            |
| 913  | 457   | gi 225433588 | 125.38 | 10 | 7  | 4 | Carbamidomethylation                | 90882  | PREDICTED: probable methionine--tRNA ligase [Vitis vinifera]                      |
| 816  | 17246 | gi 566190515 | 125.03 | 17 | 5  | 3 | Carbamidomethylation                | 42536  | hypothetical protein POPTR_0010s12790g [Populus trichocarpa]                      |
| 175  | 16867 | gi 566147823 | 124.83 | 14 | 9  | 4 | Carbamidomethylation; Oxidation (M) | 83349  | hypothetical protein POPTR_0001s07870g [Populus trichocarpa]                      |

|      |       |              |        |    |    |    |                      |        |                                                                                                |
|------|-------|--------------|--------|----|----|----|----------------------|--------|------------------------------------------------------------------------------------------------|
| 324  | 16841 | gi 669099987 | 124.72 | 12 | 11 | 10 | Carbamidomethylation | 83116  | photosystem I P700 chlorophyll A apoprotein A1 (chloroplast) [Camellia crapnelliana]           |
| 616  | 16955 | gi 566202195 | 124.5  | 27 | 7  | 7  |                      | 34821  | hypothetical protein POPTR_0014s03240g [Populus trichocarpa]                                   |
| 500  | 627   | gi 225464720 | 124.35 | 17 | 6  | 2  | Carbamidomethylation | 44946  | PREDICTED: oxygen-dependent coproporphyrinogen-III oxidase chloroplastic-like [Vitis vinifera] |
| 658  | 293   | gi 225455784 | 124.32 | 22 | 8  | 6  | Carbamidomethylation | 50558  | PREDICTED: enolase 1 chloroplastic [Vitis vinifera]                                            |
| 1010 | 16991 | gi 566196314 | 124.06 | 4  | 6  | 1  | Carbamidomethylation | 244200 | NADH-dependent glutamate synthase family protein [Populus trichocarpa]                         |
| 631  | 17258 | gi 224140177 | 123.98 | 12 | 7  | 3  | Carbamidomethylation | 53698  | adenylosuccinate synthetase family protein [Populus trichocarpa]                               |
| 664  | 413   | gi 225457075 | 123.67 | 16 | 7  | 1  | Carbamidomethylation | 58613  | PREDICTED: aldehyde dehydrogenase family 2 member B4 mitochondrial [Vitis vinifera]            |
| 785  | 572   | gi 731382516 | 123.65 | 17 | 5  | 5  | Carbamidomethylation | 37912  | PREDICTED: ankyrin repeat domain-containing protein 2 isoform X2 [Vitis vinifera]              |
| 397  | 618   | gi 225464412 | 123.6  | 35 | 7  | 7  |                      | 16188  | PREDICTED: 40S ribosomal protein S17 [Vitis vinifera]                                          |
| 911  | 17183 | gi 224098004 | 123.58 | 14 | 6  | 1  | Carbamidomethylation | 47073  | 19S proteasome subunit 9 family protein [Populus trichocarpa]                                  |
| 514  | 316   | gi 359480881 | 123.51 | 10 | 6  | 6  | Carbamidomethylation | 94936  | PREDICTED: beta-galactosidase 10 [Vitis vinifera]                                              |
| 498  | 269   | gi 359476642 | 123.44 | 19 | 7  | 1  | Carbamidomethylation | 42804  | PREDICTED: fructose-bisphosphate aldolase 1 chloroplastic-like [Vitis vinifera]                |
| 1158 | 17457 | gi 224129210 | 123.31 | 14 | 4  | 2  | Carbamidomethylation | 41121  | truncated acetyl Co-A acetyltransferase-like family protein [Populus trichocarpa]              |
| 535  | 481   | gi 225442079 | 123.15 | 33 | 8  | 8  | Carbamidomethylation | 27325  | PREDICTED: proteasome subunit alpha type-6 [Vitis vinifera]                                    |
| 312  | 17348 | gi 566184073 | 123.13 | 25 | 6  | 6  | Carbamidomethylation | 22518  | photosystem I 20kD family protein [Populus trichocarpa]                                        |



|      |       |              |        |    |    |   |                      |        |                                                                                        |
|------|-------|--------------|--------|----|----|---|----------------------|--------|----------------------------------------------------------------------------------------|
| 660  | 538   | gi 225439982 | 123.12 | 53 | 7  | 7 | Carbamidomethylation | 17793  | PREDICTED: 60S ribosomal protein L12 [Vitis vinifera]                                  |
| 176  | 17140 | gi 224075758 | 123.08 | 51 | 7  | 1 | Carbamidomethylation | 15268  | hypothetical protein POPTR_0003s22120g [Populus trichocarpa]                           |
| 811  | 326   | gi 359492510 | 123.08 | 19 | 8  | 1 | Carbamidomethylation | 41451  | PREDICTED: probable L-ascorbate peroxidase 6 chloroplastic isoform X2 [Vitis vinifera] |
| 832  | 16895 | gi 566191895 | 123.01 | 8  | 7  | 3 | Carbamidomethylation | 154710 | phosphoribosylformylglycinamide synthase family protein [Populus trichocarpa]          |
| 549  | 16779 | gi 566175799 | 123.01 | 20 | 10 | 2 | Carbamidomethylation | 57465  | pyruvate kinase family protein [Populus trichocarpa]                                   |
| 777  | 16892 | gi 224143423 | 122.99 | 10 | 9  | 2 | Carbamidomethylation | 105985 | putative coatmer beta subunit family protein [Populus trichocarpa]                     |
| 586  | 728   | gi 359485890 | 122.96 | 7  | 6  | 2 | Carbamidomethylation | 83365  | PREDICTED: beta-xylosidase/alpha-L-arabinofuranosidase 2-like [Vitis vinifera]         |
| 715  | 454   | gi 225449132 | 122.87 | 32 | 7  | 1 |                      | 19768  | PREDICTED: ATP synthase subunit d mitochondrial [Vitis vinifera]                       |
| 1028 | 17343 | gi 224068388 | 122.85 | 13 | 4  | 1 |                      | 53197  | Fumarate hydratase 1 family protein [Populus trichocarpa]                              |
| 434  | 17013 | gi 566164286 | 122.83 | 15 | 7  | 2 | Carbamidomethylation | 44313  | T-protein of the glycine decarboxylase complex [Populus trichocarpa]                   |
| 680  | 431   | gi 731391105 | 122.79 | 15 | 8  | 4 | Carbamidomethylation | 49499  | PREDICTED: calreticulin-3-like [Vitis vinifera]                                        |
| 464  | 547   | gi 225456295 | 122.06 | 18 | 5  | 4 |                      | 24961  | PREDICTED: elongation factor 1-delta [Vitis vinifera]                                  |
| 838  | 445   | gi 225454087 | 121.97 | 11 | 6  | 2 |                      | 66696  | PREDICTED: NAD-dependent malic enzyme 59 kDa isoform mitochondrial [Vitis vinifera]    |
| 677  | 473   | gi 225436253 | 121.96 | 13 | 7  | 1 | Carbamidomethylation | 66904  | PREDICTED: probable methylenetetrahydrofolate reductase [Vitis vinifera]               |

|      |       |              |        |    |   |   |                                        |        |                                                                                           |
|------|-------|--------------|--------|----|---|---|----------------------------------------|--------|-------------------------------------------------------------------------------------------|
| 789  | 17259 | gi 566170121 | 121.83 | 13 | 5 | 2 | Carbamidomethylation                   | 56464  | 1L-myo-inositol 1-phosphate synthase family protein [ <i>Populus trichocarpa</i> ]        |
| 438  | 251   | gi 225461654 | 121.71 | 26 | 7 | 2 |                                        | 28864  | PREDICTED: 14-3-3-like protein D [ <i>Vitis vinifera</i> ]                                |
| 317  | 17341 | gi 566238007 | 121.68 | 20 | 6 | 1 | Carbamidomethylation                   | 30925  | Chlorophyll a-b binding protein CP26 [ <i>Populus trichocarpa</i> ]                       |
| 698  | 558   | gi 225437493 | 121.53 | 12 | 5 | 1 | Carbamidomethylation                   | 58594  | PREDICTED: importin subunit alpha [ <i>Vitis vinifera</i> ]                               |
| 323  | 17040 | gi 566184599 | 121.43 | 17 | 8 | 2 |                                        | 37085  | glyceraldehyde 3-phosphate dehydrogenase family protein [ <i>Populus trichocarpa</i> ]    |
| 583  | 626   | gi 225449078 | 121.28 | 25 | 6 | 1 | Carbamidomethylation;<br>Oxidation (M) | 26327  | PREDICTED: chlorophyll a-b binding protein 6 chloroplastic [ <i>Vitis vinifera</i> ]      |
| 410  | 487   | gi 225433247 | 121.26 | 42 | 5 | 5 | Carbamidomethylation                   | 15031  | PREDICTED: 60S ribosomal protein L23 [ <i>Vitis vinifera</i> ]                            |
| 802  | 697   | gi 731423169 | 121.02 | 35 | 6 | 6 | Carbamidomethylation                   | 13646  | PREDICTED: 40S ribosomal protein S20-2 [ <i>Vitis vinifera</i> ]                          |
| 1020 | 16907 | gi 566174304 | 120.78 | 6  | 8 | 1 | Carbamidomethylation                   | 177274 | ferredoxin-dependent glutamate synthase family protein [ <i>Populus trichocarpa</i> ]     |
| 1208 | 17327 | gi 224086948 | 120.44 | 16 | 5 | 2 | Carbamidomethylation                   | 51291  | eukaryotic translation initiation factor 3E family protein [ <i>Populus trichocarpa</i> ] |
| 667  | 16922 | gi 224058615 | 120.43 | 27 | 7 | 3 | Carbamidomethylation                   | 33817  | hypothetical protein POPTR_0001s08570g [ <i>Populus trichocarpa</i> ]                     |
| 670  | 17027 | gi 566195881 | 120.27 | 20 | 7 | 1 | Carbamidomethylation                   | 44659  | hypothetical protein POPTR_0011s16690g [ <i>Populus trichocarpa</i> ]                     |
| 676  | 639   | gi 731428049 | 120.18 | 11 | 4 | 2 | Carbamidomethylation                   | 47334  | PREDICTED: delta-aminolevulinic acid dehydratase chloroplastic [ <i>Vitis vinifera</i> ]  |
| 578  | 17069 | gi 224077927 | 120    | 16 | 6 | 1 | Carbamidomethylation                   | 42796  | latex plastidic aldolase-like family protein [ <i>Populus trichocarpa</i> ]               |
| 815  | 391   | gi 225425280 | 119.8  | 16 | 7 | 2 |                                        | 48103  | PREDICTED: uncharacterized protein LOC100247241 [ <i>Vitis vinifera</i> ]                 |

|      |       |              |        |    |    |   |                                     |        |                                                                                  |
|------|-------|--------------|--------|----|----|---|-------------------------------------|--------|----------------------------------------------------------------------------------|
| 633  | 927   | gi 731440185 | 119.51 | 13 | 5  | 2 |                                     | 30189  | PREDICTED: 60S ribosomal protein L5-like [Vitis vinifera]                        |
| 897  | 1124  | gi 731392283 | 119.46 | 18 | 6  | 1 | Carbamidomethylation                | 38986  | PREDICTED: UDP-glucuronic acid decarboxylase 6 [Vitis vinifera]                  |
| 993  | 818   | gi 731396254 | 119.37 | 13 | 5  | 4 | Carbamidomethylation                | 40707  | PREDICTED: alcohol dehydrogenase class-3 [Vitis vinifera]                        |
| 615  | 17819 | gi 224131818 | 119.26 | 24 | 4  | 1 |                                     | 28513  | chlorophyll a/b-binding family protein [Populus trichocarpa]                     |
| 806  | 648   | gi 731424733 | 119.16 | 4  | 6  | 1 | Carbamidomethylation                | 241380 | PREDICTED: glutamate synthase 1 [NADH] chloroplastic isoform X2 [Vitis vinifera] |
| 1030 | 520   | gi 225431090 | 119.12 | 34 | 6  | 6 |                                     | 27195  | PREDICTED: proteasome subunit alpha type-7 [Vitis vinifera]                      |
| 357  | 16803 | gi 224089867 | 118.98 | 9  | 10 | 1 | Carbamidomethylation                | 103746 | hypothetical protein POPTR_0006s02680g [Populus trichocarpa]                     |
| 843  | 16957 | gi 224075445 | 118.95 | 15 | 7  | 2 | Carbamidomethylation                | 47494  | transaldolase family protein [Populus trichocarpa]                               |
| 341  | 16818 | gi 224135747 | 118.77 | 36 | 9  | 1 | Carbamidomethylation                | 26076  | 40S ribosomal protein S3 [Populus trichocarpa]                                   |
| 1039 | 16938 | gi 224145979 | 118.63 | 16 | 7  | 1 | Carbamidomethylation                | 58735  | hypothetical protein POPTR_0019s04980g [Populus trichocarpa]                     |
| 729  | 336   | gi 225429870 | 118.62 | 14 | 8  | 8 | Carbamidomethylation                | 60861  | PREDICTED: aspartate--tRNA ligase cytoplasmic [Vitis vinifera]                   |
| 885  | 571   | gi 225441589 | 118.38 | 6  | 6  | 1 | Carbamidomethylation                | 123527 | PREDICTED: importin-5 [Vitis vinifera]                                           |
| 763  | 17190 | gi 224114826 | 118.32 | 39 | 5  | 1 | Carbamidomethylation                | 17193  | ubiquitin-conjugating enzyme family protein [Populus trichocarpa]                |
| 460  | 235   | gi 225444782 | 118.32 | 34 | 8  | 1 | Carbamidomethylation                | 26314  | PREDICTED: 40S ribosomal protein S3-3 [Vitis vinifera]                           |
| 833  | 16827 | gi 566182445 | 118.18 | 11 | 8  | 2 | Carbamidomethylation; Oxidation (M) | 115769 | 2-oxoglutarate dehydrogenase E1 component family protein [Populus trichocarpa]   |
| 463  | 17207 | gi 566151109 | 118.1  | 18 | 7  | 1 |                                     | 37403  | hypothetical protein POPTR_0001s26400g [Populus trichocarpa]                     |

|      |       |              |        |    |   |   |                      |       |                                                                              |
|------|-------|--------------|--------|----|---|---|----------------------|-------|------------------------------------------------------------------------------|
| 818  | 16835 | gi 224082111 | 117.99 | 35 | 9 | 8 | Carbamidomethylation | 28421 | hypothetical protein POPTR_0005s17280g [Populus trichocarpa]                 |
| 385  | 412   | gi 225443760 | 117.95 | 29 | 7 | 1 | Carbamidomethylation | 20875 | PREDICTED: 60S ribosomal protein L11-1-like [Vitis vinifera]                 |
| 740  | 831   | gi 225456392 | 117.8  | 16 | 5 | 1 | Carbamidomethylation | 29387 | PREDICTED: 60S ribosomal protein L7a [Vitis vinifera]                        |
| 893  | 320   | gi 225441629 | 117.7  | 15 | 7 | 1 | Carbamidomethylation | 58891 | PREDICTED: T-complex protein 1 subunit theta [Vitis vinifera]                |
| 476  | 389   | gi 225441754 | 117.56 | 12 | 7 | 3 |                      | 53382 | PREDICTED: adenylosuccinate synthetase 2 chloroplastic [Vitis vinifera]      |
| 1014 | 611   | gi 225437455 | 117.38 | 11 | 4 | 2 |                      | 53532 | PREDICTED: fumarate hydratase 1 mitochondrial [Vitis vinifera]               |
| 522  | 17062 | gi 224090212 | 117.14 | 23 | 7 | 2 | Carbamidomethylation | 29609 | 40S ribosomal protein S2 [Populus trichocarpa]                               |
| 696  | 519   | gi 225450981 | 117.13 | 17 | 7 | 7 | Carbamidomethylation | 51125 | PREDICTED: serine--tRNA ligase [Vitis vinifera]                              |
| 539  | 17042 | gi 566164883 | 117.09 | 20 | 8 | 2 | Carbamidomethylation | 43246 | ketol-acid reductoisomerase family protein partial [Populus trichocarpa]     |
| 1109 | 1010  | gi 225451999 | 117.06 | 13 | 6 | 6 |                      | 59112 | PREDICTED: T-complex protein 1 subunit zeta [Vitis vinifera]                 |
| 753  | 17243 | gi 224100839 | 117.03 | 30 | 7 | 1 |                      | 19919 | ATP synthase D chain-related family protein [Populus trichocarpa]            |
| 632  | 692   | gi 731388721 | 116.88 | 25 | 5 | 3 |                      | 18965 | PREDICTED: translationally-controlled tumor protein homolog [Vitis vinifera] |
| 976  | 17094 | gi 224065699 | 116.83 | 12 | 6 | 6 | Carbamidomethylation | 75559 | Cell division protein ftsH [Populus trichocarpa]                             |
| 452  | 369   | gi 359492927 | 116.54 | 27 | 6 | 2 |                      | 28650 | PREDICTED: 14-3-3-like protein GF14 kappa [Vitis vinifera]                   |
| 1034 | 17453 | gi 224088276 | 116.41 | 11 | 4 | 1 | Carbamidomethylation | 50030 | leucine aminopeptidase family protein [Populus trichocarpa]                  |
| 618  | 17126 | gi 224141487 | 116.19 | 13 | 7 | 1 | Carbamidomethylation | 52967 | UDP-glucose 6-dehydrogenase family protein [Populus trichocarpa]             |

|      |       |              |        |    |   |   |                                     |        |                                                                                                |
|------|-------|--------------|--------|----|---|---|-------------------------------------|--------|------------------------------------------------------------------------------------------------|
| 965  | 17353 | gi 224142207 | 116.03 | 9  | 4 | 2 | Carbamidomethylation                | 65147  | hypothetical protein POPTR_0018s09380g [Populus trichocarpa]                                   |
| 695  | 619   | gi 225453250 | 115.98 | 8  | 4 | 4 |                                     | 69341  | PREDICTED: NAD-dependent malic enzyme 62 kDa isoform mitochondrial isoform X2 [Vitis vinifera] |
| 857  | 637   | gi 225431563 | 115.9  | 12 | 6 | 1 | Carbamidomethylation                | 51250  | PREDICTED: UTP--glucose-1-phosphate uridylyltransferase isoform X1 [Vitis vinifera]            |
| 784  | 17223 | gi 224139104 | 115.77 | 16 | 6 | 6 | Carbamidomethylation                | 33044  | pyridoxin biosynthesis PDX1-like protein 3 [Populus trichocarpa]                               |
| 1049 | 398   | gi 731405921 | 115.77 | 21 | 6 | 6 | Carbamidomethylation                | 34871  | PREDICTED: phytochrome-associated serine/threonine-protein phosphatase [Vitis vinifera]        |
| 910  | 17018 | gi 566148676 | 115.74 | 11 | 7 | 1 | Carbamidomethylation                | 77001  | Glycyl-tRNA synthetase family protein [Populus trichocarpa]                                    |
| 1059 | 699   | gi 225435309 | 115.66 | 9  | 6 | 2 | Carbamidomethylation                | 82345  | PREDICTED: 4-hydroxy-3-methylbut-2-en-1-yl diphosphate synthase chloroplastic [Vitis vinifera] |
| 823  | 964   | gi 225438529 | 115.52 | 27 | 7 | 6 |                                     | 27683  | PREDICTED: probable ATP synthase 24 kDa subunit mitochondrial [Vitis vinifera]                 |
| 119  | 859   | gi 225429614 | 115.48 | 26 | 4 | 4 | Oxidation (M)                       | 17293  | PREDICTED: 17.3 kDa class II heat shock protein [Vitis vinifera]                               |
| 768  | 17070 | gi 224064707 | 115.42 | 11 | 6 | 3 | Carbamidomethylation                | 58836  | mitochondrial aldehyde dehydrogenase family protein [Populus trichocarpa]                      |
| 534  | 17014 | gi 224140653 | 115.39 | 14 | 7 | 3 | Carbamidomethylation; Oxidation (M) | 61182  | phosphoglycerate mutase family protein [Populus trichocarpa]                                   |
| 345  | 17005 | gi 566146555 | 115.29 | 35 | 8 | 3 |                                     | 23812  | 60S ribosomal protein L13 [Populus trichocarpa]                                                |
| 1012 | 471   | gi 225433575 | 115.24 | 7  | 5 | 4 | Carbamidomethylation                | 105215 | PREDICTED: probable glucan 1 3-alpha-glucosidase [Vitis vinifera]                              |

|      |       |              |        |    |   |   |                      |        |                                                                                                                |
|------|-------|--------------|--------|----|---|---|----------------------|--------|----------------------------------------------------------------------------------------------------------------|
| 755  | 466   | gi 225426743 | 115.15 | 23 | 6 | 1 | Carbamidomethylation | 33675  | PREDICTED: bifunctional dTDP-4-dehydrorhamnose 3 5-epimerase/dTDP-4-dehydrorhamnose reductase [Vitis vinifera] |
| 1170 | 597   | gi 225441924 | 115.1  | 13 | 4 | 1 | Carbamidomethylation | 51126  | PREDICTED: eukaryotic translation initiation factor 3 subunit E [Vitis vinifera]                               |
| 218  | 18507 | gi 566242200 | 115.02 | 14 | 5 | 3 |                      | 19093  | hypothetical protein POPTR_0019s12370g partial [Populus trichocarpa]                                           |
| 790  | 17298 | gi 224063082 | 114.94 | 22 | 5 | 5 |                      | 28992  | Photosystem II 22 kDa family protein [Populus trichocarpa]                                                     |
| 748  | 727   | gi 225464809 | 114.82 | 13 | 6 | 3 | Carbamidomethylation | 56995  | PREDICTED: gamma aminobutyrate transaminase 1 mitochondrial-like [Vitis vinifera]                              |
| 734  | 16882 | gi 224053613 | 114.71 | 19 | 8 | 8 | Carbamidomethylation | 49072  | Eukaryotic peptide chain release factor subunit 1-2 family protein [Populus trichocarpa]                       |
| 1121 | 17015 | gi 224129596 | 114.69 | 19 | 7 | 1 | Carbamidomethylation | 45020  | Succinyl-CoA ligase beta-chain family protein [Populus trichocarpa]                                            |
| 473  | 17412 | gi 566189935 | 114.69 | 14 | 5 | 1 | Carbamidomethylation | 29602  | ribosomal protein S3a [Populus trichocarpa]                                                                    |
| 950  | 508   | gi 731432625 | 114.68 | 5  | 5 | 1 | Carbamidomethylation | 121307 | PREDICTED: protein transport protein Sec24-like At4g32640 [Vitis vinifera]                                     |
| 412  | 774   | gi 225444063 | 114.67 | 16 | 7 | 2 | Carbamidomethylation | 44423  | PREDICTED: obg-like ATPase 1 [Vitis vinifera]                                                                  |
| 738  | 651   | gi 225434329 | 114.62 | 16 | 8 | 1 |                      | 57685  | PREDICTED: trans-cinnamate 4-monooxygenase [Vitis vinifera]                                                    |
| 376  | 17083 | gi 224091827 | 114.61 | 29 | 7 | 1 | Carbamidomethylation | 20659  | 60S ribosomal protein L11-2 [Populus trichocarpa]                                                              |
| 439  | 642   | gi 225432758 | 114.56 | 18 | 6 | 2 | Carbamidomethylation | 29774  | PREDICTED: 40S ribosomal protein S3a-1 [Vitis vinifera]                                                        |
| 887  | 17046 | gi 224085984 | 114.53 | 11 | 6 | 1 | Carbamidomethylation | 61382  | multi-copper oxidase type 1 family protein [Populus trichocarpa]                                               |
| 828  | 17528 | gi 566162704 | 114.3  | 32 | 4 | 2 | Carbamidomethylation | 18629  | hypothetical protein POPTR_0003s14870g [Populus trichocarpa]                                                   |

|      |       |              |        |    |   |   |                      |        |                                                                                                 |
|------|-------|--------------|--------|----|---|---|----------------------|--------|-------------------------------------------------------------------------------------------------|
| 697  | 17210 | gi 224136368 | 114.28 | 6  | 6 | 1 |                      | 107885 | 110 kDa 4SNc-Tudor domain family protein [Populus trichocarpa]                                  |
| 628  | 357   | gi 731399677 | 114.2  | 9  | 9 | 1 | Carbamidomethylation | 102437 | PREDICTED: protein argonaute 4A-like [Vitis vinifera]                                           |
| 308  | 669   | gi 731386337 | 114.05 | 23 | 5 | 4 | Carbamidomethylation | 20640  | PREDICTED: serine/arginine-rich splicing factor RSZ22 isoform X2 [Vitis vinifera]               |
| 962  | 600   | gi 359490767 | 113.85 | 24 | 4 | 1 |                      | 23070  | PREDICTED: nascent polypeptide-associated complex subunit alpha-like protein 2 [Vitis vinifera] |
| 746  | 17008 | gi 566186274 | 113.77 | 25 | 7 | 2 | Carbamidomethylation | 29153  | proliferating cell nuclear antigen family protein [Populus trichocarpa]                         |
| 523  | 380   | gi 225459292 | 113.74 | 26 | 7 | 3 |                      | 28739  | PREDICTED: 14-3-3 protein 7 [Vitis vinifera]                                                    |
| 692  | 592   | gi 225437537 | 113.69 | 34 | 6 | 6 |                      | 22019  | PREDICTED: GTP-binding protein SAR1A [Vitis vinifera]                                           |
| 1156 | 17405 | gi 566183896 | 113.61 | 15 | 4 | 1 | Carbamidomethylation | 35738  | TGF-beta receptor-interacting protein 1 [Populus trichocarpa]                                   |
| 1027 | 691   | gi 731397286 | 113.5  | 10 | 5 | 1 | Carbamidomethylation | 56371  | PREDICTED: inositol-3-phosphate synthase [Vitis vinifera]                                       |
| 1070 | 17433 | gi 566214954 | 113.5  | 13 | 4 | 3 | Carbamidomethylation | 39277  | hypothetical protein POPTR_0018s09170g [Populus trichocarpa]                                    |
| 961  | 1208  | gi 225424530 | 113.17 | 15 | 4 | 1 |                      | 36021  | PREDICTED: eukaryotic translation initiation factor 3 subunit I [Vitis vinifera]                |
| 947  | 16960 | gi 566211039 | 113.14 | 6  | 6 | 6 |                      | 124467 | DegP protease family protein [Populus trichocarpa]                                              |
| 766  | 17148 | gi 224054150 | 113.1  | 22 | 6 | 5 | Carbamidomethylation | 38004  | transducin family protein [Populus trichocarpa]                                                 |
| 912  | 628   | gi 225435754 | 112.87 | 8  | 7 | 2 | Carbamidomethylation | 123396 | PREDICTED: importin-5 [Vitis vinifera]                                                          |
| 687  | 424   | gi 225428772 | 112.8  | 7  | 7 | 2 |                      | 121098 | PREDICTED: presequence protease 2 chloroplastic/mitochondrial-like [Vitis vinifera]             |

|      |       |              |        |    |   |   |                                     |        |                                                                                      |
|------|-------|--------------|--------|----|---|---|-------------------------------------|--------|--------------------------------------------------------------------------------------|
| 510  | 17173 | gi 566149424 | 112.78 | 16 | 6 | 6 | Oxidation (M)                       | 46427  | oligouridylate-binding family protein [Populus trichocarpa]                          |
| 435  | 17211 | gi 224135485 | 112.71 | 11 | 6 | 2 | Carbamidomethylation                | 58870  | glycosyl hydrolase family 1 family protein [Populus trichocarpa]                     |
| 779  | 17297 | gi 224141065 | 112.65 | 10 | 5 | 1 |                                     | 58604  | mitochondrial processing peptidase beta subunit family protein [Populus trichocarpa] |
| 1088 | 17535 | gi 566180192 | 112.63 | 23 | 4 | 4 |                                     | 27792  | hypothetical protein POPTR_0007s08020g [Populus trichocarpa]                         |
| 1108 | 438   | gi 225425318 | 112.47 | 7  | 6 | 1 |                                     | 108282 | PREDICTED: DNA replication licensing factor MCM2 [Vitis vinifera]                    |
| 1072 | 935   | gi 225462922 | 112.34 | 14 | 5 | 1 | Carbamidomethylation                | 46982  | PREDICTED: 26S proteasome non-ATPase regulatory subunit 11 homolog [Vitis vinifera]  |
| 582  | 1727  | gi 225465837 | 112.31 | 6  | 5 | 3 | Carbamidomethylation                | 46787  | PREDICTED: protein ASPARTIC PROTEASE IN GUARD CELL 2 [Vitis vinifera]                |
| 968  | 17512 | gi 566158761 | 112.3  | 22 | 6 | 2 | Carbamidomethylation; Oxidation (M) | 29101  | cyclophilin family protein [Populus trichocarpa]                                     |
| 939  | 529   | gi 731399749 | 112.2  | 18 | 5 | 5 | Carbamidomethylation                | 44581  | PREDICTED: GDHB glutamate dehydrogenase isoform X1 [Vitis vinifera]                  |
| 853  | 773   | gi 225440478 | 112.12 | 15 | 3 | 2 | Carbamidomethylation                | 35390  | PREDICTED: aldo-keto reductase family 4 member C9-like [Vitis vinifera]              |
| 469  | 17131 | gi 224057882 | 111.83 | 10 | 7 | 1 |                                     | 89495  | outer membrane family protein [Populus trichocarpa]                                  |
| 760  | 458   | gi 359475502 | 111.59 | 18 | 5 | 1 | Carbamidomethylation                | 37652  | PREDICTED: malate dehydrogenase glyoxysomal [Vitis vinifera]                         |
| 797  | 664   | gi 731403303 | 111.55 | 32 | 4 | 2 | Carbamidomethylation                | 15026  | PREDICTED: 40S ribosomal protein S12 [Vitis vinifera]                                |
| 367  | 17233 | gi 224065421 | 111.46 | 9  | 5 | 1 |                                     | 64078  | hypothetical protein POPTR_0002s24970g [Populus trichocarpa]                         |



|      |       |              |        |    |   |   |                      |        |                                                                                                                     |
|------|-------|--------------|--------|----|---|---|----------------------|--------|---------------------------------------------------------------------------------------------------------------------|
| 1033 | 17416 | gi 671741939 | 111.45 | 14 | 5 | 5 |                      | 56223  | acetyl-CoA carboxylase<br>carboxyltransferase beta subunit<br>(chloroplast) [ <i>Camellia<br/>grandibracteata</i> ] |
| 1199 | 17016 | gi 566148627 | 111.4  | 7  | 6 | 1 | Carbamidomethylation | 107277 | hypothetical protein<br>POPTR_0001s12700g [ <i>Populus<br/>trichocarpa</i> ]                                        |
| 967  | 17498 | gi 566160463 | 111.33 | 14 | 4 | 4 |                      | 49456  | hypothetical protein<br>POPTR_0003s02420g [ <i>Populus<br/>trichocarpa</i> ]                                        |
| 505  | 882   | gi 225449292 | 111.19 | 23 | 6 | 1 | Oxidation (M)        | 17090  | PREDICTED: 18.2 kDa class I<br>heat shock protein [ <i>Vitis vinifera</i> ]                                         |
| 747  | 1030  | gi 225453246 | 111.1  | 9  | 4 | 2 |                      | 69276  | PREDICTED: dynamin-related<br>protein 1E [ <i>Vitis vinifera</i> ]                                                  |
| 350  | 17618 | gi 224102515 | 110.95 | 16 | 5 | 4 |                      | 29608  | porin family protein [ <i>Populus<br/>trichocarpa</i> ]                                                             |
| 867  | 17635 | gi 224092266 | 110.92 | 8  | 4 | 1 | Carbamidomethylation | 63096  | hypothetical protein<br>POPTR_0006s25280g [ <i>Populus<br/>trichocarpa</i> ]                                        |
| 241  | 446   | gi 225465463 | 110.88 | 32 | 7 | 1 | Carbamidomethylation | 23516  | PREDICTED: 60S ribosomal<br>protein L13a-4 [ <i>Vitis vinifera</i> ]                                                |
| 1040 | 1597  | gi 526118004 | 110.86 | 13 | 5 | 5 |                      | 47748  | probable E3 ubiquitin-protein<br>ligase HERC1-like [ <i>Vitis vinifera</i> ]                                        |
| 730  | 16961 | gi 566166593 | 110.79 | 6  | 7 | 2 |                      | 122467 | hypothetical protein<br>POPTR_0004s14960g [ <i>Populus<br/>trichocarpa</i> ]                                        |
| 936  | 731   | gi 225449971 | 110.69 | 5  | 5 | 3 | Carbamidomethylation | 121958 | PREDICTED: protein transport<br>protein SEC31 homolog B isoform<br>X2 [ <i>Vitis vinifera</i> ]                     |
| 1110 | 17066 | gi 566167939 | 110.68 | 9  | 6 | 2 |                      | 84308  | hypothetical protein<br>POPTR_0004s22010g [ <i>Populus<br/>trichocarpa</i> ]                                        |
| 920  | 499   | gi 731416612 | 110.64 | 13 | 6 | 6 |                      | 63619  | PREDICTED: probable nucleolar<br>protein 5-2 [ <i>Vitis vinifera</i> ]                                              |
| 532  | 17587 | gi 566184208 | 110.56 | 16 | 4 | 4 | Carbamidomethylation | 27210  | hypothetical protein<br>POPTR_0008s15820g [ <i>Populus<br/>trichocarpa</i> ]                                        |
| 1061 | 17255 | gi 566259528 | 110.47 | 5  | 5 | 1 | Carbamidomethylation | 119647 | transport Sec24 family protein<br>[ <i>Populus trichocarpa</i> ]                                                    |

|      |       |              |        |    |   |   |                                     |        |                                                                                  |
|------|-------|--------------|--------|----|---|---|-------------------------------------|--------|----------------------------------------------------------------------------------|
| 971  | 17256 | gi 224125002 | 110.44 | 9  | 4 | 3 | Carbamidomethylation                | 59410  | importin alpha-1 subunit family protein [Populus trichocarpa]                    |
| 389  | 376   | gi 526117723 | 110.38 | 14 | 6 | 1 | Carbamidomethylation                | 56980  | catalase [Vitis vinifera]                                                        |
| 820  | 17516 | gi 224061539 | 110.25 | 23 | 5 | 1 |                                     | 21920  | hypothetical protein POPTR_0001s45810g [Populus trichocarpa]                     |
| 742  | 743   | gi 359482848 | 110.24 | 10 | 4 | 1 |                                     | 43630  | PREDICTED: nucleosome assembly protein 1;4 [Vitis vinifera]                      |
| 1371 | 17442 | gi 566152994 | 110.09 | 11 | 5 | 2 | Carbamidomethylation                | 57135  | hypothetical protein POPTR_0001s35790g [Populus trichocarpa]                     |
| 990  | 17452 | gi 566147835 | 109.9  | 19 | 4 | 3 |                                     | 26392  | hypothetical protein POPTR_0001s07920g partial [Populus trichocarpa]             |
| 972  | 758   | gi 225430549 | 109.72 | 8  | 4 | 2 | Carbamidomethylation                | 82761  | PREDICTED: eukaryotic translation initiation factor 3 subunit B [Vitis vinifera] |
| 942  | 17188 | gi 224101523 | 109.58 | 11 | 5 | 1 | Carbamidomethylation                | 54092  | Galactokinase family protein [Populus trichocarpa]                               |
| 597  | 633   | gi 225444649 | 109.57 | 16 | 4 | 4 |                                     | 26396  | PREDICTED: 20 kDa chaperonin chloroplastic [Vitis vinifera]                      |
| 862  | 490   | gi 225446595 | 109.53 | 33 | 5 | 1 | Carbamidomethylation                | 17220  | PREDICTED: ubiquitin-conjugating enzyme E2 36 [Vitis vinifera]                   |
| 97   | 410   | gi 359475042 | 109.45 | 25 | 6 | 1 | Carbamidomethylation; Oxidation (M) | 18313  | PREDICTED: peptidyl-prolyl cis-trans isomerase [Vitis vinifera]                  |
| 153  | 17575 | gi 566170929 | 109.14 | 12 | 4 | 1 | Carbamidomethylation                | 36394  | hypothetical protein POPTR_0005s12070g [Populus trichocarpa]                     |
| 558  | 17266 | gi 224104631 | 109    | 18 | 5 | 1 |                                     | 27319  | cytosolic ascorbate peroxidase family protein [Populus trichocarpa]              |
| 1026 | 590   | gi 225424316 | 108.89 | 12 | 5 | 2 | Carbamidomethylation                | 63641  | PREDICTED: phosphoglucomutase cytoplasmic [Vitis vinifera]                       |
| 1204 | 17396 | gi 224119992 | 108.89 | 4  | 4 | 2 | Carbamidomethylation                | 143158 | hypothetical protein POPTR_0012s13100g [Populus trichocarpa]                     |

|      |       |              |        |    |   |   |                      |        |                                                                                                              |
|------|-------|--------------|--------|----|---|---|----------------------|--------|--------------------------------------------------------------------------------------------------------------|
| 1022 | 720   | gi 359476926 | 108.83 | 18 | 3 | 1 | Carbamidomethylation | 18454  | PREDICTED: photosystem I reaction center subunit N chloroplastic [Vitis vinifera]                            |
| 1405 | 735   | gi 225455902 | 108.8  | 13 | 5 | 1 | Carbamidomethylation | 65334  | PREDICTED: serine/threonine-protein phosphatase 2A 65 kDa regulatory subunit A beta isoform [Vitis vinifera] |
| 248  | 17149 | gi 224081102 | 108.68 | 51 | 7 | 3 | Carbamidomethylation | 15406  | hypothetical protein POPTR_0005s07340g [Populus trichocarpa]                                                 |
| 627  | 545   | gi 526117441 | 108.62 | 5  | 6 | 1 |                      | 101670 | lipxygenase [Vitis vinifera]                                                                                 |
| 1165 | 957   | gi 731389741 | 108.59 | 12 | 7 | 6 | Carbamidomethylation | 69804  | PREDICTED: probable methyltransferase PMT3 [Vitis vinifera]                                                  |
| 945  | 591   | gi 225456270 | 108.43 | 10 | 6 | 3 | Carbamidomethylation | 62432  | PREDICTED: nucleolar protein 56-like [Vitis vinifera]                                                        |
| 873  | 17254 | gi 224075058 | 108.42 | 11 | 5 | 1 | Carbamidomethylation | 53712  | 6-phosphogluconate dehydrogenase family protein [Populus trichocarpa]                                        |
| 914  | 593   | gi 731412938 | 108.29 | 4  | 5 | 1 | Carbamidomethylation | 155024 | PREDICTED: probable phosphoribosylformylglycinamide synthase chloroplastic/mitochondrial [Vitis vinifera]    |
| 723  | 655   | gi 225437420 | 108.22 | 26 | 4 | 4 | Carbamidomethylation | 21061  | PREDICTED: 60S ribosomal protein L18-2 [Vitis vinifera]                                                      |
| 620  | 16954 | gi 224076908 | 108.02 | 18 | 7 | 1 |                      | 40750  | hypothetical protein POPTR_0004s06400g [Populus trichocarpa]                                                 |
| 727  | 612   | gi 225423953 | 107.9  | 17 | 5 | 2 |                      | 41947  | PREDICTED: ubiquitin receptor RAD23c isoform X2 [Vitis vinifera]                                             |
| 988  | 462   | gi 225463163 | 107.87 | 15 | 7 | 1 | Carbamidomethylation | 60505  | PREDICTED: T-complex protein 1 subunit gamma [Vitis vinifera]                                                |
| 1267 | 1093  | gi 225438067 | 107.83 | 14 | 5 | 1 | Carbamidomethylation | 45402  | PREDICTED: succinyl-CoA ligase [ADP-forming] subunit beta mitochondrial [Vitis vinifera]                     |
| 1002 | 17552 | gi 566205234 | 107.81 | 23 | 4 | 1 |                      | 24533  | hypothetical protein POPTR_0015s00570g [Populus trichocarpa]                                                 |

|      |       |              |        |    |   |   |                      |       |                                                                                           |
|------|-------|--------------|--------|----|---|---|----------------------|-------|-------------------------------------------------------------------------------------------|
| 724  | 646   | gi 225456268 | 107.77 | 20 | 5 | 2 | Carbamidomethylation | 26974 | PREDICTED: adenylate kinase 4 [Vitis vinifera]                                            |
| 483  | 17506 | gi 566243399 | 107.34 | 13 | 5 | 1 |                      | 33846 | hypothetical protein POPTR_0019s13040g [Populus trichocarpa]                              |
| 449  | 17658 | gi 224092113 | 107.22 | 10 | 5 | 2 |                      | 40471 | carbon-nitrogen hydrolase family protein [Populus trichocarpa]                            |
| 1060 | 577   | gi 731438110 | 107.09 | 9  | 5 | 5 | Carbamidomethylation | 88481 | PREDICTED: probable cytosolic oligopeptidase A [Vitis vinifera]                           |
| 772  | 832   | gi 225461287 | 107.07 | 28 | 4 | 4 | Carbamidomethylation | 24076 | PREDICTED: cytochrome b6-f complex iron-sulfur subunit 1 chloroplastic [Vitis vinifera]   |
| 1032 | 686   | gi 225429234 | 107.01 | 21 | 5 | 5 |                      | 34319 | PREDICTED: mitochondrial import receptor subunit TOM40-1 [Vitis vinifera]                 |
| 1008 | 932   | gi 225450626 | 106.91 | 12 | 5 | 1 | Carbamidomethylation | 39269 | PREDICTED: probable protein disulfide-isomerase A6 [Vitis vinifera]                       |
| 796  | 17473 | gi 224086589 | 106.82 | 11 | 4 | 1 | Carbamidomethylation | 56517 | POLLEN-PISTIL INTERACTION 2 family protein [Populus trichocarpa]                          |
| 938  | 552   | gi 731438607 | 106.77 | 12 | 5 | 4 |                      | 46196 | PREDICTED: LOW QUALITY PROTEIN: hsp70-Hsp90 organizing protein 3-like [Vitis vinifera]    |
| 821  | 17044 | gi 566194782 | 106.57 | 10 | 7 | 1 | Carbamidomethylation | 75679 | NAD-dependent epimerase/dehydratase family protein [Populus trichocarpa]                  |
| 904  | 601   | gi 731390491 | 106.54 | 7  | 4 | 2 |                      | 84964 | PREDICTED: protein transport protein SEC23-like [Vitis vinifera]                          |
| 996  | 690   | gi 359473310 | 106.46 | 25 | 5 | 1 | Carbamidomethylation | 35042 | PREDICTED: serine/threonine-protein phosphatase PP2A-2 catalytic subunit [Vitis vinifera] |
| 986  | 17093 | gi 224067984 | 106.36 | 12 | 6 | 2 |                      | 68220 | dynammin-like protein B [Populus trichocarpa]                                             |
| 602  | 17620 | gi 224058427 | 106.35 | 15 | 5 | 2 |                      | 28418 | reticulon family protein [Populus trichocarpa]                                            |
| 977  | 17342 | gi 224077760 | 106.23 | 33 | 5 | 1 | Carbamidomethylation | 15880 | 40S ribosomal protein S19 [Populus trichocarpa]                                           |

|      |       |              |        |    |   |   |                      |        |                                                                                                          |
|------|-------|--------------|--------|----|---|---|----------------------|--------|----------------------------------------------------------------------------------------------------------|
| 570  | 17370 | gi 566192956 | 106.2  | 13 | 5 | 1 | Carbamidomethylation | 44225  | hypothetical protein POPTR_0011s00650g [Populus trichocarpa]                                             |
| 754  | 463   | gi 731398611 | 106.15 | 18 | 7 | 1 | Carbamidomethylation | 43372  | PREDICTED: proliferation-associated protein 2G4 [Vitis vinifera]                                         |
| 834  | 17225 | gi 566211906 | 106.06 | 7  | 5 | 2 |                      | 90312  | dynammin-like family protein [Populus trichocarpa]                                                       |
| 624  | 675   | gi 225442801 | 105.97 | 51 | 5 | 1 |                      | 14493  | PREDICTED: probable histone H2A variant 3 [Vitis vinifera]                                               |
| 252  | 493   | gi 225436843 | 105.93 | 46 | 5 | 1 |                      | 14570  | PREDICTED: histone H2AX [Vitis vinifera]                                                                 |
| 749  | 17737 | gi 224096586 | 105.83 | 9  | 5 | 1 |                      | 45989  | eukaryotic translation initiation factor 4A family protein [Populus trichocarpa]                         |
| 689  | 1063  | gi 359491801 | 105.76 | 6  | 5 | 5 |                      | 83367  | PREDICTED: dolichyl-diphosphooligosaccharide--protein glycosyltransferase subunit STT3B [Vitis vinifera] |
| 1420 | 1009  | gi 359480225 | 105.68 | 19 | 5 | 1 | Carbamidomethylation | 27397  | PREDICTED: peptidyl-prolyl cis-trans isomerase [Vitis vinifera]                                          |
| 691  | 422   | gi 731439184 | 105.56 | 10 | 7 | 7 |                      | 109426 | PREDICTED: 26S proteasome non-ATPase regulatory subunit 1 homolog A [Vitis vinifera]                     |
| 925  | 17124 | gi 566259876 | 105.53 | 28 | 6 | 1 | Carbamidomethylation | 23976  | hypothetical protein POPTR_0022s00350g [Populus trichocarpa]                                             |
| 985  | 609   | gi 731392506 | 105.41 | 4  | 5 | 2 | Carbamidomethylation | 129324 | PREDICTED: carbamoyl-phosphate synthase large chain chloroplastic [Vitis vinifera]                       |
| 1001 | 17374 | gi 566147333 | 105.4  | 5  | 6 | 3 |                      | 100058 | hypothetical protein POPTR_0001s05320g [Populus trichocarpa]                                             |
| 1195 | 844   | gi 526117645 | 105.33 | 4  | 5 | 2 |                      | 153182 | magnesium chelatase H subunit [Vitis vinifera]                                                           |
| 603  | 1264  | gi 225442963 | 105.33 | 9  | 4 | 4 |                      | 35176  | PREDICTED: methyl-CpG-binding domain-containing protein 11 [Vitis vinifera]                              |
| 1004 | 17608 | gi 224131618 | 105.31 | 20 | 4 | 4 |                      | 26206  | dienelactone hydrolase family protein [Populus trichocarpa]                                              |

|      |       |              |        |    |   |   |                      |        |                                                                                        |
|------|-------|--------------|--------|----|---|---|----------------------|--------|----------------------------------------------------------------------------------------|
| 956  | 17344 | gi 224125422 | 105.29 | 10 | 6 | 4 | Carbamidomethylation | 56543  | hypothetical protein POPTR_0013s03070g [Populus trichocarpa]                           |
| 605  | 934   | gi 225430153 | 105.24 | 51 | 5 | 1 |                      | 14274  | PREDICTED: probable histone H2A variant 3 [Vitis vinifera]                             |
| 1044 | 17789 | gi 566172819 | 105.15 | 8  | 4 | 2 | Carbamidomethylation | 47443  | hypothetical protein POPTR_0005s23110g [Populus trichocarpa]                           |
| 731  | 17469 | gi 224079472 | 105.11 | 11 | 4 | 4 |                      | 47114  | hypothetical protein POPTR_0004s08560g [Populus trichocarpa]                           |
| 154  | 899   | gi 225431269 | 105.03 | 10 | 3 | 1 | Carbamidomethylation | 36580  | PREDICTED: peroxidase 72 [Vitis vinifera]                                              |
| 844  | 629   | gi 359492254 | 104.96 | 19 | 7 | 1 | Carbamidomethylation | 40876  | PREDICTED: ferredoxin--NADP reductase leaf-type isozyme chloroplastic [Vitis vinifera] |
| 1099 | 1376  | gi 225438619 | 104.87 | 36 | 4 | 1 | Carbamidomethylation | 12309  | PREDICTED: 60S ribosomal protein L30 [Vitis vinifera]                                  |
| 1013 | 693   | gi 225437557 | 104.75 | 9  | 6 | 6 |                      | 81022  | PREDICTED: DNA replication licensing factor MCM7 [Vitis vinifera]                      |
| 1346 | 596   | gi 225466690 | 104.72 | 12 | 4 | 4 |                      | 42525  | PREDICTED: sedoheptulose-1 7-bisphosphatase chloroplastic [Vitis vinifera]             |
| 739  | 405   | gi 225443308 | 104.66 | 9  | 7 | 1 | Carbamidomethylation | 106276 | PREDICTED: coatomer subunit beta-1 [Vitis vinifera]                                    |
| 756  | 17242 | gi 566182348 | 104.62 | 12 | 5 | 1 | Carbamidomethylation | 70505  | peptidase M1 family protein [Populus trichocarpa]                                      |
| 941  | 17168 | gi 224090159 | 104.6  | 4  | 5 | 2 |                      | 151232 | magnesium chelatase subunit family protein [Populus trichocarpa]                       |
| 851  | 667   | gi 225470804 | 104.58 | 10 | 4 | 1 |                      | 45224  | PREDICTED: phosphoribulokinase chloroplastic [Vitis vinifera]                          |
| 1085 | 17222 | gi 224057898 | 104.54 | 8  | 7 | 1 | Carbamidomethylation | 93907  | hypothetical protein POPTR_0001s12380g [Populus trichocarpa]                           |
| 701  | 700   | gi 731391332 | 104.28 | 13 | 5 | 1 |                      | 34474  | PREDICTED: 60S ribosomal protein L5 [Vitis vinifera]                                   |

|      |       |              |        |    |   |   |                      |        |                                                                                                                  |
|------|-------|--------------|--------|----|---|---|----------------------|--------|------------------------------------------------------------------------------------------------------------------|
| 1255 | 17459 | gi 566206568 | 104.17 | 9  | 4 | 2 | Carbamidomethylation | 54924  | Betaine-aldehyde dehydrogenase family protein [Populus trichocarpa]                                              |
| 1009 | 18849 | gi 224065507 | 104.17 | 19 | 3 | 2 |                      | 15080  | Photosystem I reaction center subunit IV A family protein [Populus trichocarpa]                                  |
| 413  | 784   | gi 225462809 | 104.12 | 8  | 4 | 4 |                      | 60994  | PREDICTED: 2-hydroxyacyl-CoA lyase [Vitis vinifera]                                                              |
| 886  | 17464 | gi 566146625 | 104.12 | 9  | 4 | 1 | Carbamidomethylation | 45025  | Phosphoribulokinase family protein [Populus trichocarpa]                                                         |
| 1050 | 17196 | gi 224121218 | 103.9  | 22 | 6 | 2 | Carbamidomethylation | 36046  | GTP-binding protein beta chain [Populus trichocarpa]                                                             |
| 699  | 746   | gi 225447041 | 103.84 | 6  | 3 | 1 | Carbamidomethylation | 60008  | PREDICTED: L-ascorbate oxidase homolog [Vitis vinifera]                                                          |
| 1115 | 17000 | gi 224135449 | 103.77 | 16 | 8 | 1 |                      | 57629  | chaperonin family protein [Populus trichocarpa]                                                                  |
| 650  | 17352 | gi 566156897 | 103.73 | 12 | 4 | 2 | Carbamidomethylation | 46943  | Delta-aminolevulinic acid dehydratase family protein [Populus trichocarpa]                                       |
| 1339 | 17135 | gi 566177234 | 103.71 | 9  | 6 | 5 | Carbamidomethylation | 80627  | minichromosome maintenance family protein [Populus trichocarpa]                                                  |
| 596  | 17487 | gi 566148625 | 103.55 | 10 | 4 | 1 | Carbamidomethylation | 54744  | hypothetical protein POPTR_0001s12690g [Populus trichocarpa]                                                     |
| 896  | 17503 | gi 566165056 | 103.52 | 14 | 4 | 1 | Carbamidomethylation | 36365  | hypothetical protein POPTR_0004s05340g [Populus trichocarpa]                                                     |
| 877  | 662   | gi 225447135 | 103.47 | 55 | 5 | 2 | Carbamidomethylation | 11288  | PREDICTED: small ubiquitin-related modifier 1 [Vitis vinifera]                                                   |
| 795  | 17268 | gi 566211562 | 103.42 | 12 | 7 | 2 | Carbamidomethylation | 49984  | hypothetical protein POPTR_0017s05490g [Populus trichocarpa]                                                     |
| 684  | 668   | gi 225451148 | 103.33 | 16 | 8 | 1 |                      | 57291  | PREDICTED: bifunctional 3-dehydroquinate dehydratase/shikimate dehydrogenase chloroplastic-like [Vitis vinifera] |
| 501  | 769   | gi 359488553 | 103.26 | 5  | 5 | 2 |                      | 115409 | PREDICTED: alpha-mannosidase isoform X2 [Vitis vinifera]                                                         |

|      |       |              |        |    |   |   |                      |        |                                                                        |
|------|-------|--------------|--------|----|---|---|----------------------|--------|------------------------------------------------------------------------|
| 1015 | 772   | gi 225464906 | 103.19 | 30 | 3 | 3 |                      | 16377  | PREDICTED: 40S ribosomal protein S14 [Vitis vinifera]                  |
| 1065 | 875   | gi 225452831 | 103.16 | 15 | 6 | 5 |                      | 43750  | PREDICTED: malate dehydrogenase chloroplastic-like [Vitis vinifera]    |
| 686  | 711   | gi 731416002 | 103.11 | 12 | 5 | 2 | Carbamidomethylation | 46432  | PREDICTED: ATP-citrate synthase alpha chain protein 2 [Vitis vinifera] |
| 1077 | 17382 | gi 566183730 | 103.08 | 12 | 4 | 1 | Carbamidomethylation | 48131  | hypothetical protein POPTR_0008s13180g [Populus trichocarpa]           |
| 550  | 569   | gi 225453215 | 103.02 | 27 | 7 | 2 |                      | 23975  | PREDICTED: 60S ribosomal protein L13-1 [Vitis vinifera]                |
| 1023 | 17641 | gi 566204499 | 103.02 | 10 | 3 | 2 |                      | 47320  | thioredoxin family protein [Populus trichocarpa]                       |
| 767  | 526   | gi 225448739 | 102.86 | 12 | 5 | 1 |                      | 69044  | PREDICTED: leukotriene A-4 hydrolase homolog [Vitis vinifera]          |
| 668  | 17320 | gi 566189392 | 102.81 | 18 | 6 | 6 |                      | 27258  | hypothetical protein POPTR_0010s06320g [Populus trichocarpa]           |
| 875  | 17869 | gi 566168995 | 102.74 | 22 | 3 | 1 |                      | 19031  | callus protein P23 [Populus trichocarpa]                               |
| 812  | 947   | gi 225463556 | 102.71 | 4  | 4 | 1 | Carbamidomethylation | 125024 | PREDICTED: protein TOPLESS [Vitis vinifera]                            |
| 903  | 17449 | gi 224078584 | 102.61 | 15 | 4 | 2 |                      | 33150  | glyoxalase I homolog family protein [Populus trichocarpa]              |
| 156  | 925   | gi 225465425 | 102.6  | 8  | 4 | 3 | Carbamidomethylation | 52683  | PREDICTED: uncharacterized protein LOC100241465 [Vitis vinifera]       |
| 560  | 17536 | gi 566178862 | 102.56 | 11 | 5 | 4 |                      | 34943  | hypothetical protein POPTR_0007s00300g [Populus trichocarpa]           |
| 263  | 559   | gi 225433548 | 102.49 | 29 | 7 | 1 | Carbamidomethylation | 23525  | PREDICTED: 60S ribosomal protein L13a-4 [Vitis vinifera]               |
| 1443 | 854   | gi 731402959 | 102.48 | 15 | 4 | 4 |                      | 35210  | PREDICTED: probable quinone oxidoreductase [Vitis vinifera]            |
| 1047 | 606   | gi 731438689 | 102.31 | 11 | 4 | 1 |                      | 44313  | PREDICTED: FAM10 family protein At4g22670 [Vitis vinifera]             |



|      |       |              |        |    |   |   |                      |        |                                                                                                                        |
|------|-------|--------------|--------|----|---|---|----------------------|--------|------------------------------------------------------------------------------------------------------------------------|
| 662  | 17164 | gi 566147610 | 102.1  | 28 | 7 | 3 | Carbamidomethylation | 20417  | hypothetical protein POPTR_0001s06720g [Populus trichocarpa]                                                           |
| 1134 | 676   | gi 731421194 | 101.88 | 26 | 4 | 2 | Carbamidomethylation | 20876  | PREDICTED: 40S ribosomal protein S13 [Vitis vinifera]                                                                  |
| 1064 | 1127  | gi 731397334 | 101.76 | 7  | 4 | 3 |                      | 73259  | PREDICTED: apoptotic chromatin condensation inducer in the nucleus isoform X2 [Vitis vinifera]                         |
| 916  | 703   | gi 731388929 | 101.72 | 14 | 7 | 2 | Carbamidomethylation | 56541  | PREDICTED: bifunctional 3-dehydroquinase dehydratase/shikimate dehydrogenase chloroplastic isoform X2 [Vitis vinifera] |
| 898  | 17332 | gi 566165023 | 101.68 | 8  | 5 | 1 | Carbamidomethylation | 60040  | hypothetical protein POPTR_0004s05160g [Populus trichocarpa]                                                           |
| 979  | 17589 | gi 224055291 | 101.53 | 8  | 4 | 1 |                      | 56959  | hypothetical protein POPTR_0001s28140g [Populus trichocarpa]                                                           |
| 810  | 1238  | gi 225425166 | 101.5  | 12 | 3 | 3 |                      | 39489  | PREDICTED: pyruvate dehydrogenase E1 component subunit beta-1 mitochondrial [Vitis vinifera]                           |
| 1373 | 785   | gi 225459806 | 101.42 | 7  | 4 | 1 |                      | 57322  | PREDICTED: T-complex protein 1 subunit beta [Vitis vinifera]                                                           |
| 1212 | 685   | gi 225459808 | 101.41 | 8  | 5 | 1 |                      | 60137  | PREDICTED: L-ascorbate oxidase homolog [Vitis vinifera]                                                                |
| 1200 | 723   | gi 731370529 | 101.35 | 9  | 4 | 1 | Carbamidomethylation | 66006  | PREDICTED: serine/threonine-protein phosphatase 2A 65 kDa regulatory subunit A beta isoform-like [Vitis vinifera]      |
| 704  | 17569 | gi 566167161 | 101.1  | 11 | 4 | 1 | Carbamidomethylation | 40240  | hypothetical protein POPTR_0004s18030g [Populus trichocarpa]                                                           |
| 741  | 17252 | gi 224075976 | 101.09 | 18 | 5 | 5 | Carbamidomethylation | 31893  | hypothetical protein POPTR_0003s21070g [Populus trichocarpa]                                                           |
| 917  | 549   | gi 225430366 | 101.06 | 7  | 6 | 2 | Carbamidomethylation | 108100 | PREDICTED: chaperone protein ClpB4 mitochondrial [Vitis vinifera]                                                      |

|      |       |              |        |    |   |   |                      |        |                                                                                               |
|------|-------|--------------|--------|----|---|---|----------------------|--------|-----------------------------------------------------------------------------------------------|
| 1149 | 17458 | gi 224105455 | 101.06 | 10 | 4 | 1 | Carbamidomethylation | 51957  | chloroplast biogenesis family protein [Populus trichocarpa]                                   |
| 1403 | 18383 | gi 224104629 | 100.95 | 7  | 4 | 1 |                      | 46345  | seed maturation protein PM37 [Populus trichocarpa]                                            |
| 744  | 17558 | gi 224127346 | 100.68 | 11 | 4 | 1 |                      | 36420  | arginase family protein [Populus trichocarpa]                                                 |
| 826  | 683   | gi 225456085 | 100.67 | 9  | 6 | 6 |                      | 57173  | PREDICTED: eukaryotic peptide chain release factor GTP-binding subunit ERF3A [Vitis vinifera] |
| 1252 | 17293 | gi 566206565 | 100.63 | 19 | 5 | 5 | Carbamidomethylation | 39138  | hypothetical protein POPTR_0015s08180g [Populus trichocarpa]                                  |
| 1146 | 599   | gi 225459126 | 100.46 | 9  | 5 | 1 |                      | 68420  | PREDICTED: glucose-6-phosphate isomerase 1 chloroplastic [Vitis vinifera]                     |
| 1272 | 423   | gi 225434133 | 100.4  | 15 | 5 | 2 | Carbamidomethylation | 40613  | PREDICTED: cysteine synthase chloroplastic/chromoplastic [Vitis vinifera]                     |
| 1283 | 1226  | gi 731439514 | 100.35 | 15 | 4 | 1 | Carbamidomethylation | 41530  | PREDICTED: acetyl-CoA acetyltransferase cytosolic 1 isoform X4 [Vitis vinifera]               |
| 672  | 816   | gi 526118026 | 100.32 | 13 | 4 | 4 | Carbamidomethylation | 55487  | 5-enolpyruvylshikimate-3-phosphate synthase [Vitis vinifera]                                  |
| 339  | 1257  | gi 225430939 | 100.28 | 22 | 6 | 5 | Carbamidomethylation | 33557  | PREDICTED: isopentenyl-diphosphate Delta-isomerase I [Vitis vinifera]                         |
| 1141 | 814   | gi 225433414 | 100.21 | 14 | 4 | 4 |                      | 36594  | PREDICTED: probable voltage-gated potassium channel subunit beta [Vitis vinifera]             |
| 750  | 678   | gi 731422506 | 100.12 | 4  | 4 | 1 | Carbamidomethylation | 125112 | PREDICTED: protein TOPLESS isoform X4 [Vitis vinifera]                                        |
| 224  | 17157 | gi 566173207 | 100.12 | 51 | 7 | 1 | Carbamidomethylation | 15284  | hypothetical protein POPTR_0005s25530g [Populus trichocarpa]                                  |
| 787  | 17625 | gi 566204315 | 100.05 | 6  | 5 | 3 |                      | 68355  | hypothetical protein POPTR_0014s14690g [Populus trichocarpa]                                  |
| 978  | 17574 | gi 566178300 | 99.9   | 10 | 4 | 1 | Carbamidomethylation | 45519  | hypothetical protein POPTR_0006s26630g [Populus trichocarpa]                                  |

|      |       |              |       |    |   |   |                                        |        |                                                                                                       |
|------|-------|--------------|-------|----|---|---|----------------------------------------|--------|-------------------------------------------------------------------------------------------------------|
| 1076 | 1012  | gi 225430650 | 99.88 | 20 | 6 | 6 | Carbamidomethylation;<br>Oxidation (M) | 43927  | PREDICTED: pyruvate<br>dehydrogenase E1 component<br>subunit beta-3 chloroplastic [Vitis<br>vinifera] |
| 902  | 18232 | gi 566187006 | 99.72 | 7  | 2 | 2 |                                        | 50172  | hypothetical protein<br>POPTR_0009s08570g [Populus<br>trichocarpa]                                    |
| 943  | 17401 | gi 566160244 | 99.63 | 3  | 4 | 3 | Carbamidomethylation                   | 181683 | hypothetical protein<br>POPTR_0003s01280g [Populus<br>trichocarpa]                                    |
| 640  | 829   | gi 225436257 | 99.53 | 12 | 4 | 4 |                                        | 29530  | PREDICTED: chlorophyll a-b<br>binding protein 8 chloroplastic<br>[Vitis vinifera]                     |
| 1304 | 1117  | gi 225455336 | 99.31 | 6  | 3 | 2 | Carbamidomethylation                   | 96439  | PREDICTED: importin subunit<br>beta-1 [Vitis vinifera]                                                |
| 1094 | 1322  | gi 225424805 | 99.21 | 11 | 4 | 2 | Carbamidomethylation                   | 43702  | PREDICTED: pyruvate<br>dehydrogenase E1 component<br>subunit alpha mitochondrial [Vitis<br>vinifera]  |
| 1261 | 17790 | gi 566149831 | 99.02 | 6  | 3 | 1 | Carbamidomethylation                   | 70825  | malate oxidoreductase family<br>protein [Populus trichocarpa]                                         |
| 1078 | 17430 | gi 224055647 | 98.99 | 16 | 5 | 3 |                                        | 32125  | succinate dehydrogenase iron-<br>sulfur protein subunit [Populus<br>trichocarpa]                      |
| 922  | 17240 | gi 566202791 | 98.96 | 11 | 5 | 4 | Carbamidomethylation                   | 59276  | t-complex polypeptide 1 family<br>protein [Populus trichocarpa]                                       |
| 856  | 537   | gi 225465200 | 98.94 | 29 | 6 | 1 | Carbamidomethylation                   | 23863  | PREDICTED: ras-related protein<br>RABA2a [Vitis vinifera]                                             |
| 1340 | 17514 | gi 566170365 | 98.93 | 12 | 4 | 2 | Carbamidomethylation                   | 39182  | hypothetical protein<br>POPTR_0005s09400g partial<br>[Populus trichocarpa]                            |
| 801  | 17315 | gi 224079274 | 98.9  | 14 | 5 | 2 |                                        | 41124  | ubiquitin family protein [Populus<br>trichocarpa]                                                     |
| 1193 | 1310  | gi 731401385 | 98.89 | 7  | 3 | 3 |                                        | 36064  | PREDICTED: uncharacterized<br>protein At5g02240 [Vitis vinifera]                                      |
| 1118 | 605   | gi 731399856 | 98.88 | 5  | 4 | 2 |                                        | 104341 | PREDICTED: villin-2 [Vitis<br>vinifera]                                                               |
| 1298 | 17873 | gi 224058705 | 98.84 | 29 | 3 | 3 | Carbamidomethylation                   | 18641  | cytochrome c oxidase-related<br>family protein [Populus<br>trichocarpa]                               |

|      |       |              |       |    |   |   |                                     |        |                                                                             |
|------|-------|--------------|-------|----|---|---|-------------------------------------|--------|-----------------------------------------------------------------------------|
| 1086 | 908   | gi 225426312 | 98.77 | 11 | 5 | 1 |                                     | 68263  | PREDICTED: dynamin-related protein 5A [Vitis vinifera]                      |
| 707  | 866   | gi 225425304 | 98.76 | 44 | 3 | 3 | Carbamidomethylation                | 9611   | PREDICTED: 40S ribosomal protein S27-2 [Vitis vinifera]                     |
| 1218 | 748   | gi 225441549 | 98.66 | 8  | 4 | 3 |                                     | 67018  | PREDICTED: DEAD-box ATP-dependent RNA helicase 37-like [Vitis vinifera]     |
| 273  | 17510 | gi 224078822 | 98.58 | 40 | 4 | 1 |                                     | 13770  | hypothetical protein POPTR_0004s03100g [Populus trichocarpa]                |
| 1815 | 2169  | gi 731371107 | 98.35 | 6  | 4 | 4 |                                     | 89995  | PREDICTED: probable splicing factor 3A subunit 1 [Vitis vinifera]           |
| 1301 | 17622 | gi 224060455 | 98.13 | 5  | 3 | 1 | Carbamidomethylation                | 85898  | transport family protein [Populus trichocarpa]                              |
| 946  | 766   | gi 225436215 | 98    | 7  | 3 | 2 | Carbamidomethylation                | 70115  | PREDICTED: lysine--tRNA ligase-like [Vitis vinifera]                        |
| 546  | 969   | gi 225426753 | 97.97 | 11 | 7 | 2 | Carbamidomethylation; Oxidation (M) | 81719  | PREDICTED: primary amine oxidase [Vitis vinifera]                           |
| 1097 | 17414 | gi 566206247 | 97.91 | 26 | 5 | 1 |                                     | 19365  | hypothetical protein POPTR_0015s06660g [Populus trichocarpa]                |
| 737  | 17890 | gi 566181315 | 97.86 | 15 | 3 | 1 |                                     | 27367  | malate dehydrogenase family protein partial [Populus trichocarpa]           |
| 1169 | 17395 | gi 224074998 | 97.79 | 5  | 4 | 4 |                                     | 100185 | hypothetical protein POPTR_0003s13040g [Populus trichocarpa]                |
| 1019 | 759   | gi 731412750 | 97.75 | 8  | 4 | 4 |                                     | 62116  | PREDICTED: adenylosuccinate lyase [Vitis vinifera]                          |
| 1392 | 1329  | gi 731405046 | 97.74 | 9  | 5 | 1 | Carbamidomethylation                | 86013  | PREDICTED: DNA replication licensing factor MCM3 homolog 2 [Vitis vinifera] |
| 706  | 729   | gi 731421236 | 97.69 | 13 | 5 | 2 |                                     | 37446  | PREDICTED: arginase 1 mitochondrial [Vitis vinifera]                        |
| 901  | 1006  | gi 225439858 | 97.5  | 21 | 3 | 1 |                                     | 17634  | PREDICTED: 60S ribosomal protein L23a-like [Vitis vinifera]                 |
| 1282 | 792   | gi 225465764 | 97.35 | 15 | 5 | 5 | Carbamidomethylation                | 43403  | PREDICTED: UDP-D-apiose/UDP-D-xylose synthase 2 [Vitis vinifera]            |

|      |       |              |       |    |   |   |                      |       |                                                                                                    |
|------|-------|--------------|-------|----|---|---|----------------------|-------|----------------------------------------------------------------------------------------------------|
| 716  | 750   | gi 225457502 | 97.28 | 14 | 3 | 1 | Carbamidomethylation | 35357 | PREDICTED: probable succinyl-CoA ligase [ADP-forming] subunit alpha mitochondrial [Vitis vinifera] |
| 718  | 811   | gi 225456404 | 97.13 | 9  | 3 | 1 | Carbamidomethylation | 50437 | PREDICTED: glutamate-1-semialdehyde 2 1-aminomutase chloroplastic [Vitis vinifera]                 |
| 997  | 17771 | gi 566148911 | 97.08 | 7  | 3 | 1 | Carbamidomethylation | 48782 | hypothetical protein POPTR_0001s14280g [Populus trichocarpa]                                       |
| 1219 | 17681 | gi 224140109 | 96.97 | 22 | 4 | 2 |                      | 17267 | hypothetical protein POPTR_0016s08070g [Populus trichocarpa]                                       |
| 639  | 17842 | gi 224057968 | 96.95 | 17 | 3 | 1 | Carbamidomethylation | 24349 | photosystem I chain III family protein [Populus trichocarpa]                                       |
| 1369 | 17917 | gi 566206287 | 96.91 | 13 | 4 | 2 |                      | 35464 | ATP synthase gamma chain family protein [Populus trichocarpa]                                      |
| 1087 | 497   | gi 225443506 | 96.82 | 13 | 4 | 4 | Carbamidomethylation | 46436 | PREDICTED: magnesium-chelatase subunit ChII chloroplastic-like [Vitis vinifera]                    |
| 571  | 17844 | gi 566198902 | 96.67 | 31 | 3 | 1 |                      | 15349 | hypothetical protein POPTR_0013s01890g [Populus trichocarpa]                                       |
| 1175 | 848   | gi 225427017 | 96.65 | 9  | 3 | 3 |                      | 37604 | PREDICTED: L-lactate dehydrogenase A isoform X2 [Vitis vinifera]                                   |
| 1494 | 1243  | gi 225438781 | 96.58 | 7  | 4 | 1 | Carbamidomethylation | 71362 | PREDICTED: polyadenylate-binding protein 2 [Vitis vinifera]                                        |
| 831  | 623   | gi 731385630 | 96.57 | 5  | 4 | 4 |                      | 99551 | PREDICTED: heat shock 70 kDa protein 17 [Vitis vinifera]                                           |
| 563  | 18002 | gi 566185685 | 96.49 | 14 | 3 | 1 | Carbamidomethylation | 22408 | hypothetical protein POPTR_0009s01050g [Populus trichocarpa]                                       |
| 974  | 17944 | gi 224093408 | 96.39 | 17 | 3 | 1 | Carbamidomethylation | 18464 | hypothetical protein POPTR_0007s04160g [Populus trichocarpa]                                       |
| 1467 | 17468 | gi 566177699 | 96.23 | 10 | 4 | 2 | Carbamidomethylation | 48113 | hypothetical protein POPTR_0006s23050g [Populus trichocarpa]                                       |

|      |       |              |       |    |   |   |                      |        |                                                                        |
|------|-------|--------------|-------|----|---|---|----------------------|--------|------------------------------------------------------------------------|
| 625  | 548   | gi 225434863 | 96.06 | 8  | 6 | 1 |                      | 88320  | PREDICTED: protein TOC75-3 chloroplastic [Vitis vinifera]              |
| 283  | 1401  | gi 731386455 | 95.35 | 2  | 4 | 2 |                      | 95638  | PREDICTED: sucrose synthase 7 isoform X3 [Vitis vinifera]              |
| 1329 | 2050  | gi 731393849 | 95.15 | 7  | 4 | 4 | Carbamidomethylation | 56128  | PREDICTED: UBP1-associated protein 2A [Vitis vinifera]                 |
| 1184 | 721   | gi 225429209 | 95.15 | 7  | 4 | 3 |                      | 53142  | PREDICTED: serine carboxypeptidase-like 16 [Vitis vinifera]            |
| 1269 | 17511 | gi 566203118 | 94.98 | 20 | 5 | 5 | Carbamidomethylation | 27871  | phosphomannomutase family protein [Populus trichocarpa]                |
| 1139 | 919   | gi 225461703 | 94.93 | 23 | 5 | 2 |                      | 24079  | PREDICTED: ras-related protein RIC2 [Vitis vinifera]                   |
| 1238 | 17916 | gi 566182153 | 94.78 | 9  | 3 | 2 | Carbamidomethylation | 57417  | Serine carboxypeptidase precursor family protein [Populus trichocarpa] |
| 619  | 659   | gi 225435177 | 94.67 | 12 | 4 | 1 | Carbamidomethylation | 27557  | PREDICTED: L-ascorbate peroxidase 2 cytosolic [Vitis vinifera]         |
| 544  | 586   | gi 731439234 | 94.4  | 8  | 5 | 2 | Carbamidomethylation | 74297  | PREDICTED: peroxisomal acyl-coenzyme A oxidase 1 [Vitis vinifera]      |
| 830  | 887   | gi 359479647 | 94.39 | 24 | 5 | 5 | Carbamidomethylation | 22491  | PREDICTED: proteasome subunit beta type-2-A [Vitis vinifera]           |
| 1537 | 17712 | gi 224120862 | 94.36 | 5  | 3 | 1 | Carbamidomethylation | 96570  | importin beta-2 family protein [Populus trichocarpa]                   |
| 728  | 18912 | gi 671743347 | 94.27 | 37 | 3 | 3 |                      | 7800   | photosystem II phosphoprotein (chloroplast) [Camellia pubicosta]       |
| 1370 | 18119 | gi 224063066 | 94.25 | 4  | 2 | 1 |                      | 56188  | disulfide-isomerase family protein [Populus trichocarpa]               |
| 1325 | 17391 | gi 566182904 | 94.12 | 9  | 4 | 4 | Carbamidomethylation | 59760  | hypothetical protein POPTR_0008s07890g [Populus trichocarpa]           |
| 1287 | 17504 | gi 224062301 | 94.09 | 16 | 4 | 1 | Carbamidomethylation | 38139  | hypothetical protein POPTR_0002s04790g [Populus trichocarpa]           |
| 1201 | 1301  | gi 731426495 | 94.06 | 4  | 4 | 2 |                      | 120041 | PREDICTED: alpha-mannosidase [Vitis vinifera]                          |

|      |       |              |       |    |   |   |                      |        |                                                                                               |
|------|-------|--------------|-------|----|---|---|----------------------|--------|-----------------------------------------------------------------------------------------------|
| 1309 | 991   | gi 359494079 | 94.04 | 8  | 4 | 4 | Carbamidomethylation | 65102  | PREDICTED: LOW QUALITY PROTEIN: 65-kDa microtubule-associated protein 1-like [Vitis vinifera] |
| 1157 | 809   | gi 225445206 | 94.02 | 13 | 4 | 1 |                      | 45116  | PREDICTED: aspartate aminotransferase cytoplasmic [Vitis vinifera]                            |
| 900  | 17567 | gi 224071575 | 94    | 9  | 4 | 2 | Carbamidomethylation | 65504  | stress inducible family protein [Populus trichocarpa]                                         |
| 1229 | 17393 | gi 566151113 | 94    | 8  | 4 | 4 |                      | 76209  | hypothetical protein POPTR_0001s26420g [Populus trichocarpa]                                  |
| 890  | 804   | gi 225460542 | 93.95 | 10 | 3 | 1 |                      | 36331  | PREDICTED: heterogeneous nuclear ribonucleoprotein 1 [Vitis vinifera]                         |
| 1262 | 716   | gi 225448823 | 93.93 | 3  | 4 | 2 |                      | 134756 | PREDICTED: splicing factor 3B subunit 3-like [Vitis vinifera]                                 |
| 1248 | 17743 | gi 566175322 | 93.91 | 11 | 3 | 2 |                      | 35273  | aldo/keto reductase family protein [Populus trichocarpa]                                      |
| 1323 | 17463 | gi 224133304 | 93.9  | 9  | 4 | 4 |                      | 60007  | hypothetical protein POPTR_0015s07690g [Populus trichocarpa]                                  |
| 712  | 566   | gi 731407251 | 93.72 | 4  | 4 | 1 |                      | 92866  | PREDICTED: phospholipase D alpha 1-like [Vitis vinifera]                                      |
| 495  | 878   | gi 225452827 | 93.64 | 28 | 4 | 4 |                      | 13746  | PREDICTED: 60S ribosomal protein L34 [Vitis vinifera]                                         |
| 358  | 17645 | gi 566146919 | 93.58 | 6  | 4 | 1 |                      | 68964  | hypothetical protein POPTR_0001s03040g [Populus trichocarpa]                                  |
| 1463 | 1021  | gi 731389102 | 93.53 | 11 | 3 | 3 | Carbamidomethylation | 39883  | PREDICTED: ATP-dependent (S)-NAD(P)H-hydrate hydratase [Vitis vinifera]                       |
| 852  | 1189  | gi 731387811 | 93.29 | 8  | 4 | 1 | Carbamidomethylation | 41241  | PREDICTED: alcohol dehydrogenase 1 [Vitis vinifera]                                           |
| 659  | 17918 | gi 224063643 | 93.11 | 22 | 3 | 1 | Carbamidomethylation | 17863  | 40S ribosomal protein S11 [Populus trichocarpa]                                               |
| 1246 | 652   | gi 225444828 | 93.1  | 10 | 5 | 1 |                      | 57127  | PREDICTED: threonine synthase chloroplastic [Vitis vinifera]                                  |

|      |       |              |       |    |   |   |                      |        |                                                                                               |
|------|-------|--------------|-------|----|---|---|----------------------|--------|-----------------------------------------------------------------------------------------------|
| 725  | 17566 | gi 566254203 | 93.1  | 25 | 4 | 3 |                      | 17971  | hypothetical protein POPTR_1064s00200g [Populus trichocarpa]                                  |
| 1167 | 17260 | gi 224102365 | 93.05 | 12 | 6 | 6 | Carbamidomethylation | 59185  | T-complex protein 1 [Populus trichocarpa]                                                     |
| 1284 | 17563 | gi 566182449 | 93.02 | 19 | 4 | 2 | Carbamidomethylation | 23916  | hypothetical protein POPTR_0008s05160g [Populus trichocarpa]                                  |
| 1079 | 805   | gi 225432846 | 92.94 | 18 | 4 | 1 | Carbamidomethylation | 38533  | PREDICTED: 2-methyl-6-phytyl-14-hydroquinone methyltransferase chloroplastic [Vitis vinifera] |
| 1408 | 1732  | gi 225461632 | 92.64 | 8  | 3 | 3 |                      | 44771  | PREDICTED: uncharacterized protein At3g15000 mitochondrial [Vitis vinifera]                   |
| 1582 | 17911 | gi 566203837 | 92.58 | 10 | 4 | 3 |                      | 39770  | DNAJ heat shock family protein [Populus trichocarpa]                                          |
| 1421 | 790   | gi 731404581 | 92.53 | 6  | 3 | 1 | Carbamidomethylation | 61348  | PREDICTED: apoptosis inhibitor 5 isoform X2 [Vitis vinifera]                                  |
| 1385 | 1222  | gi 225457219 | 92.46 | 11 | 3 | 1 | Carbamidomethylation | 35220  | PREDICTED: ATP synthase subunit gamma mitochondrial [Vitis vinifera]                          |
| 1457 | 763   | gi 225433440 | 92.41 | 11 | 4 | 4 |                      | 53869  | PREDICTED: glutathione reductase cytosolic [Vitis vinifera]                                   |
| 1481 | 1855  | gi 225447510 | 92.36 | 14 | 4 | 1 | Carbamidomethylation | 41132  | PREDICTED: acetyl-CoA acetyltransferase cytosolic 1 [Vitis vinifera]                          |
| 1145 | 17671 | gi 566183513 | 92.27 | 6  | 3 | 2 |                      | 62808  | hypothetical protein POPTR_0008s11770g [Populus trichocarpa]                                  |
| 761  | 913   | gi 225425595 | 92.06 | 12 | 4 | 1 | Carbamidomethylation | 46628  | PREDICTED: ATP-citrate synthase alpha chain protein 1 [Vitis vinifera]                        |
| 987  | 653   | gi 225449060 | 91.94 | 6  | 3 | 3 |                      | 62143  | PREDICTED: protein disulfide isomerase-like 1-4 [Vitis vinifera]                              |
| 1071 | 17475 | gi 224107361 | 91.89 | 4  | 5 | 2 |                      | 128813 | ADP-forming family protein [Populus trichocarpa]                                              |
| 504  | 540   | gi 225449262 | 91.8  | 28 | 7 | 1 |                      | 18173  | PREDICTED: 18.1 kDa class I heat shock protein [Vitis vinifera]                               |



|      |       |              |       |    |   |   |                      |        |                                                                                              |
|------|-------|--------------|-------|----|---|---|----------------------|--------|----------------------------------------------------------------------------------------------|
| 1066 | 17465 | gi 566170876 | 91.71 | 11 | 4 | 4 | Carbamidomethylation | 41487  | GDP-mannose 4 family protein [Populus trichocarpa]                                           |
| 1113 | 18456 | gi 566258110 | 91.7  | 14 | 3 | 1 |                      | 21715  | hypothetical protein POPTR_0128s00210g [Populus trichocarpa]                                 |
| 1235 | 17990 | gi 224072588 | 91.58 | 12 | 4 | 4 | Carbamidomethylation | 30737  | hypothetical protein POPTR_0003s17100g partial [Populus trichocarpa]                         |
| 859  | 762   | gi 225448367 | 91.29 | 10 | 3 | 3 |                      | 34281  | PREDICTED: 60S acidic ribosomal protein P0 [Vitis vinifera]                                  |
| 1461 | 1177  | gi 225441573 | 91.28 | 4  | 4 | 2 | Carbamidomethylation | 107099 | PREDICTED: eukaryotic translation initiation factor 3 subunit C [Vitis vinifera]             |
| 1333 | 1354  | gi 731430037 | 91.27 | 9  | 3 | 3 | Carbamidomethylation | 43016  | PREDICTED: probable cinnamyl alcohol dehydrogenase 6 [Vitis vinifera]                        |
| 1211 | 1290  | gi 225453909 | 90.81 | 17 | 3 | 3 | Carbamidomethylation | 24628  | PREDICTED: proteasome subunit beta type-1 [Vitis vinifera]                                   |
| 1675 | 1233  | gi 225448904 | 90.71 | 7  | 2 | 1 |                      | 48063  | PREDICTED: malate dehydrogenase [NADP] chloroplastic [Vitis vinifera]                        |
| 1111 | 17448 | gi 566149991 | 90.71 | 11 | 4 | 1 | Carbamidomethylation | 47475  | hypothetical protein POPTR_0001s20510g [Populus trichocarpa]                                 |
| 1615 | 907   | gi 731395413 | 90.53 | 18 | 4 | 3 | Carbamidomethylation | 31798  | PREDICTED: bifunctional protein FoD 2 [Vitis vinifera]                                       |
| 1127 | 1517  | gi 225445883 | 90.53 | 26 | 3 | 1 | Carbamidomethylation | 14777  | PREDICTED: 40S ribosomal protein S12 [Vitis vinifera]                                        |
| 1190 | 17346 | gi 224138722 | 90.51 | 18 | 5 | 1 |                      | 39574  | isocitrate dehydrogenase family protein [Populus trichocarpa]                                |
| 1397 | 857   | gi 225424598 | 90.5  | 16 | 3 | 3 | Carbamidomethylation | 29498  | PREDICTED: proteasome subunit beta type-7-A [Vitis vinifera]                                 |
| 545  | 807   | gi 225461209 | 90.48 | 17 | 3 | 1 |                      | 21740  | PREDICTED: NAD(P)H dehydrogenase (quinone) FQR1 [Vitis vinifera]                             |
| 1281 | 2193  | gi 225435604 | 90.15 | 15 | 5 | 5 |                      | 41693  | PREDICTED: enoyl-[acyl-carrier-protein] reductase [NADH] chloroplastic-like [Vitis vinifera] |

|      |       |              |       |    |   |   |                      |       |                                                                                              |
|------|-------|--------------|-------|----|---|---|----------------------|-------|----------------------------------------------------------------------------------------------|
| 934  | 17949 | gi 224132216 | 90.14 | 27 | 4 | 1 | Carbamidomethylation | 11688 | hypothetical protein POPTR_0014s18990g [Populus trichocarpa]                                 |
| 1379 | 17500 | gi 224107863 | 90.07 | 11 | 4 | 2 |                      | 43257 | pyruvate dehydrogenase family protein [Populus trichocarpa]                                  |
| 1520 | 17549 | gi 566187890 | 89.96 | 9  | 4 | 4 | Carbamidomethylation | 55453 | 26S proteasome regulatory subunit S3 family protein [Populus trichocarpa]                    |
| 382  | 17604 | gi 566194465 | 89.92 | 15 | 4 | 3 |                      | 24921 | SGS domain-containing family protein [Populus trichocarpa]                                   |
| 1468 | 715   | gi 731436956 | 89.88 | 10 | 4 | 2 | Carbamidomethylation | 39713 | PREDICTED: porphobilinogen deaminase chloroplastic [Vitis vinifera]                          |
| 1407 | 17943 | gi 566153313 | 89.88 | 4  | 3 | 1 |                      | 82969 | hypothetical protein POPTR_0001s37610g [Populus trichocarpa]                                 |
| 1181 | 1650  | gi 225439520 | 89.85 | 9  | 5 | 2 |                      | 65247 | PREDICTED: pyruvate decarboxylase 2 [Vitis vinifera]                                         |
| 1633 | 1742  | gi 731436287 | 89.68 | 3  | 2 | 2 | Carbamidomethylation | 96261 | PREDICTED: histidine--tRNA ligase [Vitis vinifera]                                           |
| 891  | 710   | gi 731382436 | 89.53 | 9  | 3 | 1 |                      | 35672 | PREDICTED: LOW QUALITY PROTEIN: isoflavone reductase-like protein [Vitis vinifera]           |
| 657  | 682   | gi 225423491 | 89.53 | 19 | 5 | 1 |                      | 29672 | PREDICTED: 14-3-3-like protein GF14 iota [Vitis vinifera]                                    |
| 1564 | 1271  | gi 225459587 | 89.51 | 6  | 3 | 2 |                      | 55671 | PREDICTED: protein disulfide-isomerase [Vitis vinifera]                                      |
| 371  | 1639  | gi 526118028 | 89.5  | 10 | 5 | 5 |                      | 30741 | aquaporin-like [Vitis vinifera]                                                              |
| 253  | 987   | gi 731411833 | 89.39 | 9  | 2 | 2 | Carbamidomethylation | 35859 | PREDICTED: nitrilase-like protein 2 [Vitis vinifera]                                         |
| 860  | 18055 | gi 566207899 | 89.27 | 20 | 3 | 3 |                      | 23136 | hypothetical protein POPTR_0016s00400g [Populus trichocarpa]                                 |
| 1098 | 861   | gi 731383682 | 89.16 | 15 | 3 | 2 |                      | 23042 | PREDICTED: ras-related protein Rab7 [Vitis vinifera]                                         |
| 1295 | 986   | gi 225440013 | 89.16 | 17 | 5 | 1 |                      | 40309 | PREDICTED: isocitrate dehydrogenase [NAD] catalytic subunit 5 mitochondrial [Vitis vinifera] |

|      |       |              |       |    |   |   |                                     |        |                                                                                                      |
|------|-------|--------------|-------|----|---|---|-------------------------------------|--------|------------------------------------------------------------------------------------------------------|
| 923  | 17249 | gi 566161432 | 89.02 | 6  | 5 | 2 |                                     | 74324  | acyl-CoA oxidase family protein [Populus trichocarpa]                                                |
| 854  | 18108 | gi 566183164 | 89.01 | 19 | 2 | 1 |                                     | 19589  | hypothetical protein POPTR_0008s09660g [Populus trichocarpa]                                         |
| 1285 | 1608  | gi 225452228 | 88.99 | 12 | 3 | 1 | Carbamidomethylation                | 30877  | PREDICTED: succinate dehydrogenase [ubiquinone] iron-sulfur subunit 1 mitochondrial [Vitis vinifera] |
| 1194 | 17624 | gi 224104329 | 88.81 | 5  | 3 | 1 |                                     | 96949  | alpha-glucan phosphorylase family protein [Populus trichocarpa]                                      |
| 1209 | 709   | gi 359484512 | 88.74 | 7  | 4 | 1 |                                     | 63994  | PREDICTED: asparagine--tRNA ligase cytoplasmic 1 [Vitis vinifera]                                    |
| 1166 | 706   | gi 225446693 | 88.7  | 10 | 6 | 4 |                                     | 74318  | PREDICTED: ATP-dependent zinc metalloprotease FTSH 2 chloroplastic [Vitis vinifera]                  |
| 1436 | 18027 | gi 566197725 | 88.58 | 8  | 3 | 3 |                                     | 56765  | hypothetical protein POPTR_0012s10030g [Populus trichocarpa]                                         |
| 1102 | 2044  | gi 225443859 | 88.54 | 6  | 2 | 1 |                                     | 24656  | PREDICTED: calcyclin-binding protein [Vitis vinifera]                                                |
| 929  | 17773 | gi 566213322 | 88.54 | 8  | 3 | 2 | Carbamidomethylation                | 55497  | hypothetical protein POPTR_0017s14220g [Populus trichocarpa]                                         |
| 846  | 813   | gi 225425356 | 88.53 | 13 | 3 | 3 |                                     | 32651  | PREDICTED: U2 small nuclear ribonucleoprotein A' [Vitis vinifera]                                    |
| 1095 | 17619 | gi 566174513 | 88.41 | 5  | 5 | 2 |                                     | 104323 | Villin 2 family protein [Populus trichocarpa]                                                        |
| 1418 | 17577 | gi 566188043 | 88.38 | 17 | 4 | 1 | Oxidation (M)                       | 43097  | hypothetical protein POPTR_0009s14830g [Populus trichocarpa]                                         |
| 814  | 819   | gi 731423558 | 88.27 | 5  | 5 | 4 | Carbamidomethylation; Oxidation (M) | 120839 | PREDICTED: valine--tRNA ligase isoform X2 [Vitis vinifera]                                           |
| 1290 | 796   | gi 225423755 | 88.18 | 9  | 3 | 3 |                                     | 44272  | PREDICTED: photosystem II stability/assembly factor HCF136 chloroplastic [Vitis vinifera]            |
| 1358 | 977   | gi 225451247 | 88.12 | 27 | 3 | 3 |                                     | 15707  | PREDICTED: 40S ribosomal protein S24-1 [Vitis vinifera]                                              |

|      |       |              |       |    |   |   |                                     |       |                                                                                                 |
|------|-------|--------------|-------|----|---|---|-------------------------------------|-------|-------------------------------------------------------------------------------------------------|
| 1140 | 874   | gi 359478691 | 88.09 | 8  | 4 | 2 |                                     | 92178 | PREDICTED: beta-galactosidase 8 [Vitis vinifera]                                                |
| 845  | 705   | gi 225428009 | 88.05 | 10 | 3 | 1 | Carbamidomethylation                | 31769 | PREDICTED: L-ascorbate peroxidase 3 peroxisomal [Vitis vinifera]                                |
| 1319 | 18399 | gi 566174518 | 87.9  | 9  | 2 | 2 | Carbamidomethylation                | 40168 | hypothetical protein POPTR_0006s04880g [Populus trichocarpa]                                    |
| 1231 | 17548 | gi 224139168 | 87.9  | 9  | 4 | 1 | Carbamidomethylation; Oxidation (M) | 65070 | pyruvate decarboxylase family protein [Populus trichocarpa]                                     |
| 1745 | 17822 | gi 224074207 | 87.86 | 10 | 3 | 3 | Carbamidomethylation                | 46983 | carbamoyl phosphate synthetase a family protein [Populus trichocarpa]                           |
| 636  | 836   | gi 225458231 | 87.78 | 15 | 4 | 4 | Carbamidomethylation                | 30646 | PREDICTED: proteasome subunit alpha type-1-B [Vitis vinifera]                                   |
| 1395 | 1156  | gi 225436289 | 87.77 | 18 | 4 | 1 | Oxidation (M)                       | 43082 | PREDICTED: probable aldo-keto reductase 2 isoform X1 [Vitis vinifera]                           |
| 804  | 1029  | gi 359473645 | 87.74 | 3  | 3 | 1 | Carbamidomethylation                | 66079 | PREDICTED: chaperonin 60 subunit beta 4 chloroplastic [Vitis vinifera]                          |
| 1159 | 2139  | gi 225431755 | 87.74 | 5  | 4 | 1 |                                     | 78694 | PREDICTED: glyoxysomal fatty acid beta-oxidation multifunctional protein MFP-a [Vitis vinifera] |
| 610  | 17523 | gi 224107106 | 87.71 | 6  | 5 | 1 |                                     | 79571 | MULTIFUNCTIONAL family protein [Populus trichocarpa]                                            |
| 1133 | 870   | gi 225443554 | 87.62 | 18 | 4 | 1 |                                     | 24263 | PREDICTED: ras-related protein RABA1f [Vitis vinifera]                                          |
| 564  | 18110 | gi 566168071 | 87.59 | 15 | 3 | 1 |                                     | 22042 | Superoxide dismutase family protein [Populus trichocarpa]                                       |
| 1313 | 765   | gi 225443272 | 87.56 | 7  | 4 | 1 | Oxidation (M)                       | 66288 | PREDICTED: D-3-phosphoglycerate dehydrogenase 3 chloroplastic-like [Vitis vinifera]             |
| 1521 | 17602 | gi 566191545 | 87.51 | 13 | 4 | 2 | Carbamidomethylation                | 40561 | hypothetical protein POPTR_0010s18770g [Populus trichocarpa]                                    |
| 1187 | 1529  | gi 225432466 | 87.5  | 17 | 2 | 2 | Carbamidomethylation                | 18476 | PREDICTED: peptide methionine sulfoxide reductase B5-like [Vitis vinifera]                      |

|      |       |              |       |    |   |   |                      |        |                                                                             |
|------|-------|--------------|-------|----|---|---|----------------------|--------|-----------------------------------------------------------------------------|
| 1035 | 17702 | gi 566185160 | 87.45 | 4  | 4 | 4 |                      | 123192 | hypothetical protein POPTR_0008s21030g [Populus trichocarpa]                |
| 1483 | 17738 | gi 224066507 | 87.43 | 7  | 3 | 1 | Carbamidomethylation | 43683  | mRNA-binding family protein [Populus trichocarpa]                           |
| 1198 | 695   | gi 359487652 | 87.41 | 8  | 4 | 2 | Carbamidomethylation | 54144  | PREDICTED: fumarate hydratase 1 mitochondrial [Vitis vinifera]              |
| 1069 | 17377 | gi 224121958 | 87.36 | 8  | 5 | 2 |                      | 60274  | nucleolar family protein [Populus trichocarpa]                              |
| 1422 | 17937 | gi 224101127 | 87.27 | 15 | 3 | 2 | Carbamidomethylation | 30103  | Chlorophyll a-b binding protein CP29.3 [Populus trichocarpa]                |
| 1315 | 17480 | gi 566164885 | 87.13 | 7  | 4 | 1 |                      | 81287  | Vesicle-fusing ATPase family protein [Populus trichocarpa]                  |
| 1278 | 1605  | gi 225460977 | 87.03 | 13 | 3 | 1 | Carbamidomethylation | 20368  | PREDICTED: reactive Intermediate Deaminase A chloroplastic [Vitis vinifera] |
| 1410 | 18208 | gi 566210556 | 87.02 | 8  | 3 | 2 |                      | 40209  | putative protein phosphatase [Populus trichocarpa]                          |
| 1419 | 725   | gi 225434692 | 86.98 | 4  | 3 | 1 |                      | 95490  | PREDICTED: alpha-glucan phosphorylase H isozyme [Vitis vinifera]            |
| 340  | 17987 | gi 224119894 | 86.62 | 6  | 3 | 1 |                      | 61014  | Calnexin precursor family protein [Populus trichocarpa]                     |
| 1330 | 1632  | gi 225447707 | 86.58 | 18 | 4 | 1 | Carbamidomethylation | 27098  | PREDICTED: uncharacterized protein LOC100263170 [Vitis vinifera]            |
| 1260 | 18418 | gi 566234529 | 86.51 | 22 | 3 | 2 | Carbamidomethylation | 13103  | hypothetical protein POPTR_0019s07730g [Populus trichocarpa]                |
| 1469 | 1178  | gi 225461906 | 86.5  | 5  | 3 | 1 | Carbamidomethylation | 67756  | PREDICTED: DNA ligase 1 [Vitis vinifera]                                    |
| 915  | 17665 | gi 566230552 | 86.21 | 16 | 4 | 3 |                      | 26405  | vacuolar ATPase subunit E family protein [Populus trichocarpa]              |
| 918  | 941   | gi 225456914 | 86.13 | 21 | 4 | 3 | Carbamidomethylation | 16350  | PREDICTED: 60S ribosomal protein L27a-3 [Vitis vinifera]                    |
| 1120 | 18196 | gi 566245692 | 86.01 | 11 | 3 | 1 |                      | 25488  | hypothetical protein POPTR_0019s15100g [Populus trichocarpa]                |
| 1573 | 1120  | gi 225465441 | 85.95 | 17 | 2 | 1 |                      | 14675  | PREDICTED: cytochrome b5 [Vitis vinifera]                                   |

|      |       |              |       |    |   |   |                                     |        |                                                                                         |
|------|-------|--------------|-------|----|---|---|-------------------------------------|--------|-----------------------------------------------------------------------------------------|
| 674  | 1286  | gi 731433731 | 85.9  | 8  | 4 | 2 |                                     | 30030  | PREDICTED: glutathione S-transferase U21-like [Vitis vinifera]                          |
| 1125 | 730   | gi 731433246 | 85.9  | 5  | 3 | 3 | Carbamidomethylation                | 78819  | PREDICTED: threonine--tRNA ligase mitochondrial-like [Vitis vinifera]                   |
| 791  | 1498  | gi 225459760 | 85.78 | 12 | 4 | 4 |                                     | 33454  | PREDICTED: thioredoxin-like protein CDSP32 chloroplastic [Vitis vinifera]               |
| 1289 | 17585 | gi 224133188 | 85.77 | 15 | 4 | 1 | Carbamidomethylation                | 35890  | GTP-binding protein beta chain [Populus trichocarpa]                                    |
| 136  | 736   | gi 225455934 | 85.76 | 19 | 4 | 2 | Carbamidomethylation; Oxidation (M) | 20429  | PREDICTED: ribulose bisphosphate carboxylase small chain chloroplastic [Vitis vinifera] |
| 1503 | 17777 | gi 566153407 | 85.69 | 11 | 5 | 4 |                                     | 42007  | ferredoxin-NADP reductase family protein [Populus trichocarpa]                          |
| 1388 | 17389 | gi 566168468 | 85.67 | 8  | 4 | 4 |                                     | 68078  | RNase L inhibitor family protein [Populus trichocarpa]                                  |
| 855  | 18134 | gi 566258065 | 85.59 | 14 | 2 | 2 |                                     | 16877  | hypothetical protein POPTR_0133s00270g partial [Populus trichocarpa]                    |
| 803  | 17596 | gi 566171781 | 85.47 | 5  | 4 | 2 |                                     | 84742  | hypothetical protein POPTR_0005s16660g [Populus trichocarpa]                            |
| 1383 | 18212 | gi 224057272 | 85.45 | 8  | 2 | 2 |                                     | 45612  | aspartyl protease family protein [Populus trichocarpa]                                  |
| 865  | 17513 | gi 225428380 | 85.35 | 9  | 5 | 4 | Carbamidomethylation                | 70298  | PREDICTED: SUMO-activating enzyme subunit 2 isoform X1 [Vitis vinifera]                 |
| 1793 | 900   | gi 225446797 | 85.29 | 9  | 4 | 4 | Carbamidomethylation                | 55221  | PREDICTED: switch-associated protein 70 [Vitis vinifera]                                |
| 318  | 1530  | gi 731430493 | 85.27 | 4  | 2 | 2 | Carbamidomethylation                | 62956  | PREDICTED: laccase-14-like [Vitis vinifera]                                             |
| 1196 | 717   | gi 225463033 | 85.25 | 5  | 4 | 4 | Carbamidomethylation                | 110326 | PREDICTED: 116 kDa U5 small nuclear ribonucleoprotein component [Vitis vinifera]        |
| 1210 | 794   | gi 731374652 | 85.19 | 8  | 3 | 1 |                                     | 58335  | PREDICTED: aldehyde dehydrogenase family 2 member B4 mitochondrial [Vitis vinifera]     |

|      |       |              |       |    |   |   |                      |        |                                                                                      |
|------|-------|--------------|-------|----|---|---|----------------------|--------|--------------------------------------------------------------------------------------|
| 1599 | 17965 | gi 224062213 | 85.08 | 31 | 3 | 3 |                      | 17225  | hypothetical protein POPTR_0002s04420g [Populus trichocarpa]                         |
| 1795 | 17815 | gi 566187112 | 85.08 | 12 | 3 | 3 | Carbamidomethylation | 38128  | WD-40 repeat family protein [Populus trichocarpa]                                    |
| 1256 | 17497 | gi 566205259 | 85.03 | 17 | 4 | 3 |                      | 29312  | hypothetical protein POPTR_0015s00690g [Populus trichocarpa]                         |
| 1207 | 845   | gi 225428011 | 84.93 | 8  | 5 | 3 |                      | 61287  | PREDICTED: synaptotagmin-2 [Vitis vinifera]                                          |
| 1233 | 1091  | gi 225428916 | 84.9  | 11 | 3 | 2 |                      | 39009  | PREDICTED: probable cinnamyl alcohol dehydrogenase 1 [Vitis vinifera]                |
| 1765 | 17753 | gi 566209835 | 84.85 | 8  | 3 | 3 | Carbamidomethylation | 54998  | hypothetical protein POPTR_0016s12030g [Populus trichocarpa]                         |
| 958  | 1421  | gi 731386809 | 84.79 | 8  | 2 | 1 |                      | 41704  | PREDICTED: naringenin 2-oxoglutarate 3-dioxygenase-like [Vitis vinifera]             |
| 1546 | 1772  | gi 225451677 | 84.74 | 4  | 4 | 1 |                      | 108901 | PREDICTED: staphylococcal nuclease domain-containing protein 1 [Vitis vinifera]      |
| 1116 | 787   | gi 225450299 | 84.73 | 7  | 3 | 3 |                      | 52389  | PREDICTED: citrate synthase mitochondrial [Vitis vinifera]                           |
| 868  | 17931 | gi 224079093 | 84.71 | 29 | 3 | 3 |                      | 12417  | 60S ribosomal protein L36-3 [Populus trichocarpa]                                    |
| 1495 | 17782 | gi 224143559 | 84.68 | 9  | 3 | 1 |                      | 44475  | aspartate aminotransferase family protein [Populus trichocarpa]                      |
| 614  | 17746 | gi 566215609 | 84.62 | 4  | 3 | 2 |                      | 91834  | hypothetical protein POPTR_0018s13110g [Populus trichocarpa]                         |
| 1396 | 17720 | gi 566197177 | 84.57 | 6  | 4 | 3 |                      | 52151  | geranylgeranyl reductase family protein [Populus trichocarpa]                        |
| 1682 | 17909 | gi 224133898 | 84.45 | 7  | 3 | 3 | Carbamidomethylation | 53810  | aspartyl aminopeptidase family protein [Populus trichocarpa]                         |
| 182  | 17829 | gi 566171611 | 84.42 | 13 | 3 | 1 | Oxidation (M)        | 20390  | Ribulose biphosphate carboxylase small chain 1A family protein [Populus trichocarpa] |

|      |       |              |       |    |   |   |                      |        |                                                                                  |
|------|-------|--------------|-------|----|---|---|----------------------|--------|----------------------------------------------------------------------------------|
| 1225 | 1102  | gi 225452700 | 84.39 | 10 | 4 | 2 |                      | 29376  | PREDICTED: mitochondrial outer membrane protein porin of 34 kDa [Vitis vinifera] |
| 1213 | 17408 | gi 566192263 | 84.29 | 14 | 5 | 5 |                      | 47039  | chorismate synthase family protein [Populus trichocarpa]                         |
| 1681 | 17796 | gi 566194692 | 84.25 | 11 | 3 | 1 | Carbamidomethylation | 32070  | hypothetical protein POPTR_0011s10100g [Populus trichocarpa]                     |
| 906  | 888   | gi 225448819 | 84.21 | 24 | 3 | 3 |                      | 14272  | PREDICTED: 60S ribosomal protein L35 [Vitis vinifera]                            |
| 1089 | 868   | gi 225455106 | 84.12 | 9  | 3 | 3 |                      | 33350  | PREDICTED: protein BOBBER 1 [Vitis vinifera]                                     |
| 839  | 1022  | gi 225456800 | 84.06 | 9  | 5 | 2 | Carbamidomethylation | 77878  | PREDICTED: programmed cell death protein 4 [Vitis vinifera]                      |
| 1522 | 856   | gi 225454422 | 84.03 | 23 | 3 | 3 |                      | 16418  | PREDICTED: eukaryotic translation initiation factor 1A [Vitis vinifera]          |
| 1073 | 17694 | gi 224059670 | 84    | 16 | 3 | 2 |                      | 25980  | 60S ribosomal protein L6 [Populus trichocarpa]                                   |
| 1460 | 18068 | gi 359474588 | 83.83 | 6  | 3 | 1 | Carbamidomethylation | 69281  | PREDICTED: probable methyltransferase PMT14 [Vitis vinifera]                     |
| 1051 | 946   | gi 225429638 | 83.76 | 10 | 4 | 1 |                      | 39454  | PREDICTED: omega-amidase chloroplastic [Vitis vinifera]                          |
| 1100 | 17927 | gi 566171321 | 83.62 | 14 | 3 | 1 |                      | 33667  | pfkB-type carbohydrate kinase family protein [Populus trichocarpa]               |
| 1644 | 17821 | gi 566182683 | 83.55 | 12 | 3 | 3 |                      | 34990  | hypothetical protein POPTR_0008s06540g [Populus trichocarpa]                     |
| 1250 | 797   | gi 225433894 | 83.43 | 2  | 4 | 4 | Carbamidomethylation | 246915 | PREDICTED: U5 small nuclear ribonucleoprotein 200 kDa helicase [Vitis vinifera]  |
| 871  | 18472 | gi 566162504 | 83.43 | 27 | 3 | 2 | Carbamidomethylation | 11964  | hypothetical protein POPTR_0003s13600g [Populus trichocarpa]                     |
| 1386 | 1270  | gi 225437762 | 83.43 | 8  | 3 | 3 | Carbamidomethylation | 59105  | PREDICTED: protoporphyrinogen oxidase 1 chloroplastic [Vitis vinifera]           |



|      |       |              |       |    |   |   |                      |       |                                                                                                 |
|------|-------|--------------|-------|----|---|---|----------------------|-------|-------------------------------------------------------------------------------------------------|
| 757  | 17507 | gi 224066959 | 83.41 | 13 | 4 | 1 |                      | 29005 | 14-3-3-like protein GF14 omicron [Populus trichocarpa]                                          |
| 1274 | 1320  | gi 731440862 | 83.39 | 25 | 4 | 4 | Carbamidomethylation | 15642 | PREDICTED: 60S ribosomal protein L32-1 [Vitis vinifera]                                         |
| 829  | 2095  | gi 225447745 | 83.38 | 11 | 2 | 2 |                      | 27216 | PREDICTED: chlorophyll a-b binding protein CP24 10A chloroplastic [Vitis vinifera]              |
| 1639 | 17708 | gi 566160633 | 83.36 | 8  | 3 | 1 |                      | 51164 | WD-40 repeat protein MSI4 [Populus trichocarpa]                                                 |
| 1052 | 903   | gi 225453158 | 83.1  | 9  | 3 | 1 |                      | 41234 | PREDICTED: probable fructokinase-6 chloroplastic [Vitis vinifera]                               |
| 1220 | 1380  | gi 731390561 | 83.1  | 6  | 3 | 3 | Carbamidomethylation | 58745 | PREDICTED: probable aldo-keto reductase 4 [Vitis vinifera]                                      |
| 1646 | 18314 | gi 224088282 | 83.06 | 4  | 2 | 1 |                      | 73935 | hypothetical protein POPTR_0006s19780g [Populus trichocarpa]                                    |
| 1192 | 1503  | gi 225461001 | 83.01 | 7  | 2 | 2 |                      | 46284 | PREDICTED: polyadenylate-binding protein RBP45-like [Vitis vinifera]                            |
| 1152 | 1353  | gi 225428047 | 82.98 | 18 | 3 | 3 | Carbamidomethylation | 17518 | PREDICTED: SKP1-like protein 1A isoform X5 [Vitis vinifera]                                     |
| 1502 | 1087  | gi 731394579 | 82.92 | 14 | 3 | 3 | Carbamidomethylation | 24605 | PREDICTED: 60S ribosomal protein L10a-1-like [Vitis vinifera]                                   |
| 951  | 979   | gi 731416996 | 82.84 | 7  | 3 | 2 |                      | 46827 | PREDICTED: poly(rC)-binding protein 3 [Vitis vinifera]                                          |
| 1894 | 2166  | gi 359473071 | 82.76 | 4  | 2 | 2 |                      | 65661 | PREDICTED: bifunctional purine biosynthesis protein purH isoform X2 [Vitis vinifera]            |
| 1374 | 1194  | gi 225464297 | 82.65 | 4  | 2 | 1 | Carbamidomethylation | 84117 | PREDICTED: protein transport protein SEC23 [Vitis vinifera]                                     |
| 1424 | 2203  | gi 731387671 | 82.52 | 7  | 2 | 2 | Carbamidomethylation | 39674 | PREDICTED: thioredoxin reductase NTRB-like [Vitis vinifera]                                     |
| 1123 | 17626 | gi 224072049 | 82.44 | 13 | 4 | 1 |                      | 28211 | reticulon family protein [Populus trichocarpa]                                                  |
| 637  | 1507  | gi 225470846 | 82.44 | 13 | 2 | 1 |                      | 22027 | PREDICTED: nascent polypeptide-associated complex subunit alpha-like protein 1 [Vitis vinifera] |

|      |       |              |       |    |   |   |                                     |        |                                                                                               |
|------|-------|--------------|-------|----|---|---|-------------------------------------|--------|-----------------------------------------------------------------------------------------------|
| 1690 | 1404  | gi 225437172 | 82.35 | 12 | 3 | 1 |                                     | 38410  | PREDICTED: 2-methyl-6-phytyl-14-hydroquinone methyltransferase chloroplastic [Vitis vinifera] |
| 1126 | 901   | gi 359493854 | 82.35 | 17 | 3 | 2 |                                     | 20058  | PREDICTED: thioredoxin M4 chloroplastic [Vitis vinifera]                                      |
| 1742 | 17697 | gi 566213932 | 82.35 | 5  | 3 | 1 |                                     | 82500  | Eukaryotic translation initiation factor 3 subunit 9 family protein [Populus trichocarpa]     |
| 629  | 18170 | gi 566157284 | 82.24 | 4  | 3 | 1 | Carbamidomethylation                | 48713  | chloroplast nucleoid DNA-binding family protein [Populus trichocarpa]                         |
| 973  | 17578 | gi 566198207 | 82.24 | 11 | 4 | 1 |                                     | 32557  | hypothetical protein POPTR_0012s12860g [Populus trichocarpa]                                  |
| 1043 | 1707  | gi 225434191 | 82.15 | 9  | 3 | 1 | Carbamidomethylation                | 37891  | PREDICTED: 2-alkenal reductase (NADP(+)-dependent) [Vitis vinifera]                           |
| 1132 | 17447 | gi 566185959 | 82.05 | 15 | 4 | 4 | Carbamidomethylation; Oxidation (M) | 27367  | Proteasome subunit alpha type 3 family protein [Populus trichocarpa]                          |
| 969  | 687   | gi 359490482 | 82.03 | 12 | 4 | 1 |                                     | 33398  | PREDICTED: probable mediator of RNA polymerase II transcription subunit 36b [Vitis vinifera]  |
| 870  | 1352  | gi 225428908 | 81.89 | 5  | 2 | 2 |                                     | 53765  | PREDICTED: limonoid UDP-glucosyltransferase [Vitis vinifera]                                  |
| 1223 | 812   | gi 731423236 | 81.87 | 7  | 3 | 2 |                                     | 65721  | PREDICTED: monocopper oxidase-like protein SKU5 [Vitis vinifera]                              |
| 1778 | 864   | gi 731439997 | 81.82 | 17 | 4 | 2 | Carbamidomethylation                | 33522  | PREDICTED: phosphoglycolate phosphatase 1B chloroplastic [Vitis vinifera]                     |
| 1191 | 1587  | gi 225453350 | 81.8  | 16 | 2 | 2 |                                     | 16310  | PREDICTED: nucleoside diphosphate kinase B [Vitis vinifera]                                   |
| 836  | 1099  | gi 731418950 | 81.8  | 1  | 2 | 1 |                                     | 248350 | PREDICTED: nuclear pore complex protein GP210 [Vitis vinifera]                                |

|      |       |              |       |    |   |   |                                     |        |                                                                                                 |
|------|-------|--------------|-------|----|---|---|-------------------------------------|--------|-------------------------------------------------------------------------------------------------|
| 1006 | 915   | gi 225435203 | 81.76 | 20 | 3 | 3 |                                     | 15652  | PREDICTED: 40S ribosomal protein S23-like [Vitis vinifera]                                      |
| 1683 | 17964 | gi 566197760 | 81.72 | 26 | 3 | 3 |                                     | 14976  | hypothetical protein POPTR_0012s10220g [Populus trichocarpa]                                    |
| 1574 | 1135  | gi 225458305 | 81.63 | 6  | 2 | 1 |                                     | 62648  | PREDICTED: glucose-6-phosphate isomerase cytosolic [Vitis vinifera]                             |
| 1172 | 544   | gi 731392981 | 81.46 | 4  | 5 | 1 | Carbamidomethylation                | 102178 | PREDICTED: linoleate 13S-lipoxygenase 2-1 chloroplastic-like isoform X2 [Vitis vinifera]        |
| 1670 | 2521  | gi 225453076 | 81.45 | 5  | 3 | 3 |                                     | 80919  | PREDICTED: NADH dehydrogenase [ubiquinone] iron-sulfur protein 1 mitochondrial [Vitis vinifera] |
| 921  | 745   | gi 731406154 | 81.31 | 2  | 4 | 4 |                                     | 199529 | PREDICTED: brefeldin A-inhibited guanine nucleotide-exchange protein 5 [Vitis vinifera]         |
| 842  | 18405 | gi 224095668 | 81.25 | 6  | 2 | 1 |                                     | 35550  | hypothetical protein POPTR_0007s01850g [Populus trichocarpa]                                    |
| 874  | 17667 | gi 224086942 | 81.13 | 12 | 4 | 2 | Carbamidomethylation; Oxidation (M) | 31883  | putative esterase D family protein [Populus trichocarpa]                                        |
| 1291 | 17946 | gi 224136782 | 81.11 | 23 | 3 | 1 |                                     | 17114  | ribosomal protein S13 [Populus trichocarpa]                                                     |
| 1751 | 17674 | gi 224104643 | 81.1  | 5  | 3 | 1 |                                     | 65194  | thioredoxin family protein [Populus trichocarpa]                                                |
| 1703 | 1541  | gi 225453754 | 81.04 | 15 | 2 | 2 | Carbamidomethylation                | 23373  | PREDICTED: probable xyloglucan endotransglucosylase/hydrolase protein 19 [Vitis vinifera]       |
| 1479 | 1176  | gi 225431737 | 81.01 | 26 | 3 | 3 | Carbamidomethylation                | 14068  | PREDICTED: 60S ribosomal protein L22-2 [Vitis vinifera]                                         |
| 1024 | 18339 | gi 225462348 | 80.88 | 6  | 2 | 2 |                                     | 57728  | PREDICTED: zinc finger CCCH domain-containing protein 37 isoform X2 [Vitis vinifera]            |
| 1296 | 17636 | gi 224063625 | 80.87 | 20 | 4 | 1 | Carbamidomethylation                | 22553  | RAS 5 family protein [Populus trichocarpa]                                                      |

|      |       |              |       |    |   |   |                      |        |                                                                                            |
|------|-------|--------------|-------|----|---|---|----------------------|--------|--------------------------------------------------------------------------------------------|
| 1389 | 17732 | gi 566198611 | 80.83 | 4  | 3 | 3 |                      | 82290  | hypothetical protein POPTR_0013s00230g [Populus trichocarpa]                               |
| 1489 | 18006 | gi 224141351 | 80.54 | 5  | 3 | 2 |                      | 68914  | Structure-specific recognition protein 1 [Populus trichocarpa]                             |
| 1581 | 17691 | gi 566181655 | 80.49 | 13 | 3 | 3 |                      | 38024  | hypothetical protein POPTR_0008s01070g [Populus trichocarpa]                               |
| 1240 | 1505  | gi 731426023 | 80.47 | 30 | 2 | 1 |                      | 12464  | PREDICTED: protein SPIRAL1-like 1 isoform X2 [Vitis vinifera]                              |
| 1036 | 1011  | gi 225435878 | 80.39 | 28 | 3 | 2 |                      | 10567  | PREDICTED: 10 kDa chaperonin [Vitis vinifera]                                              |
| 1616 | 17905 | gi 224105715 | 80.29 | 7  | 3 | 3 | Carbamidomethylation | 69881  | vacuolar sorting receptor protein BP-80 [Populus trichocarpa]                              |
| 1215 | 1086  | gi 731399561 | 80.25 | 2  | 3 | 2 |                      | 187436 | PREDICTED: transcription elongation factor SPT6 [Vitis vinifera]                           |
| 1045 | 2109  | gi 225451233 | 80.09 | 9  | 2 | 1 | Carbamidomethylation | 34208  | PREDICTED: cysteine synthase [Vitis vinifera]                                              |
| 726  | 17935 | gi 566203775 | 79.91 | 14 | 4 | 4 |                      | 33272  | hypothetical protein POPTR_0014s11480g [Populus trichocarpa]                               |
| 745  | 18137 | gi 224087780 | 79.83 | 4  | 2 | 1 |                      | 65398  | pyruvate decarboxylase family protein [Populus trichocarpa]                                |
| 1354 | 2328  | gi 225435249 | 79.58 | 13 | 2 | 2 |                      | 27570  | PREDICTED: proteasome subunit beta type-4 [Vitis vinifera]                                 |
| 1202 | 942   | gi 225453935 | 79.48 | 12 | 4 | 4 |                      | 40128  | PREDICTED: 4-hydroxy-tetrahydrodipicolinate synthase chloroplastic [Vitis vinifera]        |
| 1817 | 17861 | gi 566214720 | 79.42 | 14 | 3 | 3 |                      | 27275  | Eukaryotic translation initiation factor 3 subunit 11 family protein [Populus trichocarpa] |
| 1341 | 17638 | gi 224146696 | 79.4  | 14 | 4 | 1 | Carbamidomethylation | 27517  | hypothetical protein POPTR_0019s14190g [Populus trichocarpa]                               |
| 1351 | 1323  | gi 526117539 | 79.27 | 10 | 2 | 1 | Carbamidomethylation | 34687  | class I extracellular chitinase precursor [Vitis vinifera]                                 |
| 1553 | 17838 | gi 224072208 | 79.26 | 11 | 3 | 2 | Carbamidomethylation | 38044  | UDP-glucose 4-epimerase family protein [Populus trichocarpa]                               |

|      |       |              |       |    |   |   |                      |        |                                                                                                            |
|------|-------|--------------|-------|----|---|---|----------------------|--------|------------------------------------------------------------------------------------------------------------|
| 1606 | 1512  | gi 225454123 | 79.24 | 14 | 2 | 1 |                      | 22997  | PREDICTED: pre-mRNA cleavage factor Im 25 kDa subunit 2 [Vitis vinifera]                                   |
| 675  | 1508  | gi 359476741 | 79.05 | 36 | 2 | 2 | Carbamidomethylation | 8039   | PREDICTED: 60S ribosomal protein L38 [Vitis vinifera]                                                      |
| 1292 | 18022 | gi 224112819 | 78.92 | 21 | 3 | 1 | Carbamidomethylation | 16047  | actin-depolymerizing factor family protein [Populus trichocarpa]                                           |
| 1297 | 17680 | gi 566162135 | 78.81 | 15 | 4 | 1 | Oxidation (M)        | 27086  | hypothetical protein POPTR_0003s11350g [Populus trichocarpa]                                               |
| 2080 | 1365  | gi 731401209 | 78.8  | 3  | 3 | 2 |                      | 93515  | PREDICTED: acetyl-coenzyme A carboxylase carboxyl transferase subunit alpha chloroplastic [Vitis vinifera] |
| 1380 | 17616 | gi 566182000 | 78.77 | 7  | 4 | 1 | Carbamidomethylation | 57819  | hypothetical protein POPTR_0008s02740g [Populus trichocarpa]                                               |
| 1714 | 17835 | gi 566173634 | 78.69 | 3  | 3 | 3 |                      | 121829 | hypothetical protein POPTR_0005s27880g [Populus trichocarpa]                                               |
| 1406 | 17847 | gi 566193929 | 78.68 | 10 | 4 | 1 |                      | 37642  | hypothetical protein POPTR_0011s05650g [Populus trichocarpa]                                               |
| 1177 | 18144 | gi 224073967 | 78.61 | 12 | 2 | 2 |                      | 15188  | photosystem I 11K family protein [Populus trichocarpa]                                                     |
| 1343 | 1325  | gi 731411781 | 78.59 | 10 | 2 | 2 |                      | 25284  | PREDICTED: manganese superoxide dismutase isoform X1 [Vitis vinifera]                                      |
| 1003 | 722   | gi 225430200 | 78.51 | 10 | 4 | 1 |                      | 40334  | PREDICTED: uncharacterized protein LOC100252479 [Vitis vinifera]                                           |
| 1327 | 1108  | gi 731389140 | 78.46 | 7  | 3 | 3 | Carbamidomethylation | 58551  | PREDICTED: RAN GTPase-activating protein 2 [Vitis vinifera]                                                |
| 1168 | 1064  | gi 225462285 | 78.41 | 13 | 7 | 3 |                      | 52600  | PREDICTED: inosine-5'-monophosphate dehydrogenase [Vitis vinifera]                                         |
| 858  | 992   | gi 225441912 | 78.28 | 12 | 4 | 2 | Oxidation (M)        | 30951  | PREDICTED: S-formylglutathione hydrolase isoform X4 [Vitis vinifera]                                       |

|      |       |              |       |    |   |   |                                     |        |                                                                                               |
|------|-------|--------------|-------|----|---|---|-------------------------------------|--------|-----------------------------------------------------------------------------------------------|
| 1372 | 1027  | gi 359482368 | 78.27 | 2  | 3 | 3 |                                     | 274480 | PREDICTED: pre-mRNA-processing-splicing factor 8 [Vitis vinifera]                             |
| 1042 | 938   | gi 225450669 | 78.26 | 5  | 5 | 2 |                                     | 113734 | PREDICTED: eukaryotic translation initiation factor 3 subunit A [Vitis vinifera]              |
| 530  | 1381  | gi 526117942 | 78.14 | 6  | 2 | 1 |                                     | 37456  | beta 1-3 glucanase precursor [Vitis vinifera]                                                 |
| 1173 | 17721 | gi 566171771 | 77.91 | 9  | 4 | 2 |                                     | 53299  | hypothetical protein POPTR_0005s16590g partial [Populus trichocarpa]                          |
| 1275 | 1348  | gi 225462545 | 77.87 | 18 | 3 | 3 | Carbamidomethylation                | 27262  | PREDICTED: proteasome subunit alpha type-4 [Vitis vinifera]                                   |
| 1258 | 18265 | gi 566189013 | 77.64 | 10 | 2 | 1 | Oxidation (M)                       | 30317  | glycine-rich family protein [Populus trichocarpa]                                             |
| 1390 | 18276 | gi 566208308 | 77.57 | 6  | 2 | 2 | Carbamidomethylation                | 39253  | hypothetical protein POPTR_0016s02570g [Populus trichocarpa]                                  |
| 1836 | 881   | gi 225433707 | 77.53 | 4  | 3 | 2 |                                     | 118913 | PREDICTED: probable importin-7 homolog [Vitis vinifera]                                       |
| 1288 | 3000  | gi 225453620 | 77.5  | 14 | 4 | 1 | Carbamidomethylation; Oxidation (M) | 47761  | PREDICTED: pyruvate dehydrogenase E1 component subunit alpha-3 chloroplastic [Vitis vinifera] |
| 1227 | 1526  | gi 225440674 | 77.49 | 9  | 2 | 1 | Carbamidomethylation                | 31431  | PREDICTED: chlorophyll a-b binding protein CP29.1 chloroplastic [Vitis vinifera]              |
| 588  | 783   | gi 225452120 | 77.49 | 18 | 4 | 4 |                                     | 17069  | PREDICTED: 60S ribosomal protein L26-1 [Vitis vinifera]                                       |
| 1417 | 910   | gi 225449380 | 77.44 | 17 | 5 | 2 | Carbamidomethylation                | 39535  | PREDICTED: mannose-1-phosphate guanylyltransferase 1 [Vitis vinifera]                         |
| 1464 | 1769  | gi 225461445 | 77.41 | 7  | 4 | 1 |                                     | 81247  | PREDICTED: vesicle-fusing ATPase [Vitis vinifera]                                             |
| 1433 | 17950 | gi 224105287 | 77.35 | 13 | 3 | 3 | Carbamidomethylation                | 34749  | NADP dependent sorbitol 6-phosphate dehydrogenase family protein [Populus trichocarpa]        |
| 1224 | 876   | gi 225429341 | 77.33 | 8  | 3 | 3 | Carbamidomethylation                | 44078  | PREDICTED: 3-oxo-Delta(4 5)-steroid 5-beta-reductase-like [Vitis vinifera]                    |

|      |       |              |       |    |   |   |                      |        |                                                                                                  |
|------|-------|--------------|-------|----|---|---|----------------------|--------|--------------------------------------------------------------------------------------------------|
| 1188 | 18542 | gi 224124892 | 77.32 | 13 | 2 | 1 |                      | 22641  | rhicadhesin receptor family protein [Populus trichocarpa]                                        |
| 1253 | 17785 | gi 566149444 | 77.26 | 8  | 3 | 3 |                      | 54813  | aldehyde dehydrogenase family 7 member a1 turgor responsive family protein [Populus trichocarpa] |
| 1570 | 17769 | gi 566192876 | 77.21 | 10 | 3 | 2 |                      | 47035  | hypothetical protein POPTR_0010s26170g [Populus trichocarpa]                                     |
| 1554 | 17860 | gi 224083163 | 77.21 | 4  | 3 | 1 | Carbamidomethylation | 101703 | putative translation initiation family protein [Populus trichocarpa]                             |
| 1645 | 18242 | gi 566214941 | 77.18 | 2  | 2 | 1 |                      | 107829 | elongation factor Ts family protein [Populus trichocarpa]                                        |
| 1926 | 1145  | gi 359475871 | 77.17 | 12 | 2 | 2 | Carbamidomethylation | 32719  | PREDICTED: protein MEMO1 [Vitis vinifera]                                                        |
| 1150 | 18051 | gi 566186535 | 77.17 | 4  | 4 | 2 | Carbamidomethylation | 122558 | transducin family protein [Populus trichocarpa]                                                  |
| 980  | 17648 | gi 566184227 | 77.11 | 8  | 4 | 3 |                      | 64966  | pyruvate phosphotransferase family protein [Populus trichocarpa]                                 |
| 1897 | 793   | gi 225428898 | 77.05 | 6  | 3 | 1 |                      | 62556  | PREDICTED: D-3-phosphoglycerate dehydrogenase 1 chloroplastic [Vitis vinifera]                   |
| 1205 | 18018 | gi 224083504 | 76.99 | 3  | 3 | 2 |                      | 105368 | hypothetical protein POPTR_0005s07000g [Populus trichocarpa]                                     |
| 1286 | 1338  | gi 225441385 | 76.97 | 11 | 4 | 4 |                      | 25906  | PREDICTED: 60S ribosomal protein L6-1 [Vitis vinifera]                                           |
| 992  | 1515  | gi 225439868 | 76.81 | 8  | 2 | 1 | Carbamidomethylation | 39872  | PREDICTED: diaminopimelate epimerase chloroplastic [Vitis vinifera]                              |
| 2100 | 17988 | gi 566191104 | 76.77 | 4  | 3 | 2 |                      | 81785  | hypothetical protein POPTR_0010s16210g [Populus trichocarpa]                                     |
| 1101 | 18112 | gi 224065405 | 76.75 | 28 | 2 | 2 |                      | 8817   | wound-responsive family protein [Populus trichocarpa]                                            |
| 1082 | 973   | gi 225450215 | 76.67 | 12 | 3 | 2 |                      | 26049  | PREDICTED: 60S ribosomal protein L6-3 [Vitis vinifera]                                           |

|      |       |              |       |    |   |   |                      |        |                                                                                  |
|------|-------|--------------|-------|----|---|---|----------------------|--------|----------------------------------------------------------------------------------|
| 1505 | 1879  | gi 359492060 | 76.44 | 7  | 3 | 3 | Carbamidomethylation | 46276  | PREDICTED: polyadenylate-binding protein RBP47-like [Vitis vinifera]             |
| 1794 | 890   | gi 225442223 | 76.39 | 7  | 3 | 3 |                      | 49618  | PREDICTED: glycylopeptide N-tetradecanoyltransferase 1 [Vitis vinifera]          |
| 1679 | 1643  | gi 225452186 | 76.28 | 13 | 4 | 4 |                      | 30725  | PREDICTED: prohibitin-3 mitochondrial [Vitis vinifera]                           |
| 1760 | 18326 | gi 224109088 | 76.28 | 4  | 2 | 1 | Carbamidomethylation | 57503  | SUCCINIC SEMIALDEHYDE DEHYDROGENASE family protein [Populus trichocarpa]         |
| 1270 | 1838  | gi 225440564 | 76.23 | 6  | 2 | 2 |                      | 44667  | PREDICTED: fructose-1 6-bisphosphatase chloroplastic-like [Vitis vinifera]       |
| 825  | 2509  | gi 731394072 | 76.07 | 8  | 2 | 2 |                      | 14980  | PREDICTED: 60S acidic ribosomal protein P2 isoform X1 [Vitis vinifera]           |
| 1254 | 1237  | gi 225446509 | 76.04 | 3  | 2 | 2 |                      | 77096  | PREDICTED: acyl-coenzyme A oxidase 3 peroxisomal [Vitis vinifera]                |
| 1555 | 18117 | gi 566167194 | 76.02 | 7  | 2 | 1 |                      | 41861  | glycerate dehydrogenase family protein [Populus trichocarpa]                     |
| 1174 | 858   | gi 359475902 | 75.97 | 7  | 4 | 3 | Carbamidomethylation | 61615  | PREDICTED: protein TIC 55 chloroplastic [Vitis vinifera]                         |
| 1478 | 951   | gi 731371455 | 75.97 | 8  | 4 | 2 |                      | 58282  | PREDICTED: coatomer subunit delta [Vitis vinifera]                               |
| 1631 | 1192  | gi 731382587 | 75.96 | 2  | 2 | 1 |                      | 119503 | PREDICTED: epidermal growth factor receptor substrate 15-like 1 [Vitis vinifera] |
| 2033 | 17767 | gi 566157737 | 75.95 | 4  | 3 | 3 |                      | 79950  | hypothetical protein POPTR_0002s13010g [Populus trichocarpa]                     |
| 1331 | 17774 | gi 224124820 | 75.82 | 5  | 3 | 1 |                      | 60626  | DEAD box protein P68 [Populus trichocarpa]                                       |
| 587  | 1077  | gi 225448675 | 75.8  | 10 | 2 | 2 |                      | 23332  | PREDICTED: probable chalcone--flavonone isomerase 3 [Vitis vinifera]             |
| 1432 | 1622  | gi 731406178 | 75.78 | 5  | 3 | 2 |                      | 62855  | PREDICTED: pectinesterase-like [Vitis vinifera]                                  |



|      |       |              |       |    |   |   |                      |        |                                                                                                    |
|------|-------|--------------|-------|----|---|---|----------------------|--------|----------------------------------------------------------------------------------------------------|
| 927  | 18185 | gi 566211620 | 75.77 | 7  | 2 | 1 |                      | 29136  | hypothetical protein POPTR_0017s05770g [Populus trichocarpa]                                       |
| 1585 | 18206 | gi 566207525 | 75.71 | 3  | 2 | 2 |                      | 83959  | subtilase family protein [Populus trichocarpa]                                                     |
| 1981 | 17920 | gi 224087657 | 75.65 | 11 | 3 | 3 |                      | 32555  | UNCOUPLING family protein [Populus trichocarpa]                                                    |
| 1214 | 744   | gi 359497196 | 75.61 | 15 | 3 | 2 |                      | 23133  | PREDICTED: ras-related protein RABH1e [Vitis vinifera]                                             |
| 1888 | 1251  | gi 731432083 | 75.6  | 3  | 2 | 1 |                      | 115512 | PREDICTED: protein transport protein Sec24-like At3g07100 [Vitis vinifera]                         |
| 1350 | 18388 | gi 224130478 | 75.59 | 5  | 2 | 2 |                      | 53414  | Tubulin gamma-1 chain family protein [Populus trichocarpa]                                         |
| 1402 | 1362  | gi 225440230 | 75.54 | 10 | 2 | 2 | Carbamidomethylation | 29238  | PREDICTED: dihydrofolate reductase [Vitis vinifera]                                                |
| 1276 | 3842  | gi 225433424 | 75.48 | 6  | 2 | 1 | Carbamidomethylation | 48624  | PREDICTED: 3-ketoacyl-CoA thiolase 2 peroxisomal [Vitis vinifera]                                  |
| 622  | 850   | gi 225450384 | 75.45 | 4  | 3 | 2 | Carbamidomethylation | 57022  | PREDICTED: beta-glucosidase 12-like [Vitis vinifera]                                               |
| 1781 | 18050 | gi 566187644 | 75.4  | 3  | 2 | 1 | Carbamidomethylation | 91239  | hypothetical protein POPTR_0009s12440g [Populus trichocarpa]                                       |
| 1523 | 17962 | gi 359476900 | 75.36 | 11 | 3 | 3 |                      | 40711  | PREDICTED: isocitrate dehydrogenase [NAD] regulatory subunit 1 mitochondrial-like [Vitis vinifera] |
| 1222 | 18534 | gi 224063774 | 75.35 | 4  | 3 | 3 |                      | 55604  | 3-phosphoshikimate 1-carboxyvinyltransferase family protein [Populus trichocarpa]                  |
| 1249 | 1287  | gi 225460991 | 75.33 | 4  | 2 | 1 | Carbamidomethylation | 86153  | PREDICTED: heat shock 70 kDa protein 16 [Vitis vinifera]                                           |
| 1800 | 18096 | gi 566198674 | 75.01 | 2  | 2 | 1 |                      | 120951 | hypothetical protein POPTR_0013s00590g [Populus trichocarpa]                                       |
| 1239 | 18329 | gi 224120174 | 74.9  | 2  | 2 | 1 |                      | 68576  | Phosphoglucomutase family protein [Populus trichocarpa]                                            |

|      |       |              |       |    |   |   |                      |       |                                                                                                      |
|------|-------|--------------|-------|----|---|---|----------------------|-------|------------------------------------------------------------------------------------------------------|
| 1135 | 931   | gi 225434323 | 74.84 | 14 | 4 | 1 | Carbamidomethylation | 30353 | PREDICTED: eukaryotic translation initiation factor 2 subunit beta [Vitis vinifera]                  |
| 1142 | 1384  | gi 225437898 | 74.71 | 15 | 3 | 2 |                      | 15168 | PREDICTED: photosystem I reaction center subunit IV B chloroplastic-like [Vitis vinifera]            |
| 1151 | 837   | gi 731425891 | 74.65 | 12 | 3 | 2 |                      | 31554 | PREDICTED: hypersensitive-induced response protein 1 isoform X2 [Vitis vinifera]                     |
| 1747 | 18040 | gi 566174827 | 74.57 | 4  | 3 | 1 | Carbamidomethylation | 86014 | hypothetical protein POPTR_0006s06460g [Populus trichocarpa]                                         |
| 1234 | 17900 | gi 224104697 | 74.44 | 16 | 3 | 1 |                      | 20848 | lactoylglutathione lyase family protein [Populus trichocarpa]                                        |
| 1400 | 1201  | gi 225454278 | 74.4  | 6  | 2 | 2 |                      | 40499 | PREDICTED: bifunctional L-3-cyanoalanine synthase/cysteine synthase 1 mitochondrial [Vitis vinifera] |
| 1409 | 976   | gi 731405314 | 74.36 | 4  | 3 | 2 |                      | 97279 | PREDICTED: serine/threonine-protein phosphatase 6 regulatory subunit 2 [Vitis vinifera]              |
| 907  | 18175 | gi 566202597 | 74.32 | 17 | 2 | 1 |                      | 16336 | hypothetical protein POPTR_0014s04880g [Populus trichocarpa]                                         |
| 1119 | 1386  | gi 225434203 | 74.3  | 8  | 3 | 1 | Carbamidomethylation | 38265 | PREDICTED: 2-alkenal reductase (NADP(+)-dependent) [Vitis vinifera]                                  |
| 876  | 920   | gi 225436438 | 74.25 | 34 | 3 | 3 |                      | 10607 | PREDICTED: cyclin-dependent kinases regulatory subunit 1 [Vitis vinifera]                            |
| 1780 | 1344  | gi 225454138 | 74.23 | 7  | 3 | 3 | Carbamidomethylation | 55947 | PREDICTED: DEAD-box ATP-dependent RNA helicase 8 [Vitis vinifera]                                    |
| 1237 | 17901 | gi 566170058 | 74.15 | 7  | 3 | 3 | Carbamidomethylation | 65727 | hypothetical protein POPTR_0005s07720g [Populus trichocarpa]                                         |
| 1221 | 1211  | gi 731391365 | 74.01 | 6  | 3 | 1 | Carbamidomethylation | 52738 | PREDICTED: acetolactate synthase small subunit 2 chloroplastic isoform X2 [Vitis vinifera]           |

|      |       |              |       |    |   |   |                      |        |                                                                           |
|------|-------|--------------|-------|----|---|---|----------------------|--------|---------------------------------------------------------------------------|
| 1080 | 17581 | gi 566187534 | 73.87 | 7  | 4 | 4 |                      | 50027  | cyclase associated protein 1 [Populus trichocarpa]                        |
| 1458 | 17863 | gi 566211408 | 73.8  | 9  | 4 | 1 |                      | 37992  | hypothetical protein POPTR_0017s04750g [Populus trichocarpa]              |
| 1359 | 3226  | gi 526118000 | 73.79 | 13 | 2 | 1 |                      | 22732  | germin-like protein 2 precursor [Vitis vinifera]                          |
| 1498 | 2197  | gi 526118093 | 73.68 | 13 | 2 | 2 | Carbamidomethylation | 22511  | type II peroxiredoxin E [Vitis vinifera]                                  |
| 1948 | 1628  | gi 359482834 | 73.65 | 8  | 3 | 1 |                      | 49834  | PREDICTED: WD-40 repeat-containing protein MSI4 [Vitis vinifera]          |
| 1180 | 1542  | gi 225458237 | 73.61 | 9  | 2 | 1 | Carbamidomethylation | 29571  | PREDICTED: gamma carbonic anhydrase 1 mitochondrial [Vitis vinifera]      |
| 1578 | 1304  | gi 359475330 | 73.59 | 14 | 2 | 2 |                      | 16329  | PREDICTED: glycine-rich RNA-binding protein GRP2A [Vitis vinifera]        |
| 1357 | 18063 | gi 566168268 | 73.46 | 16 | 3 | 1 | Carbamidomethylation | 22487  | GTP-binding family protein [Populus trichocarpa]                          |
| 1864 | 18286 | gi 566188208 | 73.35 | 2  | 2 | 2 |                      | 139500 | TITAN7 family protein [Populus trichocarpa]                               |
| 1445 | 18061 | gi 566211774 | 73.23 | 9  | 3 | 2 |                      | 40195  | hypothetical protein POPTR_0017s06410g [Populus trichocarpa]              |
| 1556 | 18123 | gi 566212877 | 73.22 | 4  | 2 | 1 | Carbamidomethylation | 57107  | hypothetical protein POPTR_0017s12170g [Populus trichocarpa]              |
| 503  | 914   | gi 225440109 | 73.21 | 25 | 4 | 2 |                      | 10658  | PREDICTED: 10 kDa chaperonin [Vitis vinifera]                             |
| 1767 | 1372  | gi 225462440 | 73.07 | 2  | 2 | 2 |                      | 107317 | PREDICTED: serine/threonine-protein phosphatase BSL3 [Vitis vinifera]     |
| 1736 | 1297  | gi 359489218 | 72.91 | 6  | 3 | 3 | Carbamidomethylation | 90315  | PREDICTED: nucleolin [Vitis vinifera]                                     |
| 1423 | 970   | gi 731413121 | 72.86 | 18 | 3 | 1 |                      | 15960  | PREDICTED: actin-depolymerizing factor 2-like isoform X2 [Vitis vinifera] |

|      |       |              |       |    |   |   |                      |        |                                                                                              |
|------|-------|--------------|-------|----|---|---|----------------------|--------|----------------------------------------------------------------------------------------------|
| 1739 | 17713 | gi 224100535 | 72.82 | 5  | 3 | 1 |                      | 67584  | hypothetical protein POPTR_0008s01000g [Populus trichocarpa]                                 |
| 2151 | 17930 | gi 566208589 | 72.81 | 6  | 3 | 1 |                      | 56137  | dyskerin family protein [Populus trichocarpa]                                                |
| 1128 | 17984 | gi 224078816 | 72.77 | 9  | 3 | 1 |                      | 36460  | Leucoanthocyanidin reductase family protein [Populus trichocarpa]                            |
| 1312 | 17866 | gi 566215051 | 72.72 | 4  | 3 | 2 |                      | 106250 | hypothetical protein POPTR_0018s09690g [Populus trichocarpa]                                 |
| 1544 | 18331 | gi 566174691 | 72.67 | 5  | 2 | 2 |                      | 63982  | tubulin-specific chaperone C-related family protein [Populus trichocarpa]                    |
| 1719 | 18675 | gi 566175530 | 72.66 | 8  | 2 | 1 | Carbamidomethylation | 39660  | hypothetical protein POPTR_0006s10360g [Populus trichocarpa]                                 |
| 1605 | 18439 | gi 224081475 | 72.63 | 5  | 2 | 2 |                      | 58488  | hypothetical protein POPTR_0005s10320g [Populus trichocarpa]                                 |
| 1439 | 1602  | gi 225449234 | 72.54 | 22 | 2 | 2 |                      | 12856  | PREDICTED: 60S ribosomal protein L35a-1 [Vitis vinifera]                                     |
| 1925 | 18205 | gi 224054120 | 72.35 | 4  | 2 | 2 |                      | 73852  | lecithin:cholesterol acyltransferase family protein [Populus trichocarpa]                    |
| 1673 | 18188 | gi 566147227 | 72.17 | 3  | 2 | 2 |                      | 110034 | hypothetical protein POPTR_0001s04700g [Populus trichocarpa]                                 |
| 1277 | 18416 | gi 224071567 | 72.16 | 4  | 2 | 1 |                      | 65821  | monocopper oxidase precursor family protein [Populus trichocarpa]                            |
| 645  | 719   | gi 225424242 | 72.15 | 40 | 4 | 1 |                      | 10611  | PREDICTED: 10 kDa chaperonin [Vitis vinifera]                                                |
| 1575 | 18273 | gi 224106686 | 72.06 | 10 | 2 | 1 |                      | 24434  | elongation factor 1B alpha-subunit 2 family protein [Populus trichocarpa]                    |
| 1348 | 17644 | gi 566245781 | 71.92 | 13 | 4 | 1 |                      | 30429  | Eukaryotic translation initiation factor 2 beta subunit family protein [Populus trichocarpa] |

|      |       |              |       |    |   |   |                      |       |                                                                                           |
|------|-------|--------------|-------|----|---|---|----------------------|-------|-------------------------------------------------------------------------------------------|
| 2086 | 18372 | gi 566167797 | 71.92 | 12 | 2 | 2 |                      | 29714 | hypothetical protein POPTR_0004s21400g [Populus trichocarpa]                              |
| 1839 | 18136 | gi 224109362 | 71.89 | 10 | 2 | 2 |                      | 31536 | Eukaryotic translation initiation factor 3 subunit 5 family protein [Populus trichocarpa] |
| 1597 | 782   | gi 225458719 | 71.85 | 6  | 3 | 1 | Oxidation (M)        | 63799 | PREDICTED: D-3-phosphoglycerate dehydrogenase 3 chloroplastic-like [Vitis vinifera]       |
| 1759 | 18295 | gi 224107711 | 71.82 | 8  | 2 | 2 |                      | 35785 | b-keto acyl reductase family protein [Populus trichocarpa]                                |
| 401  | 1367  | gi 526118089 | 71.79 | 11 | 3 | 3 |                      | 17263 | type II peroxiredoxin C [Vitis vinifera]                                                  |
| 1984 | 18662 | gi 566201753 | 71.78 | 10 | 2 | 2 | Carbamidomethylation | 34979 | hypothetical protein POPTR_0014s01090g [Populus trichocarpa]                              |
| 623  | 1653  | gi 225429975 | 71.71 | 6  | 2 | 1 |                      | 39098 | PREDICTED: bark storage protein A [Vitis vinifera]                                        |
| 1932 | 18659 | gi 224055093 | 71.56 | 13 | 2 | 2 |                      | 22171 | hypothetical protein POPTR_0001s26920g [Populus trichocarpa]                              |
| 1821 | 18494 | gi 224066943 | 71.53 | 6  | 3 | 3 |                      | 35968 | annexin 1 family protein [Populus trichocarpa]                                            |
| 1435 | 1626  | gi 359482440 | 71.43 | 5  | 3 | 3 | Carbamidomethylation | 57853 | PREDICTED: alanine aminotransferase 2 [Vitis vinifera]                                    |
| 1805 | 18395 | gi 566182365 | 71.41 | 8  | 2 | 2 |                      | 34377 | hypothetical protein POPTR_0008s04660g [Populus trichocarpa]                              |
| 1755 | 18049 | gi 566147740 | 71.24 | 11 | 3 | 2 |                      | 36450 | hypothetical protein POPTR_0001s07480g [Populus trichocarpa]                              |
| 1658 | 18304 | gi 566184588 | 71.05 | 9  | 2 | 1 |                      | 33826 | hypothetical protein POPTR_0008s17880g [Populus trichocarpa]                              |
| 1425 | 1946  | gi 225440849 | 71.05 | 28 | 2 | 2 |                      | 8952  | PREDICTED: probable small nuclear ribonucleoprotein G [Vitis vinifera]                    |
| 1473 | 1181  | gi 731387206 | 70.99 | 5  | 2 | 2 |                      | 62778 | PREDICTED: splicing factor U2af large subunit B isoform X2 [Vitis vinifera]               |

|      |       |              |       |    |   |   |                      |       |                                                                             |
|------|-------|--------------|-------|----|---|---|----------------------|-------|-----------------------------------------------------------------------------|
| 1228 | 1439  | gi 731428465 | 70.85 | 6  | 3 | 3 |                      | 37487 | PREDICTED: thylakoid luminal 29 kDa protein chloroplastic [Vitis vinifera]  |
| 998  | 17994 | gi 566158382 | 70.81 | 4  | 3 | 3 |                      | 77765 | hypothetical protein POPTR_0002s16570g [Populus trichocarpa]                |
| 1933 | 18666 | gi 566197993 | 70.79 | 8  | 2 | 1 |                      | 29095 | hypothetical protein POPTR_0012s11630g [Populus trichocarpa]                |
| 1185 | 1405  | gi 225433434 | 70.76 | 6  | 3 | 3 |                      | 65411 | PREDICTED: dihydroxy-acid dehydratase chloroplastic [Vitis vinifera]        |
| 1451 | 18861 | gi 566159684 | 70.74 | 4  | 2 | 1 | Oxidation (M)        | 72140 | hypothetical protein POPTR_0002s23950g [Populus trichocarpa]                |
| 1320 | 1842  | gi 225447176 | 70.63 | 4  | 2 | 1 |                      | 46608 | PREDICTED: protein disulfide isomerase-like 2-3 [Vitis vinifera]            |
| 1263 | 18113 | gi 224140305 | 70.57 | 7  | 2 | 1 |                      | 34792 | hypothetical protein POPTR_0016s10400g [Populus trichocarpa]                |
| 1531 | 2325  | gi 225443274 | 70.52 | 8  | 2 | 2 |                      | 35506 | PREDICTED: cell wall integrity protein scw1 [Vitis vinifera]                |
| 1124 | 17675 | gi 566198526 | 70.49 | 5  | 4 | 2 |                      | 67271 | hypothetical protein POPTR_0012s14780g [Populus trichocarpa]                |
| 2154 | 2552  | gi 731393274 | 70.39 | 3  | 2 | 1 |                      | 76795 | PREDICTED: uncharacterized protein LOC100253534 isoform X2 [Vitis vinifera] |
| 1766 | 17966 | gi 566191728 | 70.39 | 6  | 3 | 1 | Carbamidomethylation | 64682 | hypothetical protein POPTR_0010s19790g [Populus trichocarpa]                |
| 1909 | 1844  | gi 731439310 | 70.32 | 2  | 1 | 1 |                      | 71338 | PREDICTED: fumarylacetoacetase isoform X2 [Vitis vinifera]                  |
| 1959 | 2587  | gi 359480790 | 70.29 | 4  | 2 | 1 |                      | 64379 | PREDICTED: patellin-3-like [Vitis vinifera]                                 |
| 485  | 18717 | gi 224059156 | 70.18 | 18 | 2 | 1 |                      | 14119 | Profilin 3 family protein [Populus trichocarpa]                             |

|      |       |              |       |    |   |   |                      |        |                                                                                                            |
|------|-------|--------------|-------|----|---|---|----------------------|--------|------------------------------------------------------------------------------------------------------------|
| 1671 | 1478  | gi 225460855 | 70.05 | 5  | 3 | 2 | Carbamidomethylation | 61200  | PREDICTED: trigger factor-like protein TIG Chloroplastic [Vitis vinifera]                                  |
| 1399 | 18130 | gi 566160621 | 69.95 | 5  | 3 | 1 |                      | 55240  | DEAD box RNA helicase family protein [Populus trichocarpa]                                                 |
| 1709 | 19451 | gi 566160279 | 69.81 | 5  | 1 | 1 |                      | 36389  | hypothetical protein POPTR_0003s01450g [Populus trichocarpa]                                               |
| 1529 | 1623  | gi 225437378 | 69.77 | 17 | 2 | 2 | Carbamidomethylation | 11879  | PREDICTED: small nuclear ribonucleoprotein Sm D2-like [Vitis vinifera]                                     |
| 1901 | 18333 | gi 224111390 | 69.6  | 7  | 2 | 1 | Carbamidomethylation | 32619  | transport protein SEC13 [Populus trichocarpa]                                                              |
| 1717 | 18181 | gi 566177775 | 69.59 | 6  | 2 | 2 |                      | 35282  | hypothetical protein POPTR_0006s23520g [Populus trichocarpa]                                               |
| 2214 | 5417  | gi 731391337 | 69.49 | 7  | 2 | 1 | Carbamidomethylation | 45764  | PREDICTED: mitogen-activated protein kinase homolog MMK1 [Vitis vinifera]                                  |
| 1700 | 18572 | gi 566204149 | 69.47 | 4  | 2 | 1 | Carbamidomethylation | 82263  | hypothetical protein POPTR_0014s13710g [Populus trichocarpa]                                               |
| 1485 | 2088  | gi 731379285 | 69.43 | 9  | 2 | 2 |                      | 27000  | PREDICTED: probable phospholipid hydroperoxide glutathione peroxidase [Vitis vinifera]                     |
| 1586 | 18209 | gi 566170408 | 69.35 | 2  | 2 | 2 |                      | 106236 | alanyl-tRNA synthetase family protein [Populus trichocarpa]                                                |
| 1900 | 18153 | gi 566188415 | 69.3  | 4  | 2 | 2 |                      | 64285  | hypothetical protein POPTR_0009s17070g [Populus trichocarpa]                                               |
| 1106 | 18715 | gi 224107783 | 69.27 | 12 | 2 | 1 | Carbamidomethylation | 16476  | hypothetical protein POPTR_0010s05590g [Populus trichocarpa]                                               |
| 1525 | 2467  | gi 225450774 | 69.27 | 9  | 2 | 2 |                      | 35393  | PREDICTED: ATP-dependent Clp protease proteolytic subunit-related protein 3 chloroplastic [Vitis vinifera] |

|      |       |              |       |    |   |   |                      |        |                                                                  |
|------|-------|--------------|-------|----|---|---|----------------------|--------|------------------------------------------------------------------|
| 2153 | 18189 | gi 224085886 | 69.21 | 4  | 2 | 2 | Carbamidomethylation | 63489  | hypothetical protein POPTR_0005s26090g [Populus trichocarpa]     |
| 1695 | 18292 | gi 566158822 | 69.17 | 8  | 2 | 2 |                      | 39133  | serine/threonine protein kinase [Populus trichocarpa]            |
| 774  | 1101  | gi 225434062 | 69.12 | 13 | 3 | 2 | Carbamidomethylation | 28430  | PREDICTED: chitinase 5-like [Vitis vinifera]                     |
| 1716 | 1094  | gi 225461050 | 68.99 | 6  | 2 | 2 |                      | 49698  | PREDICTED: tryptophan synthase beta chain 1 [Vitis vinifera]     |
| 994  | 17669 | gi 566185352 | 68.94 | 5  | 4 | 1 |                      | 79054  | hypothetical protein POPTR_0008s22410g [Populus trichocarpa]     |
| 1674 | 18207 | gi 224077052 | 68.91 | 2  | 2 | 2 |                      | 121102 | guanylate-binding family protein [Populus trichocarpa]           |
| 1803 | 3543  | gi 225430488 | 68.91 | 3  | 2 | 1 |                      | 73594  | PREDICTED: transmembrane 9 superfamily member 9 [Vitis vinifera] |
| 1652 | 2038  | gi 526117828 | 68.88 | 12 | 2 | 1 |                      | 16599  | serine/threonine kinase-like [Vitis vinifera]                    |
| 1569 | 17693 | gi 224091819 | 68.87 | 3  | 3 | 1 |                      | 88349  | MIF4G domain-containing family protein [Populus trichocarpa]     |
| 1091 | 18417 | gi 566195824 | 68.84 | 3  | 3 | 1 |                      | 60887  | hypothetical protein POPTR_0011s16410g [Populus trichocarpa]     |
| 1669 | 2043  | gi 225428141 | 68.77 | 7  | 3 | 3 |                      | 68945  | PREDICTED: SEC1 family transport protein SLY1 [Vitis vinifera]   |
| 1105 | 18711 | gi 224128708 | 68.72 | 7  | 2 | 1 |                      | 33828  | xyloglucan endo-1 family protein [Populus trichocarpa]           |
| 1757 | 18204 | gi 566175538 | 68.69 | 2  | 1 | 1 |                      | 96436  | hypothetical protein POPTR_0006s10420g [Populus trichocarpa]     |
| 1512 | 1309  | gi 731398937 | 68.68 | 15 | 2 | 1 | Carbamidomethylation | 21183  | PREDICTED: actin-depolymerizing factor 1-like [Vitis vinifera]   |
| 1592 | 1863  | gi 359487567 | 68.64 | 4  | 2 | 2 | Carbamidomethylation | 41694  | PREDICTED: GDSE esterase/lipase At1g09390 [Vitis vinifera]       |
| 1804 | 18228 | gi 224065629 | 68.59 | 15 | 2 | 2 | Carbamidomethylation | 16418  | CP12 domain-containing family protein [Populus trichocarpa]      |



|      |       |              |       |    |   |   |                      |       |                                                                                   |
|------|-------|--------------|-------|----|---|---|----------------------|-------|-----------------------------------------------------------------------------------|
| 1772 | 1218  | gi 731413519 | 68.52 | 5  | 2 | 2 |                      | 48243 | PREDICTED: vacuolar protein sorting-associated protein 4 [Vitis vinifera]         |
| 1588 | 1567  | gi 225433215 | 68.5  | 9  | 2 | 2 | Carbamidomethylation | 26277 | PREDICTED: DAG protein chloroplastic [Vitis vinifera]                             |
| 1816 | 1116  | gi 225463618 | 68.41 | 6  | 3 | 1 | Carbamidomethylation | 80442 | PREDICTED: pyrophosphate-energized vacuolar membrane proton pump [Vitis vinifera] |
| 533  | 1060  | gi 225432662 | 68.34 | 14 | 3 | 3 |                      | 17620 | PREDICTED: 40S ribosomal protein S18 [Vitis vinifera]                             |
| 1799 | 2232  | gi 225459360 | 68.18 | 6  | 3 | 1 |                      | 56704 | PREDICTED: probable glucan 1 3-beta-glucosidase A [Vitis vinifera]                |
| 1226 | 18015 | gi 224116326 | 67.83 | 9  | 3 | 1 |                      | 36463 | Leucoanthocyanidin reductase family protein [Populus trichocarpa]                 |
| 1509 | 18384 | gi 224146080 | 67.76 | 14 | 2 | 2 |                      | 17003 | hypothetical protein POPTR_0019s05840g [Populus trichocarpa]                      |
| 1431 | 17864 | gi 566153954 | 67.75 | 10 | 3 | 1 |                      | 31003 | phosphatase 2C family protein [Populus trichocarpa]                               |
| 1743 | 18308 | gi 731406703 | 67.66 | 4  | 2 | 2 |                      | 66565 | PREDICTED: arginine--tRNA ligase cytoplasmic-like isoform X2 [Vitis vinifera]     |
| 1835 | 17772 | gi 566168111 | 67.65 | 10 | 3 | 1 |                      | 43492 | hypothetical protein POPTR_0004s22790g [Populus trichocarpa]                      |
| 1490 | 2011  | gi 731437310 | 67.64 | 7  | 3 | 1 | Carbamidomethylation | 52411 | PREDICTED: acetolactate synthase small subunit 2 chloroplastic [Vitis vinifera]   |
| 1904 | 1412  | gi 225427234 | 67.6  | 14 | 2 | 2 |                      | 17554 | PREDICTED: glycine cleavage system H protein mitochondrial [Vitis vinifera]       |
| 1360 | 1588  | gi 225429995 | 67.53 | 13 | 2 | 1 | Carbamidomethylation | 17724 | PREDICTED: protein PEROXIN-4 [Vitis vinifera]                                     |
| 1680 | 17711 | gi 224122948 | 67.51 | 4  | 3 | 1 |                      | 79226 | inorganic pyrophosphatase family protein [Populus trichocarpa]                    |
| 1587 | 18220 | gi 566152765 | 67.48 | 5  | 2 | 2 |                      | 49287 | hypothetical protein POPTR_0001s34620g [Populus trichocarpa]                      |

|      |       |              |       |    |   |   |                      |        |                                                                                           |
|------|-------|--------------|-------|----|---|---|----------------------|--------|-------------------------------------------------------------------------------------------|
| 1511 | 18493 | gi 566164895 | 67.48 | 10 | 2 | 1 |                      | 24783  | hypothetical protein POPTR_0004s044401g partial [Populus trichocarpa]                     |
| 2393 | 2099  | gi 225426826 | 67.32 | 7  | 2 | 2 |                      | 36763  | PREDICTED: replication factor C subunit 2 [Vitis vinifera]                                |
| 568  | 19286 | gi 566208913 | 67.2  | 3  | 2 | 1 |                      | 37900  | hypothetical protein POPTR_0016s05800g [Populus trichocarpa]                              |
| 1347 | 17633 | gi 224109084 | 67.14 | 9  | 5 | 1 |                      | 53455  | inosine monophosphate dehydrogenase family protein [Populus trichocarpa]                  |
| 2087 | 18379 | gi 566182095 | 67.13 | 6  | 2 | 1 |                      | 48288  | hypothetical protein POPTR_0008s03160g [Populus trichocarpa]                              |
| 1568 | 1358  | gi 731409226 | 67.11 | 6  | 2 | 1 |                      | 43860  | PREDICTED: 3-hydroxyisobutyryl-CoA hydrolase-like protein 5 [Vitis vinifera]              |
| 1005 | 18393 | gi 224100515 | 67.1  | 9  | 2 | 2 |                      | 45833  | hypothetical protein POPTR_0008s00700g [Populus trichocarpa]                              |
| 1647 | 18387 | gi 566160574 | 67.03 | 5  | 2 | 1 |                      | 57226  | serine/threonine protein phosphatase 2A 55 kDa regulatory subunit B [Populus trichocarpa] |
| 1985 | 1545  | gi 225451299 | 67.01 | 10 | 2 | 2 |                      | 30245  | PREDICTED: probable ribose-5-phosphate isomerase 3 chloroplastic [Vitis vinifera]         |
| 1557 | 1481  | gi 731415988 | 66.99 | 2  | 2 | 1 |                      | 119890 | PREDICTED: FACT complex subunit SPT16-like [Vitis vinifera]                               |
| 2210 | 1979  | gi 731436817 | 66.83 | 5  | 2 | 2 |                      | 49774  | PREDICTED: cysteine desulfurase 1 mitochondrial-like [Vitis vinifera]                     |
| 1641 | 842   | gi 731424103 | 66.8  | 3  | 3 | 1 | Carbamidomethylation | 151229 | PREDICTED: tripeptidyl-peptidase 2 isoform X1 [Vitis vinifera]                            |
| 1686 | 6864  | gi 359475352 | 66.79 | 3  | 1 | 1 |                      | 49145  | PREDICTED: uncharacterized protein At4g06744 [Vitis vinifera]                             |
| 1796 | 17856 | gi 731401507 | 66.68 | 3  | 3 | 3 |                      | 138211 | PREDICTED: 5-oxoprolinase [Vitis vinifera]                                                |
| 792  | 1269  | gi 225459906 | 66.67 | 5  | 2 | 1 |                      | 34942  | PREDICTED: probable fructokinase-5 [Vitis vinifera]                                       |

|      |       |              |       |    |   |   |                      |        |                                                                                               |
|------|-------|--------------|-------|----|---|---|----------------------|--------|-----------------------------------------------------------------------------------------------|
| 1178 | 18154 | gi 224130362 | 66.64 | 6  | 2 | 1 |                      | 42752  | MAP kinase family protein [Populus trichocarpa]                                               |
| 1784 | 1831  | gi 225426811 | 66.57 | 6  | 2 | 1 |                      | 39029  | PREDICTED: bifunctional UDP-glucose 4-epimerase and UDP-xylose 4-epimerase 1 [Vitis vinifera] |
| 1164 | 18545 | gi 566170295 | 66.51 | 3  | 2 | 1 | Oxidation (M)        | 119716 | Valyl-tRNA synthetase family protein [Populus trichocarpa]                                    |
| 2058 | 18336 | gi 566207035 | 66.48 | 2  | 1 | 1 |                      | 62799  | hypothetical protein POPTR_0015s11280g [Populus trichocarpa]                                  |
| 1691 | 921   | gi 731382079 | 66.47 | 3  | 3 | 3 |                      | 110376 | PREDICTED: neutral alpha-glucosidase C-like isoform X2 [Vitis vinifera]                       |
| 1660 | 18355 | gi 224084344 | 66.46 | 7  | 2 | 2 |                      | 40622  | RNA recognition motif-containing family protein [Populus trichocarpa]                         |
| 770  | 18599 | gi 224135091 | 66.46 | 6  | 2 | 2 |                      | 24193  | hypothetical protein POPTR_0015s01130g [Populus trichocarpa]                                  |
| 1299 | 1671  | gi 731424196 | 66.41 | 13 | 2 | 1 |                      | 18730  | PREDICTED: pre-mRNA cleavage factor Im 25 kDa subunit 2 isoform X2 [Vitis vinifera]           |
| 805  | 2307  | gi 225441664 | 66.37 | 5  | 1 | 1 |                      | 36307  | PREDICTED: uncharacterized protein LOC100255512 [Vitis vinifera]                              |
| 1437 | 1933  | gi 225455762 | 66.23 | 3  | 2 | 2 |                      | 67078  | PREDICTED: probable phenylalanine--tRNA ligase beta subunit [Vitis vinifera]                  |
| 1872 | 3224  | gi 225435122 | 66.22 | 3  | 3 | 1 | Carbamidomethylation | 116639 | PREDICTED: calcium-transporting ATPase 4 endoplasmic reticulum-type-like [Vitis vinifera]     |
| 1966 | 18830 | gi 566214901 | 66.21 | 5  | 1 | 1 |                      | 35399  | hypothetical protein POPTR_0018s08850g [Populus trichocarpa]                                  |
| 1893 | 17849 | gi 566211354 | 66.12 | 11 | 3 | 1 |                      | 34355  | phosphatase 2C family protein [Populus trichocarpa]                                           |

|      |       |              |       |    |   |   |                      |       |                                                                                               |
|------|-------|--------------|-------|----|---|---|----------------------|-------|-----------------------------------------------------------------------------------------------|
| 1353 | 1611  | gi 731417625 | 66.07 | 12 | 2 | 2 |                      | 19282 | PREDICTED: uncharacterized protein LOC100241624 [Vitis vinifera]                              |
| 1107 | 1812  | gi 225430510 | 66.03 | 6  | 3 | 3 |                      | 27121 | PREDICTED: phospholipid hydroperoxide glutathione peroxidase 1 chloroplastic [Vitis vinifera] |
| 1930 | 18447 | gi 359474555 | 65.98 | 6  | 2 | 2 |                      | 43514 | PREDICTED: probable ADP-ribosylation factor GTPase-activating protein AGD8 [Vitis vinifera]   |
| 1725 | 2319  | gi 225452270 | 65.98 | 6  | 2 | 1 |                      | 34598 | PREDICTED: 28 kDa ribonucleoprotein chloroplastic-like [Vitis vinifera]                       |
| 592  | 1307  | gi 225463506 | 65.97 | 7  | 2 | 2 |                      | 38294 | PREDICTED: fructose-bisphosphate aldolase cytoplasmic isozyme 1 [Vitis vinifera]              |
| 1818 | 3118  | gi 359484223 | 65.78 | 3  | 3 | 1 | Carbamidomethylation | 85770 | PREDICTED: probable galactinol-sucrose galactosyltransferase 6 [Vitis vinifera]               |
| 1619 | 18678 | gi 566210985 | 65.66 | 6  | 2 | 1 | Carbamidomethylation | 51941 | glycosyl hydrolase family 17 family protein [Populus trichocarpa]                             |
| 1620 | 1371  | gi 225469850 | 65.63 | 6  | 2 | 2 |                      | 39160 | PREDICTED: uncharacterized protein DDB_G0288133 [Vitis vinifera]                              |
| 1889 | 1982  | gi 731402641 | 65.58 | 5  | 1 | 1 |                      | 35414 | PREDICTED: cytochrome c1-2 heme protein mitochondrial-like isoform X3 [Vitis vinifera]        |
| 1025 | 1485  | gi 731439529 | 65.57 | 2  | 1 | 1 |                      | 66300 | PREDICTED: splicing factor 3B subunit 2 [Vitis vinifera]                                      |
| 1232 | 1619  | gi 225461983 | 65.5  | 7  | 3 | 1 |                      | 36179 | PREDICTED: heterogeneous nuclear ribonucleoprotein 1 [Vitis vinifera]                         |
| 2158 | 2125  | gi 731415654 | 65.48 | 3  | 2 | 2 |                      | 73684 | PREDICTED: acyl-CoA-binding domain-containing protein 4-like isoform X2 [Vitis vinifera]      |
| 1962 | 18679 | gi 225443109 | 65.39 | 10 | 2 | 2 | Carbamidomethylation | 38454 | PREDICTED: protein RAE1 [Vitis vinifera]                                                      |

|      |       |              |       |    |   |   |                                     |        |                                                                                       |
|------|-------|--------------|-------|----|---|---|-------------------------------------|--------|---------------------------------------------------------------------------------------|
| 1398 | 1079  | gi 225445949 | 65.34 | 5  | 3 | 2 | Carbamidomethylation                | 49372  | PREDICTED: KH domain-containing protein At4g18375 [Vitis vinifera]                    |
| 1508 | 18213 | gi 224118508 | 65.28 | 7  | 2 | 2 |                                     | 39734  | Chain A family protein [Populus trichocarpa]                                          |
| 1496 | 1995  | gi 731412542 | 65.27 | 3  | 2 | 2 |                                     | 58149  | PREDICTED: uncharacterized protein LOC100244432 isoform X4 [Vitis vinifera]           |
| 1819 | 18252 | gi 224081300 | 65.24 | 5  | 2 | 1 |                                     | 50528  | 26S proteasome regulatory subunit family protein [Populus trichocarpa]                |
| 1722 | 1667  | gi 225432306 | 65.22 | 22 | 2 | 2 | Carbamidomethylation                | 9210   | PREDICTED: 40S ribosomal protein S21 [Vitis vinifera]                                 |
| 1318 | 18109 | gi 566168240 | 65.19 | 3  | 2 | 1 | Carbamidomethylation                | 55680  | hypothetical protein POPTR_0004s23390g [Populus trichocarpa]                          |
| 1484 | 18065 | gi 224100909 | 65.19 | 2  | 3 | 1 |                                     | 134447 | splicing factor family protein [Populus trichocarpa]                                  |
| 1058 | 1665  | gi 225459083 | 65.18 | 6  | 2 | 2 | Carbamidomethylation; Oxidation (M) | 58401  | PREDICTED: argininosuccinate lyase chloroplastic [Vitis vinifera]                     |
| 1411 | 18221 | gi 566206893 | 65.18 | 4  | 2 | 2 |                                     | 52011  | hypothetical protein POPTR_0015s10280g [Populus trichocarpa]                          |
| 2349 | 18762 | gi 566160631 | 65.11 | 2  | 1 | 1 |                                     | 73609  | endomembrane protein 70 [Populus trichocarpa]                                         |
| 1720 | 18739 | gi 566186085 | 65.09 | 16 | 2 | 1 |                                     | 14506  | hypothetical protein POPTR_0009s03370g partial [Populus trichocarpa]                  |
| 1442 | 19692 | gi 568244583 | 65.02 | 7  | 2 | 2 |                                     | 21881  | clp protease proteolytic subunit (plastid) [Camellia oleifera]                        |
| 2123 | 18303 | gi 566160558 | 65    | 5  | 2 | 2 | Carbamidomethylation                | 54211  | UBIQUITIN-SPECIFIC PROTEASE 6 family protein [Populus trichocarpa]                    |
| 1259 | 1593  | gi 359497369 | 64.9  | 4  | 2 | 1 | Carbamidomethylation                | 64520  | PREDICTED: eukaryotic translation initiation factor 3 subunit D-like [Vitis vinifera] |
| 2025 | 18244 | gi 566198992 | 64.85 | 4  | 2 | 2 | Carbamidomethylation                | 78312  | hypothetical protein POPTR_0013s02400g [Populus trichocarpa]                          |

|      |       |              |       |    |   |   |                      |        |                                                                                            |
|------|-------|--------------|-------|----|---|---|----------------------|--------|--------------------------------------------------------------------------------------------|
| 1954 | 18467 | gi 566253285 | 64.8  | 9  | 2 | 1 |                      | 36419  | hypothetical protein POPTR_1567s00200g partial [Populus trichocarpa]                       |
| 1608 | 998   | gi 225435024 | 64.79 | 9  | 2 | 1 |                      | 25842  | PREDICTED: THO complex subunit 4A [Vitis vinifera]                                         |
| 1471 | 17798 | gi 224146178 | 64.64 | 5  | 3 | 1 | Carbamidomethylation | 49470  | hypothetical protein POPTR_0019s08290g [Populus trichocarpa]                               |
| 1982 | 17970 | gi 552539635 | 64.56 | 29 | 3 | 2 |                      | 14625  | ATP synthase CF1 epsilon subunit (chloroplast) [Camellia cuspidata]                        |
| 1048 | 1090  | gi 225465997 | 64.43 | 6  | 3 | 2 |                      | 48382  | PREDICTED: WD-40 repeat-containing protein MSI1 [Vitis vinifera]                           |
| 1447 | 18691 | gi 671743260 | 64.42 | 10 | 2 | 2 |                      | 24165  | cytochrome b6 (chloroplast) [Camellia petelotii]                                           |
| 1029 | 1128  | gi 731418015 | 64.38 | 7  | 3 | 2 |                      | 53972  | PREDICTED: tryptophan synthase beta chain 1 [Vitis vinifera]                               |
| 1656 | 18081 | gi 566159456 | 64.36 | 7  | 3 | 1 |                      | 50614  | hypothetical protein POPTR_0002s22580g [Populus trichocarpa]                               |
| 1560 | 18330 | gi 566234718 | 64.16 | 2  | 2 | 1 |                      | 124541 | exportin1 family protein [Populus trichocarpa]                                             |
| 1650 | 1474  | gi 225453042 | 64.15 | 2  | 2 | 2 | Carbamidomethylation | 113229 | PREDICTED: cell division cycle 5-like protein [Vitis vinifera]                             |
| 1715 | 17999 | gi 566176289 | 64.11 | 15 | 3 | 3 | Carbamidomethylation | 23433  | peroxiredoxin Q family protein [Populus trichocarpa]                                       |
| 1441 | 2329  | gi 225435002 | 64.06 | 6  | 1 | 1 | Carbamidomethylation | 27396  | PREDICTED: osmotin-like protein [Vitis vinifera]                                           |
| 2478 | 1547  | gi 225454994 | 63.89 | 9  | 2 | 1 |                      | 28211  | PREDICTED: peptide methionine sulfoxide reductase A1-like [Vitis vinifera]                 |
| 1801 | 2035  | gi 731402548 | 63.86 | 2  | 2 | 2 |                      | 91875  | PREDICTED: N-alpha-acetyltransferase 15 NatA auxiliary subunit isoform X3 [Vitis vinifera] |
| 1558 | 18246 | gi 566215059 | 63.82 | 6  | 2 | 1 |                      | 67827  | hypothetical protein POPTR_0018s09760g [Populus trichocarpa]                               |

|      |       |              |       |    |   |   |                      |        |                                                                                      |
|------|-------|--------------|-------|----|---|---|----------------------|--------|--------------------------------------------------------------------------------------|
| 1958 | 2389  | gi 731369373 | 63.75 | 5  | 2 | 1 | Carbamidomethylation | 51603  | PREDICTED: glucan endo-1 3-beta-glucosidase 3 isoform X2 [Vitis vinifera]            |
| 1721 | 1195  | gi 225444525 | 63.73 | 7  | 2 | 1 | Carbamidomethylation | 41018  | PREDICTED: ATP synthase gamma chain chloroplastic [Vitis vinifera]                   |
| 1986 | 18690 | gi 566167629 | 63.72 | 8  | 2 | 2 | Carbamidomethylation | 40491  | homoserine dehydrogenase family protein [Populus trichocarpa]                        |
| 1136 | 1292  | gi 731378427 | 63.71 | 5  | 2 | 2 |                      | 51975  | PREDICTED: uncharacterized protein LOC100263310 [Vitis vinifera]                     |
| 1454 | 19656 | gi 566169467 | 63.69 | 9  | 1 | 1 |                      | 13987  | hypothetical protein POPTR_0005s04590g [Populus trichocarpa]                         |
| 1696 | 18529 | gi 566151474 | 63.66 | 20 | 2 | 2 | Carbamidomethylation | 12414  | hypothetical protein POPTR_0001s28430g [Populus trichocarpa]                         |
| 1038 | 2304  | gi 225435608 | 63.46 | 8  | 1 | 1 | Carbamidomethylation | 31609  | PREDICTED: zinc finger CCCH domain-containing protein 14-like [Vitis vinifera]       |
| 1179 | 1373  | gi 225465210 | 63.27 | 17 | 2 | 2 |                      | 11974  | PREDICTED: cytochrome c [Vitis vinifera]                                             |
| 2213 | 18710 | gi 224065729 | 63.23 | 15 | 2 | 2 |                      | 24619  | hypothetical protein POPTR_0002s01660g [Populus trichocarpa]                         |
| 1450 | 18856 | gi 224099491 | 63.15 | 24 | 2 | 1 |                      | 10451  | hypothetical protein POPTR_0008s12950g [Populus trichocarpa]                         |
| 2368 | 1736  | gi 731410731 | 63.14 | 2  | 2 | 1 |                      | 178423 | PREDICTED: UDP-glucose:glycoprotein glucosyltransferase isoform X2 [Vitis vinifera]  |
| 892  | 18516 | gi 224104953 | 63.09 | 4  | 2 | 1 |                      | 68350  | beta-D-glucan exohydrolase family protein [Populus trichocarpa]                      |
| 1607 | 1262  | gi 731436828 | 62.96 | 6  | 2 | 1 | Carbamidomethylation | 57638  | PREDICTED: ATP-dependent 6-phosphofructokinase 5 chloroplastic-like [Vitis vinifera] |

|      |       |              |       |    |   |   |                      |       |                                                                                |
|------|-------|--------------|-------|----|---|---|----------------------|-------|--------------------------------------------------------------------------------|
| 1530 | 2484  | gi 225465947 | 62.7  | 7  | 2 | 2 |                      | 52209 | PREDICTED: uridine 5'-monophosphate synthase [Vitis vinifera]                  |
| 1413 | 18306 | gi 566152880 | 62.61 | 4  | 2 | 1 |                      | 86547 | hypothetical protein POPTR_0001s35150g [Populus trichocarpa]                   |
| 598  | 18297 | gi 566192144 | 62.59 | 6  | 2 | 2 |                      | 36328 | hypothetical protein POPTR_0010s22170g [Populus trichocarpa]                   |
| 1927 | 1415  | gi 225437227 | 62.56 | 4  | 2 | 2 |                      | 60053 | PREDICTED: glutathione reductase chloroplastic [Vitis vinifera]                |
| 1771 | 18320 | gi 566166505 | 62.45 | 4  | 2 | 1 |                      | 65003 | hypothetical protein POPTR_0004s14530g [Populus trichocarpa]                   |
| 1951 | 1375  | gi 359487733 | 62.37 | 6  | 2 | 1 |                      | 46705 | PREDICTED: amidase 1 [Vitis vinifera]                                          |
| 1414 | 18312 | gi 224082494 | 62.23 | 4  | 2 | 2 |                      | 38884 | peroxidase precursor family protein [Populus trichocarpa]                      |
| 1612 | 2305  | gi 526117321 | 62.16 | 8  | 1 | 1 |                      | 23675 | dehydroascorbate reductase [Vitis vinifera]                                    |
| 1176 | 1075  | gi 526117894 | 62.12 | 7  | 3 | 1 |                      | 36735 | anthocyanidin reductase [Vitis vinifera]                                       |
| 1446 | 1659  | gi 731419120 | 61.79 | 6  | 2 | 2 |                      | 29507 | PREDICTED: beta carbonic anhydrase 1 chloroplastic isoform X2 [Vitis vinifera] |
| 776  | 2170  | gi 225425388 | 61.73 | 11 | 1 | 1 |                      | 13594 | PREDICTED: nuclear transport factor 2 [Vitis vinifera]                         |
| 1684 | 1728  | gi 225463807 | 61.73 | 5  | 2 | 1 |                      | 45416 | PREDICTED: alpha-galactosidase [Vitis vinifera]                                |
| 1600 | 18004 | gi 224086130 | 61.6  | 10 | 3 | 1 | Carbamidomethylation | 32243 | U2 snRNP auxiliary factor small subunit family protein [Populus trichocarpa]   |
| 1666 | 19042 | gi 566210832 | 61.57 | 7  | 1 | 1 |                      | 25245 | hypothetical protein POPTR_0017s02160g [Populus trichocarpa]                   |
| 1820 | 2451  | gi 225439775 | 61.48 | 8  | 2 | 1 |                      | 27055 | PREDICTED: glutathione S-transferase L3-like [Vitis vinifera]                  |
| 959  | 1642  | gi 225462170 | 61.48 | 12 | 2 | 2 |                      | 15615 | PREDICTED: 60S ribosomal protein L27 [Vitis vinifera]                          |



|      |       |              |       |    |   |   |                      |        |                                                                                                        |
|------|-------|--------------|-------|----|---|---|----------------------|--------|--------------------------------------------------------------------------------------------------------|
| 1688 | 19243 | gi 224134737 | 61.41 | 7  | 1 | 1 |                      | 23290  | cytochrome b5 domain-containing family protein [Populus trichocarpa]                                   |
| 2126 | 18462 | gi 566192083 | 61.39 | 3  | 2 | 1 | Carbamidomethylation | 111427 | transport protein Sec24 [Populus trichocarpa]                                                          |
| 2265 | 1203  | gi 731391355 | 61.21 | 4  | 2 | 2 |                      | 85892  | PREDICTED: LETM1 and EF-hand domain-containing protein 1 mitochondrial [Vitis vinifera]                |
| 1404 | 1609  | gi 225437963 | 61.19 | 6  | 2 | 2 |                      | 43931  | PREDICTED: NADH dehydrogenase [ubiquinone] 1 alpha subcomplex subunit 9 mitochondrial [Vitis vinifera] |
| 1840 | 18775 | gi 566181200 | 61.16 | 4  | 2 | 2 | Carbamidomethylation | 55243  | serine carboxypeptidase S28 family protein [Populus trichocarpa]                                       |
| 2161 | 18550 | gi 225456944 | 61.13 | 6  | 2 | 2 |                      | 57954  | PREDICTED: suppressor of mec-8 and unc-52 protein homolog 1 [Vitis vinifera]                           |
| 1328 | 18099 | gi 224104247 | 61.08 | 4  | 2 | 2 |                      | 44001  | aminotransferase 2 family protein [Populus trichocarpa]                                                |
| 2084 | 18328 | gi 224063293 | 61.04 | 7  | 2 | 2 | Carbamidomethylation | 31523  | FH INTERACTING protein 1 [Populus trichocarpa]                                                         |
| 1448 | 2442  | gi 225429295 | 61    | 8  | 2 | 2 |                      | 25371  | PREDICTED: uncharacterized protein LOC100254416 [Vitis vinifera]                                       |
| 1634 | 18533 | gi 566204671 | 60.98 | 2  | 1 | 1 |                      | 65660  | hypothetical protein POPTR_0014s16810g [Populus trichocarpa]                                           |
| 2159 | 3507  | gi 731400520 | 60.72 | 4  | 2 | 2 |                      | 70745  | PREDICTED: pentatricopeptide repeat-containing protein At1g80270 mitochondrial-like [Vitis vinifera]   |
| 1923 | 2081  | gi 225448215 | 60.57 | 10 | 3 | 1 |                      | 40979  | PREDICTED: serine/threonine-protein kinase SRK2A [Vitis vinifera]                                      |

|      |       |              |       |    |   |   |                      |        |                                                                                                                                               |
|------|-------|--------------|-------|----|---|---|----------------------|--------|-----------------------------------------------------------------------------------------------------------------------------------------------|
| 1186 | 1864  | gi 731404286 | 60.54 | 3  | 2 | 2 |                      | 51076  | PREDICTED: dihydrolipoyllysine-residue succinyltransferase component of 2-oxoglutarate dehydrogenase complex 1 mitochondrial [Vitis vinifera] |
| 2043 | 1161  | gi 526117964 | 60.53 | 3  | 2 | 1 |                      | 84928  | alpha-galactosidase [Vitis vinifera]                                                                                                          |
| 1724 | 18859 | gi 224107333 | 60.52 | 26 | 2 | 2 |                      | 9716   | hypothetical protein POPTR_0010s02580g [Populus trichocarpa]                                                                                  |
| 2124 | 1990  | gi 225441489 | 60.48 | 5  | 2 | 2 |                      | 38483  | PREDICTED: activator of 90 kDa heat shock protein ATPase homolog [Vitis vinifera]                                                             |
| 1924 | 1026  | gi 225443231 | 60.48 | 6  | 3 | 1 |                      | 50032  | PREDICTED: methanol O-anthraniloyltransferase [Vitis vinifera]                                                                                |
| 1375 | 1486  | gi 225465204 | 60.45 | 2  | 3 | 2 | Carbamidomethylation | 122695 | PREDICTED: leucine--tRNA ligase cytoplasmic [Vitis vinifera]                                                                                  |
| 1365 | 1382  | gi 359489656 | 60.44 | 6  | 2 | 2 |                      | 52031  | PREDICTED: probable polygalacturonase [Vitis vinifera]                                                                                        |
| 1785 | 2331  | gi 731432527 | 60.22 | 7  | 1 | 1 |                      | 26117  | PREDICTED: DAG protein chloroplastic [Vitis vinifera]                                                                                         |
| 1823 | 1581  | gi 731408703 | 60.12 | 6  | 2 | 2 | Carbamidomethylation | 54961  | PREDICTED: serine/threonine-protein phosphatase 5 isoform X2 [Vitis vinifera]                                                                 |
| 1882 | 1763  | gi 731440118 | 60.05 | 2  | 2 | 2 | Carbamidomethylation | 144044 | PREDICTED: kinesin-like protein KCA2 [Vitis vinifera]                                                                                         |
| 2056 | 18140 | gi 566168611 | 59.73 | 2  | 2 | 1 | Carbamidomethylation | 120029 | hypothetical protein POPTR_0005s00700g [Populus trichocarpa]                                                                                  |
| 1542 | 1387  | gi 225427288 | 59.7  | 4  | 2 | 1 |                      | 68795  | PREDICTED: dynamin-related protein 1E [Vitis vinifera]                                                                                        |
| 1952 | 1340  | gi 225442595 | 59.66 | 4  | 2 | 2 |                      | 60200  | PREDICTED: protein disulfide isomerase-like 1-6 [Vitis vinifera]                                                                              |
| 1773 | 18879 | gi 566193798 | 59.59 | 3  | 1 | 1 |                      | 49306  | thioredoxin family protein [Populus trichocarpa]                                                                                              |
| 1243 | 2306  | gi 526117918 | 59.58 | 5  | 1 | 1 |                      | 33457  | basic endochitinase precursor [Vitis vinifera]                                                                                                |

|      |       |              |       |    |   |   |                      |        |                                                                                           |
|------|-------|--------------|-------|----|---|---|----------------------|--------|-------------------------------------------------------------------------------------------|
| 824  | 1104  | gi 731435142 | 59.36 | 3  | 2 | 1 |                      | 84036  | PREDICTED: protein ROOT HAIR DEFECTIVE 3 homolog 2 isoform X2 [Vitis vinifera]            |
| 1770 | 18310 | gi 224143674 | 59.35 | 5  | 2 | 2 |                      | 38385  | fructose-1 family protein [Populus trichocarpa]                                           |
| 1367 | 1213  | gi 731426682 | 59.2  | 3  | 3 | 3 | Oxidation (M)        | 143427 | PREDICTED: uncharacterized protein LOC100262718 isoform X3 [Vitis vinifera]               |
| 1401 | 18354 | gi 566203998 | 59.14 | 2  | 2 | 1 |                      | 101817 | AAA-type ATPase family protein [Populus trichocarpa]                                      |
| 2071 | 1738  | gi 526117810 | 59.12 | 5  | 1 | 1 |                      | 38980  | farnesyl diphosphate synthase [Vitis vinifera]                                            |
| 2083 | 1167  | gi 225457034 | 58.99 | 4  | 2 | 2 | Carbamidomethylation | 51176  | PREDICTED: 1-deoxy-D-xylulose 5-phosphate reductoisomerase chloroplastic [Vitis vinifera] |
| 1837 | 1625  | gi 731441218 | 58.99 | 9  | 3 | 3 |                      | 36022  | PREDICTED: 1-aminocyclopropane-1-carboxylate oxidase [Vitis vinifera]                     |
| 1571 | 1158  | gi 225462270 | 58.91 | 12 | 3 | 3 | Carbamidomethylation | 31886  | PREDICTED: 2-dehydro-3-deoxyphosphooctonate aldolase [Vitis vinifera]                     |
| 1825 | 18724 | gi 566179116 | 58.9  | 9  | 2 | 2 |                      | 29952  | integral membrane HRF1 family protein [Populus trichocarpa]                               |
| 1434 | 928   | gi 225445670 | 58.84 | 9  | 3 | 1 |                      | 24997  | PREDICTED: proteasome subunit beta type-6 [Vitis vinifera]                                |
| 1782 | 2000  | gi 731418793 | 58.73 | 4  | 2 | 2 |                      | 59155  | PREDICTED: glucose-6-phosphate 1-dehydrogenase cytoplasmic isoform [Vitis vinifera]       |
| 1903 | 18400 | gi 566150061 | 58.72 | 3  | 2 | 1 |                      | 89791  | hypothetical protein POPTR_0001s20820g [Populus trichocarpa]                              |
| 1842 | 1668  | gi 225448536 | 58.53 | 7  | 2 | 2 |                      | 38803  | PREDICTED: eukaryotic translation initiation factor 2 subunit alpha [Vitis vinifera]      |
| 1576 | 1576  | gi 225427798 | 58.5  | 4  | 2 | 1 |                      | 62899  | PREDICTED: amidophosphoribosyltransferase chloroplastic [Vitis vinifera]                  |
| 547  | 1227  | gi 225443962 | 58.36 | 2  | 2 | 2 |                      | 81691  | PREDICTED: CSC1-like protein ERD4 [Vitis vinifera]                                        |

|      |       |              |       |    |   |   |                      |       |                                                                                         |
|------|-------|--------------|-------|----|---|---|----------------------|-------|-----------------------------------------------------------------------------------------|
| 2152 | 1689  | gi 359491530 | 58.36 | 7  | 3 | 3 |                      | 73129 | PREDICTED: probable inactive receptor kinase At1g48480 [Vitis vinifera]                 |
| 2428 | 18469 | gi 566187699 | 58.36 | 6  | 2 | 2 |                      | 36049 | ubiquitin fusion degradation UFD1 family protein [Populus trichocarpa]                  |
| 2068 | 18268 | gi 566195934 | 58.34 | 4  | 2 | 1 |                      | 83449 | alkaline alpha galactosidase I family protein [Populus trichocarpa]                     |
| 2215 | 18735 | gi 224062667 | 58.33 | 5  | 2 | 1 |                      | 43605 | enoyl-CoA hydratase/isomerase family protein [Populus trichocarpa]                      |
| 2085 | 18334 | gi 566172110 | 58.24 | 8  | 2 | 2 | Carbamidomethylation | 39318 | casein kinase II alpha chain family protein [Populus trichocarpa]                       |
| 1577 | 18391 | gi 224066191 | 58.23 | 8  | 2 | 1 | Carbamidomethylation | 29403 | transcription factor APFI family protein [Populus trichocarpa]                          |
| 1987 | 2668  | gi 731391510 | 58.23 | 11 | 2 | 2 |                      | 25576 | PREDICTED: uncharacterized protein LOC104879510 isoform X2 [Vitis vinifera]             |
| 1846 | 19104 | gi 224078057 | 58.13 | 5  | 1 | 1 |                      | 28150 | phosphorylase family protein [Populus trichocarpa]                                      |
| 1623 | 2312  | gi 225457389 | 58.08 | 5  | 1 | 1 |                      | 27867 | PREDICTED: chlorophyll a-b binding protein 4 chloroplastic [Vitis vinifera]             |
| 1241 | 1562  | gi 224365629 | 58.06 | 6  | 2 | 2 |                      | 43947 | apocytochrome b (mitochondrion) [Vitis vinifera]                                        |
| 1449 | 18810 | gi 566209344 | 57.82 | 7  | 2 | 1 |                      | 27361 | In2-1 family protein [Populus trichocarpa]                                              |
| 1983 | 18074 | gi 566161702 | 57.72 | 8  | 3 | 1 |                      | 30568 | Mitochondrial carnitine/acylcarnitine carrier-like family protein [Populus trichocarpa] |
| 414  | 18536 | gi 566165881 | 57.58 | 8  | 2 | 2 |                      | 27272 | mangrin family protein [Populus trichocarpa]                                            |
| 1603 | 18271 | gi 224105935 | 57.56 | 8  | 2 | 2 | Carbamidomethylation | 24127 | RAN BINDING protein 1 [Populus trichocarpa]                                             |
| 1659 | 18348 | gi 566173129 | 57.51 | 5  | 2 | 2 |                      | 41052 | hypothetical protein POPTR_0005s25100g [Populus trichocarpa]                            |

|      |       |              |       |    |   |   |                      |       |                                                                                                                      |
|------|-------|--------------|-------|----|---|---|----------------------|-------|----------------------------------------------------------------------------------------------------------------------|
| 1559 | 2180  | gi 225428049 | 57.35 | 4  | 2 | 1 |                      | 42284 | PREDICTED: glycerate dehydrogenase HPR peroxisomal [Vitis vinifera]                                                  |
| 1758 | 4071  | gi 225445080 | 57.3  | 3  | 1 | 1 |                      | 53828 | PREDICTED: hexokinase-1-like [Vitis vinifera]                                                                        |
| 1148 | 1152  | gi 225453336 | 57.23 | 2  | 2 | 2 |                      | 90759 | PREDICTED: glutamine--tRNA ligase [Vitis vinifera]                                                                   |
| 1412 | 18241 | gi 566146307 | 57.18 | 4  | 2 | 1 |                      | 66102 | monocopper oxidase precursor family protein [Populus trichocarpa]                                                    |
| 2432 | 1565  | gi 731437645 | 57.07 | 8  | 2 | 2 | Carbamidomethylation | 32643 | PREDICTED: LOW QUALITY PROTEIN: ruvB-like 2 [Vitis vinifera]                                                         |
| 1928 | 1696  | gi 225428556 | 56.96 | 4  | 2 | 2 |                      | 48755 | PREDICTED: dolichyl-diphosphooligosaccharide--protein glycosyltransferase 48 kDa subunit isoform X2 [Vitis vinifera] |
| 1964 | 18794 | gi 224066629 | 56.9  | 16 | 2 | 2 |                      | 16281 | thioredoxin family protein [Populus trichocarpa]                                                                     |
| 1672 | 18089 | gi 566160305 | 56.89 | 7  | 3 | 3 |                      | 45443 | hypothetical protein POPTR_0003s01630g [Populus trichocarpa]                                                         |
| 1992 | 18833 | gi 224145402 | 56.79 | 26 | 2 | 2 |                      | 8337  | ubiquinol-cytochrome C reductase complex ubiquinone-binding family protein [Populus trichocarpa]                     |
| 2479 | 1596  | gi 731405420 | 56.75 | 4  | 2 | 1 |                      | 60227 | PREDICTED: reticuline oxidase-like protein [Vitis vinifera]                                                          |
| 1584 | 1779  | gi 225448795 | 56.71 | 11 | 3 | 3 | Carbamidomethylation | 19172 | PREDICTED: cytochrome c oxidase subunit 6b-1 isoform X4 [Vitis vinifera]                                             |
| 1566 | 18219 | gi 566163043 | 56.66 | 3  | 2 | 2 |                      | 67870 | glucose-6-phosphate dehydrogenase family protein [Populus trichocarpa]                                               |
| 1936 | 19160 | gi 225435731 | 56.48 | 7  | 1 | 1 |                      | 28535 | PREDICTED: serine/arginine-rich SC35-like splicing factor SCL30A [Vitis vinifera]                                    |
| 1856 | 1495  | gi 731437632 | 56.44 | 6  | 2 | 1 | Carbamidomethylation | 44812 | PREDICTED: branched-chain-amino-acid aminotransferase 5 chloroplastic [Vitis vinifera]                               |

|      |       |              |       |    |   |   |                      |        |                                                                                     |
|------|-------|--------------|-------|----|---|---|----------------------|--------|-------------------------------------------------------------------------------------|
| 2186 | 19551 | gi 224073260 | 56.4  | 14 | 1 | 1 |                      | 10707  | small nuclear ribonucleoprotein D [Populus trichocarpa]                             |
| 1334 | 1908  | gi 225424859 | 56.2  | 8  | 2 | 2 |                      | 25630  | PREDICTED: glutathione S-transferase U17 [Vitis vinifera]                           |
| 2110 | 2310  | gi 225427364 | 56.14 | 3  | 1 | 1 | Carbamidomethylation | 51132  | PREDICTED: poly(U)-specific endoribonuclease-B [Vitis vinifera]                     |
| 1955 | 18515 | gi 566245088 | 56.01 | 8  | 2 | 1 |                      | 33717  | Xyloglucan endotransglucosylase/hydrolase protein 9 precursor [Populus trichocarpa] |
| 2002 | 19680 | gi 566152777 | 55.92 | 15 | 1 | 1 | Carbamidomethylation | 12696  | hypothetical protein POPTR_0001s34690g [Populus trichocarpa]                        |
| 2216 | 18746 | gi 566153195 | 55.9  | 8  | 2 | 2 |                      | 42888  | cell division family protein [Populus trichocarpa]                                  |
| 1929 | 18351 | gi 566216001 | 55.88 | 5  | 2 | 2 | Carbamidomethylation | 74542  | hypothetical protein POPTR_0019s00300g [Populus trichocarpa]                        |
| 574  | 18787 | gi 224146534 | 55.77 | 6  | 2 | 1 | Oxidation (M)        | 29228  | hypothetical protein POPTR_0019s12390g [Populus trichocarpa]                        |
| 1345 | 2315  | gi 731376404 | 55.76 | 7  | 1 | 1 | Carbamidomethylation | 28963  | PREDICTED: chlorophyll a-b binding protein chloroplastic [Vitis vinifera]           |
| 1798 | 17963 | gi 224125250 | 55.72 | 3  | 3 | 3 |                      | 110348 | glycoside hydrolase family 2 family protein [Populus trichocarpa]                   |
| 1487 | 1096  | gi 225445041 | 55.68 | 4  | 2 | 1 |                      | 54472  | PREDICTED: mitochondrial-processing peptidase subunit alpha [Vitis vinifera]        |
| 1657 | 18299 | gi 731436460 | 55.68 | 2  | 3 | 1 | Carbamidomethylation | 123310 | PREDICTED: leucine--tRNA ligase cytoplasmic-like [Vitis vinifera]                   |
| 1761 | 1651  | gi 225438962 | 55.66 | 5  | 1 | 1 |                      | 35957  | PREDICTED: peroxidase 73 [Vitis vinifera]                                           |
| 2088 | 1901  | gi 225430912 | 55.64 | 6  | 1 | 1 |                      | 35298  | PREDICTED: membrane-associated protein VIPP1 chloroplastic [Vitis vinifera]         |

|      |       |              |       |    |   |   |                      |       |                                                                                                     |
|------|-------|--------------|-------|----|---|---|----------------------|-------|-----------------------------------------------------------------------------------------------------|
| 2112 | 2040  | gi 731428304 | 55.54 | 2  | 1 | 1 |                      | 81014 | PREDICTED: apoptotic chromatin condensation inducer in the nucleus-like isoform X2 [Vitis vinifera] |
| 954  | 19311 | gi 566172679 | 55.53 | 2  | 1 | 1 |                      | 63027 | hypothetical protein POPTR_0005s22250g [Populus trichocarpa]                                        |
| 2274 | 18911 | gi 566184573 | 55.52 | 2  | 1 | 1 |                      | 90021 | urease family protein [Populus trichocarpa]                                                         |
| 1526 | 1621  | gi 225431409 | 55.49 | 4  | 2 | 1 |                      | 39072 | PREDICTED: probable mannitol dehydrogenase [Vitis vinifera]                                         |
| 1533 | 2595  | gi 359473679 | 55.48 | 4  | 1 | 1 | Carbamidomethylation | 35252 | PREDICTED: uncharacterized protein LOC100852583 [Vitis vinifera]                                    |
| 1598 | 1688  | gi 359479353 | 55.37 | 18 | 3 | 1 |                      | 21048 | PREDICTED: lactoylglutathione lyase isoform X2 [Vitis vinifera]                                     |
| 1883 | 18756 | gi 566146785 | 55.36 | 3  | 1 | 1 |                      | 43851 | UBIQUITIN-SPECIFIC PROTEASE 20 family protein [Populus trichocarpa]                                 |
| 2166 | 18758 | gi 566207939 | 55.34 | 6  | 2 | 1 | Carbamidomethylation | 33480 | hypothetical protein POPTR_0016s00580g [Populus trichocarpa]                                        |
| 2160 | 18544 | gi 225456299 | 55.25 | 9  | 2 | 2 |                      | 20927 | PREDICTED: 60S ribosomal protein L17-2-like isoform X2 [Vitis vinifera]                             |
| 1697 | 18539 | gi 224092348 | 55.2  | 17 | 2 | 2 | Carbamidomethylation | 10699 | hypothetical protein POPTR_0006s25990g [Populus trichocarpa]                                        |
| 2255 | 18535 | gi 224064627 | 55.16 | 4  | 2 | 1 |                      | 82942 | pre-mRNA splicing factor ATP-dependent RNA helicase family protein [Populus trichocarpa]            |
| 2156 | 18214 | gi 566175269 | 55.09 | 4  | 2 | 2 |                      | 42962 | hypothetical protein POPTR_0006s08830g [Populus trichocarpa]                                        |
| 1881 | 3282  | gi 359486347 | 55.06 | 7  | 3 | 3 | Carbamidomethylation | 43181 | PREDICTED: uroporphyrinogen decarboxylase [Vitis vinifera]                                          |
| 1604 | 18313 | gi 224053607 | 54.96 | 6  | 2 | 1 |                      | 34050 | EXGT1 family protein [Populus trichocarpa]                                                          |

|      |       |              |       |    |   |   |                      |        |                                                                                    |
|------|-------|--------------|-------|----|---|---|----------------------|--------|------------------------------------------------------------------------------------|
| 1990 | 18806 | gi 224116660 | 54.84 | 4  | 2 | 1 | Carbamidomethylation | 69893  | hypothetical protein POPTR_0011s09560g [Populus trichocarpa]                       |
| 1663 | 1666  | gi 526117699 | 54.8  | 4  | 2 | 2 |                      | 49406  | 3-dehydroquinase synthase-like [Vitis vinifera]                                    |
| 1510 | 18430 | gi 224064818 | 54.77 | 4  | 2 | 1 |                      | 47984  | hypothetical protein POPTR_0002s22410g [Populus trichocarpa]                       |
| 1941 | 2116  | gi 731436778 | 54.75 | 8  | 1 | 1 |                      | 21619  | PREDICTED: probable NAD(P)H dehydrogenase (quinone) FQR1-like 1 [Vitis vinifera]   |
| 1692 | 3335  | gi 731400729 | 54.69 | 7  | 3 | 1 | Carbamidomethylation | 40133  | PREDICTED: splicing factor U2af small subunit B-like [Vitis vinifera]              |
| 1685 | 18453 | gi 224122636 | 54.66 | 4  | 2 | 2 |                      | 46434  | putative calmodulin-binding family protein [Populus trichocarpa]                   |
| 1355 | 1617  | gi 225429460 | 54.64 | 15 | 2 | 2 |                      | 14040  | PREDICTED: uncharacterized protein LOC100267911 [Vitis vinifera]                   |
| 1931 | 2586  | gi 225431100 | 54.45 | 4  | 2 | 2 |                      | 42836  | PREDICTED: 26S proteasome non-ATPase regulatory subunit 4 homolog [Vitis vinifera] |
| 2219 | 2388  | gi 731424368 | 54.3  | 2  | 1 | 1 |                      | 72886  | PREDICTED: pentatricopeptide repeat-containing protein At3g49240 [Vitis vinifera]  |
| 2792 | 19031 | gi 224077834 | 54.21 | 3  | 1 | 1 | Carbamidomethylation | 56616  | phenylalanyl-tRNA synthetase alpha chain family protein [Populus trichocarpa]      |
| 1698 | 1424  | gi 225432062 | 54.2  | 5  | 2 | 2 |                      | 44703  | PREDICTED: 30S ribosomal protein S1 chloroplast [Vitis vinifera]                   |
| 2122 | 18269 | gi 566168843 | 54.18 | 3  | 2 | 2 |                      | 104889 | Lon protease 2 family protein [Populus trichocarpa]                                |
| 1849 | 2320  | gi 731416920 | 54.09 | 15 | 1 | 1 | Carbamidomethylation | 15217  | PREDICTED: superoxide dismutase [Cu-Zn] 2-like [Vitis vinifera]                    |
| 2189 | 2330  | gi 225438277 | 54.09 | 3  | 1 | 1 | Carbamidomethylation | 45078  | PREDICTED: alcohol dehydrogenase 1 [Vitis vinifera]                                |



|      |       |              |       |    |   |   |                      |       |                                                                                           |
|------|-------|--------------|-------|----|---|---|----------------------|-------|-------------------------------------------------------------------------------------------|
| 2871 | 19315 | gi 224067318 | 54.07 | 7  | 1 | 1 |                      | 22986 | 30S ribosomal protein S9 [Populus trichocarpa]                                            |
| 1699 | 18555 | gi 566167707 | 54.06 | 8  | 2 | 2 |                      | 29259 | alcohol dehydroge family protein [Populus trichocarpa]                                    |
| 1506 | 18122 | gi 224085976 | 54.05 | 3  | 3 | 2 |                      | 82530 | prolyl oligopeptidase family protein [Populus trichocarpa]                                |
| 1293 | 18423 | gi 224056200 | 54.01 | 4  | 2 | 1 |                      | 48114 | 5-methylthioribose kinase family protein [Populus trichocarpa]                            |
| 1827 | 2871  | gi 225455386 | 54.01 | 3  | 2 | 1 |                      | 65593 | PREDICTED: probable pectinesterase/pectinesterase inhibitor 34 [Vitis vinifera]           |
| 1949 | 18176 | gi 566175819 | 53.94 | 4  | 3 | 2 |                      | 67279 | hypothetical protein POPTR_0006s11980g [Populus trichocarpa]                              |
| 1527 | 1615  | gi 359497056 | 53.86 | 5  | 2 | 1 |                      | 35941 | PREDICTED: peroxidase 10-like [Vitis vinifera]                                            |
| 1705 | 18847 | gi 224141239 | 53.79 | 16 | 2 | 1 |                      | 15020 | hypothetical protein POPTR_0017s08140g [Populus trichocarpa]                              |
| 1905 | 18595 | gi 566190935 | 53.74 | 2  | 1 | 1 |                      | 61141 | hypothetical protein POPTR_0010s15200g [Populus trichocarpa]                              |
| 1768 | 18086 | gi 224071469 | 53.58 | 8  | 3 | 3 |                      | 50726 | eukaryotic translation initiation factor 2 subunit 3 family protein [Populus trichocarpa] |
| 1831 | 19686 | gi 224141787 | 53.51 | 6  | 1 | 1 |                      | 27379 | 20S proteasome beta subunit G1 family protein [Populus trichocarpa]                       |
| 1843 | 1435  | gi 225464870 | 53.48 | 9  | 2 | 2 | Carbamidomethylation | 37627 | PREDICTED: bifunctional nitrilase/nitrile hydratase NIT4B [Vitis vinifera]                |
| 714  | 1200  | gi 225452053 | 53.45 | 9  | 2 | 2 |                      | 21963 | PREDICTED: 40S ribosomal protein S7 [Vitis vinifera]                                      |
| 1762 | 1798  | gi 225442268 | 53.44 | 2  | 1 | 1 |                      | 73167 | PREDICTED: transmembrane 9 superfamily member 7 [Vitis vinifera]                          |
| 1541 | 1095  | gi 731423779 | 53.41 | 3  | 3 | 1 |                      | 63328 | PREDICTED: plastidial pyruvate kinase 2 [Vitis vinifera]                                  |
| 1499 | 19350 | gi 224073782 | 53.3  | 9  | 1 | 1 | Carbamidomethylation | 21868 | proline-rich family protein [Populus trichocarpa]                                         |

|      |       |              |       |    |   |   |                                     |        |                                                                          |
|------|-------|--------------|-------|----|---|---|-------------------------------------|--------|--------------------------------------------------------------------------|
| 1415 | 1991  | gi 225431173 | 53.28 | 13 | 1 | 1 |                                     | 12904  | PREDICTED: peptidyl-prolyl cis-trans isomerase Pin1 [Vitis vinifera]     |
| 1643 | 18537 | gi 566159086 | 53.27 | 3  | 2 | 1 |                                     | 61936  | hypothetical protein POPTR_0002s20370g [Populus trichocarpa]             |
| 1143 | 18948 | gi 566197644 | 53.11 | 12 | 2 | 1 |                                     | 26318  | hypothetical protein POPTR_0012s09540g [Populus trichocarpa]             |
| 2453 | 19707 | gi 225435790 | 53.02 | 5  | 1 | 1 |                                     | 36898  | PREDICTED: uncharacterized protein LOC100241562 [Vitis vinifera]         |
| 1621 | 18776 | gi 566201937 | 53.01 | 19 | 2 | 2 | Carbamidomethylation                | 9653   | hypothetical protein POPTR_0014s02030g [Populus trichocarpa]             |
| 1491 | 18525 | gi 566206477 | 52.89 | 11 | 2 | 1 |                                     | 24609  | hypothetical protein POPTR_0015s07620g partial [Populus trichocarpa]     |
| 1988 | 18784 | gi 566181342 | 52.85 | 4  | 2 | 1 |                                     | 49846  | hypothetical protein POPTR_0007s14620g [Populus trichocarpa]             |
| 1783 | 1377  | gi 225452877 | 52.82 | 4  | 2 | 2 |                                     | 57074  | PREDICTED: cystathionine gamma-synthase chloroplastic [Vitis vinifera]   |
| 1271 | 1683  | gi 225467712 | 52.79 | 4  | 2 | 2 |                                     | 62107  | PREDICTED: UPF0051 protein ABC18 chloroplastic [Vitis vinifera]          |
| 1452 | 1795  | gi 225465530 | 52.78 | 5  | 2 | 2 | Carbamidomethylation                | 37226  | PREDICTED: cinnamoyl-CoA reductase 1 [Vitis vinifera]                    |
| 2485 | 19210 | gi 566157463 | 52.69 | 1  | 1 | 1 |                                     | 101527 | hypothetical protein POPTR_0002s11380g [Populus trichocarpa]             |
| 1938 | 19253 | gi 225457361 | 52.66 | 6  | 1 | 1 |                                     | 29994  | PREDICTED: ribulose-phosphate 3-epimerase chloroplastic [Vitis vinifera] |
| 1624 | 2344  | gi 225443154 | 52.65 | 9  | 1 | 1 | Carbamidomethylation; Oxidation (M) | 18245  | PREDICTED: lamin-like protein [Vitis vinifera]                           |
| 2223 | 19709 | gi 566149450 | 52.61 | 13 | 1 | 1 | Carbamidomethylation                | 12595  | ring box family protein [Populus trichocarpa]                            |

|      |       |              |       |    |   |   |                      |        |                                                                                                     |
|------|-------|--------------|-------|----|---|---|----------------------|--------|-----------------------------------------------------------------------------------------------------|
| 935  | 18766 | gi 566202435 | 52.57 | 13 | 2 | 1 |                      | 22118  | uridylate kinase family protein [Populus trichocarpa]                                               |
| 2222 | 19298 | gi 224122632 | 52.56 | 3  | 1 | 1 |                      | 66196  | Monocopper oxidase-like protein SKS1 precursor [Populus trichocarpa]                                |
| 1613 | 2336  | gi 225441619 | 52.53 | 7  | 1 | 1 |                      | 19639  | PREDICTED: putative H/ACA ribonucleoprotein complex subunit 1-like protein 1 [Vitis vinifera]       |
| 2162 | 18556 | gi 224067088 | 52.42 | 3  | 2 | 2 | Carbamidomethylation | 73926  | hypothetical protein POPTR_0002s10850g [Populus trichocarpa]                                        |
| 1342 | 1215  | gi 225462161 | 52.38 | 5  | 2 | 2 |                      | 53484  | PREDICTED: NADH dehydrogenase [ubiquinone] flavoprotein 1 mitochondrial isoform X2 [Vitis vinifera] |
| 2483 | 19033 | gi 526117729 | 52.38 | 2  | 1 | 1 |                      | 61635  | 9 10[9' 10']carotenoid cleavage dioxygenase [Vitis vinifera]                                        |
| 1092 | 1422  | gi 731439999 | 52.38 | 2  | 2 | 1 | Carbamidomethylation | 80675  | PREDICTED: primary amine oxidase-like [Vitis vinifera]                                              |
| 2102 | 3619  | gi 731435290 | 52.23 | 2  | 1 | 1 | Carbamidomethylation | 55485  | PREDICTED: phosphoribosylamine--glycine ligase [Vitis vinifera]                                     |
| 1848 | 2475  | gi 91984022  | 52.18 | 6  | 1 | 1 |                      | 17459  | cytochrome b6/f complex subunit IV (chloroplast) [Vitis vinifera]                                   |
| 1994 | 18850 | gi 224141859 | 52.17 | 15 | 2 | 1 |                      | 14175  | putative ubiquinol-cytochrome c reductase family protein [Populus trichocarpa]                      |
| 2960 | 19421 | gi 566155879 | 52.08 | 3  | 1 | 1 |                      | 53408  | hypothetical protein POPTR_0002s02580g [Populus trichocarpa]                                        |
| 1718 | 18195 | gi 731385121 | 52.03 | 1  | 3 | 2 |                      | 173607 | PREDICTED: myosin-15 [Vitis vinifera]                                                               |
| 1957 | 2854  | gi 731408416 | 51.98 | 4  | 2 | 1 |                      | 53964  | PREDICTED: serine carboxypeptidase-like 13 [Vitis vinifera]                                         |
| 1841 | 1592  | gi 225459957 | 51.92 | 12 | 2 | 2 |                      | 21003  | PREDICTED: uncharacterized protein LOC100261996 [Vitis vinifera]                                    |

|      |       |              |       |    |   |   |                      |        |                                                                                   |
|------|-------|--------------|-------|----|---|---|----------------------|--------|-----------------------------------------------------------------------------------|
| 137  | 19143 | gi 566199750 | 51.89 | 3  | 1 | 1 | Carbamidomethylation | 38299  | hypothetical protein POPTR_0013s06300g [Populus trichocarpa]                      |
| 1950 | 1658  | gi 225435836 | 51.78 | 6  | 2 | 2 |                      | 31222  | PREDICTED: transcription factor Pur-alpha 1 [Vitis vinifera]                      |
| 1676 | 18451 | gi 224089557 | 51.78 | 6  | 2 | 1 | Carbamidomethylation | 42428  | truncated acetyl Co-A acetyltransferase-like family protein [Populus trichocarpa] |
| 1561 | 1762  | gi 731419532 | 51.76 | 5  | 2 | 1 |                      | 58564  | PREDICTED: ATP-dependent 6-phosphofructokinase 5 chloroplast [Vitis vinifera]     |
| 2107 | 19002 | gi 224103819 | 51.74 | 4  | 1 | 1 |                      | 34955  | L-galactose dehydrogenase family protein [Populus trichocarpa]                    |
| 1934 | 18854 | gi 224077654 | 51.71 | 1  | 1 | 1 |                      | 172709 | DNA (cytosine-5)-methyltransferase AthI family protein [Populus trichocarpa]      |
| 1991 | 2674  | gi 225430941 | 51.69 | 14 | 2 | 1 | Carbamidomethylation | 17767  | PREDICTED: putative 4-hydroxy-4-methyl-2-oxoglutarate aldolase 2 [Vitis vinifera] |
| 2506 | 19993 | gi 566196533 | 51.58 | 8  | 2 | 2 | Carbamidomethylation | 14778  | cytochrome b5 isoform Cb5-C family protein [Populus trichocarpa]                  |
| 1873 | 18432 | gi 224116788 | 51.57 | 2  | 1 | 1 |                      | 96196  | hypothetical protein POPTR_0011s06910g [Populus trichocarpa]                      |
| 2268 | 1780  | gi 731433292 | 51.28 | 0  | 1 | 1 |                      | 414522 | PREDICTED: E3 ubiquitin-protein ligase UPL1 isoform X2 [Vitis vinifera]           |
| 2430 | 18575 | gi 566153712 | 51.21 | 5  | 2 | 2 |                      | 52249  | transport protein sec61 [Populus trichocarpa]                                     |
| 1726 | 19048 | gi 566151438 | 51.13 | 3  | 1 | 1 |                      | 43604  | C2 domain-containing family protein [Populus trichocarpa]                         |
| 1806 | 5205  | gi 359482448 | 51.06 | 2  | 1 | 1 |                      | 83440  | PREDICTED: subtilisin-like protease [Vitis vinifera]                              |
| 1117 | 18261 | gi 224109256 | 51.06 | 6  | 2 | 2 |                      | 29460  | ferritin 2 precursor family protein [Populus trichocarpa]                         |
| 999  | 2049  | gi 731411015 | 51.03 | 3  | 1 | 1 |                      | 46869  | PREDICTED: 3-isopropylmalate dehydrogenase chloroplast [Vitis vinifera]           |

|      |       |              |       |    |   |   |                      |        |                                                                                       |
|------|-------|--------------|-------|----|---|---|----------------------|--------|---------------------------------------------------------------------------------------|
| 2431 | 18607 | gi 566152849 | 51.02 | 6  | 2 | 2 |                      | 45355  | hypothetical protein POPTR_0001s34960g [Populus trichocarpa]                          |
| 2155 | 18200 | gi 225447584 | 51.01 | 1  | 2 | 1 |                      | 148746 | PREDICTED: nuclear pore complex protein NUP133 [Vitis vinifera]                       |
| 1514 | 1106  | gi 225435632 | 50.97 | 3  | 2 | 2 |                      | 67979  | PREDICTED: formate--tetrahydrofolate ligase [Vitis vinifera]                          |
| 2164 | 1820  | gi 359478076 | 50.77 | 3  | 1 | 1 | Carbamidomethylation | 68073  | PREDICTED: 2-isopropylmalate synthase A-like [Vitis vinifera]                         |
| 2434 | 18933 | gi 224084864 | 50.72 | 3  | 2 | 1 |                      | 62868  | hypothetical protein POPTR_0005s15790g [Populus trichocarpa]                          |
| 1989 | 18802 | gi 224126895 | 50.66 | 9  | 2 | 1 |                      | 33437  | Xyloglucan endotransglucosylase/hydrolase protein 9 precursor [Populus trichocarpa]   |
| 1677 | 18489 | gi 224080381 | 50.65 | 4  | 2 | 2 |                      | 53896  | diaminopimelate decarboxylase family protein [Populus trichocarpa]                    |
| 1583 | 18046 | gi 566168917 | 50.64 | 3  | 3 | 1 |                      | 113232 | hypothetical protein POPTR_0005s02130g [Populus trichocarpa]                          |
| 2003 | 19728 | gi 224070184 | 50.34 | 11 | 1 | 1 |                      | 18056  | deoxyuridine 5'-triphosphate nucleotidohydrolase family protein [Populus trichocarpa] |
| 2437 | 19080 | gi 225425274 | 50.27 | 4  | 1 | 1 |                      | 29736  | PREDICTED: cytochrome b-c1 complex subunit Rieske-4 mitochondrial [Vitis vinifera]    |
| 1216 | 1098  | gi 359475506 | 50.27 | 6  | 3 | 3 |                      | 44050  | PREDICTED: proline iminopeptidase isoform X1 [Vitis vinifera]                         |
| 1859 | 1261  | gi 225452863 | 50.23 | 3  | 2 | 1 | Carbamidomethylation | 58071  | PREDICTED: KH domain-containing protein At4g18375 [Vitis vinifera]                    |
| 1995 | 18957 | gi 225430198 | 50.22 | 14 | 2 | 1 |                      | 14707  | PREDICTED: cytochrome b-c1 complex subunit 7-2 [Vitis vinifera]                       |

|      |       |              |       |    |   |   |                      |       |                                                                                       |
|------|-------|--------------|-------|----|---|---|----------------------|-------|---------------------------------------------------------------------------------------|
| 1493 | 18942 | gi 566197584 | 49.98 | 3  | 1 | 1 |                      | 42529 | hypothetical protein POPTR_0012s09200g [Populus trichocarpa]                          |
| 2711 | 19046 | gi 566160505 | 49.94 | 2  | 1 | 1 |                      | 75650 | hypothetical protein POPTR_0003s02610g [Populus trichocarpa]                          |
| 1727 | 2348  | gi 225463408 | 49.89 | 10 | 1 | 1 |                      | 14802 | PREDICTED: DNA-binding protein DDB_G0278111 [Vitis vinifera]                          |
| 1902 | 1971  | gi 359492139 | 49.88 | 2  | 2 | 1 |                      | 94211 | PREDICTED: probable methyltransferase PMT24 [Vitis vinifera]                          |
| 2138 | 19431 | gi 566151403 | 49.82 | 20 | 1 | 1 |                      | 8809  | hypothetical protein POPTR_0001s28090g [Populus trichocarpa]                          |
| 2074 | 19090 | gi 566204168 | 49.74 | 3  | 1 | 1 |                      | 56223 | Citrate synthase family protein [Populus trichocarpa]                                 |
| 1965 | 18812 | gi 671741947 | 49.72 | 23 | 2 | 2 |                      | 9397  | photosystem II cytochrome b559 alpha subunit (chloroplast) [Camellia grandibracteata] |
| 2177 | 1889  | gi 359477208 | 49.67 | 2  | 1 | 1 | Carbamidomethylation | 84391 | PREDICTED: flowering time control protein FCA isoform X2 [Vitis vinifera]             |
| 2004 | 2173  | gi 731434735 | 49.64 | 14 | 1 | 1 | Carbamidomethylation | 10306 | PREDICTED: LOW QUALITY PROTEIN: costars family protein [Vitis vinifera]               |
| 2090 | 1892  | gi 359478198 | 49.61 | 3  | 1 | 1 |                      | 45369 | PREDICTED: acyl-[acyl-carrier-protein] desaturase chloroplastic [Vitis vinifera]      |
| 1723 | 18835 | gi 224089058 | 49.59 | 5  | 2 | 1 |                      | 49180 | aspartate transaminase family protein [Populus trichocarpa]                           |
| 2169 | 18926 | gi 225452167 | 49.56 | 4  | 2 | 2 |                      | 56983 | PREDICTED: histone-lysine N-methyltransferase setd3 isoform X2 [Vitis vinifera]       |
| 2224 | 1847  | gi 731389447 | 49.53 | 2  | 1 | 1 |                      | 84064 | PREDICTED: acylamino-acid-releasing enzyme isoform X2 [Vitis vinifera]                |

|      |       |              |       |    |   |   |                      |       |                                                                                                                |
|------|-------|--------------|-------|----|---|---|----------------------|-------|----------------------------------------------------------------------------------------------------------------|
| 1999 | 3539  | gi 731378986 | 49.52 | 13 | 1 | 1 |                      | 13972 | PREDICTED: LOW QUALITY PROTEIN: mitochondrial import inner membrane translocase subunit Tim13 [Vitis vinifera] |
| 1826 | 1989  | gi 731417792 | 49.47 | 2  | 1 | 1 |                      | 72111 | PREDICTED: KH domain-containing protein At4g18375 [Vitis vinifera]                                             |
| 1653 | 2026  | gi 359492937 | 49.4  | 2  | 1 | 1 |                      | 46528 | PREDICTED: aspartic proteinase nepenthesin-1 [Vitis vinifera]                                                  |
| 1625 | 19721 | gi 566206526 | 49.38 | 6  | 1 | 1 |                      | 23501 | hypothetical protein POPTR_0015s07940g [Populus trichocarpa]                                                   |
| 1822 | 1981  | gi 731400731 | 49.31 | 7  | 2 | 2 |                      | 35100 | PREDICTED: histone deacetylase HDT1 [Vitis vinifera]                                                           |
| 1589 | 18589 | gi 566146861 | 49.23 | 5  | 3 | 1 |                      | 61877 | Pyruvate kinase isozyme G family protein [Populus trichocarpa]                                                 |
| 1426 | 18636 | gi 224126029 | 49.2  | 3  | 1 | 1 |                      | 37880 | co-chaperone grpE family protein [Populus trichocarpa]                                                         |
| 2103 | 18565 | gi 731375306 | 49.19 | 4  | 2 | 2 |                      | 65748 | PREDICTED: delta(24)-sterol reductase [Vitis vinifera]                                                         |
| 1704 | 1935  | gi 731400451 | 49.18 | 2  | 1 | 1 |                      | 47908 | PREDICTED: cystathionine beta-lyase chloroplastic isoform X2 [Vitis vinifera]                                  |
| 1866 | 19066 | gi 566189139 | 49.12 | 10 | 1 | 1 |                      | 18857 | hypothetical protein POPTR_0010s05030g [Populus trichocarpa]                                                   |
| 1336 | 19126 | gi 566206069 | 49.12 | 1  | 2 | 1 |                      | 96052 | hypothetical protein POPTR_0015s05790g [Populus trichocarpa]                                                   |
| 2225 | 19727 | gi 224125772 | 49.11 | 7  | 1 | 1 |                      | 23609 | hypothetical protein POPTR_0013s04840g [Populus trichocarpa]                                                   |
| 2316 | 1725  | gi 225430834 | 49.02 | 2  | 1 | 1 |                      | 71703 | PREDICTED: probable Xaa-Pro aminopeptidase P [Vitis vinifera]                                                  |
| 2001 | 19276 | gi 566198430 | 49.02 | 3  | 1 | 1 | Carbamidomethylation | 54941 | hypothetical protein POPTR_0012s14150g [Populus trichocarpa]                                                   |
| 1847 | 1931  | gi 225453329 | 48.78 | 11 | 1 | 1 |                      | 12870 | PREDICTED: tubulin-folding cofactor A [Vitis vinifera]                                                         |

|      |       |              |       |    |   |   |                      |        |                                                                       |
|------|-------|--------------|-------|----|---|---|----------------------|--------|-----------------------------------------------------------------------|
| 3063 | 1669  | gi 225456459 | 48.68 | 5  | 1 | 1 |                      | 42395  | PREDICTED: V-type proton ATPase subunit C isoform X1 [Vitis vinifera] |
| 2427 | 18425 | gi 566186422 | 48.67 | 3  | 2 | 2 |                      | 83467  | hypothetical protein POPTR_0009s05400g [Populus trichocarpa]          |
| 2713 | 19211 | gi 566211720 | 48.62 | 2  | 1 | 1 |                      | 131864 | hypothetical protein POPTR_0017s06170g [Populus trichocarpa]          |
| 1845 | 18906 | gi 566208409 | 48.6  | 3  | 2 | 1 |                      | 57917  | hypothetical protein POPTR_0016s03090g [Populus trichocarpa]          |
| 1710 | 19456 | gi 566208324 | 48.56 | 2  | 1 | 1 | Carbamidomethylation | 59394  | hypothetical protein POPTR_0016s02620g [Populus trichocarpa]          |
| 2312 | 19120 | gi 566149278 | 48.55 | 3  | 1 | 1 | Carbamidomethylation | 42201  | hypothetical protein POPTR_0001s15980g [Populus trichocarpa]          |
| 2005 | 19737 | gi 224070843 | 48.44 | 8  | 1 | 1 |                      | 19159  | glutaredoxin family protein [Populus trichocarpa]                     |
| 1865 | 1860  | gi 359474339 | 48.43 | 3  | 1 | 1 |                      | 45436  | PREDICTED: probable transaldolase isoform X1 [Vitis vinifera]         |
| 1790 | 19420 | gi 566153420 | 48.3  | 7  | 1 | 1 |                      | 26572  | hypothetical protein POPTR_0001s38130g [Populus trichocarpa]          |
| 1518 | 19744 | gi 224137260 | 48.13 | 12 | 1 | 1 |                      | 11459  | hypothetical protein POPTR_0016s01100g [Populus trichocarpa]          |
| 1898 | 18093 | gi 566214132 | 48.08 | 3  | 3 | 3 |                      | 108955 | hypothetical protein POPTR_0018s03980g [Populus trichocarpa]          |
| 1829 | 1868  | gi 731403923 | 48.04 | 2  | 2 | 1 |                      | 86106  | PREDICTED: cycloartenol Synthase isoform X2 [Vitis vinifera]          |
| 2348 | 1891  | gi 731386596 | 47.97 | 1  | 1 | 1 | Carbamidomethylation | 287778 | PREDICTED: translational activator GCN1 [Vitis vinifera]              |
| 2091 | 19131 | gi 224073524 | 47.92 | 8  | 1 | 1 |                      | 16505  | hypothetical protein POPTR_0003s03980g [Populus trichocarpa]          |



|      |       |              |       |    |   |   |                      |        |                                                                                           |
|------|-------|--------------|-------|----|---|---|----------------------|--------|-------------------------------------------------------------------------------------------|
| 800  | 2055  | gi 731433025 | 47.89 | 9  | 1 | 1 |                      | 12656  | PREDICTED: mitochondrial pyruvate carrier 2-like isoform X1 [Vitis vinifera]              |
| 2081 | 18245 | gi 224123934 | 47.87 | 9  | 2 | 2 | Oxidation (M)        | 31085  | hypothetical protein POPTR_0013s06360g [Populus trichocarpa]                              |
| 1802 | 1067  | gi 225449362 | 47.78 | 6  | 2 | 2 | Carbamidomethylation | 35638  | PREDICTED: serine/threonine-protein phosphatase PP1 isozyme 4 [Vitis vinifera]            |
| 2059 | 18860 | gi 566192855 | 47.63 | 3  | 1 | 1 |                      | 34711  | hypothetical protein POPTR_0010s26140g [Populus trichocarpa]                              |
| 1810 | 2400  | gi 225434808 | 47.61 | 3  | 1 | 1 |                      | 32777  | PREDICTED: eukaryotic translation initiation factor 3 subunit G-B [Vitis vinifera]        |
| 3064 | 19746 | gi 224085103 | 47.59 | 22 | 1 | 1 | Carbamidomethylation | 7996   | ubiquinol-cytochrome C reductase complex 7.8 kDa family protein [Populus trichocarpa]     |
| 2353 | 1913  | gi 731398376 | 47.56 | 3  | 1 | 1 |                      | 49041  | PREDICTED: D-lactate dehydrogenase [cytochrome] mitochondrial isoform X2 [Vitis vinifera] |
| 2188 | 19570 | gi 566214582 | 47.54 | 7  | 1 | 1 |                      | 23541  | SNF7 family protein [Populus trichocarpa]                                                 |
| 2069 | 1758  | gi 359495836 | 47.51 | 3  | 2 | 1 |                      | 64385  | PREDICTED: galacturonosyltransferase 8 [Vitis vinifera]                                   |
| 2677 | 2143  | gi 225444537 | 47.44 | 3  | 1 | 1 | Carbamidomethylation | 42935  | PREDICTED: uncharacterized protein LOC100253669 [Vitis vinifera]                          |
| 2226 | 2473  | gi 225465847 | 47.4  | 8  | 1 | 1 |                      | 21605  | PREDICTED: NADPH:quinone oxidoreductase [Vitis vinifera]                                  |
| 1579 | 3312  | gi 225439821 | 47.29 | 1  | 2 | 1 | Carbamidomethylation | 116087 | PREDICTED: calcium-transporting ATPase 4 endoplasmic reticulum-type-like [Vitis vinifera] |
| 1808 | 19159 | gi 224101399 | 47.26 | 2  | 1 | 1 |                      | 49569  | kinase family protein [Populus trichocarpa]                                               |
| 2218 | 19041 | gi 566177717 | 47.25 | 7  | 1 | 1 | Carbamidomethylation | 20905  | zinc knuckle family protein [Populus trichocarpa]                                         |

|      |       |              |       |    |   |   |                      |       |                                                                                                            |
|------|-------|--------------|-------|----|---|---|----------------------|-------|------------------------------------------------------------------------------------------------------------|
| 2955 | 19336 | gi 225444159 | 47.25 | 5  | 1 | 1 |                      | 32002 | PREDICTED: coatomer subunit epsilon-1 [Vitis vinifera]                                                     |
| 1746 | 1735  | gi 225451318 | 47.24 | 4  | 1 | 1 |                      | 37997 | PREDICTED: probable aldo-keto reductase 1 [Vitis vinifera]                                                 |
| 2135 | 2189  | gi 526118301 | 47.03 | 4  | 1 | 1 |                      | 41463 | cysteine protease precursor [Vitis vinifera]                                                               |
| 2167 | 18765 | gi 566188404 | 47.01 | 3  | 1 | 1 |                      | 40604 | pantothenate kinase-related family protein [Populus trichocarpa]                                           |
| 1963 | 1383  | gi 359476759 | 46.93 | 3  | 1 | 1 |                      | 47072 | PREDICTED: basic leucine zipper and W2 domain-containing protein 2 [Vitis vinifera]                        |
| 2082 | 18287 | gi 224120380 | 46.79 | 4  | 2 | 1 |                      | 61938 | hypothetical protein POPTR_0012s03790g [Populus trichocarpa]                                               |
| 2227 | 1854  | gi 225470285 | 46.75 | 5  | 1 | 1 |                      | 32382 | PREDICTED: ATP-dependent Clp protease proteolytic subunit-related protein 2 chloroplastic [Vitis vinifera] |
| 1702 | 1695  | gi 731408423 | 46.68 | 4  | 2 | 2 | Carbamidomethylation | 43098 | PREDICTED: serine carboxypeptidase-like 18 isoform X4 [Vitis vinifera]                                     |
| 1651 | 18227 | gi 566196001 | 46.66 | 13 | 2 | 1 | Carbamidomethylation | 17516 | dimethylmenaquinone methyltransferase family protein [Populus trichocarpa]                                 |
| 1993 | 3173  | gi 731382683 | 46.63 | 5  | 2 | 1 | Carbamidomethylation | 56461 | PREDICTED: probable serine/threonine-protein kinase At4g35230 [Vitis vinifera]                             |
| 2221 | 19296 | gi 566205313 | 46.58 | 5  | 1 | 1 |                      | 28442 | glucosamine/galactosamine-6-phosphate isomerase family protein [Populus trichocarpa]                       |
| 2009 | 19793 | gi 566181894 | 46.57 | 2  | 1 | 1 |                      | 58001 | hypothetical protein POPTR_0008s02250g [Populus trichocarpa]                                               |
| 2396 | 18831 | gi 224126789 | 46.54 | 2  | 1 | 1 |                      | 65325 | pyridine nucleotide-disulfide oxidoreductase family protein [Populus trichocarpa]                          |

|      |       |              |       |   |   |   |                      |        |                                                                                                                              |
|------|-------|--------------|-------|---|---|---|----------------------|--------|------------------------------------------------------------------------------------------------------------------------------|
| 1638 | 1861  | gi 731428311 | 46.48 | 2 | 1 | 1 |                      | 51458  | PREDICTED: bifunctional aspartate aminotransferase and glutamate/aspartate-prephenate aminotransferase-like [Vitis vinifera] |
| 2125 | 18407 | gi 566158256 | 46.35 | 6 | 2 | 1 | Carbamidomethylation | 39552  | hypothetical protein POPTR_0002s15850g [Populus trichocarpa]                                                                 |
| 2394 | 18538 | gi 224090627 | 46.3  | 2 | 2 | 2 | Carbamidomethylation | 157531 | WD-40 repeat family protein [Populus trichocarpa]                                                                            |
| 2008 | 19792 | gi 566210696 | 46.12 | 3 | 1 | 1 |                      | 42582  | hypothetical protein POPTR_0017s01530g [Populus trichocarpa]                                                                 |
| 908  | 18901 | gi 566198700 | 46.09 | 4 | 2 | 1 |                      | 42593  | hypothetical protein POPTR_0013s00760g [Populus trichocarpa]                                                                 |
| 2163 | 1686  | gi 225456369 | 46.08 | 9 | 2 | 2 |                      | 23558  | PREDICTED: nuclear transcription factor Y subunit C-1 isoform X1 [Vitis vinifera]                                            |
| 2195 | 19773 | gi 566160873 | 46.01 | 9 | 1 | 1 | Carbamidomethylation | 25118  | hypothetical protein POPTR_0003s04700g [Populus trichocarpa]                                                                 |
| 2961 | 2398  | gi 225435925 | 46    | 3 | 1 | 1 | Carbamidomethylation | 50361  | PREDICTED: cysteine desulfurase 2 chloroplastic [Vitis vinifera]                                                             |
| 1244 | 2470  | gi 225442639 | 45.9  | 9 | 1 | 1 |                      | 15488  | PREDICTED: uncharacterized protein LOC100260053 [Vitis vinifera]                                                             |
| 2044 | 1904  | gi 225431685 | 45.86 | 2 | 2 | 1 |                      | 92333  | PREDICTED: probable methyltransferase PMT26 [Vitis vinifera]                                                                 |
| 2801 | 2365  | gi 225441864 | 45.85 | 3 | 1 | 1 | Carbamidomethylation | 57917  | PREDICTED: thioredoxin reductase NTRC [Vitis vinifera]                                                                       |
| 1916 | 2154  | gi 225458519 | 45.77 | 2 | 1 | 1 | Carbamidomethylation | 75018  | PREDICTED: uncharacterized protein LOC100267853 [Vitis vinifera]                                                             |
| 1279 | 18829 | gi 566179807 | 45.75 | 2 | 1 | 1 |                      | 51892  | hypothetical protein POPTR_0007s05880g [Populus trichocarpa]                                                                 |

|      |       |              |       |    |   |   |                      |        |                                                                                            |
|------|-------|--------------|-------|----|---|---|----------------------|--------|--------------------------------------------------------------------------------------------|
| 2491 | 19769 | gi 566175218 | 45.72 | 10 | 1 | 1 | Carbamidomethylation | 12754  | hypothetical protein POPTR_0006s08530g [Populus trichocarpa]                               |
| 2006 | 2585  | gi 225435395 | 45.71 | 3  | 1 | 1 | Carbamidomethylation | 35206  | PREDICTED: cinnamoyl-CoA reductase 1 [Vitis vinifera]                                      |
| 2105 | 1794  | gi 225452562 | 45.69 | 3  | 1 | 1 |                      | 35739  | PREDICTED: peroxidase 31-like [Vitis vinifera]                                             |
| 1728 | 2412  | gi 225453100 | 45.68 | 4  | 1 | 1 |                      | 34790  | PREDICTED: ATP-dependent Clp protease proteolytic subunit 3 chloroplastic [Vitis vinifera] |
| 2007 | 2373  | gi 731384063 | 45.64 | 3  | 1 | 1 |                      | 43516  | PREDICTED: LL-diaminopimelate aminotransferase chloroplastic isoform X7 [Vitis vinifera]   |
| 2172 | 19167 | gi 224143157 | 45.59 | 1  | 1 | 1 |                      | 73679  | clathrin assembly family protein [Populus trichocarpa]                                     |
| 2180 | 2415  | gi 225450075 | 45.55 | 3  | 1 | 1 |                      | 41952  | PREDICTED: peptidyl-prolyl cis-trans isomerase FKBP42 [Vitis vinifera]                     |
| 2037 | 19354 | gi 224062258 | 45.51 | 4  | 1 | 1 |                      | 28277  | NADH-ubiquinone oxidoreductase 24 kDa subunit family protein [Populus trichocarpa]         |
| 1084 | 1395  | gi 731435511 | 45.49 | 1  | 2 | 1 |                      | 152684 | PREDICTED: putative disease resistance RPP13-like protein 1 isoform X2 [Vitis vinifera]    |
| 2395 | 18626 | gi 225454791 | 45.39 | 1  | 1 | 1 |                      | 70066  | PREDICTED: ATPase family AAA domain-containing protein 3-B [Vitis vinifera]                |
| 2228 | 19806 | gi 224113431 | 45.32 | 11 | 1 | 1 |                      | 9789   | hypothetical protein POPTR_0010s24670g [Populus trichocarpa]                               |
| 2793 | 19082 | gi 731405196 | 45.27 | 1  | 1 | 1 | Carbamidomethylation | 102309 | PREDICTED: uncharacterized protein LOC100254898 isoform X2 [Vitis vinifera]                |
| 2101 | 18450 | gi 566210049 | 45.19 | 1  | 1 | 1 |                      | 96663  | hypothetical protein POPTR_0016s13160g [Populus trichocarpa]                               |
| 794  | 2504  | gi 731416298 | 45.14 | 4  | 1 | 1 |                      | 25123  | PREDICTED: eukaryotic translation initiation factor 3 subunit J [Vitis vinifera]           |

|      |       |              |       |   |   |   |                      |        |                                                                                  |
|------|-------|--------------|-------|---|---|---|----------------------|--------|----------------------------------------------------------------------------------|
| 2136 | 19405 | gi 566259912 | 45.13 | 3 | 1 | 1 |                      | 52371  | hypothetical protein POPTR_0022s00470g [Populus trichocarpa]                     |
| 1997 | 1711  | gi 225466119 | 45.04 | 3 | 1 | 1 |                      | 42250  | PREDICTED: luc7-like protein 3 [Vitis vinifera]                                  |
| 2408 | 19489 | gi 224095005 | 45.03 | 4 | 1 | 1 | Carbamidomethylation | 33972  | xyloglucan endotransglycosylase hydrolase 2 family protein [Populus trichocarpa] |
| 2176 | 1726  | gi 225440169 | 45.01 | 2 | 1 | 1 |                      | 57401  | PREDICTED: cytochrome P450 98A2 [Vitis vinifera]                                 |
| 3068 | 2417  | gi 731400181 | 45    | 1 | 1 | 1 |                      | 80319  | PREDICTED: uncharacterized protein C18orf8 isoform X2 [Vitis vinifera]           |
| 2753 | 19149 | gi 566215907 | 44.95 | 1 | 1 | 1 |                      | 131624 | hypothetical protein POPTR_0018s14630g [Populus trichocarpa]                     |
| 1914 | 19018 | gi 224055587 | 44.84 | 4 | 1 | 1 |                      | 40024  | GHMP kinase-related family protein [Populus trichocarpa]                         |
| 1895 | 18935 | gi 566214668 | 44.82 | 3 | 1 | 1 |                      | 53306  | casein kinase family protein [Populus trichocarpa]                               |
| 2372 | 19110 | gi 566206676 | 44.8  | 2 | 1 | 1 |                      | 79072  | hypothetical protein POPTR_0015s08830g [Populus trichocarpa]                     |
| 3065 | 19783 | gi 731396358 | 44.75 | 3 | 1 | 1 |                      | 46292  | PREDICTED: 3-ketoacyl-CoA thiolase 2 peroxisomal-like [Vitis vinifera]           |
| 2190 | 19580 | gi 566155691 | 44.68 | 1 | 1 | 1 |                      | 99018  | ubiquitin family protein [Populus trichocarpa]                                   |
| 2481 | 18891 | gi 566152365 | 44.66 | 5 | 2 | 2 |                      | 43020  | Vacuolar ATP synthase subunit C family protein [Populus trichocarpa]             |
| 1953 | 3245  | gi 225460680 | 44.63 | 7 | 2 | 2 |                      | 37122  | PREDICTED: fructose-1 6-bisphosphatase cytosolic isoform X2 [Vitis vinifera]     |
| 2541 | 1408  | gi 731408196 | 44.58 | 2 | 1 | 1 |                      | 87158  | PREDICTED: subtilisin-like protease isoform X4 [Vitis vinifera]                  |
| 2879 | 19784 | gi 566180489 | 44.57 | 4 | 1 | 1 |                      | 35792  | Peroxidase 50 precursor family protein [Populus trichocarpa]                     |

|      |       |              |       |    |   |   |                      |       |                                                                                                |
|------|-------|--------------|-------|----|---|---|----------------------|-------|------------------------------------------------------------------------------------------------|
| 1729 | 19820 | gi 566210973 | 44.55 | 6  | 1 | 1 |                      | 15927 | hypothetical protein POPTR_0017s02810g [Populus trichocarpa]                                   |
| 2010 | 19808 | gi 566160273 | 44.54 | 6  | 1 | 1 | Carbamidomethylation | 17554 | hypothetical protein POPTR_0003s01440g [Populus trichocarpa]                                   |
| 944  | 1764  | gi 359478415 | 44.49 | 3  | 2 | 1 |                      | 58697 | PREDICTED: beta-glucosidase 12 [Vitis vinifera]                                                |
| 1939 | 19259 | gi 566215941 | 44.44 | 2  | 1 | 1 |                      | 50246 | hypothetical protein POPTR_0018s14790g [Populus trichocarpa]                                   |
| 1321 | 19117 | gi 566173131 | 44.4  | 3  | 1 | 1 |                      | 39060 | dihydroflavonol reductase family protein [Populus trichocarpa]                                 |
| 2178 | 19380 | gi 731407226 | 44.33 | 4  | 1 | 1 | Carbamidomethylation | 37934 | PREDICTED: 2-alkenal reductase (NADP(+)-dependent) [Vitis vinifera]                            |
| 2480 | 18864 | gi 731383454 | 44.29 | 6  | 2 | 2 |                      | 43734 | PREDICTED: probable N-acetyl-gamma-glutamyl-phosphate reductase chloroplastic [Vitis vinifera] |
| 2963 | 19511 | gi 566151722 | 44.16 | 2  | 1 | 1 |                      | 68698 | hypothetical protein POPTR_0001s29700g [Populus trichocarpa]                                   |
| 1622 | 1778  | gi 731427762 | 44.15 | 2  | 2 | 1 |                      | 78808 | PREDICTED: prolyl endopeptidase isoform X2 [Vitis vinifera]                                    |
| 1850 | 19810 | gi 566163928 | 44.15 | 6  | 1 | 1 |                      | 21587 | disease resistance-responsive family protein [Populus trichocarpa]                             |
| 1956 | 1351  | gi 225464146 | 44.11 | 6  | 2 | 1 |                      | 32622 | PREDICTED: protein transport protein SEC13 homolog B [Vitis vinifera]                          |
| 1844 | 1733  | gi 225429462 | 44.1  | 2  | 2 | 2 |                      | 71749 | PREDICTED: far upstream element-binding protein 2 [Vitis vinifera]                             |
| 2954 | 2469  | gi 731394805 | 44.07 | 5  | 1 | 1 |                      | 30948 | PREDICTED: ribosome-recycling factor chloroplastic [Vitis vinifera]                            |
| 909  | 18903 | gi 566146533 | 44.05 | 14 | 2 | 2 |                      | 10147 | acyl-CoA-binding family protein [Populus trichocarpa]                                          |

|      |       |              |       |    |   |   |                      |       |                                                                                                                  |
|------|-------|--------------|-------|----|---|---|----------------------|-------|------------------------------------------------------------------------------------------------------------------|
| 2137 | 2392  | gi 731382564 | 44.04 | 3  | 1 | 1 |                      | 53798 | PREDICTED: aminoacylase-1 isoform X2 [Vitis vinifera]                                                            |
| 2400 | 2395  | gi 225435776 | 44.03 | 3  | 1 | 1 |                      | 66471 | PREDICTED: probable lysine--tRNA ligase cytoplasmic [Vitis vinifera]                                             |
| 1968 | 18997 | gi 566236086 | 44    | 2  | 1 | 1 |                      | 48154 | hypothetical protein POPTR_0019s08450g [Populus trichocarpa]                                                     |
| 2435 | 2151  | gi 225432664 | 43.99 | 2  | 1 | 1 |                      | 64004 | PREDICTED: uncharacterized protein LOC100259596 [Vitis vinifera]                                                 |
| 3066 | 19794 | gi 224073306 | 43.97 | 2  | 1 | 1 |                      | 50609 | hypothetical protein POPTR_0003s01420g [Populus trichocarpa]                                                     |
| 3069 | 19817 | gi 566215175 | 43.9  | 19 | 1 | 1 |                      | 7135  | hypothetical protein POPTR_0018s10540g [Populus trichocarpa]                                                     |
| 1973 | 2457  | gi 526117557 | 43.88 | 4  | 1 | 1 |                      | 32485 | alpha-soluble NSF attachment protein [Vitis vinifera]                                                            |
| 1786 | 19216 | gi 566170063 | 43.84 | 4  | 1 | 1 |                      | 32177 | hypothetical protein POPTR_0005s07750g [Populus trichocarpa]                                                     |
| 2301 | 1805  | gi 731402392 | 43.82 | 3  | 1 | 1 |                      | 65873 | PREDICTED: malonate--CoA ligase isoform X3 [Vitis vinifera]                                                      |
| 1701 | 18582 | gi 566156002 | 43.75 | 6  | 2 | 1 | Carbamidomethylation | 37272 | hypothetical protein POPTR_0002s03260g [Populus trichocarpa]                                                     |
| 2075 | 1877  | gi 731392751 | 43.72 | 3  | 1 | 1 |                      | 45321 | PREDICTED: ATPase GET3-like [Vitis vinifera]                                                                     |
| 2182 | 2477  | gi 731383208 | 43.33 | 4  | 1 | 1 |                      | 29098 | PREDICTED: heterodimeric geranylgeranyl pyrophosphate synthase small subunit chloroplastic-like [Vitis vinifera] |
| 2953 | 2434  | gi 225446899 | 43.26 | 2  | 1 | 1 |                      | 70904 | PREDICTED: DEAD-box ATP-dependent RNA helicase 53-like [Vitis vinifera]                                          |
| 1912 | 18960 | gi 566255736 | 43.22 | 5  | 1 | 1 |                      | 15873 | hypothetical protein POPTR_0483s00200g partial [Populus trichocarpa]                                             |

|      |       |              |       |   |   |   |                      |        |                                                                                                                 |
|------|-------|--------------|-------|---|---|---|----------------------|--------|-----------------------------------------------------------------------------------------------------------------|
| 2073 | 2410  | gi 731412185 | 43.17 | 2 | 1 | 1 |                      | 67073  | PREDICTED: phosphoinositide phospholipase C 6 [Vitis vinifera]                                                  |
| 2076 | 19116 | gi 224078882 | 43.15 | 5 | 1 | 1 | Carbamidomethylation | 34470  | oxidoreductase family protein [Populus trichocarpa]                                                             |
| 1908 | 18882 | gi 224075096 | 43.1  | 1 | 1 | 1 |                      | 73889  | acyl-coA synthetase family protein [Populus trichocarpa]                                                        |
| 2443 | 19371 | gi 566184421 | 43.09 | 3 | 1 | 1 |                      | 45388  | hypothetical protein POPTR_0008s17030g [Populus trichocarpa]                                                    |
| 2230 | 2420  | gi 225447221 | 42.77 | 6 | 1 | 1 |                      | 18627  | PREDICTED: photosystem II repair protein PSB27-H1 chloroplastic [Vitis vinifera]                                |
| 2229 | 19825 | gi 224096296 | 42.74 | 3 | 1 | 1 |                      | 40670  | hypothetical protein POPTR_0007s06500g [Populus trichocarpa]                                                    |
| 2290 | 1975  | gi 731432424 | 42.67 | 1 | 1 | 1 |                      | 90087  | PREDICTED: ubiquitin carboxyl-terminal hydrolase 14 [Vitis vinifera]                                            |
| 1189 | 18932 | gi 731370779 | 42.6  | 2 | 2 | 1 |                      | 114446 | PREDICTED: phosphoenolpyruvate carboxylase 4 isoform X2 [Vitis vinifera]                                        |
| 3067 | 19816 | gi 566197446 | 42.56 | 3 | 1 | 1 |                      | 44436  | hypothetical protein POPTR_0012s08440g [Populus trichocarpa]                                                    |
| 1534 | 19185 | gi 566157031 | 42.54 | 2 | 2 | 1 |                      | 61576  | glycine hydroxymethyltransferase family protein [Populus trichocarpa]                                           |
| 2050 | 1703  | gi 731376062 | 42.52 | 2 | 1 | 1 |                      | 83343  | PREDICTED: urease isoform X2 [Vitis vinifera]                                                                   |
| 3070 | 2554  | gi 731387738 | 42.48 | 3 | 1 | 1 |                      | 36411  | PREDICTED: SAL1 phosphatase isoform X4 [Vitis vinifera]                                                         |
| 1280 | 19106 | gi 224078826 | 42.44 | 4 | 1 | 1 |                      | 24905  | Oxygen-evolving enhancer protein 3-1 [Populus trichocarpa]                                                      |
| 2796 | 19136 | gi 566185250 | 42.24 | 2 | 1 | 1 |                      | 55234  | hypothetical protein POPTR_0008s21950g [Populus trichocarpa]                                                    |
| 2802 | 19475 | gi 731439030 | 42.22 | 5 | 1 | 1 |                      | 34963  | PREDICTED: ATP-dependent Clp protease proteolytic subunit-related protein 4 chloroplastic-like [Vitis vinifera] |



|      |       |              |       |   |   |   |        |                                                                                  |
|------|-------|--------------|-------|---|---|---|--------|----------------------------------------------------------------------------------|
| 2183 | 19483 | gi 225450514 | 42.2  | 8 | 1 | 1 | 15973  | PREDICTED: trafficking protein particle complex subunit 4 [Vitis vinifera]       |
| 2233 | 19884 | gi 225423730 | 42.08 | 6 | 1 | 1 | 16692  | PREDICTED: glycine cleavage system H protein 2 mitochondrial [Vitis vinifera]    |
| 2488 | 2625  | gi 359494696 | 42.03 | 4 | 1 | 1 | 43512  | PREDICTED: fructose-1 6-bisphosphatase chloroplastic [Vitis vinifera]            |
| 1967 | 2206  | gi 225455268 | 42.02 | 3 | 1 | 1 | 34609  | PREDICTED: probable 6-phosphogluconolactonase 4 chloroplastic [Vitis vinifera]   |
| 2012 | 2478  | gi 225430602 | 42    | 5 | 1 | 1 | 21039  | PREDICTED: protein OPI10 homolog [Vitis vinifera]                                |
| 612  | 19403 | gi 566166342 | 41.98 | 1 | 1 | 1 | 95030  | hypothetical protein POPTR_0004s13420g partial [Populus trichocarpa]             |
| 2350 | 1816  | gi 225433688 | 41.97 | 3 | 1 | 1 | 38722  | PREDICTED: eukaryotic translation initiation factor 3 subunit H [Vitis vinifera] |
| 1465 | 3036  | gi 731428733 | 41.88 | 0 | 1 | 1 | 407701 | PREDICTED: E3 ubiquitin-protein ligase UPL2-like [Vitis vinifera]                |
| 1519 | 19858 | gi 566194536 | 41.84 | 4 | 1 | 1 | 28624  | hypothetical protein POPTR_0011s09130g [Populus trichocarpa]                     |
| 2712 | 19140 | gi 225437598 | 41.83 | 1 | 1 | 1 | 130089 | PREDICTED: nodal modulator 1 [Vitis vinifera]                                    |
| 1500 | 19865 | gi 566174225 | 41.79 | 5 | 1 | 1 | 22376  | hypothetical protein POPTR_0006s03170g [Populus trichocarpa]                     |
| 2011 | 19863 | gi 566212628 | 41.72 | 7 | 1 | 1 | 17449  | hypothetical protein POPTR_0017s10800g [Populus trichocarpa]                     |
| 1427 | 18641 | gi 566169633 | 41.69 | 5 | 1 | 1 | 30715  | hypothetical protein POPTR_0005s05400g [Populus trichocarpa]                     |
| 3071 | 19870 | gi 566170203 | 41.5  | 2 | 1 | 1 | 70724  | hypothetical protein POPTR_0005s08490g [Populus trichocarpa]                     |

|      |       |              |       |    |   |   |                      |        |                                                                             |
|------|-------|--------------|-------|----|---|---|----------------------|--------|-----------------------------------------------------------------------------|
| 2310 | 4083  | gi 225425706 | 41.34 | 2  | 1 | 1 |                      | 69593  | PREDICTED: probable methyltransferase PMT2 [Vitis vinifera]                 |
| 2000 | 19229 | gi 566165862 | 41.22 | 2  | 1 | 1 |                      | 41915  | hypothetical protein POPTR_0004s10130g [Populus trichocarpa]                |
| 2493 | 2091  | gi 225450155 | 41.2  | 4  | 1 | 1 |                      | 26703  | PREDICTED: thylakoid luminal 19 kDa protein chloroplastic [Vitis vinifera]  |
| 1517 | 1743  | gi 225441809 | 41.19 | 11 | 1 | 1 |                      | 8917   | PREDICTED: uncharacterized protein LOC100245204 isoform X3 [Vitis vinifera] |
| 2231 | 19838 | gi 731395888 | 41.18 | 3  | 1 | 1 |                      | 44982  | PREDICTED: protein notum homolog [Vitis vinifera]                           |
| 2492 | 19881 | gi 224128482 | 41.13 | 13 | 1 | 1 | Carbamidomethylation | 9705   | NADH-ubiquinone oxidoreductase-related family protein [Populus trichocarpa] |
| 1626 | 19883 | gi 566189043 | 41.08 | 4  | 1 | 1 | Carbamidomethylation | 36173  | Peroxidase 6 precursor family protein [Populus trichocarpa]                 |
| 2289 | 4368  | gi 225440262 | 41.06 | 1  | 1 | 1 |                      | 142059 | PREDICTED: splicing factor 3B subunit 1 [Vitis vinifera]                    |
| 2482 | 18956 | gi 566162026 | 40.97 | 9  | 2 | 2 | Carbamidomethylation | 27183  | hypothetical protein POPTR_0003s10720g [Populus trichocarpa]                |
| 1906 | 3919  | gi 225461593 | 40.95 | 1  | 1 | 1 |                      | 62767  | PREDICTED: apoptosis inhibitor 5 [Vitis vinifera]                           |
| 2714 | 19480 | gi 224112341 | 40.94 | 3  | 1 | 1 |                      | 46306  | latex abundant family protein [Populus trichocarpa]                         |
| 2232 | 2958  | gi 731419100 | 40.93 | 6  | 1 | 1 | Carbamidomethylation | 19892  | PREDICTED: universal stress protein A-like protein [Vitis vinifera]         |
| 2113 | 1793  | gi 225438019 | 40.9  | 4  | 1 | 1 |                      | 44983  | PREDICTED: heterogeneous nuclear ribonucleoprotein 1-like [Vitis vinifera]  |
| 2181 | 19463 | gi 566214148 | 40.88 | 3  | 1 | 1 |                      | 45872  | hypothetical protein POPTR_0018s04060g [Populus trichocarpa]                |
| 2406 | 19378 | gi 566229616 | 40.84 | 4  | 1 | 1 |                      | 39992  | hypothetical protein POPTR_0019s04140g [Populus trichocarpa]                |

|      |       |              |       |    |   |   |                      |       |                                                                                    |
|------|-------|--------------|-------|----|---|---|----------------------|-------|------------------------------------------------------------------------------------|
| 1970 | 19264 | gi 225423909 | 40.83 | 1  | 1 | 1 |                      | 88054 | PREDICTED: mediator of RNA polymerase II transcription subunit 25 [Vitis vinifera] |
| 1730 | 2500  | gi 526117641 | 40.81 | 4  | 1 | 1 |                      | 21825 | type II peroxiredoxin F [Vitis vinifera]                                           |
| 2184 | 2596  | gi 225453513 | 40.75 | 12 | 1 | 1 |                      | 8552  | PREDICTED: protein transport protein Sec61 subunit beta-like [Vitis vinifera]      |
| 2494 | 1810  | gi 225464882 | 40.73 | 2  | 1 | 1 |                      | 62406 | PREDICTED: nicalin-1 [Vitis vinifera]                                              |
| 2375 | 1992  | gi 225453494 | 40.71 | 1  | 1 | 1 |                      | 82431 | PREDICTED: elongation factor G-2 mitochondrial [Vitis vinifera]                    |
| 2484 | 19061 | gi 224094809 | 40.69 | 2  | 1 | 1 |                      | 62357 | hypothetical protein POPTR_0007s13050g [Populus trichocarpa]                       |
| 2131 | 19169 | gi 225464210 | 40.69 | 4  | 1 | 1 | Carbamidomethylation | 49642 | PREDICTED: probable pectate lyase 8 [Vitis vinifera]                               |
| 2800 | 2087  | gi 731440022 | 40.67 | 3  | 1 | 1 |                      | 73346 | PREDICTED: phosphoenolpyruvate carboxykinase [ATP]-like [Vitis vinifera]           |
| 2870 | 19184 | gi 731399255 | 40.52 | 3  | 1 | 1 |                      | 52783 | PREDICTED: dnaJ protein P58IPK homolog [Vitis vinifera]                            |
| 2234 | 19917 | gi 566157925 | 40.31 | 3  | 1 | 1 |                      | 38251 | transcription factor family protein [Populus trichocarpa]                          |
| 2436 | 18967 | gi 224143772 | 40.28 | 2  | 1 | 1 |                      | 72623 | calmodulin-binding family protein [Populus trichocarpa]                            |
| 2441 | 19360 | gi 224106974 | 40.26 | 4  | 1 | 1 |                      | 29365 | SNARE 12 family protein [Populus trichocarpa]                                      |
| 2869 | 19142 | gi 566146661 | 40.21 | 3  | 1 | 1 |                      | 54980 | GHMP kinase family protein [Populus trichocarpa]                                   |
| 1475 | 1676  | gi 225428560 | 40.19 | 2  | 2 | 1 |                      | 83942 | PREDICTED: phospholipase A-2-activating protein isoform X3 [Vitis vinifera]        |
| 2454 | 2413  | gi 359475077 | 40.11 | 2  | 1 | 1 | Carbamidomethylation | 75336 | PREDICTED: tRNA-dihydrouridine(47) synthase [NAD(P)(+)]-like [Vitis vinifera]      |
| 1532 | 5075  | gi 225424713 | 40.09 | 2  | 2 | 1 |                      | 96484 | PREDICTED: AP-1 complex subunit gamma-2 [Vitis vinifera]                           |

|      |       |              |       |   |   |   |                      |       |                                                                                   |
|------|-------|--------------|-------|---|---|---|----------------------|-------|-----------------------------------------------------------------------------------|
| 1851 | 2533  | gi 359494249 | 40.09 | 4 | 1 | 1 |                      | 21360 | PREDICTED: photosystem I reaction center subunit V chloroplastic [Vitis vinifera] |
| 2496 | 2458  | gi 731433370 | 40.06 | 6 | 1 | 1 |                      | 26707 | PREDICTED: protein CWC15 homolog isoform X2 [Vitis vinifera]                      |
| 2399 | 19150 | gi 566182120 | 40.03 | 4 | 1 | 1 |                      | 30970 | hypothetical protein POPTR_0008s03290g [Populus trichocarpa]                      |
| 3072 | 19879 | gi 566209743 | 39.91 | 5 | 1 | 1 |                      | 26607 | hypothetical protein POPTR_0016s11470g [Populus trichocarpa]                      |
| 1832 | 2187  | gi 359496589 | 39.9  | 3 | 1 | 1 |                      | 41483 | PREDICTED: clathrin light chain 1 [Vitis vinifera]                                |
| 1731 | 19921 | gi 566210424 | 39.76 | 3 | 1 | 1 |                      | 35704 | hypothetical protein POPTR_0017s00350g [Populus trichocarpa]                      |
| 1154 | 19118 | gi 224124994 | 39.7  | 5 | 1 | 1 |                      | 17963 | hypothetical protein POPTR_0013s00850g [Populus trichocarpa]                      |
| 1678 | 19364 | gi 566164258 | 39.7  | 2 | 1 | 1 |                      | 59785 | hypothetical protein POPTR_0004s00900g [Populus trichocarpa]                      |
| 1890 | 18988 | gi 224072767 | 39.68 | 4 | 1 | 1 |                      | 29070 | hypothetical protein POPTR_0003s18420g [Populus trichocarpa]                      |
| 2165 | 18638 | gi 224093896 | 39.58 | 7 | 2 | 1 |                      | 27844 | hypothetical protein POPTR_0007s06770g [Populus trichocarpa]                      |
| 2455 | 19908 | gi 731409599 | 39.54 | 3 | 1 | 1 |                      | 39025 | PREDICTED: GDSL esterase/lipase At4g26790-like [Vitis vinifera]                   |
| 2089 | 18993 | gi 566235447 | 39.48 | 3 | 1 | 1 | Carbamidomethylation | 30476 | hypothetical protein POPTR_0019s08170g partial [Populus trichocarpa]              |
| 2956 | 19343 | gi 224115158 | 39.3  | 8 | 1 | 1 |                      | 16558 | RNA-binding family protein [Populus trichocarpa]                                  |
| 2495 | 2528  | gi 225433606 | 39.24 | 3 | 1 | 1 |                      | 46608 | PREDICTED: UBX domain-containing protein 4 [Vitis vinifera]                       |

|      |       |              |       |    |   |   |                      |        |                                                                                  |
|------|-------|--------------|-------|----|---|---|----------------------|--------|----------------------------------------------------------------------------------|
| 2499 | 19925 | gi 224079549 | 39.22 | 3  | 1 | 1 | Carbamidomethylation | 44567  | METHIONINE AMINOPEPTIDASE 2A family protein [Populus trichocarpa]                |
| 2634 | 19152 | gi 225455232 | 39.16 | 4  | 1 | 1 |                      | 39694  | PREDICTED: polyadenylate-binding protein-interacting protein 12 [Vitis vinifera] |
| 2611 | 18970 | gi 566167505 | 39.11 | 2  | 1 | 1 |                      | 112715 | adaptin family protein [Populus trichocarpa]                                     |
| 2191 | 19591 | gi 224117732 | 39.08 | 1  | 1 | 1 |                      | 104104 | nucleoporin family protein [Populus trichocarpa]                                 |
| 2497 | 2502  | gi 225424908 | 38.94 | 4  | 1 | 1 |                      | 29426  | PREDICTED: mitochondrial outer membrane protein porin of 36 kDa [Vitis vinifera] |
| 1706 | 3386  | gi 731395454 | 38.9  | 7  | 2 | 2 |                      | 19689  | PREDICTED: uncharacterized protein OsI_027940 isoform X2 [Vitis vinifera]        |
| 2072 | 2136  | gi 731388161 | 38.88 | 2  | 1 | 1 |                      | 80692  | PREDICTED: uncharacterized protein LOC100258488 isoform X2 [Vitis vinifera]      |
| 1915 | 19022 | gi 566168505 | 38.8  | 2  | 1 | 1 |                      | 79078  | hypothetical protein POPTR_0005s00240g [Populus trichocarpa]                     |
| 2502 | 19943 | gi 566210850 | 38.76 | 3  | 1 | 1 |                      | 41273  | hypothetical protein POPTR_0017s02230g [Populus trichocarpa]                     |
| 2498 | 19923 | gi 224074373 | 38.68 | 3  | 1 | 1 |                      | 44452  | 26S proteasome regulatory subunit family protein [Populus trichocarpa]           |
| 2873 | 5119  | gi 731392421 | 38.64 | 3  | 1 | 1 |                      | 32565  | PREDICTED: glutathione S-transferase L3-like isoform X2 [Vitis vinifera]         |
| 2500 | 2524  | gi 225452110 | 38.44 | 10 | 1 | 1 | Carbamidomethylation | 9858   | PREDICTED: non-specific lipid-transfer protein 2-like [Vitis vinifera]           |
| 2708 | 18968 | gi 224103873 | 38.34 | 4  | 1 | 1 | Carbamidomethylation | 35544  | putative cinnamoyl-CoA reductase family protein [Populus trichocarpa]            |
| 1590 | 18890 | gi 566159528 | 38.31 | 2  | 1 | 1 |                      | 59138  | acyl-CoA dehydrogenase-related family protein [Populus trichocarpa]              |

|      |       |              |       |   |   |   |                      |       |                                                                                            |
|------|-------|--------------|-------|---|---|---|----------------------|-------|--------------------------------------------------------------------------------------------|
| 2179 | 2100  | gi 731427257 | 38.25 | 4 | 1 | 1 |                      | 22951 | PREDICTED: miraculin-like [Vitis vinifera]                                                 |
| 1455 | 19941 | gi 566186111 | 38.24 | 8 | 1 | 1 |                      | 12191 | hypothetical protein POPTR_0009s03520g partial [Populus trichocarpa]                       |
| 2501 | 19934 | gi 731379459 | 38.22 | 3 | 1 | 1 |                      | 51544 | PREDICTED: methyl-CpG-binding domain-containing protein 13 isoform X4 [Vitis vinifera]     |
| 1961 | 18619 | gi 225468302 | 38.21 | 7 | 2 | 1 | Carbamidomethylation | 35578 | PREDICTED: peroxidase 66 [Vitis vinifera]                                                  |
| 2875 | 19423 | gi 566213671 | 38.17 | 3 | 1 | 1 |                      | 41079 | hypothetical protein POPTR_0018s01560g [Populus trichocarpa]                               |
| 2452 | 2544  | gi 731382451 | 38.15 | 2 | 1 | 1 |                      | 59004 | PREDICTED: bifunctional dihydrofolate reductase-thymidylate synthase-like [Vitis vinifera] |
| 2235 | 19947 | gi 224084924 | 38.12 | 4 | 1 | 1 | Carbamidomethylation | 22828 | Proteasome subunit beta type 3-2 family protein [Populus trichocarpa]                      |
| 2140 | 19946 | gi 566206307 | 38.09 | 3 | 1 | 1 |                      | 42484 | nuclear transport factor 2 family protein [Populus trichocarpa]                            |
| 1943 | 2560  | gi 225428263 | 37.89 | 7 | 1 | 1 |                      | 14294 | PREDICTED: small nuclear ribonucleoprotein Sm D3 [Vitis vinifera]                          |
| 1614 | 20214 | gi 566156678 | 37.87 | 6 | 1 | 1 |                      | 23173 | hypothetical protein POPTR_0002s07090g [Populus trichocarpa]                               |
| 2403 | 19309 | gi 224097184 | 37.71 | 2 | 1 | 1 |                      | 73308 | Phosphoenolpyruvate carboxykinase family protein [Populus trichocarpa]                     |
| 2192 | 1899  | gi 225444143 | 37.65 | 3 | 1 | 1 |                      | 56177 | PREDICTED: patellin-4 [Vitis vinifera]                                                     |
| 2369 | 18780 | gi 224141359 | 37.61 | 3 | 1 | 1 |                      | 40664 | hypothetical protein POPTR_0017s11530g [Populus trichocarpa]                               |
| 1886 | 19065 | gi 359476173 | 37.59 | 2 | 1 | 1 |                      | 64986 | PREDICTED: cysteine--tRNA ligase cytoplasmic isoform X1 [Vitis vinifera]                   |

|      |       |              |       |    |   |   |                      |        |                                                                                  |
|------|-------|--------------|-------|----|---|---|----------------------|--------|----------------------------------------------------------------------------------|
| 2130 | 19030 | gi 566167266 | 37.58 | 4  | 1 | 1 |                      | 37830  | hypothetical protein POPTR_0004s18610g [Populus trichocarpa]                     |
| 2958 | 19372 | gi 731438600 | 37.49 | 3  | 1 | 1 |                      | 59387  | PREDICTED: serine--tRNA ligase mitochondrial [Vitis vinifera]                    |
| 2456 | 1881  | gi 731426493 | 37.47 | 5  | 1 | 1 | Carbamidomethylation | 34081  | PREDICTED: inositol polyphosphate multikinase beta [Vitis vinifera]              |
| 2451 | 19586 | gi 566205032 | 37.46 | 3  | 1 | 1 | Carbamidomethylation | 37930  | hypothetical protein POPTR_0014s18850g [Populus trichocarpa]                     |
| 1627 | 2600  | gi 526117629 | 37.33 | 8  | 1 | 1 | Carbamidomethylation | 11686  | lipid transfer protein precursor [Vitis vinifera]                                |
| 2171 | 19115 | gi 566156766 | 37.31 | 2  | 2 | 1 | Carbamidomethylation | 91787  | hypothetical protein POPTR_0002s07640g [Populus trichocarpa]                     |
| 3075 | 2014  | gi 225446046 | 37.28 | 3  | 1 | 1 |                      | 42983  | PREDICTED: afadin- and alpha-actinin-binding protein isoform X2 [Vitis vinifera] |
| 2449 | 5615  | gi 225470242 | 37.24 | 6  | 1 | 1 |                      | 16680  | PREDICTED: uncharacterized protein At5g48480 [Vitis vinifera]                    |
| 2013 | 19960 | gi 566150184 | 37.15 | 5  | 1 | 1 |                      | 23580  | hypothetical protein POPTR_0001s21460g [Populus trichocarpa]                     |
| 1907 | 18840 | gi 731433439 | 37.03 | 1  | 1 | 1 |                      | 203049 | PREDICTED: proteasome activator subunit 4 [Vitis vinifera]                       |
| 2429 | 3034  | gi 225463799 | 37    | 15 | 2 | 2 | Carbamidomethylation | 13178  | PREDICTED: transcription elongation factor SPT4 homolog 2 [Vitis vinifera]       |
| 2185 | 19506 | gi 566167219 | 36.89 | 1  | 1 | 1 |                      | 69580  | hypothetical protein POPTR_0004s18320g [Populus trichocarpa]                     |
| 3073 | 19953 | gi 566205586 | 36.86 | 4  | 1 | 1 |                      | 33515  | hypothetical protein POPTR_0015s03360g [Populus trichocarpa]                     |
| 2503 | 19961 | gi 566204052 | 36.85 | 2  | 1 | 1 |                      | 46261  | hypothetical protein POPTR_0014s13120g [Populus trichocarpa]                     |
| 1245 | 19970 | gi 224135953 | 36.79 | 16 | 1 | 1 |                      | 6931   | 40S ribosomal protein S30 [Populus trichocarpa]                                  |

|      |       |              |       |    |   |   |                      |        |                                                                                        |
|------|-------|--------------|-------|----|---|---|----------------------|--------|----------------------------------------------------------------------------------------|
| 2174 | 2259  | gi 225431922 | 36.77 | 13 | 1 | 1 |                      | 13225  | PREDICTED: DNA-directed RNA polymerases II IV and V subunit 9A [Vitis vinifera]        |
| 2442 | 19369 | gi 224067716 | 36.77 | 11 | 1 | 1 | Carbamidomethylation | 13535  | hypothetical protein POPTR_0002s14760g [Populus trichocarpa]                           |
| 2966 | 19600 | gi 566153916 | 36.74 | 2  | 1 | 1 |                      | 57345  | hypothetical protein POPTR_0001s40690g [Populus trichocarpa]                           |
| 1910 | 18888 | gi 225423849 | 36.73 | 2  | 1 | 1 |                      | 65257  | PREDICTED: protein decapping 5 [Vitis vinifera]                                        |
| 2134 | 19232 | gi 224077516 | 36.71 | 2  | 1 | 1 |                      | 59212  | 4-coumarate--CoA ligase family protein [Populus trichocarpa]                           |
| 3077 | 19979 | gi 566188099 | 36.65 | 12 | 1 | 1 |                      | 8182   | hypothetical protein POPTR_0009s15150g [Populus trichocarpa]                           |
| 1833 | 2135  | gi 731379048 | 36.54 | 1  | 1 | 1 |                      | 106833 | PREDICTED: nuclear pore complex protein NUP98A [Vitis vinifera]                        |
| 2965 | 19598 | gi 224126151 | 36.54 | 3  | 1 | 1 |                      | 50523  | transferase family protein [Populus trichocarpa]                                       |
| 3074 | 19955 | gi 225445842 | 36.48 | 6  | 1 | 1 |                      | 21531  | PREDICTED: uncharacterized protein LOC100243229 [Vitis vinifera]                       |
| 2109 | 2594  | gi 731382912 | 36.41 | 2  | 1 | 1 |                      | 81725  | PREDICTED: subtilisin-like protease [Vitis vinifera]                                   |
| 2795 | 19146 | gi 566160209 | 36.27 | 2  | 1 | 1 | Carbamidomethylation | 54758  | hypothetical protein POPTR_0003s011001g partial [Populus trichocarpa]                  |
| 2504 | 2289  | gi 731384376 | 36.26 | 4  | 1 | 1 |                      | 35786  | PREDICTED: cinnamoyl-CoA reductase 1 [Vitis vinifera]                                  |
| 2440 | 19328 | gi 225444641 | 36.25 | 2  | 1 | 1 |                      | 59678  | PREDICTED: 3-oxoacyl-[acyl-carrier-protein] synthase II chloroplastic [Vitis vinifera] |
| 2957 | 19353 | gi 566155202 | 36.24 | 5  | 1 | 1 |                      | 20741  | hypothetical protein POPTR_0001s46330g partial [Populus trichocarpa]                   |
| 2446 | 19439 | gi 224117556 | 36.24 | 4  | 1 | 1 |                      | 25438  | glutathione transferase family protein [Populus trichocarpa]                           |



|      |       |              |       |   |   |   |                      |       |                                                                                    |
|------|-------|--------------|-------|---|---|---|----------------------|-------|------------------------------------------------------------------------------------|
| 2505 | 19986 | gi 224117028 | 36.22 | 8 | 1 | 1 |                      | 15358 | hypothetical protein POPTR_0011s11080g [Populus trichocarpa]                       |
| 2236 | 19969 | gi 225469438 | 36.2  | 6 | 1 | 1 |                      | 17534 | PREDICTED: pollen-specific protein C13 [Vitis vinifera]                            |
| 3078 | 2602  | gi 225424272 | 36.17 | 7 | 1 | 1 |                      | 17200 | PREDICTED: MLP-like protein 34 [Vitis vinifera]                                    |
| 2868 | 19095 | gi 225463253 | 36.16 | 2 | 1 | 1 |                      | 61124 | PREDICTED: DEAD-box ATP-dependent RNA helicase 5 [Vitis vinifera]                  |
| 1830 | 19376 | gi 566208632 | 36.1  | 4 | 1 | 1 |                      | 30390 | hypothetical protein POPTR_0016s04290g [Populus trichocarpa]                       |
| 2409 | 19512 | gi 225444639 | 36.04 | 6 | 1 | 1 |                      | 20529 | PREDICTED: 21 kDa protein [Vitis vinifera]                                         |
| 1937 | 19195 | gi 566188857 | 35.98 | 7 | 1 | 1 |                      | 14979 | hypothetical protein POPTR_0010s02790g [Populus trichocarpa]                       |
| 2486 | 19221 | gi 225443738 | 35.95 | 1 | 1 | 1 |                      | 66499 | PREDICTED: uncharacterized protein LOC100241189 [Vitis vinifera]                   |
| 1300 | 19995 | gi 566208495 | 35.93 | 1 | 1 | 1 |                      | 80383 | DNA topoisomerase 2 family protein [Populus trichocarpa]                           |
| 1362 | 2032  | gi 359474652 | 35.91 | 2 | 1 | 1 |                      | 50670 | PREDICTED: scopoletin glucosyltransferase-like [Vitis vinifera]                    |
| 2750 | 19063 | gi 566149094 | 35.9  | 4 | 1 | 1 | Carbamidomethylation | 26501 | hypothetical protein POPTR_0001s15200g [Populus trichocarpa]                       |
| 2329 | 2241  | gi 225446767 | 35.89 | 2 | 1 | 1 |                      | 40475 | PREDICTED: uncharacterized oxidoreductase At1g06690 chloroplastic [Vitis vinifera] |
| 1809 | 2858  | gi 731411254 | 35.84 | 5 | 1 | 1 |                      | 21305 | PREDICTED: 22.0 kDa class IV heat shock protein-like [Vitis vinifera]              |
| 3076 | 19977 | gi 225456262 | 35.79 | 9 | 1 | 1 |                      | 11952 | PREDICTED: mitochondrial pyruvate carrier 1 [Vitis vinifera]                       |
| 2507 | 20005 | gi 224111560 | 35.77 | 2 | 1 | 1 |                      | 96995 | hydroxyproline-rich glycoprotein [Populus trichocarpa]                             |

|      |       |              |       |    |   |   |  |        |                                                                                                        |
|------|-------|--------------|-------|----|---|---|--|--------|--------------------------------------------------------------------------------------------------------|
| 2412 | 19595 | gi 566192632 | 35.72 | 3  | 1 | 1 |  | 35033  | nodulin 35 family protein [Populus trichocarpa]                                                        |
| 3080 | 2671  | gi 359497879 | 35.56 | 13 | 1 | 1 |  | 12600  | PREDICTED: probable aquaporin TIP-type partial [Vitis vinifera]                                        |
| 2872 | 19334 | gi 224067846 | 35.42 | 4  | 1 | 1 |  | 28816  | hypothetical protein POPTR_0002s15600g [Populus trichocarpa]                                           |
| 808  | 3590  | gi 731418129 | 35.23 | 0  | 1 | 1 |  | 565777 | PREDICTED: auxin transport protein BIG [Vitis vinifera]                                                |
| 3081 | 2631  | gi 225450051 | 35.21 | 3  | 1 | 1 |  | 39579  | PREDICTED: cycloartenol-C-24-methyltransferase [Vitis vinifera]                                        |
| 2139 | 19544 | gi 566164408 | 35.15 | 2  | 1 | 1 |  | 45443  | RNA-binding protein 45 [Populus trichocarpa]                                                           |
| 3079 | 20009 | gi 566201939 | 35.12 | 2  | 1 | 1 |  | 70875  | hypothetical protein POPTR_0014s02040g [Populus trichocarpa]                                           |
| 1828 | 1915  | gi 225443496 | 35.03 | 1  | 1 | 1 |  | 81071  | PREDICTED: DEAD-box ATP-dependent RNA helicase 21-like [Vitis vinifera]                                |
| 2014 | 2527  | gi 526117353 | 34.95 | 3  | 1 | 1 |  | 36687  | mitochondrial alternative oxidase 2 [Vitis vinifera]                                                   |
| 2751 | 1874  | gi 225452328 | 34.94 | 5  | 1 | 1 |  | 44293  | PREDICTED: altered inheritance of mitochondria protein 32 [Vitis vinifera]                             |
| 1913 | 19001 | gi 566150858 | 34.86 | 1  | 1 | 1 |  | 114715 | pumilio/Puf RNA-binding domain-containing family protein [Populus trichocarpa]                         |
| 2962 | 19435 | gi 359486976 | 34.84 | 3  | 1 | 1 |  | 30800  | PREDICTED: uncharacterized protein DS12 from 2D-PAGE of leaf chloroplastic isoform X2 [Vitis vinifera] |
| 2448 | 19527 | gi 566204649 | 34.82 | 3  | 1 | 1 |  | 42787  | hypothetical protein POPTR_0014s16700g [Populus trichocarpa]                                           |
| 2398 | 18910 | gi 566214115 | 34.8  | 2  | 1 | 1 |  | 50293  | DNA repair ATPase-related family protein [Populus trichocarpa]                                         |
| 2447 | 19442 | gi 224094580 | 34.79 | 4  | 1 | 1 |  | 38015  | hypothetical protein POPTR_0007s12020g [Populus trichocarpa]                                           |

|      |       |              |       |    |   |   |  |        |                                                                                                |
|------|-------|--------------|-------|----|---|---|--|--------|------------------------------------------------------------------------------------------------|
| 2509 | 20027 | gi 225456703 | 34.79 | 11 | 1 | 1 |  | 17349  | PREDICTED: ubiquitin-conjugating enzyme E2 2 [Vitis vinifera]                                  |
| 2508 | 2793  | gi 731369035 | 34.69 | 4  | 1 | 1 |  | 29422  | PREDICTED: anthranilate synthase beta subunit 1 chloroplastic-like isoform X2 [Vitis vinifera] |
| 2193 | 19607 | gi 224093148 | 34.62 | 5  | 1 | 1 |  | 29641  | Tetrapyrrole-binding family protein [Populus trichocarpa]                                      |
| 2300 | 19011 | gi 566195960 | 34.51 | 1  | 1 | 1 |  | 205867 | hypothetical protein POPTR_0011s17070g [Populus trichocarpa]                                   |
| 2247 | 2210  | gi 225435307 | 34.5  | 2  | 1 | 1 |  | 49888  | PREDICTED: ruvB-like protein 1 [Vitis vinifera]                                                |
| 2133 | 19202 | gi 224106822 | 34.5  | 2  | 1 | 1 |  | 66805  | ABC transporter family protein [Populus trichocarpa]                                           |
| 3085 | 2659  | gi 225442357 | 34.44 | 5  | 1 | 1 |  | 22473  | PREDICTED: charged multivesicular body protein 1b [Vitis vinifera]                             |
| 3083 | 20020 | gi 224107749 | 34.25 | 2  | 1 | 1 |  | 58085  | eukaryotic translation initiation factor 4B family protein [Populus trichocarpa]               |
| 3082 | 20017 | gi 225449424 | 34.24 | 5  | 1 | 1 |  | 23431  | PREDICTED: thylakoid luminal 15 kDa protein 1 chloroplastic [Vitis vinifera]                   |
| 2035 | 19059 | gi 566164187 | 34.22 | 4  | 1 | 1 |  | 32911  | hypothetical protein POPTR_0004s00590g [Populus trichocarpa]                                   |
| 743  | 19546 | gi 566147155 | 34.21 | 2  | 1 | 1 |  | 62520  | hypothetical protein POPTR_0001s04270g [Populus trichocarpa]                                   |
| 2330 | 6691  | gi 225437318 | 34.12 | 1  | 1 | 1 |  | 157286 | PREDICTED: translocase of chloroplast 159 chloroplastic [Vitis vinifera]                       |
| 2445 | 2120  | gi 731389062 | 34.1  | 5  | 1 | 1 |  | 25568  | PREDICTED: endo-1 3;1 4-beta-D-glucanase-like [Vitis vinifera]                                 |
| 3084 | 20043 | gi 731393417 | 34.03 | 3  | 1 | 1 |  | 43134  | PREDICTED: probable linoleate 9S-lipoxygenase 5 [Vitis vinifera]                               |

|      |       |              |       |    |   |   |                      |       |                                                                                                |
|------|-------|--------------|-------|----|---|---|----------------------|-------|------------------------------------------------------------------------------------------------|
| 2973 | 20082 | gi 566259648 | 33.84 | 7  | 1 | 1 |                      | 16066 | hypothetical protein POPTR_0026s00220g [Populus trichocarpa]                                   |
| 641  | 20075 | gi 224092174 | 33.82 | 4  | 1 | 1 |                      | 36141 | hypothetical protein POPTR_0006s24360g [Populus trichocarpa]                                   |
| 2237 | 2663  | gi 359490173 | 33.75 | 4  | 1 | 1 |                      | 25366 | PREDICTED: clp protease-related protein At4g12060 chloroplastic [Vitis vinifera]               |
| 2959 | 19389 | gi 566188774 | 33.71 | 2  | 1 | 1 |                      | 72607 | hypothetical protein POPTR_0010s02290g [Populus trichocarpa]                                   |
| 2411 | 7014  | gi 225433463 | 33.69 | 1  | 1 | 1 |                      | 98952 | PREDICTED: beta-galactosidase 9 isoform X1 [Vitis vinifera]                                    |
| 2709 | 19009 | gi 224138022 | 33.6  | 2  | 1 | 1 |                      | 84828 | alkaline alpha galactosidase family protein [Populus trichocarpa]                              |
| 1787 | 2753  | gi 225429582 | 33.54 | 1  | 1 | 1 |                      | 98913 | PREDICTED: aminopeptidase M1 [Vitis vinifera]                                                  |
| 2874 | 19399 | gi 224130486 | 33.54 | 13 | 1 | 1 |                      | 9171  | hypothetical protein POPTR_0014s09080g [Populus trichocarpa]                                   |
| 2613 | 19194 | gi 224102881 | 33.53 | 3  | 1 | 1 | Carbamidomethylation | 45777 | tRNA synthetase class 1 family protein [Populus trichocarpa]                                   |
| 1535 | 2681  | gi 225455153 | 33.49 | 4  | 1 | 1 |                      | 26938 | PREDICTED: mitochondrial import inner membrane translocase subunit TIM22-like [Vitis vinifera] |
| 1811 | 2627  | gi 731393556 | 33.32 | 4  | 1 | 1 |                      | 29837 | PREDICTED: rhodanese-like/PpiC domain-containing protein 12 isoform X2 [Vitis vinifera]        |
| 1732 | 2790  | gi 225455278 | 33.15 | 18 | 1 | 1 | Oxidation (M)        | 15102 | PREDICTED: cytochrome b5 isoform E [Vitis vinifera]                                            |
| 2964 | 19550 | gi 731393208 | 33.06 | 2  | 1 | 1 |                      | 64874 | PREDICTED: uncharacterized protein LOC100253639 [Vitis vinifera]                               |
| 2675 | 1731  | gi 359489456 | 33.01 | 4  | 1 | 1 |                      | 26638 | PREDICTED: vesicle-associated protein 1-2 [Vitis vinifera]                                     |
| 1974 | 20096 | gi 224123444 | 32.99 | 10 | 1 | 1 |                      | 14627 | prefoldin family protein [Populus trichocarpa]                                                 |

|      |       |              |       |    |   |   |                      |        |                                                                                          |
|------|-------|--------------|-------|----|---|---|----------------------|--------|------------------------------------------------------------------------------------------|
| 1733 | 2718  | gi 731395801 | 32.99 | 5  | 1 | 1 |                      | 21364  | PREDICTED: nitrogen regulatory protein P-II homolog isoform X2 [Vitis vinifera]          |
| 2376 | 2149  | gi 731382802 | 32.97 | 1  | 1 | 1 |                      | 99070  | PREDICTED: transportin-1 isoform X1 [Vitis vinifera]                                     |
| 2967 | 19614 | gi 225438035 | 32.95 | 4  | 1 | 1 |                      | 26519  | PREDICTED: rho GDP-dissociation inhibitor 1 [Vitis vinifera]                             |
| 2968 | 19616 | gi 566177300 | 32.87 | 3  | 1 | 1 |                      | 34068  | hypothetical protein POPTR_0006s20660g [Populus trichocarpa]                             |
| 2132 | 19200 | gi 566163352 | 32.86 | 2  | 1 | 1 |                      | 85586  | hypothetical protein POPTR_0003s18380g [Populus trichocarpa]                             |
| 3086 | 20107 | gi 224138170 | 32.81 | 11 | 1 | 1 |                      | 7523   | hypothetical protein POPTR_0016s06300g [Populus trichocarpa]                             |
| 2511 | 20101 | gi 566177606 | 32.76 | 16 | 1 | 1 |                      | 9314   | hypothetical protein POPTR_0006s22550g [Populus trichocarpa]                             |
| 1940 | 19267 | gi 225458434 | 32.69 | 2  | 1 | 1 |                      | 58096  | PREDICTED: allene oxide synthase [Vitis vinifera]                                        |
| 2404 | 2219  | gi 731406552 | 32.67 | 3  | 1 | 1 | Carbamidomethylation | 50140  | PREDICTED: angio-associated migratory cell protein-like isoform X2 [Vitis vinifera]      |
| 2015 | 20117 | gi 224129342 | 32.65 | 4  | 1 | 1 |                      | 22803  | Photosystem I reaction center subunit XI family protein [Populus trichocarpa]            |
| 2876 | 2765  | gi 731388932 | 32.54 | 1  | 1 | 1 |                      | 117730 | PREDICTED: uncharacterized protein LOC100244334 [Vitis vinifera]                         |
| 2510 | 20092 | gi 731380117 | 32.53 | 6  | 1 | 1 |                      | 27501  | PREDICTED: thylakoid luminal protein At1g12250 chloroplastic isoform X3 [Vitis vinifera] |
| 2490 | 19612 | gi 566148044 | 32.48 | 3  | 1 | 1 | Carbamidomethylation | 28219  | glutathione S-transferase family protein [Populus trichocarpa]                           |
| 1857 | 2027  | gi 225428747 | 32.44 | 3  | 1 | 1 |                      | 33152  | PREDICTED: 2-hydroxyisoflavanone dehydratase [Vitis vinifera]                            |

|      |       |              |       |   |   |   |                      |       |                                                                                          |
|------|-------|--------------|-------|---|---|---|----------------------|-------|------------------------------------------------------------------------------------------|
| 1774 | 2720  | gi 225470916 | 32.42 | 2 | 1 | 1 | Carbamidomethylation | 52293 | PREDICTED: protein ASPARTIC PROTEASE IN GUARD CELL 2 [Vitis vinifera]                    |
| 3087 | 20110 | gi 566207660 | 32.4  | 7 | 1 | 1 |                      | 21645 | cytochrome b5 domain-containing family protein [Populus trichocarpa]                     |
| 2187 | 2797  | gi 225428420 | 32.38 | 9 | 1 | 1 |                      | 12203 | PREDICTED: 40S ribosomal protein S25-2 [Vitis vinifera]                                  |
| 3088 | 2651  | gi 225465259 | 32.36 | 6 | 1 | 1 |                      | 27590 | PREDICTED: NADPH-dependent pterin aldehyde reductase [Vitis vinifera]                    |
| 2141 | 20108 | gi 566158274 | 32.3  | 3 | 1 | 1 |                      | 34050 | hypothetical protein POPTR_0002s15960g [Populus trichocarpa]                             |
| 2378 | 19525 | gi 566170977 | 32.28 | 3 | 1 | 1 |                      | 29462 | hypothetical protein POPTR_0005s12280g [Populus trichocarpa]                             |
| 2256 | 1179  | gi 225437618 | 32.19 | 4 | 2 | 1 | Carbamidomethylation | 82698 | PREDICTED: probable pre-mRNA-splicing factor ATP-dependent RNA helicase [Vitis vinifera] |
| 3089 | 20121 | gi 566199681 | 32.11 | 7 | 1 | 1 |                      | 14910 | hypothetical protein POPTR_0013s05920g [Populus trichocarpa]                             |
| 1852 | 3038  | gi 225446032 | 31.93 | 4 | 1 | 1 |                      | 19273 | PREDICTED: ribulose biphosphate carboxylase small chain clone 512 [Vitis vinifera]       |
| 2402 | 19256 | gi 224072659 | 31.9  | 2 | 1 | 1 |                      | 53805 | glutathione-disulfide reductase family protein [Populus trichocarpa]                     |
| 2111 | 2046  | gi 731401073 | 31.87 | 2 | 1 | 1 |                      | 75858 | PREDICTED: phosphoinositide phospholipase C 2-like [Vitis vinifera]                      |
| 2239 | 2782  | gi 225459768 | 31.72 | 5 | 1 | 1 |                      | 17006 | PREDICTED: plastocyanin [Vitis vinifera]                                                 |
| 2512 | 2196  | gi 225457367 | 31.72 | 7 | 1 | 1 |                      | 15124 | PREDICTED: peptidyl-prolyl cis-trans isomerase NIMA-interacting 4 [Vitis vinifera]       |
| 2238 | 20118 | gi 224105291 | 31.69 | 3 | 1 | 1 |                      | 38331 | GIANT CHLOROPLAST 1 family protein [Populus trichocarpa]                                 |

|      |       |              |       |    |   |   |                      |       |                                                                                |
|------|-------|--------------|-------|----|---|---|----------------------|-------|--------------------------------------------------------------------------------|
| 2410 | 19530 | gi 224073041 | 31.66 | 3  | 1 | 1 |                      | 25942 | cysteine proteinase inhibitor [Populus trichocarpa]                            |
| 2803 | 19529 | gi 566173751 | 31.65 | 3  | 1 | 1 |                      | 39313 | farnesyl-pyrophosphate synthetase fps2 family protein [Populus trichocarpa]    |
| 2460 | 3297  | gi 731381391 | 31.51 | 1  | 1 | 1 |                      | 60014 | PREDICTED: replication factor C subunit 3-like [Vitis vinifera]                |
| 1972 | 2785  | gi 731408402 | 31.48 | 3  | 1 | 1 |                      | 29415 | PREDICTED: (DL)-glycerol-3-phosphatase 2 [Vitis vinifera]                      |
| 3091 | 20137 | gi 224089182 | 31.28 | 5  | 1 | 1 | Carbamidomethylation | 17094 | zinc finger family protein [Populus trichocarpa]                               |
| 3090 | 20133 | gi 566153514 | 31.22 | 11 | 1 | 1 |                      | 13590 | hypothetical protein POPTR_0001s38670g partial [Populus trichocarpa]           |
| 2970 | 19629 | gi 566157027 | 31.19 | 3  | 1 | 1 |                      | 34854 | hypothetical protein POPTR_0002s09060g [Populus trichocarpa]                   |
| 3092 | 20145 | gi 671743286 | 31.09 | 7  | 1 | 1 |                      | 19547 | NADH-plastoquinone oxidoreductase subunit I (chloroplast) [Camellia petelotii] |
| 2016 | 20158 | gi 566158427 | 31.03 | 7  | 1 | 1 |                      | 17387 | calmodulin 2 family protein [Populus trichocarpa]                              |
| 2241 | 2692  | gi 359479028 | 31.03 | 3  | 1 | 1 |                      | 40721 | PREDICTED: probable trans-2-enoyl-CoA reductase mitochondrial [Vitis vinifera] |
| 2674 | 1843  | gi 359474650 | 31    | 3  | 1 | 1 | Carbamidomethylation | 55226 | PREDICTED: scopoletin glucosyltransferase [Vitis vinifera]                     |
| 2401 | 19171 | gi 225445124 | 30.75 | 3  | 1 | 1 |                      | 67861 | PREDICTED: SNW/SKI-interacting protein [Vitis vinifera]                        |
| 2106 | 18943 | gi 224140195 | 30.45 | 5  | 1 | 1 |                      | 30031 | 29 kDa ribonucleoprotein [Populus trichocarpa]                                 |
| 2969 | 2218  | gi 731422566 | 30.42 | 4  | 1 | 1 |                      | 34464 | PREDICTED: translocase of chloroplast 34 chloroplastic [Vitis vinifera]        |
| 1734 | 2879  | gi 359495735 | 30.39 | 4  | 1 | 1 |                      | 27933 | PREDICTED: uncharacterized protein LOC100855146 [Vitis vinifera]               |
| 2513 | 20159 | gi 731382351 | 30.14 | 2  | 1 | 1 |                      | 43783 | PREDICTED: uncharacterized protein LOC100245856 [Vitis vinifera]               |

|      |       |              |       |   |   |   |                      |        |                                                                                                      |
|------|-------|--------------|-------|---|---|---|----------------------|--------|------------------------------------------------------------------------------------------------------|
| 2199 | 20282 | gi 224109066 | 29.87 | 1 | 1 | 1 |                      | 61143  | hypothetical protein POPTR_0010s17900g [Populus trichocarpa]                                         |
| 2458 | 2721  | gi 225443266 | 29.84 | 3 | 1 | 1 |                      | 39304  | PREDICTED: mitogen-activated protein kinase kinase 5 [Vitis vinifera]                                |
| 3095 | 20200 | gi 224106319 | 29.79 | 3 | 1 | 1 | Carbamidomethylation | 59309  | hypothetical protein POPTR_0009s04630g [Populus trichocarpa]                                         |
| 2194 | 3087  | gi 731391278 | 29.67 | 2 | 1 | 1 | Carbamidomethylation | 56898  | PREDICTED: eukaryotic translation initiation factor 2A [Vitis vinifera]                              |
| 2878 | 2780  | gi 731389634 | 29.65 | 1 | 1 | 1 |                      | 77547  | PREDICTED: LOW QUALITY PROTEIN: 1-aminocyclopropane-1-carboxylate oxidase homolog 1 [Vitis vinifera] |
| 2444 | 4252  | gi 359488906 | 29.6  | 1 | 1 | 1 |                      | 135812 | PREDICTED: ABC transporter B family member 19 [Vitis vinifera]                                       |
| 3093 | 20179 | gi 225445170 | 29.57 | 5 | 1 | 1 |                      | 24265  | PREDICTED: DNA-directed RNA polymerases II and IV subunit 5A [Vitis vinifera]                        |
| 3096 | 2808  | gi 731384926 | 29.55 | 6 | 1 | 1 |                      | 15933  | PREDICTED: 60S ribosomal protein L28-1 isoform X3 [Vitis vinifera]                                   |
| 3097 | 2748  | gi 526117331 | 29.46 | 7 | 1 | 1 |                      | 14247  | thioredoxin h [Vitis vinifera]                                                                       |
| 2977 | 2730  | gi 225439546 | 29.39 | 1 | 1 | 1 |                      | 91491  | PREDICTED: probably inactive leucine-rich repeat receptor-like protein kinase IMK2 [Vitis vinifera]  |
| 2108 | 19006 | gi 731424546 | 29.38 | 1 | 1 | 1 |                      | 95956  | PREDICTED: uncharacterized protein LOC100252015 isoform X4 [Vitis vinifera]                          |
| 3094 | 20198 | gi 225465945 | 29.29 | 1 | 1 | 1 |                      | 100867 | PREDICTED: golgin candidate 6 isoform X1 [Vitis vinifera]                                            |
| 2972 | 19644 | gi 225442791 | 29.2  | 1 | 1 | 1 | Carbamidomethylation | 68124  | PREDICTED: plastidic ATP/ADP-transporter [Vitis vinifera]                                            |
| 2242 | 20217 | gi 225445840 | 29.2  | 5 | 1 | 1 |                      | 38575  | PREDICTED: homoserine kinase [Vitis vinifera]                                                        |



|      |       |              |       |   |   |   |                      |       |                                                                                                 |
|------|-------|--------------|-------|---|---|---|----------------------|-------|-------------------------------------------------------------------------------------------------|
| 2805 | 19632 | gi 731380670 | 29.15 | 3 | 1 | 1 |                      | 31325 | PREDICTED: uncharacterized protein At1g32220 chloroplastic isoform X2 [Vitis vinifera]          |
| 3098 | 20213 | gi 224114830 | 29.14 | 2 | 1 | 1 |                      | 47731 | putative 4-methyl-5(b-hydroxyethyl)-thiazole monophosphate family protein [Populus trichocarpa] |
| 2794 | 19138 | gi 566161892 | 28.64 | 2 | 1 | 1 | Carbamidomethylation | 62833 | hypothetical protein POPTR_0003s09970g [Populus trichocarpa]                                    |
| 2676 | 19213 | gi 566185272 | 28.62 | 2 | 1 | 1 |                      | 58606 | hypothetical protein POPTR_0008s22050g partial [Populus trichocarpa]                            |
| 1891 | 19028 | gi 566198361 | 28.61 | 1 | 1 | 1 |                      | 90791 | hypothetical protein POPTR_0012s13720g [Populus trichocarpa]                                    |
| 3100 | 2792  | gi 225429450 | 28.5  | 6 | 1 | 1 |                      | 22528 | PREDICTED: PITH domain-containing protein 1 [Vitis vinifera]                                    |
| 2877 | 2261  | gi 359487708 | 28.48 | 3 | 1 | 1 |                      | 43172 | PREDICTED: flap endonuclease 1 isoform X2 [Vitis vinifera]                                      |
| 2198 | 5258  | gi 359489366 | 28.34 | 2 | 1 | 1 |                      | 42909 | PREDICTED: fasciclin-like arabinogalactan protein 10 [Vitis vinifera]                           |
| 2196 | 2813  | gi 225427973 | 28.26 | 3 | 1 | 1 |                      | 19853 | PREDICTED: glycine-rich protein 2-like [Vitis vinifera]                                         |
| 2980 | 2752  | gi 359476953 | 28.22 | 3 | 1 | 1 |                      | 34854 | PREDICTED: pre-mRNA-splicing factor ISY1 homolog [Vitis vinifera]                               |
| 1735 | 2815  | gi 225445984 | 28.18 | 7 | 1 | 1 |                      | 15131 | PREDICTED: glutaredoxin-C4 [Vitis vinifera]                                                     |
| 2373 | 2682  | gi 225429325 | 28.17 | 5 | 1 | 1 |                      | 24120 | PREDICTED: thioredoxin domain-containing protein 9 homolog [Vitis vinifera]                     |
| 2514 | 2759  | gi 225464240 | 28.02 | 5 | 1 | 1 |                      | 20829 | PREDICTED: uncharacterized protein At4g13200 chloroplastic [Vitis vinifera]                     |
| 3099 | 20226 | gi 566161648 | 27.96 | 5 | 1 | 1 |                      | 17801 | glycine cleavage system protein H precursor [Populus trichocarpa]                               |

|      |       |              |       |   |   |   |                      |        |                                                                                  |
|------|-------|--------------|-------|---|---|---|----------------------|--------|----------------------------------------------------------------------------------|
| 2405 | 1929  | gi 731421066 | 27.94 | 2 | 1 | 1 |                      | 33932  | PREDICTED: probable fructokinase-7 isoform X2 [Vitis vinifera]                   |
| 2612 | 19034 | gi 566188113 | 27.94 | 1 | 1 | 1 |                      | 113294 | adaptin family protein [Populus trichocarpa]                                     |
| 3101 | 20248 | gi 224121470 | 27.88 | 5 | 1 | 1 |                      | 32058  | 3-PHOSPHOSERINE PHOSPHATASE family protein [Populus trichocarpa]                 |
| 2979 | 4942  | gi 731401567 | 27.88 | 4 | 1 | 1 |                      | 45798  | PREDICTED: 4-coumarate--CoA ligase-like 7 [Vitis vinifera]                       |
| 2885 | 20256 | gi 359497044 | 27.73 | 2 | 1 | 1 |                      | 58077  | PREDICTED: lysosomal Pro-X carboxypeptidase [Vitis vinifera]                     |
| 2974 | 20086 | gi 224096333 | 27.65 | 2 | 1 | 1 |                      | 57960  | hypothetical protein POPTR_0007s06670g [Populus trichocarpa]                     |
| 1853 | 3107  | gi 225450219 | 27.59 | 3 | 1 | 1 |                      | 26900  | PREDICTED: 30S ribosomal protein 2 chloroplastic [Vitis vinifera]                |
| 1854 | 20280 | gi 566186893 | 27.18 | 2 | 1 | 1 |                      | 44046  | hypothetical protein POPTR_0009s08040g [Populus trichocarpa]                     |
| 1945 | 2713  | gi 359481856 | 27.09 | 6 | 1 | 1 |                      | 21178  | PREDICTED: dirigent protein 22-like [Vitis vinifera]                             |
| 3102 | 20265 | gi 731387184 | 27.08 | 2 | 1 | 1 |                      | 61791  | PREDICTED: U1 small nuclear ribonucleoprotein 70 kDa [Vitis vinifera]            |
| 2457 | 20178 | gi 224135493 | 26.98 | 1 | 1 | 1 |                      | 66080  | transducin family protein [Populus trichocarpa]                                  |
| 3103 | 20302 | gi 566170882 | 26.68 | 4 | 1 | 1 |                      | 21960  | HISTONE H1-3 family protein [Populus trichocarpa]                                |
| 2806 | 7631  | gi 731402564 | 26.65 | 1 | 1 | 1 |                      | 100977 | PREDICTED: katanin p60 ATPase-containing subunit A1 [Vitis vinifera]             |
| 2332 | 2147  | gi 225451754 | 26.45 | 3 | 1 | 1 | Carbamidomethylation | 46712  | PREDICTED: eukaryotic translation initiation factor 3 subunit M [Vitis vinifera] |
| 2978 | 2993  | gi 731425464 | 26.29 | 1 | 1 | 1 |                      | 71773  | PREDICTED: RNA polymerase-associated protein LEO1 isoform X2 [Vitis vinifera]    |

|      |       |              |       |   |   |   |  |        |                                                                              |
|------|-------|--------------|-------|---|---|---|--|--------|------------------------------------------------------------------------------|
| 2804 | 19536 | gi 566188433 | 25.94 | 2 | 1 | 1 |  | 73876  | hypothetical protein POPTR_0009s171801g partial [Populus trichocarpa]        |
| 2243 | 3506  | gi 225451561 | 25.79 | 5 | 1 | 1 |  | 20516  | PREDICTED: translocon-associated protein subunit beta [Vitis vinifera]       |
| 2976 | 20188 | gi 566204034 | 25.63 | 2 | 1 | 1 |  | 54966  | hypothetical protein POPTR_0014s13020g [Populus trichocarpa]                 |
| 1480 | 19130 | gi 566211364 | 25.61 | 2 | 1 | 1 |  | 45881  | hypothetical protein POPTR_0017s04550g [Populus trichocarpa]                 |
| 2459 | 20364 | gi 224132674 | 25.61 | 2 | 1 | 1 |  | 40747  | hypothetical protein POPTR_0015s01030g [Populus trichocarpa]                 |
| 2094 | 19363 | gi 225460394 | 25.47 | 1 | 1 | 1 |  | 67755  | PREDICTED: patellin-3 [Vitis vinifera]                                       |
| 3104 | 20346 | gi 225435189 | 24.92 | 7 | 1 | 1 |  | 14801  | PREDICTED: nuclear transcription factor Y subunit B-10-like [Vitis vinifera] |
| 2981 | 20309 | gi 731422386 | 24.68 | 1 | 1 | 1 |  | 94993  | PREDICTED: WEB family protein At5g16730 chloroplastic-like [Vitis vinifera]  |
| 2200 | 2293  | gi 731422266 | 24.54 | 2 | 1 | 1 |  | 60025  | PREDICTED: cytochrome P450 89A2-like [Vitis vinifera]                        |
| 2143 | 20252 | gi 566215395 | 24.5  | 6 | 1 | 1 |  | 21500  | hypothetical protein POPTR_0018s11910g [Populus trichocarpa]                 |
| 3108 | 20416 | gi 566200837 | 24.44 | 8 | 1 | 1 |  | 13900  | ribosomal protein L7Ae/L30e/S12e/Gadd45 [Populus trichocarpa]                |
| 3106 | 20379 | gi 566195508 | 24.44 | 2 | 1 | 1 |  | 46302  | arginine/serine-rich family protein [Populus trichocarpa]                    |
| 3107 | 20401 | gi 731370548 | 24.19 | 2 | 1 | 1 |  | 50905  | PREDICTED: transcription factor TGA2-like [Vitis vinifera]                   |
| 2520 | 20467 | gi 566166948 | 24.07 | 1 | 1 | 1 |  | 116430 | hypothetical protein POPTR_0004s16940g [Populus trichocarpa]                 |

|      |       |              |       |   |   |   |                      |        |                                                                                         |
|------|-------|--------------|-------|---|---|---|----------------------|--------|-----------------------------------------------------------------------------------------|
| 2519 | 20458 | gi 566153056 | 23.93 | 2 | 1 | 1 |                      | 58525  | glucose-6-phosphate 1-dehydrogenase family protein [Populus trichocarpa]                |
| 1543 | 2034  | gi 731399524 | 23.77 | 2 | 1 | 1 |                      | 58565  | PREDICTED: 70 kDa peptidyl-prolyl isomerase-like [Vitis vinifera]                       |
| 2521 | 2819  | gi 225438426 | 23.69 | 2 | 1 | 1 |                      | 80118  | PREDICTED: monosaccharide-sensing protein 2 [Vitis vinifera]                            |
| 2678 | 5138  | gi 731404421 | 23.53 | 3 | 1 | 1 | Carbamidomethylation | 51194  | PREDICTED: monothiol glutaredoxin-S17 isoform X2 [Vitis vinifera]                       |
| 2983 | 5864  | gi 731395998 | 23.5  | 1 | 1 | 1 |                      | 112155 | PREDICTED: poly [ADP-ribose] polymerase 1 [Vitis vinifera]                              |
| 2880 | 4772  | gi 225427419 | 23.42 | 2 | 1 | 1 |                      | 46142  | PREDICTED: COBW domain-containing protein 1 [Vitis vinifera]                            |
| 1593 | 3306  | gi 359490455 | 23.09 | 1 | 1 | 1 |                      | 52229  | PREDICTED: UDP-glycosyltransferase 88A1-like [Vitis vinifera]                           |
| 2522 | 20493 | gi 566191071 | 23.03 | 3 | 1 | 1 |                      | 44571  | hypothetical protein POPTR_0010s16010g [Populus trichocarpa]                            |
| 2886 | 20278 | gi 731393636 | 22.98 | 1 | 1 | 1 |                      | 102554 | PREDICTED: replication factor C subunit 1 [Vitis vinifera]                              |
| 2120 | 21249 | gi 731414681 | 22.71 | 0 | 1 | 1 | Carbamidomethylation | 153010 | PREDICTED: putative disease resistance RPP13-like protein 1 isoform X2 [Vitis vinifera] |
| 2982 | 20423 | gi 224080325 | 22.4  | 3 | 1 | 1 |                      | 41179  | ERECTA-LIKE 4 family protein [Populus trichocarpa]                                      |
| 2758 | 20465 | gi 566161176 | 22.31 | 4 | 1 | 1 |                      | 21945  | germin-like family protein [Populus trichocarpa]                                        |
| 2462 | 20509 | gi 225464926 | 22.28 | 2 | 1 | 1 |                      | 34781  | PREDICTED: N-carbamoylputrescine amidase [Vitis vinifera]                               |
| 2523 | 3109  | gi 225467027 | 22.18 | 6 | 1 | 1 |                      | 16011  | PREDICTED: uncharacterized protein LOC100262366 [Vitis vinifera]                        |
| 2889 | 20422 | gi 224082496 | 22.16 | 3 | 1 | 1 |                      | 38736  | peroxidase precursor family protein [Populus trichocarpa]                               |

|      |       |              |       |   |   |   |                      |       |                                                                        |
|------|-------|--------------|-------|---|---|---|----------------------|-------|------------------------------------------------------------------------|
| 1712 | 20694 | gi 224079413 | 22.08 | 2 | 1 | 1 |                      | 36896 | hypothetical protein<br>POPTR_0004s09110g [Populus<br>trichocarpa]     |
| 3114 | 20632 | gi 566174372 | 21.93 | 8 | 1 | 1 | Carbamidomethylation | 12415 | hypothetical protein<br>POPTR_0006s04020g [Populus<br>trichocarpa]     |
| 2989 | 20605 | gi 225467859 | 21.87 | 3 | 1 | 1 | Carbamidomethylation | 33928 | PREDICTED: chlorophyllase-1<br>[Vitis vinifera]                        |
| 3111 | 20551 | gi 731427546 | 21.86 | 6 | 1 | 1 |                      | 33441 | PREDICTED: cinnamoyl-CoA<br>reductase 2 isoform X2 [Vitis<br>vinifera] |
| 1834 | 20644 | gi 566185390 | 21.66 | 5 | 1 | 1 |                      | 32450 | hypothetical protein<br>POPTR_0008s22600g [Populus<br>trichocarpa]     |

Table S5 The identified proteins in HY2

| Protein Group | Protein ID | Accession    | -10lgP | Coverage (%) | #Peptides | #Unique | PTM                                 | Avg. Mass | Description                                                                        |
|---------------|------------|--------------|--------|--------------|-----------|---------|-------------------------------------|-----------|------------------------------------------------------------------------------------|
| 8             | 6          | gi 359495606 | 305.96 | 52           | 48        | 3       | Carbamidomethylation; Oxidation (M) | 80006     | PREDICTED: heat shock cognate protein 80 [Vitis vinifera]                          |
| 9             | 7          | gi 225462013 | 303.99 | 51           | 47        | 3       | Carbamidomethylation                | 80849     | PREDICTED: heat shock cognate protein 80-like [Vitis vinifera]                     |
| 22            | 4          | gi 225470745 | 294.51 | 74           | 38        | 1       | Carbamidomethylation; Oxidation (M) | 50553     | PREDICTED: tubulin beta-1 chain [Vitis vinifera]                                   |
| 30            | 16395      | gi 566195847 | 292.87 | 65           | 37        | 1       | Carbamidomethylation; Oxidation (M) | 50164     | tubulin beta chain family protein [Populus trichocarpa]                            |
| 13            | 8          | gi 225426164 | 284.87 | 41           | 37        | 2       | Carbamidomethylation                | 80852     | PREDICTED: heat shock protein 83 [Vitis vinifera]                                  |
| 12            | 16417      | gi 224056837 | 284.19 | 40           | 38        | 2       | Carbamidomethylation; Oxidation (M) | 80026     | hypothetical protein POPTR_0001s47020g [Populus trichocarpa]                       |
| 18            | 5          | gi 359486799 | 283.62 | 54           | 37        | 2       | Carbamidomethylation; Oxidation (M) | 71171     | PREDICTED: heat shock cognate 70 kDa protein 2 [Vitis vinifera]                    |
| 40            | 17         | gi 225434722 | 280.01 | 65           | 35        | 2       | Carbamidomethylation                | 50275     | PREDICTED: tubulin beta-2 chain [Vitis vinifera]                                   |
| 21            | 16410      | gi 566191989 | 278.18 | 54           | 36        | 1       | Carbamidomethylation; Oxidation (M) | 71140     | heat shock protein 70 cognate [Populus trichocarpa]                                |
| 1             | 16404      | gi 224055984 | 276.61 | 72           | 27        | 3       | Carbamidomethylation                | 41696     | actin family protein [Populus trichocarpa]                                         |
| 2             | 12         | gi 731410014 | 274.7  | 70           | 26        | 1       | Carbamidomethylation                | 41593     | PREDICTED: actin-101 [Vitis vinifera]                                              |
| 68            | 20         | gi 225440045 | 274.53 | 54           | 43        | 2       | Carbamidomethylation; Oxidation (M) | 89589     | PREDICTED: cell division cycle protein 48 homolog [Vitis vinifera]                 |
| 10            | 16386      | gi 669100005 | 272.97 | 68           | 36        | 36      | Carbamidomethylation                | 52635     | ribulose biphosphate carboxylase large chain (chloroplast) [Camellia crapnelliana] |
| 56            | 18         | gi 225452767 | 265.15 | 66           | 32        | 3       | Carbamidomethylation; Oxidation (M) | 49622     | PREDICTED: tubulin alpha chain [Vitis vinifera]                                    |
| 3             | 16442      | gi 224056705 | 261.86 | 58           | 24        | 1       | Carbamidomethylation                | 41636     | actin family protein [Populus trichocarpa]                                         |
| 35            | 16         | gi 225440324 | 261.08 | 46           | 33        | 1       | Carbamidomethylation; Oxidation (M) | 71066     | PREDICTED: heat shock cognate 70 kDa protein 2 [Vitis vinifera]                    |
| 6             | 16451      | gi 224112777 | 261.01 | 63           | 23        | 1       | Carbamidomethylation                | 41717     | actin family protein [Populus trichocarpa]                                         |

|     |       |              |        |    |    |   |                                     |        |                                                                          |
|-----|-------|--------------|--------|----|----|---|-------------------------------------|--------|--------------------------------------------------------------------------|
| 70  | 36    | gi 225426230 | 256.33 | 35 | 31 | 1 | Carbamidomethylation                | 73581  | PREDICTED: luminal-binding protein 5 [Vitis vinifera]                    |
| 58  | 19    | gi 731439963 | 255.45 | 66 | 30 | 1 | Carbamidomethylation; Oxidation (M) | 49600  | PREDICTED: tubulin alpha chain-like [Vitis vinifera]                     |
| 78  | 16444 | gi 224094244 | 254.79 | 34 | 33 | 4 | Carbamidomethylation                | 93953  | elongation factor 2 family protein [Populus trichocarpa]                 |
| 158 | 38    | gi 225448483 | 251.53 | 24 | 40 | 1 | Carbamidomethylation                | 192967 | PREDICTED: clathrin heavy chain 1 [Vitis vinifera]                       |
| 105 | 16454 | gi 224133614 | 249.57 | 42 | 32 | 1 | Carbamidomethylation; Oxidation (M) | 90417  | hypothetical protein POPTR_0015s09220g [Populus trichocarpa]             |
| 135 | 16490 | gi 566191652 | 248.39 | 25 | 45 | 2 | Carbamidomethylation                | 193360 | clathrin heavy chain family protein [Populus trichocarpa]                |
| 67  | 16430 | gi 566232573 | 244.12 | 33 | 26 | 1 | Carbamidomethylation                | 85012  | hypothetical protein POPTR_0019s05430g [Populus trichocarpa]             |
| 7   | 16499 | gi 224117708 | 243.92 | 55 | 20 | 1 | Carbamidomethylation                | 40618  | actin family protein [Populus trichocarpa]                               |
| 25  | 34    | gi 225432155 | 240.08 | 62 | 22 | 1 | Carbamidomethylation; Oxidation (M) | 43114  | PREDICTED: S-adenosylmethionine synthase 2 [Vitis vinifera]              |
| 62  | 16455 | gi 566188155 | 238.91 | 31 | 26 | 3 | Carbamidomethylation                | 89855  | hypothetical protein POPTR_0009s15490g [Populus trichocarpa]             |
| 71  | 46    | gi 225445820 | 238.25 | 30 | 22 | 1 | Carbamidomethylation; Oxidation (M) | 71402  | PREDICTED: heat shock 70 kDa protein [Vitis vinifera]                    |
| 28  | 33    | gi 225437708 | 238.19 | 63 | 20 | 1 | Carbamidomethylation; Oxidation (M) | 42793  | PREDICTED: S-adenosylmethionine synthase 5 [Vitis vinifera]              |
| 92  | 39    | gi 225462164 | 236.74 | 35 | 34 | 6 | Carbamidomethylation                | 93979  | PREDICTED: elongation factor 2 [Vitis vinifera]                          |
| 50  | 58    | gi 225449120 | 235.88 | 41 | 24 | 2 | Carbamidomethylation; Oxidation (M) | 49376  | PREDICTED: elongation factor 1-alpha [Vitis vinifera]                    |
| 86  | 70    | gi 359490716 | 235.08 | 30 | 27 | 1 | Carbamidomethylation                | 73489  | PREDICTED: luminal-binding protein 5-like isoform X2 [Vitis vinifera]    |
| 64  | 26    | gi 225456079 | 233.52 | 48 | 22 | 7 | Carbamidomethylation                | 59180  | PREDICTED: ATP synthase subunit beta mitochondrial-like [Vitis vinifera] |

|     |       |              |        |    |    |   |                                     |       |                                                                                                  |
|-----|-------|--------------|--------|----|----|---|-------------------------------------|-------|--------------------------------------------------------------------------------------------------|
| 144 | 17009 | gi 224065861 | 232.61 | 60 | 20 | 7 | Carbamidomethylation                | 18243 | Peptidyl-prolyl cis-trans isomerase family protein [Populus trichocarpa]                         |
| 54  | 31    | gi 225439223 | 231.05 | 35 | 28 | 4 | Carbamidomethylation; Oxidation (M) | 84991 | PREDICTED: 5-methyltetrahydropteroyltriglutamate-homocysteine methyltransferase [Vitis vinifera] |
| 127 | 41    | gi 225456004 | 230.19 | 36 | 24 | 1 | Carbamidomethylation                | 75635 | PREDICTED: stromal 70 kDa heat shock-related protein chloroplastic [Vitis vinifera]              |
| 118 | 16476 | gi 566212215 | 230.07 | 47 | 21 | 2 | Carbamidomethylation; Oxidation (M) | 53198 | adenosylhomocysteinase family protein [Populus trichocarpa]                                      |
| 82  | 44    | gi 359473642 | 229.07 | 30 | 25 | 4 | Carbamidomethylation                | 90465 | PREDICTED: heat shock protein 90-1 [Vitis vinifera]                                              |
| 41  | 64    | gi 731416007 | 227.93 | 54 | 20 | 1 | Carbamidomethylation; Oxidation (M) | 42931 | PREDICTED: S-adenosylmethionine synthase 4 [Vitis vinifera]                                      |
| 111 | 16510 | gi 566146992 | 227.82 | 28 | 19 | 2 | Carbamidomethylation                | 71904 | heat shock protein 70 cognate [Populus trichocarpa]                                              |
| 104 | 16500 | gi 224136806 | 227.25 | 43 | 20 | 5 | Carbamidomethylation                | 47928 | hypothetical protein POPTR_0015s14380g [Populus trichocarpa]                                     |
| 66  | 16494 | gi 566146990 | 223.09 | 28 | 21 | 1 | Carbamidomethylation; Oxidation (M) | 71882 | heat shock protein 70 cognate [Populus trichocarpa]                                              |
| 166 | 16503 | gi 224073124 | 221.5  | 37 | 21 | 3 | Carbamidomethylation                | 64544 | chaperonin precursor family protein [Populus trichocarpa]                                        |
| 59  | 88    | gi 225426414 | 221.07 | 42 | 24 | 1 | Carbamidomethylation                | 50055 | PREDICTED: tubulin beta chain [Vitis vinifera]                                                   |
| 113 | 42    | gi 731393262 | 220.81 | 38 | 26 | 5 | Carbamidomethylation                | 64608 | PREDICTED: ruBisCO large subunit-binding protein subunit beta chloroplastic [Vitis vinifera]     |
| 134 | 63    | gi 225433506 | 220.76 | 44 | 21 | 2 | Carbamidomethylation                | 53181 | PREDICTED: adenosylhomocysteinase [Vitis vinifera]                                               |
| 114 | 16475 | gi 224099437 | 220.54 | 38 | 16 | 1 | Carbamidomethylation                | 59970 | H <sup>+</sup> -transporting two-sector ATPase family protein [Populus trichocarpa]              |
| 189 | 16517 | gi 224097420 | 219.47 | 42 | 22 | 3 | Carbamidomethylation                | 68619 | Vacuolar ATP synthase catalytic subunit A family protein [Populus trichocarpa]                   |



|     |       |              |        |    |    |    |                                        |        |                                                                                                                   |
|-----|-------|--------------|--------|----|----|----|----------------------------------------|--------|-------------------------------------------------------------------------------------------------------------------|
| 155 | 78    | gi 359478916 | 218.87 | 40 | 15 | 4  | Carbamidomethylation;<br>Oxidation (M) | 48674  | PREDICTED: ribulose biphosphate<br>carboxylase/oxygenase activase<br>chloroplastic isoform X2 [Vitis<br>vinifera] |
| 125 | 16508 | gi 224144808 | 216.7  | 51 | 19 | 2  | Carbamidomethylation;<br>Oxidation (M) | 49595  | Tubulin alpha-1 chain family protein<br>[Populus trichocarpa]                                                     |
| 128 | 16602 | gi 224052904 | 216.61 | 44 | 17 | 1  | Carbamidomethylation;<br>Oxidation (M) | 49819  | alpha-tubulin 2 family protein<br>[Populus trichocarpa]                                                           |
| 168 | 66    | gi 225460961 | 215.02 | 23 | 19 | 2  | Carbamidomethylation;<br>Oxidation (M) | 110056 | PREDICTED: aconitate hydratase<br>cytoplasmic [Vitis vinifera]                                                    |
| 115 | 16464 | gi 566199292 | 214.18 | 53 | 18 | 1  | Carbamidomethylation                   | 42361  | hypothetical protein<br>POPTR_0013s03790g [Populus<br>trichocarpa]                                                |
| 136 | 138   | gi 731423140 | 213.98 | 27 | 16 | 1  | Carbamidomethylation                   | 55855  | PREDICTED: enolase [Vitis<br>vinifera]                                                                            |
| 100 | 16511 | gi 566196410 | 213.78 | 28 | 22 | 3  |                                        | 73406  | BiP isoform A family protein<br>[Populus trichocarpa]                                                             |
| 76  | 86    | gi 225439902 | 213.66 | 42 | 20 | 1  | Carbamidomethylation;<br>Oxidation (M) | 49336  | PREDICTED: elongation factor 1-<br>alpha [Vitis vinifera]                                                         |
| 123 | 67    | gi 224365668 | 212.74 | 40 | 23 | 20 | Carbamidomethylation                   | 55143  | ATPase subunit 1 (mitochondrion)<br>[Vitis vinifera]                                                              |
| 206 | 95    | gi 731379116 | 211.81 | 24 | 19 | 7  | Carbamidomethylation                   | 100128 | PREDICTED: puromycin-sensitive<br>aminopeptidase isoform X2 [Vitis<br>vinifera]                                   |
| 216 | 68    | gi 225446609 | 211.5  | 22 | 23 | 2  | Carbamidomethylation                   | 110322 | PREDICTED: phosphoenolpyruvate<br>carboxylase housekeeping isozyme<br>[Vitis vinifera]                            |
| 264 | 97    | gi 225441955 | 211.38 | 53 | 20 | 3  | Carbamidomethylation                   | 47682  | PREDICTED: 26S protease<br>regulatory subunit 7 [Vitis vinifera]                                                  |
| 209 | 16519 | gi 224105937 | 211    | 17 | 31 | 1  | Carbamidomethylation                   | 191356 | hypothetical protein<br>POPTR_0009s07740g [Populus<br>trichocarpa]                                                |
| 152 | 294   | gi 225437549 | 210.63 | 24 | 14 | 1  | Carbamidomethylation                   | 48111  | PREDICTED: calreticulin [Vitis<br>vinifera]                                                                       |
| 244 | 82    | gi 225443399 | 210.33 | 38 | 20 | 1  | Carbamidomethylation                   | 68723  | PREDICTED: V-type proton ATPase<br>catalytic subunit A [Vitis vinifera]                                           |
| 141 | 16518 | gi 566204581 | 210.19 | 24 | 18 | 4  | Carbamidomethylation                   | 82947  | hypothetical protein<br>POPTR_0014s16280g [Populus<br>trichocarpa]                                                |

|     |       |              |        |    |    |    |                      |        |                                                                                                            |
|-----|-------|--------------|--------|----|----|----|----------------------|--------|------------------------------------------------------------------------------------------------------------|
| 52  | 112   | gi 731394274 | 209.72 | 52 | 18 | 1  | Carbamidomethylation | 42738  | PREDICTED: S-adenosylmethionine synthase 1 isoform X2 [Vitis vinifera]                                     |
| 112 | 16496 | gi 224085900 | 208.86 | 23 | 23 | 6  |                      | 94047  | hypothetical protein POPTR_0005s26260g [Populus trichocarpa]                                               |
| 218 | 81    | gi 225461660 | 208.7  | 23 | 25 | 3  | Carbamidomethylation | 109823 | PREDICTED: phosphoenolpyruvate carboxylase housekeeping isozyme [Vitis vinifera]                           |
| 131 | 16498 | gi 224142804 | 208.4  | 43 | 19 | 2  | Carbamidomethylation | 46871  | translation initiation factor eIF-4A family protein [Populus trichocarpa]                                  |
| 238 | 61    | gi 731426977 | 207.44 | 27 | 24 | 6  | Carbamidomethylation | 102347 | PREDICTED: ATP-dependent Clp protease ATP-binding subunit clpA homolog CD4B chloroplastic [Vitis vinifera] |
| 284 | 16513 | gi 566214281 | 206.89 | 52 | 18 | 1  | Carbamidomethylation | 47960  | hypothetical protein POPTR_0018s04900g [Populus trichocarpa]                                               |
| 84  | 252   | gi 526117553 | 205.74 | 35 | 11 | 1  | Carbamidomethylation | 39322  | glutamine synthetase cytosolic isozyme 2 [Vitis vinifera]                                                  |
| 160 | 166   | gi 225433510 | 204.61 | 32 | 14 | 4  | Carbamidomethylation | 51906  | PREDICTED: serine hydroxymethyltransferase 4 [Vitis vinifera]                                              |
| 192 | 92    | gi 359479362 | 204.53 | 34 | 19 | 4  | Carbamidomethylation | 61984  | PREDICTED: ruBisCO large subunit-binding protein subunit alpha [Vitis vinifera]                            |
| 243 | 16468 | gi 542688129 | 204.23 | 53 | 18 | 17 | Carbamidomethylation | 53694  | ATP synthase CF1 beta subunit (chloroplast) [Camellia taliensis]                                           |
| 175 | 116   | gi 731410136 | 204.17 | 20 | 18 | 4  | Carbamidomethylation | 95223  | PREDICTED: heat shock protein 83 isoform X3 [Vitis vinifera]                                               |
| 298 | 141   | gi 731419756 | 204.11 | 40 | 17 | 4  | Carbamidomethylation | 52962  | PREDICTED: UDP-glucose 6-dehydrogenase 1 [Vitis vinifera]                                                  |
| 109 | 94    | gi 225464999 | 203.96 | 41 | 16 | 4  |                      | 42422  | PREDICTED: phosphoglycerate kinase cytosolic [Vitis vinifera]                                              |
| 174 | 128   | gi 225430776 | 203.18 | 31 | 15 | 7  | Carbamidomethylation | 73659  | PREDICTED: succinate dehydrogenase [ubiquinone] flavoprotein subunit mitochondrial [Vitis vinifera]        |
| 198 | 72    | gi 225456880 | 202.41 | 34 | 17 | 5  | Carbamidomethylation | 52692  | PREDICTED: elongation factor TuB chloroplastic [Vitis vinifera]                                            |

|     |       |              |        |    |    |   |                                     |        |                                                                                              |
|-----|-------|--------------|--------|----|----|---|-------------------------------------|--------|----------------------------------------------------------------------------------------------|
| 173 | 85    | gi 225460328 | 201.12 | 26 | 19 | 1 | Carbamidomethylation                | 74178  | PREDICTED: stromal 70 kDa heat shock-related protein chloroplastic-like [Vitis vinifera]     |
| 162 | 74    | gi 731393844 | 200.76 | 22 | 21 | 4 | Carbamidomethylation                | 101855 | PREDICTED: protein argonaute 4 [Vitis vinifera]                                              |
| 251 | 158   | gi 731388277 | 200.56 | 34 | 15 | 3 | Carbamidomethylation                | 58138  | PREDICTED: importin subunit alpha-1 isoform X1 [Vitis vinifera]                              |
| 272 | 16615 | gi 224078391 | 200.39 | 38 | 14 | 2 | Carbamidomethylation                | 54253  | vacuolar ATP synthase subunit B family protein [Populus trichocarpa]                         |
| 233 | 89    | gi 731402464 | 200.28 | 22 | 16 | 5 | Carbamidomethylation                | 93319  | PREDICTED: heat shock 70 kDa protein 14-like [Vitis vinifera]                                |
| 241 | 16563 | gi 566206349 | 199.41 | 46 | 17 | 1 | Carbamidomethylation                | 40931  | REVERSIBLY GLYCOSYLATED POLYPEPTIDE 3 family protein [Populus trichocarpa]                   |
| 368 | 111   | gi 225432252 | 199.34 | 46 | 15 | 1 | Carbamidomethylation                | 47374  | PREDICTED: 26S protease regulatory subunit 6A homolog [Vitis vinifera]                       |
| 65  | 16520 | gi 224109716 | 199.06 | 33 | 18 | 1 | Carbamidomethylation                | 49434  | hypothetical protein POPTR_0010s22620g [Populus trichocarpa]                                 |
| 225 | 139   | gi 225468576 | 199.05 | 22 | 17 | 3 | Carbamidomethylation; Oxidation (M) | 98187  | PREDICTED: aconitate hydratase 1 [Vitis vinifera]                                            |
| 53  | 16553 | gi 224133862 | 198.68 | 41 | 15 | 1 | Carbamidomethylation                | 36770  | glyceraldehyde-3-phosphate dehydrogenase family protein [Populus trichocarpa]                |
| 473 | 16658 | gi 224125162 | 198.54 | 48 | 14 | 1 | Carbamidomethylation                | 47544  | 26S proteasome AAA-ATPase subunit family protein [Populus trichocarpa]                       |
| 148 | 87    | gi 731407424 | 198.47 | 20 | 17 | 1 | Carbamidomethylation                | 91983  | PREDICTED: uncharacterized protein LOC100244028 [Vitis vinifera]                             |
| 234 | 16672 | gi 566203657 | 197.88 | 22 | 11 | 6 | Carbamidomethylation                | 56866  | hypothetical protein POPTR_0014s10800g [Populus trichocarpa]                                 |
| 121 | 145   | gi 225464995 | 197.54 | 33 | 15 | 2 |                                     | 50083  | PREDICTED: phosphoglycerate kinase chloroplastic [Vitis vinifera]                            |
| 194 | 130   | gi 731402352 | 197.38 | 29 | 19 | 4 | Carbamidomethylation                | 65010  | PREDICTED: ruBisCO large subunit-binding protein subunit beta chloroplastic [Vitis vinifera] |

|     |       |              |        |    |    |   |                                     |        |                                                                                                    |
|-----|-------|--------------|--------|----|----|---|-------------------------------------|--------|----------------------------------------------------------------------------------------------------|
| 215 | 115   | gi 225447278 | 197.36 | 19 | 16 | 1 | Carbamidomethylation                | 107431 | PREDICTED: aconitate hydratase cytoplasmic [Vitis vinifera]                                        |
| 129 | 16607 | gi 224109060 | 196.42 | 37 | 15 | 2 |                                     | 50212  | PHOSPHOGLYCERATE KINASE 1 family protein [Populus trichocarpa]                                     |
| 149 | 83    | gi 225430261 | 195.59 | 45 | 18 | 2 | Carbamidomethylation                | 48395  | PREDICTED: DEAD-box ATP-dependent RNA helicase 56 [Vitis vinifera]                                 |
| 119 | 16541 | gi 566192207 | 195.14 | 38 | 19 | 1 | Carbamidomethylation                | 49434  | hypothetical protein POPTR_0010s22560g [Populus trichocarpa]                                       |
| 193 | 16612 | gi 566182577 | 195.11 | 32 | 12 | 4 | Carbamidomethylation; Oxidation (M) | 48316  | hypothetical protein POPTR_0008s05870g [Populus trichocarpa]                                       |
| 85  | 160   | gi 359491599 | 194.8  | 47 | 16 | 2 | Carbamidomethylation                | 36735  | PREDICTED: glyceraldehyde-3-phosphate dehydrogenase cytosolic [Vitis vinifera]                     |
| 307 | 345   | gi 731427869 | 193.68 | 35 | 13 | 1 | Carbamidomethylation                | 54279  | PREDICTED: V-type proton ATPase subunit B 2 isoform X2 [Vitis vinifera]                            |
| 207 | 16528 | gi 224104681 | 193.14 | 30 | 20 | 3 |                                     | 61991  | RUBISCO SUBUNIT BINDING-protein ALPHA SUBUNIT [Populus trichocarpa]                                |
| 101 | 102   | gi 731393868 | 192.96 | 21 | 17 | 2 | Carbamidomethylation                | 89385  | PREDICTED: 5-methyltetrahydropteroyltriglutamate-homocysteine methyltransferase 2 [Vitis vinifera] |
| 342 | 16799 | gi 224097588 | 192.94 | 29 | 13 | 1 | Carbamidomethylation                | 46583  | DnaJ family protein [Populus trichocarpa]                                                          |
| 147 | 203   | gi 526117485 | 192.6  | 34 | 11 | 9 | Carbamidomethylation                | 40813  | naringenin 2-oxoglutarate 3-dioxygenase [Vitis vinifera]                                           |
| 416 | 16685 | gi 224074966 | 192.46 | 17 | 13 | 1 | Carbamidomethylation                | 106321 | peptidase M1 family protein [Populus trichocarpa]                                                  |
| 288 | 16584 | gi 224136316 | 191.8  | 21 | 17 | 1 | Carbamidomethylation                | 103518 | ATP-dependent clp protease ATP-binding subunit clpA family protein [Populus trichocarpa]           |
| 182 | 16575 | gi 224063263 | 190.95 | 36 | 19 | 1 | Carbamidomethylation                | 58692  | 2-dehydro-3-deoxyphosphoheptonate aldolase family protein [Populus trichocarpa]                    |

|     |       |              |        |    |    |    |                                     |        |                                                                                   |
|-----|-------|--------------|--------|----|----|----|-------------------------------------|--------|-----------------------------------------------------------------------------------|
| 387 | 154   | gi 225430151 | 190.84 | 50 | 16 | 3  | Carbamidomethylation                | 47221  | PREDICTED: 26S protease regulatory subunit 8 homolog A [Vitis vinifera]           |
| 235 | 16531 | gi 566170554 | 190.79 | 28 | 12 | 1  | Carbamidomethylation                | 56700  | hypothetical protein POPTR_0005s10340g [Populus trichocarpa]                      |
| 183 | 16787 | gi 224102193 | 190.73 | 36 | 13 | 3  | Carbamidomethylation; Oxidation (M) | 35716  | cytosolic malate dehydrogenase family protein [Populus trichocarpa]               |
| 191 | 16609 | gi 224053971 | 190.31 | 33 | 15 | 2  | Carbamidomethylation                | 52743  | hypothetical protein POPTR_0001s08770g [Populus trichocarpa]                      |
| 133 | 100   | gi 225457939 | 190.3  | 22 | 21 | 4  | Carbamidomethylation                | 93220  | PREDICTED: endoplasmic homolog [Vitis vinifera]                                   |
| 176 | 122   | gi 731430736 | 189.94 | 34 | 15 | 1  | Carbamidomethylation                | 44590  | PREDICTED: 60S ribosomal protein L3 [Vitis vinifera]                              |
| 475 | 107   | gi 225452950 | 189.87 | 22 | 17 | 12 |                                     | 109834 | PREDICTED: chaperone protein ClpB3 chloroplastic [Vitis vinifera]                 |
| 201 | 16506 | gi 224065685 | 188.63 | 32 | 15 | 1  | Carbamidomethylation                | 56639  | catalase family protein [Populus trichocarpa]                                     |
| 385 | 206   | gi 731385022 | 188.57 | 17 | 13 | 7  | Carbamidomethylation                | 114759 | PREDICTED: glycine dehydrogenase (decarboxylating) mitochondrial [Vitis vinifera] |
| 210 | 16678 | gi 566192863 | 188.41 | 33 | 13 | 3  | Carbamidomethylation                | 57068  | hypothetical protein POPTR_0010s26150g [Populus trichocarpa]                      |
| 159 | 16526 | gi 224063766 | 188.37 | 23 | 15 | 3  | Carbamidomethylation                | 80716  | transketolase family protein [Populus trichocarpa]                                |
| 380 | 137   | gi 526117707 | 188.23 | 43 | 15 | 8  | Carbamidomethylation                | 53695  | uncharacterized protein LOC100261274 [Vitis vinifera]                             |
| 186 | 16572 | gi 566204141 | 188.07 | 39 | 16 | 4  | Carbamidomethylation                | 42935  | hypothetical protein POPTR_0014s13660g [Populus trichocarpa]                      |
| 442 | 16579 | gi 224133400 | 187.95 | 13 | 14 | 1  | Carbamidomethylation                | 136521 | coatamer alpha subunit-like family protein [Populus trichocarpa]                  |
| 187 | 16604 | gi 566150406 | 187.94 | 18 | 17 | 1  | Carbamidomethylation                | 101827 | Argonaute 4 family protein [Populus trichocarpa]                                  |
| 130 | 16585 | gi 224099261 | 187.73 | 21 | 21 | 3  | Carbamidomethylation                | 90156  | heat shock family protein [Populus trichocarpa]                                   |

|     |       |              |        |    |    |   |                                     |        |                                                                                   |
|-----|-------|--------------|--------|----|----|---|-------------------------------------|--------|-----------------------------------------------------------------------------------|
| 278 | 93    | gi 359496771 | 187.48 | 28 | 15 | 3 |                                     | 73271  | PREDICTED: heat shock 70 kDa protein mitochondrial-like [Vitis vinifera]          |
| 293 | 123   | gi 731391766 | 187.47 | 22 | 21 | 3 | Carbamidomethylation                | 127035 | PREDICTED: ubiquitin-activating enzyme E1 1 [Vitis vinifera]                      |
| 200 | 146   | gi 731418890 | 187.36 | 32 | 13 | 1 | Carbamidomethylation; Oxidation (M) | 52944  | PREDICTED: elongation factor Tu chloroplastic-like [Vitis vinifera]               |
| 277 | 16537 | gi 566148864 | 187.16 | 31 | 15 | 1 |                                     | 60991  | Chaperonin CPN60-2 family protein [Populus trichocarpa]                           |
| 161 | 110   | gi 359490179 | 186.94 | 23 | 15 | 3 | Carbamidomethylation                | 78856  | PREDICTED: transketolase chloroplastic [Vitis vinifera]                           |
| 418 | 136   | gi 225456274 | 186.93 | 31 | 15 | 5 | Carbamidomethylation                | 55180  | PREDICTED: argininosuccinate synthase chloroplastic [Vitis vinifera]              |
| 181 | 127   | gi 731411443 | 186.61 | 31 | 14 | 1 | Carbamidomethylation                | 44506  | PREDICTED: 60S ribosomal protein L3-2 isoform X1 [Vitis vinifera]                 |
| 103 | 16693 | gi 566209405 | 186.43 | 33 | 13 | 1 | Carbamidomethylation                | 44445  | hypothetical protein POPTR_0016s08780g [Populus trichocarpa]                      |
| 376 | 248   | gi 225433375 | 185.65 | 27 | 13 | 2 | Carbamidomethylation                | 61370  | PREDICTED: chaperonin CPN60-2 mitochondrial [Vitis vinifera]                      |
| 252 | 132   | gi 731428778 | 185.56 | 31 | 15 | 2 | Carbamidomethylation                | 56891  | PREDICTED: serine hydroxymethyltransferase mitochondrial [Vitis vinifera]         |
| 421 | 444   | gi 225437777 | 185.52 | 17 | 9  | 4 | Carbamidomethylation                | 58724  | PREDICTED: putative proline--tRNA ligase C19C7.06 [Vitis vinifera]                |
| 463 | 156   | gi 225441236 | 185.5  | 11 | 13 | 4 | Carbamidomethylation                | 177678 | PREDICTED: ferredoxin-dependent glutamate synthase chloroplastic [Vitis vinifera] |
| 126 | 143   | gi 731415862 | 185.48 | 38 | 16 | 6 | Carbamidomethylation                | 49362  | PREDICTED: calreticulin [Vitis vinifera]                                          |
| 248 | 101   | gi 225429228 | 185.04 | 23 | 13 | 2 |                                     | 72770  | PREDICTED: heat shock 70 kDa protein mitochondrial [Vitis vinifera]               |
| 212 | 16545 | gi 566168009 | 184.99 | 25 | 17 | 1 |                                     | 62041  | RUBISCO SUBUNIT BINDING-protein ALPHA SUBUNIT [Populus trichocarpa]               |

|     |       |              |        |    |    |   |                                     |        |                                                                                                    |
|-----|-------|--------------|--------|----|----|---|-------------------------------------|--------|----------------------------------------------------------------------------------------------------|
| 265 | 187   | gi 225457674 | 184.94 | 24 | 13 | 4 | Carbamidomethylation                | 67344  | PREDICTED: pyrophosphate--fructose 6-phosphate 1-phosphotransferase subunit alpha [Vitis vinifera] |
| 464 | 172   | gi 225442805 | 184.76 | 44 | 14 | 1 | Carbamidomethylation                | 47100  | PREDICTED: 26S protease regulatory subunit 8 homolog A [Vitis vinifera]                            |
| 321 | 109   | gi 731424802 | 184.3  | 17 | 13 | 4 | Carbamidomethylation                | 101244 | PREDICTED: heat shock protein 101 isoform X1 [Vitis vinifera]                                      |
| 405 | 16771 | gi 566148111 | 184    | 17 | 13 | 1 | Carbamidomethylation                | 103436 | peptidase M1 family protein [Populus trichocarpa]                                                  |
| 319 | 16826 | gi 224094759 | 183.95 | 22 | 9  | 1 | Carbamidomethylation                | 69860  | Succinate dehydrogenase flavoprotein subunit [Populus trichocarpa]                                 |
| 333 | 16639 | gi 224086120 | 183.11 | 22 | 11 | 1 | Carbamidomethylation                | 67209  | pyrophosphate-dependent phosphofructokinase alpha subunit family protein [Populus trichocarpa]     |
| 394 | 200   | gi 225427768 | 183.03 | 35 | 12 | 4 | Carbamidomethylation                | 42948  | PREDICTED: fructose-bisphosphate aldolase 1 chloroplastic [Vitis vinifera]                         |
| 282 | 17072 | gi 224114557 | 182.62 | 20 | 8  | 2 | Carbamidomethylation                | 35588  | Malate dehydrogenase family protein [Populus trichocarpa]                                          |
| 228 | 16574 | gi 224058852 | 182.58 | 18 | 15 | 4 | Carbamidomethylation                | 94161  | heat shock protein 70 [Populus trichocarpa]                                                        |
| 357 | 161   | gi 731388175 | 182.2  | 29 | 14 | 3 | Carbamidomethylation                | 65990  | PREDICTED: ATP-citrate synthase beta chain protein 2 [Vitis vinifera]                              |
| 258 | 16544 | gi 566173508 | 181.83 | 32 | 13 | 3 | Carbamidomethylation; Oxidation (M) | 56756  | catalase family protein [Populus trichocarpa]                                                      |
| 410 | 16576 | gi 224119200 | 181.75 | 14 | 15 | 3 | Carbamidomethylation                | 136903 | coatamer alpha subunit-like family protein [Populus trichocarpa]                                   |
| 297 | 16663 | gi 566170698 | 181.16 | 17 | 12 | 1 | Carbamidomethylation                | 98215  | aconitate hydratase family protein [Populus trichocarpa]                                           |
| 137 | 16871 | gi 566205887 | 181.09 | 34 | 12 | 1 | Carbamidomethylation; Oxidation (M) | 38451  | glutamine synthetase family protein [Populus trichocarpa]                                          |
| 312 | 16665 | gi 224087339 | 181.07 | 32 | 13 | 3 |                                     | 57707  | biotin carboxylase precursor family protein [Populus trichocarpa]                                  |
| 199 | 16705 | gi 566210462 | 180.75 | 19 | 11 | 2 | Carbamidomethylation                | 67453  | Methylenetetrahydrofolate reductase family protein [Populus trichocarpa]                           |
| 89  | 16804 | gi 224053300 | 180.53 | 69 | 13 | 4 | Carbamidomethylation                | 17702  | ubiquitin/ribosomal protein 27a [Populus trichocarpa]                                              |

|     |       |              |        |    |    |    |                                        |        |                                                                                                  |
|-----|-------|--------------|--------|----|----|----|----------------------------------------|--------|--------------------------------------------------------------------------------------------------|
| 73  | 168   | gi 359482256 | 179.66 | 47 | 15 | 1  | Carbamidomethylation;<br>Oxidation (M) | 42618  | PREDICTED: S-adenosylmethionine<br>synthase 3 [Vitis vinifera]                                   |
| 302 | 163   | gi 225456339 | 179.32 | 32 | 12 | 1  | Carbamidomethylation                   | 41981  | PREDICTED: UDP-arabinopyranose<br>mutase 1 isoform X2 [Vitis vinifera]                           |
| 462 | 189   | gi 731428324 | 179.26 | 8  | 15 | 3  | Carbamidomethylation                   | 252296 | PREDICTED: acetyl-CoA<br>carboxylase 1-like [Vitis vinifera]                                     |
| 308 | 241   | gi 731413130 | 179.23 | 17 | 13 | 4  | Oxidation (M)                          | 116111 | PREDICTED: 2-oxoglutarate<br>dehydrogenase mitochondrial [Vitis<br>vinifera]                     |
| 96  | 159   | gi 225462777 | 179.21 | 34 | 13 | 2  | Carbamidomethylation                   | 42597  | PREDICTED: chalcone synthase 2<br>[Vitis vinifera]                                               |
| 327 | 16560 | gi 566206267 | 178.47 | 15 | 13 | 4  | Carbamidomethylation                   | 100324 | hypothetical protein<br>POPTR_0015s06760g [Populus<br>trichocarpa]                               |
| 454 | 239   | gi 225458111 | 178.35 | 11 | 13 | 4  | Carbamidomethylation                   | 136997 | PREDICTED: coatomer subunit<br>alpha-1 [Vitis vinifera]                                          |
| 88  | 186   | gi 526117870 | 178.32 | 35 | 13 | 1  | Carbamidomethylation                   | 42744  | chalcone synthase [Vitis vinifera]                                                               |
| 372 | 16674 | gi 542688125 | 178.25 | 21 | 11 | 11 |                                        | 56099  | photosystem II p680 chlorophyll A<br>apoprotein CP-47 (chloroplast)<br>[Camellia taliensis]      |
| 570 | 231   | gi 225450275 | 178.24 | 45 | 10 | 8  | Carbamidomethylation                   | 35771  | PREDICTED: serine/threonine-<br>protein phosphatase PP2A-2<br>catalytic subunit [Vitis vinifera] |
| 324 | 317   | gi 225441799 | 178.09 | 35 | 12 | 3  | Carbamidomethylation                   | 29974  | PREDICTED: 40S ribosomal protein<br>S2-3 [Vitis vinifera]                                        |
| 581 | 135   | gi 731402494 | 177.6  | 17 | 13 | 2  | Carbamidomethylation                   | 102377 | PREDICTED: coatomer subunit<br>beta'-1 [Vitis vinifera]                                          |
| 381 | 16712 | gi 224100783 | 177.48 | 18 | 12 | 3  | Carbamidomethylation                   | 77598  | phenylalanine ammonia-lyase family<br>protein [Populus trichocarpa]                              |
| 379 | 16552 | gi 224101561 | 177.22 | 27 | 15 | 4  | Carbamidomethylation                   | 65798  | subunit B of the trimeric enzyme<br>ATP Citrate lyase family protein<br>[Populus trichocarpa]    |
| 745 | 17442 | gi 566152994 | 177.18 | 24 | 11 | 2  | Carbamidomethylation                   | 57135  | hypothetical protein<br>POPTR_0001s35790g [Populus<br>trichocarpa]                               |
| 306 | 16573 | gi 566151627 | 176.7  | 22 | 13 | 2  |                                        | 73210  | heat shock protein 70 [Populus<br>trichocarpa]                                                   |



|     |       |              |        |    |    |    |                      |        |                                                                                      |
|-----|-------|--------------|--------|----|----|----|----------------------|--------|--------------------------------------------------------------------------------------|
| 205 | 16583 | gi 224079726 | 176.43 | 32 | 14 | 4  | Carbamidomethylation | 46428  | isocitrate dehydrogenase family protein [Populus trichocarpa]                        |
| 420 | 16601 | gi 224069951 | 176.26 | 23 | 11 | 1  | Carbamidomethylation | 61124  | Chaperonin CPN60-2 family protein [Populus trichocarpa]                              |
| 337 | 371   | gi 225457957 | 176.14 | 44 | 11 | 1  | Carbamidomethylation | 17938  | PREDICTED: peptidyl-prolyl cis-trans isomerase [Vitis vinifera]                      |
| 260 | 16775 | gi 566198898 | 175.74 | 15 | 12 | 1  |                      | 73464  | heat shock protein 70 cognate [Populus trichocarpa]                                  |
| 203 | 353   | gi 359483839 | 175.68 | 49 | 9  | 1  | Carbamidomethylation | 27890  | PREDICTED: chlorophyll a-b binding protein of LHCII type 1 [Vitis vinifera]          |
| 280 | 16605 | gi 224141947 | 175.53 | 29 | 12 | 1  | Carbamidomethylation | 53416  | hypothetical protein POPTR_0018s02400g [Populus trichocarpa]                         |
| 296 | 238   | gi 359481634 | 175.49 | 72 | 11 | 5  | Carbamidomethylation | 16594  | PREDICTED: ubiquitin-conjugating enzyme E2 variant 1D [Vitis vinifera]               |
| 599 | 362   | gi 225464186 | 175.49 | 32 | 10 | 10 | Carbamidomethylation | 49585  | PREDICTED: 26S proteasome regulatory subunit 4 homolog B [Vitis vinifera]            |
| 564 | 16895 | gi 566191895 | 175.23 | 12 | 13 | 4  | Carbamidomethylation | 154710 | phosphoribosylformylglycinamide synthase family protein [Populus trichocarpa]        |
| 408 | 16953 | gi 224105301 | 175.23 | 32 | 10 | 1  | Carbamidomethylation | 42832  | latex plastidic aldolase-like family protein [Populus trichocarpa]                   |
| 481 | 16713 | gi 566213382 | 175.13 | 26 | 11 | 1  | Carbamidomethylation | 53743  | phosphogluconate dehydrogenase family protein [Populus trichocarpa]                  |
| 211 | 16939 | gi 224109788 | 175.08 | 28 | 9  | 2  | Carbamidomethylation | 37547  | putative adenosine kinase family protein [Populus trichocarpa]                       |
| 349 | 16779 | gi 566175799 | 175.06 | 34 | 15 | 3  | Carbamidomethylation | 57465  | pyruvate kinase family protein [Populus trichocarpa]                                 |
| 317 | 16610 | gi 566159486 | 175.02 | 15 | 18 | 2  | Carbamidomethylation | 113839 | hypothetical protein POPTR_0002s22720g [Populus trichocarpa]                         |
| 415 | 155   | gi 225446449 | 174.66 | 15 | 10 | 2  | Carbamidomethylation | 97503  | PREDICTED: 26S proteasome non-ATPase regulatory subunit 2 homolog A [Vitis vinifera] |
| 341 | 221   | gi 225445664 | 174.41 | 27 | 12 | 2  |                      | 57338  | PREDICTED: biotin carboxylase 1 chloroplastic [Vitis vinifera]                       |

|     |       |              |        |    |    |    |                                     |        |                                                                                        |
|-----|-------|--------------|--------|----|----|----|-------------------------------------|--------|----------------------------------------------------------------------------------------|
| 208 | 295   | gi 359480275 | 174.39 | 33 | 11 | 1  | Oxidation (M)                       | 35505  | PREDICTED: malate dehydrogenase cytoplasmic [Vitis vinifera]                           |
| 270 | 16808 | gi 566149378 | 174.23 | 28 | 10 | 3  | Carbamidomethylation                | 34116  | hypothetical protein POPTR_0001s16430g [Populus trichocarpa]                           |
| 227 | 338   | gi 225427917 | 173.92 | 31 | 13 | 3  | Carbamidomethylation                | 34675  | PREDICTED: triosephosphate isomerase chloroplastic [Vitis vinifera]                    |
| 440 | 16898 | gi 224116086 | 173.8  | 31 | 8  | 2  | Carbamidomethylation                | 37284  | hypothetical protein POPTR_0011s00500g [Populus trichocarpa]                           |
| 188 | 16723 | gi 224141865 | 173.33 | 46 | 10 | 10 | Carbamidomethylation                | 25015  | GTP-binding family protein [Populus trichocarpa]                                       |
| 423 | 16872 | gi 566170807 | 173.28 | 31 | 13 | 1  | Carbamidomethylation                | 40534  | Chain A family protein [Populus trichocarpa]                                           |
| 184 | 494   | gi 225449541 | 172.88 | 39 | 9  | 2  | Carbamidomethylation                | 27128  | PREDICTED: triosephosphate isomerase cytosolic [Vitis vinifera]                        |
| 633 | 16786 | gi 566208504 | 172.48 | 14 | 12 | 2  | Carbamidomethylation; Oxidation (M) | 128539 | hypothetical protein POPTR_0016s03630g [Populus trichocarpa]                           |
| 543 | 17029 | gi 566210440 | 172.15 | 29 | 12 | 1  | Carbamidomethylation                | 49767  | GDP dissociation inhibitor family protein [Populus trichocarpa]                        |
| 301 | 211   | gi 225423507 | 172.05 | 32 | 15 | 1  | Carbamidomethylation                | 52744  | PREDICTED: UDP-glucose 6-dehydrogenase 3 [Vitis vinifera]                              |
| 593 | 500   | gi 225440011 | 171.92 | 15 | 9  | 1  |                                     | 77480  | PREDICTED: phenylalanine ammonia-lyase [Vitis vinifera]                                |
| 143 | 217   | gi 225437428 | 171.91 | 16 | 14 | 2  | Carbamidomethylation                | 92483  | PREDICTED: sucrose synthase 2 [Vitis vinifera]                                         |
| 530 | 563   | gi 731376167 | 171.78 | 38 | 8  | 3  | Carbamidomethylation                | 29267  | PREDICTED: proteasome subunit beta type-5 [Vitis vinifera]                             |
| 444 | 625   | gi 225431122 | 171.59 | 31 | 14 | 1  | Carbamidomethylation                | 40534  | PREDICTED: ferredoxin--NADP reductase leaf-type isozyme chloroplastic [Vitis vinifera] |
| 377 | 177   | gi 731398850 | 170.98 | 13 | 13 | 2  | Carbamidomethylation                | 113970 | PREDICTED: ubiquitin-activating enzyme E1 1-like isoform X2 [Vitis vinifera]           |
| 329 | 171   | gi 225441044 | 170.97 | 31 | 14 | 2  | Carbamidomethylation                | 57520  | PREDICTED: pyruvate kinase cytosolic isozyme-like [Vitis vinifera]                     |

|     |       |              |        |    |    |   |                      |        |                                                                                       |
|-----|-------|--------------|--------|----|----|---|----------------------|--------|---------------------------------------------------------------------------------------|
| 223 | 16920 | gi 566167040 | 170.75 | 27 | 10 | 1 | Carbamidomethylation | 33502  | hypothetical protein POPTR_0004s17530g [Populus trichocarpa]                          |
| 335 | 218   | gi 731395250 | 170.2  | 26 | 9  | 2 | Carbamidomethylation | 48931  | PREDICTED: elongation factor Tu mitochondrial [Vitis vinifera]                        |
| 434 | 17244 | gi 224113389 | 170.1  | 25 | 11 | 1 |                      | 46762  | DnaJ family protein [Populus trichocarpa]                                             |
| 446 | 17030 | gi 566150460 | 170.08 | 54 | 9  | 9 | Carbamidomethylation | 16862  | calmodulin-like protein 6a [Populus trichocarpa]                                      |
| 110 | 467   | gi 225439749 | 170.01 | 50 | 9  | 4 |                      | 15764  | PREDICTED: histone H2A [Vitis vinifera]                                               |
| 865 | 17701 | gi 566176059 | 169.88 | 22 | 9  | 1 | Carbamidomethylation | 57207  | hypothetical protein POPTR_0006s13050g [Populus trichocarpa]                          |
| 585 | 455   | gi 225434259 | 169.55 | 25 | 11 | 1 | Carbamidomethylation | 49810  | PREDICTED: guanosine nucleotide diphosphate dissociation inhibitor 2 [Vitis vinifera] |
| 399 | 16671 | gi 224077754 | 169.33 | 38 | 14 | 1 | Carbamidomethylation | 41253  | type IIIa membrane protein cp-wap13 [Populus trichocarpa]                             |
| 518 | 286   | gi 731412519 | 169.03 | 16 | 9  | 1 | Carbamidomethylation | 78831  | PREDICTED: phenylalanine ammonia-lyase G1 [Vitis vinifera]                            |
| 224 | 440   | gi 225461156 | 168.41 | 61 | 9  | 3 |                      | 13980  | PREDICTED: probable histone H2A.2 [Vitis vinifera]                                    |
| 339 | 257   | gi 225466253 | 168.21 | 31 | 12 | 2 | Carbamidomethylation | 46284  | PREDICTED: isocitrate dehydrogenase [NADP] [Vitis vinifera]                           |
| 432 | 16781 | gi 566165396 | 168.15 | 21 | 9  | 2 | Carbamidomethylation | 51757  | hypothetical protein POPTR_0004s07280g [Populus trichocarpa]                          |
| 489 | 17168 | gi 224090159 | 167.78 | 15 | 16 | 2 |                      | 151232 | magnesium chelatase subunit family protein [Populus trichocarpa]                      |
| 553 | 16721 | gi 566157090 | 167.26 | 7  | 13 | 1 | Carbamidomethylation | 252616 | hypothetical protein POPTR_0002s09330g [Populus trichocarpa]                          |
| 747 | 16730 | gi 566149642 | 167.16 | 14 | 11 | 1 | Carbamidomethylation | 103496 | hypothetical protein POPTR_0001s17940g [Populus trichocarpa]                          |
| 469 | 17186 | gi 224122082 | 167.13 | 25 | 10 | 2 | Carbamidomethylation | 40896  | type IIIa membrane protein cp-wap13 [Populus trichocarpa]                             |

|     |       |              |        |    |    |    |                                     |        |                                                                          |
|-----|-------|--------------|--------|----|----|----|-------------------------------------|--------|--------------------------------------------------------------------------|
| 291 | 228   | gi 225451995 | 166.51 | 47 | 12 | 2  |                                     | 29540  | PREDICTED: 14-3-3-like protein A [Vitis vinifera]                        |
| 436 | 585   | gi 225444377 | 166.25 | 29 | 7  | 1  | Carbamidomethylation                | 38105  | PREDICTED: thiamine thiazole synthase 2 chloroplastic [Vitis vinifera]   |
| 447 | 844   | gi 526117645 | 166.25 | 14 | 16 | 2  |                                     | 153182 | magnesium chelatase H subunit [Vitis vinifera]                           |
| 396 | 374   | gi 225426162 | 165.68 | 43 | 9  | 2  | Carbamidomethylation                | 20013  | PREDICTED: 40S ribosomal protein S10 [Vitis vinifera]                    |
| 97  | 16660 | gi 566163210 | 165.47 | 28 | 12 | 1  | Carbamidomethylation                | 42709  | naregenin-chalcone synthase family protein [Populus trichocarpa]         |
| 285 | 560   | gi 225468027 | 165.42 | 44 | 7  | 1  | Carbamidomethylation                | 17468  | PREDICTED: eukaryotic translation initiation factor 5A [Vitis vinifera]  |
| 448 | 16833 | gi 566186876 | 164.84 | 13 | 12 | 1  | Carbamidomethylation                | 122028 | hypothetical protein POPTR_0009s07950g partial [Populus trichocarpa]     |
| 422 | 173   | gi 225451806 | 164.71 | 36 | 13 | 1  | Carbamidomethylation                | 40505  | PREDICTED: UDP-arabinopyranose mutase 3 [Vitis vinifera]                 |
| 505 | 209   | gi 731408286 | 164.66 | 25 | 11 | 11 | Carbamidomethylation                | 53389  | PREDICTED: xylose isomerase [Vitis vinifera]                             |
| 429 | 16962 | gi 224128376 | 164.52 | 22 | 9  | 1  | Carbamidomethylation                | 39401  | thioredoxin family protein [Populus trichocarpa]                         |
| 859 | 431   | gi 731391105 | 164.23 | 25 | 8  | 4  | Carbamidomethylation                | 49499  | PREDICTED: calreticulin-3-like [Vitis vinifera]                          |
| 388 | 367   | gi 225444472 | 164.21 | 20 | 9  | 4  | Carbamidomethylation                | 44306  | PREDICTED: aminomethyltransferase mitochondrial [Vitis vinifera]         |
| 647 | 17023 | gi 566202051 | 164.14 | 15 | 7  | 1  | Carbamidomethylation                | 71118  | hypothetical protein POPTR_0014s02550g [Populus trichocarpa]             |
| 449 | 16824 | gi 566159427 | 163.51 | 25 | 11 | 1  | Carbamidomethylation                | 49034  | Elongation factor Tu family protein [Populus trichocarpa]                |
| 220 | 198   | gi 731406211 | 163.38 | 14 | 12 | 4  | Carbamidomethylation                | 92443  | PREDICTED: sucrose synthase [Vitis vinifera]                             |
| 441 | 17021 | gi 224083020 | 163.22 | 48 | 10 | 2  | Carbamidomethylation; Oxidation (M) | 18138  | Peptidyl-prolyl cis-trans isomerase family protein [Populus trichocarpa] |
| 998 | 17690 | gi 224053869 | 163.02 | 16 | 10 | 2  | Carbamidomethylation                | 100242 | hypothetical protein POPTR_0001s09660g [Populus trichocarpa]             |

|     |       |              |        |    |    |    |                      |        |                                                                                     |
|-----|-------|--------------|--------|----|----|----|----------------------|--------|-------------------------------------------------------------------------------------|
| 604 | 583   | gi 225435357 | 162.83 | 15 | 10 | 2  |                      | 77966  | PREDICTED: phenylalanine ammonia-lyase [Vitis vinifera]                             |
| 700 | 411   | gi 359497202 | 162.78 | 23 | 10 | 3  | Carbamidomethylation | 60614  | PREDICTED: T-complex protein 1 subunit eta [Vitis vinifera]                         |
| 625 | 292   | gi 225439231 | 162.3  | 27 | 11 | 11 | Carbamidomethylation | 55389  | PREDICTED: 3-isopropylmalate dehydratase large subunit-like [Vitis vinifera]        |
| 171 | 308   | gi 731392297 | 162.27 | 28 | 14 | 13 | Oxidation (M)        | 31832  | PREDICTED: histone H2B-like [Vitis vinifera]                                        |
| 443 | 319   | gi 359478860 | 162.22 | 45 | 14 | 13 | Carbamidomethylation | 47055  | PREDICTED: 26S protease regulatory subunit 6B homolog [Vitis vinifera]              |
| 348 | 16670 | gi 224073851 | 161.89 | 14 | 11 | 1  | Carbamidomethylation | 94625  | heat shock protein 70 [Populus trichocarpa]                                         |
| 555 | 16755 | gi 566211390 | 161.56 | 13 | 8  | 1  | Carbamidomethylation | 97445  | hypothetical protein POPTR_0017s04660g [Populus trichocarpa]                        |
| 662 | 16907 | gi 566174304 | 161.43 | 9  | 11 | 1  | Carbamidomethylation | 177274 | ferredoxin-dependent glutamate synthase family protein [Populus trichocarpa]        |
| 397 | 192   | gi 225434712 | 161.16 | 37 | 9  | 4  | Carbamidomethylation | 29576  | PREDICTED: proliferating cell nuclear antigen [Vitis vinifera]                      |
| 435 | 16703 | gi 224063273 | 161.11 | 45 | 12 | 2  |                      | 29380  | 14-3-3 protein 32kDa endonuclease [Populus trichocarpa]                             |
| 720 | 16798 | gi 566149322 | 160.94 | 13 | 10 | 4  | Carbamidomethylation | 105097 | putative plasma membrane H <sup>+</sup> ATPase family protein [Populus trichocarpa] |
| 362 | 254   | gi 225430619 | 160.84 | 37 | 10 | 10 | Carbamidomethylation | 22781  | PREDICTED: 40S ribosomal protein S5 [Vitis vinifera]                                |
| 165 | 16968 | gi 566210965 | 160.79 | 33 | 11 | 2  | Carbamidomethylation | 39217  | glutamate-ammonia ligase family protein [Populus trichocarpa]                       |
| 197 | 16754 | gi 566176273 | 160.74 | 12 | 13 | 5  | Carbamidomethylation | 92143  | sucrose synthase family protein [Populus trichocarpa]                               |
| 102 | 281   | gi 225465030 | 160.63 | 60 | 11 | 2  |                      | 17196  | PREDICTED: ubiquitin-NEDD8-like protein RUB2 [Vitis vinifera]                       |
| 650 | 17197 | gi 566153824 | 160.2  | 52 | 8  | 1  | Carbamidomethylation | 17248  | ubiquitin-conjugating enzyme family protein [Populus trichocarpa]                   |
| 364 | 194   | gi 225442018 | 160.16 | 22 | 8  | 1  | Carbamidomethylation | 33909  | PREDICTED: 40S ribosomal protein SA [Vitis vinifera]                                |

|      |       |              |        |    |    |   |                                        |        |                                                                             |
|------|-------|--------------|--------|----|----|---|----------------------------------------|--------|-----------------------------------------------------------------------------|
| 743  | 17001 | gi 566167613 | 160.11 | 23 | 9  | 2 | Carbamidomethylation;<br>Oxidation (M) | 60440  | chaperonin family protein [Populus<br>trichocarpa]                          |
| 356  | 16776 | gi 224095561 | 159.82 | 11 | 8  | 2 | Carbamidomethylation                   | 97704  | hypothetical protein<br>POPTR_0007s01200g [Populus<br>trichocarpa]          |
| 465  | 229   | gi 731427020 | 159.81 | 20 | 12 | 3 | Carbamidomethylation;<br>Oxidation (M) | 76330  | PREDICTED: glycine--tRNA ligase<br>1 mitochondrial [Vitis vinifera]         |
| 246  | 176   | gi 225448546 | 159.55 | 39 | 12 | 1 | Carbamidomethylation                   | 29880  | PREDICTED: 40S ribosomal protein<br>S4-1 [Vitis vinifera]                   |
| 554  | 204   | gi 731401620 | 159.32 | 14 | 11 | 3 | Carbamidomethylation                   | 104406 | PREDICTED: ATPase 10 plasma<br>membrane-type [Vitis vinifera]               |
| 366  | 237   | gi 225446579 | 158.32 | 17 | 11 | 2 | Carbamidomethylation;<br>Oxidation (M) | 63486  | PREDICTED: ketol-acid<br>reductoisomerase chloroplastic<br>[Vitis vinifera] |
| 779  | 17453 | gi 224088276 | 158.24 | 21 | 8  | 2 | Carbamidomethylation                   | 50030  | leucine aminopeptidase family<br>protein [Populus trichocarpa]              |
| 279  | 170   | gi 225446944 | 158.08 | 30 | 9  | 2 | Carbamidomethylation                   | 43340  | PREDICTED: protochlorophyllide<br>reductase [Vitis vinifera]                |
| 266  | 175   | gi 225434482 | 157.97 | 39 | 12 | 1 | Carbamidomethylation                   | 29851  | PREDICTED: 40S ribosomal protein<br>S4 [Vitis vinifera]                     |
| 545  | 16729 | gi 566160536 | 157.95 | 14 | 9  | 1 | Carbamidomethylation                   | 91733  | phospholipase D family protein<br>[Populus trichocarpa]                     |
| 468  | 282   | gi 731423943 | 157.78 | 46 | 9  | 2 | Carbamidomethylation                   | 19961  | PREDICTED: 40S ribosomal protein<br>S10 [Vitis vinifera]                    |
| 1037 | 785   | gi 225459806 | 157.5  | 19 | 9  | 1 | Carbamidomethylation                   | 57322  | PREDICTED: T-complex protein 1<br>subunit beta [Vitis vinifera]             |
| 417  | 16756 | gi 566157403 | 157.2  | 20 | 10 | 1 | Carbamidomethylation                   | 57254  | hypothetical protein<br>POPTR_0002s10990g [Populus<br>trichocarpa]          |
| 290  | 258   | gi 731404310 | 157.06 | 27 | 8  | 5 | Carbamidomethylation                   | 33129  | PREDICTED: putative<br>lactoylglutathione lyase [Vitis<br>vinifera]         |
| 325  | 214   | gi 526117762 | 157.04 | 50 | 13 | 1 | Carbamidomethylation                   | 29376  | 14-3-3 protein [Vitis vinifera]                                             |
| 677  | 335   | gi 225445867 | 156.54 | 18 | 8  | 2 | Carbamidomethylation                   | 60743  | PREDICTED: leucine<br>aminopeptidase 1 [Vitis vinifera]                     |
| 787  | 16921 | gi 224123784 | 156.4  | 23 | 10 | 2 | Carbamidomethylation                   | 58663  | hypothetical protein<br>POPTR_0013s05500g [Populus<br>trichocarpa]          |

|      |       |              |        |    |    |    |                                     |        |                                                                                      |
|------|-------|--------------|--------|----|----|----|-------------------------------------|--------|--------------------------------------------------------------------------------------|
| 94   | 16659 | gi 224110772 | 156.27 | 35 | 14 | 1  | Carbamidomethylation                | 37124  | glyceraldehyde 3-phosphate dehydrogenase family protein [Populus trichocarpa]        |
| 638  | 17101 | gi 566165991 | 156.19 | 21 | 8  | 1  | Carbamidomethylation                | 51717  | hypothetical protein POPTR_0004s10870g [Populus trichocarpa]                         |
| 736  | 17378 | gi 566157671 | 156.06 | 16 | 6  | 1  | Carbamidomethylation                | 71798  | hypothetical protein POPTR_0002s12570g [Populus trichocarpa]                         |
| 788  | 16938 | gi 224145979 | 155.84 | 18 | 9  | 2  | Carbamidomethylation                | 58735  | hypothetical protein POPTR_0019s04980g [Populus trichocarpa]                         |
| 556  | 428   | gi 225464279 | 155.7  | 13 | 11 | 2  | Carbamidomethylation                | 119705 | PREDICTED: protein argonaute 1 [Vitis vinifera]                                      |
| 580  | 247   | gi 225452974 | 155.57 | 28 | 16 | 11 |                                     | 58482  | PREDICTED: probable mitochondrial-processing peptidase subunit beta [Vitis vinifera] |
| 623  | 16897 | gi 224135653 | 155.55 | 11 | 8  | 1  | Carbamidomethylation                | 106660 | putative plasma membrane H <sup>+</sup> ATPase family protein [Populus trichocarpa]  |
| 172  | 16867 | gi 566147823 | 155.5  | 15 | 10 | 3  | Carbamidomethylation; Oxidation (M) | 83349  | hypothetical protein POPTR_0001s07870g [Populus trichocarpa]                         |
| 425  | 417   | gi 225429850 | 155.41 | 31 | 7  | 5  |                                     | 24915  | PREDICTED: proteasome subunit beta type-6 [Vitis vinifera]                           |
| 1155 | 1142  | gi 225426194 | 155.33 | 15 | 9  | 1  | Carbamidomethylation                | 100047 | PREDICTED: beta-adaptin-like protein B [Vitis vinifera]                              |
| 540  | 223   | gi 225429530 | 155.3  | 20 | 8  | 3  | Carbamidomethylation                | 54362  | PREDICTED: UDP-sulfoquinovose synthase chloroplastic [Vitis vinifera]                |
| 759  | 16828 | gi 224120474 | 155.25 | 12 | 10 | 1  | Carbamidomethylation                | 117667 | hypothetical protein POPTR_0012s03410g [Populus trichocarpa]                         |
| 350  | 16815 | gi 224117218 | 155.08 | 23 | 8  | 1  | Carbamidomethylation                | 43107  | NADPH-protochlorophyllide oxidoreductase family protein [Populus trichocarpa]        |
| 499  | 16706 | gi 224113365 | 154.94 | 10 | 11 | 1  | Carbamidomethylation                | 130750 | NtN2 family protein [Populus trichocarpa]                                            |

|     |       |              |        |    |    |   |                                        |        |                                                                                |
|-----|-------|--------------|--------|----|----|---|----------------------------------------|--------|--------------------------------------------------------------------------------|
| 492 | 16993 | gi 566199099 | 154.9  | 43 | 9  | 1 | Carbamidomethylation                   | 19933  | hypothetical protein POPTR_0013s02900g [Populus trichocarpa]                   |
| 739 | 16970 | gi 568244554 | 154.6  | 25 | 6  | 6 |                                        | 39549  | photosystem II protein D2 (plastid) [Camellia oleifera]                        |
| 346 | 16640 | gi 671743230 | 154.38 | 14 | 9  | 8 | Carbamidomethylation                   | 82370  | photosystem I P700 apoprotein A2 (chloroplast) [Camellia petelotii]            |
| 477 | 16791 | gi 566173570 | 154.26 | 27 | 11 | 1 | Carbamidomethylation                   | 44912  | hypothetical protein POPTR_0005s27550g [Populus trichocarpa]                   |
| 651 | 337   | gi 225423961 | 154.14 | 11 | 8  | 4 | Carbamidomethylation                   | 103148 | PREDICTED: alpha-xylosidase 1 [Vitis vinifera]                                 |
| 512 | 17017 | gi 566210666 | 153.8  | 15 | 6  | 1 | Carbamidomethylation                   | 51605  | hypothetical protein POPTR_0017s01390g [Populus trichocarpa]                   |
| 568 | 558   | gi 225437493 | 153.72 | 18 | 8  | 1 | Carbamidomethylation                   | 58594  | PREDICTED: importin subunit alpha [Vitis vinifera]                             |
| 672 | 852   | gi 225423722 | 153.43 | 36 | 6  | 3 |                                        | 25584  | PREDICTED: proteasome subunit alpha type-2-B [Vitis vinifera]                  |
| 844 | 596   | gi 225466690 | 153.42 | 23 | 8  | 6 |                                        | 42525  | PREDICTED: sedoheptulose-1 7-bisphosphatase chloroplastic [Vitis vinifera]     |
| 178 | 16985 | gi 224100781 | 153.19 | 21 | 8  | 1 | Carbamidomethylation                   | 37413  | putative adenosine kinase family protein [Populus trichocarpa]                 |
| 351 | 16891 | gi 224109580 | 153.17 | 15 | 12 | 1 | Carbamidomethylation;<br>Oxidation (M) | 115877 | 2-oxoglutarate dehydrogenase E1 component family protein [Populus trichocarpa] |
| 456 | 222   | gi 225430398 | 153.11 | 22 | 10 | 2 |                                        | 50823  | PREDICTED: aspartate aminotransferase chloroplastic [Vitis vinifera]           |
| 108 | 28868 | gi 224120992 | 153.05 | 63 | 10 | 1 |                                        | 14687  | UBIQUITIN EXTENSION protein 1 [Populus trichocarpa]                            |
| 594 | 449   | gi 731420830 | 153.03 | 30 | 7  | 1 |                                        | 31951  | PREDICTED: prohibitin-1 mitochondrial [Vitis vinifera]                         |
| 375 | 17019 | gi 566193834 | 153.02 | 17 | 11 | 1 | Carbamidomethylation                   | 63609  | hypothetical protein POPTR_0011s05250g [Populus trichocarpa]                   |
| 610 | 17053 | gi 566184833 | 152.9  | 22 | 9  | 2 | Carbamidomethylation                   | 53373  | alanine-2-oxoglutarate aminotransferase 1 family protein [Populus trichocarpa] |



|      |       |              |        |    |    |    |                      |        |                                                                                                           |
|------|-------|--------------|--------|----|----|----|----------------------|--------|-----------------------------------------------------------------------------------------------------------|
| 467  | 452   | gi 225434588 | 152.89 | 49 | 11 | 1  | Carbamidomethylation | 21882  | PREDICTED: peptidyl-prolyl cis-trans isomerase CYP20-1 [Vitis vinifera]                                   |
| 500  | 16940 | gi 566206623 | 152.65 | 17 | 10 | 3  | Carbamidomethylation | 54072  | aldehyde dehydrogenase 1 precursor family protein [Populus trichocarpa]                                   |
| 529  | 16969 | gi 224097488 | 152.44 | 8  | 9  | 1  | Carbamidomethylation | 103480 | hypothetical protein POPTR_0008s01100g [Populus trichocarpa]                                              |
| 502  | 314   | gi 225432110 | 152.19 | 18 | 9  | 4  | Carbamidomethylation | 52920  | PREDICTED: dihydrolipoyl dehydrogenase mitochondrial [Vitis vinifera]                                     |
| 292  | 16655 | gi 224146592 | 152.16 | 50 | 13 | 13 | Carbamidomethylation | 24975  | 60S ribosomal protein L10 [Populus trichocarpa]                                                           |
| 1071 | 16949 | gi 224056978 | 152.1  | 10 | 8  | 1  | Carbamidomethylation | 123482 | hypothetical protein POPTR_0001s04200g [Populus trichocarpa]                                              |
| 609  | 16960 | gi 566211039 | 151.93 | 10 | 9  | 3  |                      | 124467 | DegP protease family protein [Populus trichocarpa]                                                        |
| 528  | 17207 | gi 566151109 | 151.75 | 25 | 10 | 1  | Carbamidomethylation | 37403  | hypothetical protein POPTR_0001s26400g [Populus trichocarpa]                                              |
| 696  | 416   | gi 225456641 | 151.6  | 11 | 8  | 1  | Carbamidomethylation | 105309 | PREDICTED: plasma membrane ATPase 1 isoform X1 [Vitis vinifera]                                           |
| 867  | 273   | gi 731411266 | 151.42 | 11 | 10 | 2  | Carbamidomethylation | 134450 | PREDICTED: cullin-associated NEDD8-dissociated protein 1 [Vitis vinifera]                                 |
| 771  | 593   | gi 731412938 | 151.37 | 8  | 10 | 1  | Carbamidomethylation | 155024 | PREDICTED: probable phosphoribosylformylglycinamide synthase chloroplastic/mitochondrial [Vitis vinifera] |
| 635  | 311   | gi 225430390 | 151.33 | 22 | 10 | 4  | Carbamidomethylation | 57260  | PREDICTED: threonine synthase chloroplastic [Vitis vinifera]                                              |
| 315  | 16797 | gi 224109062 | 151.23 | 31 | 11 | 1  |                      | 42679  | cytosolic phosphoglycerate kinase family protein [Populus trichocarpa]                                    |
| 519  | 16951 | gi 224097508 | 151.04 | 10 | 12 | 1  | Carbamidomethylation | 132402 | NtN2 family protein [Populus trichocarpa]                                                                 |

|     |       |              |        |    |    |   |                      |        |                                                                                                    |
|-----|-------|--------------|--------|----|----|---|----------------------|--------|----------------------------------------------------------------------------------------------------|
| 912 | 17418 | gi 568244568 | 150.75 | 21 | 7  | 7 |                      | 56272  | acetyl-CoA carboxylase<br>carboxyltransferase beta subunit<br>(plastid) [Camellia oleifera]        |
| 318 | 16634 | gi 224059642 | 150.34 | 26 | 11 | 1 |                      | 42100  | adenine nucleotide translocator<br>family protein [Populus trichocarpa]                            |
| 480 | 269   | gi 359476642 | 150.32 | 25 | 9  | 1 | Carbamidomethylation | 42804  | PREDICTED: fructose-bisphosphate<br>aldolase 1 chloroplastic-like [Vitis<br>vinifera]              |
| 656 | 441   | gi 225462272 | 150.21 | 32 | 7  | 1 |                      | 31679  | PREDICTED: prohibitin-1<br>mitochondrial isoform X1 [Vitis<br>vinifera]                            |
| 289 | 165   | gi 359493870 | 149.91 | 22 | 10 | 4 | Carbamidomethylation | 42815  | PREDICTED: protochlorophyllide<br>reductase chloroplastic [Vitis<br>vinifera]                      |
| 498 | 140   | gi 359475304 | 149.84 | 16 | 13 | 4 | Carbamidomethylation | 98624  | PREDICTED: coatomer subunit<br>gamma-2 [Vitis vinifera]                                            |
| 682 | 293   | gi 225455784 | 149.56 | 22 | 8  | 6 | Carbamidomethylation | 50558  | PREDICTED: enolase 1<br>chloroplastic [Vitis vinifera]                                             |
| 393 | 363   | gi 225464852 | 149.41 | 57 | 7  | 1 | Carbamidomethylation | 16577  | PREDICTED: ubiquitin-conjugating<br>enzyme E2 variant 1D [Vitis<br>vinifera]                       |
| 320 | 17257 | gi 224108938 | 149.35 | 38 | 5  | 1 | Carbamidomethylation | 17381  | hypothetical protein<br>POPTR_0010s17020g [Populus<br>trichocarpa]                                 |
| 354 | 487   | gi 225433247 | 149.19 | 49 | 6  | 6 | Carbamidomethylation | 15031  | PREDICTED: 60S ribosomal protein<br>L23 [Vitis vinifera]                                           |
| 371 | 16912 | gi 566213236 | 149.1  | 41 | 10 | 1 |                      | 29568  | 14-3-3 family protein [Populus<br>trichocarpa]                                                     |
| 841 | 276   | gi 225432012 | 148.93 | 22 | 9  | 4 | Carbamidomethylation | 54243  | PREDICTED: galactokinase [Vitis<br>vinifera]                                                       |
| 732 | 525   | gi 225426063 | 148.88 | 24 | 9  | 2 | Carbamidomethylation | 53896  | PREDICTED: 6-phosphogluconate<br>dehydrogenase decarboxylating 1<br>chloroplastic [Vitis vinifera] |
| 774 | 310   | gi 225429772 | 148.87 | 12 | 9  | 2 | Carbamidomethylation | 104811 | PREDICTED: plasma membrane<br>ATPase 4 [Vitis vinifera]                                            |
| 267 | 16829 | gi 224087813 | 148.8  | 31 | 9  | 1 | Carbamidomethylation | 29763  | hypothetical protein<br>POPTR_0006s10460g [Populus<br>trichocarpa]                                 |
| 478 | 16958 | gi 224099363 | 148.12 | 11 | 9  | 2 |                      | 101194 | alpha-xylosidase family protein<br>[Populus trichocarpa]                                           |

|     |       |              |        |    |    |    |                      |        |                                                                                             |
|-----|-------|--------------|--------|----|----|----|----------------------|--------|---------------------------------------------------------------------------------------------|
| 345 | 301   | gi 225452510 | 147.58 | 16 | 11 | 3  | Carbamidomethylation | 58057  | PREDICTED: aldehyde dehydrogenase family 2 member B7 mitochondrial [Vitis vinifera]         |
| 313 | 16825 | gi 566210060 | 147.58 | 31 | 9  | 1  | Carbamidomethylation | 29720  | hypothetical protein POPTR_0016s13210g [Populus trichocarpa]                                |
| 157 | 17277 | gi 566170863 | 147.57 | 53 | 8  | 8  |                      | 11409  | histone H4 family protein [Populus trichocarpa]                                             |
| 276 | 17071 | gi 224101413 | 147.51 | 45 | 6  | 1  | Carbamidomethylation | 17417  | eukaryotic translation initiation factor 5A isoform VI family protein [Populus trichocarpa] |
| 587 | 17069 | gi 224077927 | 147.3  | 22 | 8  | 1  | Carbamidomethylation | 42796  | latex plastidic aldolase-like family protein [Populus trichocarpa]                          |
| 509 | 17097 | gi 566161423 | 147.25 | 32 | 8  | 8  | Carbamidomethylation | 24286  | 60S ribosomal protein L15 [Populus trichocarpa]                                             |
| 566 | 316   | gi 359480881 | 147.25 | 13 | 8  | 7  | Carbamidomethylation | 94936  | PREDICTED: beta-galactosidase 10 [Vitis vinifera]                                           |
| 837 | 17036 | gi 224063997 | 147.24 | 12 | 6  | 2  |                      | 67268  | NAD-dependent malic enzyme family protein [Populus trichocarpa]                             |
| 843 | 320   | gi 225441629 | 147.17 | 17 | 8  | 2  | Carbamidomethylation | 58891  | PREDICTED: T-complex protein 1 subunit theta [Vitis vinifera]                               |
| 295 | 16633 | gi 566186668 | 147.13 | 26 | 11 | 2  |                      | 41811  | ADP family protein [Populus trichocarpa]                                                    |
| 871 | 306   | gi 731438745 | 147.12 | 12 | 8  | 4  | Carbamidomethylation | 92847  | PREDICTED: DNA replication licensing factor MCM6 [Vitis vinifera]                           |
| 309 | 216   | gi 526117840 | 147.12 | 20 | 14 | 2  | Carbamidomethylation | 58698  | 3-deoxy-D-arabino-heptulosonate-7-phosphate synthase [Vitis vinifera]                       |
| 513 | 378   | gi 225439761 | 146.88 | 18 | 9  | 5  | Carbamidomethylation | 44771  | PREDICTED: 60S ribosomal protein L4 [Vitis vinifera]                                        |
| 644 | 17494 | gi 224134414 | 146.88 | 30 | 5  | 2  |                      | 25625  | Proteasome subunit alpha type 2 family protein [Populus trichocarpa]                        |
| 783 | 17094 | gi 224065699 | 146.69 | 22 | 10 | 10 | Carbamidomethylation | 75559  | Cell division protein ftsH [Populus trichocarpa]                                            |
| 586 | 590   | gi 225424316 | 146.66 | 19 | 8  | 3  | Carbamidomethylation | 63641  | PREDICTED: phosphoglucomutase cytoplasmic [Vitis vinifera]                                  |
| 583 | 16749 | gi 566209033 | 146.58 | 8  | 10 | 1  | Carbamidomethylation | 130968 | UBIQUITIN-SPECIFIC PROTEASE 12 family protein [Populus trichocarpa]                         |

|      |       |              |        |    |    |   |                                        |        |                                                                                                   |
|------|-------|--------------|--------|----|----|---|----------------------------------------|--------|---------------------------------------------------------------------------------------------------|
| 982  | 16991 | gi 566196314 | 146.58 | 5  | 8  | 2 | Carbamidomethylation                   | 244200 | NADH-dependent glutamate synthase family protein [Populus trichocarpa]                            |
| 1042 | 458   | gi 359475502 | 146.49 | 28 | 7  | 1 | Carbamidomethylation                   | 37652  | PREDICTED: malate dehydrogenase glyoxysomal [Vitis vinifera]                                      |
| 740  | 16788 | gi 566171760 | 146.35 | 7  | 11 | 1 | Carbamidomethylation                   | 252377 | acetyl-CoA carboxylase family protein [Populus trichocarpa]                                       |
| 572  | 447   | gi 359494836 | 146.19 | 12 | 9  | 3 | Carbamidomethylation                   | 61508  | PREDICTED: pyrophosphate--fructose 6-phosphate 1-phosphotransferase subunit beta [Vitis vinifera] |
| 652  | 16827 | gi 566182445 | 146.01 | 14 | 11 | 1 | Carbamidomethylation;<br>Oxidation (M) | 115769 | 2-oxoglutarate dehydrogenase E1 component family protein [Populus trichocarpa]                    |
| 607  | 16870 | gi 224092216 | 145.98 | 18 | 8  | 7 | Carbamidomethylation                   | 57364  | glycine hydroxymethyltransferase family protein [Populus trichocarpa]                             |
| 654  | 16748 | gi 224060514 | 145.95 | 16 | 8  | 4 | Carbamidomethylation                   | 70476  | polyadenylate-binding family protein [Populus trichocarpa]                                        |
| 514  | 1030  | gi 225453246 | 145.74 | 21 | 10 | 5 |                                        | 69276  | PREDICTED: dynamin-related protein 1E [Vitis vinifera]                                            |
| 455  | 16783 | gi 224084622 | 145.6  | 48 | 12 | 1 |                                        | 29301  | 14-3-3 protein 32kDa endonuclease [Populus trichocarpa]                                           |
| 395  | 255   | gi 526117940 | 145.59 | 9  | 7  | 2 | Carbamidomethylation                   | 91805  | phospholipase D alpha [Vitis vinifera]                                                            |
| 989  | 17343 | gi 224068388 | 145.47 | 18 | 6  | 1 | Carbamidomethylation                   | 53197  | Fumarate hydratase 1 family protein [Populus trichocarpa]                                         |
| 653  | 550   | gi 359488197 | 145.24 | 9  | 9  | 3 |                                        | 123095 | PREDICTED: protease Do-like 7 isoform X1 [Vitis vinifera]                                         |
| 344  | 149   | gi 225435480 | 144.63 | 24 | 10 | 1 |                                        | 42838  | PREDICTED: ADP ATP carrier protein mitochondrial [Vitis vinifera]                                 |
| 665  | 16955 | gi 566202195 | 144.39 | 29 | 7  | 7 |                                        | 34821  | hypothetical protein POPTR_0014s03240g [Populus trichocarpa]                                      |
| 360  | 17194 | gi 566181525 | 144.39 | 23 | 9  | 1 |                                        | 42160  | hypothetical protein POPTR_0008s00350g [Populus trichocarpa]                                      |

|      |       |              |        |    |    |   |                                        |        |                                                                                                           |
|------|-------|--------------|--------|----|----|---|----------------------------------------|--------|-----------------------------------------------------------------------------------------------------------|
| 674  | 424   | gi 225428772 | 144.37 | 11 | 10 | 4 | Carbamidomethylation;<br>Oxidation (M) | 121098 | PREDICTED: presequence protease<br>2 chloroplastic/mitochondrial-like<br>[Vitis vinifera]                 |
| 262  | 16965 | gi 224104103 | 144.2  | 36 | 7  | 7 |                                        | 24868  | 40S ribosomal protein S8 [Populus<br>trichocarpa]                                                         |
| 851  | 17457 | gi 224129210 | 144.15 | 14 | 5  | 2 | Carbamidomethylation                   | 41121  | truncated acetyl Co-A<br>acetyltransferase-like family protein<br>[Populus trichocarpa]                   |
| 527  | 17126 | gi 224141487 | 143.93 | 24 | 12 | 2 | Carbamidomethylation                   | 52967  | UDP-glucose 6-dehydrogenase<br>family protein [Populus trichocarpa]                                       |
| 624  | 1727  | gi 225465837 | 143.93 | 6  | 5  | 4 | Carbamidomethylation                   | 46787  | PREDICTED: protein ASPARTIC<br>PROTEASE IN GUARD CELL 2<br>[Vitis vinifera]                               |
| 668  | 400   | gi 731401656 | 143.47 | 41 | 8  | 8 | Carbamidomethylation                   | 25978  | PREDICTED: proteasome subunit<br>alpha type-5 [Vitis vinifera]                                            |
| 697  | 750   | gi 225457502 | 143.47 | 28 | 7  | 7 | Carbamidomethylation                   | 35357  | PREDICTED: probable succinyl-<br>CoA ligase [ADP-forming] subunit<br>alpha mitochondrial [Vitis vinifera] |
| 772  | 601   | gi 731390491 | 143.45 | 12 | 7  | 4 | Carbamidomethylation                   | 84964  | PREDICTED: protein transport<br>protein SEC23-like [Vitis vinifera]                                       |
| 941  | 16998 | gi 566156890 | 143.44 | 18 | 8  | 3 |                                        | 44077  | hypothetical protein<br>POPTR_0002s08240g [Populus<br>trichocarpa]                                        |
| 230  | 17398 | gi 224138586 | 143.12 | 24 | 7  | 3 |                                        | 27577  | ascorbate peroxidase family protein<br>[Populus trichocarpa]                                              |
| 620  | 243   | gi 225429750 | 143.09 | 13 | 10 | 3 | Carbamidomethylation                   | 105919 | PREDICTED: coatomer subunit<br>beta-1 [Vitis vinifera]                                                    |
| 369  | 17040 | gi 566184599 | 143.06 | 28 | 11 | 3 |                                        | 37085  | glyceraldehyde 3-phosphate<br>dehydrogenase family protein<br>[Populus trichocarpa]                       |
| 578  | 16637 | gi 566192573 | 143    | 20 | 12 | 2 | Carbamidomethylation                   | 56288  | hypothetical protein<br>POPTR_0010s24550g [Populus<br>trichocarpa]                                        |
| 1170 | 690   | gi 359473310 | 142.88 | 36 | 7  | 1 | Carbamidomethylation                   | 35042  | PREDICTED: serine/threonine-<br>protein phosphatase PP2A-2<br>catalytic subunit [Vitis vinifera]          |
| 701  | 16821 | gi 566215982 | 142.85 | 16 | 9  | 1 | Carbamidomethylation                   | 60519  | hypothetical protein<br>POPTR_0019s00210g [Populus<br>trichocarpa]                                        |

|     |       |              |        |    |    |   |                                     |        |                                                                                           |
|-----|-------|--------------|--------|----|----|---|-------------------------------------|--------|-------------------------------------------------------------------------------------------|
| 629 | 16785 | gi 224075451 | 142.8  | 14 | 11 | 2 | Carbamidomethylation                | 77174  | Glycyl-tRNA synthetase family protein [Populus trichocarpa]                               |
| 796 | 17264 | gi 224121954 | 142.77 | 24 | 5  | 1 | Carbamidomethylation                | 26774  | hypothetical protein POPTR_0012s09720g [Populus trichocarpa]                              |
| 457 | 333   | gi 225447725 | 142.66 | 25 | 7  | 4 | Carbamidomethylation                | 61438  | PREDICTED: calnexin homolog [Vitis vinifera]                                              |
| 494 | 16889 | gi 566170533 | 142.61 | 20 | 8  | 8 | Carbamidomethylation                | 47176  | hypothetical protein POPTR_0005s10290g [Populus trichocarpa]                              |
| 877 | 17061 | gi 224092184 | 142.37 | 17 | 6  | 1 | Carbamidomethylation                | 53653  | hypothetical protein POPTR_0006s24440g [Populus trichocarpa]                              |
| 805 | 17066 | gi 566167939 | 142.2  | 18 | 12 | 4 | Carbamidomethylation                | 84308  | hypothetical protein POPTR_0004s22010g [Populus trichocarpa]                              |
| 741 | 1010  | gi 225451999 | 142.16 | 21 | 10 | 1 |                                     | 59112  | PREDICTED: T-complex protein 1 subunit zeta [Vitis vinifera]                              |
| 591 | 541   | gi 225436900 | 142.1  | 27 | 9  | 1 | Carbamidomethylation                | 47680  | PREDICTED: glutamine synthetase leaf isozyme chloroplastic [Vitis vinifera]               |
| 937 | 648   | gi 731424733 | 142.05 | 4  | 8  | 2 | Carbamidomethylation                | 241380 | PREDICTED: glutamate synthase 1 [NADH] chloroplastic isoform X2 [Vitis vinifera]          |
| 510 | 245   | gi 225462254 | 141.87 | 23 | 10 | 2 | Carbamidomethylation                | 45573  | PREDICTED: glyceraldehyde-3-phosphate dehydrogenase GAPCP1 chloroplastic [Vitis vinifera] |
| 766 | 490   | gi 225446595 | 141.84 | 46 | 8  | 1 | Carbamidomethylation                | 17220  | PREDICTED: ubiquitin-conjugating enzyme E2 36 [Vitis vinifera]                            |
| 486 | 17820 | gi 566175251 | 141.82 | 12 | 5  | 5 |                                     | 34569  | hypothetical protein POPTR_0006s08710g [Populus trichocarpa]                              |
| 549 | 969   | gi 225426753 | 141.41 | 16 | 10 | 3 | Carbamidomethylation; Oxidation (M) | 81719  | PREDICTED: primary amine oxidase [Vitis vinifera]                                         |
| 303 | 181   | gi 359476269 | 141.22 | 50 | 12 | 2 | Carbamidomethylation                | 26279  | PREDICTED: 40S ribosomal protein S3-3 [Vitis vinifera]                                    |
| 558 | 413   | gi 225457075 | 141.1  | 16 | 7  | 1 | Carbamidomethylation                | 58613  | PREDICTED: aldehyde dehydrogenase family 2 member B4 mitochondrial [Vitis vinifera]       |

|     |       |              |        |    |    |   |                      |        |                                                                                                |
|-----|-------|--------------|--------|----|----|---|----------------------|--------|------------------------------------------------------------------------------------------------|
| 523 | 16732 | gi 435856353 | 141.1  | 24 | 8  | 8 | Carbamidomethylation | 38951  | photosystem II protein D1 (chloroplast) [Camellia sinensis]                                    |
| 693 | 17446 | gi 224122988 | 141.09 | 19 | 9  | 1 | Carbamidomethylation | 58241  | Importin alpha-1 subunit family protein [Populus trichocarpa]                                  |
| 874 | 1222  | gi 225457219 | 141.09 | 29 | 8  | 4 | Carbamidomethylation | 35220  | PREDICTED: ATP synthase subunit gamma mitochondrial [Vitis vinifera]                           |
| 322 | 16800 | gi 224129102 | 141.06 | 23 | 8  | 8 | Carbamidomethylation | 42388  | hypothetical protein POPTR_0014s15960g [Populus trichocarpa]                                   |
| 437 | 16635 | gi 566178983 | 140.89 | 26 | 10 | 1 |                      | 41070  | hypothetical protein POPTR_0007s01010g [Populus trichocarpa]                                   |
| 896 | 17351 | gi 224108774 | 140.68 | 22 | 8  | 1 | Carbamidomethylation | 54256  | Galactokinase family protein [Populus trichocarpa]                                             |
| 430 | 379   | gi 225442192 | 140.56 | 32 | 7  | 3 |                      | 21908  | PREDICTED: 60S ribosomal protein L9 [Vitis vinifera]                                           |
| 715 | 390   | gi 225425838 | 140.5  | 33 | 7  | 3 | Carbamidomethylation | 26900  | PREDICTED: adenylate kinase 4-like [Vitis vinifera]                                            |
| 330 | 16840 | gi 566158870 | 140.28 | 63 | 9  | 9 |                      | 17678  | hypothetical protein POPTR_0002s19210g [Populus trichocarpa]                                   |
| 232 | 16937 | gi 224098421 | 140.17 | 32 | 9  | 1 | Carbamidomethylation | 27259  | Triosephosphate isomerase family protein [Populus trichocarpa]                                 |
| 582 | 261   | gi 225458173 | 140.11 | 26 | 8  | 1 | Carbamidomethylation | 44535  | PREDICTED: 26S protease regulatory subunit S10B homolog B [Vitis vinifera]                     |
| 807 | 745   | gi 731406154 | 139.79 | 5  | 8  | 3 | Carbamidomethylation | 199529 | PREDICTED: brefeldin A-inhibited guanine nucleotide-exchange protein 5 [Vitis vinifera]        |
| 643 | 16896 | gi 224107259 | 139.69 | 23 | 8  | 1 | Carbamidomethylation | 47894  | glutamine synthetase family protein [Populus trichocarpa]                                      |
| 770 | 16892 | gi 224143423 | 139.69 | 12 | 9  | 2 | Carbamidomethylation | 105985 | putative coatmer beta subunit family protein [Populus trichocarpa]                             |
| 858 | 699   | gi 225435309 | 139.69 | 16 | 10 | 2 | Carbamidomethylation | 82345  | PREDICTED: 4-hydroxy-3-methylbut-2-en-1-yl diphosphate synthase chloroplastic [Vitis vinifera] |

|      |       |              |        |    |    |   |                                     |        |                                                                                    |
|------|-------|--------------|--------|----|----|---|-------------------------------------|--------|------------------------------------------------------------------------------------|
| 1043 | 814   | gi 225433414 | 139.62 | 22 | 6  | 6 |                                     | 36594  | PREDICTED: probable voltage-gated potassium channel subunit beta [Vitis vinifera]  |
| 1158 | 17498 | gi 566160463 | 139.61 | 16 | 5  | 5 |                                     | 49456  | hypothetical protein POPTR_0003s02420g [Populus trichocarpa]                       |
| 642  | 17296 | gi 566213188 | 139.53 | 28 | 8  | 2 | Carbamidomethylation                | 43893  | nodule-enhanced malate dehydrogenase family protein [Populus trichocarpa]          |
| 544  | 16617 | gi 568244555 | 139.43 | 18 | 8  | 8 |                                     | 51822  | photosystem II CP43 chlorophyll apoprotein (plastid) [Camellia oleifera]           |
| 939  | 359   | gi 225465253 | 139.32 | 11 | 8  | 1 |                                     | 100128 | PREDICTED: dynamin-2A [Vitis vinifera]                                             |
| 522  | 251   | gi 225461654 | 139.26 | 31 | 8  | 2 |                                     | 28864  | PREDICTED: 14-3-3-like protein D [Vitis vinifera]                                  |
| 812  | 17358 | gi 224114720 | 139.11 | 25 | 8  | 8 | Carbamidomethylation                | 45639  | Magnesium-chelatase subunit chlI family protein [Populus trichocarpa]              |
| 742  | 772   | gi 225464906 | 139.09 | 48 | 6  | 6 |                                     | 16377  | PREDICTED: 40S ribosomal protein S14 [Vitis vinifera]                              |
| 300  | 235   | gi 225444782 | 138.97 | 50 | 12 | 2 | Carbamidomethylation                | 26314  | PREDICTED: 40S ribosomal protein S3-3 [Vitis vinifera]                             |
| 1151 | 609   | gi 731392506 | 138.92 | 7  | 8  | 3 | Carbamidomethylation                | 129324 | PREDICTED: carbamoyl-phosphate synthase large chain chloroplastic [Vitis vinifera] |
| 551  | 17104 | gi 671743459 | 138.84 | 73 | 5  | 5 | Carbamidomethylation                | 9038   | photosystem I subunit VII (chloroplast) [Camellia reticulata]                      |
| 666  | 17844 | gi 566198902 | 138.77 | 41 | 6  | 1 |                                     | 15349  | hypothetical protein POPTR_0013s01890g [Populus trichocarpa]                       |
| 508  | 602   | gi 359476682 | 138.76 | 25 | 6  | 1 | Carbamidomethylation                | 24349  | PREDICTED: soluble inorganic pyrophosphatase isoform X2 [Vitis vinifera]           |
| 658  | 598   | gi 225454009 | 138.73 | 13 | 6  | 1 | Carbamidomethylation                | 80666  | PREDICTED: transketolase chloroplastic [Vitis vinifera]                            |
| 501  | 17258 | gi 224140177 | 138.41 | 15 | 9  | 3 | Carbamidomethylation                | 53698  | adenylosuccinate synthetase family protein [Populus trichocarpa]                   |
| 250  | 226   | gi 359497288 | 138.3  | 19 | 11 | 4 | Carbamidomethylation; Oxidation (M) | 64041  | PREDICTED: peptidyl-prolyl cis-trans isomerase FKBP62 isoform X1 [Vitis vinifera]  |



|      |       |              |        |    |    |   |                      |       |                                                                                                             |
|------|-------|--------------|--------|----|----|---|----------------------|-------|-------------------------------------------------------------------------------------------------------------|
| 695  | 17238 | gi 566164179 | 138.3  | 17 | 8  | 2 | Carbamidomethylation | 61299 | hypothetical protein POPTR_0004s00550g [Populus trichocarpa]                                                |
| 818  | 17259 | gi 566170121 | 138.22 | 16 | 7  | 3 | Carbamidomethylation | 56464 | 1L-myo-inositol 1-phosphate synthase family protein [Populus trichocarpa]                                   |
| 390  | 16874 | gi 224082478 | 138.13 | 24 | 10 | 2 | Carbamidomethylation | 44381 | ribosomal protein 1 [Populus trichocarpa]                                                                   |
| 535  | 307   | gi 225468761 | 138.11 | 24 | 6  | 1 | Carbamidomethylation | 35289 | PREDICTED: oxygen-evolving enhancer protein 1 chloroplastic [Vitis vinifera]                                |
| 576  | 843   | gi 225439878 | 138.09 | 25 | 6  | 1 | Carbamidomethylation | 24585 | PREDICTED: soluble inorganic pyrophosphatase [Vitis vinifera]                                               |
| 1123 | 17291 | gi 224100197 | 138.03 | 32 | 7  | 1 | Carbamidomethylation | 35036 | type 2A protein phosphatase-II [Populus trichocarpa]                                                        |
| 304  | 16784 | gi 566175737 | 138.02 | 24 | 9  | 2 | Carbamidomethylation | 47050 | Monodehydroascorbate reductase family protein [Populus trichocarpa]                                         |
| 202  | 595   | gi 225447408 | 138.01 | 34 | 7  | 3 | Carbamidomethylation | 28115 | PREDICTED: 60S ribosomal protein L8 [Vitis vinifera]                                                        |
| 336  | 188   | gi 731408817 | 137.95 | 22 | 9  | 1 |                      | 41099 | PREDICTED: ADP ATP carrier protein 3 mitochondrial [Vitis vinifera]                                         |
| 484  | 16593 | gi 552541036 | 137.92 | 21 | 12 | 8 |                      | 55539 | ATP synthase CF1 alpha subunit (chloroplast) [Camellia yunnanensis]                                         |
| 524  | 364   | gi 225451146 | 137.77 | 16 | 10 | 7 |                      | 57701 | PREDICTED: bifunctional 3-dehydroquinate dehydratase/shikimate dehydrogenase chloroplastic [Vitis vinifera] |
| 749  | 1570  | gi 731427302 | 137.61 | 31 | 6  | 6 |                      | 17173 | PREDICTED: transcription factor BTF3 homolog 4 [Vitis vinifera]                                             |
| 559  | 369   | gi 359492927 | 137.45 | 27 | 6  | 2 |                      | 28650 | PREDICTED: 14-3-3-like protein GF14 kappa [Vitis vinifera]                                                  |
| 617  | 17520 | gi 224104913 | 137.28 | 53 | 5  | 2 | Carbamidomethylation | 12354 | 60S ribosomal protein L30 [Populus trichocarpa]                                                             |
| 257  | 16818 | gi 224135747 | 136.99 | 49 | 13 | 2 | Carbamidomethylation | 26076 | 40S ribosomal protein S3 [Populus trichocarpa]                                                              |
| 746  | 592   | gi 225437537 | 136.77 | 42 | 8  | 8 |                      | 22019 | PREDICTED: GTP-binding protein SAR1A [Vitis vinifera]                                                       |

|      |       |              |        |    |    |   |                                     |        |                                                                                                                                       |
|------|-------|--------------|--------|----|----|---|-------------------------------------|--------|---------------------------------------------------------------------------------------------------------------------------------------|
| 391  | 621   | gi 225442061 | 136.76 | 17 | 7  | 1 |                                     | 45655  | PREDICTED: oligouridylate-binding protein 1B isoform X1 [Vitis vinifera]                                                              |
| 826  | 1012  | gi 225430650 | 136.7  | 28 | 8  | 1 | Carbamidomethylation; Oxidation (M) | 43927  | PREDICTED: pyruvate dehydrogenase E1 component subunit beta-3 chloroplastic [Vitis vinifera]                                          |
| 782  | 581   | gi 731401982 | 136.6  | 11 | 7  | 2 | Carbamidomethylation                | 60389  | PREDICTED: dihydrolipoyllysine-residue acetyltransferase component 2 of pyruvate dehydrogenase complex mitochondrial [Vitis vinifera] |
| 754  | 17771 | gi 566148911 | 136.55 | 17 | 5  | 3 | Carbamidomethylation                | 48782  | hypothetical protein POPTR_0001s14280g [Populus trichocarpa]                                                                          |
| 606  | 17234 | gi 566207041 | 136.5  | 15 | 5  | 3 | Carbamidomethylation                | 53652  | glutamate 1-semialdehyde aminotransferase family protein [Populus trichocarpa]                                                        |
| 885  | 17148 | gi 224054150 | 136.48 | 29 | 8  | 2 | Carbamidomethylation                | 38004  | transducin family protein [Populus trichocarpa]                                                                                       |
| 675  | 765   | gi 225443272 | 136.37 | 18 | 10 | 2 | Carbamidomethylation; Oxidation (M) | 66288  | PREDICTED: D-3-phosphoglycerate dehydrogenase 3 chloroplastic-like [Vitis vinifera]                                                   |
| 806  | 17401 | gi 566160244 | 136.29 | 5  | 6  | 4 | Carbamidomethylation                | 181683 | hypothetical protein POPTR_0003s01280g [Populus trichocarpa]                                                                          |
| 1095 | 303   | gi 731406982 | 136.15 | 9  | 7  | 1 | Carbamidomethylation                | 102765 | PREDICTED: coatomer subunit beta'-1-like [Vitis vinifera]                                                                             |
| 314  | 618   | gi 225464412 | 136.04 | 35 | 8  | 7 |                                     | 16188  | PREDICTED: 40S ribosomal protein S17 [Vitis vinifera]                                                                                 |
| 875  | 963   | gi 225424564 | 136.02 | 16 | 8  | 8 | Carbamidomethylation                | 59200  | PREDICTED: T-complex protein 1 subunit epsilon [Vitis vinifera]                                                                       |
| 824  | 462   | gi 225463163 | 135.96 | 18 | 9  | 1 | Carbamidomethylation                | 60505  | PREDICTED: T-complex protein 1 subunit gamma [Vitis vinifera]                                                                         |
| 936  | 16961 | gi 566166593 | 135.95 | 8  | 8  | 1 | Carbamidomethylation                | 122467 | hypothetical protein POPTR_0004s14960g [Populus trichocarpa]                                                                          |
| 802  | 932   | gi 225450626 | 135.94 | 15 | 6  | 1 | Carbamidomethylation                | 39269  | PREDICTED: probable protein disulfide-isomerase A6 [Vitis vinifera]                                                                   |

|      |       |              |        |    |    |   |                      |        |                                                                                                |
|------|-------|--------------|--------|----|----|---|----------------------|--------|------------------------------------------------------------------------------------------------|
| 1006 | 445   | gi 225454087 | 135.83 | 12 | 6  | 2 |                      | 66696  | PREDICTED: NAD-dependent malic enzyme 59 kDa isoform mitochondrial [Vitis vinifera]            |
| 631  | 17070 | gi 224064707 | 135.82 | 13 | 7  | 3 | Carbamidomethylation | 58836  | mitochondrial aldehyde dehydrogenase family protein [Populus trichocarpa]                      |
| 538  | 253   | gi 225451581 | 135.67 | 29 | 10 | 4 | Carbamidomethylation | 38690  | PREDICTED: mitochondrial phosphate carrier protein 3 mitochondrial isoform X1 [Vitis vinifera] |
| 1259 | 17015 | gi 224129596 | 135.67 | 16 | 6  | 1 | Carbamidomethylation | 45020  | Succinyl-CoA ligase beta-chain family protein [Populus trichocarpa]                            |
| 588  | 538   | gi 225439982 | 135.36 | 49 | 6  | 1 | Carbamidomethylation | 17793  | PREDICTED: 60S ribosomal protein L12 [Vitis vinifera]                                          |
| 569  | 461   | gi 731404671 | 135.33 | 27 | 7  | 2 |                      | 29622  | PREDICTED: 14-3-3-like protein D isoform X1 [Vitis vinifera]                                   |
| 81   | 410   | gi 359475042 | 135.26 | 37 | 9  | 1 | Carbamidomethylation | 18313  | PREDICTED: peptidyl-prolyl cis-trans isomerase [Vitis vinifera]                                |
| 984  | 17228 | gi 224103569 | 135.26 | 8  | 7  | 1 | Carbamidomethylation | 112946 | hypothetical protein POPTR_0009s10650g [Populus trichocarpa]                                   |
| 1028 | 938   | gi 225450669 | 135.25 | 7  | 7  | 4 |                      | 113734 | PREDICTED: eukaryotic translation initiation factor 3 subunit A [Vitis vinifera]               |
| 577  | 473   | gi 225436253 | 135.12 | 13 | 7  | 1 | Carbamidomethylation | 66904  | PREDICTED: probable methylenetetrahydrofolate reductase [Vitis vinifera]                       |
| 691  | 664   | gi 731403303 | 135.1  | 33 | 5  | 1 | Carbamidomethylation | 15026  | PREDICTED: 40S ribosomal protein S12 [Vitis vinifera]                                          |
| 526  | 271   | gi 225439064 | 134.93 | 16 | 7  | 4 |                      | 61092  | PREDICTED: 2 3-bisphosphoglycerate-independent phosphoglycerate mutase [Vitis vinifera]        |
| 352  | 17173 | gi 566149424 | 134.82 | 18 | 7  | 1 | Oxidation (M)        | 46427  | oligouridylate-binding family protein [Populus trichocarpa]                                    |
| 704  | 519   | gi 225450981 | 134.75 | 26 | 8  | 8 | Carbamidomethylation | 51125  | PREDICTED: serine--tRNA ligase [Vitis vinifera]                                                |
| 414  | 437   | gi 225465198 | 134.72 | 13 | 6  | 1 |                      | 48147  | PREDICTED: elongation factor 1-gamma-like [Vitis vinifera]                                     |

|      |       |              |        |    |    |   |                                     |        |                                                                                     |
|------|-------|--------------|--------|----|----|---|-------------------------------------|--------|-------------------------------------------------------------------------------------|
| 828  | 599   | gi 225459126 | 134.68 | 14 | 8  | 2 | Carbamidomethylation                | 68420  | PREDICTED: glucose-6-phosphate isomerase 1 chloroplastic [Vitis vinifera]           |
| 517  | 17045 | gi 224084209 | 134.66 | 18 | 6  | 1 | Carbamidomethylation                | 35142  | O2 evolving complex 33kD family protein [Populus trichocarpa]                       |
| 612  | 708   | gi 731392629 | 134.62 | 49 | 6  | 1 | Carbamidomethylation                | 17778  | PREDICTED: 60S ribosomal protein L12 [Vitis vinifera]                               |
| 563  | 962   | gi 225447723 | 134.51 | 8  | 9  | 3 |                                     | 109436 | PREDICTED: staphylococcal nuclease domain-containing protein 1 [Vitis vinifera]     |
| 401  | 361   | gi 225431804 | 134.46 | 31 | 7  | 7 |                                     | 24165  | PREDICTED: 60S ribosomal protein L19-2 [Vitis vinifera]                             |
| 602  | 16801 | gi 224105405 | 134.46 | 11 | 9  | 1 | Carbamidomethylation                | 98780  | hypothetical protein POPTR_0009s11800g [Populus trichocarpa]                        |
| 671  | 17062 | gi 224090212 | 134.21 | 28 | 9  | 2 | Carbamidomethylation                | 29609  | 40S ribosomal protein S2 [Populus trichocarpa]                                      |
| 949  | 637   | gi 225431563 | 133.82 | 14 | 6  | 1 | Carbamidomethylation                | 51250  | PREDICTED: UTP--glucose-1-phosphate uridylyltransferase isoform X1 [Vitis vinifera] |
| 637  | 667   | gi 225470804 | 133.74 | 23 | 7  | 1 | Carbamidomethylation                | 45224  | PREDICTED: phosphoribulokinase chloroplastic [Vitis vinifera]                       |
| 835  | 17480 | gi 566164885 | 133.73 | 12 | 8  | 1 |                                     | 81287  | Vesicle-fusing ATPase family protein [Populus trichocarpa]                          |
| 905  | 17229 | gi 566176021 | 133.48 | 12 | 8  | 1 |                                     | 77716  | phenylalanine ammonia-lyase family protein [Populus trichocarpa]                    |
| 836  | 17095 | gi 224100953 | 133.07 | 21 | 6  | 1 | Carbamidomethylation                | 39107  | thymidine diphospho-glucose 4-6-dehydratase family protein [Populus trichocarpa]    |
| 1051 | 691   | gi 731397286 | 133.01 | 17 | 7  | 2 | Carbamidomethylation; Oxidation (M) | 56371  | PREDICTED: inositol-3-phosphate synthase [Vitis vinifera]                           |
| 622  | 17131 | gi 224057882 | 133.01 | 11 | 8  | 2 |                                     | 89495  | outer membrane family protein [Populus trichocarpa]                                 |
| 1221 | 706   | gi 225446693 | 132.99 | 14 | 7  | 4 |                                     | 74318  | PREDICTED: ATP-dependent zinc metalloprotease FTSH 2 chloroplastic [Vitis vinifera] |
| 180  | 17005 | gi 566146555 | 132.91 | 36 | 10 | 3 |                                     | 23812  | 60S ribosomal protein L13 [Populus trichocarpa]                                     |

|      |       |              |        |    |   |   |                      |        |                                                                                         |
|------|-------|--------------|--------|----|---|---|----------------------|--------|-----------------------------------------------------------------------------------------|
| 969  | 17353 | gi 224142207 | 132.74 | 11 | 5 | 2 | Carbamidomethylation | 65147  | hypothetical protein POPTR_0018s09380g [Populus trichocarpa]                            |
| 920  | 1769  | gi 225461445 | 132.58 | 14 | 9 | 2 |                      | 81247  | PREDICTED: vesicle-fusing ATPase [Vitis vinifera]                                       |
| 820  | 422   | gi 731439184 | 132.58 | 12 | 9 | 9 |                      | 109426 | PREDICTED: 26S proteasome non-ATPase regulatory subunit 1 homolog A [Vitis vinifera]    |
| 856  | 17252 | gi 224075976 | 132.51 | 26 | 6 | 6 | Carbamidomethylation | 31893  | hypothetical protein POPTR_0003s21070g [Populus trichocarpa]                            |
| 777  | 947   | gi 225463556 | 132.42 | 7  | 7 | 1 | Carbamidomethylation | 125024 | PREDICTED: protein TOPLESS [Vitis vinifera]                                             |
| 1005 | 17515 | gi 224141339 | 132.28 | 25 | 7 | 1 | Carbamidomethylation | 44746  | PYRUVATE DEHYDROGENASE E1 BETA family protein [Populus trichocarpa]                     |
| 608  | 16922 | gi 224058615 | 132.11 | 24 | 6 | 3 | Carbamidomethylation | 33817  | hypothetical protein POPTR_0001s08570g [Populus trichocarpa]                            |
| 340  | 17042 | gi 566164883 | 132.1  | 25 | 9 | 2 | Carbamidomethylation | 43246  | ketol-acid reductoisomerase family protein partial [Populus trichocarpa]                |
| 1070 | 628   | gi 225435754 | 132.09 | 7  | 7 | 1 | Carbamidomethylation | 123396 | PREDICTED: importin-5 [Vitis vinifera]                                                  |
| 626  | 482   | gi 526118008 | 131.99 | 12 | 5 | 1 |                      | 56117  | flavonoid 3' hydroxylase [Vitis vinifera]                                               |
| 597  | 572   | gi 731382516 | 131.96 | 17 | 5 | 5 | Carbamidomethylation | 37912  | PREDICTED: ankyrin repeat domain-containing protein 2 isoform X2 [Vitis vinifera]       |
| 958  | 17018 | gi 566148676 | 131.94 | 13 | 8 | 1 | Carbamidomethylation | 77001  | Glycyl-tRNA synthetase family protein [Populus trichocarpa]                             |
| 854  | 17027 | gi 566195881 | 131.85 | 17 | 5 | 2 | Carbamidomethylation | 44659  | hypothetical protein POPTR_0011s16690g [Populus trichocarpa]                            |
| 1252 | 398   | gi 731405921 | 131.78 | 26 | 5 | 5 | Carbamidomethylation | 34871  | PREDICTED: phytochrome-associated serine/threonine-protein phosphatase [Vitis vinifera] |
| 539  | 313   | gi 225458424 | 131.76 | 19 | 6 | 1 | Carbamidomethylation | 35120  | PREDICTED: oxygen-evolving enhancer protein 1 chloroplastic [Vitis vinifera]            |

|      |       |              |        |    |   |   |                      |       |                                                                                            |
|------|-------|--------------|--------|----|---|---|----------------------|-------|--------------------------------------------------------------------------------------------|
| 728  | 17433 | gi 566214954 | 131.57 | 18 | 6 | 5 | Carbamidomethylation | 39277 | hypothetical protein POPTR_0018s09170g [Populus trichocarpa]                               |
| 311  | 17311 | gi 566254838 | 131.52 | 23 | 6 | 2 |                      | 28211 | hypothetical protein POPTR_0789s00200g [Populus trichocarpa]                               |
| 496  | 389   | gi 225441754 | 131.46 | 16 | 9 | 3 | Carbamidomethylation | 53382 | PREDICTED: adenylosuccinate synthetase 2 chloroplastic [Vitis vinifera]                    |
| 613  | 610   | gi 225464928 | 131.46 | 15 | 7 | 2 |                      | 46452 | PREDICTED: eukaryotic initiation factor 4A-3 [Vitis vinifera]                              |
| 627  | 16893 | gi 566170007 | 131.45 | 29 | 8 | 8 | Carbamidomethylation | 28435 | hypothetical protein POPTR_0005s07380g [Populus trichocarpa]                               |
| 991  | 611   | gi 225437455 | 131.41 | 18 | 7 | 2 | Carbamidomethylation | 53532 | PREDICTED: fumarate hydratase 1 mitochondrial [Vitis vinifera]                             |
| 762  | 741   | gi 731399769 | 131.41 | 36 | 7 | 2 | Carbamidomethylation | 30174 | PREDICTED: 2-Cys peroxiredoxin isoform X1 [Vitis vinifera]                                 |
| 952  | 468   | gi 731369971 | 131.23 | 19 | 6 | 4 | Carbamidomethylation | 42894 | PREDICTED: probable fructose-bisphosphate aldolase 3 chloroplastic [Vitis vinifera]        |
| 663  | 17656 | gi 566190366 | 131.21 | 13 | 7 | 2 |                      | 63088 | cytosolic phosphoglucomutase family protein [Populus trichocarpa]                          |
| 964  | 17635 | gi 224092266 | 131.15 | 14 | 7 | 1 | Carbamidomethylation | 63096 | hypothetical protein POPTR_0006s25280g [Populus trichocarpa]                               |
| 1329 | 693   | gi 225437557 | 131.15 | 10 | 6 | 2 | Carbamidomethylation | 81022 | PREDICTED: DNA replication licensing factor MCM7 [Vitis vinifera]                          |
| 533  | 17013 | gi 566164286 | 130.92 | 15 | 7 | 2 | Carbamidomethylation | 44313 | T-protein of the glycine decarboxylase complex [Populus trichocarpa]                       |
| 868  | 754   | gi 225428865 | 130.83 | 10 | 5 | 1 |                      | 70683 | PREDICTED: polyadenylate-binding protein 2 [Vitis vinifera]                                |
| 723  | 562   | gi 225425272 | 130.83 | 9  | 7 | 1 | Carbamidomethylation | 74889 | PREDICTED: glycine--tRNA ligase 1 mitochondrial [Vitis vinifera]                           |
| 891  | 341   | gi 731391907 | 130.35 | 13 | 6 | 3 | Carbamidomethylation | 67493 | PREDICTED: anthranilate synthase alpha subunit 2 chloroplastic isoform X2 [Vitis vinifera] |

|      |       |              |        |    |    |   |                                     |        |                                                                                                          |
|------|-------|--------------|--------|----|----|---|-------------------------------------|--------|----------------------------------------------------------------------------------------------------------|
| 487  | 412   | gi 225443760 | 130.27 | 36 | 8  | 1 | Carbamidomethylation                | 20875  | PREDICTED: 60S ribosomal protein L11-1-like [Vitis vinifera]                                             |
| 892  | 991   | gi 359494079 | 130.24 | 12 | 6  | 6 | Carbamidomethylation                | 65102  | PREDICTED: LOW QUALITY PROTEIN: 65-kDa microtubule-associated protein 1-like [Vitis vinifera]            |
| 659  | 16707 | gi 224126969 | 129.83 | 18 | 10 | 1 |                                     | 58085  | hypothetical protein POPTR_0013s15380g [Populus trichocarpa]                                             |
| 986  | 717   | gi 225463033 | 129.7  | 14 | 9  | 9 | Carbamidomethylation                | 110326 | PREDICTED: 116 kDa U5 small nuclear ribonucleoprotein component [Vitis vinifera]                         |
| 1089 | 1348  | gi 225462545 | 129.42 | 38 | 8  | 4 | Carbamidomethylation; Oxidation (M) | 27262  | PREDICTED: proteasome subunit alpha type-4 [Vitis vinifera]                                              |
| 1030 | 17713 | gi 224100535 | 129.36 | 12 | 7  | 1 |                                     | 67584  | hypothetical protein POPTR_0008s01000g [Populus trichocarpa]                                             |
| 687  | 481   | gi 225442079 | 129.21 | 25 | 6  | 6 |                                     | 27325  | PREDICTED: proteasome subunit alpha type-6 [Vitis vinifera]                                              |
| 532  | 627   | gi 225464720 | 129.18 | 27 | 8  | 3 | Carbamidomethylation                | 44946  | PREDICTED: oxygen-dependent coproporphyrinogen-III oxidase chloroplastic-like [Vitis vinifera]           |
| 702  | 17198 | gi 566259520 | 129.08 | 22 | 6  | 1 | Carbamidomethylation                | 34228  | hypothetical protein POPTR_0030s00390g [Populus trichocarpa]                                             |
| 247  | 18507 | gi 566242200 | 129.02 | 14 | 8  | 5 |                                     | 19093  | hypothetical protein POPTR_0019s12370g partial [Populus trichocarpa]                                     |
| 781  | 644   | gi 731431241 | 128.99 | 13 | 5  | 1 |                                     | 47331  | PREDICTED: protein TIC 40 chloroplastic isoform X2 [Vitis vinifera]                                      |
| 676  | 17464 | gi 566146625 | 128.97 | 23 | 7  | 1 | Carbamidomethylation                | 45025  | Phosphoribulokinase family protein [Populus trichocarpa]                                                 |
| 727  | 1063  | gi 359491801 | 128.94 | 11 | 8  | 8 |                                     | 83367  | PREDICTED: dolichyl-diphosphooligosaccharide--protein glycosyltransferase subunit STT3B [Vitis vinifera] |
| 947  | 818   | gi 731396254 | 128.91 | 16 | 5  | 4 | Carbamidomethylation                | 40707  | PREDICTED: alcohol dehydrogenase class-3 [Vitis vinifera]                                                |

|      |       |              |        |    |    |   |                      |        |                                                                                      |
|------|-------|--------------|--------|----|----|---|----------------------|--------|--------------------------------------------------------------------------------------|
| 846  | 17503 | gi 566165056 | 128.77 | 15 | 6  | 1 | Carbamidomethylation | 36365  | hypothetical protein POPTR_0004s05340g [Populus trichocarpa]                         |
| 902  | 17297 | gi 224141065 | 128.67 | 13 | 6  | 1 |                      | 58604  | mitochondrial processing peptidase beta subunit family protein [Populus trichocarpa] |
| 1085 | 17473 | gi 224086589 | 128.49 | 11 | 5  | 1 | Carbamidomethylation | 56517  | POLLEN-PISTIL INTERACTION 2 family protein [Populus trichocarpa]                     |
| 993  | 18380 | gi 224136183 | 128.26 | 11 | 4  | 2 |                      | 70641  | acetolactate synthase family protein [Populus trichocarpa]                           |
| 1275 | 17796 | gi 566194692 | 128.08 | 19 | 4  | 2 | Carbamidomethylation | 32070  | hypothetical protein POPTR_0011s10100g [Populus trichocarpa]                         |
| 255  | 16812 | gi 566168262 | 128.08 | 16 | 10 | 3 |                      | 47873  | elongation factor 1-gamma 1 family protein [Populus trichocarpa]                     |
| 229  | 446   | gi 225465463 | 128.07 | 32 | 7  | 7 | Carbamidomethylation | 23516  | PREDICTED: 60S ribosomal protein L13a-4 [Vitis vinifera]                             |
| 1137 | 773   | gi 225440478 | 128.04 | 15 | 3  | 2 | Carbamidomethylation | 35390  | PREDICTED: aldo-keto reductase family 4 member C9-like [Vitis vinifera]              |
| 1054 | 17789 | gi 566172819 | 128.03 | 14 | 7  | 2 | Carbamidomethylation | 47443  | hypothetical protein POPTR_0005s23110g [Populus trichocarpa]                         |
| 237  | 17140 | gi 224075758 | 127.88 | 56 | 8  | 3 | Carbamidomethylation | 15268  | hypothetical protein POPTR_0003s22120g [Populus trichocarpa]                         |
| 660  | 17452 | gi 566147835 | 127.51 | 25 | 6  | 5 |                      | 26392  | hypothetical protein POPTR_0001s07920g partial [Populus trichocarpa]                 |
| 1027 | 732   | gi 731414624 | 127.51 | 7  | 7  | 5 |                      | 122431 | PREDICTED: protein transport protein SEC31 homolog B isoform X1 [Vitis vinifera]     |
| 855  | 17794 | gi 566152502 | 127.4  | 19 | 6  | 1 | Carbamidomethylation | 29370  | hypothetical protein POPTR_0001s33400g [Populus trichocarpa]                         |
| 458  | 17083 | gi 224091827 | 127.34 | 41 | 9  | 2 | Carbamidomethylation | 20659  | 60S ribosomal protein L11-2 [Populus trichocarpa]                                    |



|      |       |              |        |    |    |   |                      |        |                                                                                                                                                       |
|------|-------|--------------|--------|----|----|---|----------------------|--------|-------------------------------------------------------------------------------------------------------------------------------------------------------|
| 688  | 1226  | gi 731439514 | 127.22 | 17 | 6  | 1 | Carbamidomethylation | 41530  | PREDICTED: acetyl-CoA acetyltransferase cytosolic 1 isoform X4 [Vitis vinifera]                                                                       |
| 1183 | 1116  | gi 225463618 | 127.04 | 13 | 9  | 1 | Carbamidomethylation | 80442  | PREDICTED: pyrophosphate-energized vacuolar membrane proton pump [Vitis vinifera]                                                                     |
| 760  | 17008 | gi 566186274 | 126.96 | 25 | 7  | 2 | Carbamidomethylation | 29153  | proliferating cell nuclear antigen family protein [Populus trichocarpa]                                                                               |
| 983  | 1095  | gi 731423779 | 126.88 | 16 | 6  | 4 |                      | 63328  | PREDICTED: plastidial pyruvate kinase 2 [Vitis vinifera]                                                                                              |
| 678  | 902   | gi 225461808 | 126.86 | 16 | 10 | 1 | Carbamidomethylation | 75747  | PREDICTED: trifunctional UDP-glucose 4 6-dehydratase/UDP-4-keto-6-deoxy-D-glucose 3 5-epimerase/UDP-4-keto-L-rhamnose-reductase RHM1 [Vitis vinifera] |
| 640  | 545   | gi 526117441 | 126.79 | 7  | 8  | 3 |                      | 101670 | lipoxygenase [Vitis vinifera]                                                                                                                         |
| 1141 | 828   | gi 225427605 | 126.75 | 16 | 7  | 7 | Carbamidomethylation | 68375  | PREDICTED: ABC transporter E family member 2 [Vitis vinifera]                                                                                         |
| 840  | 728   | gi 359485890 | 126.72 | 6  | 5  | 2 | Carbamidomethylation | 83365  | PREDICTED: beta-xylosidase/alpha-L-arabinofuranosidase 2-like [Vitis vinifera]                                                                        |
| 281  | 17233 | gi 224065421 | 126.64 | 10 | 7  | 1 |                      | 64078  | hypothetical protein POPTR_0002s24970g [Populus trichocarpa]                                                                                          |
| 1069 | 3590  | gi 731418129 | 126.57 | 2  | 7  | 3 | Carbamidomethylation | 565777 | PREDICTED: auxin transport protein BIG [Vitis vinifera]                                                                                               |
| 765  | 612   | gi 225423953 | 126.41 | 25 | 6  | 3 | Oxidation (M)        | 41947  | PREDICTED: ubiquitin receptor RAD23c isoform X2 [Vitis vinifera]                                                                                      |
| 904  | 1634  | gi 731413091 | 126.4  | 24 | 6  | 1 |                      | 38789  | PREDICTED: UDP-glucuronic acid decarboxylase 5 [Vitis vinifera]                                                                                       |
| 684  | 676   | gi 731421194 | 126.39 | 31 | 6  | 3 | Carbamidomethylation | 20876  | PREDICTED: 40S ribosomal protein S13 [Vitis vinifera]                                                                                                 |
| 259  | 17038 | gi 566174988 | 126.31 | 28 | 7  | 2 |                      | 28378  | hypothetical protein POPTR_0006s07290g [Populus trichocarpa]                                                                                          |
| 698  | 365   | gi 225459918 | 126.3  | 26 | 5  | 3 | Carbamidomethylation | 30824  | PREDICTED: chlorophyll a-b binding protein CP26 chloroplastic [Vitis vinifera]                                                                        |

|      |       |              |        |    |   |   |                                     |        |                                                                                       |
|------|-------|--------------|--------|----|---|---|-------------------------------------|--------|---------------------------------------------------------------------------------------|
| 1148 | 1177  | gi 225441573 | 125.96 | 8  | 7 | 4 | Carbamidomethylation                | 107099 | PREDICTED: eukaryotic translation initiation factor 3 subunit C [Vitis vinifera]      |
| 485  | 584   | gi 225451279 | 125.69 | 17 | 5 | 1 |                                     | 29903  | PREDICTED: 40S ribosomal protein S3a-2-like [Vitis vinifera]                          |
| 1075 | 17184 | gi 224125232 | 125.63 | 14 | 6 | 1 | Carbamidomethylation                | 47047  | 19S proteasome subunit 9 family protein [Populus trichocarpa]                         |
| 734  | 520   | gi 225431090 | 125.54 | 30 | 5 | 5 |                                     | 27195  | PREDICTED: proteasome subunit alpha type-7 [Vitis vinifera]                           |
| 832  | 727   | gi 225464809 | 125.52 | 12 | 6 | 2 | Carbamidomethylation                | 56995  | PREDICTED: gamma aminobutyrate transaminase 1 mitochondrial-like [Vitis vinifera]     |
| 1348 | 17054 | gi 566183505 | 125.52 | 12 | 5 | 2 | Carbamidomethylation                | 65372  | phosphatase family protein [Populus trichocarpa]                                      |
| 1038 | 17917 | gi 566206287 | 125.49 | 18 | 6 | 2 |                                     | 35464  | ATP synthase gamma chain family protein [Populus trichocarpa]                         |
| 959  | 1027  | gi 359482368 | 125.47 | 5  | 9 | 9 |                                     | 274480 | PREDICTED: pre-mRNA-processing-splicing factor 8 [Vitis vinifera]                     |
| 511  | 547   | gi 225456295 | 125.39 | 18 | 5 | 4 |                                     | 24961  | PREDICTED: elongation factor 1-delta [Vitis vinifera]                                 |
| 521  | 17129 | gi 566149060 | 125.13 | 17 | 9 | 1 | Carbamidomethylation                | 57242  | hypothetical protein POPTR_0001s15050g [Populus trichocarpa]                          |
| 1163 | 2169  | gi 731371107 | 125.1  | 8  | 5 | 5 |                                     | 89995  | PREDICTED: probable splicing factor 3A subunit 1 [Vitis vinifera]                     |
| 116  | 859   | gi 225429614 | 124.94 | 45 | 5 | 5 | Carbamidomethylation; Oxidation (M) | 17293  | PREDICTED: 17.3 kDa class II heat shock protein [Vitis vinifera]                      |
| 630  | 17572 | gi 566179689 | 124.92 | 19 | 9 | 1 | Carbamidomethylation                | 50228  | hypothetical protein POPTR_0007s05160g [Populus trichocarpa]                          |
| 1076 | 748   | gi 225441549 | 124.91 | 18 | 8 | 7 | Carbamidomethylation                | 67018  | PREDICTED: DEAD-box ATP-dependent RNA helicase 37-like [Vitis vinifera]               |
| 1593 | 28871 | gi 225460917 | 124.83 | 16 | 6 | 6 | Carbamidomethylation                | 64249  | PREDICTED: imidazole glycerol phosphate synthase hisHF chloroplastic [Vitis vinifera] |
| 848  | 17363 | gi 224109746 | 124.78 | 14 | 5 | 5 | Carbamidomethylation                | 26377  | putative chlorophyll a/b-binding family protein [Populus trichocarpa]                 |

|      |       |              |        |    |   |   |                      |        |                                                                                                 |
|------|-------|--------------|--------|----|---|---|----------------------|--------|-------------------------------------------------------------------------------------------------|
| 931  | 17535 | gi 566180192 | 124.72 | 23 | 5 | 5 |                      | 27792  | hypothetical protein POPTR_0007s08020g [Populus trichocarpa]                                    |
| 942  | 17237 | gi 566165848 | 124.6  | 20 | 9 | 1 |                      | 59085  | hypothetical protein POPTR_0004s10100g [Populus trichocarpa]                                    |
| 1425 | 17327 | gi 224086948 | 124.45 | 19 | 6 | 1 | Carbamidomethylation | 51291  | eukaryotic translation initiation factor 3E family protein [Populus trichocarpa]                |
| 888  | 17298 | gi 224063082 | 124.42 | 22 | 5 | 5 |                      | 28992  | Photosystem II 22 kDa family protein [Populus trichocarpa]                                      |
| 1111 | 17653 | gi 566190217 | 123.95 | 12 | 3 | 1 | Carbamidomethylation | 35803  | TGF-beta receptor-interacting protein 1 [Populus trichocarpa]                                   |
| 1258 | 17778 | gi 566199576 | 123.81 | 6  | 6 | 1 | Carbamidomethylation | 123531 | hypothetical protein POPTR_0013s05320g [Populus trichocarpa]                                    |
| 1126 | 17256 | gi 224125002 | 123.21 | 10 | 5 | 1 | Carbamidomethylation | 59410  | importin alpha-1 subunit family protein [Populus trichocarpa]                                   |
| 413  | 16803 | gi 224089867 | 123.16 | 8  | 9 | 1 | Carbamidomethylation | 103746 | hypothetical protein POPTR_0006s02680g [Populus trichocarpa]                                    |
| 1437 | 17909 | gi 224133898 | 123.09 | 15 | 6 | 3 | Carbamidomethylation | 53810  | aspartyl aminopeptidase family protein [Populus trichocarpa]                                    |
| 226  | 17618 | gi 224102515 | 123.03 | 20 | 6 | 4 |                      | 29608  | porin family protein [Populus trichocarpa]                                                      |
| 811  | 548   | gi 225434863 | 122.97 | 11 | 7 | 2 |                      | 88320  | PREDICTED: protein TOC75-3 chloroplastic [Vitis vinifera]                                       |
| 1165 | 600   | gi 359490767 | 122.81 | 32 | 5 | 1 |                      | 23070  | PREDICTED: nascent polypeptide-associated complex subunit alpha-like protein 2 [Vitis vinifera] |
| 894  | 686   | gi 225429234 | 122.79 | 24 | 5 | 5 |                      | 34319  | PREDICTED: mitochondrial import receptor subunit TOM40-1 [Vitis vinifera]                       |
| 967  | 1154  | gi 225464635 | 122.66 | 19 | 7 | 1 |                      | 40639  | PREDICTED: protein SGT1 homolog isoform X2 [Vitis vinifera]                                     |
| 985  | 529   | gi 731399749 | 122.49 | 18 | 5 | 5 | Carbamidomethylation | 44581  | PREDICTED: GDHB glutamate dehydrogenase isoform X1 [Vitis vinifera]                             |
| 1099 | 606   | gi 731438689 | 122.49 | 16 | 6 | 2 | Oxidation (M)        | 44313  | PREDICTED: FAM10 family protein At4g22670 [Vitis vinifera]                                      |

|      |       |              |        |    |   |   |                      |        |                                                                                                                |
|------|-------|--------------|--------|----|---|---|----------------------|--------|----------------------------------------------------------------------------------------------------------------|
| 1303 | 17135 | gi 566177234 | 122.48 | 12 | 8 | 7 | Carbamidomethylation | 80627  | minichromosome maintenance family protein [Populus trichocarpa]                                                |
| 1120 | 17016 | gi 566148627 | 122.33 | 9  | 7 | 2 | Carbamidomethylation | 107277 | hypothetical protein POPTR_0001s12700g [Populus trichocarpa]                                                   |
| 1196 | 17396 | gi 224119992 | 122.3  | 5  | 5 | 1 | Carbamidomethylation | 143158 | hypothetical protein POPTR_0012s13100g [Populus trichocarpa]                                                   |
| 845  | 466   | gi 225426743 | 122.26 | 19 | 5 | 2 | Carbamidomethylation | 33675  | PREDICTED: bifunctional dTDP-4-dehydrorhamnose 3 5-epimerase/dTDP-4-dehydrorhamnose reductase [Vitis vinifera] |
| 450  | 17591 | gi 224111204 | 122.14 | 25 | 6 | 6 | Carbamidomethylation | 22208  | photosystem I 20kD family protein [Populus trichocarpa]                                                        |
| 775  | 405   | gi 225443308 | 122.06 | 7  | 6 | 1 | Carbamidomethylation | 106276 | PREDICTED: coatomer subunit beta-1 [Vitis vinifera]                                                            |
| 1398 | 725   | gi 225434692 | 121.99 | 9  | 6 | 2 |                      | 95490  | PREDICTED: alpha-glucan phosphorylase H isozyme [Vitis vinifera]                                               |
| 1210 | 17616 | gi 566182000 | 121.94 | 14 | 7 | 1 | Carbamidomethylation | 57819  | hypothetical protein POPTR_0008s02740g [Populus trichocarpa]                                                   |
| 1093 | 17512 | gi 566158761 | 121.93 | 15 | 4 | 1 | Carbamidomethylation | 29101  | cyclophilin family protein [Populus trichocarpa]                                                               |
| 1060 | 874   | gi 359478691 | 121.88 | 9  | 5 | 2 |                      | 92178  | PREDICTED: beta-galactosidase 8 [Vitis vinifera]                                                               |
| 1014 | 1233  | gi 225448904 | 121.88 | 13 | 5 | 1 | Carbamidomethylation | 48063  | PREDICTED: malate dehydrogenase [NADP] chloroplastic [Vitis vinifera]                                          |
| 332  | 453   | gi 225447576 | 121.72 | 31 | 6 | 1 | Carbamidomethylation | 28468  | PREDICTED: chlorophyll a-b binding protein 151 chloroplastic [Vitis vinifera]                                  |
| 542  | 630   | gi 526117351 | 121.62 | 13 | 7 | 1 | Carbamidomethylation | 56123  | uncharacterized protein LOC100251487 [Vitis vinifera]                                                          |
| 1171 | 791   | gi 359483518 | 121.54 | 14 | 7 | 4 | Carbamidomethylation | 61477  | PREDICTED: apoptosis inhibitor 5 isoform X1 [Vitis vinifera]                                                   |
| 795  | 639   | gi 731428049 | 121.52 | 11 | 4 | 2 | Carbamidomethylation | 47334  | PREDICTED: delta-aminolevulinic acid dehydratase chloroplastic [Vitis vinifera]                                |

|      |       |              |        |    |   |   |                                        |        |                                                                                       |
|------|-------|--------------|--------|----|---|---|----------------------------------------|--------|---------------------------------------------------------------------------------------|
| 861  | 678   | gi 731422506 | 121.44 | 6  | 6 | 1 | Carbamidomethylation                   | 125112 | PREDICTED: protein TOPLESS isoform X4 [Vitis vinifera]                                |
| 945  | 652   | gi 225444828 | 121.25 | 16 | 7 | 1 | Carbamidomethylation                   | 57127  | PREDICTED: threonine synthase chloroplastic [Vitis vinifera]                          |
| 1174 | 1666  | gi 526117699 | 121.2  | 18 | 6 | 4 | Carbamidomethylation                   | 49406  | 3-dehydroquinase synthase-like [Vitis vinifera]                                       |
| 690  | 692   | gi 731388721 | 121.04 | 25 | 5 | 3 |                                        | 18965  | PREDICTED: translationally-controlled tumor protein homolog [Vitis vinifera]          |
| 1121 | 935   | gi 225462922 | 120.85 | 14 | 5 | 1 | Carbamidomethylation                   | 46982  | PREDICTED: 26S proteasome non-ATPase regulatory subunit 11 homolog [Vitis vinifera]   |
| 872  | 16957 | gi 224075445 | 120.79 | 17 | 8 | 2 | Carbamidomethylation                   | 47494  | transaldolase family protein [Populus trichocarpa]                                    |
| 833  | 17372 | gi 224063299 | 120.77 | 12 | 7 | 1 |                                        | 67707  | hypothetical protein POPTR_0002s10420g [Populus trichocarpa]                          |
| 996  | 17268 | gi 566211562 | 120.71 | 12 | 7 | 2 | Carbamidomethylation                   | 49984  | hypothetical protein POPTR_0017s05490g [Populus trichocarpa]                          |
| 1053 | 697   | gi 731423169 | 120.67 | 35 | 5 | 5 | Carbamidomethylation                   | 13646  | PREDICTED: 40S ribosomal protein S20-2 [Vitis vinifera]                               |
| 706  | 17210 | gi 224136368 | 120.63 | 6  | 7 | 2 |                                        | 107885 | 110 kDa 4SNc-Tudor domain family protein [Populus trichocarpa]                        |
| 1350 | 17641 | gi 566204499 | 120.49 | 14 | 4 | 4 | Carbamidomethylation                   | 47320  | thioredoxin family protein [Populus trichocarpa]                                      |
| 1133 | 968   | gi 731379157 | 120.33 | 10 | 6 | 2 | Carbamidomethylation                   | 83594  | PREDICTED: LOW QUALITY PROTEIN: GMP synthase [glutamine-hydrolyzing] [Vitis vinifera] |
| 721  | 17795 | gi 566151913 | 120.21 | 14 | 8 | 2 | Carbamidomethylation;<br>Oxidation (M) | 62800  | D-3-phosphoglycerate dehydrogenase family protein [Populus trichocarpa]               |
| 817  | 875   | gi 225452831 | 120.2  | 27 | 8 | 1 | Carbamidomethylation                   | 43750  | PREDICTED: malate dehydrogenase chloroplastic-like [Vitis vinifera]                   |
| 1062 | 17293 | gi 566206565 | 120.15 | 18 | 5 | 5 | Carbamidomethylation                   | 39138  | hypothetical protein POPTR_0015s08180g [Populus trichocarpa]                          |

|      |       |              |        |    |   |   |                                     |        |                                                                                         |
|------|-------|--------------|--------|----|---|---|-------------------------------------|--------|-----------------------------------------------------------------------------------------|
| 1584 | 17822 | gi 224074207 | 120.06 | 13 | 3 | 3 | Carbamidomethylation                | 46983  | carbamoyl phosphate synthetase a family protein [Populus trichocarpa]                   |
| 886  | 651   | gi 225434329 | 120    | 16 | 9 | 1 |                                     | 57685  | PREDICTED: trans-cinnamate 4-monooxygenase [Vitis vinifera]                             |
| 784  | 16888 | gi 224131368 | 119.94 | 17 | 7 | 4 | Carbamidomethylation                | 48921  | hypothetical protein POPTR_0014s13720g [Populus trichocarpa]                            |
| 592  | 17014 | gi 224140653 | 119.79 | 12 | 6 | 3 | Carbamidomethylation; Oxidation (M) | 61182  | phosphoglycerate mutase family protein [Populus trichocarpa]                            |
| 1234 | 17623 | gi 224098483 | 119.56 | 22 | 5 | 1 | Carbamidomethylation                | 39656  | cytokinesis defective 1 family protein [Populus trichocarpa]                            |
| 461  | 569   | gi 225453215 | 119.49 | 28 | 9 | 2 |                                     | 23975  | PREDICTED: 60S ribosomal protein L13-1 [Vitis vinifera]                                 |
| 525  | 17587 | gi 566184208 | 119.48 | 16 | 4 | 1 | Carbamidomethylation                | 27210  | hypothetical protein POPTR_0008s15820g [Populus trichocarpa]                            |
| 1016 | 832   | gi 225461287 | 119.32 | 31 | 4 | 4 | Carbamidomethylation                | 24076  | PREDICTED: cytochrome b6-f complex iron-sulfur subunit 1 chloroplastic [Vitis vinifera] |
| 374  | 493   | gi 225436843 | 119.3  | 46 | 6 | 1 |                                     | 14570  | PREDICTED: histone H2AX [Vitis vinifera]                                                |
| 1058 | 17711 | gi 224122948 | 119.26 | 11 | 9 | 1 |                                     | 79226  | inorganic pyrophosphatase family protein [Populus trichocarpa]                          |
| 860  | 964   | gi 225438529 | 119.11 | 22 | 6 | 6 |                                     | 27683  | PREDICTED: probable ATP synthase 24 kDa subunit mitochondrial [Vitis vinifera]          |
| 1116 | 457   | gi 225433588 | 119.08 | 9  | 6 | 3 | Carbamidomethylation                | 90882  | PREDICTED: probable methionine--tRNA ligase [Vitis vinifera]                            |
| 1197 | 438   | gi 225425318 | 119.05 | 8  | 6 | 2 | Carbamidomethylation                | 108282 | PREDICTED: DNA replication licensing factor MCM2 [Vitis vinifera]                       |
| 1074 | 549   | gi 225430366 | 119.02 | 7  | 7 | 2 |                                     | 108100 | PREDICTED: chaperone protein ClpB4 mitochondrial [Vitis vinifera]                       |
| 973  | 17225 | gi 566211906 | 118.95 | 10 | 7 | 3 |                                     | 90312  | dynamamin-like family protein [Populus trichocarpa]                                     |
| 1154 | 758   | gi 225430549 | 118.93 | 11 | 6 | 3 | Carbamidomethylation                | 82761  | PREDICTED: eukaryotic translation initiation factor 3 subunit B [Vitis vinifera]        |

|      |       |              |        |    |    |   |                      |        |                                                                                        |
|------|-------|--------------|--------|----|----|---|----------------------|--------|----------------------------------------------------------------------------------------|
| 598  | 1085  | gi 225430422 | 118.54 | 19 | 5  | 1 | Carbamidomethylation | 17796  | PREDICTED: 40S ribosomal protein S11 [Vitis vinifera]                                  |
| 1363 | 17552 | gi 566205234 | 118.51 | 30 | 5  | 1 |                      | 24533  | hypothetical protein POPTR_0015s00570g [Populus trichocarpa]                           |
| 483  | 17658 | gi 224092113 | 118.36 | 10 | 5  | 2 |                      | 40471  | carbon-nitrogen hydrolase family protein [Populus trichocarpa]                         |
| 864  | 454   | gi 225449132 | 118.29 | 32 | 6  | 6 |                      | 19768  | PREDICTED: ATP synthase subunit d mitochondrial [Vitis vinifera]                       |
| 895  | 1208  | gi 225424530 | 118.24 | 13 | 3  | 1 |                      | 36021  | PREDICTED: eukaryotic translation initiation factor 3 subunit I [Vitis vinifera]       |
| 816  | 17625 | gi 566204315 | 118.23 | 9  | 8  | 4 | Carbamidomethylation | 68355  | hypothetical protein POPTR_0014s14690g [Populus trichocarpa]                           |
| 689  | 654   | gi 731415751 | 118.21 | 29 | 5  | 2 | Carbamidomethylation | 20904  | PREDICTED: 60S ribosomal protein L18-2-like [Vitis vinifera]                           |
| 1008 | 18208 | gi 566210556 | 118.12 | 16 | 7  | 1 |                      | 40209  | putative protein phosphatase [Populus trichocarpa]                                     |
| 611  | 357   | gi 731399677 | 117.99 | 8  | 8  | 1 | Carbamidomethylation | 102437 | PREDICTED: protein argonaute 4A-like [Vitis vinifera]                                  |
| 946  | 18119 | gi 224063066 | 117.9  | 11 | 6  | 1 |                      | 56188  | disulfide-isomerase family protein [Populus trichocarpa]                               |
| 428  | 17510 | gi 224078822 | 117.76 | 40 | 5  | 1 |                      | 13770  | hypothetical protein POPTR_0004s03100g [Populus trichocarpa]                           |
| 531  | 642   | gi 225432758 | 117.75 | 15 | 5  | 2 | Carbamidomethylation | 29774  | PREDICTED: 40S ribosomal protein S3a-1 [Vitis vinifera]                                |
| 712  | 629   | gi 359492254 | 117.65 | 22 | 10 | 2 | Carbamidomethylation | 40876  | PREDICTED: ferredoxin--NADP reductase leaf-type isozyme chloroplastic [Vitis vinifera] |
| 953  | 1329  | gi 731405046 | 117.52 | 11 | 6  | 6 | Carbamidomethylation | 86013  | PREDICTED: DNA replication licensing factor MCM3 homolog 2 [Vitis vinifera]            |
| 548  | 17536 | gi 566178862 | 117.47 | 17 | 6  | 5 |                      | 34943  | hypothetical protein POPTR_0007s00300g [Populus trichocarpa]                           |
| 382  | 669   | gi 731386337 | 117.45 | 23 | 5  | 4 | Carbamidomethylation | 20640  | PREDICTED: serine/arginine-rich splicing factor RSZ22 isoform X2 [Vitis vinifera]      |

|      |       |              |        |    |   |   |                      |       |                                                                                                |
|------|-------|--------------|--------|----|---|---|----------------------|-------|------------------------------------------------------------------------------------------------|
| 957  | 1264  | gi 225442963 | 117.45 | 9  | 4 | 4 |                      | 35176 | PREDICTED: methyl-CpG-binding domain-containing protein 11 [Vitis vinifera]                    |
| 1211 | 1022  | gi 225456800 | 117.42 | 11 | 7 | 1 |                      | 77878 | PREDICTED: programmed cell death protein 4 [Vitis vinifera]                                    |
| 1199 | 17450 | gi 566176147 | 117.41 | 14 | 7 | 3 | Carbamidomethylation | 41553 | hypothetical protein POPTR_0006s13470g [Populus trichocarpa]                                   |
| 470  | 899   | gi 225431269 | 117.34 | 12 | 4 | 2 | Carbamidomethylation | 36580 | PREDICTED: peroxidase 72 [Vitis vinifera]                                                      |
| 713  | 1005  | gi 225435084 | 117.33 | 34 | 6 | 1 |                      | 17444 | PREDICTED: 60S ribosomal protein L23a [Vitis vinifera]                                         |
| 1399 | 17093 | gi 224067984 | 117.11 | 14 | 6 | 3 | Carbamidomethylation | 68220 | dynammin-like protein B [Populus trichocarpa]                                                  |
| 1676 | 17459 | gi 566206568 | 116.99 | 9  | 4 | 2 | Carbamidomethylation | 54924 | Betaine-aldehyde dehydrogenase family protein [Populus trichocarpa]                            |
| 1594 | 17583 | gi 224137814 | 116.96 | 17 | 6 | 1 | Carbamidomethylation | 51194 | eukaryotic translation initiation factor 3E family protein [Populus trichocarpa]               |
| 803  | 17342 | gi 224077760 | 116.94 | 34 | 6 | 6 | Carbamidomethylation | 15880 | 40S ribosomal protein S19 [Populus trichocarpa]                                                |
| 1096 | 17698 | gi 224058900 | 116.91 | 23 | 6 | 1 | Carbamidomethylation | 27383 | Proteasome subunit alpha type 3 family protein [Populus trichocarpa]                           |
| 751  | 619   | gi 225453250 | 116.87 | 8  | 4 | 4 |                      | 69341 | PREDICTED: NAD-dependent malic enzyme 62 kDa isoform mitochondrial isoform X2 [Vitis vinifera] |
| 831  | 551   | gi 731440696 | 116.78 | 10 | 6 | 4 |                      | 64402 | PREDICTED: hsp70-Hsp90 organizing protein 3-like [Vitis vinifera]                              |
| 1380 | 1009  | gi 359480225 | 116.65 | 17 | 4 | 1 | Carbamidomethylation | 27397 | PREDICTED: peptidyl-prolyl cis-trans isomerase [Vitis vinifera]                                |
| 1207 | 1093  | gi 225438067 | 116.6  | 11 | 4 | 1 | Carbamidomethylation | 45402 | PREDICTED: succinyl-CoA ligase [ADP-forming] subunit beta mitochondrial [Vitis vinifera]       |
| 1055 | 1087  | gi 731394579 | 116.6  | 23 | 5 | 5 | Carbamidomethylation | 24605 | PREDICTED: 60S ribosomal protein L10a-1-like [Vitis vinifera]                                  |
| 735  | 17345 | gi 224075876 | 116.59 | 26 | 6 | 1 | Carbamidomethylation | 20527 | peptidyl-prolyl cis-trans isomerase family protein [Populus trichocarpa]                       |



|      |       |              |        |    |   |   |                                     |       |                                                                                           |
|------|-------|--------------|--------|----|---|---|-------------------------------------|-------|-------------------------------------------------------------------------------------------|
| 927  | 17254 | gi 224075058 | 116.56 | 18 | 6 | 1 | Carbamidomethylation                | 53712 | 6-phosphogluconate dehydrogenase family protein [Populus trichocarpa]                     |
| 398  | 1257  | gi 225430939 | 116.5  | 25 | 7 | 6 | Carbamidomethylation                | 33557 | PREDICTED: isopentenyl-diphosphate Delta-isomerase I [Vitis vinifera]                     |
| 1173 | 17769 | gi 566192876 | 116.43 | 17 | 6 | 2 | Carbamidomethylation                | 47035 | hypothetical protein POPTR_0010s26170g [Populus trichocarpa]                              |
| 929  | 17681 | gi 224140109 | 116.38 | 34 | 7 | 2 |                                     | 17267 | hypothetical protein POPTR_0016s08070g [Populus trichocarpa]                              |
| 1052 | 903   | gi 225453158 | 116.37 | 16 | 5 | 2 | Carbamidomethylation                | 41234 | PREDICTED: probable fructokinase-6 chloroplastic [Vitis vinifera]                         |
| 883  | 17487 | gi 566148625 | 116.33 | 10 | 4 | 1 | Carbamidomethylation                | 54744 | hypothetical protein POPTR_0001s12690g [Populus trichocarpa]                              |
| 1571 | 1117  | gi 225455336 | 116.3  | 10 | 5 | 2 | Carbamidomethylation                | 96439 | PREDICTED: importin subunit beta-1 [Vitis vinifera]                                       |
| 1304 | 17697 | gi 566213932 | 116.25 | 10 | 7 | 3 |                                     | 82500 | Eukaryotic translation initiation factor 3 subunit 9 family protein [Populus trichocarpa] |
| 1339 | 597   | gi 225441924 | 116.18 | 15 | 5 | 1 | Carbamidomethylation                | 51126 | PREDICTED: eukaryotic translation initiation factor 3 subunit E [Vitis vinifera]          |
| 681  | 17370 | gi 566192956 | 116.13 | 20 | 6 | 1 | Carbamidomethylation                | 44225 | hypothetical protein POPTR_0011s00650g [Populus trichocarpa]                              |
| 1009 | 17548 | gi 224139168 | 116.02 | 9  | 4 | 3 | Carbamidomethylation; Oxidation (M) | 65070 | pyruvate decarboxylase family protein [Populus trichocarpa]                               |
| 879  | 743   | gi 359482848 | 116    | 10 | 4 | 2 |                                     | 43630 | PREDICTED: nucleosome assembly protein 1;4 [Vitis vinifera]                               |
| 1098 | 17046 | gi 224085984 | 115.99 | 10 | 5 | 3 | Carbamidomethylation                | 61382 | multi-copper oxidase type 1 family protein [Populus trichocarpa]                          |
| 1291 | 17602 | gi 566191545 | 115.99 | 16 | 6 | 2 | Carbamidomethylation                | 40561 | hypothetical protein POPTR_0010s18770g [Populus trichocarpa]                              |
| 1531 | 17393 | gi 566151113 | 115.74 | 9  | 5 | 1 |                                     | 76209 | hypothetical protein POPTR_0001s26420g [Populus trichocarpa]                              |

|      |       |              |        |    |   |   |                      |        |                                                                                                 |
|------|-------|--------------|--------|----|---|---|----------------------|--------|-------------------------------------------------------------------------------------------------|
| 710  | 766   | gi 225436215 | 115.66 | 12 | 6 | 3 | Carbamidomethylation | 70115  | PREDICTED: lysine--tRNA ligase-like [Vitis vinifera]                                            |
| 1201 | 910   | gi 225449380 | 115.58 | 17 | 5 | 1 | Carbamidomethylation | 39535  | PREDICTED: mannose-1-phosphate guanylyltransferase 1 [Vitis vinifera]                           |
| 628  | 17918 | gi 224063643 | 115.52 | 25 | 5 | 1 | Carbamidomethylation | 17863  | 40S ribosomal protein S11 [Populus trichocarpa]                                                 |
| 1021 | 1517  | gi 225445883 | 115.32 | 27 | 4 | 1 | Carbamidomethylation | 14777  | PREDICTED: 40S ribosomal protein S12 [Vitis vinifera]                                           |
| 614  | 17566 | gi 566254203 | 115.26 | 36 | 7 | 1 |                      | 17971  | hypothetical protein POPTR_1064s00200g [Populus trichocarpa]                                    |
| 1287 | 17346 | gi 224138722 | 115.18 | 20 | 5 | 1 |                      | 39574  | isocitrate dehydrogenase family protein [Populus trichocarpa]                                   |
| 1205 | 2521  | gi 225453076 | 115.18 | 9  | 5 | 5 | Carbamidomethylation | 80919  | PREDICTED: NADH dehydrogenase [ubiquinone] iron-sulfur protein 1 mitochondrial [Vitis vinifera] |
| 1424 | 823   | gi 225445396 | 115.1  | 23 | 6 | 1 | Carbamidomethylation | 37783  | PREDICTED: serine-threonine kinase receptor-associated protein [Vitis vinifera]                 |
| 1566 | 17913 | gi 224065745 | 115.09 | 6  | 4 | 1 | Carbamidomethylation | 102963 | putative translation initiation family protein [Populus trichocarpa]                            |
| 616  | 17211 | gi 224135485 | 114.94 | 10 | 5 | 1 | Carbamidomethylation | 58870  | glycosyl hydrolase family 1 family protein [Populus trichocarpa]                                |
| 1209 | 591   | gi 225456270 | 114.92 | 11 | 6 | 2 | Carbamidomethylation | 62432  | PREDICTED: nucleolar protein 56-like [Vitis vinifera]                                           |
| 615  | 17300 | gi 566213629 | 114.82 | 51 | 5 | 1 |                      | 14301  | histone H2A family protein [Populus trichocarpa]                                                |
| 752  | 17352 | gi 566156897 | 114.8  | 14 | 5 | 3 | Carbamidomethylation | 46943  | Delta-aminolevulinic acid dehydratase family protein [Populus trichocarpa]                      |
| 708  | 380   | gi 225459292 | 114.56 | 27 | 6 | 2 |                      | 28739  | PREDICTED: 14-3-3 protein 7 [Vitis vinifera]                                                    |
| 764  | 463   | gi 731398611 | 114.52 | 20 | 9 | 1 | Carbamidomethylation | 43372  | PREDICTED: proliferation-associated protein 2G4 [Vitis vinifera]                                |
| 943  | 1115  | gi 731378460 | 114.45 | 18 | 5 | 2 |                      | 38028  | PREDICTED: UDP-glucose 4-epimerase GEPI48 [Vitis vinifera]                                      |

|      |       |              |        |    |   |   |                      |        |                                                                         |
|------|-------|--------------|--------|----|---|---|----------------------|--------|-------------------------------------------------------------------------|
| 1040 | 576   | gi 91984005  | 114.42 | 18 | 4 | 4 |                      | 35318  | cytochrome f (chloroplast) [Vitis vinifera]                             |
| 1079 | 17344 | gi 224125422 | 114.33 | 8  | 5 | 3 | Carbamidomethylation | 56543  | hypothetical protein POPTR_0013s03070g [Populus trichocarpa]            |
| 1500 | 1094  | gi 225461050 | 114.31 | 15 | 5 | 5 | Carbamidomethylation | 49698  | PREDICTED: tryptophan synthase beta chain 1 [Vitis vinifera]            |
| 776  | 17757 | gi 566179485 | 114.28 | 12 | 5 | 1 | Carbamidomethylation | 41133  | alcohol-dehydrogenase family protein [Populus trichocarpa]              |
| 914  | 816   | gi 526118026 | 114.1  | 18 | 6 | 4 | Carbamidomethylation | 55487  | 5-enolpyruvylshikimate-3-phosphate synthase [Vitis vinifera]            |
| 1020 | 646   | gi 225456268 | 114.05 | 20 | 5 | 2 | Carbamidomethylation | 26974  | PREDICTED: adenylate kinase 4 [Vitis vinifera]                          |
| 977  | 812   | gi 731423236 | 114.03 | 10 | 5 | 1 |                      | 65721  | PREDICTED: monocopper oxidase-like protein SKU5 [Vitis vinifera]        |
| 1175 | 747   | gi 731409481 | 113.99 | 27 | 4 | 4 |                      | 26284  | PREDICTED: carboxymethylenebutenolidase homolog [Vitis vinifera]        |
| 1568 | 17817 | gi 566160765 | 113.8  | 12 | 5 | 1 |                      | 58378  | hypothetical protein POPTR_0003s04140g [Populus trichocarpa]            |
| 780  | 17513 | gi 225428380 | 113.74 | 10 | 6 | 5 | Carbamidomethylation | 70298  | PREDICTED: SUMO-activating enzyme subunit 2 isoform X1 [Vitis vinifera] |
| 431  | 427   | gi 731399148 | 113.68 | 50 | 6 | 6 |                      | 14802  | PREDICTED: 40S ribosomal protein S15a [Vitis vinifera]                  |
| 933  | 17873 | gi 224058705 | 113.64 | 29 | 3 | 3 | Carbamidomethylation | 18641  | cytochrome c oxidase-related family protein [Populus trichocarpa]       |
| 1331 | 716   | gi 225448823 | 113.61 | 4  | 5 | 2 |                      | 134756 | PREDICTED: splicing factor 3B subunit 3-like [Vitis vinifera]           |
| 853  | 2170  | gi 225425388 | 113.58 | 54 | 4 | 4 | Carbamidomethylation | 13594  | PREDICTED: nuclear transport factor 2 [Vitis vinifera]                  |
| 880  | 17749 | gi 566170400 | 113.51 | 10 | 4 | 1 |                      | 42882  | hypothetical protein POPTR_0005s09680g [Populus trichocarpa]            |
| 881  | 391   | gi 225425280 | 113.43 | 19 | 8 | 2 |                      | 48103  | PREDICTED: uncharacterized protein LOC100247241 [Vitis vinifera]        |

|      |       |              |        |    |   |   |                                        |        |                                                                                                        |
|------|-------|--------------|--------|----|---|---|----------------------------------------|--------|--------------------------------------------------------------------------------------------------------|
| 1644 | 17649 | gi 566186484 | 113.42 | 11 | 5 | 1 | Carbamidomethylation;<br>Oxidation (M) | 77490  | hypothetical protein<br>POPTR_0009s05730g [Populus<br>trichocarpa]                                     |
| 648  | 17449 | gi 224078584 | 113.19 | 15 | 4 | 2 |                                        | 33150  | glyoxalase I homolog family protein<br>[Populus trichocarpa]                                           |
| 1663 | 17624 | gi 224104329 | 113.1  | 8  | 4 | 1 |                                        | 96949  | alpha-glucan phosphorylase family<br>protein [Populus trichocarpa]                                     |
| 1473 | 759   | gi 731412750 | 113.1  | 10 | 4 | 4 |                                        | 62116  | PREDICTED: adenylosuccinate<br>lyase [Vitis vinifera]                                                  |
| 785  | 526   | gi 225448739 | 113.1  | 13 | 6 | 2 |                                        | 69044  | PREDICTED: leukotriene A-4<br>hydrolase homolog [Vitis vinifera]                                       |
| 1162 | 19584 | gi 566204607 | 113.02 | 13 | 6 | 3 |                                        | 52568  | hypothetical protein<br>POPTR_0014s16480g [Populus<br>trichocarpa]                                     |
| 1344 | 16899 | gi 566190691 | 112.99 | 9  | 4 | 1 | Carbamidomethylation                   | 65588  | Ser/Thr specific protein phosphatase<br>2A A regulatory subunit alpha<br>isoform [Populus trichocarpa] |
| 1443 | 18265 | gi 566189013 | 112.98 | 22 | 4 | 4 | Carbamidomethylation;<br>Oxidation (M) | 30317  | glycine-rich family protein [Populus<br>trichocarpa]                                                   |
| 1198 | 17963 | gi 224125250 | 112.97 | 7  | 5 | 5 | Carbamidomethylation                   | 110348 | glycoside hydrolase family 2 family<br>protein [Populus trichocarpa]                                   |
| 685  | 17341 | gi 566238007 | 112.96 | 12 | 3 | 1 | Carbamidomethylation                   | 30925  | Chlorophyll a-b binding protein<br>CP26 [Populus trichocarpa]                                          |
| 921  | 687   | gi 359490482 | 112.74 | 18 | 5 | 2 | Carbamidomethylation                   | 33398  | PREDICTED: probable mediator of<br>RNA polymerase II transcription<br>subunit 36b [Vitis vinifera]     |
| 897  | 1376  | gi 225438619 | 112.64 | 36 | 4 | 1 | Carbamidomethylation                   | 12309  | PREDICTED: 60S ribosomal protein<br>L30 [Vitis vinifera]                                               |
| 1292 | 17738 | gi 224066507 | 112.64 | 13 | 6 | 1 | Carbamidomethylation                   | 43683  | mRNA-binding family protein<br>[Populus trichocarpa]                                                   |
| 618  | 927   | gi 731440185 | 112.63 | 13 | 4 | 2 |                                        | 30189  | PREDICTED: 60S ribosomal protein<br>L5-like [Vitis vinifera]                                           |
| 1495 | 957   | gi 731389741 | 112.53 | 9  | 5 | 1 | Carbamidomethylation                   | 69804  | PREDICTED: probable<br>methyltransferase PMT3 [Vitis<br>vinifera]                                      |
| 1779 | 17786 | gi 566209837 | 112.49 | 14 | 5 | 2 | Carbamidomethylation                   | 54725  | Signal recognition particle 54 kDa<br>protein 1 [Populus trichocarpa]                                  |
| 1516 | 28886 | gi 224113185 | 112.48 | 13 | 5 | 1 | Carbamidomethylation                   | 57926  | hypothetical protein<br>POPTR_0010s23940g [Populus<br>trichocarpa]                                     |

|      |       |              |        |    |   |   |                      |        |                                                                                                                                       |
|------|-------|--------------|--------|----|---|---|----------------------|--------|---------------------------------------------------------------------------------------------------------------------------------------|
| 930  | 17374 | gi 566147333 | 112.48 | 5  | 5 | 3 |                      | 100058 | hypothetical protein POPTR_0001s05320g [Populus trichocarpa]                                                                          |
| 1041 | 1487  | gi 225460716 | 112.37 | 10 | 4 | 2 |                      | 49588  | PREDICTED: dihydrolipoyllysine-residue acetyltransferase component 5 of pyruvate dehydrogenase complex chloroplastic [Vitis vinifera] |
| 761  | 774   | gi 225444063 | 112.34 | 13 | 5 | 2 | Carbamidomethylation | 44423  | PREDICTED: obg-like ATPase 1 [Vitis vinifera]                                                                                         |
| 1288 | 499   | gi 731416612 | 112.33 | 12 | 5 | 5 |                      | 63619  | PREDICTED: probable nucleolar protein 5-2 [Vitis vinifera]                                                                            |
| 1342 | 1205  | gi 225443286 | 112.23 | 11 | 4 | 2 | Carbamidomethylation | 43933  | PREDICTED: pyruvate dehydrogenase E1 component subunit alpha mitochondrial [Vitis vinifera]                                           |
| 1222 | 325   | gi 225456051 | 112.12 | 9  | 4 | 2 | Carbamidomethylation | 57589  | PREDICTED: T-complex protein 1 subunit delta [Vitis vinifera]                                                                         |
| 1365 | 907   | gi 731395413 | 112.06 | 18 | 4 | 3 | Carbamidomethylation | 31798  | PREDICTED: bifunctional protein FoLD 2 [Vitis vinifera]                                                                               |
| 842  | 729   | gi 731421236 | 112.04 | 17 | 6 | 2 | Carbamidomethylation | 37446  | PREDICTED: arginase 1 mitochondrial [Vitis vinifera]                                                                                  |
| 955  | 18534 | gi 224063774 | 112.02 | 13 | 6 | 4 | Carbamidomethylation | 55604  | 3-phosphoshikimate 1-carboxyvinyltransferase family protein [Populus trichocarpa]                                                     |
| 1115 | 17785 | gi 566149444 | 111.86 | 13 | 6 | 6 |                      | 54813  | aldehyde dehydrogenase family 7 member a1 turgor responsive family protein [Populus trichocarpa]                                      |
| 1312 | 1156  | gi 225436289 | 111.68 | 22 | 5 | 1 | Oxidation (M)        | 43082  | PREDICTED: probable aldo-keto reductase 2 isoform X1 [Vitis vinifera]                                                                 |
| 1064 | 17196 | gi 224121218 | 111.61 | 18 | 5 | 1 | Carbamidomethylation | 36046  | GTP-binding protein beta chain [Populus trichocarpa]                                                                                  |
| 1226 | 1310  | gi 731401385 | 111.61 | 7  | 3 | 3 |                      | 36064  | PREDICTED: uncharacterized protein At5g02240 [Vitis vinifera]                                                                         |
| 1278 | 18379 | gi 566182095 | 111.48 | 15 | 6 | 2 | Carbamidomethylation | 48288  | hypothetical protein POPTR_0008s03160g [Populus trichocarpa]                                                                          |

|      |       |              |        |    |   |   |                                     |        |                                                                                                              |
|------|-------|--------------|--------|----|---|---|-------------------------------------|--------|--------------------------------------------------------------------------------------------------------------|
| 1768 | 735   | gi 225455902 | 111.39 | 8  | 3 | 2 | Carbamidomethylation                | 65334  | PREDICTED: serine/threonine-protein phosphatase 2A 65 kDa regulatory subunit A beta isoform [Vitis vinifera] |
| 965  | 1215  | gi 225462161 | 111.38 | 12 | 4 | 4 | Carbamidomethylation                | 53484  | PREDICTED: NADH dehydrogenase [ubiquinone] flavoprotein 1 mitochondrial isoform X2 [Vitis vinifera]          |
| 1609 | 19577 | gi 224089368 | 111.35 | 7  | 3 | 1 |                                     | 73326  | endomembrane protein 70 [Populus trichocarpa]                                                                |
| 1104 | 17882 | gi 566163268 | 111.23 | 35 | 5 | 1 | Carbamidomethylation                | 14720  | hypothetical protein POPTR_0003s17960g [Populus trichocarpa]                                                 |
| 755  | 710   | gi 731382436 | 111.14 | 18 | 4 | 1 |                                     | 35672  | PREDICTED: LOW QUALITY PROTEIN: isoflavone reductase-like protein [Vitis vinifera]                           |
| 1414 | 18242 | gi 566214941 | 111.12 | 8  | 7 | 2 | Carbamidomethylation                | 107829 | elongation factor Ts family protein [Populus trichocarpa]                                                    |
| 827  | 17620 | gi 224058427 | 111.04 | 15 | 5 | 2 |                                     | 28418  | reticulon family protein [Populus trichocarpa]                                                               |
| 992  | 809   | gi 225445206 | 110.95 | 18 | 6 | 1 | Carbamidomethylation                | 45116  | PREDICTED: aspartate aminotransferase cytoplasmic [Vitis vinifera]                                           |
| 1604 | 17821 | gi 566182683 | 110.94 | 17 | 4 | 4 |                                     | 34990  | hypothetical protein POPTR_0008s06540g [Populus trichocarpa]                                                 |
| 1289 | 17577 | gi 566188043 | 110.87 | 21 | 5 | 1 | Oxidation (M)                       | 43097  | hypothetical protein POPTR_0009s14830g [Populus trichocarpa]                                                 |
| 1159 | 17715 | gi 566158632 | 110.83 | 15 | 5 | 1 | Carbamidomethylation; Oxidation (M) | 48694  | hypothetical protein POPTR_0002s18020g [Populus trichocarpa]                                                 |
| 850  | 787   | gi 225450299 | 110.81 | 11 | 5 | 5 |                                     | 52389  | PREDICTED: citrate synthase mitochondrial [Vitis vinifera]                                                   |
| 768  | 1297  | gi 359489218 | 110.77 | 6  | 3 | 3 | Carbamidomethylation                | 90315  | PREDICTED: nucleolin [Vitis vinifera]                                                                        |
| 924  | 17954 | gi 224115436 | 110.77 | 26 | 5 | 1 |                                     | 21917  | GA family protein [Populus trichocarpa]                                                                      |

|      |       |              |        |    |   |   |                      |        |                                                                       |
|------|-------|--------------|--------|----|---|---|----------------------|--------|-----------------------------------------------------------------------|
| 1426 | 17767 | gi 566157737 | 110.73 | 7  | 5 | 3 | Carbamidomethylation | 79950  | hypothetical protein POPTR_0002s13010g [Populus trichocarpa]          |
| 1235 | 17431 | gi 566176019 | 110.43 | 19 | 5 | 1 |                      | 39252  | isocitrate dehydrogenase family protein [Populus trichocarpa]         |
| 1293 | 17458 | gi 224105455 | 110.43 | 10 | 4 | 3 | Carbamidomethylation | 51957  | chloroplast biogenesis family protein [Populus trichocarpa]           |
| 1118 | 605   | gi 731399856 | 110.34 | 4  | 3 | 1 |                      | 104341 | PREDICTED: villin-2 [Vitis vinifera]                                  |
| 1063 | 662   | gi 225447135 | 110.34 | 55 | 5 | 2 | Carbamidomethylation | 11288  | PREDICTED: small ubiquitin-related modifier 1 [Vitis vinifera]        |
| 1307 | 1325  | gi 731411781 | 110.29 | 14 | 4 | 4 |                      | 25284  | PREDICTED: manganese superoxide dismutase isoform X1 [Vitis vinifera] |
| 1091 | 17240 | gi 566202791 | 110.12 | 11 | 5 | 4 | Carbamidomethylation | 59276  | t-complex polypeptide 1 family protein [Populus trichocarpa]          |
| 1505 | 28906 | gi 731410313 | 110    | 9  | 5 | 2 |                      | 75856  | PREDICTED: transmembrane 9 superfamily member 12 [Vitis vinifera]     |
| 590  | 17412 | gi 566189935 | 109.78 | 11 | 4 | 1 | Carbamidomethylation | 29602  | ribosomal protein S3a [Populus trichocarpa]                           |
| 1101 | 17901 | gi 566170058 | 109.77 | 10 | 6 | 6 | Carbamidomethylation | 65727  | hypothetical protein POPTR_0005s07720g [Populus trichocarpa]          |
| 793  | 718   | gi 225465809 | 109.62 | 24 | 6 | 2 | Carbamidomethylation | 20492  | PREDICTED: peptidyl-prolyl cis-trans isomerase CYP22 [Vitis vinifera] |
| 862  | 769   | gi 359488553 | 109.57 | 5  | 5 | 1 |                      | 115409 | PREDICTED: alpha-mannosidase isoform X2 [Vitis vinifera]              |
| 968  | 17557 | gi 566168605 | 109.53 | 13 | 5 | 1 |                      | 44259  | hypothetical protein POPTR_0005s00670g [Populus trichocarpa]          |
| 459  | 17575 | gi 566170929 | 109.48 | 10 | 3 | 1 | Carbamidomethylation | 36394  | hypothetical protein POPTR_0005s12070g [Populus trichocarpa]          |
| 961  | 975   | gi 359494701 | 109.35 | 9  | 6 | 1 | Oxidation (M)        | 91552  | PREDICTED: dynamin-related protein 3B isoform X1 [Vitis vinifera]     |

|      |       |              |        |    |   |   |                      |        |                                                                                     |
|------|-------|--------------|--------|----|---|---|----------------------|--------|-------------------------------------------------------------------------------------|
| 1544 | 18314 | gi 224088282 | 109.19 | 7  | 3 | 1 |                      | 73935  | hypothetical protein POPTR_0006s19780g [Populus trichocarpa]                        |
| 1353 | 1838  | gi 225440564 | 109.12 | 11 | 3 | 3 |                      | 44667  | PREDICTED: fructose-1 6-bisphosphatase chloroplastic-like [Vitis vinifera]          |
| 1131 | 1086  | gi 731399561 | 108.93 | 3  | 5 | 4 |                      | 187436 | PREDICTED: transcription elongation factor SPT6 [Vitis vinifera]                    |
| 138  | 955   | gi 225465423 | 108.9  | 8  | 5 | 4 | Carbamidomethylation | 53142  | PREDICTED: uncharacterized protein LOC100251726 [Vitis vinifera]                    |
| 789  | 336   | gi 225429870 | 108.88 | 15 | 8 | 8 | Carbamidomethylation | 60861  | PREDICTED: aspartate--tRNA ligase cytoplasmic [Vitis vinifera]                      |
| 737  | 17164 | gi 566147610 | 108.83 | 24 | 6 | 1 |                      | 20417  | hypothetical protein POPTR_0001s06720g [Populus trichocarpa]                        |
| 887  | 17242 | gi 566182348 | 108.82 | 13 | 6 | 2 | Carbamidomethylation | 70505  | peptidase M1 family protein [Populus trichocarpa]                                   |
| 1286 | 1064  | gi 225462285 | 108.81 | 15 | 7 | 3 |                      | 52600  | PREDICTED: inosine-5'-monophosphate dehydrogenase [Vitis vinifera]                  |
| 453  | 878   | gi 225452827 | 108.78 | 34 | 5 | 5 |                      | 13746  | PREDICTED: 60S ribosomal protein L34 [Vitis vinifera]                               |
| 1156 | 17408 | gi 566192263 | 108.72 | 17 | 6 | 6 |                      | 47039  | chorismate synthase family protein [Populus trichocarpa]                            |
| 719  | 633   | gi 225444649 | 108.61 | 13 | 3 | 3 |                      | 26396  | PREDICTED: 20 kDa chaperonin chloroplastic [Vitis vinifera]                         |
| 971  | 1305  | gi 225451833 | 108.6  | 19 | 5 | 1 |                      | 29200  | PREDICTED: 60S ribosomal protein L7a [Vitis vinifera]                               |
| 997  | 17124 | gi 566259876 | 108.58 | 24 | 5 | 1 |                      | 23976  | hypothetical protein POPTR_0022s00350g [Populus trichocarpa]                        |
| 1108 | 16945 | gi 224090986 | 108.58 | 20 | 5 | 4 | Carbamidomethylation | 31176  | chlorophyll a/b binding protein CP29 [Populus trichocarpa]                          |
| 1127 | 17927 | gi 566171321 | 108.57 | 17 | 4 | 1 |                      | 33667  | pfkB-type carbohydrate kinase family protein [Populus trichocarpa]                  |
| 948  | 794   | gi 731374652 | 108.57 | 12 | 5 | 2 |                      | 58335  | PREDICTED: aldehyde dehydrogenase family 2 member B4 mitochondrial [Vitis vinifera] |



|      |       |              |        |    |   |   |                                     |        |                                                                                               |
|------|-------|--------------|--------|----|---|---|-------------------------------------|--------|-----------------------------------------------------------------------------------------------|
| 1178 | 18655 | gi 566163024 | 108.37 | 12 | 3 | 1 |                                     | 39970  | hypothetical protein POPTR_0003s16480g [Populus trichocarpa]                                  |
| 1406 | 17463 | gi 224133304 | 108.25 | 12 | 6 | 6 | Carbamidomethylation                | 60007  | hypothetical protein POPTR_0015s07690g [Populus trichocarpa]                                  |
| 791  | 16841 | gi 669099987 | 108.21 | 9  | 8 | 7 | Carbamidomethylation                | 83116  | photosystem I P700 chlorophyll A apoprotein A1 (chloroplast) [Camellia crapnelliana]          |
| 1683 | 1982  | gi 731402641 | 108.04 | 21 | 4 | 2 |                                     | 35414  | PREDICTED: cytochrome c1-2 heme protein mitochondrial-like isoform X3 [Vitis vinifera]        |
| 1034 | 17567 | gi 224071575 | 108.02 | 10 | 5 | 2 | Carbamidomethylation                | 65504  | stress inducible family protein [Populus trichocarpa]                                         |
| 1215 | 18056 | gi 224089509 | 108    | 26 | 4 | 4 |                                     | 23148  | hypothetical protein POPTR_0006s00360g [Populus trichocarpa]                                  |
| 1279 | 3000  | gi 225453620 | 107.95 | 16 | 5 | 1 | Carbamidomethylation; Oxidation (M) | 47761  | PREDICTED: pyruvate dehydrogenase E1 component subunit alpha-3 chloroplastic [Vitis vinifera] |
| 935  | 18315 | gi 566200085 | 107.93 | 5  | 5 | 1 | Carbamidomethylation                | 125013 | hypothetical protein POPTR_0013s08030g [Populus trichocarpa]                                  |
| 703  | 1103  | gi 731398322 | 107.88 | 10 | 6 | 1 | Carbamidomethylation                | 68750  | PREDICTED: lysosomal beta glucosidase-like isoform X2 [Vitis vinifera]                        |
| 1674 | 18050 | gi 566187644 | 107.8  | 8  | 5 | 1 | Carbamidomethylation                | 91239  | hypothetical protein POPTR_0009s12440g [Populus trichocarpa]                                  |
| 1346 | 17381 | gi 566198861 | 107.74 | 24 | 6 | 5 | Carbamidomethylation                | 29461  | hypothetical protein POPTR_0013s01700g [Populus trichocarpa]                                  |
| 1427 | 986   | gi 225440013 | 107.7  | 18 | 5 | 2 |                                     | 40309  | PREDICTED: isocitrate dehydrogenase [NAD] catalytic subunit 5 mitochondrial [Vitis vinifera]  |
| 503  | 784   | gi 225462809 | 107.58 | 8  | 4 | 4 |                                     | 60994  | PREDICTED: 2-hydroxyacyl-CoA lyase [Vitis vinifera]                                           |

|      |       |              |        |    |   |   |                      |        |                                                                                                |
|------|-------|--------------|--------|----|---|---|----------------------|--------|------------------------------------------------------------------------------------------------|
| 1444 | 1903  | gi 225440898 | 107.51 | 13 | 4 | 1 |                      | 51575  | PREDICTED: cell division protein FtsZ homolog 2-1 chloroplastic [Vitis vinifera]               |
| 1621 | 17504 | gi 224062301 | 107.34 | 16 | 4 | 1 | Carbamidomethylation | 38139  | hypothetical protein POPTR_0002s04790g [Populus trichocarpa]                                   |
| 1743 | 952   | gi 225438095 | 107.17 | 9  | 5 | 1 | Carbamidomethylation | 70388  | PREDICTED: probable methyltransferase PMT8 [Vitis vinifera]                                    |
| 1003 | 18658 | gi 224117530 | 107.1  | 14 | 3 | 1 |                      | 21810  | endoribonuclease L-PSP family protein [Populus trichocarpa]                                    |
| 1039 | 17574 | gi 566178300 | 106.94 | 13 | 6 | 2 | Carbamidomethylation | 45519  | hypothetical protein POPTR_0006s26630g [Populus trichocarpa]                                   |
| 979  | 17819 | gi 224131818 | 106.91 | 24 | 4 | 1 |                      | 28513  | chlorophyll a/b-binding family protein [Populus trichocarpa]                                   |
| 916  | 913   | gi 225425595 | 106.89 | 12 | 4 | 1 | Carbamidomethylation | 46628  | PREDICTED: ATP-citrate synthase alpha chain protein 1 [Vitis vinifera]                         |
| 1359 | 1127  | gi 731397334 | 106.84 | 8  | 4 | 3 |                      | 73259  | PREDICTED: apoptotic chromatin condensation inducer in the nucleus isoform X2 [Vitis vinifera] |
| 1214 | 17231 | gi 224087752 | 106.81 | 13 | 4 | 4 | Carbamidomethylation | 33055  | pyridoxin biosynthesis PDX1-like protein 3 [Populus trichocarpa]                               |
| 1117 | 1159  | gi 225432366 | 106.72 | 5  | 5 | 5 |                      | 125073 | PREDICTED: putative chromatin-remodeling complex ATPase chain [Vitis vinifera]                 |
| 1200 | 17475 | gi 224107361 | 106.63 | 5  | 6 | 1 |                      | 128813 | ADP-forming family protein [Populus trichocarpa]                                               |
| 1433 | 2484  | gi 225465947 | 106.53 | 7  | 3 | 3 |                      | 52209  | PREDICTED: uridine 5'-monophosphate synthase [Vitis vinifera]                                  |
| 1369 | 2050  | gi 731393849 | 106.44 | 6  | 4 | 3 | Carbamidomethylation | 56128  | PREDICTED: UBP1-associated protein 2A [Vitis vinifera]                                         |
| 1184 | 18199 | gi 566185810 | 106.4  | 6  | 5 | 1 |                      | 94037  | beta-galactosidase family protein [Populus trichocarpa]                                        |
| 1264 | 1237  | gi 225446509 | 106.4  | 7  | 4 | 3 | Carbamidomethylation | 77096  | PREDICTED: acyl-coenzyme A oxidase 3 peroxisomal [Vitis vinifera]                              |

|      |       |              |        |    |   |   |                      |       |                                                                                                                                                       |
|------|-------|--------------|--------|----|---|---|----------------------|-------|-------------------------------------------------------------------------------------------------------------------------------------------------------|
| 1152 | 17996 | gi 566203263 | 106.39 | 6  | 5 | 5 |                      | 91348 | hypothetical protein POPTR_0014s08590g [Populus trichocarpa]                                                                                          |
| 1373 | 17911 | gi 566203837 | 106.18 | 8  | 3 | 3 |                      | 39770 | DNAJ heat shock family protein [Populus trichocarpa]                                                                                                  |
| 966  | 1238  | gi 225425166 | 106.12 | 12 | 3 | 1 |                      | 39489 | PREDICTED: pyruvate dehydrogenase E1 component subunit beta-1 mitochondrial [Vitis vinifera]                                                          |
| 797  | 17869 | gi 566168995 | 106.1  | 22 | 3 | 1 |                      | 19031 | callus protein P23 [Populus trichocarpa]                                                                                                              |
| 903  | 430   | gi 731386341 | 106.06 | 9  | 6 | 1 | Carbamidomethylation | 74377 | PREDICTED: trifunctional UDP-glucose 4 6-dehydratase/UDP-4-keto-6-deoxy-D-glucose 3 5-epimerase/UDP-4-keto-L-rhamnose-reductase RHM1 [Vitis vinifera] |
| 1429 | 1174  | gi 225426166 | 106.05 | 16 | 5 | 2 | Carbamidomethylation | 42682 | PREDICTED: mitogen-activated protein kinase homolog MMK2 [Vitis vinifera]                                                                             |
| 1757 | 1742  | gi 731436287 | 106.03 | 4  | 3 | 3 | Carbamidomethylation | 96261 | PREDICTED: histidine--tRNA ligase [Vitis vinifera]                                                                                                    |
| 801  | 17266 | gi 224104631 | 106.02 | 21 | 6 | 1 |                      | 27319 | cytosolic ascorbate peroxidase family protein [Populus trichocarpa]                                                                                   |
| 1186 | 1106  | gi 225435632 | 105.95 | 7  | 5 | 1 | Carbamidomethylation | 67979 | PREDICTED: formate--tetrahydrofolate ligase [Vitis vinifera]                                                                                          |
| 1724 | 1234  | gi 731390743 | 105.95 | 15 | 4 | 1 |                      | 40016 | PREDICTED: PTI1-like tyrosine-protein kinase 3 isoform X2 [Vitis vinifera]                                                                            |
| 1001 | 1605  | gi 225460977 | 105.93 | 17 | 4 | 2 | Carbamidomethylation | 20368 | PREDICTED: reactive Intermediate Deaminase A chloroplastic [Vitis vinifera]                                                                           |
| 1135 | 18650 | gi 566159091 | 105.8  | 24 | 4 | 1 | Carbamidomethylation | 20543 | hypothetical protein POPTR_0002s20400g [Populus trichocarpa]                                                                                          |
| 1306 | 813   | gi 225425356 | 105.73 | 15 | 4 | 4 |                      | 32651 | PREDICTED: U2 small nuclear ribonucleoprotein A' [Vitis vinifera]                                                                                     |
| 1243 | 17916 | gi 566182153 | 105.66 | 9  | 3 | 3 | Carbamidomethylation | 57417 | Serine carboxypeptidase precursor family protein [Populus trichocarpa]                                                                                |

|      |       |              |        |    |   |   |                      |       |                                                                           |
|------|-------|--------------|--------|----|---|---|----------------------|-------|---------------------------------------------------------------------------|
| 1157 | 17332 | gi 566165023 | 105.57 | 11 | 6 | 3 | Carbamidomethylation | 60040 | hypothetical protein POPTR_0004s05160g [Populus trichocarpa]              |
| 995  | 18399 | gi 566174518 | 105.5  | 9  | 2 | 1 | Carbamidomethylation | 40168 | hypothetical protein POPTR_0006s04880g [Populus trichocarpa]              |
| 1217 | 1290  | gi 225453909 | 105.38 | 17 | 3 | 3 | Carbamidomethylation | 24628 | PREDICTED: proteasome subunit beta type-1 [Vitis vinifera]                |
| 1341 | 17514 | gi 566170365 | 105.28 | 12 | 4 | 2 | Carbamidomethylation | 39182 | hypothetical protein POPTR_0005s09400g partial [Populus trichocarpa]      |
| 1645 | 856   | gi 225454422 | 105.18 | 28 | 4 | 4 |                      | 16418 | PREDICTED: eukaryotic translation initiation factor 1A [Vitis vinifera]   |
| 1212 | 1387  | gi 225427288 | 105.14 | 10 | 5 | 1 |                      | 68795 | PREDICTED: dynamin-related protein 1E [Vitis vinifera]                    |
| 1474 | 18307 | gi 224113315 | 105.08 | 9  | 6 | 1 |                      | 66874 | hypothetical protein POPTR_0010s25600g [Populus trichocarpa]              |
| 667  | 807   | gi 225461209 | 104.89 | 23 | 4 | 2 |                      | 21740 | PREDICTED: NAD(P)H dehydrogenase (quinone) FQR1 [Vitis vinifera]          |
| 1582 | 577   | gi 731438110 | 104.83 | 6  | 4 | 4 |                      | 88481 | PREDICTED: probable cytosolic oligopeptidase A [Vitis vinifera]           |
| 1833 | 1979  | gi 731436817 | 104.82 | 12 | 5 | 5 |                      | 49774 | PREDICTED: cysteine desulfurase 1 mitochondrial-like [Vitis vinifera]     |
| 956  | 17598 | gi 566158065 | 104.75 | 12 | 5 | 1 |                      | 37108 | arginase family protein [Populus trichocarpa]                             |
| 1415 | 17782 | gi 224143559 | 104.7  | 14 | 5 | 1 | Carbamidomethylation | 44475 | aspartate aminotransferase family protein [Populus trichocarpa]           |
| 1176 | 19132 | gi 224073194 | 104.58 | 7  | 5 | 1 | Carbamidomethylation | 67506 | 10-formyltetrahydrofolate synthetase family protein [Populus trichocarpa] |
| 1782 | 18332 | gi 224107655 | 104.53 | 16 | 3 | 1 |                      | 33896 | 3-oxoacyl-[acyl-carrier-protein] reductase [Populus trichocarpa]          |
| 1452 | 17990 | gi 224072588 | 104.52 | 12 | 4 | 4 | Carbamidomethylation | 30737 | hypothetical protein POPTR_0003s17100g partial [Populus trichocarpa]      |
| 1416 | 17448 | gi 566149991 | 104.46 | 11 | 5 | 1 | Carbamidomethylation | 47475 | hypothetical protein POPTR_0001s20510g [Populus trichocarpa]              |

|      |       |              |        |    |   |   |                                     |       |                                                                                           |
|------|-------|--------------|--------|----|---|---|-------------------------------------|-------|-------------------------------------------------------------------------------------------|
| 1596 | 17500 | gi 224107863 | 104.45 | 11 | 4 | 2 |                                     | 43257 | pyruvate dehydrogenase family protein [Populus trichocarpa]                               |
| 1501 | 1158  | gi 225462270 | 104.37 | 20 | 5 | 5 | Carbamidomethylation                | 31886 | PREDICTED: 2-dehydro-3-deoxyphosphooctonate aldolase [Vitis vinifera]                     |
| 1385 | 1541  | gi 225453754 | 103.91 | 15 | 2 | 2 | Carbamidomethylation                | 23373 | PREDICTED: probable xyloglucan endotransglucosylase/hydrolase protein 19 [Vitis vinifera] |
| 1086 | 781   | gi 225436672 | 103.83 | 8  | 4 | 1 | Carbamidomethylation                | 56836 | PREDICTED: flavonoid 3' 5'-hydroxylase 2 [Vitis vinifera]                                 |
| 683  | 675   | gi 225442801 | 103.81 | 51 | 5 | 1 |                                     | 14493 | PREDICTED: probable histone H2A variant 3 [Vitis vinifera]                                |
| 1011 | 811   | gi 225456404 | 103.71 | 9  | 3 | 1 | Carbamidomethylation                | 50437 | PREDICTED: glutamate-1-semialdehyde 2 1-aminomutase chloroplastic [Vitis vinifera]        |
| 1407 | 28873 | gi 566186314 | 103.68 | 10 | 6 | 5 | Carbamidomethylation                | 70914 | hypothetical protein POPTR_0009s04780g [Populus trichocarpa]                              |
| 1576 | 2154  | gi 225458519 | 103.56 | 5  | 3 | 1 | Carbamidomethylation                | 75018 | PREDICTED: uncharacterized protein LOC100267853 [Vitis vinifera]                          |
| 1730 | 854   | gi 731402959 | 103.52 | 11 | 3 | 1 |                                     | 35210 | PREDICTED: probable quinone oxidoreductase [Vitis vinifera]                               |
| 699  | 17320 | gi 566189392 | 103.24 | 18 | 6 | 6 |                                     | 27258 | hypothetical protein POPTR_0010s06320g [Populus trichocarpa]                              |
| 1230 | 18027 | gi 566197725 | 103.14 | 8  | 3 | 1 |                                     | 56765 | hypothetical protein POPTR_0012s10030g [Populus trichocarpa]                              |
| 1673 | 17804 | gi 566168414 | 103.13 | 13 | 3 | 1 |                                     | 34495 | quinone oxidoreductase-like family protein [Populus trichocarpa]                          |
| 1090 | 17447 | gi 566185959 | 103.08 | 23 | 6 | 1 | Carbamidomethylation; Oxidation (M) | 27367 | Proteasome subunit alpha type 3 family protein [Populus trichocarpa]                      |
| 1729 | 2586  | gi 225431100 | 102.97 | 10 | 3 | 3 | Carbamidomethylation                | 42836 | PREDICTED: 26S proteasome non-ATPase regulatory subunit 4 homolog [Vitis vinifera]        |
| 686  | 867   | gi 225451645 | 102.94 | 44 | 3 | 3 | Carbamidomethylation                | 9595  | PREDICTED: 40S ribosomal protein S27-2-like [Vitis vinifera]                              |
| 1567 | 17508 | gi 566212181 | 102.82 | 6  | 4 | 1 | Carbamidomethylation                | 90000 | methionyl-tRNA synthetase family protein [Populus trichocarpa]                            |

|      |       |              |        |    |   |   |                      |        |                                                                                               |
|------|-------|--------------|--------|----|---|---|----------------------|--------|-----------------------------------------------------------------------------------------------|
| 1496 | 848   | gi 225427017 | 102.77 | 14 | 5 | 5 |                      | 37604  | PREDICTED: L-lactate dehydrogenase A isoform X2 [Vitis vinifera]                              |
| 1007 | 16954 | gi 224076908 | 102.63 | 16 | 6 | 1 |                      | 40750  | hypothetical protein POPTR_0004s06400g [Populus trichocarpa]                                  |
| 283  | 987   | gi 731411833 | 102.44 | 14 | 3 | 2 | Carbamidomethylation | 35859  | PREDICTED: nitrilase-like protein 2 [Vitis vinifera]                                          |
| 1237 | 746   | gi 225447041 | 102.36 | 6  | 3 | 1 | Carbamidomethylation | 60008  | PREDICTED: L-ascorbate oxidase homolog [Vitis vinifera]                                       |
| 972  | 17585 | gi 224133188 | 102.32 | 19 | 5 | 2 | Carbamidomethylation | 35890  | GTP-binding protein beta chain [Populus trichocarpa]                                          |
| 910  | 1369  | gi 526117665 | 102.21 | 12 | 4 | 1 | Carbamidomethylation | 41194  | alcohol dehydrogenase 2 [Vitis vinifera]                                                      |
| 1598 | 1135  | gi 225458305 | 102.07 | 9  | 4 | 3 |                      | 62648  | PREDICTED: glucose-6-phosphate isomerase cytosolic [Vitis vinifera]                           |
| 804  | 1281  | gi 359494275 | 102.03 | 13 | 5 | 1 | Carbamidomethylation | 25431  | PREDICTED: probable glutathione S-transferase parC [Vitis vinifera]                           |
| 1167 | 18339 | gi 225462348 | 102.01 | 8  | 3 | 3 | Carbamidomethylation | 57728  | PREDICTED: zinc finger CCCH domain-containing protein 37 isoform X2 [Vitis vinifera]          |
| 1195 | 1179  | gi 225437618 | 102    | 5  | 2 | 2 | Carbamidomethylation | 82698  | PREDICTED: probable pre-mRNA-splicing factor ATP-dependent RNA helicase [Vitis vinifera]      |
| 1242 | 18064 | gi 566149112 | 102    | 20 | 4 | 2 | Carbamidomethylation | 22610  | GTP-binding family protein [Populus trichocarpa]                                              |
| 1586 | 1415  | gi 225437227 | 101.96 | 10 | 5 | 5 |                      | 60053  | PREDICTED: glutathione reductase chloroplastic [Vitis vinifera]                               |
| 1575 | 805   | gi 225432846 | 101.95 | 18 | 4 | 1 | Carbamidomethylation | 38533  | PREDICTED: 2-methyl-6-phytyl-14-hydroquinone methyltransferase chloroplastic [Vitis vinifera] |
| 1402 | 2892  | gi 359474491 | 101.93 | 4  | 4 | 4 | Carbamidomethylation | 138987 | PREDICTED: regulator of nonsense transcripts 1 homolog isoform X2 [Vitis vinifera]            |
| 1946 | 2190  | gi 225442910 | 101.92 | 11 | 4 | 1 | Carbamidomethylation | 55294  | PREDICTED: signal recognition particle 54 kDa protein 2 [Vitis vinifera]                      |
| 750  | 1639  | gi 526118028 | 101.91 | 16 | 6 | 3 |                      | 30741  | aquaporin-like [Vitis vinifera]                                                               |
| 1270 | 18130 | gi 566160621 | 101.89 | 13 | 5 | 4 |                      | 55240  | DEAD box RNA helicase family protein [Populus trichocarpa]                                    |

|      |       |              |        |    |   |   |                      |       |                                                                                                                                               |
|------|-------|--------------|--------|----|---|---|----------------------|-------|-----------------------------------------------------------------------------------------------------------------------------------------------|
| 1102 | 537   | gi 225465200 | 101.81 | 25 | 5 | 1 |                      | 23863 | PREDICTED: ras-related protein RABA2a [Vitis vinifera]                                                                                        |
| 1502 | 28880 | gi 225462066 | 101.78 | 12 | 4 | 1 |                      | 45076 | PREDICTED: DNA damage-inducible protein 1 [Vitis vinifera]                                                                                    |
| 560  | 17506 | gi 566243399 | 101.65 | 13 | 4 | 1 |                      | 33846 | hypothetical protein POPTR_0019s13040g [Populus trichocarpa]                                                                                  |
| 962  | 17523 | gi 224107106 | 101.64 | 9  | 6 | 1 | Carbamidomethylation | 79571 | MULTIFUNCTIONAL family protein [Populus trichocarpa]                                                                                          |
| 975  | 17759 | gi 224107999 | 101.61 | 31 | 6 | 1 |                      | 23112 | Proteasome subunit beta type 2-2 family protein [Populus trichocarpa]                                                                         |
| 976  | 887   | gi 359479647 | 101.5  | 27 | 6 | 1 |                      | 22491 | PREDICTED: proteasome subunit beta type-2-A [Vitis vinifera]                                                                                  |
| 1535 | 1573  | gi 731428130 | 101.34 | 10 | 3 | 1 |                      | 49925 | PREDICTED: kynurenine--oxoglutarate transaminase 1 [Vitis vinifera]                                                                           |
| 1216 | 1864  | gi 731404286 | 101.31 | 10 | 4 | 4 |                      | 51076 | PREDICTED: dihydrolipoyllysine-residue succinyltransferase component of 2-oxoglutarate dehydrogenase complex 1 mitochondrial [Vitis vinifera] |
| 1506 | 1989  | gi 731417792 | 101.29 | 6  | 3 | 3 | Carbamidomethylation | 72111 | PREDICTED: KH domain-containing protein At4g18375 [Vitis vinifera]                                                                            |
| 1132 | 17511 | gi 566203118 | 101.2  | 25 | 7 | 7 | Carbamidomethylation | 27871 | phosphomannomutase family protein [Populus trichocarpa]                                                                                       |
| 1508 | 1593  | gi 359497369 | 101.17 | 7  | 3 | 3 | Carbamidomethylation | 64520 | PREDICTED: eukaryotic translation initiation factor 3 subunit D-like [Vitis vinifera]                                                         |
| 1142 | 17694 | gi 224059670 | 101.06 | 19 | 4 | 2 |                      | 25980 | 60S ribosomal protein L6 [Populus trichocarpa]                                                                                                |
| 411  | 17645 | gi 566146919 | 101.05 | 7  | 5 | 1 |                      | 68964 | hypothetical protein POPTR_0001s03040g [Populus trichocarpa]                                                                                  |
| 1503 | 18083 | gi 566159452 | 101.02 | 9  | 4 | 1 |                      | 75110 | hypothetical protein POPTR_0002s22560g [Populus trichocarpa]                                                                                  |
| 1314 | 17589 | gi 224055291 | 101.01 | 8  | 4 | 1 |                      | 56959 | hypothetical protein POPTR_0001s28140g [Populus trichocarpa]                                                                                  |

|      |       |              |        |    |   |   |                      |        |                                                                                 |
|------|-------|--------------|--------|----|---|---|----------------------|--------|---------------------------------------------------------------------------------|
| 1442 | 17614 | gi 224054837 | 100.97 | 23 | 5 | 3 | Carbamidomethylation | 23819  | hypothetical protein POPTR_0001s24290g [Populus trichocarpa]                    |
| 1056 | 423   | gi 225434133 | 100.94 | 15 | 5 | 2 | Carbamidomethylation | 40613  | PREDICTED: cysteine synthase chloroplastic/chromoplastic [Vitis vinifera]       |
| 1534 | 864   | gi 731439997 | 100.5  | 15 | 5 | 1 | Carbamidomethylation | 33522  | PREDICTED: phosphoglycolate phosphatase 1B chloroplastic [Vitis vinifera]       |
| 926  | 1505  | gi 731426023 | 100.27 | 30 | 2 | 1 |                      | 12464  | PREDICTED: protein SPIRAL1-like 1 isoform X2 [Vitis vinifera]                   |
| 1081 | 885   | gi 225449290 | 100.2  | 19 | 4 | 1 |                      | 17051  | PREDICTED: 18.2 kDa class I heat shock protein [Vitis vinifera]                 |
| 925  | 18472 | gi 566162504 | 100.16 | 52 | 4 | 3 | Carbamidomethylation | 11964  | hypothetical protein POPTR_0003s13600g [Populus trichocarpa]                    |
| 1390 | 1632  | gi 225447707 | 100.14 | 13 | 3 | 3 | Carbamidomethylation | 27098  | PREDICTED: uncharacterized protein LOC100263170 [Vitis vinifera]                |
| 1122 | 18129 | gi 566148278 | 100.13 | 11 | 4 | 1 | Carbamidomethylation | 38178  | UDP-glucose 4-epimerase family protein [Populus trichocarpa]                    |
| 1417 | 1344  | gi 225454138 | 100.07 | 12 | 4 | 4 | Carbamidomethylation | 55947  | PREDICTED: DEAD-box ATP-dependent RNA helicase 8 [Vitis vinifera]               |
| 1189 | 1587  | gi 225453350 | 100.01 | 16 | 3 | 3 |                      | 16310  | PREDICTED: nucleoside diphosphate kinase B [Vitis vinifera]                     |
| 1362 | 1405  | gi 225433434 | 99.97  | 6  | 4 | 2 |                      | 65411  | PREDICTED: dihydroxy-acid dehydratase chloroplastic [Vitis vinifera]            |
| 1351 | 1772  | gi 225451677 | 99.96  | 4  | 5 | 1 |                      | 108901 | PREDICTED: staphylococcal nuclease domain-containing protein 1 [Vitis vinifera] |
| 1498 | 17838 | gi 224072208 | 99.87  | 12 | 3 | 1 | Carbamidomethylation | 38044  | UDP-glucose 4-epimerase family protein [Populus trichocarpa]                    |
| 619  | 18002 | gi 566185685 | 99.79  | 14 | 3 | 1 | Carbamidomethylation | 22408  | hypothetical protein POPTR_0009s01050g [Populus trichocarpa]                    |
| 1261 | 797   | gi 225433894 | 99.75  | 3  | 7 | 2 | Carbamidomethylation | 246915 | PREDICTED: U5 small nuclear ribonucleoprotein 200 kDa helicase [Vitis vinifera] |



|      |       |              |       |    |   |   |                      |        |                                                                                     |
|------|-------|--------------|-------|----|---|---|----------------------|--------|-------------------------------------------------------------------------------------|
| 773  | 18108 | gi 566183164 | 99.68 | 19 | 2 | 1 |                      | 19589  | hypothetical protein POPTR_0008s09660g [Populus trichocarpa]                        |
| 830  | 18405 | gi 224095668 | 99.58 | 9  | 3 | 1 |                      | 35550  | hypothetical protein POPTR_0007s01850g [Populus trichocarpa]                        |
| 1441 | 18849 | gi 224065507 | 99.51 | 19 | 3 | 2 |                      | 15080  | Photosystem I reaction center subunit IV A family protein [Populus trichocarpa]     |
| 1097 | 942   | gi 225453935 | 99.37 | 17 | 6 | 5 |                      | 40128  | PREDICTED: 4-hydroxy-tetrahydrodipicolinate synthase chloroplastic [Vitis vinifera] |
| 1114 | 623   | gi 731385630 | 99.34 | 5  | 4 | 4 |                      | 99551  | PREDICTED: heat shock 70 kDa protein 17 [Vitis vinifera]                            |
| 1109 | 915   | gi 225435203 | 99.18 | 39 | 4 | 4 | Carbamidomethylation | 15652  | PREDICTED: 40S ribosomal protein S23-like [Vitis vinifera]                          |
| 974  | 709   | gi 359484512 | 99.16 | 12 | 6 | 6 |                      | 63994  | PREDICTED: asparagine--tRNA ligase cytoplasmic 1 [Vitis vinifera]                   |
| 1666 | 1092  | gi 225456481 | 99.07 | 5  | 6 | 3 |                      | 112435 | PREDICTED: alpha-mannosidase [Vitis vinifera]                                       |
| 2227 | 1301  | gi 731426495 | 99.06 | 4  | 4 | 2 |                      | 120041 | PREDICTED: alpha-mannosidase [Vitis vinifera]                                       |
| 907  | 17507 | gi 224066959 | 99.06 | 17 | 5 | 2 |                      | 29005  | 14-3-3-like protein GF14 omicron [Populus trichocarpa]                              |
| 1903 | 1187  | gi 731395849 | 99.02 | 14 | 4 | 1 |                      | 39121  | PREDICTED: pto-interacting protein 1 [Vitis vinifera]                               |
| 1240 | 17549 | gi 566187890 | 98.92 | 14 | 6 | 6 | Carbamidomethylation | 55453  | 26S proteasome regulatory subunit S3 family protein [Populus trichocarpa]           |
| 1916 | 18040 | gi 566174827 | 98.79 | 5  | 4 | 1 | Carbamidomethylation | 86014  | hypothetical protein POPTR_0006s06460g [Populus trichocarpa]                        |
| 1710 | 28876 | gi 566161682 | 98.78 | 13 | 5 | 5 | Carbamidomethylation | 49311  | AP47/50p mRNA family protein [Populus trichocarpa]                                  |
| 794  | 659   | gi 225435177 | 98.74 | 15 | 5 | 1 | Carbamidomethylation | 27557  | PREDICTED: L-ascorbate peroxidase 2 cytosolic [Vitis vinifera]                      |
| 1061 | 973   | gi 225450215 | 98.74 | 21 | 5 | 2 |                      | 26049  | PREDICTED: 60S ribosomal protein L6-3 [Vitis vinifera]                              |

|      |       |              |       |    |   |   |                      |        |                                                                                                                        |
|------|-------|--------------|-------|----|---|---|----------------------|--------|------------------------------------------------------------------------------------------------------------------------|
| 1330 | 17692 | gi 566192732 | 98.6  | 15 | 5 | 1 | Carbamidomethylation | 44037  | hypothetical protein POPTR_0010s25520g [Populus trichocarpa]                                                           |
| 1084 | 703   | gi 731388929 | 98.56 | 10 | 5 | 2 | Carbamidomethylation | 56541  | PREDICTED: bifunctional 3-dehydroquinase dehydratase/shikimate dehydrogenase chloroplastic isoform X2 [Vitis vinifera] |
| 963  | 698   | gi 731416963 | 98.36 | 24 | 5 | 1 | Carbamidomethylation | 18774  | PREDICTED: peptidyl-prolyl cis-trans isomerase CYP19-3 [Vitis vinifera]                                                |
| 1316 | 17430 | gi 224055647 | 98.34 | 14 | 4 | 2 |                      | 32125  | succinate dehydrogenase iron-sulfur protein subunit [Populus trichocarpa]                                              |
| 825  | 1498  | gi 225459760 | 98.32 | 12 | 5 | 4 |                      | 33454  | PREDICTED: thioredoxin-like protein CDSP32 chloroplastic [Vitis vinifera]                                              |
| 839  | 17365 | gi 224098962 | 98.23 | 15 | 5 | 1 |                      | 29630  | 14-3-3-like protein GF14 iota [Populus trichocarpa]                                                                    |
| 1606 | 2232  | gi 225459360 | 98.22 | 8  | 4 | 2 |                      | 56704  | PREDICTED: probable glucan 1 3-beta-glucosidase A [Vitis vinifera]                                                     |
| 347  | 17149 | gi 224081102 | 98.13 | 49 | 7 | 2 | Carbamidomethylation | 15406  | hypothetical protein POPTR_0005s07340g [Populus trichocarpa]                                                           |
| 1518 | 18223 | gi 566197639 | 98.12 | 12 | 4 | 4 |                      | 44386  | putative proteasome regulatory subunit family protein [Populus trichocarpa]                                            |
| 1668 | 1607  | gi 225445166 | 97.96 | 5  | 6 | 1 | Carbamidomethylation | 122877 | PREDICTED: uncharacterized protein LOC100262932 [Vitis vinifera]                                                       |
| 1395 | 18046 | gi 566168917 | 97.84 | 4  | 4 | 1 |                      | 113232 | hypothetical protein POPTR_0005s02130g [Populus trichocarpa]                                                           |
| 1520 | 28901 | gi 566156965 | 97.79 | 10 | 3 | 1 |                      | 51266  | hypothetical protein POPTR_0002s08650g [Populus trichocarpa]                                                           |
| 1065 | 17773 | gi 566213322 | 97.78 | 8  | 3 | 2 | Carbamidomethylation | 55497  | hypothetical protein POPTR_0017s14220g [Populus trichocarpa]                                                           |

|      |       |              |       |    |   |   |                                     |        |                                                                                                      |
|------|-------|--------------|-------|----|---|---|-------------------------------------|--------|------------------------------------------------------------------------------------------------------|
| 1047 | 653   | gi 225449060 | 97.73 | 6  | 3 | 3 |                                     | 62143  | PREDICTED: protein disulfide isomerase-like 1-4 [Vitis vinifera]                                     |
| 367  | 953   | gi 526118138 | 97.7  | 17 | 4 | 1 |                                     | 33840  | uncharacterized protein LOC100264250 [Vitis vinifera]                                                |
| 1188 | 1608  | gi 225452228 | 97.66 | 12 | 3 | 1 | Carbamidomethylation                | 30877  | PREDICTED: succinate dehydrogenase [ubiquinone] iron-sulfur subunit 1 mitochondrial [Vitis vinifera] |
| 901  | 1099  | gi 731418950 | 97.53 | 2  | 5 | 3 |                                     | 248350 | PREDICTED: nuclear pore complex protein GP210 [Vitis vinifera]                                       |
| 1445 | 951   | gi 731371455 | 97.39 | 8  | 4 | 2 |                                     | 58282  | PREDICTED: coatomer subunit delta [Vitis vinifera]                                                   |
| 1481 | 976   | gi 731405314 | 97.23 | 5  | 4 | 3 |                                     | 97279  | PREDICTED: serine/threonine-protein phosphatase 6 regulatory subunit 2 [Vitis vinifera]              |
| 1682 | 3862  | gi 731416275 | 97.02 | 9  | 5 | 3 | Carbamidomethylation                | 71591  | PREDICTED: mitochondrial Rho GTPase 1 [Vitis vinifera]                                               |
| 1430 | 17391 | gi 566182904 | 97.01 | 8  | 4 | 4 | Carbamidomethylation                | 59760  | hypothetical protein POPTR_0008s07890g [Populus trichocarpa]                                         |
| 940  | 782   | gi 225458719 | 96.98 | 9  | 5 | 1 | Carbamidomethylation; Oxidation (M) | 63799  | PREDICTED: D-3-phosphoglycerate dehydrogenase 3 chloroplastic-like [Vitis vinifera]                  |
| 1266 | 819   | gi 731423558 | 96.97 | 6  | 7 | 6 | Carbamidomethylation; Oxidation (M) | 120839 | PREDICTED: valine--tRNA ligase isoform X2 [Vitis vinifera]                                           |
| 716  | 17947 | gi 224063787 | 96.97 | 28 | 4 | 1 |                                     | 17073  | ribosomal protein S13 [Populus trichocarpa]                                                          |
| 1775 | 7752  | gi 731393817 | 96.88 | 7  | 3 | 3 |                                     | 83302  | PREDICTED: serrate RNA effector molecule [Vitis vinifera]                                            |
| 1488 | 3543  | gi 225430488 | 96.81 | 6  | 3 | 1 |                                     | 73594  | PREDICTED: transmembrane 9 superfamily member 9 [Vitis vinifera]                                     |
| 1125 | 683   | gi 225456085 | 96.81 | 9  | 5 | 5 |                                     | 57173  | PREDICTED: eukaryotic peptide chain release factor GTP-binding subunit ERF3A [Vitis vinifera]        |
| 1282 | 17905 | gi 224105715 | 96.68 | 7  | 3 | 3 | Carbamidomethylation                | 69881  | vacuolar sorting receptor protein BP-80 [Populus trichocarpa]                                        |
| 1166 | 1338  | gi 225441385 | 96.66 | 19 | 5 | 3 |                                     | 25906  | PREDICTED: 60S ribosomal protein L6-1 [Vitis vinifera]                                               |

|      |       |              |       |    |   |   |                      |       |                                                                            |
|------|-------|--------------|-------|----|---|---|----------------------|-------|----------------------------------------------------------------------------|
| 1835 | 19089 | gi 566149765 | 96.64 | 10 | 3 | 2 |                      | 43680 | 3-isopropylmalate dehydrogenase 2 family protein [Populus trichocarpa]     |
| 2076 | 1243  | gi 225438781 | 96.58 | 7  | 3 | 1 | Carbamidomethylation | 71362 | PREDICTED: polyadenylate-binding protein 2 [Vitis vinifera]                |
| 808  | 18121 | gi 566172301 | 96.42 | 10 | 5 | 2 | Carbamidomethylation | 54904 | disulfide-isomerase family protein [Populus trichocarpa]                   |
| 1146 | 1529  | gi 225432466 | 96.36 | 17 | 2 | 2 | Carbamidomethylation | 18476 | PREDICTED: peptide methionine sulfoxide reductase B5-like [Vitis vinifera] |
| 1305 | 17633 | gi 224109084 | 96.32 | 10 | 5 | 1 |                      | 53455 | inosine monophosphate dehydrogenase family protein [Populus trichocarpa]   |
| 1379 | 1728  | gi 225463807 | 96.32 | 9  | 4 | 1 | Carbamidomethylation | 45416 | PREDICTED: alpha-galactosidase [Vitis vinifera]                            |
| 1783 | 1377  | gi 225452877 | 96.31 | 8  | 3 | 2 |                      | 57074 | PREDICTED: cystathionine gamma-synthase chloroplastic [Vitis vinifera]     |
| 1411 | 1354  | gi 731430037 | 96.2  | 9  | 3 | 3 | Carbamidomethylation | 43016 | PREDICTED: probable cinnamyl alcohol dehydrogenase 6 [Vitis vinifera]      |
| 2096 | 1669  | gi 225456459 | 96.18 | 8  | 3 | 2 |                      | 42395 | PREDICTED: V-type proton ATPase subunit C isoform X1 [Vitis vinifera]      |
| 1136 | 17721 | gi 566171771 | 96.17 | 9  | 4 | 2 |                      | 53299 | hypothetical protein POPTR_0005s16590g partial [Populus trichocarpa]       |
| 1010 | 17569 | gi 566167161 | 96.15 | 9  | 3 | 1 | Carbamidomethylation | 40240 | hypothetical protein POPTR_0004s18030g [Populus trichocarpa]               |
| 1855 | 18328 | gi 224063293 | 95.99 | 16 | 4 | 4 | Carbamidomethylation | 31523 | FH INTERACTING protein 1 [Populus trichocarpa]                             |
| 1517 | 695   | gi 359487652 | 95.94 | 9  | 5 | 2 | Carbamidomethylation | 54144 | PREDICTED: fumarate hydratase 1 mitochondrial [Vitis vinifera]             |
| 1311 | 28872 | gi 224118920 | 95.88 | 16 | 5 | 2 | Carbamidomethylation | 48600 | Actin-related family protein [Populus trichocarpa]                         |
| 546  | 1024  | gi 225434935 | 95.74 | 17 | 4 | 1 | Carbamidomethylation | 27348 | PREDICTED: triosephosphate isomerase cytosolic isoform X1 [Vitis vinifera] |
| 1153 | 18325 | gi 566204282 | 95.67 | 13 | 4 | 2 | Carbamidomethylation | 37909 | aldo/keto reductase family protein [Populus trichocarpa]                   |

|      |       |              |       |    |   |   |                      |       |                                                                                                                   |
|------|-------|--------------|-------|----|---|---|----------------------|-------|-------------------------------------------------------------------------------------------------------------------|
| 1711 | 17930 | gi 566208589 | 95.63 | 10 | 4 | 4 |                      | 56137 | dyskerin family protein [Populus trichocarpa]                                                                     |
| 1276 | 17671 | gi 566183513 | 95.56 | 6  | 3 | 2 |                      | 62808 | hypothetical protein POPTR_0008s11770g [Populus trichocarpa]                                                      |
| 1219 | 18232 | gi 566187006 | 95.45 | 7  | 2 | 2 |                      | 50172 | hypothetical protein POPTR_0009s08570g [Populus trichocarpa]                                                      |
| 1179 | 18135 | gi 566160281 | 95.41 | 14 | 3 | 3 |                      | 25839 | beta-hydroxyacyl-ACP dehydratase family protein [Populus trichocarpa]                                             |
| 1419 | 18268 | gi 566195934 | 95.4  | 5  | 4 | 2 | Carbamidomethylation | 83449 | alkaline alpha galactosidase I family protein [Populus trichocarpa]                                               |
| 731  | 17541 | gi 566196811 | 95.2  | 6  | 4 | 1 | Carbamidomethylation | 62410 | hypothetical protein POPTR_0012s04670g [Populus trichocarpa]                                                      |
| 1504 | 715   | gi 731436956 | 95.17 | 10 | 4 | 2 | Carbamidomethylation | 39713 | PREDICTED: porphobilinogen deaminase chloroplastic [Vitis vinifera]                                               |
| 1332 | 2139  | gi 225431755 | 95.1  | 8  | 5 | 1 | Carbamidomethylation | 78694 | PREDICTED: glyoxysomal fatty acid beta-oxidation multifunctional protein MFP-a [Vitis vinifera]                   |
| 632  | 1508  | gi 359476741 | 95.06 | 54 | 3 | 3 | Carbamidomethylation | 8039  | PREDICTED: 60S ribosomal protein L38 [Vitis vinifera]                                                             |
| 1082 | 804   | gi 225460542 | 94.98 | 10 | 3 | 1 |                      | 36331 | PREDICTED: heterogeneous nuclear ribonucleoprotein 1 [Vitis vinifera]                                             |
| 1273 | 3842  | gi 225433424 | 94.85 | 10 | 3 | 1 | Carbamidomethylation | 48624 | PREDICTED: 3-ketoacyl-CoA thiolase 2 peroxisomal [Vitis vinifera]                                                 |
| 1472 | 2222  | gi 225450401 | 94.8  | 5  | 4 | 3 |                      | 83484 | PREDICTED: DEAD-box ATP-dependent RNA helicase 3 chloroplastic [Vitis vinifera]                                   |
| 1585 | 17732 | gi 566198611 | 94.68 | 8  | 6 | 6 |                      | 82290 | hypothetical protein POPTR_0013s00230g [Populus trichocarpa]                                                      |
| 1806 | 723   | gi 731370529 | 94.67 | 6  | 3 | 1 | Carbamidomethylation | 66006 | PREDICTED: serine/threonine-protein phosphatase 2A 65 kDa regulatory subunit A beta isoform-like [Vitis vinifera] |

|      |       |              |       |    |   |   |                      |        |                                                                                      |
|------|-------|--------------|-------|----|---|---|----------------------|--------|--------------------------------------------------------------------------------------|
| 584  | 1421  | gi 731386809 | 94.57 | 11 | 3 | 1 |                      | 41704  | PREDICTED: naringenin 2-oxoglutarate 3-dioxygenase-like [Vitis vinifera]             |
| 1583 | 908   | gi 225426312 | 94.56 | 9  | 4 | 1 |                      | 68263  | PREDICTED: dynamin-related protein 5A [Vitis vinifera]                               |
| 1577 | 2138  | gi 731422323 | 94.54 | 5  | 3 | 1 | Carbamidomethylation | 104895 | PREDICTED: alanine--tRNA ligase-like [Vitis vinifera]                                |
| 1228 | 901   | gi 359493854 | 94.53 | 22 | 4 | 4 |                      | 20058  | PREDICTED: thioredoxin M4 chloroplastic [Vitis vinifera]                             |
| 1194 | 18912 | gi 671743347 | 94.46 | 23 | 2 | 2 |                      | 7800   | photosystem II phosphoprotein (chloroplast) [Camellia pubicosta]                     |
| 1044 | 762   | gi 225448367 | 94.45 | 10 | 3 | 3 |                      | 34281  | PREDICTED: 60S acidic ribosomal protein P0 [Vitis vinifera]                          |
| 869  | 700   | gi 731391332 | 94.44 | 13 | 4 | 1 |                      | 34474  | PREDICTED: 60S ribosomal protein L5 [Vitis vinifera]                                 |
| 1333 | 17866 | gi 566215051 | 94.41 | 5  | 4 | 2 |                      | 106250 | hypothetical protein POPTR_0018s09690g [Populus trichocarpa]                         |
| 1105 | 17949 | gi 224132216 | 94.4  | 28 | 5 | 2 | Carbamidomethylation | 11688  | hypothetical protein POPTR_0014s18990g [Populus trichocarpa]                         |
| 1519 | 861   | gi 731383682 | 94.12 | 20 | 4 | 3 |                      | 23042  | PREDICTED: ras-related protein Rab7 [Vitis vinifera]                                 |
| 1790 | 2166  | gi 359473071 | 94.04 | 5  | 3 | 3 | Carbamidomethylation | 65661  | PREDICTED: bifunctional purine biosynthesis protein purH isoform X2 [Vitis vinifera] |
| 2295 | 28921 | gi 566184237 | 93.96 | 6  | 3 | 2 |                      | 90135  | hypothetical protein POPTR_0008s16030g [Populus trichocarpa]                         |
| 2114 | 17805 | gi 566180142 | 93.95 | 17 | 4 | 4 |                      | 36527  | hypothetical protein POPTR_0007s07780g [Populus trichocarpa]                         |
| 1499 | 1178  | gi 225461906 | 93.86 | 5  | 3 | 1 | Carbamidomethylation | 67756  | PREDICTED: DNA ligase 1 [Vitis vinifera]                                             |
| 1995 | 1606  | gi 225452646 | 93.83 | 11 | 3 | 1 | Carbamidomethylation | 32721  | PREDICTED: protein transport protein SEC13 homolog B [Vitis vinifera]                |
| 1431 | 28907 | gi 224097915 | 93.7  | 19 | 5 | 1 |                      | 30342  | plasma membrane intrinsic protein 1-1 [Populus trichocarpa]                          |

|      |       |              |       |    |   |   |                      |        |                                                                                          |
|------|-------|--------------|-------|----|---|---|----------------------|--------|------------------------------------------------------------------------------------------|
| 1497 | 18416 | gi 224071567 | 93.62 | 7  | 4 | 1 |                      | 65821  | monocopper oxidase precursor family protein [Populus trichocarpa]                        |
| 1017 | 544   | gi 731392981 | 93.61 | 4  | 4 | 1 | Carbamidomethylation | 102178 | PREDICTED: linoleate 13S-lipoxygenase 2-1 chloroplastic-like isoform X2 [Vitis vinifera] |
| 1280 | 19211 | gi 566211720 | 93.57 | 5  | 4 | 2 | Carbamidomethylation | 131864 | hypothetical protein POPTR_0017s06170g [Populus trichocarpa]                             |
| 1471 | 19116 | gi 224078882 | 93.55 | 10 | 3 | 3 | Carbamidomethylation | 34470  | oxidoreductase family protein [Populus trichocarpa]                                      |
| 1475 | 18255 | gi 566174566 | 93.47 | 9  | 5 | 2 |                      | 68630  | hypothetical protein POPTR_0006s05130g [Populus trichocarpa]                             |
| 1032 | 566   | gi 731407251 | 93.27 | 5  | 5 | 2 |                      | 92866  | PREDICTED: phospholipase D alpha 1-like [Vitis vinifera]                                 |
| 1507 | 792   | gi 225465764 | 93.24 | 10 | 3 | 2 | Carbamidomethylation | 43403  | PREDICTED: UDP-D-apiiose/UDP-D-xylose synthase 2 [Vitis vinifera]                        |
| 1397 | 18065 | gi 224100909 | 93.23 | 4  | 5 | 2 |                      | 134447 | splicing factor family protein [Populus trichocarpa]                                     |
| 2092 | 1249  | gi 731421815 | 92.98 | 12 | 4 | 4 | Carbamidomethylation | 53279  | PREDICTED: tubulin gamma-1 chain [Vitis vinifera]                                        |
| 1244 | 946   | gi 225429638 | 92.84 | 10 | 4 | 1 |                      | 39454  | PREDICTED: omega-amidase chloroplastic [Vitis vinifera]                                  |
| 1665 | 28919 | gi 224088822 | 92.79 | 6  | 3 | 2 |                      | 78516  | ftsH-like protease family protein [Populus trichocarpa]                                  |
| 1772 | 18244 | gi 566198992 | 92.75 | 7  | 4 | 2 | Carbamidomethylation | 78312  | hypothetical protein POPTR_0013s02400g [Populus trichocarpa]                             |
| 1394 | 1429  | gi 731408438 | 92.74 | 4  | 3 | 1 | Carbamidomethylation | 107998 | PREDICTED: villin-4 [Vitis vinifera]                                                     |
| 1549 | 18759 | gi 566182594 | 92.64 | 28 | 3 | 3 |                      | 12883  | 60S ribosomal protein L35a [Populus trichocarpa]                                         |
| 1092 | 586   | gi 731439234 | 92.6  | 6  | 4 | 3 | Carbamidomethylation | 74297  | PREDICTED: peroxisomal acyl-coenzyme A oxidase 1 [Vitis vinifera]                        |
| 1545 | 1496  | gi 731392621 | 92.59 | 6  | 3 | 1 |                      | 64193  | PREDICTED: protein disulfide isomerase-like 1-4 isoform X2 [Vitis vinifera]              |
| 857  | 977   | gi 225451247 | 92.57 | 23 | 3 | 3 |                      | 15707  | PREDICTED: 40S ribosomal protein S24-1 [Vitis vinifera]                                  |

|      |       |              |       |    |   |   |                      |        |                                                                                     |
|------|-------|--------------|-------|----|---|---|----------------------|--------|-------------------------------------------------------------------------------------|
| 1525 | 18215 | gi 566147574 | 92.55 | 10 | 3 | 3 |                      | 44838  | hypothetical protein POPTR_0001s06560g [Populus trichocarpa]                        |
| 1677 | 17966 | gi 566191728 | 92.45 | 8  | 4 | 1 | Carbamidomethylation | 64682  | hypothetical protein POPTR_0010s19790g [Populus trichocarpa]                        |
| 1793 | 18204 | gi 566175538 | 92.25 | 4  | 2 | 2 |                      | 96436  | hypothetical protein POPTR_0006s10420g [Populus trichocarpa]                        |
| 1477 | 18117 | gi 566167194 | 92.24 | 12 | 3 | 3 | Carbamidomethylation | 41861  | glycerate dehydrogenase family protein [Populus trichocarpa]                        |
| 2244 | 18220 | gi 566152765 | 92.19 | 12 | 4 | 4 |                      | 49287  | hypothetical protein POPTR_0001s34620g [Populus trichocarpa]                        |
| 909  | 2123  | gi 526117649 | 92.15 | 11 | 5 | 3 | Carbamidomethylation | 41054  | alcohol dehydrogenase 1 [Vitis vinifera]                                            |
| 1605 | 1649  | gi 225469310 | 92.02 | 16 | 4 | 4 | Carbamidomethylation | 39287  | PREDICTED: sorbitol dehydrogenase [Vitis vinifera]                                  |
| 1035 | 28878 | gi 225433841 | 92.02 | 5  | 6 | 4 | Carbamidomethylation | 135558 | PREDICTED: probable isoleucine--tRNA ligase cytoplasmic isoform X2 [Vitis vinifera] |
| 1239 | 17965 | gi 224062213 | 91.88 | 24 | 2 | 2 |                      | 17225  | hypothetical protein POPTR_0002s04420g [Populus trichocarpa]                        |
| 1446 | 18246 | gi 566215059 | 91.84 | 9  | 4 | 1 |                      | 67827  | hypothetical protein POPTR_0018s09760g [Populus trichocarpa]                        |
| 1744 | 2325  | gi 225443274 | 91.74 | 12 | 3 | 3 |                      | 35506  | PREDICTED: cell wall integrity protein scw1 [Vitis vinifera]                        |
| 1391 | 1503  | gi 225461001 | 91.68 | 7  | 2 | 2 |                      | 46284  | PREDICTED: polyadenylate-binding protein RBP45-like [Vitis vinifera]                |
| 1295 | 17578 | gi 566198207 | 91.44 | 11 | 4 | 1 |                      | 32557  | hypothetical protein POPTR_0012s12860g [Populus trichocarpa]                        |
| 1528 | 2319  | gi 225452270 | 91.39 | 8  | 2 | 2 |                      | 34598  | PREDICTED: 28 kDa ribonucleoprotein chloroplastic-like [Vitis vinifera]             |
| 1515 | 2321  | gi 731416683 | 91.38 | 16 | 2 | 2 | Carbamidomethylation | 15282  | PREDICTED: superoxide dismutase [Cu-Zn] isoform X2 [Vitis vinifera]                 |



|      |       |              |       |    |   |   |                      |        |                                                                                                            |
|------|-------|--------------|-------|----|---|---|----------------------|--------|------------------------------------------------------------------------------------------------------------|
| 1233 | 1651  | gi 225438962 | 91.31 | 6  | 2 | 2 |                      | 35957  | PREDICTED: peroxidase 73 [Vitis vinifera]                                                                  |
| 573  | 1077  | gi 225448675 | 91.2  | 16 | 3 | 3 |                      | 23332  | PREDICTED: probable chalcone--flavonone isomerase 3 [Vitis vinifera]                                       |
| 1267 | 845   | gi 225428011 | 91.17 | 8  | 5 | 2 |                      | 61287  | PREDICTED: synaptotagmin-2 [Vitis vinifera]                                                                |
| 1285 | 18981 | gi 224146411 | 90.98 | 8  | 3 | 1 |                      | 49063  | dihydrolipoamide S-acetyltransferase family protein [Populus trichocarpa]                                  |
| 718  | 17746 | gi 566215609 | 90.96 | 4  | 3 | 2 |                      | 91834  | hypothetical protein POPTR_0018s13110g [Populus trichocarpa]                                               |
| 1364 | 17497 | gi 566205259 | 90.93 | 21 | 5 | 4 | Carbamidomethylation | 29312  | hypothetical protein POPTR_0015s00690g [Populus trichocarpa]                                               |
| 1881 | 842   | gi 731424103 | 90.77 | 2  | 2 | 1 | Carbamidomethylation | 151229 | PREDICTED: tripeptidyl-peptidase 2 isoform X1 [Vitis vinifera]                                             |
| 1453 | 2304  | gi 225435608 | 90.73 | 11 | 2 | 2 | Carbamidomethylation | 31609  | PREDICTED: zinc finger CCCH domain-containing protein 14-like [Vitis vinifera]                             |
| 1262 | 18807 | gi 566190669 | 90.67 | 7  | 3 | 1 |                      | 48407  | hypothetical protein POPTR_0010s13650g [Populus trichocarpa]                                               |
| 898  | 888   | gi 225448819 | 90.65 | 24 | 3 | 3 |                      | 14272  | PREDICTED: 60S ribosomal protein L35 [Vitis vinifera]                                                      |
| 1532 | 28891 | gi 224087393 | 90.61 | 12 | 4 | 1 |                      | 50473  | hypothetical protein POPTR_0006s08310g [Populus trichocarpa]                                               |
| 849  | 1653  | gi 225429975 | 90.61 | 8  | 3 | 2 |                      | 39098  | PREDICTED: bark storage protein A [Vitis vinifera]                                                         |
| 999  | 18187 | gi 566211618 | 90.6  | 9  | 3 | 1 |                      | 35272  | pfkB-type carbohydrate kinase family protein [Populus trichocarpa]                                         |
| 1948 | 1854  | gi 225470285 | 90.58 | 14 | 3 | 3 |                      | 32382  | PREDICTED: ATP-dependent Clp protease proteolytic subunit-related protein 2 chloroplastic [Vitis vinifera] |
| 1202 | 730   | gi 731433246 | 90.41 | 7  | 5 | 5 | Carbamidomethylation | 78819  | PREDICTED: threonine--tRNA ligase mitochondrial-like [Vitis vinifera]                                      |

|      |       |              |       |    |   |   |                      |        |                                                                              |
|------|-------|--------------|-------|----|---|---|----------------------|--------|------------------------------------------------------------------------------|
| 1478 | 18611 | gi 224077508 | 90.35 | 12 | 4 | 1 |                      | 39890  | putative protein phosphatase [Populus trichocarpa]                           |
| 1522 | 1588  | gi 225429995 | 90.29 | 29 | 3 | 2 | Carbamidomethylation | 17724  | PREDICTED: protein PEROXIN-4 [Vitis vinifera]                                |
| 786  | 18054 | gi 224068558 | 90.28 | 12 | 3 | 2 |                      | 32725  | NUCLEAR ENCODED CLP PROTEASE 1 family protein [Populus trichocarpa]          |
| 1324 | 1091  | gi 225428916 | 90.21 | 14 | 4 | 3 |                      | 39009  | PREDICTED: probable cinnamyl alcohol dehydrogenase 1 [Vitis vinifera]        |
| 1049 | 1119  | gi 225450677 | 90.14 | 4  | 4 | 1 | Carbamidomethylation | 124814 | PREDICTED: topless-related protein 3 [Vitis vinifera]                        |
| 1533 | 1552  | gi 359495476 | 90.09 | 23 | 4 | 4 |                      | 29035  | PREDICTED: chlorophyll a-b binding protein 13 chloroplastic [Vitis vinifera] |
| 1334 | 1145  | gi 359475871 | 90.08 | 20 | 4 | 4 | Carbamidomethylation | 32719  | PREDICTED: protein MEMO1 [Vitis vinifera]                                    |
| 1451 | 2318  | gi 731430027 | 90.03 | 26 | 3 | 1 | Carbamidomethylation | 17695  | PREDICTED: SKP1-like protein 1B [Vitis vinifera]                             |
| 1013 | 17931 | gi 224079093 | 89.97 | 29 | 4 | 4 |                      | 12417  | 60S ribosomal protein L36-3 [Populus trichocarpa]                            |
| 1720 | 2044  | gi 225443859 | 89.91 | 6  | 2 | 1 |                      | 24656  | PREDICTED: calcyclin-binding protein [Vitis vinifera]                        |
| 2351 | 19380 | gi 731407226 | 89.88 | 9  | 2 | 2 | Carbamidomethylation | 37934  | PREDICTED: 2-alkenal reductase (NADP(+)-dependent) [Vitis vinifera]          |
| 1476 | 1271  | gi 225459587 | 89.82 | 6  | 4 | 1 |                      | 55671  | PREDICTED: protein disulfide-isomerase [Vitis vinifera]                      |
| 1591 | 18337 | gi 566204836 | 89.77 | 4  | 2 | 1 | Carbamidomethylation | 84382  | hypothetical protein POPTR_0014s17660g [Populus trichocarpa]                 |
| 1947 | 2175  | gi 225437374 | 89.76 | 8  | 4 | 2 |                      | 49415  | PREDICTED: UDP-glucuronic acid decarboxylase 2-like [Vitis vinifera]         |
| 1910 | 18049 | gi 566147740 | 89.72 | 9  | 3 | 1 |                      | 36450  | hypothetical protein POPTR_0001s07480g [Populus trichocarpa]                 |
| 1066 | 18175 | gi 566202597 | 89.71 | 17 | 3 | 1 |                      | 16336  | hypothetical protein POPTR_0014s04880g [Populus trichocarpa]                 |

|      |       |              |       |    |   |   |                      |        |                                                                                                 |
|------|-------|--------------|-------|----|---|---|----------------------|--------|-------------------------------------------------------------------------------------------------|
| 1124 | 829   | gi 225436257 | 89.63 | 12 | 3 | 3 |                      | 29530  | PREDICTED: chlorophyll a-b binding protein 8 chloroplastic [Vitis vinifera]                     |
| 460  | 1401  | gi 731386455 | 89.59 | 1  | 3 | 2 |                      | 95638  | PREDICTED: sucrose synthase 7 isoform X3 [Vitis vinifera]                                       |
| 1542 | 28895 | gi 224111100 | 89.51 | 14 | 4 | 1 | Carbamidomethylation | 27203  | hypothetical protein POPTR_0010s09180g [Populus trichocarpa]                                    |
| 384  | 753   | gi 731391225 | 89.43 | 10 | 4 | 1 |                      | 38311  | PREDICTED: endochitinase A-like isoform X1 [Vitis vinifera]                                     |
| 600  | 1507  | gi 225470846 | 89.35 | 13 | 2 | 1 |                      | 22027  | PREDICTED: nascent polypeptide-associated complex subunit alpha-like protein 1 [Vitis vinifera] |
| 918  | 1352  | gi 225428908 | 89.3  | 6  | 3 | 3 |                      | 53765  | PREDICTED: limonoid UDP-glucosyltransferase [Vitis vinifera]                                    |
| 1484 | 1481  | gi 731415988 | 89.29 | 4  | 4 | 1 |                      | 119890 | PREDICTED: FACT complex subunit SPT16-like [Vitis vinifera]                                     |
| 1704 | 18105 | gi 224145917 | 89.21 | 10 | 3 | 3 |                      | 44521  | Uroporphyrinogen decarboxylase family protein [Populus trichocarpa]                             |
| 1723 | 17680 | gi 566162135 | 89.18 | 18 | 5 | 1 | Oxidation (M)        | 27086  | hypothetical protein POPTR_0003s11350g [Populus trichocarpa]                                    |
| 1050 | 1029  | gi 359473645 | 89.13 | 4  | 4 | 2 | Carbamidomethylation | 66079  | PREDICTED: chaperonin 60 subunit beta 4 chloroplastic [Vitis vinifera]                          |
| 2202 | 19149 | gi 566215907 | 89.13 | 3  | 3 | 3 |                      | 131624 | hypothetical protein POPTR_0018s14630g [Populus trichocarpa]                                    |
| 932  | 17315 | gi 224079274 | 89.07 | 9  | 4 | 1 |                      | 41124  | ubiquitin family protein [Populus trichocarpa]                                                  |
| 1002 | 17604 | gi 566194465 | 89.04 | 12 | 3 | 2 |                      | 24921  | SGS domain-containing family protein [Populus trichocarpa]                                      |
| 1143 | 876   | gi 225429341 | 88.98 | 9  | 3 | 2 | Carbamidomethylation | 44078  | PREDICTED: 3-oxo-Delta(4 5)-steroid 5-beta-reductase-like [Vitis vinifera]                      |
| 1460 | 17626 | gi 224072049 | 88.84 | 13 | 4 | 1 |                      | 28211  | reticulon family protein [Populus trichocarpa]                                                  |
| 1857 | 2404  | gi 225456349 | 88.73 | 14 | 3 | 1 |                      | 26827  | PREDICTED: gamma carbonic anhydrase-like 2 mitochondrial [Vitis vinifera]                       |

|      |       |              |       |    |   |   |                      |       |                                                                        |
|------|-------|--------------|-------|----|---|---|----------------------|-------|------------------------------------------------------------------------|
| 1169 | 2109  | gi 225451233 | 88.71 | 9  | 2 | 1 | Carbamidomethylation | 34208 | PREDICTED: cysteine synthase [Vitis vinifera]                          |
| 1648 | 17900 | gi 224104697 | 88.63 | 16 | 3 | 1 |                      | 20848 | lactoylglutathione lyase family protein [Populus trichocarpa]          |
| 1713 | 20422 | gi 224082496 | 88.62 | 18 | 3 | 2 | Carbamidomethylation | 38736 | peroxidase precursor family protein [Populus trichocarpa]              |
| 1569 | 763   | gi 225433440 | 88.62 | 11 | 4 | 4 |                      | 53869 | PREDICTED: glutathione reductase cytosolic [Vitis vinifera]            |
| 1372 | 18219 | gi 566163043 | 88.62 | 6  | 4 | 1 |                      | 67870 | glucose-6-phosphate dehydrogenase family protein [Populus trichocarpa] |
| 1526 | 20416 | gi 566200837 | 88.58 | 47 | 4 | 2 | Carbamidomethylation | 13900 | ribosomal protein L7Ae/L30e/S12e/Gadd45 [Populus trichocarpa]          |
| 1602 | 18196 | gi 566245692 | 88.56 | 11 | 3 | 1 |                      | 25488 | hypothetical protein POPTR_0019s15100g [Populus trichocarpa]           |
| 1150 | 18146 | gi 566178654 | 88.56 | 6  | 4 | 1 | Carbamidomethylation | 74689 | hypothetical protein POPTR_0006s28750g [Populus trichocarpa]           |
| 1294 | 722   | gi 225430200 | 88.53 | 14 | 7 | 3 |                      | 40334 | PREDICTED: uncharacterized protein LOC100252479 [Vitis vinifera]       |
| 1692 | 17468 | gi 566177699 | 88.49 | 8  | 3 | 1 |                      | 48113 | hypothetical protein POPTR_0006s23050g [Populus trichocarpa]           |
| 908  | 17329 | gi 566191085 | 88.4  | 11 | 6 | 1 | Carbamidomethylation | 51784 | hypothetical protein POPTR_0010s16120g [Populus trichocarpa]           |
| 1087 | 18542 | gi 224124892 | 88.3  | 13 | 2 | 1 |                      | 22641 | rhicadhesin receptor family protein [Populus trichocarpa]              |
| 823  | 18516 | gi 224104953 | 88.25 | 6  | 4 | 2 |                      | 68350 | beta-D-glucan exohydrolase family protein [Populus trichocarpa]        |
| 980  | 18015 | gi 224116326 | 88.15 | 10 | 4 | 1 |                      | 36463 | Leucoanthocyanidin reductase family protein [Populus trichocarpa]      |
| 1817 | 19367 | gi 566170761 | 88.13 | 9  | 3 | 1 |                      | 48329 | hypothetical protein POPTR_0005s11300g [Populus trichocarpa]           |

|      |       |              |       |    |   |   |                      |        |                                                                                     |
|------|-------|--------------|-------|----|---|---|----------------------|--------|-------------------------------------------------------------------------------------|
| 1894 | 1736  | gi 731410731 | 88.08 | 2  | 3 | 1 |                      | 178423 | PREDICTED: UDP-glucose:glycoprotein glucosyltransferase isoform X2 [Vitis vinifera] |
| 1647 | 17528 | gi 566162704 | 88.02 | 28 | 3 | 2 | Carbamidomethylation | 18629  | hypothetical protein POPTR_0003s14870g [Populus trichocarpa]                        |
| 2029 | 18286 | gi 566188208 | 88.02 | 3  | 3 | 3 |                      | 139500 | TITAN7 family protein [Populus trichocarpa]                                         |
| 1993 | 3535  | gi 225428388 | 88    | 14 | 4 | 4 | Carbamidomethylation | 40284  | PREDICTED: COP9 signalosome complex subunit 5b-like [Vitis vinifera]                |
| 1392 | 2305  | gi 526117321 | 87.93 | 12 | 2 | 2 |                      | 23675  | dehydroascorbate reductase [Vitis vinifera]                                         |
| 1366 | 19068 | gi 224075417 | 87.87 | 13 | 3 | 1 | Carbamidomethylation | 34152  | EXGT1 family protein [Populus trichocarpa]                                          |
| 2024 | 2210  | gi 225435307 | 87.82 | 6  | 2 | 1 | Carbamidomethylation | 49888  | PREDICTED: ruvB-like protein 1 [Vitis vinifera]                                     |
| 1272 | 17479 | gi 224097148 | 87.82 | 11 | 4 | 4 | Carbamidomethylation | 41439  | GDP-mannose 4 family protein [Populus trichocarpa]                                  |
| 495  | 1532  | gi 225460502 | 87.73 | 4  | 2 | 2 | Carbamidomethylation | 64083  | PREDICTED: laccase-14 [Vitis vinifera]                                              |
| 1521 | 778   | gi 359483949 | 87.58 | 11 | 4 | 1 | Carbamidomethylation | 42343  | PREDICTED: ferredoxin--NADP reductase root isozyme chloroplastic [Vitis vinifera]   |
| 1409 | 18329 | gi 224120174 | 87.55 | 8  | 4 | 3 | Carbamidomethylation | 68576  | Phosphoglucomutase family protein [Populus trichocarpa]                             |
| 1354 | 1683  | gi 225467712 | 87.53 | 7  | 3 | 2 | Carbamidomethylation | 62107  | PREDICTED: UPF0051 protein ABCI8 chloroplastic [Vitis vinifera]                     |
| 1412 | 17743 | gi 566175322 | 87.48 | 9  | 2 | 1 |                      | 35273  | aldo/keto reductase family protein [Populus trichocarpa]                            |
| 1180 | 1353  | gi 225428047 | 87.47 | 22 | 3 | 1 | Carbamidomethylation | 17518  | PREDICTED: SKP1-like protein 1A isoform X5 [Vitis vinifera]                         |
| 1524 | 17674 | gi 224104643 | 87.41 | 6  | 3 | 1 |                      | 65194  | thioredoxin family protein [Populus trichocarpa]                                    |
| 1926 | 17828 | gi 224082834 | 87.4  | 7  | 4 | 1 | Carbamidomethylation | 69308  | dehydration-responsive family protein [Populus trichocarpa]                         |
| 1902 | 1995  | gi 731412542 | 87.37 | 11 | 4 | 4 |                      | 58149  | PREDICTED: uncharacterized protein LOC100244432 isoform X4 [Vitis vinifera]         |

|      |       |              |       |    |   |   |                      |        |                                                                                     |
|------|-------|--------------|-------|----|---|---|----------------------|--------|-------------------------------------------------------------------------------------|
| 1187 | 931   | gi 225434323 | 87.34 | 14 | 4 | 4 | Carbamidomethylation | 30353  | PREDICTED: eukaryotic translation initiation factor 2 subunit beta [Vitis vinifera] |
| 1389 | 1090  | gi 225465997 | 87.34 | 9  | 4 | 3 | Carbamidomethylation | 48382  | PREDICTED: WD-40 repeat-containing protein MSI1 [Vitis vinifera]                    |
| 1268 | 868   | gi 225455106 | 87.25 | 9  | 3 | 3 |                      | 33350  | PREDICTED: protein BOBBER 1 [Vitis vinifera]                                        |
| 1550 | 1108  | gi 731389140 | 87.23 | 8  | 4 | 2 | Carbamidomethylation | 58551  | PREDICTED: RAN GTPase-activating protein 2 [Vitis vinifera]                         |
| 1890 | 1901  | gi 225430912 | 87.16 | 16 | 3 | 3 |                      | 35298  | PREDICTED: membrane-associated protein VIPP1 chloroplastic [Vitis vinifera]         |
| 1821 | 18326 | gi 224109088 | 87.09 | 6  | 3 | 3 | Carbamidomethylation | 57503  | SUCCINIC SEMIALDEHYDE DEHYDROGENASE family protein [Populus trichocarpa]            |
| 1396 | 28899 | gi 224101049 | 87.05 | 14 | 4 | 3 | Carbamidomethylation | 35917  | type 1 protein phosphatase-1 [Populus trichocarpa]                                  |
| 1345 | 1381  | gi 526117942 | 86.97 | 6  | 2 | 1 |                      | 37456  | beta 1-3 glucanase precursor [Vitis vinifera]                                       |
| 1511 | 17840 | gi 224054773 | 86.87 | 20 | 4 | 1 |                      | 17854  | 17.4 kDa class I heat shock family protein [Populus trichocarpa]                    |
| 1078 | 28882 | gi 566208767 | 86.87 | 8  | 6 | 2 |                      | 89399  | hypothetical protein POPTR_0016s04960g [Populus trichocarpa]                        |
| 1726 | 890   | gi 225442223 | 86.81 | 7  | 3 | 3 |                      | 49618  | PREDICTED: glycolipid N-tetradecanoyltransferase 1 [Vitis vinifera]                 |
| 1537 | 18393 | gi 224100515 | 86.74 | 13 | 3 | 3 | Carbamidomethylation | 45833  | hypothetical protein POPTR_0008s00700g [Populus trichocarpa]                        |
| 870  | 941   | gi 225456914 | 86.74 | 21 | 4 | 3 | Carbamidomethylation | 16350  | PREDICTED: 60S ribosomal protein L27a-3 [Vitis vinifera]                            |
| 1048 | 1128  | gi 731418015 | 86.72 | 14 | 5 | 4 |                      | 53972  | PREDICTED: tryptophan synthase beta chain 1 [Vitis vinifera]                        |
| 1803 | 17920 | gi 224087657 | 86.7  | 12 | 3 | 2 |                      | 32555  | UNCOUPLING family protein [Populus trichocarpa]                                     |
| 1762 | 18184 | gi 224122176 | 86.61 | 4  | 3 | 1 |                      | 113456 | hypothetical protein POPTR_0012s10830g [Populus trichocarpa]                        |

|      |       |              |       |    |   |   |                      |        |                                                                                            |
|------|-------|--------------|-------|----|---|---|----------------------|--------|--------------------------------------------------------------------------------------------|
| 1298 | 18261 | gi 224109256 | 86.28 | 12 | 3 | 2 |                      | 29460  | ferritin 2 precursor family protein [Populus trichocarpa]                                  |
| 1714 | 28968 | gi 224099715 | 86.19 | 10 | 3 | 3 | Carbamidomethylation | 36854  | spermidine synthase family protein [Populus trichocarpa]                                   |
| 1891 | 508   | gi 731432625 | 86.17 | 2  | 2 | 1 | Carbamidomethylation | 121307 | PREDICTED: protein transport protein Sec24-like At4g32640 [Vitis vinifera]                 |
| 1245 | 1184  | gi 731387210 | 86.13 | 8  | 3 | 3 |                      | 42062  | PREDICTED: splicing factor U2af large subunit B isoform X4 [Vitis vinifera]                |
| 1458 | 28904 | gi 566214978 | 86.04 | 6  | 4 | 4 | Carbamidomethylation | 87044  | hypothetical protein POPTR_0018s09300g [Populus trichocarpa]                               |
| 1374 | 17736 | gi 224080971 | 86.03 | 13 | 2 | 1 | Carbamidomethylation | 18386  | hypothetical protein POPTR_0005s06420g [Populus trichocarpa]                               |
| 1387 | 1863  | gi 359487567 | 85.95 | 4  | 2 | 2 | Carbamidomethylation | 41694  | PREDICTED: GDSL esterase/lipase At1g09390 [Vitis vinifera]                                 |
| 1646 | 1276  | gi 225457405 | 85.88 | 10 | 3 | 1 |                      | 51267  | PREDICTED: geranylgeranyl diphosphate reductase chloroplastic [Vitis vinifera]             |
| 1630 | 1120  | gi 225465441 | 85.82 | 17 | 2 | 1 |                      | 14675  | PREDICTED: cytochrome b5 [Vitis vinifera]                                                  |
| 978  | 17596 | gi 566171781 | 85.59 | 5  | 4 | 4 |                      | 84742  | hypothetical protein POPTR_0005s16660g [Populus trichocarpa]                               |
| 1763 | 29006 | gi 566209510 | 85.58 | 2  | 2 | 2 |                      | 144287 | P glycoprotein1 [Populus trichocarpa]                                                      |
| 1418 | 1211  | gi 731391365 | 85.47 | 10 | 4 | 2 | Carbamidomethylation | 52738  | PREDICTED: acetolactate synthase small subunit 2 chloroplastic isoform X2 [Vitis vinifera] |
| 1816 | 2587  | gi 359480790 | 85.43 | 7  | 4 | 1 |                      | 64379  | PREDICTED: patellin-3-like [Vitis vinifera]                                                |
| 1784 | 18355 | gi 224084344 | 85.41 | 10 | 3 | 2 | Carbamidomethylation | 40622  | RNA recognition motif-containing family protein [Populus trichocarpa]                      |
| 1308 | 1323  | gi 526117539 | 85.39 | 10 | 2 | 1 | Carbamidomethylation | 34687  | class I extracellular chitinase precursor [Vitis vinifera]                                 |
| 1547 | 1688  | gi 359479353 | 85.24 | 18 | 3 | 1 |                      | 21048  | PREDICTED: lactoylglutathione lyase isoform X2 [Vitis vinifera]                            |

|      |       |              |       |    |   |   |                      |        |                                                                             |
|------|-------|--------------|-------|----|---|---|----------------------|--------|-----------------------------------------------------------------------------|
| 1625 | 18005 | gi 224074217 | 85.19 | 16 | 3 | 1 | Carbamidomethylation | 22693  | GTP-binding family protein [Populus trichocarpa]                            |
| 2085 | 29041 | gi 224057608 | 85.03 | 5  | 2 | 1 | Carbamidomethylation | 65798  | dehydratase family protein [Populus trichocarpa]                            |
| 1257 | 17955 | gi 224097434 | 84.89 | 10 | 3 | 1 | Carbamidomethylation | 40856  | cytokinesis defective 1 family protein [Populus trichocarpa]                |
| 1480 | 17856 | gi 731401507 | 84.88 | 3  | 3 | 3 | Carbamidomethylation | 138211 | PREDICTED: 5-oxoprolinase [Vitis vinifera]                                  |
| 1747 | 1351  | gi 225464146 | 84.86 | 10 | 3 | 1 |                      | 32622  | PREDICTED: protein transport protein SEC13 homolog B [Vitis vinifera]       |
| 1025 | 1214  | gi 731426684 | 84.68 | 6  | 5 | 3 | Oxidation (M)        | 144086 | PREDICTED: uncharacterized protein LOC100262718 isoform X4 [Vitis vinifera] |
| 1672 | 18606 | gi 566198676 | 84.67 | 5  | 4 | 1 |                      | 124815 | hypothetical protein POPTR_0013s00600g [Populus trichocarpa]                |
| 1781 | 17712 | gi 224120862 | 84.66 | 7  | 4 | 1 | Carbamidomethylation | 96570  | importin beta-2 family protein [Populus trichocarpa]                        |
| 1447 | 17864 | gi 566153954 | 84.65 | 15 | 4 | 2 |                      | 31003  | phosphatase 2C family protein [Populus trichocarpa]                         |
| 1349 | 3233  | gi 731379296 | 84.62 | 5  | 5 | 2 | Carbamidomethylation | 114179 | PREDICTED: uncharacterized protein LOC100264973 [Vitis vinifera]            |
| 1966 | 2392  | gi 731382564 | 84.4  | 9  | 3 | 3 | Carbamidomethylation | 53798  | PREDICTED: aminoacylase-1 isoform X2 [Vitis vinifera]                       |
| 1696 | 17854 | gi 224062834 | 84.32 | 6  | 3 | 2 | Carbamidomethylation | 70900  | Polyadenylate-binding protein 5 [Populus trichocarpa]                       |
| 1632 | 1512  | gi 225454123 | 84.25 | 14 | 2 | 1 |                      | 22997  | PREDICTED: pre-mRNA cleavage factor Im 25 kDa subunit 2 [Vitis vinifera]    |
| 1680 | 28969 | gi 225468850 | 84.19 | 12 | 3 | 3 |                      | 30830  | PREDICTED: glyoxylate/succinic semialdehyde reductase 1 [Vitis vinifera]    |
| 1886 | 18911 | gi 566184573 | 84.17 | 4  | 2 | 1 |                      | 90021  | urease family protein [Populus trichocarpa]                                 |
| 1227 | 540   | gi 225449262 | 84.16 | 24 | 5 | 1 |                      | 18173  | PREDICTED: 18.1 kDa class I heat shock protein [Vitis vinifera]             |



|      |       |              |       |    |   |   |                      |        |                                                                                             |
|------|-------|--------------|-------|----|---|---|----------------------|--------|---------------------------------------------------------------------------------------------|
| 1482 | 18304 | gi 566184588 | 84.1  | 14 | 3 | 2 |                      | 33826  | hypothetical protein POPTR_0008s17880g [Populus trichocarpa]                                |
| 2252 | 19669 | gi 359487440 | 84.09 | 12 | 2 | 2 |                      | 26076  | PREDICTED: serine/arginine-rich SC35-like splicing factor SCL33 isoform X2 [Vitis vinifera] |
| 1588 | 721   | gi 225429209 | 83.97 | 7  | 4 | 2 |                      | 53142  | PREDICTED: serine carboxypeptidase-like 16 [Vitis vinifera]                                 |
| 1815 | 19228 | gi 224086367 | 83.95 | 24 | 5 | 1 | Carbamidomethylation | 27400  | Proteasome subunit alpha type 4 family protein [Populus trichocarpa]                        |
| 1455 | 3226  | gi 526118000 | 83.92 | 13 | 2 | 1 |                      | 22732  | germin-like protein 2 precursor [Vitis vinifera]                                            |
| 2042 | 471   | gi 225433575 | 83.74 | 4  | 2 | 2 | Carbamidomethylation | 105215 | PREDICTED: probable glucan 1 3-alpha-glucosidase [Vitis vinifera]                           |
| 1712 | 17815 | gi 566187112 | 83.7  | 12 | 3 | 3 | Carbamidomethylation | 38128  | WD-40 repeat family protein [Populus trichocarpa]                                           |
| 1487 | 18132 | gi 566151049 | 83.7  | 13 | 3 | 3 | Carbamidomethylation | 26982  | hypothetical protein POPTR_0001s26020g [Populus trichocarpa]                                |
| 661  | 18371 | gi 224116936 | 83.57 | 4  | 2 | 1 |                      | 63722  | pyruvate decarboxylase family protein [Populus trichocarpa]                                 |
| 1685 | 1173  | gi 731393107 | 83.52 | 5  | 3 | 1 |                      | 108073 | PREDICTED: DNA (cytosine-5)-methyltransferase CMT3 [Vitis vinifera]                         |
| 1707 | 18000 | gi 526118245 | 83.48 | 12 | 2 | 1 | Carbamidomethylation | 23461  | peroxiredoxin Q [Vitis vinifera]                                                            |
| 1669 | 3156  | gi 225454813 | 83.33 | 4  | 3 | 2 | Carbamidomethylation | 123938 | PREDICTED: exportin-1 [Vitis vinifera]                                                      |
| 1607 | 1550  | gi 225427294 | 83.23 | 23 | 4 | 1 |                      | 23133  | PREDICTED: ras-related protein RABH1b [Vitis vinifera]                                      |
| 757  | 914   | gi 225440109 | 83.17 | 25 | 4 | 2 |                      | 10658  | PREDICTED: 10 kDa chaperonin [Vitis vinifera]                                               |
| 1106 | 18512 | gi 566209992 | 83.13 | 9  | 2 | 1 | Carbamidomethylation | 39168  | hypothetical protein POPTR_0016s12850g [Populus trichocarpa]                                |
| 1231 | 17665 | gi 566230552 | 83.1  | 13 | 3 | 3 |                      | 26405  | vacuolar ATPase subunit E family protein [Populus trichocarpa]                              |
| 1191 | 18766 | gi 566202435 | 83.07 | 24 | 4 | 3 |                      | 22118  | uridylyate kinase family protein [Populus trichocarpa]                                      |

|      |       |              |       |    |   |   |                      |        |                                                                                                      |
|------|-------|--------------|-------|----|---|---|----------------------|--------|------------------------------------------------------------------------------------------------------|
| 1428 | 18241 | gi 566146307 | 83.05 | 10 | 5 | 2 | Carbamidomethylation | 66102  | monocopper oxidase precursor family protein [Populus trichocarpa]                                    |
| 1470 | 1495  | gi 731437632 | 82.97 | 12 | 4 | 4 | Carbamidomethylation | 44812  | PREDICTED: branched-chain-amino-acid aminotransferase 5 chloroplastic [Vitis vinifera]               |
| 1168 | 1292  | gi 731378427 | 82.81 | 6  | 3 | 1 |                      | 51975  | PREDICTED: uncharacterized protein LOC100263310 [Vitis vinifera]                                     |
| 1336 | 1201  | gi 225454278 | 82.79 | 6  | 2 | 2 |                      | 40499  | PREDICTED: bifunctional L-3-cyanoalanine synthase/cysteine synthase 1 mitochondrial [Vitis vinifera] |
| 847  | 836   | gi 225458231 | 82.77 | 12 | 4 | 4 | Carbamidomethylation | 30646  | PREDICTED: proteasome subunit alpha type-1-B [Vitis vinifera]                                        |
| 1798 | 29073 | gi 225429981 | 82.75 | 4  | 2 | 2 |                      | 110340 | PREDICTED: ER membrane protein complex subunit 1 [Vitis vinifera]                                    |
| 1094 | 1011  | gi 225435878 | 82.61 | 28 | 3 | 2 |                      | 10567  | PREDICTED: 10 kDa chaperonin [Vitis vinifera]                                                        |
| 1246 | 17984 | gi 224078816 | 82.58 | 11 | 4 | 1 |                      | 36460  | Leucoanthocyanidin reductase family protein [Populus trichocarpa]                                    |
| 1933 | 1251  | gi 731432083 | 82.54 | 2  | 2 | 1 |                      | 115512 | PREDICTED: protein transport protein Sec24-like At3g07100 [Vitis vinifera]                           |
| 2245 | 18096 | gi 566198674 | 82.53 | 3  | 3 | 1 |                      | 120951 | hypothetical protein POPTR_0013s00590g [Populus trichocarpa]                                         |
| 1930 | 19298 | gi 224122632 | 82.5  | 7  | 3 | 1 |                      | 66196  | Monocopper oxidase-like protein SKS1 precursor [Populus trichocarpa]                                 |
| 1335 | 1287  | gi 225460991 | 82.47 | 5  | 3 | 1 | Carbamidomethylation | 86153  | PREDICTED: heat shock 70 kDa protein 16 [Vitis vinifera]                                             |
| 1780 | 28905 | gi 566161636 | 82.47 | 8  | 3 | 1 | Carbamidomethylation | 63019  | Pyruvate kinase isozyme G family protein [Populus trichocarpa]                                       |
| 1996 | 2199  | gi 225435169 | 82.4  | 9  | 3 | 1 | Carbamidomethylation | 42533  | PREDICTED: mitogen-activated protein kinase homolog NTF6 [Vitis vinifera]                            |
| 1297 | 18773 | gi 566148271 | 82.35 | 12 | 3 | 1 |                      | 25715  | nucleoside diphosphate kinase family protein [Populus trichocarpa]                                   |

|      |       |              |       |    |   |   |                      |       |                                                                                            |
|------|-------|--------------|-------|----|---|---|----------------------|-------|--------------------------------------------------------------------------------------------|
| 1368 | 18320 | gi 566166505 | 82.34 | 7  | 4 | 1 |                      | 65003 | hypothetical protein POPTR_0004s14530g [Populus trichocarpa]                               |
| 670  | 850   | gi 225450384 | 82.34 | 4  | 3 | 2 | Carbamidomethylation | 57022 | PREDICTED: beta-glucosidase 12-like [Vitis vinifera]                                       |
| 1973 | 2310  | gi 225427364 | 82.33 | 6  | 2 | 2 | Carbamidomethylation | 51132 | PREDICTED: poly(U)-specific endoribonuclease-B [Vitis vinifera]                            |
| 1818 | 17777 | gi 566153407 | 82.29 | 11 | 4 | 1 |                      | 42007 | ferredoxin-NADP reductase family protein [Populus trichocarpa]                             |
| 919  | 19219 | gi 566167417 | 82.29 | 11 | 2 | 2 |                      | 11431 | 60s acidic ribosomal family protein [Populus trichocarpa]                                  |
| 1836 | 2035  | gi 731402548 | 82.22 | 5  | 3 | 2 |                      | 91875 | PREDICTED: N-alpha-acetyltransferase 15 NatA auxiliary subunit isoform X3 [Vitis vinifera] |
| 1929 | 1167  | gi 225457034 | 82.16 | 9  | 3 | 3 | Carbamidomethylation | 51176 | PREDICTED: 1-deoxy-D-xylulose 5-phosphate reductoisomerase chloroplastic [Vitis vinifera]  |
| 1355 | 17249 | gi 566161432 | 82.04 | 4  | 3 | 2 |                      | 74324 | acyl-CoA oxidase family protein [Populus trichocarpa]                                      |
| 1626 | 18023 | gi 566255780 | 81.88 | 18 | 3 | 1 |                      | 16020 | actin-depolymerizing factor family protein [Populus trichocarpa]                           |
| 1699 | 18494 | gi 224066943 | 81.85 | 6  | 3 | 3 |                      | 35968 | annexin 1 family protein [Populus trichocarpa]                                             |
| 1463 | 18725 | gi 566211608 | 81.79 | 15 | 3 | 3 |                      | 30060 | hypothetical protein POPTR_0017s05720g [Populus trichocarpa]                               |
| 361  | 736   | gi 225455934 | 81.77 | 12 | 3 | 3 |                      | 20429 | PREDICTED: ribulose biphosphate carboxylase small chain chloroplastic [Vitis vinifera]     |
| 1296 | 18139 | gi 224107417 | 81.76 | 6  | 4 | 2 |                      | 57907 | dehydroquinase dehydratase family protein [Populus trichocarpa]                            |
| 1440 | 1542  | gi 225458237 | 81.71 | 9  | 2 | 1 | Carbamidomethylation | 29571 | PREDICTED: gamma carbonic anhydrase 1 mitochondrial [Vitis vinifera]                       |
| 1523 | 18334 | gi 566172110 | 81.69 | 12 | 3 | 3 | Carbamidomethylation | 39318 | casein kinase II alpha chain family protein [Populus trichocarpa]                          |
| 1553 | 19910 | gi 566152841 | 81.65 | 7  | 2 | 1 | Carbamidomethylation | 26914 | hypothetical protein POPTR_0001s34950g [Populus trichocarpa]                               |

|      |       |              |       |    |   |   |                      |       |                                                                     |
|------|-------|--------------|-------|----|---|---|----------------------|-------|---------------------------------------------------------------------|
| 990  | 705   | gi 225428009 | 81.65 | 10 | 3 | 1 | Carbamidomethylation | 31769 | PREDICTED: L-ascorbate peroxidase 3 peroxisomal [Vitis vinifera]    |
| 2457 | 28931 | gi 566162125 | 81.58 | 6  | 3 | 3 |                      | 86023 | hypothetical protein POPTR_0003s11300g [Populus trichocarpa]        |
| 1650 | 18022 | gi 224112819 | 81.51 | 21 | 3 | 1 | Carbamidomethylation | 16047 | actin-depolymerizing factor family protein [Populus trichocarpa]    |
| 2210 | 19110 | gi 566206676 | 81.49 | 3  | 2 | 2 |                      | 79072 | hypothetical protein POPTR_0015s08830g [Populus trichocarpa]        |
| 1546 | 17720 | gi 566197177 | 81.44 | 6  | 3 | 1 |                      | 52151 | geranylgeranyl reductase family protein [Populus trichocarpa]       |
| 1624 | 1629  | gi 359490763 | 81.43 | 9  | 3 | 3 | Carbamidomethylation | 39503 | PREDICTED: caffeic acid 3-O-methyltransferase [Vitis vinifera]      |
| 2053 | 18762 | gi 566160631 | 81.41 | 4  | 2 | 1 |                      | 73609 | endomembrane protein 70 [Populus trichocarpa]                       |
| 1834 | 18886 | gi 566175785 | 81.41 | 13 | 4 | 3 | Carbamidomethylation | 36260 | hypothetical protein POPTR_0006s11790g [Populus trichocarpa]        |
| 1718 | 1628  | gi 359482834 | 81.22 | 6  | 2 | 1 |                      | 49834 | PREDICTED: WD-40 repeat-containing protein MSI4 [Vitis vinifera]    |
| 1229 | 1386  | gi 225434203 | 81.18 | 11 | 4 | 1 | Carbamidomethylation | 38265 | PREDICTED: 2-alkenal reductase (NADP(+)-dependent) [Vitis vinifera] |
| 2001 | 18395 | gi 566182365 | 81.16 | 8  | 2 | 2 |                      | 34377 | hypothetical protein POPTR_0008s04660g [Populus trichocarpa]        |
| 1856 | 18691 | gi 671743260 | 81.11 | 20 | 3 | 3 |                      | 24165 | cytochrome b6 (chloroplast) [Camellia petelotii]                    |
| 1789 | 19451 | gi 566160279 | 81.04 | 5  | 1 | 1 |                      | 36389 | hypothetical protein POPTR_0003s01450g [Populus trichocarpa]        |
| 1461 | 17675 | gi 566198526 | 81    | 5  | 4 | 2 |                      | 67271 | hypothetical protein POPTR_0012s14780g [Populus trichocarpa]        |
| 1981 | 18830 | gi 566214901 | 81    | 10 | 2 | 2 | Oxidation (M)        | 35399 | hypothetical protein POPTR_0018s08850g [Populus trichocarpa]        |

|      |       |              |       |    |   |   |                      |        |                                                                                    |
|------|-------|--------------|-------|----|---|---|----------------------|--------|------------------------------------------------------------------------------------|
| 2119 | 18878 | gi 566200709 | 81    | 5  | 2 | 1 |                      | 63530  | putative beta-fructofuranosidase family protein [Populus trichocarpa]              |
| 1824 | 2099  | gi 225426826 | 80.97 | 7  | 2 | 1 |                      | 36763  | PREDICTED: replication factor C subunit 2 [Vitis vinifera]                         |
| 1358 | 17669 | gi 566185352 | 80.85 | 7  | 5 | 1 | Carbamidomethylation | 79054  | hypothetical protein POPTR_0008s22410g [Populus trichocarpa]                       |
| 2102 | 18659 | gi 224055093 | 80.66 | 13 | 2 | 2 |                      | 22171  | hypothetical protein POPTR_0001s26920g [Populus trichocarpa]                       |
| 1808 | 1820  | gi 359478076 | 80.51 | 7  | 3 | 2 | Carbamidomethylation | 68073  | PREDICTED: 2-isopropylmalate synthase A-like [Vitis vinifera]                      |
| 1843 | 2016  | gi 731410536 | 80.49 | 10 | 2 | 2 | Carbamidomethylation | 38859  | PREDICTED: protein RAE1 [Vitis vinifera]                                           |
| 1791 | 18556 | gi 224067088 | 80.48 | 8  | 3 | 3 | Carbamidomethylation | 73926  | hypothetical protein POPTR_0002s10850g [Populus trichocarpa]                       |
| 1896 | 18808 | gi 224141215 | 80.42 | 2  | 3 | 2 | Carbamidomethylation | 141876 | hypothetical protein POPTR_0017s07760g [Populus trichocarpa]                       |
| 1716 | 1435  | gi 225464870 | 80.39 | 9  | 2 | 2 | Carbamidomethylation | 37627  | PREDICTED: bifunctional nitrilase/nitrile hydratase NIT4B [Vitis vinifera]         |
| 2288 | 19080 | gi 225425274 | 80.38 | 7  | 2 | 2 |                      | 29736  | PREDICTED: cytochrome b-c1 complex subunit Rieske-4 mitochondrial [Vitis vinifera] |
| 2039 | 1858  | gi 359496003 | 80.26 | 7  | 3 | 3 |                      | 43409  | PREDICTED: probable transaldolase [Vitis vinifera]                                 |
| 1797 | 2328  | gi 225435249 | 80.22 | 13 | 2 | 2 |                      | 27570  | PREDICTED: proteasome subunit beta type-4 [Vitis vinifera]                         |
| 1145 | 981   | gi 225445442 | 80.19 | 9  | 3 | 1 |                      | 35854  | PREDICTED: NADH-cytochrome b5 reductase-like protein [Vitis vinifera]              |
| 1693 | 1664  | gi 225462058 | 80.05 | 7  | 4 | 1 | Carbamidomethylation | 83482  | PREDICTED: probable galactinol--sucrose galactosyltransferase 1 [Vitis vinifera]   |
| 1232 | 17648 | gi 566184227 | 80.01 | 5  | 2 | 1 |                      | 64966  | pyruvate phosphotransferase family protein [Populus trichocarpa]                   |

|      |       |              |       |    |   |   |                      |       |                                                                                            |
|------|-------|--------------|-------|----|---|---|----------------------|-------|--------------------------------------------------------------------------------------------|
| 2326 | 29454 | gi 225438605 | 79.98 | 4  | 1 | 1 | Carbamidomethylation | 51322 | PREDICTED: alanine--glyoxylate aminotransferase 2 homolog 1 mitochondrial [Vitis vinifera] |
| 1057 | 719   | gi 225424242 | 79.97 | 40 | 4 | 1 |                      | 10611 | PREDICTED: 10 kDa chaperonin [Vitis vinifera]                                              |
| 1777 | 18705 | gi 224058237 | 79.64 | 6  | 2 | 1 |                      | 68244 | Dynamin-like family protein [Populus trichocarpa]                                          |
| 1361 | 2560  | gi 225428263 | 79.58 | 26 | 3 | 3 |                      | 14294 | PREDICTED: small nuclear ribonucleoprotein Sm D3 [Vitis vinifera]                          |
| 1456 | 1732  | gi 225461632 | 79.55 | 6  | 2 | 2 |                      | 44771 | PREDICTED: uncharacterized protein At3g15000 mitochondrial [Vitis vinifera]                |
| 2000 | 18794 | gi 224066629 | 79.48 | 16 | 2 | 2 |                      | 16281 | thioredoxin family protein [Populus trichocarpa]                                           |
| 1952 | 1546  | gi 225460837 | 79.44 | 7  | 2 | 2 |                      | 43944 | PREDICTED: cell division protein FtsZ homolog 1 chloroplastic [Vitis vinifera]             |
| 1012 | 1320  | gi 731440862 | 79.43 | 25 | 3 | 3 | Carbamidomethylation | 15642 | PREDICTED: 60S ribosomal protein L32-1 [Vitis vinifera]                                    |
| 2084 | 18882 | gi 224075096 | 79.36 | 4  | 2 | 2 | Carbamidomethylation | 73889 | acyl-coA synthetase family protein [Populus trichocarpa]                                   |
| 1449 | 28940 | gi 566162305 | 79.14 | 8  | 3 | 1 | Carbamidomethylation | 38904 | UDP-glucose 4-epimerase family protein [Populus trichocarpa]                               |
| 1822 | 1102  | gi 225452700 | 79.14 | 10 | 4 | 2 |                      | 29376 | PREDICTED: mitochondrial outer membrane protein porin of 34 kDa [Vitis vinifera]           |
| 2064 | 17582 | gi 566179618 | 79.08 | 5  | 2 | 2 |                      | 48055 | hypothetical protein POPTR_0007s04700g [Populus trichocarpa]                               |
| 1337 | 18971 | gi 566214594 | 78.93 | 10 | 4 | 1 |                      | 54543 | phosphofructokinase family protein [Populus trichocarpa]                                   |
| 1804 | 18317 | gi 566147070 | 78.87 | 9  | 3 | 3 |                      | 32560 | hypothetical protein POPTR_0001s03780g [Populus trichocarpa]                               |
| 2030 | 18372 | gi 566167797 | 78.83 | 12 | 3 | 2 |                      | 29714 | hypothetical protein POPTR_0004s21400g [Populus trichocarpa]                               |

|      |       |              |       |    |   |   |                      |        |                                                                                        |
|------|-------|--------------|-------|----|---|---|----------------------|--------|----------------------------------------------------------------------------------------|
| 1907 | 28956 | gi 359482292 | 78.8  | 6  | 3 | 1 |                      | 66341  | PREDICTED: threonine dehydratase biosynthetic chloroplastic [Vitis vinifera]           |
| 1838 | 2997  | gi 225455529 | 78.77 | 19 | 3 | 1 | Carbamidomethylation | 17124  | PREDICTED: 40S ribosomal protein S13 [Vitis vinifera]                                  |
| 1883 | 2117  | gi 225465870 | 78.71 | 1  | 2 | 1 |                      | 205009 | PREDICTED: DNA-directed RNA polymerase V subunit 1 [Vitis vinifera]                    |
| 1628 | 2095  | gi 225447745 | 78.7  | 11 | 2 | 2 |                      | 27216  | PREDICTED: chlorophyll a-b binding protein CP24 10A chloroplastic [Vitis vinifera]     |
| 2094 | 1372  | gi 225462440 | 78.58 | 5  | 4 | 3 | Carbamidomethylation | 107317 | PREDICTED: serine/threonine-protein phosphatase BSL3 [Vitis vinifera]                  |
| 1381 | 1304  | gi 359475330 | 78.53 | 14 | 2 | 2 |                      | 16329  | PREDICTED: glycine-rich RNA-binding protein GRP2A [Vitis vinifera]                     |
| 2479 | 29080 | gi 566191056 | 78.49 | 6  | 2 | 2 | Carbamidomethylation | 53716  | serine carboxypeptidase S10 family protein [Populus trichocarpa]                       |
| 1686 | 2088  | gi 731379285 | 78.45 | 15 | 3 | 3 |                      | 27000  | PREDICTED: probable phospholipid hydroperoxide glutathione peroxidase [Vitis vinifera] |
| 756  | 992   | gi 225441912 | 78.41 | 12 | 4 | 2 |                      | 30951  | PREDICTED: S-formylglutathione hydrolase isoform X4 [Vitis vinifera]                   |
| 1622 | 18313 | gi 224053607 | 78.4  | 11 | 3 | 1 |                      | 34050  | EXGT1 family protein [Populus trichocarpa]                                             |
| 1512 | 857   | gi 225424598 | 78.13 | 16 | 3 | 3 | Carbamidomethylation | 29498  | PREDICTED: proteasome subunit beta type-7-A [Vitis vinifera]                           |
| 1610 | 3914  | gi 225428111 | 78.12 | 9  | 3 | 1 |                      | 39867  | PREDICTED: 24-methylenesterol C-methyltransferase 2 [Vitis vinifera]                   |
| 1367 | 2725  | gi 359475312 | 77.9  | 6  | 4 | 2 |                      | 50616  | PREDICTED: cyclase-associated protein 1 [Vitis vinifera]                               |
| 1687 | 29004 | gi 566163578 | 77.89 | 1  | 3 | 1 |                      | 212580 | hypothetical protein POPTR_0003s19630g [Populus trichocarpa]                           |

|      |       |              |       |    |   |   |                      |        |                                                                                            |
|------|-------|--------------|-------|----|---|---|----------------------|--------|--------------------------------------------------------------------------------------------|
| 2350 | 29029 | gi 224111756 | 77.85 | 4  | 2 | 2 |                      | 67310  | hypothetical protein POPTR_0010s14130g [Populus trichocarpa]                               |
| 1684 | 1904  | gi 225431685 | 77.82 | 5  | 4 | 1 |                      | 92333  | PREDICTED: probable methyltransferase PMT26 [Vitis vinifera]                               |
| 2163 | 23457 | gi 731425791 | 77.82 | 8  | 3 | 3 |                      | 30802  | PREDICTED: NAP1-related protein 2 [Vitis vinifera]                                         |
| 1864 | 18439 | gi 224081475 | 77.68 | 5  | 2 | 2 |                      | 58488  | hypothetical protein POPTR_0005s10320g [Populus trichocarpa]                               |
| 1651 | 1526  | gi 225440674 | 77.68 | 9  | 2 | 1 | Carbamidomethylation | 31431  | PREDICTED: chlorophyll a-b binding protein CP29.1 chloroplastic [Vitis vinifera]           |
| 1922 | 1847  | gi 731389447 | 77.64 | 4  | 2 | 1 |                      | 84064  | PREDICTED: acylamino-acid-releasing enzyme isoform X2 [Vitis vinifera]                     |
| 2082 | 29002 | gi 566239233 | 77.61 | 4  | 2 | 2 |                      | 94826  | aspartate kinase family protein [Populus trichocarpa]                                      |
| 1888 | 17748 | gi 566214622 | 77.59 | 5  | 2 | 1 |                      | 51313  | WD-40 repeat protein MSI4 [Populus trichocarpa]                                            |
| 1840 | 18330 | gi 566234718 | 77.45 | 2  | 2 | 1 |                      | 124541 | exportin1 family protein [Populus trichocarpa]                                             |
| 1536 | 837   | gi 731425891 | 77.45 | 12 | 3 | 2 |                      | 31554  | PREDICTED: hypersensitive-induced response protein 1 isoform X2 [Vitis vinifera]           |
| 1770 | 17545 | gi 566169569 | 77.43 | 2  | 2 | 1 | Carbamidomethylation | 117048 | transport Sec24 family protein [Populus trichocarpa]                                       |
| 1820 | 18205 | gi 224054120 | 77.31 | 5  | 3 | 1 |                      | 73852  | lecithin:cholesterol acyltransferase family protein [Populus trichocarpa]                  |
| 2010 | 2331  | gi 731432527 | 77.31 | 10 | 2 | 2 |                      | 26117  | PREDICTED: DAG protein chloroplastic [Vitis vinifera]                                      |
| 1938 | 17861 | gi 566214720 | 77.15 | 10 | 2 | 1 |                      | 27275  | Eukaryotic translation initiation factor 3 subunit 11 family protein [Populus trichocarpa] |
| 1805 | 1796  | gi 225434189 | 77.1  | 9  | 3 | 1 | Carbamidomethylation | 38648  | PREDICTED: 2-alkenal reductase (NADP(+)-dependent) [Vitis vinifera]                        |
| 1432 | 18489 | gi 224080381 | 77.08 | 8  | 3 | 3 |                      | 53896  | diaminopimelate decarboxylase family protein [Populus trichocarpa]                         |



|      |       |              |       |    |   |   |                      |       |                                                                                           |
|------|-------|--------------|-------|----|---|---|----------------------|-------|-------------------------------------------------------------------------------------------|
| 1343 | 18959 | gi 566176600 | 77.04 | 8  | 4 | 1 |                      | 60686 | hypothetical protein POPTR_0006s15730g [Populus trichocarpa]                              |
| 1776 | 1975  | gi 731432424 | 77.02 | 4  | 4 | 4 |                      | 90087 | PREDICTED: ubiquitin carboxyl-terminal hydrolase 14 [Vitis vinifera]                      |
| 1633 | 18136 | gi 224109362 | 76.98 | 10 | 2 | 1 |                      | 31536 | Eukaryotic translation initiation factor 3 subunit 5 family protein [Populus trichocarpa] |
| 1994 | 2000  | gi 731418793 | 76.93 | 10 | 5 | 1 |                      | 59155 | PREDICTED: glucose-6-phosphate 1-dehydrogenase cytoplasmic isoform [Vitis vinifera]       |
| 1965 | 28917 | gi 225454787 | 76.88 | 8  | 4 | 3 |                      | 61899 | PREDICTED: 4-coumarate--CoA ligase 2 [Vitis vinifera]                                     |
| 1844 | 19010 | gi 566191106 | 76.85 | 3  | 2 | 1 | Carbamidomethylation | 83138 | hypothetical protein POPTR_0010s16220g [Populus trichocarpa]                              |
| 2345 | 1879  | gi 359492060 | 76.75 | 7  | 3 | 3 | Carbamidomethylation | 46276 | PREDICTED: polyadenylate-binding protein RBP47-like [Vitis vinifera]                      |
| 1320 | 17944 | gi 224093408 | 76.74 | 13 | 2 | 1 | Carbamidomethylation | 18464 | hypothetical protein POPTR_0007s04160g [Populus trichocarpa]                              |
| 1485 | 18451 | gi 224089557 | 76.66 | 8  | 3 | 1 | Carbamidomethylation | 42428 | truncated acetyl Co-A acetyltransferase-like family protein [Populus trichocarpa]         |
| 2067 | 1203  | gi 731391355 | 76.62 | 5  | 3 | 3 |                      | 85892 | PREDICTED: LETM1 and EF-hand domain-containing protein 1 mitochondrial [Vitis vinifera]   |
| 1727 | 28910 | gi 566206175 | 76.44 | 12 | 4 | 1 | Carbamidomethylation | 41940 | Actin-related family protein [Populus trichocarpa]                                        |
| 2150 | 28945 | gi 225445462 | 76.34 | 24 | 3 | 1 |                      | 14555 | PREDICTED: uncharacterized protein At2g34160 [Vitis vinifera]                             |
| 1951 | 18690 | gi 566167629 | 76.29 | 8  | 2 | 2 | Carbamidomethylation | 40491 | homoserine dehydrogenase family protein [Populus trichocarpa]                             |
| 1253 | 1075  | gi 526117894 | 76.2  | 8  | 4 | 1 |                      | 36735 | anthocyanidin reductase [Vitis vinifera]                                                  |
| 1649 | 28950 | gi 359483854 | 76.02 | 6  | 3 | 1 | Carbamidomethylation | 49342 | PREDICTED: 3-oxoacyl-[acyl-carrier-protein] synthase I chloroplastic [Vitis vinifera]     |

|      |       |              |       |    |   |   |                      |        |                                                                                               |
|------|-------|--------------|-------|----|---|---|----------------------|--------|-----------------------------------------------------------------------------------------------|
| 1284 | 28933 | gi 566151363 | 76    | 4  | 4 | 1 |                      | 120035 | C2 domain-containing family protein [Populus trichocarpa]                                     |
| 1695 | 18180 | gi 566186687 | 75.9  | 9  | 3 | 1 |                      | 39152  | hypothetical protein POPTR_0009s06780g [Populus trichocarpa]                                  |
| 1697 | 18176 | gi 566175819 | 75.85 | 6  | 3 | 1 |                      | 67279  | hypothetical protein POPTR_0006s11980g [Populus trichocarpa]                                  |
| 2272 | 19555 | gi 566215053 | 75.84 | 12 | 3 | 1 |                      | 30007  | hypothetical protein POPTR_0018s09700g [Populus trichocarpa]                                  |
| 738  | 17884 | gi 224066487 | 75.78 | 14 | 3 | 3 |                      | 17636  | hypothetical protein POPTR_0002s05220g [Populus trichocarpa]                                  |
| 1698 | 19081 | gi 566197479 | 75.7  | 6  | 2 | 1 |                      | 60216  | ethylene-responsive DEAD box RNA helicase family protein [Populus trichocarpa]                |
| 1022 | 1812  | gi 225430510 | 75.68 | 6  | 3 | 1 |                      | 27121  | PREDICTED: phospholipid hydroperoxide glutathione peroxidase 1 chloroplastic [Vitis vinifera] |
| 1769 | 29034 | gi 566203845 | 75.65 | 9  | 2 | 2 |                      | 41752  | hypothetical protein POPTR_0014s11810g [Populus trichocarpa]                                  |
| 1679 | 1439  | gi 731428465 | 75.63 | 8  | 4 | 4 |                      | 37487  | PREDICTED: thylakoid luminal 29 kDa protein chloroplastic [Vitis vinifera]                    |
| 1923 | 2049  | gi 731411015 | 75.61 | 8  | 2 | 1 |                      | 46869  | PREDICTED: 3-isopropylmalate dehydrogenase chloroplastic [Vitis vinifera]                     |
| 2134 | 29290 | gi 224141019 | 75.6  | 6  | 2 | 1 |                      | 57002  | cystathionine gamma synthase family protein [Populus trichocarpa]                             |
| 1529 | 18144 | gi 224073967 | 75.6  | 12 | 2 | 2 |                      | 15188  | photosystem I 11K family protein [Populus trichocarpa]                                        |
| 1578 | 1299  | gi 731419061 | 75.56 | 3  | 2 | 1 |                      | 94432  | PREDICTED: ATP-dependent RNA helicase-like protein DB10 isoform X2 [Vitis vinifera]           |
| 1734 | 1567  | gi 225433215 | 75.43 | 9  | 2 | 2 | Carbamidomethylation | 26277  | PREDICTED: DAG protein chloroplastic [Vitis vinifera]                                         |

|      |       |              |       |    |   |   |                      |        |                                                                               |
|------|-------|--------------|-------|----|---|---|----------------------|--------|-------------------------------------------------------------------------------|
| 2077 | 1581  | gi 731408703 | 75.36 | 7  | 3 | 3 | Carbamidomethylation | 54961  | PREDICTED: serine/threonine-protein phosphatase 5 isoform X2 [Vitis vinifera] |
| 2156 | 18462 | gi 566192083 | 75.3  | 3  | 2 | 1 | Carbamidomethylation | 111427 | transport protein Sec24 [Populus trichocarpa]                                 |
| 1563 | 1382  | gi 359489656 | 75.3  | 6  | 2 | 2 |                      | 52031  | PREDICTED: probable polygalacturonase [Vitis vinifera]                        |
| 1936 | 2203  | gi 731387671 | 75.28 | 7  | 2 | 2 | Carbamidomethylation | 39674  | PREDICTED: thioredoxin reductase NTRB-like [Vitis vinifera]                   |
| 1908 | 20223 | gi 225456266 | 75.26 | 6  | 4 | 1 |                      | 53511  | PREDICTED: probable aspartyl aminopeptidase [Vitis vinifera]                  |
| 2250 | 1362  | gi 225440230 | 75.24 | 10 | 2 | 2 | Carbamidomethylation | 29238  | PREDICTED: dihydrofolate reductase [Vitis vinifera]                           |
| 2149 | 28941 | gi 225469630 | 75.13 | 8  | 3 | 2 |                      | 61225  | PREDICTED: EH domain-containing protein 3-like [Vitis vinifera]               |
| 1144 | 920   | gi 225436438 | 75.1  | 34 | 3 | 3 |                      | 10607  | PREDICTED: cyclin-dependent kinases regulatory subunit 1 [Vitis vinifera]     |
| 1138 | 18449 | gi 566155267 | 75.08 | 5  | 3 | 2 |                      | 41202  | hypothetical protein POPTR_0001s46720g [Populus trichocarpa]                  |
| 1616 | 18677 | gi 566167809 | 74.96 | 9  | 2 | 1 |                      | 40197  | ISOCITRATE DEHYDROGENASE SUBUNIT 2 family protein [Populus trichocarpa]       |
| 2584 | 2872  | gi 359483619 | 74.84 | 17 | 2 | 2 |                      | 15087  | PREDICTED: prefoldin subunit 6 [Vitis vinifera]                               |
| 951  | 18170 | gi 566157284 | 74.7  | 4  | 2 | 1 | Carbamidomethylation | 48713  | chloroplast nucleoid DNA-binding family protein [Populus trichocarpa]         |
| 1678 | 18410 | gi 566146519 | 74.69 | 3  | 3 | 1 |                      | 118989 | glycosyl hydrolase family 31 family protein [Populus trichocarpa]             |
| 1309 | 18273 | gi 224106686 | 74.69 | 10 | 2 | 1 |                      | 24434  | elongation factor 1B alpha-subunit 2 family protein [Populus trichocarpa]     |
| 2541 | 17937 | gi 224101127 | 74.46 | 10 | 2 | 1 | Carbamidomethylation | 30103  | Chlorophyll a-b binding protein CP29.3 [Populus trichocarpa]                  |
| 2586 | 18467 | gi 566253285 | 74.44 | 9  | 2 | 1 |                      | 36419  | hypothetical protein POPTR_1567s00200g partial [Populus trichocarpa]          |

|      |       |              |       |    |   |   |                      |       |                                                                                           |
|------|-------|--------------|-------|----|---|---|----------------------|-------|-------------------------------------------------------------------------------------------|
| 1590 | 1079  | gi 225445949 | 74.3  | 8  | 4 | 3 | Carbamidomethylation | 49372 | PREDICTED: KH domain-containing protein At4g18375 [Vitis vinifera]                        |
| 981  | 17667 | gi 224086942 | 74.19 | 12 | 4 | 2 | Carbamidomethylation | 31883 | putative esterase D family protein [Populus trichocarpa]                                  |
| 1690 | 18861 | gi 566159684 | 74.19 | 4  | 2 | 1 | Oxidation (M)        | 72140 | hypothetical protein POPTR_0002s23950g [Populus trichocarpa]                              |
| 2093 | 28935 | gi 225459762 | 74.17 | 9  | 3 | 1 |                      | 40307 | PREDICTED: 24-methylenesterol C-methyltransferase 2 [Vitis vinifera]                      |
| 1667 | 979   | gi 731416996 | 74.11 | 7  | 3 | 2 |                      | 46827 | PREDICTED: poly(rC)-binding protein 3 [Vitis vinifera]                                    |
| 2251 | 1725  | gi 225430834 | 74.11 | 4  | 2 | 1 |                      | 71703 | PREDICTED: probable Xaa-Pro aminopeptidase P [Vitis vinifera]                             |
| 1639 | 1412  | gi 225427234 | 74.08 | 14 | 2 | 1 |                      | 17554 | PREDICTED: glycine cleavage system H protein mitochondrial [Vitis vinifera]               |
| 1557 | 1384  | gi 225437898 | 74.04 | 15 | 3 | 2 |                      | 15168 | PREDICTED: photosystem I reaction center subunit IV B chloroplastic-like [Vitis vinifera] |
| 1652 | 18675 | gi 566175530 | 74.02 | 8  | 2 | 1 | Carbamidomethylation | 39660 | hypothetical protein POPTR_0006s10360g [Populus trichocarpa]                              |
| 2097 | 5417  | gi 731391337 | 73.95 | 9  | 3 | 1 | Carbamidomethylation | 45764 | PREDICTED: mitogen-activated protein kinase homolog MMK1 [Vitis vinifera]                 |
| 1898 | 19056 | gi 731418338 | 73.76 | 3  | 2 | 2 |                      | 84933 | PREDICTED: acetyl-coenzyme A synthetase chloroplastic/glyoxysomal [Vitis vinifera]        |
| 1750 | 1309  | gi 731398937 | 73.54 | 15 | 2 | 1 | Carbamidomethylation | 21183 | PREDICTED: actin-depolymerizing factor 1-like [Vitis vinifera]                            |
| 2087 | 1375  | gi 359487733 | 73.48 | 6  | 2 | 1 |                      | 46705 | PREDICTED: amidase 1 [Vitis vinifera]                                                     |
| 1867 | 1545  | gi 225451299 | 73.42 | 10 | 2 | 2 |                      | 30245 | PREDICTED: probable ribose-5-phosphate isomerase 3 chloroplastic [Vitis vinifera]         |

|      |       |              |       |    |   |   |                                     |       |                                                                               |
|------|-------|--------------|-------|----|---|---|-------------------------------------|-------|-------------------------------------------------------------------------------|
| 1848 | 29179 | gi 566195867 | 73.33 | 6  | 2 | 1 |                                     | 52643 | hypothetical protein POPTR_0011s16630g [Populus trichocarpa]                  |
| 2268 | 19500 | gi 224074887 | 73.32 | 8  | 2 | 1 |                                     | 36489 | replication factor C 40 kDa family protein [Populus trichocarpa]              |
| 1949 | 17722 | gi 566203642 | 73.3  | 8  | 3 | 3 | Carbamidomethylation                | 61529 | hypothetical protein POPTR_0014s10720g [Populus trichocarpa]                  |
| 2219 | 5132  | gi 225442452 | 73.29 | 4  | 2 | 1 |                                     | 54242 | PREDICTED: hexokinase-2 [Vitis vinifera]                                      |
| 1715 | 18678 | gi 566210985 | 73.26 | 6  | 2 | 1 | Carbamidomethylation                | 51941 | glycosyl hydrolase family 17 family protein [Populus trichocarpa]             |
| 2459 | 900   | gi 225446797 | 73.17 | 5  | 2 | 2 |                                     | 55221 | PREDICTED: switch-associated protein 70 [Vitis vinifera]                      |
| 1438 | 17581 | gi 566187534 | 73.13 | 5  | 3 | 1 |                                     | 50027 | cyclase associated protein 1 [Populus trichocarpa]                            |
| 1599 | 998   | gi 225435024 | 73    | 13 | 3 | 2 |                                     | 25842 | PREDICTED: THO complex subunit 4A [Vitis vinifera]                            |
| 2816 | 29115 | gi 566149039 | 72.99 | 12 | 2 | 1 | Carbamidomethylation                | 22002 | hypothetical protein POPTR_0001s14940g partial [Populus trichocarpa]          |
| 1983 | 29203 | gi 225440590 | 72.94 | 8  | 2 | 1 | Carbamidomethylation                | 32488 | PREDICTED: mitochondrial uncoupling protein 1 [Vitis vinifera]                |
| 2184 | 18308 | gi 731406703 | 72.84 | 7  | 3 | 3 | Carbamidomethylation; Oxidation (M) | 66565 | PREDICTED: arginine--tRNA ligase cytoplasmic-like isoform X2 [Vitis vinifera] |
| 1893 | 1576  | gi 225427798 | 72.82 | 6  | 3 | 1 | Carbamidomethylation                | 62899 | PREDICTED: amidophosphoribosyltransferase chloroplastic [Vitis vinifera]      |
| 2478 | 2043  | gi 225428141 | 72.57 | 5  | 2 | 2 |                                     | 68945 | PREDICTED: SEC1 family transport protein SLY1 [Vitis vinifera]                |
| 1934 | 17898 | gi 566255384 | 72.54 | 8  | 2 | 1 |                                     | 37527 | hypothetical protein POPTR_0584s00210g [Populus trichocarpa]                  |
| 1788 | 18006 | gi 224141351 | 72.48 | 3  | 2 | 1 |                                     | 68914 | Structure-specific recognition protein 1 [Populus trichocarpa]                |
| 2197 | 1499  | gi 225456248 | 72.47 | 9  | 2 | 1 |                                     | 34358 | PREDICTED: 3-oxoacyl-[acyl-carrier-protein] reductase 4 [Vitis vinifera]      |

|      |       |              |       |    |   |   |                                        |       |                                                                                          |
|------|-------|--------------|-------|----|---|---|----------------------------------------|-------|------------------------------------------------------------------------------------------|
| 2352 | 29220 | gi 224084852 | 72.42 | 44 | 2 | 2 |                                        | 10061 | hypothetical protein POPTR_0005s16040g [Populus trichocarpa]                             |
| 1613 | 28977 | gi 224092186 | 72.41 | 17 | 3 | 3 | Carbamidomethylation                   | 21905 | eukaryotic translation initiation factor SUI1 family protein [Populus trichocarpa]       |
| 2123 | 18710 | gi 224065729 | 72.37 | 15 | 2 | 2 |                                        | 24619 | hypothetical protein POPTR_0002s01660g [Populus trichocarpa]                             |
| 1597 | 28918 | gi 566164041 | 72.35 | 5  | 4 | 1 |                                        | 88406 | hypothetical protein POPTR_0003s22060g [Populus trichocarpa]                             |
| 2088 | 19366 | gi 566184879 | 72.33 | 19 | 2 | 1 |                                        | 19164 | hypothetical protein POPTR_0008s19410g [Populus trichocarpa]                             |
| 2154 | 18206 | gi 566207525 | 72.3  | 4  | 3 | 1 | Carbamidomethylation                   | 83959 | subtilase family protein [Populus trichocarpa]                                           |
| 2098 | 19938 | gi 566166867 | 71.98 | 5  | 3 | 3 |                                        | 59346 | dihydrofolate reductase-thymidylate synthase family protein [Populus trichocarpa]        |
| 1659 | 19350 | gi 224073782 | 71.96 | 9  | 1 | 1 | Carbamidomethylation                   | 21868 | proline-rich family protein [Populus trichocarpa]                                        |
| 1956 | 956   | gi 225434949 | 71.91 | 26 | 2 | 1 |                                        | 10898 | PREDICTED: mitochondrial import inner membrane translocase subunit Tim9 [Vitis vinifera] |
| 2002 | 1623  | gi 225437378 | 71.84 | 17 | 2 | 2 | Carbamidomethylation                   | 11879 | PREDICTED: small nuclear ribonucleoprotein Sm D2-like [Vitis vinifera]                   |
| 1809 | 2410  | gi 731412185 | 71.8  | 6  | 2 | 1 | Carbamidomethylation                   | 67073 | PREDICTED: phosphoinositide phospholipase C 6 [Vitis vinifera]                           |
| 1953 | 2576  | gi 731430343 | 71.67 | 7  | 2 | 1 | Carbamidomethylation;<br>Oxidation (M) | 47441 | PREDICTED: histidinol dehydrogenase chloroplastic isoform X7 [Vitis vinifera]            |
| 1866 | 1021  | gi 731389102 | 71.63 | 7  | 2 | 2 | Carbamidomethylation                   | 39883 | PREDICTED: ATP-dependent (S)-NAD(P)H-hydrate dehydratase [Vitis vinifera]                |
| 2273 | 29082 | gi 526117529 | 71.54 | 10 | 2 | 2 | Carbamidomethylation                   | 27234 | caffeoyl-CoA O-methyltransferase [Vitis vinifera]                                        |
| 2130 | 29186 | gi 225430017 | 71.46 | 5  | 2 | 1 |                                        | 52717 | PREDICTED: la protein 1 [Vitis vinifera]                                                 |

|      |       |              |       |    |   |   |                      |        |                                                                                      |
|------|-------|--------------|-------|----|---|---|----------------------|--------|--------------------------------------------------------------------------------------|
| 1464 | 1262  | gi 731436828 | 71.45 | 10 | 3 | 2 | Carbamidomethylation | 57638  | PREDICTED: ATP-dependent 6-phosphofructokinase 5 chloroplastic-like [Vitis vinifera] |
| 1931 | 1686  | gi 225456369 | 71.41 | 15 | 3 | 3 |                      | 23558  | PREDICTED: nuclear transcription factor Y subunit C-1 isoform X1 [Vitis vinifera]    |
| 601  | 1367  | gi 526118089 | 71.36 | 11 | 3 | 3 |                      | 17263  | type II peroxiredoxin C [Vitis vinifera]                                             |
| 1928 | 28916 | gi 359474156 | 71.19 | 10 | 4 | 1 |                      | 54166  | PREDICTED: monodehydroascorbate reductase chloroplastic isoform X2 [Vitis vinifera]  |
| 1975 | 2401  | gi 225449382 | 71.18 | 11 | 3 | 3 |                      | 33427  | PREDICTED: eukaryotic translation initiation factor 3 subunit G [Vitis vinifera]     |
| 1976 | 19002 | gi 224103819 | 71.14 | 7  | 2 | 2 |                      | 34955  | L-galactose dehydrogenase family protein [Populus trichocarpa]                       |
| 2206 | 18458 | gi 566160637 | 71.11 | 3  | 2 | 1 |                      | 89989  | hypothetical protein POPTR_0003s03120g [Populus trichocarpa]                         |
| 1728 | 1845  | gi 225434277 | 71.06 | 13 | 3 | 3 |                      | 22623  | PREDICTED: CBS domain-containing protein CBSX3 mitochondrial [Vitis vinifera]        |
| 1700 | 1798  | gi 225442268 | 71    | 3  | 2 | 1 |                      | 73167  | PREDICTED: transmembrane 9 superfamily member 7 [Vitis vinifera]                     |
| 2027 | 18628 | gi 566194620 | 70.95 | 1  | 2 | 2 | Carbamidomethylation | 411805 | hypothetical protein POPTR_0011s09640g [Populus trichocarpa]                         |
| 1467 | 2306  | gi 526117918 | 70.9  | 5  | 1 | 1 |                      | 33457  | basic endochitinase precursor [Vitis vinifera]                                       |
| 1601 | 18207 | gi 224077052 | 70.88 | 2  | 2 | 2 |                      | 121102 | guanylate-binding family protein [Populus trichocarpa]                               |
| 655  | 1307  | gi 225463506 | 70.8  | 7  | 2 | 2 |                      | 38294  | PREDICTED: fructose-bisphosphate aldolase cytoplasmic isozyme 1 [Vitis vinifera]     |
| 1382 | 18711 | gi 224128708 | 70.78 | 7  | 2 | 1 |                      | 33828  | xyloglucan endo-1 family protein [Populus trichocarpa]                               |
| 792  | 1269  | gi 225459906 | 70.77 | 5  | 2 | 1 |                      | 34942  | PREDICTED: probable fructokinase-5 [Vitis vinifera]                                  |

|      |       |              |       |    |   |   |                      |        |                                                                                            |
|------|-------|--------------|-------|----|---|---|----------------------|--------|--------------------------------------------------------------------------------------------|
| 2157 | 19551 | gi 224073260 | 70.77 | 23 | 2 | 2 |                      | 10707  | small nuclear ribonucleoprotein D [Populus trichocarpa]                                    |
| 758  | 18717 | gi 224059156 | 70.74 | 18 | 2 | 1 |                      | 14119  | Profilin 3 family protein [Populus trichocarpa]                                            |
| 2346 | 20591 | gi 566167733 | 70.74 | 12 | 3 | 3 |                      | 33452  | NITRILASE-LIKE protein 1 [Populus trichocarpa]                                             |
| 1130 | 28982 | gi 225432556 | 70.7  | 9  | 4 | 3 | Carbamidomethylation | 49609  | PREDICTED: NEDD8-activating enzyme E1 catalytic subunit [Vitis vinifera]                   |
| 2004 | 1611  | gi 731417625 | 70.61 | 12 | 2 | 2 |                      | 19282  | PREDICTED: uncharacterized protein LOC100241624 [Vitis vinifera]                           |
| 2115 | 1643  | gi 225452186 | 70.61 | 9  | 3 | 3 |                      | 30725  | PREDICTED: prohibitin-3 mitochondrial [Vitis vinifera]                                     |
| 427  | 2534  | gi 731417951 | 70.58 | 8  | 2 | 2 |                      | 27594  | PREDICTED: allene oxide cyclase [Vitis vinifera]                                           |
| 1356 | 20587 | gi 566186995 | 70.49 | 11 | 3 | 3 |                      | 33415  | hypothetical protein POPTR_0009s08480g [Populus trichocarpa]                               |
| 1689 | 1218  | gi 731413519 | 70.44 | 5  | 2 | 2 |                      | 48243  | PREDICTED: vacuolar protein sorting-associated protein 4 [Vitis vinifera]                  |
| 1220 | 18715 | gi 224107783 | 70.44 | 12 | 2 | 1 | Carbamidomethylation | 16476  | hypothetical protein POPTR_0010s05590g [Populus trichocarpa]                               |
| 471  | 18787 | gi 224146534 | 70.39 | 9  | 3 | 1 | Oxidation (M)        | 29228  | hypothetical protein POPTR_0019s12390g [Populus trichocarpa]                               |
| 2275 | 1165  | gi 225428566 | 70.3  | 5  | 2 | 1 | Carbamidomethylation | 52523  | PREDICTED: 4-hydroxy-3-methylbut-2-enyl diphosphate reductase chloroplast [Vitis vinifera] |
| 2055 | 18879 | gi 566193798 | 70.11 | 3  | 2 | 2 |                      | 49306  | thioredoxin family protein [Populus trichocarpa]                                           |
| 2036 | 1192  | gi 731382587 | 70.07 | 2  | 2 | 1 |                      | 119503 | PREDICTED: epidermal growth factor receptor substrate 15-like 1 [Vitis vinifera]           |
| 1927 | 1971  | gi 359492139 | 70.05 | 5  | 4 | 1 |                      | 94211  | PREDICTED: probable methyltransferase PMT24 [Vitis vinifera]                               |



|      |       |              |       |    |   |   |                      |        |                                                                                                                              |
|------|-------|--------------|-------|----|---|---|----------------------|--------|------------------------------------------------------------------------------------------------------------------------------|
| 1837 | 2961  | gi 225429736 | 70    | 6  | 3 | 3 | Carbamidomethylation | 60112  | PREDICTED: 3-ketoacyl-CoA synthase 10 [Vitis vinifera]                                                                       |
| 2539 | 29030 | gi 224110036 | 69.96 | 9  | 2 | 1 |                      | 30282  | uridylyltransferase-related family protein [Populus trichocarpa]                                                             |
| 2266 | 18407 | gi 566158256 | 69.96 | 8  | 3 | 2 | Carbamidomethylation | 39552  | hypothetical protein POPTR_0002s15850g [Populus trichocarpa]                                                                 |
| 2120 | 18682 | gi 224146371 | 69.96 | 3  | 2 | 1 |                      | 63347  | putative beta-fructofuranosidase family protein [Populus trichocarpa]                                                        |
| 2511 | 29064 | gi 225426649 | 69.94 | 8  | 2 | 2 |                      | 35134  | PREDICTED: uncharacterized protein LOC100244375 [Vitis vinifera]                                                             |
| 2296 | 18765 | gi 566188404 | 69.81 | 9  | 3 | 3 | Carbamidomethylation | 40604  | pantothenate kinase-related family protein [Populus trichocarpa]                                                             |
| 1849 | 1609  | gi 225437963 | 69.76 | 6  | 2 | 2 |                      | 43931  | PREDICTED: NADH dehydrogenase [ubiquinone] 1 alpha subcomplex subunit 9 mitochondrial [Vitis vinifera]                       |
| 2213 | 19437 | gi 566192561 | 69.66 | 7  | 2 | 1 |                      | 32755  | hypothetical protein POPTR_0010s24480g [Populus trichocarpa]                                                                 |
| 2046 | 1861  | gi 731428311 | 69.55 | 9  | 3 | 2 |                      | 51458  | PREDICTED: bifunctional aspartate aminotransferase and glutamate/aspartate-prephenate aminotransferase-like [Vitis vinifera] |
| 1904 | 921   | gi 731382079 | 69.49 | 3  | 3 | 1 |                      | 110376 | PREDICTED: neutral alpha-glucosidase C-like isoform X2 [Vitis vinifera]                                                      |
| 2109 | 19699 | gi 134093226 | 69.4  | 7  | 1 | 1 |                      | 22041  | ATP-dependent Clp protease proteolytic subunit (chloroplast) [Populus trichocarpa]                                           |
| 1370 | 858   | gi 359475902 | 69.33 | 7  | 4 | 3 | Carbamidomethylation | 61615  | PREDICTED: protein TIC 55 chloroplastic [Vitis vinifera]                                                                     |
| 1977 | 18384 | gi 224146080 | 69.33 | 14 | 2 | 2 |                      | 17003  | hypothetical protein POPTR_0019s05840g [Populus trichocarpa]                                                                 |
| 1912 | 2137  | gi 359477212 | 69.32 | 3  | 2 | 2 |                      | 91584  | PREDICTED: uncharacterized protein LOC100258488 isoform X1 [Vitis vinifera]                                                  |

|      |       |              |       |    |   |   |                      |        |                                                                                                  |
|------|-------|--------------|-------|----|---|---|----------------------|--------|--------------------------------------------------------------------------------------------------|
| 1819 | 18341 | gi 224066611 | 69.28 | 14 | 3 | 2 | Carbamidomethylation | 38531  | peroxidase precursor family protein [Populus trichocarpa]                                        |
| 1731 | 19841 | gi 224136125 | 69.22 | 13 | 3 | 2 |                      | 20526  | 60S ribosomal protein L17-1 [Populus trichocarpa]                                                |
| 2477 | 19200 | gi 566163352 | 69.21 | 4  | 2 | 2 |                      | 85586  | hypothetical protein POPTR_0003s18380g [Populus trichocarpa]                                     |
| 2936 | 29208 | gi 225465292 | 69.17 | 8  | 2 | 2 |                      | 33830  | PREDICTED: 2-C-methyl-D-erythritol 4-phosphate cytidyltransferase chloroplastic [Vitis vinifera] |
| 1932 | 18581 | gi 566256880 | 69.08 | 4  | 3 | 2 |                      | 62963  | hypothetical protein POPTR_0214s00200g [Populus trichocarpa]                                     |
| 1810 | 17950 | gi 224105287 | 69.04 | 8  | 2 | 2 |                      | 34749  | NADP dependent sorbitol 6-phosphate dehydrogenase family protein [Populus trichocarpa]           |
| 2317 | 29275 | gi 225450096 | 69.02 | 9  | 2 | 2 | Carbamidomethylation | 39782  | PREDICTED: actin-related protein 7 [Vitis vinifera]                                              |
| 1909 | 1486  | gi 225465204 | 69    | 3  | 3 | 2 | Carbamidomethylation | 122695 | PREDICTED: leucine--tRNA ligase cytoplasmic [Vitis vinifera]                                     |
| 1841 | 29013 | gi 224099725 | 68.9  | 5  | 2 | 1 |                      | 69331  | hypothetical protein POPTR_0008s14720g [Populus trichocarpa]                                     |
| 1937 | 2020  | gi 731374917 | 68.89 | 3  | 1 | 1 |                      | 45060  | PREDICTED: serine/threonine-protein kinase TNNI3K isoform X2 [Vitis vinifera]                    |
| 2228 | 1763  | gi 731440118 | 68.84 | 3  | 3 | 2 | Carbamidomethylation | 144044 | PREDICTED: kinesin-like protein KCA2 [Vitis vinifera]                                            |
| 1554 | 29204 | gi 225458782 | 68.8  | 7  | 2 | 1 |                      | 44534  | PREDICTED: 3-oxo-Delta(4 5)-steroid 5-beta-reductase-like [Vitis vinifera]                       |
| 1847 | 2197  | gi 526118093 | 68.8  | 8  | 1 | 1 | Carbamidomethylation | 22511  | type II peroxiredoxin E [Vitis vinifera]                                                         |
| 1623 | 18835 | gi 224089058 | 68.66 | 8  | 3 | 1 |                      | 49180  | aspartate transaminase family protein [Populus trichocarpa]                                      |
| 2538 | 881   | gi 225433707 | 68.64 | 2  | 2 | 2 |                      | 118913 | PREDICTED: probable importin-7 homolog [Vitis vinifera]                                          |

|      |       |              |       |    |   |   |                      |        |                                                                                                                      |
|------|-------|--------------|-------|----|---|---|----------------------|--------|----------------------------------------------------------------------------------------------------------------------|
| 2305 | 2091  | gi 225450155 | 68.63 | 9  | 2 | 2 |                      | 26703  | PREDICTED: thylakoid lumenal 19 kDa protein chloroplastic [Vitis vinifera]                                           |
| 1905 | 18310 | gi 224143674 | 68.61 | 11 | 3 | 3 |                      | 38385  | fructose-1 family protein [Populus trichocarpa]                                                                      |
| 2501 | 28948 | gi 566151358 | 68.6  | 3  | 3 | 3 |                      | 154446 | hypothetical protein POPTR_0001s27800g [Populus trichocarpa]                                                         |
| 1913 | 18538 | gi 224090627 | 68.6  | 2  | 2 | 1 | Carbamidomethylation | 157531 | WD-40 repeat family protein [Populus trichocarpa]                                                                    |
| 2126 | 2753  | gi 225429582 | 68.58 | 2  | 2 | 2 |                      | 98913  | PREDICTED: aminopeptidase M1 [Vitis vinifera]                                                                        |
| 2418 | 19026 | gi 566229479 | 68.45 | 2  | 3 | 3 | Carbamidomethylation | 283021 | hypothetical protein POPTR_0019s04090g [Populus trichocarpa]                                                         |
| 2101 | 29028 | gi 225452161 | 68.41 | 2  | 2 | 2 | Carbamidomethylation | 130963 | PREDICTED: protein TPLATE [Vitis vinifera]                                                                           |
| 1858 | 28957 | gi 224085670 | 68.22 | 21 | 4 | 4 |                      | 15447  | 60S ribosomal protein L14 [Populus trichocarpa]                                                                      |
| 2298 | 19932 | gi 731430611 | 68.18 | 8  | 3 | 1 |                      | 48137  | PREDICTED: protease Do-like 1 chloroplastic [Vitis vinifera]                                                         |
| 2270 | 1696  | gi 225428556 | 68    | 4  | 2 | 1 |                      | 48755  | PREDICTED: dolichyl-diphosphooligosaccharide--protein glycosyltransferase 48 kDa subunit isoform X2 [Vitis vinifera] |
| 1845 | 1562  | gi 224365629 | 67.99 | 6  | 2 | 2 |                      | 43947  | apocytochrome b (mitochondrion) [Vitis vinifera]                                                                     |
| 2267 | 18214 | gi 566175269 | 67.78 | 11 | 3 | 3 |                      | 42962  | hypothetical protein POPTR_0006s08830g [Populus trichocarpa]                                                         |
| 1778 | 19496 | gi 224078630 | 67.73 | 5  | 2 | 1 |                      | 62205  | ATP-binding-cassette transporter family protein [Populus trichocarpa]                                                |
| 2587 | 29200 | gi 225447109 | 67.65 | 10 | 2 | 2 | Carbamidomethylation | 24636  | PREDICTED: protein polybromo-1 [Vitis vinifera]                                                                      |
| 2231 | 29055 | gi 224069814 | 67.6  | 9  | 2 | 2 |                      | 28786  | Ni-binding urease accessory protein UreG [Populus trichocarpa]                                                       |
| 1067 | 2307  | gi 225441664 | 67.51 | 5  | 1 | 1 |                      | 36307  | PREDICTED: uncharacterized protein LOC100255512 [Vitis vinifera]                                                     |

|      |       |              |       |    |   |   |                                     |       |                                                                                                   |
|------|-------|--------------|-------|----|---|---|-------------------------------------|-------|---------------------------------------------------------------------------------------------------|
| 2265 | 1670  | gi 225436339 | 67.46 | 10 | 3 | 3 |                                     | 45109 | PREDICTED: arogenate dehydratase 3 chloroplastic [Vitis vinifera]                                 |
| 2303 | 894   | gi 225444609 | 67.45 | 9  | 2 | 1 |                                     | 26208 | PREDICTED: eukaryotic translation initiation factor 3 subunit K [Vitis vinifera]                  |
| 2447 | 19489 | gi 224095005 | 67.38 | 7  | 2 | 2 | Carbamidomethylation                | 33972 | xyloglucan endotransglycosylase hydrolase 2 family protein [Populus trichocarpa]                  |
| 1812 | 18418 | gi 566234529 | 67.37 | 22 | 2 | 1 | Carbamidomethylation                | 13103 | hypothetical protein POPTR_0019s07730g [Populus trichocarpa]                                      |
| 1968 | 28967 | gi 566209280 | 67.35 | 6  | 3 | 1 |                                     | 52718 | hypothetical protein POPTR_0016s08010g [Populus trichocarpa]                                      |
| 2304 | 22198 | gi 224096918 | 67.33 | 4  | 2 | 1 |                                     | 48882 | dolichyl-diphosphooligosaccharide-protein glycosyltransferase 48kDa subunit [Populus trichocarpa] |
| 2696 | 22799 | gi 224077880 | 67.29 | 4  | 2 | 1 |                                     | 82133 | beta-galactosidase family protein [Populus trichocarpa]                                           |
| 1603 | 19042 | gi 566210832 | 67.28 | 7  | 1 | 1 |                                     | 25245 | hypothetical protein POPTR_0017s02160g [Populus trichocarpa]                                      |
| 2320 | 29340 | gi 225436922 | 67.14 | 5  | 2 | 1 | Carbamidomethylation                | 59280 | PREDICTED: RAN GTPase-activating protein 1 [Vitis vinifera]                                       |
| 1753 | 1946  | gi 225440849 | 67.09 | 28 | 2 | 2 |                                     | 8952  | PREDICTED: probable small nuclear ribonucleoprotein G [Vitis vinifera]                            |
| 2153 | 28984 | gi 566256791 | 67.09 | 5  | 3 | 1 | Carbamidomethylation; Oxidation (M) | 67694 | hypothetical protein POPTR_0231s00220g [Populus trichocarpa]                                      |
| 1706 | 1358  | gi 731409226 | 66.89 | 4  | 2 | 1 |                                     | 43860 | PREDICTED: 3-hydroxyisobutyryl-CoA hydrolase-like protein 5 [Vitis vinifera]                      |
| 1465 | 18856 | gi 224099491 | 66.81 | 24 | 2 | 1 |                                     | 10451 | hypothetical protein POPTR_0008s12950g [Populus trichocarpa]                                      |
| 1036 | 1101  | gi 225434062 | 66.78 | 15 | 4 | 2 | Carbamidomethylation                | 28430 | PREDICTED: chitinase 5-like [Vitis vinifera]                                                      |

|      |       |              |       |    |   |   |                      |        |                                                                              |
|------|-------|--------------|-------|----|---|---|----------------------|--------|------------------------------------------------------------------------------|
| 1961 | 19481 | gi 224122412 | 66.76 | 7  | 1 | 1 |                      | 23172  | cytochrome b5 domain-containing family protein [Populus trichocarpa]         |
| 1620 | 19286 | gi 566208913 | 66.75 | 3  | 2 | 1 |                      | 37900  | hypothetical protein POPTR_0016s05800g [Populus trichocarpa]                 |
| 1592 | 1371  | gi 225469850 | 66.73 | 6  | 2 | 2 |                      | 39160  | PREDICTED: uncharacterized protein DDB_G0288133 [Vitis vinifera]             |
| 1751 | 18847 | gi 224141239 | 66.73 | 16 | 2 | 1 |                      | 15020  | hypothetical protein POPTR_0017s08140g [Populus trichocarpa]                 |
| 1764 | 18970 | gi 566167505 | 66.68 | 2  | 1 | 1 |                      | 112715 | adaptin family protein [Populus trichocarpa]                                 |
| 1920 | 18595 | gi 566190935 | 66.63 | 5  | 2 | 1 | Carbamidomethylation | 61141  | hypothetical protein POPTR_0010s15200g [Populus trichocarpa]                 |
| 1897 | 18854 | gi 224077654 | 66.55 | 3  | 3 | 1 |                      | 172709 | DNA (cytosine-5)-methyltransferase AthI family protein [Populus trichocarpa] |
| 2542 | 18575 | gi 566153712 | 66.53 | 5  | 2 | 2 |                      | 52249  | transport protein sec61 [Populus trichocarpa]                                |
| 2062 | 1272  | gi 225440480 | 66.49 | 10 | 3 | 1 |                      | 35139  | PREDICTED: aldo-keto reductase family 4 member C9-like [Vitis vinifera]      |
| 2204 | 29022 | gi 225454115 | 66.42 | 2  | 2 | 2 |                      | 131061 | PREDICTED: K(+) efflux antiporter 2 chloroplastic [Vitis vinifera]           |
| 2013 | 19680 | gi 566152777 | 66.28 | 15 | 1 | 1 | Carbamidomethylation | 12696  | hypothetical protein POPTR_0001s34690g [Populus trichocarpa]                 |
| 2297 | 28946 | gi 224077626 | 66.02 | 7  | 3 | 1 | Carbamidomethylation | 50063  | 3-oxoacyl-[acyl-carrier-protein] synthase I [Populus trichocarpa]            |
| 2585 | 20382 | gi 225439033 | 65.98 | 2  | 2 | 1 | Carbamidomethylation | 139714 | PREDICTED: uncharacterized protein LOC100248418 [Vitis vinifera]             |
| 1807 | 18287 | gi 224120380 | 65.95 | 6  | 3 | 3 |                      | 61938  | hypothetical protein POPTR_0012s03790g [Populus trichocarpa]                 |
| 2509 | 18295 | gi 224107711 | 65.84 | 8  | 2 | 2 |                      | 35785  | b-keto acyl reductase family protein [Populus trichocarpa]                   |

|      |       |              |       |    |   |   |                      |        |                                                                               |
|------|-------|--------------|-------|----|---|---|----------------------|--------|-------------------------------------------------------------------------------|
| 1829 | 2131  | gi 731388570 | 65.82 | 2  | 2 | 1 |                      | 125817 | PREDICTED: DEAD-box ATP-dependent RNA helicase 46 isoform X2 [Vitis vinifera] |
| 2131 | 29187 | gi 225464130 | 65.81 | 11 | 2 | 2 | Carbamidomethylation | 30020  | PREDICTED: nifU-like protein 4 mitochondrial [Vitis vinifera]                 |
| 2125 | 29101 | gi 731379074 | 65.66 | 4  | 2 | 1 |                      | 72114  | PREDICTED: probable methyltransferase PMT18 isoform X2 [Vitis vinifera]       |
| 1068 | 1967  | gi 731424493 | 65.55 | 7  | 2 | 2 |                      | 21410  | PREDICTED: protein MATERNALLY EXPRESSED GENE 5 isoform X3 [Vitis vinifera]    |
| 2063 | 18114 | gi 566209593 | 65.55 | 10 | 3 | 1 |                      | 36623  | hypothetical protein POPTR_0016s10390g [Populus trichocarpa]                  |
| 1635 | 17842 | gi 224057968 | 65.48 | 13 | 2 | 1 | Carbamidomethylation | 24349  | photosystem I chain III family protein [Populus trichocarpa]                  |
| 1760 | 29039 | gi 731391349 | 65.45 | 3  | 2 | 2 |                      | 73345  | PREDICTED: UDP-glycosyltransferase 74E2 [Vitis vinifera]                      |
| 2583 | 18891 | gi 566152365 | 65.37 | 7  | 3 | 2 |                      | 43020  | Vacuolar ATP synthase subunit C family protein [Populus trichocarpa]          |
| 2194 | 1805  | gi 731402392 | 65.35 | 3  | 1 | 1 |                      | 65873  | PREDICTED: malonate--CoA ligase isoform X3 [Vitis vinifera]                   |
| 1842 | 29021 | gi 224103461 | 65.32 | 3  | 2 | 1 |                      | 84015  | hypothetical protein POPTR_0009s11520g [Populus trichocarpa]                  |
| 1921 | 2019  | gi 225431914 | 65.18 | 4  | 2 | 1 |                      | 60422  | PREDICTED: dihydrolipoyl dehydrogenase 2 chloroplastic [Vitis vinifera]       |
| 2461 | 18123 | gi 566212877 | 65.01 | 3  | 1 | 1 | Carbamidomethylation | 57107  | hypothetical protein POPTR_0017s12170g [Populus trichocarpa]                  |
| 1758 | 17798 | gi 224146178 | 64.92 | 4  | 2 | 1 | Carbamidomethylation | 49470  | hypothetical protein POPTR_0019s08290g [Populus trichocarpa]                  |
| 1457 | 19656 | gi 566169467 | 64.9  | 9  | 1 | 1 |                      | 13987  | hypothetical protein POPTR_0005s04590g [Populus trichocarpa]                  |

|      |       |              |       |    |   |   |                      |        |                                                                                      |
|------|-------|--------------|-------|----|---|---|----------------------|--------|--------------------------------------------------------------------------------------|
| 1871 | 29301 | gi 224080283 | 64.78 | 3  | 2 | 1 | Carbamidomethylation | 84128  | hypothetical protein POPTR_0004s15790g [Populus trichocarpa]                         |
| 1917 | 28914 | gi 566148153 | 64.74 | 9  | 4 | 1 |                      | 54002  | Monodehydroascorbate reductase family protein [Populus trichocarpa]                  |
| 2106 | 1951  | gi 731402186 | 64.73 | 7  | 1 | 1 |                      | 24523  | PREDICTED: vacuolar protein sorting-associated protein 32 homolog 2 [Vitis vinifera] |
| 2079 | 28966 | gi 566177670 | 64.69 | 6  | 3 | 1 |                      | 52363  | RNA recognition motif-containing family protein [Populus trichocarpa]                |
| 1147 | 1956  | gi 225442434 | 64.69 | 18 | 2 | 1 |                      | 14228  | PREDICTED: profilin-1 [Vitis vinifera]                                               |
| 1088 | 1642  | gi 225462170 | 64.61 | 12 | 2 | 2 |                      | 15615  | PREDICTED: 60S ribosomal protein L27 [Vitis vinifera]                                |
| 1413 | 29053 | gi 225448156 | 64.61 | 4  | 2 | 1 |                      | 42820  | PREDICTED: ATP phosphoribosyltransferase 2 chloroplastic [Vitis vinifera]            |
| 1900 | 1894  | gi 359480888 | 64.6  | 10 | 2 | 1 |                      | 39762  | PREDICTED: RNA-binding protein Musashi homolog 2 [Vitis vinifera]                    |
| 1538 | 29005 | gi 224084784 | 64.52 | 3  | 2 | 1 |                      | 61214  | glycine hydroxymethyltransferase family protein [Populus trichocarpa]                |
| 2127 | 29111 | gi 731435721 | 64.51 | 3  | 2 | 2 |                      | 70515  | PREDICTED: uncharacterized protein LOC100257572 isoform X2 [Vitis vinifera]          |
| 1249 | 18948 | gi 566197644 | 64.46 | 12 | 2 | 1 |                      | 26318  | hypothetical protein POPTR_0012s09540g [Populus trichocarpa]                         |
| 1942 | 19687 | gi 224089062 | 64.43 | 6  | 1 | 1 |                      | 27753  | hypothetical protein POPTR_0006s25870g [Populus trichocarpa]                         |
| 2356 | 2259  | gi 225431922 | 64.39 | 19 | 2 | 2 | Carbamidomethylation | 13225  | PREDICTED: DNA-directed RNA polymerases II IV and V subunit 9A [Vitis vinifera]      |
| 1735 | 18662 | gi 566201753 | 64.27 | 9  | 2 | 2 | Carbamidomethylation | 34979  | hypothetical protein POPTR_0014s01090g [Populus trichocarpa]                         |
| 1862 | 18423 | gi 224056200 | 64.12 | 6  | 3 | 2 | Carbamidomethylation | 48114  | 5-methylthioribose kinase family protein [Populus trichocarpa]                       |
| 2052 | 29003 | gi 225436363 | 64.1  | 2  | 2 | 2 |                      | 113112 | PREDICTED: AP-2 complex subunit alpha-1 [Vitis vinifera]                             |

|      |       |              |       |    |   |   |                      |       |                                                                                                     |
|------|-------|--------------|-------|----|---|---|----------------------|-------|-----------------------------------------------------------------------------------------------------|
| 714  | 1227  | gi 225443962 | 64.1  | 3  | 3 | 3 |                      | 81691 | PREDICTED: CSC1-like protein ERD4 [Vitis vinifera]                                                  |
| 1839 | 28965 | gi 359487628 | 64.02 | 24 | 3 | 1 |                      | 14010 | PREDICTED: 60S ribosomal protein L22-2 [Vitis vinifera]                                             |
| 852  | 18297 | gi 566192144 | 63.76 | 6  | 2 | 2 |                      | 36328 | hypothetical protein POPTR_0010s22170g [Populus trichocarpa]                                        |
| 2368 | 29822 | gi 225449062 | 63.75 | 10 | 2 | 1 |                      | 12458 | PREDICTED: V-type proton ATPase subunit G1 [Vitis vinifera]                                         |
| 2069 | 19309 | gi 224097184 | 63.58 | 4  | 2 | 1 |                      | 73308 | Phosphoenolpyruvate carboxykinase family protein [Populus trichocarpa]                              |
| 1906 | 17849 | gi 566211354 | 63.58 | 11 | 3 | 1 |                      | 34355 | phosphatase 2C family protein [Populus trichocarpa]                                                 |
| 2310 | 18228 | gi 224065629 | 63.52 | 15 | 2 | 2 | Carbamidomethylation | 16418 | CP12 domain-containing family protein [Populus trichocarpa]                                         |
| 1830 | 2040  | gi 731428304 | 63.47 | 2  | 1 | 1 |                      | 81014 | PREDICTED: apoptotic chromatin condensation inducer in the nucleus-like isoform X2 [Vitis vinifera] |
| 1954 | 29099 | gi 225432812 | 63.44 | 4  | 2 | 2 |                      | 52461 | PREDICTED: ATP sulfurylase 1 chloroplastic [Vitis vinifera]                                         |
| 2714 | 18397 | gi 566177989 | 63.43 | 5  | 2 | 1 |                      | 50804 | hypothetical protein POPTR_0006s24710g [Populus trichocarpa]                                        |
| 1492 | 2852  | gi 731410160 | 63.34 | 4  | 2 | 2 | Carbamidomethylation | 44936 | PREDICTED: transcription initiation factor TFIID subunit 15b isoform X2 [Vitis vinifera]            |
| 2070 | 2338  | gi 359496232 | 63.32 | 8  | 1 | 1 |                      | 21717 | PREDICTED: probable NAD(P)H dehydrogenase (quinone) FQR1-like 1 [Vitis vinifera]                    |
| 2223 | 2415  | gi 225450075 | 63.24 | 6  | 2 | 1 |                      | 41952 | PREDICTED: peptidyl-prolyl cis-trans isomerase FKBP42 [Vitis vinifera]                              |
| 2349 | 2595  | gi 359473679 | 63.12 | 6  | 2 | 2 | Carbamidomethylation | 35252 | PREDICTED: uncharacterized protein LOC100852583 [Vitis vinifera]                                    |
| 2508 | 1566  | gi 731438444 | 63.11 | 5  | 2 | 2 | Carbamidomethylation | 51427 | PREDICTED: ruvB-like 2 [Vitis vinifera]                                                             |
| 2547 | 29147 | gi 731421096 | 63.07 | 6  | 2 | 2 | Carbamidomethylation | 40246 | PREDICTED: ATPase ASNA1 homolog isoform X2 [Vitis vinifera]                                         |



|      |       |              |       |    |   |   |                      |        |                                                                                                       |
|------|-------|--------------|-------|----|---|---|----------------------|--------|-------------------------------------------------------------------------------------------------------|
| 1969 | 3565  | gi 359488798 | 63.01 | 7  | 3 | 3 |                      | 50050  | PREDICTED: uridine kinase-like protein 5 isoform X1 [Vitis vinifera]                                  |
| 2549 | 18336 | gi 566207035 | 62.96 | 4  | 2 | 1 |                      | 62799  | hypothetical protein POPTR_0015s11280g [Populus trichocarpa]                                          |
| 2220 | 1726  | gi 225440169 | 62.96 | 5  | 2 | 2 |                      | 57401  | PREDICTED: cytochrome P450 98A2 [Vitis vinifera]                                                      |
| 2099 | 28970 | gi 566200435 | 62.96 | 11 | 3 | 3 |                      | 40267  | hypothetical protein POPTR_0013s10150g [Populus trichocarpa]                                          |
| 2299 | 1892  | gi 359478198 | 62.92 | 6  | 2 | 1 |                      | 45369  | PREDICTED: acyl-[acyl-carrier-protein] desaturase chloroplastic [Vitis vinifera]                      |
| 2377 | 19993 | gi 566196533 | 62.91 | 8  | 2 | 2 | Carbamidomethylation | 14778  | cytochrome b5 isoform Cb5-C family protein [Populus trichocarpa]                                      |
| 2406 | 18283 | gi 566175427 | 62.9  | 2  | 1 | 1 |                      | 83585  | acetyl co-enzyme A carboxylase carboxyltransferase alpha subunit family protein [Populus trichocarpa] |
| 1939 | 29074 | gi 225461628 | 62.83 | 4  | 2 | 1 |                      | 45420  | PREDICTED: UBP1-associated protein 2C [Vitis vinifera]                                                |
| 2271 | 2760  | gi 225437515 | 62.8  | 6  | 1 | 1 | Carbamidomethylation | 38873  | PREDICTED: dnaJ protein ERDJ3B [Vitis vinifera]                                                       |
| 1986 | 29326 | gi 224073746 | 62.69 | 11 | 2 | 2 | Carbamidomethylation | 16415  | zinc finger family protein [Populus trichocarpa]                                                      |
| 2247 | 1474  | gi 225453042 | 62.68 | 2  | 2 | 2 |                      | 113229 | PREDICTED: cell division cycle 5-like protein [Vitis vinifera]                                        |
| 2269 | 29025 | gi 566161931 | 62.66 | 6  | 2 | 2 | Carbamidomethylation | 67485  | dehydration-responsive family protein [Populus trichocarpa]                                           |
| 2344 | 28964 | gi 224131934 | 62.55 | 7  | 3 | 3 |                      | 57186  | hypothetical protein POPTR_0014s16990g [Populus trichocarpa]                                          |
| 1959 | 1881  | gi 731426493 | 62.34 | 5  | 1 | 1 | Carbamidomethylation | 34081  | PREDICTED: inositol polyphosphate multikinase beta [Vitis vinifera]                                   |
| 2171 | 19746 | gi 224085103 | 62.31 | 22 | 1 | 1 | Carbamidomethylation | 7996   | ubiquinol-cytochrome C reductase complex 7.8 kDa family protein [Populus trichocarpa]                 |
| 1552 | 28971 | gi 566173499 | 62.3  | 6  | 4 | 4 |                      | 96991  | hypothetical protein POPTR_0005s27240g [Populus trichocarpa]                                          |

|      |       |              |       |    |   |   |                      |        |                                                                                             |
|------|-------|--------------|-------|----|---|---|----------------------|--------|---------------------------------------------------------------------------------------------|
| 1745 | 18862 | gi 224066707 | 62.28 | 10 | 3 | 3 |                      | 36793  | fructose-1 family protein [Populus trichocarpa]                                             |
| 2260 | 18447 | gi 359474555 | 62.27 | 4  | 1 | 1 |                      | 43514  | PREDICTED: probable ADP-ribosylation factor GTPase-activating protein AGD8 [Vitis vinifera] |
| 2307 | 29092 | gi 566200745 | 62.23 | 4  | 2 | 1 |                      | 53188  | hypothetical protein POPTR_0013s11690g [Populus trichocarpa]                                |
| 1972 | 1152  | gi 225453336 | 62.14 | 3  | 3 | 2 |                      | 90759  | PREDICTED: glutamine--tRNA ligase [Vitis vinifera]                                          |
| 2276 | 29117 | gi 566259557 | 62.07 | 5  | 2 | 2 | Carbamidomethylation | 54920  | hypothetical protein POPTR_0028s00200g partial [Populus trichocarpa]                        |
| 2124 | 18739 | gi 566186085 | 62.06 | 16 | 2 | 1 |                      | 14506  | hypothetical protein POPTR_0009s03370g partial [Populus trichocarpa]                        |
| 1979 | 18181 | gi 566177775 | 62.04 | 6  | 2 | 1 |                      | 35282  | hypothetical protein POPTR_0006s23520g [Populus trichocarpa]                                |
| 2428 | 2087  | gi 731440022 | 62.01 | 4  | 2 | 1 |                      | 73346  | PREDICTED: phosphoenolpyruvate carboxykinase [ATP]-like [Vitis vinifera]                    |
| 2550 | 29230 | gi 224130030 | 61.92 | 17 | 2 | 2 |                      | 17369  | peptidyl-prolyl cis-trans isomerase cyclophilin-type family protein [Populus trichocarpa]   |
| 2555 | 2398  | gi 225435925 | 61.81 | 3  | 1 | 1 | Carbamidomethylation | 50361  | PREDICTED: cysteine desulfurase 2 chloroplastic [Vitis vinifera]                            |
| 2489 | 6864  | gi 359475352 | 61.75 | 3  | 1 | 1 |                      | 49145  | PREDICTED: uncharacterized protein At4g06744 [Vitis vinifera]                               |
| 1851 | 1667  | gi 225432306 | 61.7  | 22 | 2 | 2 | Carbamidomethylation | 9210   | PREDICTED: 40S ribosomal protein S21 [Vitis vinifera]                                       |
| 1967 | 28962 | gi 225444798 | 61.55 | 5  | 3 | 1 |                      | 74572  | PREDICTED: phospholipid:diacylglycerol acyltransferase 1 [Vitis vinifera]                   |
| 1705 | 2906  | gi 731398176 | 61.5  | 2  | 3 | 2 | Carbamidomethylation | 177869 | PREDICTED: intron-binding protein aquarius-like [Vitis vinifera]                            |
| 1319 | 2451  | gi 225439775 | 61.49 | 8  | 2 | 1 |                      | 27055  | PREDICTED: glutathione S-transferase L3-like [Vitis vinifera]                               |

|      |       |              |       |    |   |   |                      |        |                                                                                                       |
|------|-------|--------------|-------|----|---|---|----------------------|--------|-------------------------------------------------------------------------------------------------------|
| 2347 | 28979 | gi 225464234 | 61.45 | 16 | 3 | 3 | Carbamidomethylation | 24603  | PREDICTED: vesicle-associated membrane protein 722 [Vitis vinifera]                                   |
| 2958 | 7371  | gi 225441539 | 61.44 | 20 | 1 | 1 |                      | 18749  | PREDICTED: 60S ribosomal protein L21-1 [Vitis vinifera]                                               |
| 2766 | 29066 | gi 731389932 | 61.42 | 5  | 2 | 2 |                      | 60485  | PREDICTED: glutamyl-tRNA(Gln) amidotransferase subunit B chloroplastic/mitochondrial [Vitis vinifera] |
| 1631 | 2936  | gi 731422016 | 61.38 | 2  | 2 | 2 |                      | 109785 | PREDICTED: exportin-2 [Vitis vinifera]                                                                |
| 2937 | 19098 | gi 224109936 | 61.35 | 32 | 2 | 2 | Carbamidomethylation | 13215  | hypothetical protein POPTR_0010s26160g [Populus trichocarpa]                                          |
| 2415 | 1738  | gi 526117810 | 61.3  | 5  | 1 | 1 |                      | 38980  | farnesyl diphosphate synthase [Vitis vinifera]                                                        |
| 2869 | 29098 | gi 225431247 | 61.24 | 18 | 2 | 2 |                      | 12750  | PREDICTED: thioredoxin H-type 2 [Vitis vinifera]                                                      |
| 2179 | 1408  | gi 731408196 | 61.21 | 2  | 1 | 1 |                      | 87158  | PREDICTED: subtilisin-like protease isoform X4 [Vitis vinifera]                                       |
| 2308 | 1899  | gi 225444143 | 61.14 | 6  | 2 | 2 |                      | 56177  | PREDICTED: patellin-4 [Vitis vinifera]                                                                |
| 2203 | 3257  | gi 225446080 | 61.13 | 3  | 2 | 1 |                      | 60376  | PREDICTED: 4-coumarate--CoA ligase 2 [Vitis vinifera]                                                 |
| 2695 | 29048 | gi 224139722 | 61.06 | 5  | 2 | 2 |                      | 67639  | hypothetical protein POPTR_0016s03570g [Populus trichocarpa]                                          |
| 2301 | 20922 | gi 566205979 | 61.03 | 4  | 2 | 1 |                      | 46529  | hypothetical protein POPTR_0015s05410g [Populus trichocarpa]                                          |
| 1539 | 18942 | gi 566197584 | 60.93 | 5  | 2 | 2 |                      | 42529  | hypothetical protein POPTR_0012s09200g [Populus trichocarpa]                                          |
| 1997 | 19198 | gi 566191500 | 60.9  | 7  | 3 | 1 | Carbamidomethylation | 38352  | allyl alcohol dehydrogenase family protein [Populus trichocarpa]                                      |
| 2348 | 21187 | gi 225452785 | 60.9  | 11 | 3 | 3 |                      | 29509  | PREDICTED: NAP1-related protein 2 [Vitis vinifera]                                                    |
| 1579 | 1991  | gi 225431173 | 60.85 | 13 | 1 | 1 |                      | 12904  | PREDICTED: peptidyl-prolyl cis-trans isomerase Pin1 [Vitis vinifera]                                  |

|      |       |              |       |    |   |   |                      |        |                                                                                          |
|------|-------|--------------|-------|----|---|---|----------------------|--------|------------------------------------------------------------------------------------------|
| 2309 | 2125  | gi 731415654 | 60.84 | 3  | 2 | 2 |                      | 73684  | PREDICTED: acyl-CoA-binding domain-containing protein 4-like isoform X2 [Vitis vinifera] |
| 1826 | 2038  | gi 526117828 | 60.84 | 12 | 2 | 1 |                      | 16599  | serine/threonine kinase-like [Vitis vinifera]                                            |
| 1877 | 2329  | gi 225435002 | 60.79 | 6  | 1 | 1 | Carbamidomethylation | 27396  | PREDICTED: osmotin-like protein [Vitis vinifera]                                         |
| 2086 | 4639  | gi 225442172 | 60.73 | 4  | 2 | 1 |                      | 75488  | PREDICTED: phospholipid:diacylglycerol acyltransferase 1 [Vitis vinifera]                |
| 1657 | 19104 | gi 224078057 | 60.56 | 5  | 1 | 1 |                      | 28150  | phosphorylase family protein [Populus trichocarpa]                                       |
| 2940 | 20107 | gi 224138170 | 60.45 | 29 | 2 | 2 |                      | 7523   | hypothetical protein POPTR_0016s06300g [Populus trichocarpa]                             |
| 2480 | 2389  | gi 731369373 | 60.45 | 5  | 2 | 1 | Carbamidomethylation | 51603  | PREDICTED: glucan endo-1 3-beta-glucosidase 3 isoform X2 [Vitis vinifera]                |
| 2019 | 20158 | gi 566158427 | 60.44 | 7  | 2 | 2 |                      | 17387  | calmodulin 2 family protein [Populus trichocarpa]                                        |
| 2959 | 2330  | gi 225438277 | 60.44 | 3  | 1 | 1 | Carbamidomethylation | 45078  | PREDICTED: alcohol dehydrogenase 1 [Vitis vinifera]                                      |
| 2083 | 17693 | gi 224091819 | 60.41 | 3  | 2 | 1 |                      | 88349  | MIF4G domain-containing family protein [Populus trichocarpa]                             |
| 2162 | 19817 | gi 566215175 | 60.4  | 34 | 2 | 2 |                      | 7135   | hypothetical protein POPTR_0018s10540g [Populus trichocarpa]                             |
| 2543 | 19629 | gi 566157027 | 60.38 | 9  | 2 | 2 |                      | 34854  | hypothetical protein POPTR_0002s09060g [Populus trichocarpa]                             |
| 1454 | 2032  | gi 359474652 | 60.29 | 7  | 2 | 2 | Carbamidomethylation | 50670  | PREDICTED: scopoletin glucosyltransferase-like [Vitis vinifera]                          |
| 1383 | 1373  | gi 225465210 | 60.26 | 17 | 2 | 2 |                      | 11974  | PREDICTED: cytochrome c [Vitis vinifera]                                                 |
| 2765 | 29050 | gi 566181279 | 60.25 | 2  | 2 | 1 |                      | 140709 | hypothetical protein POPTR_0007s14320g [Populus trichocarpa]                             |

|      |       |              |       |    |   |   |                      |        |                                                                                                                 |
|------|-------|--------------|-------|----|---|---|----------------------|--------|-----------------------------------------------------------------------------------------------------------------|
| 1736 | 18086 | gi 224071469 | 60.21 | 4  | 1 | 1 |                      | 50726  | eukaryotic translation initiation factor 2 subunit 3 family protein [Populus trichocarpa]                       |
| 1565 | 18535 | gi 224064627 | 60.19 | 3  | 1 | 1 |                      | 82942  | pre-mRNA splicing factor ATP-dependent RNA helicase family protein [Populus trichocarpa]                        |
| 2065 | 18227 | gi 566196001 | 60.08 | 13 | 2 | 2 | Carbamidomethylation | 17516  | dimethylmenaquinone methyltransferase family protein [Populus trichocarpa]                                      |
| 2540 | 29049 | gi 224141563 | 60.05 | 7  | 2 | 1 |                      | 23553  | peroxiredoxin Q family protein [Populus trichocarpa]                                                            |
| 2246 | 5138  | gi 731404421 | 60    | 9  | 3 | 2 | Carbamidomethylation | 51194  | PREDICTED: monothiol glutaredoxin-S17 isoform X2 [Vitis vinifera]                                               |
| 1873 | 2434  | gi 225446899 | 59.94 | 3  | 2 | 1 |                      | 70904  | PREDICTED: DEAD-box ATP-dependent RNA helicase 53-like [Vitis vinifera]                                         |
| 2222 | 1703  | gi 731376062 | 59.77 | 3  | 2 | 1 |                      | 83343  | PREDICTED: urease isoform X2 [Vitis vinifera]                                                                   |
| 2137 | 29372 | gi 566170569 | 59.73 | 9  | 2 | 1 |                      | 29811  | hypothetical protein POPTR_0005s10420g [Populus trichocarpa]                                                    |
| 2893 | 29710 | gi 359495737 | 59.73 | 5  | 1 | 1 |                      | 32269  | PREDICTED: ATP-dependent Clp protease proteolytic subunit-related protein 4 chloroplastic-like [Vitis vinifera] |
| 2311 | 2271  | gi 731410110 | 59.7  | 2  | 2 | 1 | Carbamidomethylation | 108803 | PREDICTED: vacuolar protein-sorting-associated protein 11 homolog isoform X1 [Vitis vinifera]                   |
| 2484 | 19418 | gi 731390081 | 59.69 | 6  | 2 | 2 | Carbamidomethylation | 50947  | PREDICTED: probable pectate lyase 8 [Vitis vinifera]                                                            |
| 2129 | 18859 | gi 224107333 | 59.69 | 26 | 2 | 2 |                      | 9716   | hypothetical protein POPTR_0010s02580g [Populus trichocarpa]                                                    |
| 1694 | 928   | gi 225445670 | 59.66 | 9  | 3 | 1 |                      | 24997  | PREDICTED: proteasome subunit beta type-6 [Vitis vinifera]                                                      |
| 1799 | 19396 | gi 731382729 | 59.66 | 9  | 2 | 1 | Carbamidomethylation | 39538  | PREDICTED: isocitrate dehydrogenase [NAD] regulatory subunit 1 mitochondrial isoform X2 [Vitis vinifera]        |

|      |       |              |       |    |   |   |                      |        |                                                                                      |
|------|-------|--------------|-------|----|---|---|----------------------|--------|--------------------------------------------------------------------------------------|
| 769  | 1200  | gi 225452053 | 59.63 | 10 | 3 | 3 |                      | 21963  | PREDICTED: 40S ribosomal protein S7 [Vitis vinifera]                                 |
| 1827 | 18555 | gi 566167707 | 59.63 | 8  | 2 | 2 |                      | 29259  | alcohol dehydroge family protein [Populus trichocarpa]                               |
| 2960 | 29805 | gi 566161524 | 59.61 | 16 | 1 | 1 |                      | 12520  | hypothetical protein POPTR_0003s081902g partial [Populus trichocarpa]                |
| 1654 | 18775 | gi 566181200 | 59.58 | 4  | 2 | 1 | Carbamidomethylation | 55243  | serine carboxypeptidase S28 family protein [Populus trichocarpa]                     |
| 1656 | 29353 | gi 225431940 | 59.5  | 16 | 2 | 2 | Carbamidomethylation | 18056  | PREDICTED: universal stress protein A-like protein [Vitis vinifera]                  |
| 1924 | 2559  | gi 225433676 | 59.47 | 7  | 2 | 1 |                      | 37475  | PREDICTED: probable aldo-keto reductase 2 [Vitis vinifera]                           |
| 2133 | 1668  | gi 225448536 | 59.45 | 7  | 2 | 2 |                      | 38803  | PREDICTED: eukaryotic translation initiation factor 2 subunit alpha [Vitis vinifera] |
| 2068 | 29026 | gi 731395931 | 59.33 | 2  | 2 | 2 |                      | 114613 | PREDICTED: protein translocase subunit SecA chloroplastic [Vitis vinifera]           |
| 1265 | 1489  | gi 731400676 | 59.12 | 12 | 2 | 2 |                      | 18669  | PREDICTED: 60S ribosomal protein L24 [Vitis vinifera]                                |
| 2820 | 2245  | gi 731381456 | 59.08 | 7  | 2 | 2 |                      | 34629  | PREDICTED: translocase of chloroplast 34 chloroplastic isoform X2 [Vitis vinifera]   |
| 1247 | 18903 | gi 566146533 | 59.08 | 27 | 3 | 3 |                      | 10147  | acyl-CoA-binding family protein [Populus trichocarpa]                                |
| 2189 | 20645 | gi 224146640 | 59.04 | 2  | 2 | 2 |                      | 111716 | chloroplast inner envelope family protein [Populus trichocarpa]                      |
| 1107 | 2502  | gi 225424908 | 58.9  | 8  | 2 | 1 |                      | 29426  | PREDICTED: mitochondrial outer membrane protein porin of 36 kDa [Vitis vinifera]     |
| 1556 | 2442  | gi 225429295 | 58.68 | 8  | 2 | 2 |                      | 25371  | PREDICTED: uncharacterized protein LOC100254416 [Vitis vinifera]                     |
| 2458 | 1931  | gi 225453329 | 58.65 | 18 | 2 | 2 |                      | 12870  | PREDICTED: tubulin-folding cofactor A [Vitis vinifera]                               |
| 2005 | 18545 | gi 566170295 | 58.54 | 3  | 2 | 1 | Oxidation (M)        | 119716 | Valyl-tRNA synthetase family protein [Populus trichocarpa]                           |

|      |       |              |       |    |   |   |                      |        |                                                                                       |
|------|-------|--------------|-------|----|---|---|----------------------|--------|---------------------------------------------------------------------------------------|
| 2172 | 19514 | gi 566254378 | 58.31 | 15 | 1 | 1 | Carbamidomethylation | 9714   | hypothetical protein POPTR_0997s00210g partial [Populus trichocarpa]                  |
| 2715 | 29152 | gi 566212923 | 58.28 | 6  | 2 | 2 | Carbamidomethylation | 56707  | hypothetical protein POPTR_0017s12380g [Populus trichocarpa]                          |
| 1990 | 19431 | gi 566151403 | 58.27 | 20 | 1 | 1 |                      | 8809   | hypothetical protein POPTR_0001s28090g [Populus trichocarpa]                          |
| 2274 | 18997 | gi 566236086 | 58.26 | 4  | 2 | 1 | Carbamidomethylation | 48154  | hypothetical protein POPTR_0019s08450g [Populus trichocarpa]                          |
| 1386 | 20214 | gi 566156678 | 58.11 | 6  | 2 | 2 |                      | 23173  | hypothetical protein POPTR_0002s07090g [Populus trichocarpa]                          |
| 1708 | 2798  | gi 225455286 | 58.04 | 8  | 2 | 2 |                      | 34977  | PREDICTED: vacuolar protein sorting-associated protein 26A [Vitis vinifera]           |
| 1828 | 18641 | gi 566169633 | 58.03 | 8  | 2 | 2 |                      | 30715  | hypothetical protein POPTR_0005s05400g [Populus trichocarpa]                          |
| 1741 | 29811 | gi 224144252 | 58.01 | 14 | 1 | 1 |                      | 14788  | hypothetical protein POPTR_0018s13330g [Populus trichocarpa]                          |
| 2590 | 29257 | gi 225433191 | 57.99 | 8  | 2 | 2 |                      | 31525  | PREDICTED: probable plastid-lipid-associated protein 6 chloroplastic [Vitis vinifera] |
| 1614 | 1104  | gi 731435142 | 57.97 | 3  | 2 | 1 |                      | 84036  | PREDICTED: protein ROOT HAIR DEFECTIVE 3 homolog 2 isoform X2 [Vitis vinifera]        |
| 2363 | 2312  | gi 225457389 | 57.81 | 5  | 1 | 1 |                      | 27867  | PREDICTED: chlorophyll a-b binding protein 4 chloroplastic [Vitis vinifera]           |
| 1558 | 19793 | gi 566181894 | 57.71 | 3  | 2 | 1 |                      | 58001  | hypothetical protein POPTR_0008s02250g [Populus trichocarpa]                          |
| 2680 | 29068 | gi 731430671 | 57.63 | 2  | 2 | 2 | Carbamidomethylation | 122832 | PREDICTED: exocyst complex component SEC5A [Vitis vinifera]                           |
| 2255 | 3802  | gi 225463809 | 57.62 | 6  | 2 | 1 | Carbamidomethylation | 44723  | PREDICTED: alpha-galactosidase [Vitis vinifera]                                       |

|      |       |              |       |    |   |   |                                     |       |                                                                                          |
|------|-------|--------------|-------|----|---|---|-------------------------------------|-------|------------------------------------------------------------------------------------------|
| 2831 | 19296 | gi 566205313 | 57.57 | 6  | 2 | 2 |                                     | 28442 | glucosamine/galactosamine-6-phosphate isomerase family protein [Populus trichocarpa]     |
| 1876 | 2344  | gi 225443154 | 57.56 | 9  | 1 | 1 | Carbamidomethylation; Oxidation (M) | 18245 | PREDICTED: lamin-like protein [Vitis vinifera]                                           |
| 2221 | 19275 | gi 566185320 | 57.55 | 3  | 2 | 2 |                                     | 87131 | hypothetical protein POPTR_0008s22260g [Populus trichocarpa]                             |
| 2941 | 29258 | gi 731430003 | 57.52 | 18 | 2 | 2 |                                     | 21619 | PREDICTED: rac-like GTP-binding protein 5 [Vitis vinifera]                               |
| 1302 | 19311 | gi 566172679 | 57.52 | 2  | 1 | 1 |                                     | 63027 | hypothetical protein POPTR_0005s22250g [Populus trichocarpa]                             |
| 2512 | 29093 | gi 566177795 | 57.47 | 7  | 2 | 2 | Carbamidomethylation                | 39471 | eukaryotic translation initiation factor 2B family protein [Populus trichocarpa]         |
| 2116 | 28975 | gi 225445059 | 57.42 | 8  | 3 | 3 |                                     | 53815 | PREDICTED: glucan endo-1 3-beta-glucosidase 13 [Vitis vinifera]                          |
| 2151 | 1379  | gi 731402065 | 57.4  | 4  | 3 | 1 |                                     | 60930 | PREDICTED: chaperonin CPN60-like 2 mitochondrial [Vitis vinifera]                        |
| 1811 | 18744 | gi 224111090 | 57.38 | 5  | 2 | 1 | Oxidation (M)                       | 64765 | pyruvate phosphotransferase family protein [Populus trichocarpa]                         |
| 2132 | 18351 | gi 566216001 | 57.36 | 5  | 2 | 2 | Carbamidomethylation                | 74542 | hypothetical protein POPTR_0019s00300g [Populus trichocarpa]                             |
| 1868 | 950   | gi 225440362 | 57.21 | 20 | 2 | 1 | Oxidation (M)                       | 10797 | PREDICTED: mitochondrial import inner membrane translocase subunit Tim9 [Vitis vinifera] |
| 1825 | 18938 | gi 566170130 | 57.2  | 4  | 2 | 1 |                                     | 51590 | hypothetical protein POPTR_0005s08100g [Populus trichocarpa]                             |
| 1634 | 20008 | gi 224118114 | 57.19 | 3  | 3 | 2 |                                     | 96198 | hypothetical protein POPTR_0012s01060g [Populus trichocarpa]                             |
| 1869 | 2120  | gi 731389062 | 57.13 | 8  | 2 | 2 |                                     | 25568 | PREDICTED: endo-1 3;1 4-beta-D-glucanase-like [Vitis vinifera]                           |
| 2121 | 18453 | gi 224122636 | 57.12 | 4  | 2 | 2 |                                     | 46434 | putative calmodulin-binding family protein [Populus trichocarpa]                         |



|      |       |              |       |    |   |   |                      |       |                                                                                         |
|------|-------|--------------|-------|----|---|---|----------------------|-------|-----------------------------------------------------------------------------------------|
| 2158 | 2668  | gi 731391510 | 57.05 | 11 | 2 | 2 |                      | 25576 | PREDICTED: uncharacterized protein LOC104879510 isoform X2 [Vitis vinifera]             |
| 2232 | 29061 | gi 225438479 | 57.02 | 4  | 2 | 2 |                      | 91235 | PREDICTED: ribonucleoside-diphosphate reductase large subunit [Vitis vinifera]          |
| 1636 | 18525 | gi 566206477 | 56.97 | 11 | 2 | 1 |                      | 24609 | hypothetical protein POPTR_0015s07620g partial [Populus trichocarpa]                    |
| 1950 | 29037 | gi 224087605 | 56.95 | 5  | 2 | 2 | Carbamidomethylation | 55105 | kinase family protein [Populus trichocarpa]                                             |
| 2870 | 18074 | gi 566161702 | 56.95 | 6  | 2 | 2 |                      | 30568 | Mitochondrial carnitine/acylcarnitine carrier-like family protein [Populus trichocarpa] |
| 1737 | 19762 | gi 566161718 | 56.95 | 3  | 1 | 1 |                      | 43721 | UBIQUITIN-SPECIFIC PROTEASE 20 family protein [Populus trichocarpa]                     |
| 2514 | 19334 | gi 224067846 | 56.82 | 9  | 2 | 2 |                      | 28816 | hypothetical protein POPTR_0002s15600g [Populus trichocarpa]                            |
| 1985 | 19730 | gi 224093270 | 56.78 | 14 | 1 | 1 | Carbamidomethylation | 10603 | hypothetical protein POPTR_0007s03140g [Populus trichocarpa]                            |
| 2354 | 18901 | gi 566198700 | 56.71 | 4  | 2 | 2 |                      | 42593 | hypothetical protein POPTR_0013s00760g [Populus trichocarpa]                            |
| 2558 | 29377 | gi 225442853 | 56.64 | 4  | 1 | 1 | Carbamidomethylation | 47945 | PREDICTED: uncharacterized protein LOC100253140 [Vitis vinifera]                        |
| 2476 | 28980 | gi 566209963 | 56.6  | 5  | 3 | 3 |                      | 90934 | AMP deaminase family protein [Populus trichocarpa]                                      |
| 2118 | 28983 | gi 224108087 | 56.49 | 4  | 3 | 1 | Carbamidomethylation | 59278 | RAN GTPASE ACTIVATING protein 2 [Populus trichocarpa]                                   |
| 2588 | 2854  | gi 731408416 | 56.4  | 4  | 2 | 1 |                      | 53964 | PREDICTED: serine carboxypeptidase-like 13 [Vitis vinifera]                             |
| 2259 | 1346  | gi 225447779 | 56.18 | 4  | 2 | 2 |                      | 49572 | PREDICTED: pinin [Vitis vinifera]                                                       |
| 2502 | 18469 | gi 566187699 | 56.18 | 6  | 2 | 2 |                      | 36049 | ubiquitin fusion degradation UFD1 family protein [Populus trichocarpa]                  |

|      |       |              |       |    |   |   |                      |       |                                                                                               |
|------|-------|--------------|-------|----|---|---|----------------------|-------|-----------------------------------------------------------------------------------------------|
| 2411 | 29356 | gi 225465060 | 56.14 | 3  | 1 | 1 |                      | 50015 | PREDICTED: acetylornithine aminotransferase mitochondrial [Vitis vinifera]                    |
| 2283 | 1793  | gi 225438019 | 56.07 | 4  | 1 | 1 |                      | 44983 | PREDICTED: heterogeneous nuclear ribonucleoprotein 1-like [Vitis vinifera]                    |
| 1863 | 28990 | gi 731393582 | 56.04 | 4  | 3 | 3 |                      | 58065 | PREDICTED: dihydropyrimidinase [Vitis vinifera]                                               |
| 2277 | 3624  | gi 359491024 | 56.03 | 7  | 2 | 2 | Carbamidomethylation | 25764 | PREDICTED: thaumatin-like protein [Vitis vinifera]                                            |
| 1325 | 18810 | gi 566209344 | 55.96 | 7  | 2 | 1 |                      | 27361 | In2-1 family protein [Populus trichocarpa]                                                    |
| 2938 | 1596  | gi 731405420 | 55.89 | 4  | 2 | 1 |                      | 60227 | PREDICTED: reticuline oxidase-like protein [Vitis vinifera]                                   |
| 2725 | 2336  | gi 225441619 | 55.88 | 7  | 1 | 1 |                      | 19639 | PREDICTED: putative H/ACA ribonucleoprotein complex subunit 1-like protein 1 [Vitis vinifera] |
| 2358 | 2411  | gi 225448433 | 55.85 | 6  | 2 | 1 | Carbamidomethylation | 67768 | PREDICTED: phosphoinositide phospholipase C 2 [Vitis vinifera]                                |
| 2254 | 18271 | gi 224105935 | 55.85 | 11 | 2 | 2 | Carbamidomethylation | 24127 | RAN BINDING protein 1 [Populus trichocarpa]                                                   |
| 2160 | 29248 | gi 566178170 | 55.83 | 5  | 2 | 1 |                      | 51300 | hypothetical protein POPTR_0006s25850g [Populus trichocarpa]                                  |
| 2492 | 19736 | gi 224086707 | 55.81 | 2  | 1 | 1 | Carbamidomethylation | 73852 | glycosyl hydrolase family protein [Populus trichocarpa]                                       |
| 1732 | 1758  | gi 359495836 | 55.66 | 3  | 2 | 2 |                      | 64385 | PREDICTED: galacturonosyltransferase 8 [Vitis vinifera]                                       |
| 2562 | 29618 | gi 225432296 | 55.65 | 10 | 1 | 1 |                      | 16839 | PREDICTED: uncharacterized protein LOC100249327 [Vitis vinifera]                              |
| 2365 | 18984 | gi 566208306 | 55.57 | 5  | 1 | 1 | Carbamidomethylation | 28285 | hypothetical protein POPTR_0016s02570g [Populus trichocarpa]                                  |
| 2412 | 29388 | gi 224101457 | 55.55 | 10 | 1 | 1 |                      | 19688 | RNA recognition motif-containing family protein [Populus trichocarpa]                         |
| 1859 | 1026  | gi 225443231 | 55.51 | 6  | 3 | 2 |                      | 50032 | PREDICTED: methanol O-anthraniloyltransferase [Vitis vinifera]                                |

|      |       |              |       |    |   |   |                      |        |                                                                                  |
|------|-------|--------------|-------|----|---|---|----------------------|--------|----------------------------------------------------------------------------------|
| 2565 | 19710 | gi 225444714 | 55.48 | 12 | 1 | 1 | Carbamidomethylation | 13434  | PREDICTED: RING-box protein 1a [Vitis vinifera]                                  |
| 2003 | 1794  | gi 225452562 | 55.43 | 7  | 2 | 2 |                      | 35739  | PREDICTED: peroxidase 31-like [Vitis vinifera]                                   |
| 2557 | 29352 | gi 225465543 | 55.43 | 8  | 2 | 1 |                      | 22596  | PREDICTED: uncharacterized protein LOC100263614 [Vitis vinifera]                 |
| 2233 | 18943 | gi 224140195 | 55.41 | 12 | 2 | 2 |                      | 30031  | 29 kDa ribonucleoprotein [Populus trichocarpa]                                   |
| 2886 | 29669 | gi 359493330 | 55.39 | 5  | 1 | 1 | Carbamidomethylation | 33897  | PREDICTED: carboxymethylenebutenolidase homolog [Vitis vinifera]                 |
| 1717 | 1592  | gi 225459957 | 55.32 | 12 | 2 | 2 |                      | 21003  | PREDICTED: uncharacterized protein LOC100261996 [Vitis vinifera]                 |
| 2942 | 29268 | gi 731378520 | 55.24 | 9  | 2 | 2 | Carbamidomethylation | 23444  | PREDICTED: RNA polymerase II transcriptional coactivator KELP [Vitis vinifera]   |
| 2548 | 2871  | gi 225455386 | 55.2  | 2  | 2 | 1 |                      | 65593  | PREDICTED: probable pectinesterase/pectinesterase inhibitor 34 [Vitis vinifera]  |
| 1787 | 2039  | gi 225449198 | 55.13 | 6  | 2 | 1 |                      | 31414  | PREDICTED: eukaryotic translation initiation factor 3 subunit F [Vitis vinifera] |
| 2332 | 19031 | gi 224077834 | 55.1  | 3  | 1 | 1 | Carbamidomethylation | 56616  | phenylalanyl-tRNA synthetase alpha chain family protein [Populus trichocarpa]    |
| 3174 | 19090 | gi 566204168 | 55.07 | 3  | 1 | 1 |                      | 56223  | Citrate synthase family protein [Populus trichocarpa]                            |
| 2338 | 29960 | gi 566149116 | 55.04 | 5  | 2 | 2 |                      | 39813  | nuclear RNA-binding family protein [Populus trichocarpa]                         |
| 2306 | 18004 | gi 224086130 | 54.74 | 8  | 2 | 1 | Carbamidomethylation | 32243  | U2 snRNP auxiliary factor small subunit family protein [Populus trichocarpa]     |
| 2236 | 29135 | gi 224105121 | 54.74 | 2  | 2 | 2 |                      | 98894  | hypothetical protein POPTR_0009s14030g [Populus trichocarpa]                     |
| 2061 | 23574 | gi 731397903 | 54.71 | 2  | 2 | 1 |                      | 174618 | PREDICTED: DNA (cytosine-5)-methyltransferase 1-like [Vitis vinifera]            |

|      |       |              |       |    |   |   |                      |        |                                                                                                      |
|------|-------|--------------|-------|----|---|---|----------------------|--------|------------------------------------------------------------------------------------------------------|
| 2364 | 29812 | gi 224136252 | 54.7  | 19 | 1 | 1 | Carbamidomethylation | 8798   | hypothetical protein POPTR_0015s11410g [Populus trichocarpa]                                         |
| 3688 | 29813 | gi 731383113 | 54.69 | 8  | 1 | 1 | Carbamidomethylation | 27145  | PREDICTED: zinc finger protein GIS2-like [Vitis vinifera]                                            |
| 2165 | 1981  | gi 731400731 | 54.64 | 7  | 3 | 3 |                      | 35100  | PREDICTED: histone deacetylase HDT1 [Vitis vinifera]                                                 |
| 1813 | 1078  | gi 359495228 | 54.61 | 2  | 1 | 1 |                      | 81899  | PREDICTED: far upstream element-binding protein 1 isoform X2 [Vitis vinifera]                        |
| 2771 | 29342 | gi 731438722 | 54.6  | 2  | 1 | 1 |                      | 104093 | PREDICTED: uncharacterized protein LOC100263199 partial [Vitis vinifera]                             |
| 2724 | 29431 | gi 359475310 | 54.58 | 4  | 1 | 1 |                      | 52362  | PREDICTED: glucan endo-1 3-beta-D-glucosidase [Vitis vinifera]                                       |
| 3330 | 29469 | gi 224075888 | 54.52 | 4  | 1 | 1 | Carbamidomethylation | 33209  | transcription factor family protein [Populus trichocarpa]                                            |
| 1853 | 29932 | gi 225449374 | 54.49 | 7  | 2 | 2 |                      | 28605  | PREDICTED: uncharacterized protein At2g39795 mitochondrial [Vitis vinifera]                          |
| 1914 | 19728 | gi 224070184 | 54.49 | 11 | 1 | 1 |                      | 18056  | deoxyuridine 5'-triphosphate nucleotidohydrolase family protein [Populus trichocarpa]                |
| 2598 | 3507  | gi 731400520 | 54.44 | 3  | 2 | 1 |                      | 70745  | PREDICTED: pentatricopeptide repeat-containing protein At1g80270 mitochondrial-like [Vitis vinifera] |
| 2768 | 2426  | gi 225437596 | 54.41 | 2  | 2 | 1 |                      | 94375  | PREDICTED: receptor-like protein kinase ANXUR1 [Vitis vinifera]                                      |
| 2366 | 2473  | gi 225465847 | 54.4  | 8  | 1 | 1 |                      | 21605  | PREDICTED: NADPH:quinone oxidoreductase [Vitis vinifera]                                             |
| 2446 | 20005 | gi 224111560 | 54.39 | 3  | 2 | 1 | Carbamidomethylation | 96995  | hydroxyproline-rich glycoprotein [Populus trichocarpa]                                               |
| 2947 | 29304 | gi 566197864 | 54.37 | 11 | 2 | 2 |                      | 33444  | hypothetical protein POPTR_0012s10940g [Populus trichocarpa]                                         |
| 1889 | 18109 | gi 566168240 | 54.35 | 3  | 2 | 1 | Carbamidomethylation | 55680  | hypothetical protein POPTR_0004s23390g [Populus trichocarpa]                                         |

|      |       |              |       |    |   |   |                      |        |                                                                                                   |
|------|-------|--------------|-------|----|---|---|----------------------|--------|---------------------------------------------------------------------------------------------------|
| 1984 | 1795  | gi 225465530 | 54.34 | 5  | 2 | 1 | Carbamidomethylation | 37226  | PREDICTED: cinnamoyl-CoA reductase 1 [Vitis vinifera]                                             |
| 2100 | 18348 | gi 566173129 | 54.28 | 3  | 1 | 1 |                      | 41052  | hypothetical protein POPTR_0005s25100g [Populus trichocarpa]                                      |
| 2302 | 1731  | gi 359489456 | 54.22 | 4  | 1 | 1 |                      | 26638  | PREDICTED: vesicle-associated protein 1-2 [Vitis vinifera]                                        |
| 2683 | 4884  | gi 359476827 | 54.2  | 0  | 1 | 1 |                      | 440796 | PREDICTED: transcription-associated protein 1 [Vitis vinifera]                                    |
| 2552 | 3013  | gi 731391200 | 54.18 | 15 | 2 | 2 | Carbamidomethylation | 18111  | PREDICTED: peptidyl-prolyl cis-trans isomerase FKBP16-3 chloroplastic isoform X2 [Vitis vinifera] |
| 2321 | 29360 | gi 225448412 | 54.14 | 7  | 2 | 1 | Carbamidomethylation | 28575  | PREDICTED: GDSL esterase/lipase CPRD49 [Vitis vinifera]                                           |
| 2047 | 29009 | gi 731402039 | 54.04 | 8  | 2 | 2 |                      | 31328  | PREDICTED: protein FLX-like 3 isoform X2 [Vitis vinifera]                                         |
| 1935 | 18906 | gi 566208409 | 54.04 | 3  | 2 | 1 |                      | 57917  | hypothetical protein POPTR_0016s03090g [Populus trichocarpa]                                      |
| 2718 | 29295 | gi 731399352 | 53.93 | 5  | 1 | 1 | Carbamidomethylation | 35023  | PREDICTED: translin isoform X2 [Vitis vinifera]                                                   |
| 2880 | 29580 | gi 359486553 | 53.92 | 5  | 1 | 1 |                      | 32528  | PREDICTED: zinc finger CCCH domain-containing protein 11 [Vitis vinifera]                         |
| 2778 | 2127  | gi 731439308 | 53.92 | 4  | 1 | 1 |                      | 45537  | PREDICTED: fumarylacetoacetase isoform X1 [Vitis vinifera]                                        |
| 2825 | 19580 | gi 566155691 | 53.86 | 1  | 1 | 1 |                      | 99018  | ubiquitin family protein [Populus trichocarpa]                                                    |
| 2961 | 4942  | gi 731401567 | 53.84 | 4  | 1 | 1 |                      | 45798  | PREDICTED: 4-coumarate--CoA ligase-like 7 [Vitis vinifera]                                        |
| 2593 | 18537 | gi 566159086 | 53.81 | 3  | 2 | 1 |                      | 61936  | hypothetical protein POPTR_0002s20370g [Populus trichocarpa]                                      |
| 2962 | 29819 | gi 225440520 | 53.7  | 5  | 1 | 1 |                      | 31574  | PREDICTED: probable proteasome inhibitor [Vitis vinifera]                                         |
| 2944 | 29289 | gi 566153022 | 53.64 | 8  | 2 | 1 |                      | 40170  | hypothetical protein POPTR_0001s35950g partial [Populus trichocarpa]                              |

|      |       |              |       |    |   |   |                      |       |                                                                                                                |
|------|-------|--------------|-------|----|---|---|----------------------|-------|----------------------------------------------------------------------------------------------------------------|
| 2335 | 2376  | gi 731384061 | 53.54 | 3  | 1 | 1 |                      | 47636 | PREDICTED: LL-diaminopimelate aminotransferase chloroplastic isoform X6 [Vitis vinifera]                       |
| 2104 | 2207  | gi 225435594 | 53.47 | 1  | 1 | 1 |                      | 72574 | PREDICTED: selenoprotein O [Vitis vinifera]                                                                    |
| 2516 | 29321 | gi 224081334 | 53.41 | 4  | 1 | 1 |                      | 48708 | hypothetical protein POPTR_0005s09200g [Populus trichocarpa]                                                   |
| 1739 | 2470  | gi 225442639 | 53.35 | 9  | 1 | 1 |                      | 15488 | PREDICTED: uncharacterized protein LOC100260053 [Vitis vinifera]                                               |
| 1860 | 1779  | gi 225448795 | 53.29 | 11 | 3 | 3 | Carbamidomethylation | 19172 | PREDICTED: cytochrome c oxidase subunit 6b-1 isoform X4 [Vitis vinifera]                                       |
| 2253 | 19154 | gi 566260103 | 53.25 | 9  | 2 | 1 |                      | 27424 | hypothetical protein POPTR_0021s00560g [Populus trichocarpa]                                                   |
| 2769 | 29302 | gi 224064484 | 53.21 | 3  | 1 | 1 |                      | 66420 | arginyl-tRNA synthetase family protein [Populus trichocarpa]                                                   |
| 1980 | 18783 | gi 224101527 | 53.18 | 5  | 2 | 1 |                      | 35400 | peroxidase 40 family protein [Populus trichocarpa]                                                             |
| 2141 | 18112 | gi 224065405 | 53.09 | 14 | 1 | 1 |                      | 8817  | wound-responsive family protein [Populus trichocarpa]                                                          |
| 2367 | 18343 | gi 566161304 | 53.02 | 4  | 1 | 1 |                      | 52669 | hypothetical protein POPTR_0003s07020g [Populus trichocarpa]                                                   |
| 2943 | 5131  | gi 526117689 | 53.02 | 5  | 2 | 2 |                      | 52463 | hexokinase [Vitis vinifera]                                                                                    |
| 2974 | 19328 | gi 225444641 | 53.01 | 3  | 2 | 2 | Oxidation (M)        | 59678 | PREDICTED: 3-oxoacyl-[acyl-carrier-protein] synthase II chloroplastic [Vitis vinifera]                         |
| 3689 | 3539  | gi 731378986 | 52.99 | 13 | 1 | 1 |                      | 13972 | PREDICTED: LOW QUALITY PROTEIN: mitochondrial import inner membrane translocase subunit Tim13 [Vitis vinifera] |
| 2818 | 20759 | gi 225463758 | 52.99 | 6  | 2 | 2 |                      | 43390 | PREDICTED: reticulocalbin-2 [Vitis vinifera]                                                                   |
| 2554 | 1851  | gi 225439145 | 52.96 | 3  | 1 | 1 |                      | 37191 | PREDICTED: grpE protein homolog mitochondrial isoform X1 [Vitis vinifera]                                      |

|      |       |              |       |    |   |   |                      |        |                                                                             |
|------|-------|--------------|-------|----|---|---|----------------------|--------|-----------------------------------------------------------------------------|
| 2744 | 29286 | gi 566160921 | 52.94 | 1  | 1 | 1 |                      | 109190 | hypothetical protein POPTR_0003s05060g [Populus trichocarpa]                |
| 3536 | 29636 | gi 731397329 | 52.86 | 2  | 1 | 1 |                      | 72522  | PREDICTED: uncharacterized protein LOC100242349 isoform X2 [Vitis vinifera] |
| 2953 | 29478 | gi 224117526 | 52.82 | 10 | 1 | 1 | Carbamidomethylation | 23539  | OTU-like cysteine protease family protein [Populus trichocarpa]             |
| 2315 | 2180  | gi 225428049 | 52.81 | 3  | 1 | 1 |                      | 42284  | PREDICTED: glycerate dehydrogenase HPR peroxisomal [Vitis vinifera]         |
| 2145 | 19744 | gi 224137260 | 52.73 | 12 | 1 | 1 |                      | 11459  | hypothetical protein POPTR_0016s01100g [Populus trichocarpa]                |
| 2117 | 19229 | gi 566165862 | 52.72 | 7  | 3 | 3 |                      | 41915  | hypothetical protein POPTR_0004s10130g [Populus trichocarpa]                |
| 2207 | 19950 | gi 224060461 | 52.6  | 6  | 2 | 1 |                      | 39296  | mannitol dehydrogenase 1 family protein [Populus trichocarpa]               |
| 2015 | 2958  | gi 731419100 | 52.56 | 6  | 1 | 1 | Carbamidomethylation | 19892  | PREDICTED: universal stress protein A-like protein [Vitis vinifera]         |
| 2128 | 29125 | gi 225457807 | 52.55 | 10 | 2 | 2 |                      | 20135  | PREDICTED: thioredoxin [Vitis vinifera]                                     |
| 2357 | 29345 | gi 566204667 | 52.54 | 3  | 2 | 2 | Carbamidomethylation | 93158  | hypothetical protein POPTR_0014s16780g [Populus trichocarpa]                |
| 2949 | 29348 | gi 731402497 | 52.54 | 5  | 2 | 2 |                      | 46720  | PREDICTED: nuclear pore complex protein NUP50A [Vitis vinifera]             |
| 2607 | 19253 | gi 225457361 | 52.52 | 6  | 1 | 1 |                      | 29994  | PREDICTED: ribulose-phosphate 3-epimerase chloroplastic [Vitis vinifera]    |
| 2836 | 30023 | gi 359487013 | 52.51 | 3  | 2 | 2 |                      | 55071  | PREDICTED: uncharacterized protein LOC100259997 [Vitis vinifera]            |
| 2006 | 1619  | gi 225461983 | 52.43 | 5  | 2 | 1 |                      | 36179  | PREDICTED: heterogeneous nuclear ribonucleoprotein 1 [Vitis vinifera]       |

|      |       |              |       |    |   |   |                      |        |                                                                                         |
|------|-------|--------------|-------|----|---|---|----------------------|--------|-----------------------------------------------------------------------------------------|
| 2939 | 29250 | gi 731400636 | 52.43 | 7  | 2 | 2 | Carbamidomethylation | 44292  | PREDICTED: DEAD-box ATP-dependent RNA helicase 38 isoform X2 [Vitis vinifera]           |
| 2466 | 2215  | gi 731411822 | 52.41 | 5  | 1 | 1 | Carbamidomethylation | 29958  | PREDICTED: serine/arginine-rich splicing factor RS2Z33-like isoform X2 [Vitis vinifera] |
| 2313 | 2102  | gi 225434197 | 52.4  | 6  | 2 | 1 | Carbamidomethylation | 38070  | PREDICTED: 2-alkenal reductase (NADP(+)-dependent) [Vitis vinifera]                     |
| 2826 | 29467 | gi 224142233 | 52.36 | 6  | 2 | 2 |                      | 36105  | Peroxidase 16 precursor family protein [Populus trichocarpa]                            |
| 1748 | 1743  | gi 225441809 | 52.28 | 29 | 3 | 3 |                      | 8917   | PREDICTED: uncharacterized protein LOC100245204 isoform X3 [Vitis vinifera]             |
| 2822 | 4692  | gi 731403895 | 52.16 | 2  | 1 | 1 |                      | 86125  | PREDICTED: cycloartenol synthase-like [Vitis vinifera]                                  |
| 3432 | 29501 | gi 566168456 | 52.06 | 2  | 1 | 1 |                      | 107171 | hypothetical protein POPTR_0004s24340g [Populus trichocarpa]                            |
| 2948 | 29317 | gi 225426084 | 52.05 | 13 | 2 | 2 |                      | 20541  | PREDICTED: disease resistance response protein 206 [Vitis vinifera]                     |
| 2353 | 1321  | gi 225424750 | 52.01 | 17 | 2 | 2 | Carbamidomethylation | 11841  | PREDICTED: gibberellin-regulated protein 11 [Vitis vinifera]                            |
| 2281 | 29312 | gi 566171425 | 52    | 2  | 1 | 1 |                      | 50173  | hypothetical protein POPTR_0005s14880g [Populus trichocarpa]                            |
| 2449 | 29169 | gi 225434156 | 51.95 | 1  | 1 | 1 | Carbamidomethylation | 102086 | PREDICTED: formin-like protein 1 [Vitis vinifera]                                       |
| 1637 | 29149 | gi 566192982 | 51.85 | 3  | 2 | 1 |                      | 59112  | calcium-binding EF hand family protein [Populus trichocarpa]                            |
| 1874 | 1617  | gi 225429460 | 51.85 | 9  | 1 | 1 |                      | 14040  | PREDICTED: uncharacterized protein LOC100267911 [Vitis vinifera]                        |
| 2876 | 29316 | gi 566211927 | 51.8  | 5  | 2 | 2 |                      | 43994  | hypothetical protein POPTR_0017s07040g [Populus trichocarpa]                            |
| 2956 | 29522 | gi 359488959 | 51.73 | 1  | 1 | 1 |                      | 117470 | PREDICTED: probable ubiquitin conjugation factor E4 [Vitis vinifera]                    |



|      |       |              |       |   |   |   |                      |        |                                                                                          |
|------|-------|--------------|-------|---|---|---|----------------------|--------|------------------------------------------------------------------------------------------|
| 2421 | 2394  | gi 225423637 | 51.68 | 3 | 1 | 1 | Carbamidomethylation | 53687  | PREDICTED: UDP-N-acetylglucosamine diphosphorylase 1 [Vitis vinifera]                    |
| 2014 | 19737 | gi 224070843 | 51.51 | 8 | 1 | 1 |                      | 19159  | glutaredoxin family protein [Populus trichocarpa]                                        |
| 2515 | 29307 | gi 566167103 | 51.43 | 1 | 1 | 1 |                      | 145388 | hypothetical protein POPTR_0004s17740g [Populus trichocarpa]                             |
| 2369 | 2315  | gi 731376404 | 51.35 | 7 | 1 | 1 | Carbamidomethylation | 28963  | PREDICTED: chlorophyll a-b binding protein chloroplastic [Vitis vinifera]                |
| 2950 | 19375 | gi 566186176 | 51.32 | 3 | 2 | 2 |                      | 108942 | hypothetical protein POPTR_0009s03980g [Populus trichocarpa]                             |
| 3324 | 20043 | gi 731393417 | 51.29 | 3 | 1 | 1 |                      | 43134  | PREDICTED: probable linoleate 9S-lipoxygenase 5 [Vitis vinifera]                         |
| 2521 | 19708 | gi 224073126 | 51.25 | 4 | 1 | 1 |                      | 38413  | hypothetical protein POPTR_0003s20890g [Populus trichocarpa]                             |
| 2767 | 29109 | gi 224104085 | 51.25 | 5 | 2 | 1 |                      | 42423  | ULTRACURVATA 2 family protein [Populus trichocarpa]                                      |
| 2328 | 2026  | gi 359492937 | 51.23 | 2 | 1 | 1 |                      | 46528  | PREDICTED: aspartic proteinase nepenthesin-1 [Vitis vinifera]                            |
| 2596 | 20092 | gi 731380117 | 51.22 | 6 | 1 | 1 |                      | 27501  | PREDICTED: thylakoid luminal protein At1g12250 chloroplastic isoform X3 [Vitis vinifera] |
| 3436 | 29578 | gi 566206225 | 51.22 | 5 | 1 | 1 | Carbamidomethylation | 38607  | hypothetical protein POPTR_0015s06550g [Populus trichocarpa]                             |
| 2007 | 18582 | gi 566156002 | 51.21 | 4 | 2 | 1 |                      | 37272  | hypothetical protein POPTR_0002s03260g [Populus trichocarpa]                             |
| 2166 | 5205  | gi 359482448 | 51.17 | 2 | 2 | 1 | Carbamidomethylation | 83440  | PREDICTED: subtilisin-like protease [Vitis vinifera]                                     |
| 2464 | 19140 | gi 225437598 | 51.17 | 1 | 1 | 1 |                      | 130089 | PREDICTED: nodal modulator 1 [Vitis vinifera]                                            |
| 2571 | 2549  | gi 359490081 | 51.15 | 3 | 1 | 1 | Carbamidomethylation | 37910  | PREDICTED: probable isoaspartyl peptidase/L-asparaginase 3 isoform X1 [Vitis vinifera]   |

|      |       |              |       |    |   |   |                      |        |                                                                                            |
|------|-------|--------------|-------|----|---|---|----------------------|--------|--------------------------------------------------------------------------------------------|
| 1982 | 18866 | gi 224108744 | 51.15 | 7  | 2 | 1 |                      | 29000  | enoyl-CoA hydratase/isomerase family protein [Populus trichocarpa]                         |
| 2591 | 7334  | gi 225437581 | 51.13 | 7  | 2 | 1 |                      | 31520  | PREDICTED: ATP-dependent Clp protease proteolytic subunit 5 chloroplastic [Vitis vinifera] |
| 2717 | 29247 | gi 224062053 | 51.11 | 2  | 1 | 1 |                      | 89364  | hypothetical protein POPTR_0002s02940g [Populus trichocarpa]                               |
| 3141 | 29420 | gi 566188679 | 51.02 | 3  | 1 | 1 | Carbamidomethylation | 60358  | hypothetical protein POPTR_0010s01850g [Populus trichocarpa]                               |
| 2355 | 29283 | gi 225440492 | 51    | 8  | 2 | 2 |                      | 30483  | PREDICTED: uracil phosphoribosyltransferase [Vitis vinifera]                               |
| 2257 | 18270 | gi 224122936 | 50.96 | 2  | 2 | 2 |                      | 107004 | Lon protease 2 family protein [Populus trichocarpa]                                        |
| 2649 | 29299 | gi 224069969 | 50.94 | 1  | 1 | 1 |                      | 157594 | CLIP-associating family protein [Populus trichocarpa]                                      |
| 2814 | 29043 | gi 225464033 | 50.9  | 7  | 2 | 2 |                      | 35049  | PREDICTED: ABC transporter I family member 6 chloroplastic [Vitis vinifera]                |
| 2878 | 2693  | gi 225430537 | 50.86 | 9  | 1 | 1 |                      | 13625  | PREDICTED: DNA-directed RNA polymerases II IV and V subunit 11 [Vitis vinifera]            |
| 2604 | 2417  | gi 731400181 | 50.77 | 1  | 1 | 1 |                      | 80319  | PREDICTED: uncharacterized protein C18orf8 isoform X2 [Vitis vinifera]                     |
| 2139 | 19167 | gi 224143157 | 50.7  | 1  | 1 | 1 |                      | 73679  | clathrin assembly family protein [Populus trichocarpa]                                     |
| 1971 | 3012  | gi 225445470 | 50.68 | 35 | 3 | 1 |                      | 13986  | PREDICTED: NHP2-like protein 1 [Vitis vinifera]                                            |
| 2589 | 29244 | gi 224117704 | 50.62 | 4  | 2 | 1 |                      | 70910  | dehydration-responsive family protein [Populus trichocarpa]                                |
| 1987 | 29335 | gi 225466271 | 50.6  | 10 | 2 | 1 |                      | 21853  | PREDICTED: ras-related protein Rab5 [Vitis vinifera]                                       |
| 1752 | 2723  | gi 359485189 | 50.56 | 3  | 2 | 1 | Carbamidomethylation | 59681  | PREDICTED: aspartic proteinase nepenthesin-2 [Vitis vinifera]                              |
| 1513 | 1828  | gi 225434253 | 50.49 | 5  | 2 | 1 |                      | 34679  | PREDICTED: uncharacterized protein LOC100266227 isoform X2 [Vitis vinifera]                |

|      |       |              |       |   |   |   |                      |        |                                                                                           |
|------|-------|--------------|-------|---|---|---|----------------------|--------|-------------------------------------------------------------------------------------------|
| 2527 | 20110 | gi 566207660 | 50.48 | 7 | 1 | 1 |                      | 21645  | cytochrome b5 domain-containing family protein [Populus trichocarpa]                      |
| 2823 | 2395  | gi 225435776 | 50.43 | 3 | 1 | 1 |                      | 66471  | PREDICTED: probable lysine--tRNA ligase cytoplasmic [Vitis vinifera]                      |
| 1434 | 1422  | gi 731439999 | 50.38 | 2 | 2 | 1 | Carbamidomethylation | 80675  | PREDICTED: primary amine oxidase-like [Vitis vinifera]                                    |
| 2600 | 18828 | gi 566208534 | 50.32 | 2 | 1 | 1 |                      | 50151  | chloroplast cystathionine beta lyase family protein [Populus trichocarpa]                 |
| 2161 | 2627  | gi 731393556 | 50.31 | 7 | 2 | 2 |                      | 29837  | PREDICTED: rhodanese-like/PpiC domain-containing protein 12 isoform X2 [Vitis vinifera]   |
| 2049 | 3312  | gi 225439821 | 50.27 | 1 | 2 | 1 | Carbamidomethylation | 116087 | PREDICTED: calcium-transporting ATPase 4 endoplasmic reticulum-type-like [Vitis vinifera] |
| 2238 | 19332 | gi 731424956 | 50.18 | 2 | 1 | 1 |                      | 58108  | PREDICTED: cytochrome P450 71A3-like [Vitis vinifera]                                     |
| 1435 | 1440  | gi 731435737 | 50.1  | 1 | 2 | 1 |                      | 160776 | PREDICTED: putative disease resistance RPP13-like protein 1 isoform X1 [Vitis vinifera]   |
| 2546 | 29133 | gi 225442194 | 50.04 | 6 | 2 | 2 |                      | 45670  | PREDICTED: stomatin-like protein 2 mitochondrial [Vitis vinifera]                         |
| 1182 | 19117 | gi 566173131 | 50.01 | 3 | 1 | 1 |                      | 39060  | dihydroflavonol reductase family protein [Populus trichocarpa]                            |
| 2488 | 29384 | gi 359481218 | 49.93 | 2 | 1 | 1 | Carbamidomethylation | 69404  | PREDICTED: vacuolar-sorting receptor 1 [Vitis vinifera]                                   |
| 3690 | 29828 | gi 224118638 | 49.92 | 5 | 1 | 1 |                      | 36589  | hypothetical protein POPTR_0012s04410g [Populus trichocarpa]                              |
| 1749 | 28998 | gi 566189517 | 49.91 | 6 | 3 | 2 |                      | 53512  | hypothetical protein POPTR_0010s07010g [Populus trichocarpa]                              |
| 2465 | 1735  | gi 225451318 | 49.87 | 4 | 1 | 1 |                      | 37997  | PREDICTED: probable aldo-keto reductase 1 [Vitis vinifera]                                |
| 2089 | 1096  | gi 225445041 | 49.8  | 4 | 2 | 1 |                      | 54472  | PREDICTED: mitochondrial-processing peptidase subunit alpha [Vitis vinifera]              |
| 2235 | 29130 | gi 731385930 | 49.66 | 2 | 3 | 3 |                      | 98079  | PREDICTED: ABC transporter F family member 4 [Vitis vinifera]                             |

|      |       |              |       |    |   |   |                      |       |                                                                         |
|------|-------|--------------|-------|----|---|---|----------------------|-------|-------------------------------------------------------------------------|
| 2720 | 3537  | gi 225436003 | 49.66 | 4  | 1 | 1 | Carbamidomethylation | 31003 | PREDICTED: NADH--cytochrome b5 reductase 1 [Vitis vinifera]             |
| 2834 | 20027 | gi 225456703 | 49.62 | 11 | 1 | 1 |                      | 17349 | PREDICTED: ubiquitin-conjugating enzyme E2 2 [Vitis vinifera]           |
| 3269 | 2365  | gi 225441864 | 49.53 | 3  | 1 | 1 | Carbamidomethylation | 57917 | PREDICTED: thioredoxin reductase NTRC [Vitis vinifera]                  |
| 2504 | 28999 | gi 566201913 | 49.44 | 5  | 3 | 2 | Carbamidomethylation | 82038 | hypothetical protein POPTR_0014s01910g [Populus trichocarpa]            |
| 2378 | 19946 | gi 566206307 | 49.41 | 3  | 1 | 1 |                      | 42484 | nuclear transport factor 2 family protein [Populus trichocarpa]         |
| 1960 | 1908  | gi 225424859 | 49.39 | 4  | 1 | 1 |                      | 25630 | PREDICTED: glutathione S-transferase U17 [Vitis vinifera]               |
| 3692 | 29842 | gi 224099925 | 49.37 | 15 | 1 | 1 |                      | 10144 | hypothetical protein POPTR_0008s16780g [Populus trichocarpa]            |
| 2881 | 29597 | gi 566259532 | 49.35 | 9  | 1 | 1 | Carbamidomethylation | 20415 | cytidine/deoxycytidylate deaminase family protein [Populus trichocarpa] |
| 2951 | 2469  | gi 731394805 | 49.34 | 5  | 1 | 1 |                      | 30948 | PREDICTED: ribosome-recycling factor chloroplastic [Vitis vinifera]     |
| 2436 | 18860 | gi 566192855 | 49.32 | 3  | 1 | 1 |                      | 34711 | hypothetical protein POPTR_0010s26140g [Populus trichocarpa]            |
| 2595 | 2891  | gi 731417628 | 49.28 | 9  | 2 | 2 |                      | 37526 | PREDICTED: methyltransferase-like protein 10 [Vitis vinifera]           |
| 2608 | 19825 | gi 224096296 | 49.27 | 3  | 1 | 1 |                      | 40670 | hypothetical protein POPTR_0007s06500g [Populus trichocarpa]            |
| 2140 | 19792 | gi 566210696 | 49.22 | 3  | 1 | 1 |                      | 42582 | hypothetical protein POPTR_0017s01530g [Populus trichocarpa]            |
| 2964 | 29854 | gi 224130644 | 49.09 | 6  | 1 | 1 |                      | 21941 | GRF1-INTERACTING FACTOR 2 family protein [Populus trichocarpa]          |
| 3441 | 29655 | gi 566151879 | 49.04 | 2  | 1 | 1 |                      | 90753 | hypothetical protein POPTR_0001s30620g [Populus trichocarpa]            |
| 2603 | 29529 | gi 566260143 | 48.93 | 2  | 1 | 1 |                      | 59928 | hypothetical protein POPTR_0021s00750g [Populus trichocarpa]            |

|      |       |              |       |    |   |   |                      |        |                                                                                                            |
|------|-------|--------------|-------|----|---|---|----------------------|--------|------------------------------------------------------------------------------------------------------------|
| 2723 | 29421 | gi 225427100 | 48.9  | 3  | 1 | 1 |                      | 50818  | PREDICTED: glycerol-3-phosphate acyltransferase chloroplastic [Vitis vinifera]                             |
| 2682 | 29347 | gi 566150318 | 48.85 | 3  | 1 | 1 |                      | 44042  | strictosidine synthase family protein [Populus trichocarpa]                                                |
| 2963 | 29831 | gi 225451011 | 48.84 | 10 | 1 | 1 |                      | 19134  | PREDICTED: signal peptidase complex subunit 3B [Vitis vinifera]                                            |
| 3425 | 29448 | gi 731392112 | 48.78 | 4  | 1 | 1 |                      | 52085  | PREDICTED: protein TIC 62 chloroplastic isoform X3 [Vitis vinifera]                                        |
| 1468 | 19865 | gi 566174225 | 48.74 | 5  | 1 | 1 |                      | 22376  | hypothetical protein POPTR_0006s03170g [Populus trichocarpa]                                               |
| 2545 | 29132 | gi 566175887 | 48.74 | 12 | 2 | 2 |                      | 36595  | hypothetical protein POPTR_0006s12310g [Populus trichocarpa]                                               |
| 1962 | 2412  | gi 225453100 | 48.7  | 4  | 1 | 1 |                      | 34790  | PREDICTED: ATP-dependent Clp protease proteolytic subunit 3 chloroplastic [Vitis vinifera]                 |
| 2592 | 2808  | gi 731384926 | 48.6  | 11 | 2 | 2 |                      | 15933  | PREDICTED: 60S ribosomal protein L28-1 isoform X3 [Vitis vinifera]                                         |
| 2334 | 20190 | gi 566181645 | 48.57 | 3  | 1 | 1 |                      | 39280  | hypothetical protein POPTR_0008s01030g [Populus trichocarpa]                                               |
| 2016 | 2467  | gi 225450774 | 48.52 | 4  | 1 | 1 |                      | 35393  | PREDICTED: ATP-dependent Clp protease proteolytic subunit-related protein 3 chloroplastic [Vitis vinifera] |
| 2318 | 2734  | gi 359476844 | 48.48 | 4  | 2 | 1 | Carbamidomethylation | 53239  | PREDICTED: probable serine protease EDA2 isoform X2 [Vitis vinifera]                                       |
| 2256 | 18018 | gi 224083504 | 48.42 | 2  | 2 | 2 |                      | 105368 | hypothetical protein POPTR_0005s07000g [Populus trichocarpa]                                               |
| 3693 | 19018 | gi 224055587 | 48.39 | 4  | 1 | 1 |                      | 40024  | GHMP kinase-related family protein [Populus trichocarpa]                                                   |
| 2887 | 19171 | gi 225445124 | 48.33 | 3  | 1 | 1 |                      | 67861  | PREDICTED: SNW/SKI-interacting protein [Vitis vinifera]                                                    |

|      |       |              |       |    |   |   |                      |        |                                                                                  |
|------|-------|--------------|-------|----|---|---|----------------------|--------|----------------------------------------------------------------------------------|
| 2902 | 2348  | gi 225463408 | 48.24 | 10 | 1 | 1 |                      | 14802  | PREDICTED: DNA-binding protein DDB_G0278111 [Vitis vinifera]                     |
| 2830 | 19831 | gi 224093434 | 48.23 | 3  | 1 | 1 |                      | 37278  | hypothetical protein POPTR_0007s04240g [Populus trichocarpa]                     |
| 2467 | 2147  | gi 225451754 | 48.23 | 3  | 1 | 1 | Carbamidomethylation | 46712  | PREDICTED: eukaryotic translation initiation factor 3 subunit M [Vitis vinifera] |
| 2773 | 1874  | gi 225452328 | 48.14 | 5  | 1 | 1 |                      | 44293  | PREDICTED: altered inheritance of mitochondria protein 32 [Vitis vinifera]       |
| 2138 | 29428 | gi 566192701 | 48.13 | 2  | 1 | 1 |                      | 104522 | DNA gyrase subunit A family protein [Populus trichocarpa]                        |
| 2331 | 19773 | gi 566160873 | 48.11 | 9  | 1 | 1 | Carbamidomethylation | 25118  | hypothetical protein POPTR_0003s04700g [Populus trichocarpa]                     |
| 2510 | 29076 | gi 566182607 | 48.09 | 3  | 2 | 1 |                      | 74847  | hypothetical protein POPTR_0008s06060g [Populus trichocarpa]                     |
| 1653 | 29254 | gi 225448661 | 48.04 | 16 | 2 | 2 |                      | 14325  | PREDICTED: 40S ribosomal protein S26-3 [Vitis vinifera]                          |
| 2564 | 2806  | gi 731411414 | 47.95 | 3  | 1 | 1 |                      | 57917  | PREDICTED: polycopene isomerase chloroplastic isoform X2 [Vitis vinifera]        |
| 2291 | 30025 | gi 225434658 | 47.94 | 15 | 2 | 2 |                      | 9074   | PREDICTED: uncharacterized protein LOC100265554 [Vitis vinifera]                 |
| 3328 | 19112 | gi 566150079 | 47.94 | 1  | 1 | 1 |                      | 116365 | hypothetical protein POPTR_0001s20900g [Populus trichocarpa]                     |
| 2743 | 3398  | gi 225424148 | 47.92 | 2  | 2 | 1 | Carbamidomethylation | 98262  | PREDICTED: ALG-2 interacting protein X [Vitis vinifera]                          |
| 2697 | 1261  | gi 225452863 | 47.89 | 2  | 1 | 1 | Carbamidomethylation | 58071  | PREDICTED: KH domain-containing protein At4g18375 [Vitis vinifera]               |
| 2833 | 29600 | gi 224128744 | 47.86 | 7  | 1 | 1 |                      | 19295  | hypothetical protein POPTR_0014s13900g [Populus trichocarpa]                     |

|      |       |              |       |    |   |   |                      |       |                                                                                          |
|------|-------|--------------|-------|----|---|---|----------------------|-------|------------------------------------------------------------------------------------------|
| 2371 | 29858 | gi 731388004 | 47.86 | 8  | 1 | 1 |                      | 18213 | PREDICTED: heterogeneous nuclear ribonucleoprotein F isoform X2 [Vitis vinifera]         |
| 2284 | 19030 | gi 566167266 | 47.79 | 4  | 1 | 1 |                      | 37830 | hypothetical protein POPTR_0004s18610g [Populus trichocarpa]                             |
| 1251 | 2504  | gi 731416298 | 47.79 | 4  | 1 | 1 |                      | 25123 | PREDICTED: eukaryotic translation initiation factor 3 subunit J [Vitis vinifera]         |
| 2894 | 29711 | gi 224140059 | 47.73 | 6  | 1 | 1 | Carbamidomethylation | 29293 | alcohol dehydrogenase family protein [Populus trichocarpa]                               |
| 2945 | 29292 | gi 225462452 | 47.72 | 5  | 2 | 2 |                      | 40230 | PREDICTED: GDSL esterase/lipase At5g45670 [Vitis vinifera]                               |
| 3691 | 29834 | gi 566155559 | 47.68 | 5  | 1 | 1 |                      | 39393 | hypothetical protein POPTR_0002s00720g [Populus trichocarpa]                             |
| 2486 | 29349 | gi 224085427 | 47.67 | 3  | 1 | 1 |                      | 54899 | hypothetical protein POPTR_0005s22910g [Populus trichocarpa]                             |
| 2493 | 2414  | gi 225437209 | 47.66 | 4  | 1 | 1 |                      | 28420 | PREDICTED: NADH dehydrogenase [ubiquinone] flavoprotein 2 mitochondrial [Vitis vinifera] |
| 2599 | 18515 | gi 566245088 | 47.63 | 3  | 1 | 1 |                      | 33717 | Xyloglucan endotransglucosylase/hydrolase protein 9 precursor [Populus trichocarpa]      |
| 2372 | 2189  | gi 526118301 | 47.62 | 4  | 1 | 1 |                      | 41463 | cysteine protease precursor [Vitis vinifera]                                             |
| 2135 | 18776 | gi 566201937 | 47.61 | 19 | 2 | 2 | Carbamidomethylation | 9653  | hypothetical protein POPTR_0014s02030g [Populus trichocarpa]                             |
| 3555 | 29714 | gi 224077096 | 47.6  | 5  | 1 | 1 |                      | 33993 | hypothetical protein POPTR_0004s04550g [Populus trichocarpa]                             |
| 1875 | 29429 | gi 224146385 | 47.6  | 9  | 1 | 1 |                      | 15015 | hypothetical protein POPTR_0019s11300g [Populus trichocarpa]                             |

|      |       |              |       |    |   |   |                      |        |                                                                                                 |
|------|-------|--------------|-------|----|---|---|----------------------|--------|-------------------------------------------------------------------------------------------------|
| 2370 | 19371 | gi 566184421 | 47.52 | 3  | 1 | 1 |                      | 45388  | hypothetical protein POPTR_0008s17030g [Populus trichocarpa]                                    |
| 2144 | 2104  | gi 225456602 | 47.43 | 6  | 1 | 1 |                      | 23813  | PREDICTED: germin-like protein subfamily T member 2 [Vitis vinifera]                            |
| 1254 | 2356  | gi 359497418 | 47.43 | 10 | 1 | 1 |                      | 11555  | PREDICTED: mitochondrial pyruvate carrier 2-like partial [Vitis vinifera]                       |
| 2278 | 5018  | gi 225430908 | 47.34 | 2  | 1 | 1 |                      | 49271  | PREDICTED: putative RNA-binding protein Luc7-like 2 [Vitis vinifera]                            |
| 1846 | 29167 | gi 566192270 | 47.24 | 14 | 2 | 1 |                      | 12361  | Vacuolar ATP synthase subunit G 2 family protein [Populus trichocarpa]                          |
| 2230 | 3260  | gi 731422518 | 47.19 | 2  | 2 | 1 |                      | 100348 | PREDICTED: DNA (cytosine-5)-methyltransferase CMT2-like isoform X1 [Vitis vinifera]             |
| 2526 | 19499 | gi 566209050 | 47.08 | 2  | 1 | 1 |                      | 62817  | hypothetical protein POPTR_0016s06480g [Populus trichocarpa]                                    |
| 2483 | 29159 | gi 566185166 | 47.05 | 4  | 2 | 2 |                      | 63357  | hypothetical protein POPTR_0008s21080g [Populus trichocarpa]                                    |
| 2967 | 29873 | gi 225454793 | 46.94 | 13 | 1 | 1 |                      | 11346  | PREDICTED: NADH dehydrogenase [ubiquinone] iron-sulfur protein 6 mitochondrial [Vitis vinifera] |
| 2903 | 19878 | gi 224086791 | 46.81 | 3  | 1 | 1 |                      | 51097  | hypothetical protein POPTR_0006s03490g [Populus trichocarpa]                                    |
| 3694 | 19442 | gi 224094580 | 46.75 | 4  | 1 | 1 |                      | 38015  | hypothetical protein POPTR_0007s12020g [Populus trichocarpa]                                    |
| 2609 | 18539 | gi 224092348 | 46.61 | 11 | 1 | 1 | Carbamidomethylation | 10699  | hypothetical protein POPTR_0006s25990g [Populus trichocarpa]                                    |
| 1740 | 2187  | gi 359496589 | 46.61 | 3  | 1 | 1 |                      | 41483  | PREDICTED: clathrin light chain 1 [Vitis vinifera]                                              |



|      |       |              |       |   |   |   |                      |        |                                                                                               |
|------|-------|--------------|-------|---|---|---|----------------------|--------|-----------------------------------------------------------------------------------------------|
| 2815 | 5621  | gi 225430474 | 46.59 | 2 | 2 | 2 |                      | 135946 | PREDICTED: DNA-directed RNA polymerases IV and V subunit 2-like [Vitis vinifera]              |
| 2884 | 19210 | gi 566157463 | 46.52 | 1 | 1 | 1 |                      | 101527 | hypothetical protein POPTR_0002s11380g [Populus trichocarpa]                                  |
| 1767 | 29015 | gi 566234018 | 46.47 | 3 | 2 | 2 |                      | 96141  | hypothetical protein POPTR_0019s07200g [Populus trichocarpa]                                  |
| 2506 | 3405  | gi 225458227 | 46.47 | 2 | 1 | 1 |                      | 41470  | PREDICTED: ornithine carbamoyltransferase chloroplastic [Vitis vinifera]                      |
| 2017 | 19259 | gi 566215941 | 46.44 | 2 | 1 | 1 |                      | 50246  | hypothetical protein POPTR_0018s14790g [Populus trichocarpa]                                  |
| 2290 | 29878 | gi 225428753 | 46.41 | 6 | 1 | 1 | Carbamidomethylation | 33195  | PREDICTED: probable carboxylesterase 12 [Vitis vinifera]                                      |
| 1112 | 1764  | gi 359478415 | 46.41 | 3 | 2 | 1 |                      | 58697  | PREDICTED: beta-glucosidase 12 [Vitis vinifera]                                               |
| 2570 | 1816  | gi 225433688 | 46.39 | 3 | 1 | 1 |                      | 38722  | PREDICTED: eukaryotic translation initiation factor 3 subunit H [Vitis vinifera]              |
| 2211 | 29489 | gi 566206658 | 46.38 | 3 | 1 | 1 |                      | 42473  | hypothetical protein POPTR_0015s08730g [Populus trichocarpa]                                  |
| 2333 | 19771 | gi 224106191 | 46.38 | 3 | 1 | 1 | Carbamidomethylation | 35572  | cinnamyl-alcohol dehydrogenase family protein [Populus trichocarpa]                           |
| 2965 | 29863 | gi 731432620 | 46.11 | 3 | 1 | 1 |                      | 72654  | PREDICTED: calcium homeostasis endoplasmic reticulum protein-like isoform X2 [Vitis vinifera] |
| 2487 | 19052 | gi 224056427 | 46.1  | 3 | 1 | 1 |                      | 46693  | C2 domain-containing family protein [Populus trichocarpa]                                     |
| 2612 | 1626  | gi 359482440 | 46.04 | 2 | 1 | 1 |                      | 57853  | PREDICTED: alanine aminotransferase 2 [Vitis vinifera]                                        |
| 1958 | 19216 | gi 566170063 | 46.01 | 4 | 1 | 1 |                      | 32177  | hypothetical protein POPTR_0005s07750g [Populus trichocarpa]                                  |
| 2362 | 19316 | gi 731386000 | 45.98 | 1 | 1 | 1 |                      | 130746 | PREDICTED: trafficking protein particle complex subunit 9 isoform X2 [Vitis vinifera]         |

|      |       |              |       |    |   |   |                      |        |                                                                                                      |
|------|-------|--------------|-------|----|---|---|----------------------|--------|------------------------------------------------------------------------------------------------------|
| 3535 | 29622 | gi 224098848 | 45.94 | 4  | 1 | 1 |                      | 30293  | hypothetical protein POPTR_0008s08330g [Populus trichocarpa]                                         |
| 1978 | 1733  | gi 225429462 | 45.9  | 2  | 2 | 2 |                      | 71749  | PREDICTED: far upstream element-binding protein 2 [Vitis vinifera]                                   |
| 3437 | 29609 | gi 566210253 | 45.84 | 6  | 1 | 1 | Carbamidomethylation | 25571  | hypothetical protein POPTR_0016s14360g [Populus trichocarpa]                                         |
| 3335 | 19398 | gi 566193348 | 45.81 | 2  | 1 | 1 | Carbamidomethylation | 84956  | hypothetical protein POPTR_0011s02570g [Populus trichocarpa]                                         |
| 1139 | 29374 | gi 225437358 | 45.81 | 2  | 2 | 1 |                      | 59869  | PREDICTED: beta-glucosidase 11-like isoform X2 [Vitis vinifera]                                      |
| 2875 | 20322 | gi 224118700 | 45.8  | 2  | 1 | 1 |                      | 66027  | transducin family protein [Populus trichocarpa]                                                      |
| 2957 | 19925 | gi 224079549 | 45.74 | 3  | 1 | 1 | Carbamidomethylation | 44567  | METHIONINE AMINOPEPTIDASE 2A family protein [Populus trichocarpa]                                    |
| 2966 | 29869 | gi 224113857 | 45.68 | 9  | 1 | 1 | Carbamidomethylation | 27332  | hypothetical protein POPTR_0011s00810g [Populus trichocarpa]                                         |
| 1870 | 1097  | gi 731384037 | 45.68 | 5  | 2 | 2 |                      | 37513  | PREDICTED: proline iminopeptidase isoform X2 [Vitis vinifera]                                        |
| 2008 | 29294 | gi 224140325 | 45.61 | 4  | 2 | 1 |                      | 95901  | GAMMA-ADAPTIN 1 family protein [Populus trichocarpa]                                                 |
| 2872 | 29158 | gi 566170688 | 45.28 | 1  | 2 | 2 | Carbamidomethylation | 204912 | DNA-directed RNA polymerase II largest subunit family protein [Populus trichocarpa]                  |
| 2610 | 19881 | gi 224128482 | 45.26 | 13 | 1 | 1 | Carbamidomethylation | 9705   | NADH-ubiquinone oxidoreductase-related family protein [Populus trichocarpa]                          |
| 2879 | 5240  | gi 225456794 | 45.22 | 4  | 1 | 1 | Carbamidomethylation | 35026  | PREDICTED: haloacid dehalogenase-like hydrolase domain-containing protein At3g48420 [Vitis vinifera] |
| 2090 | 2487  | gi 225438081 | 45.19 | 5  | 2 | 2 |                      | 51926  | PREDICTED: casein kinase I-like [Vitis vinifera]                                                     |

|      |       |              |       |   |   |   |                      |       |                                                                                       |
|------|-------|--------------|-------|---|---|---|----------------------|-------|---------------------------------------------------------------------------------------|
| 2824 | 29451 | gi 566161694 | 45.09 | 3 | 1 | 1 |                      | 48027 | hypothetical protein POPTR_0003s08980g [Populus trichocarpa]                          |
| 2373 | 19960 | gi 566150184 | 45.03 | 5 | 1 | 1 |                      | 23580 | hypothetical protein POPTR_0001s21460g [Populus trichocarpa]                          |
| 2594 | 3547  | gi 731380326 | 45.03 | 5 | 2 | 2 |                      | 36873 | PREDICTED: palmitoyl-protein thioesterase 1-like [Vitis vinifera]                     |
| 2567 | 2457  | gi 526117557 | 45.02 | 4 | 1 | 1 |                      | 32485 | alpha-soluble NSF attachment protein [Vitis vinifera]                                 |
| 3422 | 2143  | gi 225444537 | 45.01 | 3 | 1 | 1 | Carbamidomethylation | 42935 | PREDICTED: uncharacterized protein LOC100253669 [Vitis vinifera]                      |
| 2437 | 19146 | gi 566160209 | 44.98 | 2 | 1 | 1 | Carbamidomethylation | 54758 | hypothetical protein POPTR_0003s011001g partial [Populus trichocarpa]                 |
| 3699 | 29924 | gi 224064766 | 44.89 | 2 | 1 | 1 | Carbamidomethylation | 95047 | transport family protein [Populus trichocarpa]                                        |
| 3338 | 2231  | gi 225456155 | 44.81 | 2 | 1 | 1 |                      | 64675 | PREDICTED: translocon at the outer membrane of chloroplasts 64 [Vitis vinifera]       |
| 3695 | 29875 | gi 566179360 | 44.8  | 4 | 1 | 1 |                      | 46766 | hypothetical protein POPTR_0007s03190g [Populus trichocarpa]                          |
| 2057 | 19886 | gi 224098816 | 44.71 | 3 | 1 | 1 |                      | 45803 | latex abundant family protein [Populus trichocarpa]                                   |
| 3545 | 29660 | gi 566189493 | 44.56 | 4 | 1 | 1 |                      | 42450 | hypothetical protein POPTR_0010s06900g [Populus trichocarpa]                          |
| 2613 | 29927 | gi 225454190 | 44.51 | 5 | 1 | 1 |                      | 23301 | PREDICTED: uncharacterized protein LOC100244723 [Vitis vinifera]                      |
| 2968 | 29876 | gi 225456211 | 44.5  | 4 | 1 | 1 |                      | 40298 | PREDICTED: deoxyhypusine synthase [Vitis vinifera]                                    |
| 3696 | 29886 | gi 359490488 | 44.5  | 8 | 1 | 1 |                      | 33858 | PREDICTED: short-chain dehydrogenase TIC 32 chloroplastic isoform X1 [Vitis vinifera] |
| 3442 | 24309 | gi 566183391 | 44.49 | 5 | 1 | 1 |                      | 24918 | hypothetical protein POPTR_0008s11090g [Populus trichocarpa]                          |

|      |       |              |       |    |   |   |                      |        |                                                                                                      |
|------|-------|--------------|-------|----|---|---|----------------------|--------|------------------------------------------------------------------------------------------------------|
| 3546 | 29662 | gi 225429824 | 44.42 | 2  | 1 | 1 |                      | 51346  | PREDICTED: uncharacterized protein LOC100254151 [ <i>Vitis vinifera</i> ]                            |
| 2969 | 29887 | gi 224118830 | 44.35 | 10 | 1 | 1 |                      | 12613  | NADH2 dehydrogenase family protein [ <i>Populus trichocarpa</i> ]                                    |
| 3421 | 29415 | gi 359487063 | 44.33 | 1  | 1 | 1 |                      | 109568 | PREDICTED: valine--tRNA ligase mitochondrial-like [ <i>Vitis vinifera</i> ]                          |
| 3537 | 18968 | gi 224103873 | 44.31 | 4  | 1 | 1 | Carbamidomethylation | 35544  | putative cinnamoyl-CoA reductase family protein [ <i>Populus trichocarpa</i> ]                       |
| 3439 | 29650 | gi 225443254 | 44.3  | 7  | 1 | 1 | Carbamidomethylation | 28438  | PREDICTED: RNA-binding protein 42 [ <i>Vitis vinifera</i> ]                                          |
| 2568 | 19607 | gi 224093148 | 44.24 | 5  | 1 | 1 |                      | 29641  | Tetrapyrrole-binding family protein [ <i>Populus trichocarpa</i> ]                                   |
| 2234 | 18735 | gi 224062667 | 44.2  | 3  | 1 | 1 |                      | 43605  | enoyl-CoA hydratase/isomerase family protein [ <i>Populus trichocarpa</i> ]                          |
| 2258 | 1695  | gi 731408423 | 44.17 | 4  | 2 | 2 | Carbamidomethylation | 43098  | PREDICTED: serine carboxypeptidase-like 18 isoform X4 [ <i>Vitis vinifera</i> ]                      |
| 2614 | 19816 | gi 566197446 | 44.12 | 3  | 1 | 1 |                      | 44436  | hypothetical protein POPTR_0012s08440g [ <i>Populus trichocarpa</i> ]                                |
| 2375 | 19820 | gi 566210973 | 44.07 | 6  | 1 | 1 |                      | 15927  | hypothetical protein POPTR_0017s02810g [ <i>Populus trichocarpa</i> ]                                |
| 2828 | 29474 | gi 566187252 | 43.95 | 2  | 1 | 1 |                      | 66494  | hypothetical protein POPTR_0009s10080g [ <i>Populus trichocarpa</i> ]                                |
| 2018 | 29895 | gi 224080484 | 43.94 | 11 | 1 | 1 |                      | 16572  | Vacuolar ATP synthase 16 kDa proteolipid subunit 1/3/5 family protein [ <i>Populus trichocarpa</i> ] |
| 1250 | 2898  | gi 225431633 | 43.91 | 2  | 1 | 1 |                      | 38428  | PREDICTED: ubiquitin carboxyl-terminal hydrolase isozyme L5 [ <i>Vitis vinifera</i> ]                |
| 2904 | 20082 | gi 566259648 | 43.9  | 7  | 1 | 1 |                      | 16066  | hypothetical protein POPTR_0026s00220g [ <i>Populus trichocarpa</i> ]                                |
| 1514 | 29330 | gi 566210077 | 43.88 | 6  | 2 | 1 |                      | 28007  | ferritin precursor family protein [ <i>Populus trichocarpa</i> ]                                     |

|      |       |              |       |   |   |   |                      |        |                                                                                             |
|------|-------|--------------|-------|---|---|---|----------------------|--------|---------------------------------------------------------------------------------------------|
| 3698 | 7381  | gi 731386977 | 43.85 | 2 | 1 | 1 |                      | 63982  | PREDICTED: D-2-hydroxyglutarate dehydrogenase mitochondrial isoform X2 [Vitis vinifera]     |
| 3697 | 29905 | gi 731389767 | 43.78 | 1 | 1 | 1 |                      | 148262 | PREDICTED: uncharacterized protein LOC100251059 isoform X2 [Vitis vinifera]                 |
| 2970 | 6196  | gi 225428342 | 43.78 | 2 | 1 | 1 |                      | 63050  | PREDICTED: glutamate--tRNA ligase chloroplastic/mitochondrial [Vitis vinifera]              |
| 2191 | 29584 | gi 566211007 | 43.66 | 7 | 1 | 1 |                      | 20326  | HMGI/Y family protein [Populus trichocarpa]                                                 |
| 2520 | 20552 | gi 731427542 | 43.66 | 5 | 1 | 1 |                      | 40531  | PREDICTED: cinnamoyl-CoA reductase 2 isoform X1 [Vitis vinifera]                            |
| 2611 | 29892 | gi 731419051 | 43.65 | 3 | 1 | 1 |                      | 43398  | PREDICTED: anthranilate phosphoribosyltransferase chloroplastic isoform X2 [Vitis vinifera] |
| 3326 | 19138 | gi 566161892 | 43.61 | 4 | 1 | 1 | Carbamidomethylation | 62833  | hypothetical protein POPTR_0003s09970g [Populus trichocarpa]                                |
| 2330 | 19131 | gi 224073524 | 43.5  | 8 | 1 | 1 |                      | 16505  | hypothetical protein POPTR_0003s03980g [Populus trichocarpa]                                |
| 2817 | 17835 | gi 566173634 | 43.49 | 1 | 1 | 1 |                      | 121829 | hypothetical protein POPTR_0005s27880g [Populus trichocarpa]                                |
| 3420 | 29413 | gi 566213840 | 43.48 | 1 | 1 | 1 | Carbamidomethylation | 100766 | hypothetical protein POPTR_0018s02410g [Populus trichocarpa]                                |
| 2376 | 19810 | gi 566163928 | 43.48 | 6 | 1 | 1 |                      | 21587  | disease resistance-responsive family protein [Populus trichocarpa]                          |
| 2525 | 29670 | gi 731425425 | 43.48 | 5 | 1 | 1 |                      | 32384  | PREDICTED: phosphoserine phosphatase chloroplastic [Vitis vinifera]                         |
| 2560 | 19884 | gi 225423730 | 43.47 | 6 | 1 | 1 |                      | 16692  | PREDICTED: glycine cleavage system H protein 2 mitochondrial [Vitis vinifera]               |
| 2874 | 18122 | gi 224085976 | 43.42 | 2 | 1 | 1 |                      | 82530  | prolyl oligopeptidase family protein [Populus trichocarpa]                                  |

|      |       |              |       |    |   |   |                      |       |                                                              |
|------|-------|--------------|-------|----|---|---|----------------------|-------|--------------------------------------------------------------|
| 2819 | 29249 | gi 224100879 | 43.42 | 2  | 1 | 1 | Carbamidomethylation | 41126 | hypothetical protein POPTR_0008s04540g [Populus trichocarpa] |
| 1660 | 19118 | gi 224124994 | 43.37 | 5  | 1 | 1 |                      | 17963 | hypothetical protein POPTR_0013s00850g [Populus trichocarpa] |
| 488  | 29953 | gi 566172133 | 43.23 | 4  | 1 | 1 |                      | 26305 | hypothetical protein POPTR_0005s19050g [Populus trichocarpa] |
| 3268 | 19509 | gi 566157213 | 43.18 | 3  | 1 | 1 |                      | 58089 | seryl-tRNA synthetase family protein [Populus trichocarpa]   |
| 2891 | 19484 | gi 566208951 | 43.15 | 3  | 1 | 1 |                      | 47348 | hypothetical protein POPTR_0016s06010g [Populus trichocarpa] |
| 2374 | 29923 | gi 225459577 | 43.15 | 12 | 1 | 1 |                      | 12290 | PREDICTED: acetyltransferase At1g77540 [Vitis vinifera]      |
| 3272 | 29668 | gi 566207628 | 43.12 | 3  | 1 | 1 |                      | 71422 | hypothetical protein POPTR_0015s14790g [Populus trichocarpa] |
| 3567 | 29925 | gi 566154461 | 43.01 | 4  | 1 | 1 |                      | 46632 | DNA repair protein recA [Populus trichocarpa]                |
| 2954 | 18613 | gi 224109026 | 42.89 | 2  | 1 | 1 |                      | 65580 | diminuto family protein [Populus trichocarpa]                |
| 3700 | 29926 | gi 566152935 | 42.88 | 3  | 1 | 1 | Carbamidomethylation | 44131 | hypothetical protein POPTR_0001s35410g [Populus trichocarpa] |
| 1469 | 19970 | gi 224135953 | 42.79 | 16 | 1 | 1 |                      | 6931  | 40S ribosomal protein S30 [Populus trichocarpa]              |
| 2885 | 19961 | gi 566204052 | 42.75 | 2  | 1 | 1 |                      | 46261 | hypothetical protein POPTR_0014s13120g [Populus trichocarpa] |
| 2448 | 20025 | gi 566211368 | 42.73 | 6  | 2 | 2 |                      | 45725 | hypothetical protein POPTR_0017s04570g [Populus trichocarpa] |
| 2882 | 29625 | gi 566172500 | 42.72 | 2  | 1 | 1 |                      | 66332 | hypothetical protein POPTR_0005s21350g [Populus trichocarpa] |
| 2971 | 29951 | gi 566180089 | 42.69 | 4  | 1 | 1 |                      | 32542 | hypothetical protein POPTR_0007s07510g [Populus trichocarpa] |

|      |       |              |       |    |   |   |                      |       |                                                                                                  |
|------|-------|--------------|-------|----|---|---|----------------------|-------|--------------------------------------------------------------------------------------------------|
| 3701 | 29935 | gi 225458607 | 42.59 | 3  | 1 | 1 |                      | 70485 | PREDICTED: protein CYPRO4 [Vitis vinifera]                                                       |
| 2616 | 5615  | gi 225470242 | 42.59 | 6  | 1 | 1 |                      | 16680 | PREDICTED: uncharacterized protein At5g48480 [Vitis vinifera]                                    |
| 3551 | 19079 | gi 224078604 | 42.47 | 3  | 1 | 1 |                      | 41098 | ATP synthase gamma chain 1 family protein [Populus trichocarpa]                                  |
| 2883 | 29627 | gi 566215393 | 42.45 | 7  | 1 | 1 |                      | 22604 | putative SNARE family protein [Populus trichocarpa]                                              |
| 3531 | 29585 | gi 566147174 | 42.36 | 2  | 1 | 1 |                      | 80454 | hypothetical protein POPTR_0001s04370g [Populus trichocarpa]                                     |
| 3702 | 18833 | gi 224145402 | 42.36 | 17 | 1 | 1 |                      | 8337  | ubiquinol-cytochrome C reductase complex ubiquinone-binding family protein [Populus trichocarpa] |
| 3703 | 29940 | gi 225459538 | 42.28 | 5  | 1 | 1 | Carbamidomethylation | 43711 | PREDICTED: lysM domain-containing GPI-anchored protein 1 [Vitis vinifera]                        |
| 1796 | 29059 | gi 224062521 | 42.19 | 2  | 2 | 1 | Carbamidomethylation | 59330 | RAN GTPASE ACTIVATING protein 1 [Populus trichocarpa]                                            |
| 3704 | 19184 | gi 731399255 | 42.15 | 3  | 1 | 1 |                      | 52783 | PREDICTED: dnaJ protein P58IPK homolog [Vitis vinifera]                                          |
| 2615 | 19033 | gi 526117729 | 42.04 | 3  | 1 | 1 |                      | 61635 | 9 10[9' 10']carotenoid cleavage dioxygenase [Vitis vinifera]                                     |
| 3550 | 29687 | gi 731433331 | 42.01 | 2  | 1 | 1 | Carbamidomethylation | 69344 | PREDICTED: probable 28S rRNA (cytosine(4447)-C(5))-methyltransferase isoform X2 [Vitis vinifera] |
| 2103 | 2206  | gi 225455268 | 41.97 | 5  | 2 | 2 |                      | 34609 | PREDICTED: probable 6-phosphogluconolactonase 4 chloroplastic [Vitis vinifera]                   |
| 2776 | 29450 | gi 224099567 | 41.91 | 6  | 1 | 1 | Carbamidomethylation | 40920 | semialdehyde dehydrogenase family protein [Populus trichocarpa]                                  |
| 2561 | 1933  | gi 225455762 | 41.89 | 2  | 1 | 1 |                      | 67078 | PREDICTED: probable phenylalanine--tRNA ligase beta subunit [Vitis vinifera]                     |
| 1193 | 29787 | gi 224102583 | 41.67 | 2  | 3 | 1 |                      | 93021 | hypothetical protein POPTR_0008s20490g [Populus trichocarpa]                                     |

|      |       |              |       |    |   |   |                      |        |                                                                                               |
|------|-------|--------------|-------|----|---|---|----------------------|--------|-----------------------------------------------------------------------------------------------|
| 3529 | 29573 | gi 731417029 | 41.64 | 3  | 1 | 1 |                      | 55196  | PREDICTED: phosphoribosylaminoimidazole carboxylase chloroplastic isoform X3 [Vitis vinifera] |
| 2888 | 19891 | gi 566202809 | 41.6  | 12 | 1 | 1 |                      | 8349   | Protein transport protein SEC61 beta subunit [Populus trichocarpa]                            |
| 1004 | 19403 | gi 566166342 | 41.51 | 1  | 1 | 1 |                      | 95030  | hypothetical protein POPTR_0004s13420g partial [Populus trichocarpa]                          |
| 3427 | 29456 | gi 224120424 | 41.49 | 2  | 1 | 1 |                      | 147785 | translation initiation factor family protein [Populus trichocarpa]                            |
| 2566 | 2662  | gi 225427778 | 41.48 | 3  | 1 | 1 |                      | 39091  | PREDICTED: epimerase family protein SDR39U1 homolog chloroplastic [Vitis vinifera]            |
| 3433 | 29503 | gi 731420110 | 41.48 | 2  | 1 | 1 |                      | 82139  | PREDICTED: translation initiation factor eIF-2B subunit epsilon [Vitis vinifera]              |
| 2173 | 19883 | gi 566189043 | 41.42 | 4  | 1 | 1 | Carbamidomethylation | 36173  | Peroxidase 6 precursor family protein [Populus trichocarpa]                                   |
| 2360 | 29422 | gi 225451641 | 41.41 | 5  | 2 | 2 |                      | 32577  | PREDICTED: histidine biosynthesis bifunctional protein hisIE chloroplastic [Vitis vinifera]   |
| 3428 | 2631  | gi 225450051 | 41.29 | 3  | 1 | 1 |                      | 39579  | PREDICTED: cycloartenol-C-24-methyltransferase [Vitis vinifera]                               |
| 2617 | 19806 | gi 224113431 | 41.23 | 11 | 1 | 1 |                      | 9789   | hypothetical protein POPTR_0010s24670g [Populus trichocarpa]                                  |
| 2972 | 20226 | gi 566161648 | 41.11 | 5  | 1 | 1 |                      | 17801  | glycine cleavage system protein H precursor [Populus trichocarpa]                             |
| 2975 | 29978 | gi 224065328 | 41.02 | 5  | 1 | 1 |                      | 21889  | hypothetical protein POPTR_0002s24210g [Populus trichocarpa]                                  |
| 2745 | 29462 | gi 225435323 | 41.01 | 2  | 1 | 1 | Carbamidomethylation | 68176  | PREDICTED: protein SAND [Vitis vinifera]                                                      |
| 3707 | 19595 | gi 566192632 | 40.9  | 3  | 1 | 1 |                      | 35033  | nodulin 35 family protein [Populus trichocarpa]                                               |
| 2518 | 1478  | gi 225460855 | 40.88 | 2  | 1 | 1 | Carbamidomethylation | 61200  | PREDICTED: trigger factor-like protein TIG Chloroplastic [Vitis vinifera]                     |



|      |       |              |       |    |   |   |                      |       |                                                                                  |
|------|-------|--------------|-------|----|---|---|----------------------|-------|----------------------------------------------------------------------------------|
| 2952 | 1778  | gi 731427762 | 40.83 | 1  | 1 | 1 |                      | 78808 | PREDICTED: prolyl endopeptidase isoform X2 [Vitis vinifera]                      |
| 3538 | 19343 | gi 224115158 | 40.75 | 8  | 1 | 1 |                      | 16558 | RNA-binding family protein [Populus trichocarpa]                                 |
| 3705 | 19463 | gi 566214148 | 40.72 | 3  | 1 | 1 |                      | 45872 | hypothetical protein POPTR_0018s04060g [Populus trichocarpa]                     |
| 2973 | 18956 | gi 566162026 | 40.7  | 6  | 1 | 1 | Carbamidomethylation | 27183 | hypothetical protein POPTR_0003s10720g [Populus trichocarpa]                     |
| 2460 | 18638 | gi 224093896 | 40.66 | 3  | 1 | 1 |                      | 27844 | hypothetical protein POPTR_0007s06770g [Populus trichocarpa]                     |
| 2827 | 2014  | gi 225446046 | 40.64 | 3  | 1 | 1 |                      | 42983 | PREDICTED: afadin- and alpha-actinin-binding protein isoform X2 [Vitis vinifera] |
| 3534 | 29621 | gi 225436041 | 40.63 | 4  | 1 | 1 |                      | 36603 | PREDICTED: uncharacterized protein LOC100241087 [Vitis vinifera]                 |
| 2020 | 2500  | gi 526117641 | 40.6  | 4  | 1 | 1 |                      | 21825 | type II peroxiredoxin F [Vitis vinifera]                                         |
| 3548 | 29674 | gi 731425417 | 40.5  | 3  | 1 | 1 |                      | 27200 | PREDICTED: glycine-rich RNA-binding protein blt801 [Vitis vinifera]              |
| 1140 | 20079 | gi 566163874 | 40.47 | 2  | 1 | 1 |                      | 47484 | hypothetical protein POPTR_0003s21170g [Populus trichocarpa]                     |
| 2110 | 19364 | gi 566164258 | 40.42 | 2  | 1 | 1 |                      | 59785 | hypothetical protein POPTR_0004s00900g [Populus trichocarpa]                     |
| 2774 | 5994  | gi 731375872 | 40.41 | 2  | 1 | 1 |                      | 73729 | PREDICTED: signal recognition particle subunit SRP72 [Vitis vinifera]            |
| 3271 | 2239  | gi 731386510 | 40.36 | 3  | 1 | 1 |                      | 41384 | PREDICTED: protein DJ-1 homolog D [Vitis vinifera]                               |
| 2168 | 29470 | gi 225456991 | 40.33 | 10 | 1 | 1 |                      | 13364 | PREDICTED: glutaredoxin [Vitis vinifera]                                         |
| 1872 | 20302 | gi 566170882 | 40.32 | 8  | 2 | 2 |                      | 21960 | HISTONE H1-3 family protein [Populus trichocarpa]                                |

|      |       |              |       |    |   |   |                      |        |                                                                                                               |
|------|-------|--------------|-------|----|---|---|----------------------|--------|---------------------------------------------------------------------------------------------------------------|
| 2698 | 29178 | gi 224076226 | 40.26 | 9  | 2 | 2 |                      | 37465  | Peroxidase 42 precursor family protein [Populus trichocarpa]                                                  |
| 2871 | 25302 | gi 224093876 | 40.25 | 7  | 2 | 2 |                      | 41205  | GTP-binding family protein [Populus trichocarpa]                                                              |
| 2892 | 29705 | gi 225430808 | 40.18 | 4  | 1 | 1 |                      | 40179  | PREDICTED: splicing factor 3B subunit 4 [Vitis vinifera]                                                      |
| 2821 | 20252 | gi 566215395 | 40.17 | 5  | 1 | 1 |                      | 21500  | hypothetical protein POPTR_0018s11910g [Populus trichocarpa]                                                  |
| 3530 | 29576 | gi 566155359 | 40.16 | 1  | 1 | 1 |                      | 149105 | VARICOSE family protein [Populus trichocarpa]                                                                 |
| 3549 | 29685 | gi 731428902 | 40.11 | 1  | 1 | 1 |                      | 116462 | PREDICTED: pre-mRNA-processing protein 40A [Vitis vinifera]                                                   |
| 2285 | 29551 | gi 225458850 | 40.01 | 4  | 1 | 1 |                      | 21998  | PREDICTED: LIM domain-containing protein WLIM1 [Vitis vinifera]                                               |
| 3708 | 29982 | gi 225456479 | 40    | 2  | 1 | 1 |                      | 67613  | PREDICTED: signal recognition particle subunit SRP68 [Vitis vinifera]                                         |
| 2618 | 29975 | gi 225432652 | 39.86 | 4  | 1 | 1 | Carbamidomethylation | 33077  | PREDICTED: uncharacterized protein LOC100242666 [Vitis vinifera]                                              |
| 3533 | 29611 | gi 731438931 | 39.84 | 3  | 1 | 1 |                      | 51437  | PREDICTED: alpha-1 3-mannosyl-glycoprotein 2-beta-N-acetylglucosaminyltransferase isoform X2 [Vitis vinifera] |
| 2174 | 19858 | gi 566194536 | 39.73 | 4  | 1 | 1 |                      | 28624  | hypothetical protein POPTR_0011s09130g [Populus trichocarpa]                                                  |
| 3542 | 29649 | gi 225457574 | 39.63 | 5  | 1 | 1 |                      | 31304  | PREDICTED: WUSCHEL-related homeobox 8 [Vitis vinifera]                                                        |
| 2601 | 29484 | gi 225446724 | 39.61 | 3  | 1 | 1 | Carbamidomethylation | 58127  | PREDICTED: glutamyl-tRNA(Gln) amidotransferase subunit A chloroplastic/mitochondrial [Vitis vinifera]         |
| 2890 | 19399 | gi 224130486 | 39.6  | 13 | 1 | 1 |                      | 9171   | hypothetical protein POPTR_0014s09080g [Populus trichocarpa]                                                  |

|      |       |              |       |    |   |   |                      |       |                                                                                                |
|------|-------|--------------|-------|----|---|---|----------------------|-------|------------------------------------------------------------------------------------------------|
| 2784 | 29715 | gi 224107511 | 39.54 | 4  | 1 | 1 |                      | 30527 | RNA-binding protein RNP1 precursor [Populus trichocarpa]                                       |
| 3706 | 29968 | gi 566202901 | 39.51 | 3  | 1 | 1 | Carbamidomethylation | 44101 | methionine aminopeptidase 1 family protein [Populus trichocarpa]                               |
| 2976 | 29983 | gi 566183679 | 39.49 | 2  | 1 | 1 |                      | 49185 | serine carboxypeptidase S10 family protein [Populus trichocarpa]                               |
| 2977 | 18864 | gi 731383454 | 39.27 | 4  | 1 | 1 |                      | 43734 | PREDICTED: probable N-acetyl-gamma-glutamyl-phosphate reductase chloroplastic [Vitis vinifera] |
| 2379 | 2858  | gi 731411254 | 39.26 | 5  | 1 | 1 |                      | 21305 | PREDICTED: 22.0 kDa class IV heat shock protein-like [Vitis vinifera]                          |
| 3547 | 2876  | gi 731430482 | 39.15 | 3  | 1 | 1 | Carbamidomethylation | 41987 | PREDICTED: angio-associated migratory cell protein [Vitis vinifera]                            |
| 3175 | 29460 | gi 224137970 | 39.11 | 4  | 1 | 1 | Carbamidomethylation | 33648 | DNAJ heat shock N-terminal domain-containing family protein [Populus trichocarpa]              |
| 899  | 20075 | gi 224092174 | 39.11 | 4  | 1 | 1 |                      | 36141 | hypothetical protein POPTR_0006s24360g [Populus trichocarpa]                                   |
| 2195 | 1665  | gi 225459083 | 39.06 | 2  | 1 | 1 |                      | 58401 | PREDICTED: argininosuccinate lyase chloroplastic [Vitis vinifera]                              |
| 2889 | 29680 | gi 566184371 | 38.93 | 2  | 1 | 1 |                      | 45333 | hypothetical protein POPTR_0008s16710g [Populus trichocarpa]                                   |
| 3709 | 5408  | gi 225426544 | 38.93 | 13 | 1 | 1 |                      | 11408 | PREDICTED: 60S acidic ribosomal protein P1 [Vitis vinifera]                                    |
| 1991 | 2790  | gi 225455278 | 38.8  | 18 | 1 | 1 | Oxidation (M)        | 15102 | PREDICTED: cytochrome b5 isoform E [Vitis vinifera]                                            |
| 2111 | 2574  | gi 225434245 | 38.79 | 3  | 1 | 1 |                      | 38123 | PREDICTED: 4-hydroxy-tetrahydrodipicolinate reductase 1 chloroplastic [Vitis vinifera]         |
| 2978 | 19943 | gi 566210850 | 38.77 | 3  | 1 | 1 |                      | 41273 | hypothetical protein POPTR_0017s02230g [Populus trichocarpa]                                   |
| 2450 | 29305 | gi 566167023 | 38.71 | 2  | 1 | 1 |                      | 50772 | hypothetical protein POPTR_0004s17420g [Populus trichocarpa]                                   |

|      |       |              |       |   |   |   |                      |        |                                                                                   |
|------|-------|--------------|-------|---|---|---|----------------------|--------|-----------------------------------------------------------------------------------|
| 2606 | 29567 | gi 225448511 | 38.55 | 2 | 1 | 1 |                      | 59202  | PREDICTED: sorting and assembly machinery component 50 homolog B [Vitis vinifera] |
| 2619 | 30004 | gi 566173253 | 38.51 | 2 | 1 | 1 |                      | 57186  | hypothetical protein POPTR_0005s25730g [Populus trichocarpa]                      |
| 3544 | 29659 | gi 224066789 | 38.44 | 2 | 1 | 1 | Carbamidomethylation | 57660  | hypothetical protein POPTR_0002s07790g [Populus trichocarpa]                      |
| 2573 | 30006 | gi 225436773 | 38.42 | 4 | 1 | 1 |                      | 36439  | PREDICTED: OTU domain-containing protein 6B [Vitis vinifera]                      |
| 3434 | 29504 | gi 566174766 | 38.4  | 3 | 1 | 1 | Carbamidomethylation | 52170  | hypothetical protein POPTR_0006s06160g [Populus trichocarpa]                      |
| 3443 | 18831 | gi 224126789 | 38.4  | 2 | 1 | 1 |                      | 65325  | pyridine nucleotide-disulfide oxidoreductase family protein [Populus trichocarpa] |
| 2107 | 1676  | gi 225428560 | 38.35 | 2 | 2 | 1 |                      | 83942  | PREDICTED: phospholipase A-2-activating protein isoform X3 [Vitis vinifera]       |
| 763  | 3445  | gi 731406152 | 38.33 | 1 | 1 | 1 |                      | 209109 | PREDICTED: dedicator of cytokinesis protein 8 isoform X3 [Vitis vinifera]         |
| 2777 | 2388  | gi 731424368 | 38.32 | 2 | 1 | 1 |                      | 72886  | PREDICTED: pentatricopeptide repeat-containing protein At3g49240 [Vitis vinifera] |
| 3712 | 19906 | gi 225459530 | 38.21 | 2 | 1 | 1 |                      | 55804  | PREDICTED: glutamic acid-rich protein [Vitis vinifera]                            |
| 2021 | 19995 | gi 566208495 | 38.17 | 1 | 1 | 1 |                      | 80383  | DNA topoisomerase 2 family protein [Populus trichocarpa]                          |
| 2979 | 19908 | gi 731409599 | 38.14 | 3 | 1 | 1 |                      | 39025  | PREDICTED: GDSL esterase/lipase At4g26790-like [Vitis vinifera]                   |
| 3713 | 2602  | gi 225424272 | 38.1  | 7 | 1 | 1 |                      | 17200  | PREDICTED: MLP-like protein 34 [Vitis vinifera]                                   |
| 3710 | 19794 | gi 224073306 | 38.03 | 2 | 1 | 1 |                      | 50609  | hypothetical protein POPTR_0003s01420g [Populus trichocarpa]                      |
| 2176 | 2512  | gi 359491781 | 37.95 | 6 | 1 | 1 |                      | 18046  | PREDICTED: miraculin-like partial [Vitis vinifera]                                |

|      |       |              |       |    |   |   |                      |        |                                                                                 |
|------|-------|--------------|-------|----|---|---|----------------------|--------|---------------------------------------------------------------------------------|
| 3714 | 30011 | gi 225435429 | 37.94 | 4  | 1 | 1 |                      | 42775  | PREDICTED: uncharacterized protein LOC100267343 [Vitis vinifera]                |
| 3711 | 2413  | gi 359475077 | 37.92 | 2  | 1 | 1 | Carbamidomethylation | 75336  | PREDICTED: tRNA-dihydrouridine(47) synthase [NAD(P)(+)-like [Vitis vinifera]    |
| 2175 | 2796  | gi 225450236 | 37.8  | 9  | 1 | 1 |                      | 12047  | PREDICTED: 40S ribosomal protein S25 [Vitis vinifera]                           |
| 2336 | 29701 | gi 225464531 | 37.79 | 2  | 1 | 1 |                      | 49751  | PREDICTED: BAHD acyltransferase DCR [Vitis vinifera]                            |
| 3423 | 20023 | gi 566205509 | 37.78 | 3  | 1 | 1 |                      | 39789  | hypothetical protein POPTR_0015s02150g [Populus trichocarpa]                    |
| 3265 | 29414 | gi 225436347 | 37.77 | 2  | 1 | 1 |                      | 99445  | PREDICTED: uncharacterized protein LOC100261914 [Vitis vinifera]                |
| 2523 | 20467 | gi 566166948 | 37.74 | 1  | 1 | 1 |                      | 116430 | hypothetical protein POPTR_0004s16940g [Populus trichocarpa]                    |
| 3543 | 29657 | gi 566176657 | 37.74 | 3  | 1 | 1 | Carbamidomethylation | 47264  | hypothetical protein POPTR_0006s16050g [Populus trichocarpa]                    |
| 2022 | 2600  | gi 526117629 | 37.74 | 8  | 1 | 1 | Carbamidomethylation | 11686  | lipid transfer protein precursor [Vitis vinifera]                               |
| 3539 | 29642 | gi 566211614 | 37.64 | 2  | 1 | 1 |                      | 64182  | asparaginyl-tRNA synthetase family protein [Populus trichocarpa]                |
| 2556 | 2718  | gi 731395801 | 37.61 | 10 | 2 | 2 |                      | 21364  | PREDICTED: nitrogen regulatory protein P-II homolog isoform X2 [Vitis vinifera] |
| 3715 | 30021 | gi 566168047 | 37.59 | 2  | 1 | 1 |                      | 56955  | serine carboxypeptidase family protein [Populus trichocarpa]                    |
| 1989 | 20639 | gi 224073090 | 37.47 | 1  | 1 | 1 |                      | 72063  | Histone-lysine N-methyltransferase family protein [Populus trichocarpa]         |
| 2896 | 19915 | gi 566166166 | 37.41 | 4  | 1 | 1 | Carbamidomethylation | 26598  | hypothetical protein POPTR_0004s11800g [Populus trichocarpa]                    |
| 2361 | 19077 | gi 566200735 | 37.29 | 5  | 2 | 1 |                      | 47505  | hypothetical protein POPTR_0013s11650g [Populus trichocarpa]                    |

|      |       |              |       |    |   |   |                      |       |                                                                                          |
|------|-------|--------------|-------|----|---|---|----------------------|-------|------------------------------------------------------------------------------------------|
| 3331 | 2192  | gi 731436255 | 37.26 | 3  | 1 | 1 |                      | 72082 | PREDICTED: LOW QUALITY PROTEIN: polyadenylate-binding protein 3 partial [Vitis vinifera] |
| 3429 | 1750  | gi 225447488 | 37.26 | 2  | 1 | 1 |                      | 63568 | PREDICTED: uncharacterized protein LOC100266500 [Vitis vinifera]                         |
| 2563 | 29664 | gi 566187835 | 37.25 | 3  | 1 | 1 |                      | 45220 | hypothetical protein POPTR_0009s13600g [Populus trichocarpa]                             |
| 3559 | 29733 | gi 224142329 | 37.25 | 4  | 1 | 1 |                      | 30751 | tetratricopeptide repeat-containing family protein [Populus trichocarpa]                 |
| 2832 | 29594 | gi 224082148 | 37.12 | 4  | 1 | 1 |                      | 43446 | hypothetical protein POPTR_0005s16700g [Populus trichocarpa]                             |
| 2620 | 2524  | gi 225452110 | 37.11 | 10 | 1 | 1 | Carbamidomethylation | 9858  | PREDICTED: non-specific lipid-transfer protein 2-like [Vitis vinifera]                   |
| 3556 | 2466  | gi 225429195 | 37.1  | 2  | 1 | 1 |                      | 63400 | PREDICTED: probable zinc metallopeptidase EGY3 chloroplastic [Vitis vinifera]            |
| 2837 | 25594 | gi 224086851 | 37.07 | 6  | 1 | 1 |                      | 27383 | tubulin folding cofactor B family protein [Populus trichocarpa]                          |
| 2772 | 29357 | gi 225431489 | 37.03 | 2  | 1 | 1 |                      | 95225 | PREDICTED: ATP-dependent zinc metalloprotease FtsH [Vitis vinifera]                      |
| 2835 | 1711  | gi 225466119 | 37.01 | 3  | 1 | 1 |                      | 42250 | PREDICTED: luc7-like protein 3 [Vitis vinifera]                                          |
| 3553 | 29707 | gi 731393379 | 36.96 | 4  | 1 | 1 |                      | 28946 | PREDICTED: factor of DNA methylation 4-like [Vitis vinifera]                             |
| 2574 | 30033 | gi 224122560 | 36.94 | 12 | 1 | 1 | Carbamidomethylation | 11604 | hypothetical protein POPTR_0012s14230g [Populus trichocarpa]                             |
| 2462 | 19525 | gi 566170977 | 36.89 | 3  | 1 | 1 |                      | 29462 | hypothetical protein POPTR_0005s12280g [Populus trichocarpa]                             |
| 3552 | 29702 | gi 224090669 | 36.8  | 2  | 1 | 1 |                      | 50892 | PDE1 SUPPRESSOR 1 family protein [Populus trichocarpa]                                   |
| 1754 | 1964  | gi 731433023 | 36.73 | 6  | 2 | 1 | Carbamidomethylation | 39210 | PREDICTED: GDSL esterase/lipase At4g26790 [Vitis vinifera]                               |
| 2981 | 30031 | gi 731396740 | 36.69 | 4  | 1 | 1 |                      | 35076 | PREDICTED: nuclear pore complex protein NUP58-like [Vitis vinifera]                      |

|      |       |              |       |    |   |   |                      |        |                                                                                                 |
|------|-------|--------------|-------|----|---|---|----------------------|--------|-------------------------------------------------------------------------------------------------|
| 2517 | 29392 | gi 566182169 | 36.63 | 1  | 1 | 1 | Carbamidomethylation | 117003 | exocyst complex component Sec8 family protein [Populus trichocarpa]                             |
| 2775 | 29443 | gi 224144994 | 36.62 | 2  | 1 | 1 |                      | 46883  | hypothetical protein POPTR_0019s08680g [Populus trichocarpa]                                    |
| 3557 | 20213 | gi 224114830 | 36.58 | 2  | 1 | 1 |                      | 47731  | putative 4-methyl-5(b-hydroxyethyl)-thiazole monophosphate family protein [Populus trichocarpa] |
| 2380 | 1383  | gi 359476759 | 36.47 | 3  | 1 | 1 |                      | 47072  | PREDICTED: basic leucine zipper and W2 domain-containing protein 2 [Vitis vinifera]             |
| 3719 | 30058 | gi 566156450 | 36.3  | 3  | 1 | 1 |                      | 48749  | 4-HYDROXYPHENYLPYRUVATE DIOXYGENASE family protein [Populus trichocarpa]                        |
| 3716 | 19969 | gi 225469438 | 36.03 | 6  | 1 | 1 |                      | 17534  | PREDICTED: pollen-specific protein C13 [Vitis vinifera]                                         |
| 2327 | 3386  | gi 731395454 | 36.01 | 7  | 2 | 1 |                      | 19689  | PREDICTED: uncharacterized protein OsI_027940 isoform X2 [Vitis vinifera]                       |
| 2143 | 20265 | gi 731387184 | 36    | 2  | 1 | 1 |                      | 61791  | PREDICTED: U1 small nuclear ribonucleoprotein 70 kDa [Vitis vinifera]                           |
| 2108 | 19106 | gi 224078826 | 35.92 | 4  | 1 | 1 |                      | 24905  | Oxygen-evolving enhancer protein 3-1 [Populus trichocarpa]                                      |
| 2621 | 20096 | gi 224123444 | 35.92 | 10 | 1 | 1 |                      | 14627  | prefoldin family protein [Populus trichocarpa]                                                  |
| 2982 | 30038 | gi 566161658 | 35.92 | 6  | 1 | 1 |                      | 21323  | hypothetical protein POPTR_0003s08810g partial [Populus trichocarpa]                            |
| 2980 | 30029 | gi 224061849 | 35.89 | 2  | 1 | 1 |                      | 79175  | hypothetical protein POPTR_0002s00760g [Populus trichocarpa]                                    |
| 3718 | 4681  | gi 731397495 | 35.88 | 2  | 1 | 1 |                      | 70457  | PREDICTED: RNA-binding protein 39 [Vitis vinifera]                                              |
| 3541 | 29647 | gi 225442841 | 35.85 | 5  | 1 | 1 |                      | 18913  | PREDICTED: monothiol glutaredoxin-S15 mitochondrial [Vitis vinifera]                            |

|      |       |              |       |   |   |   |                      |        |                                                                                                                  |
|------|-------|--------------|-------|---|---|---|----------------------|--------|------------------------------------------------------------------------------------------------------------------|
| 3426 | 19838 | gi 731395888 | 35.82 | 3 | 1 | 1 |                      | 44982  | PREDICTED: protein notum homolog [Vitis vinifera]                                                                |
| 2722 | 2135  | gi 731379048 | 35.7  | 1 | 1 | 1 |                      | 106833 | PREDICTED: nuclear pore complex protein NUP98A [Vitis vinifera]                                                  |
| 2905 | 24288 | gi 224092582 | 35.65 | 9 | 1 | 1 |                      | 24079  | Stromal cell-derived factor 2-like protein precursor [Populus trichocarpa]                                       |
| 3717 | 19808 | gi 566160273 | 35.6  | 6 | 1 | 1 | Carbamidomethylation | 17554  | hypothetical protein POPTR_0003s01440g [Populus trichocarpa]                                                     |
| 3720 | 30060 | gi 225470348 | 35.46 | 3 | 1 | 1 |                      | 49168  | PREDICTED: trafficking protein particle complex subunit 13 [Vitis vinifera]                                      |
| 2907 | 30269 | gi 225430161 | 35.38 | 6 | 1 | 1 |                      | 18409  | PREDICTED: N-alpha-acetyltransferase 50 [Vitis vinifera]                                                         |
| 3721 | 30065 | gi 731383801 | 35.34 | 3 | 1 | 1 |                      | 35361  | PREDICTED: DNA-directed RNA polymerases II IV and V subunit 3 [Vitis vinifera]                                   |
| 2329 | 18960 | gi 566255736 | 35.32 | 5 | 1 | 1 |                      | 15873  | hypothetical protein POPTR_0483s00200g partial [Populus trichocarpa]                                             |
| 2984 | 19460 | gi 566146659 | 35.31 | 3 | 1 | 1 |                      | 54423  | hypothetical protein POPTR_0001s01790g [Populus trichocarpa]                                                     |
| 3532 | 2477  | gi 731383208 | 35.26 | 4 | 1 | 1 |                      | 29098  | PREDICTED: heterodimeric geranylgeranyl pyrophosphate synthase small subunit chloroplastic-like [Vitis vinifera] |
| 2624 | 30094 | gi 224132038 | 35.25 | 2 | 1 | 1 |                      | 55654  | serine carboxypeptidase S10 family protein [Populus trichocarpa]                                                 |
| 2985 | 30069 | gi 225446523 | 35.17 | 8 | 1 | 1 | Carbamidomethylation | 40179  | PREDICTED: zingipain-2 [Vitis vinifera]                                                                          |
| 3327 | 6818  | gi 359475014 | 35.17 | 1 | 1 | 1 |                      | 69107  | PREDICTED: RNA-binding protein 39 [Vitis vinifera]                                                               |
| 3724 | 30077 | gi 566214618 | 35    | 7 | 1 | 1 | Carbamidomethylation | 13633  | hypothetical protein POPTR_0018s06830g [Populus trichocarpa]                                                     |
| 1328 | 2027  | gi 225428747 | 34.95 | 3 | 1 | 1 |                      | 33152  | PREDICTED: 2-hydroxyisoflavanone dehydratase [Vitis vinifera]                                                    |



|      |       |              |       |   |   |   |                      |        |                                                                                    |
|------|-------|--------------|-------|---|---|---|----------------------|--------|------------------------------------------------------------------------------------|
| 2983 | 30043 | gi 566206612 | 34.92 | 6 | 1 | 1 |                      | 18239  | hypothetical protein POPTR_0015s08470g [Populus trichocarpa]                       |
| 2147 | 30450 | gi 566257178 | 34.9  | 2 | 1 | 1 | Oxidation (M)        | 58755  | hypothetical protein POPTR_0177s00210g [Populus trichocarpa]                       |
| 3329 | 29468 | gi 225462062 | 34.88 | 1 | 1 | 1 |                      | 151429 | PREDICTED: enhancer of mRNA-decapping protein 4 [Vitis vinifera]                   |
| 2829 | 20188 | gi 566204034 | 34.88 | 2 | 1 | 1 |                      | 54966  | hypothetical protein POPTR_0014s13020g [Populus trichocarpa]                       |
| 3431 | 29500 | gi 224062736 | 34.84 | 4 | 1 | 1 |                      | 36694  | ribose-phosphate pyrophosphokinase 4 family protein [Populus trichocarpa]          |
| 3727 | 19336 | gi 225444159 | 34.83 | 5 | 1 | 1 |                      | 32002  | PREDICTED: coatomer subunit epsilon-1 [Vitis vinifera]                             |
| 3729 | 2420  | gi 225447221 | 34.82 | 6 | 1 | 1 |                      | 18627  | PREDICTED: photosystem II repair protein PSB27-H1 chloroplastical [Vitis vinifera] |
| 2986 | 2692  | gi 359479028 | 34.81 | 3 | 1 | 1 |                      | 40721  | PREDICTED: probable trans-2-enoyl-CoA reductase mitochondrial [Vitis vinifera]     |
| 2622 | 19941 | gi 566186111 | 34.72 | 8 | 1 | 1 |                      | 12191  | hypothetical protein POPTR_0009s03520g partial [Populus trichocarpa]               |
| 3725 | 20605 | gi 225467859 | 34.66 | 3 | 1 | 1 | Carbamidomethylation | 33928  | PREDICTED: chlorophyllase-1 [Vitis vinifera]                                       |
| 3726 | 30081 | gi 225451663 | 34.63 | 4 | 1 | 1 |                      | 29408  | PREDICTED: syntaxin-22 [Vitis vinifera]                                            |
| 2169 | 20531 | gi 225442133 | 34.61 | 7 | 2 | 1 |                      | 22029  | PREDICTED: auxin-binding protein ABP19a [Vitis vinifera]                           |
| 3728 | 19955 | gi 225445842 | 34.59 | 6 | 1 | 1 |                      | 21531  | PREDICTED: uncharacterized protein LOC100243229 [Vitis vinifera]                   |
| 2987 | 30087 | gi 566169425 | 34.55 | 2 | 1 | 1 |                      | 65228  | hypothetical protein POPTR_0005s04420g [Populus trichocarpa]                       |
| 3558 | 19573 | gi 566187444 | 34.53 | 2 | 1 | 1 |                      | 54252  | allene oxide synthase family protein [Populus trichocarpa]                         |

|      |       |              |       |    |   |   |                      |        |                                                                                      |
|------|-------|--------------|-------|----|---|---|----------------------|--------|--------------------------------------------------------------------------------------|
| 3528 | 29561 | gi 566209115 | 34.52 | 4  | 1 | 1 | Carbamidomethylation | 35581  | tatD-related deoxyribonuclease family protein [Populus trichocarpa]                  |
| 3730 | 20379 | gi 566195508 | 34.48 | 2  | 1 | 1 |                      | 46302  | arginine/serine-rich family protein [Populus trichocarpa]                            |
| 2623 | 30083 | gi 566255151 | 34.39 | 6  | 1 | 1 |                      | 20944  | hypothetical protein POPTR_0661s00200g [Populus trichocarpa]                         |
| 3325 | 29441 | gi 566177781 | 34.31 | 3  | 1 | 1 |                      | 47632  | hypothetical protein POPTR_0006s23550g [Populus trichocarpa]                         |
| 2491 | 18988 | gi 224072767 | 34.28 | 4  | 1 | 1 |                      | 29070  | hypothetical protein POPTR_0003s18420g [Populus trichocarpa]                         |
| 3731 | 19369 | gi 224067716 | 34.1  | 11 | 1 | 1 | Carbamidomethylation | 13535  | hypothetical protein POPTR_0002s14760g [Populus trichocarpa]                         |
| 3560 | 29743 | gi 566155545 | 34.09 | 4  | 1 | 1 | Carbamidomethylation | 38236  | hypothetical protein POPTR_0002s00650g [Populus trichocarpa]                         |
| 2989 | 30099 | gi 731386598 | 34.07 | 2  | 1 | 1 |                      | 40869  | PREDICTED: GDSL esterase/lipase At5g33370 [Vitis vinifera]                           |
| 3218 | 29644 | gi 566209274 | 34.02 | 1  | 1 | 1 |                      | 66062  | hypothetical protein POPTR_0016s07950g [Populus trichocarpa]                         |
| 2237 | 4252  | gi 359488906 | 34.01 | 2  | 2 | 2 | Oxidation (M)        | 135812 | PREDICTED: ABC transporter B family member 19 [Vitis vinifera]                       |
| 3723 | 30070 | gi 225443988 | 34.01 | 7  | 1 | 1 |                      | 13228  | PREDICTED: photosystem I reaction center subunit psaK chloroplastic [Vitis vinifera] |
| 3722 | 19986 | gi 224117028 | 33.9  | 8  | 1 | 1 |                      | 15358  | hypothetical protein POPTR_0011s11080g [Populus trichocarpa]                         |
| 2895 | 29723 | gi 224114964 | 33.87 | 5  | 1 | 1 |                      | 34813  | hypothetical protein POPTR_0011s12160g [Populus trichocarpa]                         |
| 2988 | 19544 | gi 566164408 | 33.83 | 2  | 1 | 1 |                      | 45443  | RNA-binding protein 45 [Populus trichocarpa]                                         |
| 3732 | 30120 | gi 731428892 | 33.76 | 10 | 1 | 1 |                      | 15960  | PREDICTED: uncharacterized protein LOC100259164 isoform X2 [Vitis vinifera]          |

|      |       |              |       |   |   |   |                      |       |                                                                                                |
|------|-------|--------------|-------|---|---|---|----------------------|-------|------------------------------------------------------------------------------------------------|
| 2451 | 6489  | gi 225432798 | 33.7  | 3 | 1 | 1 |                      | 38396 | PREDICTED: perakine reductase [Vitis vinifera]                                                 |
| 2994 | 30176 | gi 731396112 | 33.7  | 3 | 1 | 1 |                      | 55464 | PREDICTED: glutathione gamma-glutamylcysteinyltransferase 1 [Vitis vinifera]                   |
| 2900 | 2793  | gi 731369035 | 33.63 | 4 | 1 | 1 |                      | 29422 | PREDICTED: anthranilate synthase beta subunit 1 chloroplastic-like isoform X2 [Vitis vinifera] |
| 3561 | 21049 | gi 566164165 | 33.53 | 3 | 1 | 1 |                      | 36059 | chromoplast-specific carotenoid-associated protein CHRC [Populus trichocarpa]                  |
| 2990 | 30127 | gi 359479048 | 33.4  | 7 | 1 | 1 |                      | 17061 | PREDICTED: protein disulfide isomerase-like 5-1 [Vitis vinifera]                               |
| 2559 | 29541 | gi 224053282 | 33.22 | 2 | 1 | 1 |                      | 51942 | Uridine 5'-monophosphate synthase family protein [Populus trichocarpa]                         |
| 2142 | 29648 | gi 359473178 | 33.07 | 4 | 1 | 1 |                      | 40072 | PREDICTED: 2-methylene-furan-3-one reductase [Vitis vinifera]                                  |
| 1560 | 2681  | gi 225455153 | 33.05 | 4 | 1 | 1 |                      | 26938 | PREDICTED: mitochondrial import inner membrane translocase subunit TIM22-like [Vitis vinifera] |
| 3540 | 29643 | gi 225434205 | 32.86 | 5 | 1 | 1 |                      | 20681 | PREDICTED: 60S ribosome subunit biogenesis protein NIP7 homolog [Vitis vinifera]               |
| 2572 | 20159 | gi 731382351 | 32.83 | 2 | 1 | 1 |                      | 43783 | PREDICTED: uncharacterized protein LOC100245856 [Vitis vinifera]                               |
| 3435 | 29510 | gi 566209622 | 32.82 | 1 | 1 | 1 |                      | 89923 | hypothetical protein POPTR_0016s10620g [Populus trichocarpa]                                   |
| 3438 | 29640 | gi 566202105 | 32.79 | 6 | 1 | 1 |                      | 23731 | hypothetical protein POPTR_0014s02820g [Populus trichocarpa]                                   |
| 2991 | 2748  | gi 526117331 | 32.54 | 7 | 1 | 1 |                      | 14247 | thioredoxin h [Vitis vinifera]                                                                 |
| 2522 | 19256 | gi 224072659 | 32.52 | 2 | 1 | 1 |                      | 53805 | glutathione-disulfide reductase family protein [Populus trichocarpa]                           |
| 2785 | 29749 | gi 566199841 | 32.43 | 2 | 1 | 1 |                      | 73415 | hypothetical protein POPTR_0013s06690g [Populus trichocarpa]                                   |
| 3036 | 19194 | gi 224102881 | 32.37 | 3 | 1 | 1 | Carbamidomethylation | 45777 | tRNA synthetase class 1 family protein [Populus trichocarpa]                                   |

|      |       |              |       |    |   |   |                      |       |                                                                                    |
|------|-------|--------------|-------|----|---|---|----------------------|-------|------------------------------------------------------------------------------------|
| 2992 | 30147 | gi 225434417 | 32.22 | 6  | 1 | 1 |                      | 26437 | PREDICTED: U2 small nuclear ribonucleoprotein B" 2 [Vitis vinifera]                |
| 3563 | 6909  | gi 225438579 | 32.02 | 3  | 1 | 1 |                      | 39381 | PREDICTED: uncharacterized protein LOC100247396 [Vitis vinifera]                   |
| 3176 | 2594  | gi 731382912 | 31.97 | 2  | 1 | 1 |                      | 81725 | PREDICTED: subtilisin-like protease [Vitis vinifera]                               |
| 2898 | 29748 | gi 566162341 | 31.93 | 3  | 1 | 1 |                      | 68078 | hypothetical protein POPTR_0003s12640g [Populus trichocarpa]                       |
| 2337 | 29778 | gi 224135649 | 31.87 | 3  | 1 | 1 |                      | 28394 | hypothetical protein POPTR_0015s07660g [Populus trichocarpa]                       |
| 2747 | 29683 | gi 566197448 | 31.85 | 9  | 1 | 1 | Carbamidomethylation | 12293 | hypothetical protein POPTR_0012s08450g [Populus trichocarpa]                       |
| 3267 | 29437 | gi 224095855 | 31.85 | 2  | 1 | 1 |                      | 76011 | hypothetical protein POPTR_0007s03550g [Populus trichocarpa]                       |
| 3562 | 29759 | gi 225439352 | 31.78 | 2  | 1 | 1 |                      | 50930 | PREDICTED: fasciclin-like arabinogalactan protein 17 [Vitis vinifera]              |
| 497  | 20523 | gi 224123460 | 31.58 | 4  | 1 | 1 |                      | 20643 | hypothetical protein POPTR_0013s04000g [Populus trichocarpa]                       |
| 3735 | 19979 | gi 566188099 | 31.39 | 12 | 1 | 1 |                      | 8182  | hypothetical protein POPTR_0009s15150g [Populus trichocarpa]                       |
| 3424 | 29432 | gi 731417542 | 31.34 | 4  | 1 | 1 |                      | 40609 | PREDICTED: pyridoxal kinase isoform X5 [Vitis vinifera]                            |
| 2569 | 29717 | gi 225465619 | 31.24 | 7  | 1 | 1 |                      | 26018 | PREDICTED: thioredoxin domain-containing protein PLP3A isoform X2 [Vitis vinifera] |
| 3733 | 19232 | gi 224077516 | 31.22 | 2  | 1 | 1 |                      | 59212 | 4-coumarate--CoA ligase family protein [Populus trichocarpa]                       |
| 3736 | 2759  | gi 225464240 | 31.02 | 5  | 1 | 1 |                      | 20829 | PREDICTED: uncharacterized protein At4g13200 chloroplastic [Vitis vinifera]        |

|      |       |              |       |   |   |   |                      |        |                                                                                       |
|------|-------|--------------|-------|---|---|---|----------------------|--------|---------------------------------------------------------------------------------------|
| 3734 | 30164 | gi 225448041 | 30.94 | 2 | 1 | 1 |                      | 57832  | PREDICTED: uncharacterized protein LOC100246257 [Vitis vinifera]                      |
| 3217 | 29368 | gi 224100723 | 30.93 | 1 | 1 | 1 |                      | 197122 | KOW domain-containing transcription factor family protein [Populus trichocarpa]       |
| 2899 | 20086 | gi 224096333 | 30.73 | 2 | 1 | 1 |                      | 57960  | hypothetical protein POPTR_0007s06670g [Populus trichocarpa]                          |
| 3566 | 29795 | gi 731423901 | 30.48 | 8 | 1 | 1 |                      | 16577  | PREDICTED: trafficking protein particle complex subunit 1 isoform X2 [Vitis vinifera] |
| 2626 | 2815  | gi 225445984 | 30.44 | 7 | 1 | 1 |                      | 15131  | PREDICTED: glutaredoxin-C4 [Vitis vinifera]                                           |
| 2993 | 2663  | gi 359490173 | 30.28 | 4 | 1 | 1 |                      | 25366  | PREDICTED: clp protease-related protein At4g12060 chloroplastic [Vitis vinifera]      |
| 3564 | 2261  | gi 359487708 | 30.24 | 3 | 1 | 1 |                      | 43172  | PREDICTED: flap endonuclease 1 isoform X2 [Vitis vinifera]                            |
| 3266 | 18995 | gi 566146741 | 30.09 | 2 | 1 | 1 |                      | 97119  | hypothetical protein POPTR_0001s02190g [Populus trichocarpa]                          |
| 2995 | 30224 | gi 566202657 | 30    | 4 | 1 | 1 |                      | 20954  | H <sup>+</sup> -transporting two-sector ATPase family protein [Populus trichocarpa]   |
| 2496 | 2682  | gi 225429325 | 29.94 | 5 | 1 | 1 |                      | 24120  | PREDICTED: thioredoxin domain-containing protein 9 homolog [Vitis vinifera]           |
| 3737 | 30174 | gi 224087965 | 29.88 | 4 | 1 | 1 | Carbamidomethylation | 35532  | hypothetical protein POPTR_0006s14820g [Populus trichocarpa]                          |
| 2897 | 2782  | gi 225459768 | 29.85 | 5 | 1 | 1 |                      | 17006  | PREDICTED: plastocyanin [Vitis vinifera]                                              |
| 3738 | 19616 | gi 566177300 | 29.75 | 3 | 1 | 1 |                      | 34068  | hypothetical protein POPTR_0006s20660g [Populus trichocarpa]                          |
| 2382 | 19376 | gi 566208632 | 29.73 | 4 | 1 | 1 |                      | 30390  | hypothetical protein POPTR_0016s04290g [Populus trichocarpa]                          |
| 3739 | 30189 | gi 225458599 | 29.51 | 3 | 1 | 1 | Carbamidomethylation | 30834  | PREDICTED: protein TIC 22 chloroplastic [Vitis vinifera]                              |

|      |       |              |       |    |   |   |                      |        |                                                                                                     |
|------|-------|--------------|-------|----|---|---|----------------------|--------|-----------------------------------------------------------------------------------------------------|
| 3568 | 30067 | gi 359478392 | 29.18 | 2  | 1 | 1 |                      | 73213  | PREDICTED: outer envelope protein 80 chloroplastic [Vitis vinifera]                                 |
| 3740 | 30230 | gi 225423716 | 29.17 | 3  | 1 | 1 |                      | 40852  | PREDICTED: glutathione S-transferase omega-like 2 [Vitis vinifera]                                  |
| 3270 | 23597 | gi 731420542 | 29.15 | 1  | 1 | 1 |                      | 210037 | PREDICTED: eukaryotic translation initiation factor 4G isoform X1 [Vitis vinifera]                  |
| 3565 | 29780 | gi 225454892 | 29.09 | 12 | 1 | 1 | Carbamidomethylation | 25916  | PREDICTED: polyadenylate-binding protein 2 [Vitis vinifera]                                         |
| 2748 | 29770 | gi 225438787 | 29.08 | 4  | 1 | 1 |                      | 36637  | PREDICTED: U1 small nuclear ribonucleoprotein A isoform X2 [Vitis vinifera]                         |
| 3430 | 18626 | gi 225454791 | 28.64 | 2  | 1 | 1 |                      | 70066  | PREDICTED: ATPase family AAA domain-containing protein 3-B [Vitis vinifera]                         |
| 3743 | 30257 | gi 225433514 | 28.51 | 3  | 1 | 1 |                      | 52339  | PREDICTED: selenium-binding protein 1 [Vitis vinifera]                                              |
| 3744 | 30266 | gi 731440611 | 28.36 | 6  | 1 | 1 | Carbamidomethylation | 32449  | PREDICTED: uncharacterized protein LOC100854177 [Vitis vinifera]                                    |
| 3554 | 29712 | gi 359482034 | 28.35 | 3  | 1 | 1 |                      | 29126  | PREDICTED: secoisolariciresinol dehydrogenase-like [Vitis vinifera]                                 |
| 2901 | 29794 | gi 731406441 | 28.32 | 3  | 1 | 1 |                      | 39154  | PREDICTED: mitogen-activated protein kinase kinase 2 [Vitis vinifera]                               |
| 3569 | 30116 | gi 566207206 | 28.09 | 3  | 1 | 1 |                      | 25482  | hypothetical protein POPTR_0015s12230g [Populus trichocarpa]                                        |
| 3742 | 30245 | gi 225452543 | 27.83 | 10 | 1 | 1 |                      | 13965  | PREDICTED: multifunctional methyltransferase subunit TRM112-like protein At1g22270 [Vitis vinifera] |
| 3741 | 2785  | gi 731408402 | 27.8  | 3  | 1 | 1 |                      | 29415  | PREDICTED: (DL)-glycerol-3-phosphatase 2 [Vitis vinifera]                                           |
| 2339 | 30263 | gi 224129620 | 27.44 | 5  | 1 | 1 |                      | 24277  | hypothetical protein POPTR_0014s18330g [Populus trichocarpa]                                        |

|      |       |              |       |    |   |   |                      |        |                                                                                           |
|------|-------|--------------|-------|----|---|---|----------------------|--------|-------------------------------------------------------------------------------------------|
| 2575 | 20266 | gi 224130034 | 27.39 | 2  | 1 | 1 |                      | 43250  | Fasciclin-like arabinogalactan protein 8 precursor [Populus trichocarpa]                  |
| 3031 | 29531 | gi 225433902 | 27.28 | 6  | 1 | 1 |                      | 19543  | PREDICTED: peptidyl-prolyl cis-trans isomerase E [Vitis vinifera]                         |
| 2261 | 29986 | gi 566171231 | 27.06 | 2  | 1 | 1 |                      | 50025  | hypothetical protein POPTR_0005s13910g [Populus trichocarpa]                              |
| 2452 | 29548 | gi 224099505 | 27.06 | 1  | 1 | 1 |                      | 62404  | hypothetical protein POPTR_0008s13110g [Populus trichocarpa]                              |
| 2996 | 30254 | gi 731392009 | 27.04 | 11 | 1 | 1 |                      | 9735   | PREDICTED: mitochondrial import inner membrane translocase subunit TIM10 [Vitis vinifera] |
| 3333 | 29557 | gi 566152952 | 26.97 | 2  | 1 | 1 |                      | 101224 | vesicle tethering family protein [Populus trichocarpa]                                    |
| 3745 | 20346 | gi 225435189 | 26.87 | 7  | 1 | 1 |                      | 14801  | PREDICTED: nuclear transcription factor Y subunit B-10-like [Vitis vinifera]              |
| 3570 | 30146 | gi 566197842 | 26.78 | 1  | 1 | 1 |                      | 59140  | hypothetical protein POPTR_0012s10800g [Populus trichocarpa]                              |
| 3572 | 18620 | gi 225468608 | 26.61 | 3  | 1 | 1 | Carbamidomethylation | 35710  | PREDICTED: peroxidase 66 [Vitis vinifera]                                                 |
| 3749 | 30342 | gi 225457225 | 26.53 | 14 | 1 | 1 | Carbamidomethylation | 21042  | PREDICTED: PLASMODESMATA CALLOSE-BINDING PROTEIN 3 [Vitis vinifera]                       |
| 3750 | 30343 | gi 566190046 | 26.51 | 2  | 1 | 1 |                      | 71866  | hypothetical protein POPTR_0010s10050g [Populus trichocarpa]                              |
| 2782 | 1915  | gi 225443496 | 26.34 | 1  | 1 | 1 |                      | 81071  | PREDICTED: DEAD-box ATP-dependent RNA helicase 21-like [Vitis vinifera]                   |
| 3334 | 29562 | gi 731393820 | 26.29 | 1  | 1 | 1 |                      | 99418  | PREDICTED: protein FAR1-RELATED SEQUENCE 3 isoform X2 [Vitis vinifera]                    |
| 3751 | 19028 | gi 566198361 | 26.27 | 1  | 1 | 1 |                      | 90791  | hypothetical protein POPTR_0012s13720g [Populus trichocarpa]                              |

|      |       |              |       |   |   |   |                      |        |                                                                                                     |
|------|-------|--------------|-------|---|---|---|----------------------|--------|-----------------------------------------------------------------------------------------------------|
| 3752 | 19612 | gi 566148044 | 26.16 | 3 | 1 | 1 | Carbamidomethylation | 28219  | glutathione S-transferase family protein [Populus trichocarpa]                                      |
| 2781 | 29572 | gi 566178826 | 26.02 | 2 | 1 | 1 |                      | 55940  | hypothetical protein POPTR_0006s29500g [Populus trichocarpa]                                        |
| 3746 | 30309 | gi 224088794 | 25.94 | 2 | 1 | 1 |                      | 64185  | conserved oligomeric Golgi complex component-related family protein [Populus trichocarpa]           |
| 3573 | 30301 | gi 566153219 | 25.74 | 1 | 1 | 1 |                      | 82405  | hypothetical protein POPTR_0001s37160g [Populus trichocarpa]                                        |
| 2998 | 30399 | gi 225423539 | 25.68 | 5 | 1 | 1 |                      | 14982  | PREDICTED: uncharacterized protein LOC100262861 [Vitis vinifera]                                    |
| 3342 | 30186 | gi 731389219 | 25.4  | 6 | 1 | 1 |                      | 16425  | PREDICTED: probable prefoldin subunit 2 [Vitis vinifera]                                            |
| 1878 | 30440 | gi 731404500 | 25.37 | 1 | 1 | 1 |                      | 113106 | PREDICTED: glycogen phosphorylase 1-like [Vitis vinifera]                                           |
| 3143 | 29570 | gi 566187799 | 25.32 | 1 | 1 | 1 |                      | 123734 | hypothetical protein POPTR_0009s13380g [Populus trichocarpa]                                        |
| 3747 | 30336 | gi 225456165 | 25.26 | 3 | 1 | 1 |                      | 38868  | PREDICTED: prostaglandin E synthase 2 [Vitis vinifera]                                              |
| 3336 | 2730  | gi 225439546 | 25.2  | 1 | 1 | 1 |                      | 91491  | PREDICTED: probably inactive leucine-rich repeat receptor-like protein kinase IMK2 [Vitis vinifera] |
| 3222 | 25258 | gi 224101571 | 24.77 | 1 | 1 | 1 |                      | 65688  | mRNA for putative aldehyde dehydrogenase family protein [Populus trichocarpa]                       |
| 2627 | 30394 | gi 731405738 | 24.69 | 1 | 1 | 1 |                      | 160488 | PREDICTED: probable disease resistance protein At4g27220 isoform X1 [Vitis vinifera]                |
| 2999 | 30567 | gi 731412337 | 24.63 | 3 | 1 | 1 |                      | 33241  | PREDICTED: RNA-binding protein Nova-2 isoform X3 [Vitis vinifera]                                   |
| 3575 | 30466 | gi 225427112 | 24.62 | 2 | 1 | 1 |                      | 40773  | PREDICTED: plastoglobulin-1 chloroplastic [Vitis vinifera]                                          |
| 2909 | 30480 | gi 566208493 | 24.48 | 2 | 1 | 1 | Carbamidomethylation | 69814  | hypothetical protein POPTR_0016s03540g [Populus trichocarpa]                                        |



|      |       |              |       |    |   |   |                      |        |                                                                             |
|------|-------|--------------|-------|----|---|---|----------------------|--------|-----------------------------------------------------------------------------|
| 2453 | 2813  | gi 225427973 | 24.43 | 3  | 1 | 1 |                      | 19853  | PREDICTED: glycine-rich protein 2-like [Vitis vinifera]                     |
| 3754 | 20129 | gi 224057220 | 24.38 | 4  | 1 | 1 |                      | 22345  | cysteine protease inhibitor family protein [Populus trichocarpa]            |
| 3755 | 7618  | gi 731413580 | 24.26 | 3  | 1 | 1 | Carbamidomethylation | 41817  | PREDICTED: uncharacterized protein LOC100256822 [Vitis vinifera]            |
| 3574 | 19644 | gi 225442791 | 24.26 | 2  | 1 | 1 |                      | 68124  | PREDICTED: plastidic ATP/ADP-transporter [Vitis vinifera]                   |
| 3343 | 6691  | gi 225437318 | 24    | 1  | 1 | 1 |                      | 157286 | PREDICTED: translocase of chloroplast 159 chloroplastic [Vitis vinifera]    |
| 3756 | 25467 | gi 225440807 | 23.98 | 8  | 1 | 1 |                      | 18280  | PREDICTED: peptidyl-prolyl cis-trans isomerase CYP18-2 [Vitis vinifera]     |
| 3577 | 30505 | gi 225447498 | 23.89 | 1  | 1 | 1 | Carbamidomethylation | 78851  | PREDICTED: long chain acyl-CoA synthetase 8 [Vitis vinifera]                |
| 3758 | 2988  | gi 731425525 | 23.87 | 1  | 1 | 1 |                      | 70478  | PREDICTED: uncharacterized protein LOC100260418 isoform X3 [Vitis vinifera] |
| 2794 | 23148 | gi 566200455 | 23.59 | 6  | 1 | 1 |                      | 23053  | hypothetical protein POPTR_0013s10250g [Populus trichocarpa]                |
| 3278 | 30335 | gi 566185108 | 23.59 | 4  | 1 | 1 |                      | 20300  | hypothetical protein POPTR_0008s20770g [Populus trichocarpa]                |
| 3759 | 30499 | gi 731423435 | 23.59 | 10 | 1 | 1 |                      | 17889  | PREDICTED: protein phosphatase inhibitor 2 isoform X3 [Vitis vinifera]      |
| 1722 | 30489 | gi 225458119 | 23.52 | 2  | 1 | 1 |                      | 41106  | PREDICTED: cysteine proteinase RD19a [Vitis vinifera]                       |
| 3762 | 30629 | gi 225451245 | 23.51 | 8  | 1 | 1 |                      | 20212  | PREDICTED: tRNA(adenine(34)) deaminase chloroplastic [Vitis vinifera]       |
| 2471 | 3251  | gi 359475474 | 23.47 | 2  | 1 | 1 |                      | 53125  | PREDICTED: serine carboxypeptidase-like 18 [Vitis vinifera]                 |

|      |       |              |       |    |   |   |                      |        |                                                                                                              |
|------|-------|--------------|-------|----|---|---|----------------------|--------|--------------------------------------------------------------------------------------------------------------|
| 2387 | 30601 | gi 731411898 | 23.4  | 3  | 1 | 1 |                      | 42756  | PREDICTED: aminoacyl tRNA synthase complex-interacting multifunctional protein 1 isoform X2 [Vitis vinifera] |
| 3580 | 30526 | gi 225458143 | 23.4  | 2  | 1 | 1 | Carbamidomethylation | 47431  | PREDICTED: zingipain-2 [Vitis vinifera]                                                                      |
| 3225 | 30407 | gi 224053991 | 23.38 | 1  | 1 | 1 |                      | 62720  | glucose-methanol-choline oxidoreductase family protein [Populus trichocarpa]                                 |
| 2630 | 30528 | gi 731368974 | 23.04 | 2  | 1 | 1 |                      | 52059  | PREDICTED: IAA-alanine resistance protein 1 [Vitis vinifera]                                                 |
| 3452 | 30647 | gi 566191598 | 22.98 | 4  | 1 | 1 |                      | 22740  | hypothetical protein POPTR_0010s19060g [Populus trichocarpa]                                                 |
| 2629 | 20108 | gi 566158274 | 22.89 | 3  | 1 | 1 |                      | 34050  | hypothetical protein POPTR_0002s15960g [Populus trichocarpa]                                                 |
| 3764 | 30652 | gi 225440692 | 22.72 | 2  | 1 | 1 |                      | 56466  | PREDICTED: LIMR family protein At5g01460 [Vitis vinifera]                                                    |
| 3582 | 21171 | gi 359475270 | 22.49 | 4  | 1 | 1 |                      | 20882  | PREDICTED: NEDD8-conjugating enzyme Ubc12 [Vitis vinifera]                                                   |
| 2341 | 5144  | gi 225431120 | 22.48 | 11 | 1 | 1 |                      | 23415  | PREDICTED: glycine-rich protein 2-like [Vitis vinifera]                                                      |
| 3090 | 23162 | gi 566166782 | 22.47 | 0  | 1 | 1 |                      | 223354 | phosphatidylinositol 4-kinase family protein [Populus trichocarpa]                                           |
| 2844 | 18812 | gi 671741947 | 22.39 | 11 | 1 | 1 |                      | 9397   | photosystem II cytochrome b559 alpha subunit (chloroplast) [Camellia grandibracteata]                        |
| 3767 | 21085 | gi 566187962 | 22.36 | 2  | 1 | 1 |                      | 33780  | Chain A family protein [Populus trichocarpa]                                                                 |
| 3768 | 30805 | gi 566188564 | 22.36 | 3  | 1 | 1 |                      | 29723  | hypothetical protein POPTR_0010s00930g [Populus trichocarpa]                                                 |
| 2912 | 30580 | gi 225451445 | 22.32 | 5  | 1 | 1 |                      | 22489  | PREDICTED: mitochondrial import receptor subunit TOM20 [Vitis vinifera]                                      |
| 3341 | 19011 | gi 566195960 | 22.2  | 1  | 1 | 1 |                      | 205867 | hypothetical protein POPTR_0011s17070g [Populus trichocarpa]                                                 |

|      |       |              |       |    |   |   |                      |        |                                                                                           |
|------|-------|--------------|-------|----|---|---|----------------------|--------|-------------------------------------------------------------------------------------------|
| 3761 | 2289  | gi 731384376 | 22.04 | 4  | 1 | 1 |                      | 35786  | PREDICTED: cinnamoyl-CoA reductase 1 [Vitis vinifera]                                     |
| 2242 | 30717 | gi 359491817 | 22.01 | 3  | 1 | 1 | Carbamidomethylation | 41965  | PREDICTED: uncharacterized protein At4g15970-like [Vitis vinifera]                        |
| 2749 | 30295 | gi 566205166 | 21.97 | 2  | 1 | 1 |                      | 139960 | hypothetical protein POPTR_0015s00250g [Populus trichocarpa]                              |
| 3578 | 21900 | gi 566180229 | 21.89 | 2  | 1 | 1 |                      | 71241  | hypothetical protein POPTR_0007s08250g [Populus trichocarpa]                              |
| 3590 | 3123  | gi 359473301 | 21.77 | 2  | 1 | 1 |                      | 55596  | PREDICTED: KH domain-containing protein At4g18375 isoform X2 [Vitis vinifera]             |
| 2529 | 30330 | gi 566167973 | 21.77 | 1  | 1 | 1 |                      | 105310 | hypothetical protein POPTR_0004s22170g [Populus trichocarpa]                              |
| 3000 | 30644 | gi 225453022 | 21.6  | 13 | 1 | 1 | Carbamidomethylation | 15113  | PREDICTED: pathogenesis-related protein PR-4 [Vitis vinifera]                             |
| 2855 | 30779 | gi 566212673 | 21.58 | 1  | 1 | 1 | Carbamidomethylation | 134320 | hypothetical protein POPTR_0017s11020g [Populus trichocarpa]                              |
| 3769 | 30838 | gi 225430352 | 21.52 | 19 | 1 | 1 |                      | 23983  | PREDICTED: stromal cell-derived factor 2-like protein [Vitis vinifera]                    |
| 3593 | 20721 | gi 225449250 | 21.52 | 9  | 1 | 1 |                      | 18193  | PREDICTED: 18.1 kDa class I heat shock protein [Vitis vinifera]                           |
| 3005 | 30857 | gi 566187626 | 21.06 | 3  | 1 | 1 |                      | 37674  | hypothetical protein POPTR_0009s12340g [Populus trichocarpa]                              |
| 3460 | 30959 | gi 225465290 | 21    | 17 | 1 | 1 |                      | 7858   | PREDICTED: NADH dehydrogenase [ubiquinone] 1 beta subcomplex subunit 3-B [Vitis vinifera] |

Table S6 The identified differentially expressed proteins between CK1 and HY1

| Protein Group | Protein ID | Accession    | Significance (-10lgP) | Coverage (%) | #Peptides | #Unique | PTM                                           | Sample 1 Area | Sample 2 Area | Sample 3 Area | Sample 4 Area | Sample 5 Area | Sample 6 Area | Sample Profile (Ratio)         | CK1 Area | H1 Area  | Group Profile (Ratio) | Avg. Mass | Description                                                                          |
|---------------|------------|--------------|-----------------------|--------------|-----------|---------|-----------------------------------------------|---------------|---------------|---------------|---------------|---------------|---------------|--------------------------------|----------|----------|-----------------------|-----------|--------------------------------------------------------------------------------------|
| 688           | 1634       | gi 225455513 | 102.19                | 25           | 3         | 3       | Carbamidomethylation;<br>Carbamidomethylation | 4.56E+06      | 6.72E+06      | 8.54E+06      | 4.47E+07      | 3.72E+07      | 3.84E+07      | 0.12:0.18:0.23:1.20:1.00:1.03  | 6.61E+06 | 4.01E+07 | 0.16:1.00             | 13646     | PREDICTED: 40S ribosomal protein S20-2 [Vitis vinifera]                              |
| 221           | 501        | gi 731406213 | 99.59                 | 6            | 5         | 4       | Carbamidomethylation                          | 4.75E+07      | 4.88E+07      | 4.74E+07      | 1.20E+08      | 1.10E+08      | 1.19E+08      | 0.43:0.44:0.43:1.09:1.00:1.08  | 4.79E+07 | 1.16E+08 | 0.41:1.00             | 92443     | PREDICTED: sucrose synthase [Vitis vinifera]                                         |
| 1057          | 1226       | gi 225436257 | 95.02                 | 12           | 3         | 3       |                                               | 8.27E+07      | 6.94E+07      | 1.03E+08      | 0             | 0             | 0             | 1.00:0.84:1.24:0:0:0           | 8.50E+07 | 0        | 1.00:0                | 29530     | PREDICTED: chlorophyll a-b binding protein 8 chloroplastic [Vitis vinifera]          |
| 1049          | 22099      | gi 566146555 | 88.9                  | 9            | 2         | 2       |                                               | 0             | 0             | 0             | 1.76E+07      | 1.91E+07      | 1.79E+07      | 1.00:0.93                      | 0        | 1.82E+07 | 00:01:0               | 23812     | protein L13                                                                          |
| 180           | 284        | gi 225433510 | 64.87                 | 4            | 2         | 1       |                                               | 4.53E+07      | 4.71E+07      | 4.13E+07      | 7.94E+07      | 7.53E+07      | 7.32E+07      | 0.60:0.63:0.55:1.05:1.00:0.97  | 4.46E+07 | 7.60E+07 | 0.59:1.00             | 51906     | PREDICTED: serine hydroxymethyltransferase 4 [Vitis vinifera]                        |
| 672           | 800        | gi 225447576 | 64.52                 | 15           | 4         | 1       | Carbamidomethylation;<br>Carbamidomethylation | 7.92E+06      | 1.39E+08      | 1.54E+08      | 1.40E+07      | 1.44E+07      | 6.56E+06      | 0.55:9.63:1.069:0.97:1.00:0.45 | 1.12E+08 | 1.17E+07 | 9.59:1.00             | 28468     | PREDICTED: chlorophyll a-b binding protein 151 chloroplastic [Vitis vinifera]        |
| 1306          | 3095       | gi 526117629 | 63.14                 | 8            | 1         | 1       | Carbamidomethylation                          | 5.90E+08      | 6.86E+08      | 5.86E+08      | 1.99E+08      | 1.87E+08      | 1.87E+08      | 3.15:3.66:3.13:1.06:1.00:1.00  | 6.21E+08 | 1.91E+08 | 3.25:1.00             | 11686     | lipid transfer protein precursor [Vitis vinifera]                                    |
| 1280          | 1980       | gi 225457389 | 60                    | 5            | 1         | 1       |                                               | 2.99E+07      | 2.65E+07      | 2.47E+07      | 0             | 0             | 0             | 1.00:0.89:0.83:0:0:0           | 2.70E+07 | 0        | 1.00:0                | 27867     | PREDICTED: chlorophyll a-b binding protein 4 chloroplastic [Vitis vinifera]          |
| 1481          | 3143       | gi 225443988 | 60                    | 7            | 1         | 1       |                                               | 1.72E+08      | 1.87E+08      | 1.79E+08      | 6.14E+07      | 7.10E+07      | -             | 2.43:2.64:2.52:0.87:1.00:-     | 1.79E+08 | 6.62E+07 | 2.71:1.00             | 13228     | PREDICTED: photosystem I reaction center subunit psaK chloroplastic [Vitis vinifera] |
| 311           | 903        | gi 566176273 | 60                    | 3            | 3         | 1       |                                               | 1.31E+08      | 1.34E+08      | 1.37E+08      | 2.41E+08      | 2.33E+08      | 2.84E+08      | 0.56:0.58:0.59:1.03:1.00:1.22  | 1.34E+08 | 2.53E+08 | 0.53:1.00             | 92143     | sucrose synthase family protein [Populus trichocarpa]                                |
| 1096          | 22084      | gi 731437331 | 60                    | 6            | 1         | 1       |                                               | 7.73E+06      | 1.16E+07      | 5.24E+06      | 7.66E+07      | 6.32E+07      | 6.55E+07      | 0.12:0.18:0.08:1.21:1.00:1.04  | 8.20E+06 | 6.84E+07 | 0.12:1.00             | 17820     | PREDICTED: 60S ribosomal protein L27a-3 [Vitis vinifera]                             |
| 1163          | 22123      | gi 225435203 | 60                    | 8            | 1         | 1       |                                               | 2.14E+06      | 0             | 7.50E+05      | 2.66E+07      | 2.32E+07      | 2.36E+07      | 0.09:0.03:1.14:1.00:1.02       | 9.65E+05 | 2.45E+07 | 0.04:1.00             | 15652     | PREDICTED: 40S ribosomal protein S23-like [Vitis vinifera]                           |
| 1276          | 22379      | gi 225432586 | 60                    | 7            | 1         | 1       |                                               | 2.32E+06      | 0             | 0             | 1.74E+07      | 1.43E+07      | 1.37E+07      | 0.16:0:0.121:1.00:0.96         | 7.72E+05 | 1.51E+07 | 0.05:1.00             | 16449     | PREDICTED: 40S ribosomal protein S16 [Vitis vinifera]                                |

|      |       |              |       |    |   |   |                                            |          |          |          |          |          |          |                               |          |          |           |        |                                                                   |
|------|-------|--------------|-------|----|---|---|--------------------------------------------|----------|----------|----------|----------|----------|----------|-------------------------------|----------|----------|-----------|--------|-------------------------------------------------------------------|
| 1491 | 3536  | gij225463990 | 60    | 3  | 1 | 1 |                                            | 6.38E+08 | 5.92E+08 | 5.77E+08 | 3.64E+07 | 2.64E+08 | 3.96E+08 | 2.42:2.24:2.19:0.14:1.00:1.50 | 6.02E+08 | 2.32E+08 | 2.59:1.00 | 29642  | PREDICTED: transcription repressor MYB6 [Vitis vinifera]          |
| 1313 | 3435  | gij731408416 | 60    | 4  | 2 | 1 |                                            | 6.00E+07 | 6.48E+07 | 6.08E+07 | 2.37E+07 | 4.00E+07 | 4.16E+07 | 1.50:1.62:1.52:0.59:1.00:1.04 | 6.19E+07 | 3.51E+07 | 1.76:1.00 | 53964  | PREDICTED: serine carboxypeptidase-like 13 [Vitis vinifera]       |
| 977  | 1803  | gij225429772 | 60    | 1  | 1 | 1 |                                            | 3.87E+07 | 4.20E+07 | 3.90E+07 | 1.58E+07 | 1.93E+07 | 1.98E+07 | 2.01:2.18:2.02:0.82:1.00:1.03 | 3.99E+07 | 1.83E+07 | 2.18:1.00 | 104811 | PREDICTED: plasma membrane ATPase 4 [Vitis vinifera]              |
| 1422 | 2651  | gij566256321 | 59.67 | 7  | 1 | 1 |                                            | 1.27E+09 | 1.38E+09 | 1.35E+09 | 4.98E+08 | 4.85E+08 | 4.41E+08 | 2.61:2.84:2.77:1.03:1.00:0.91 | 1.33E+09 | 4.75E+08 | 2.80:1.00 | 12448  | glycine-rich RNA-binding family protein [Populus trichocarpa]     |
| 574  | 22062 | gij225432758 | 58.61 | 6  | 2 | 1 | Carbamidomethylation                       | 0        | 0        | -        | 1.71E+07 | 1.54E+07 | 1.49E+07 | 0:0:-1.11:1.00:0.97           | 0        | 1.58E+07 | 00:01:0   | 29774  | PREDICTED: 40S ribosomal protein S3a-1 [Vitis vinifera]           |
| 1492 | 3734  | gij359494267 | 58.55 | 3  | 1 | 1 |                                            | 5.90E+07 | 6.05E+07 | 5.66E+07 | 3.47E+07 | 2.64E+07 | 2.04E+07 | 2.23:2.29:2.14:1.31:1.00:0.77 | 5.87E+07 | 2.72E+07 | 2.16:1.00 | 25766  | PREDICTED: probable glutathione S-transferase [Vitis vinifera]    |
| 466  | 774   | gij671743459 | 58.4  | 70 | 5 | 5 | Carbamidomethylation; Carbamidomethylation | 1.84E+08 | 1.42E+08 | 1.62E+08 | 5.08E+07 | 2.93E+07 | 2.97E+07 | 6.29:4.83:5.53:1.74:1.00:1.01 | 1.63E+08 | 3.48E+07 | 4.67:1.00 | 9038   | photosystem I subunit VII (chloroplast) [Camellia reticulata]     |
| 1426 | 2944  | gij566161648 | 56.77 | 5  | 1 | 1 |                                            | 3.17E+07 | 2.09E+07 | 2.49E+07 | 1.96E+07 | 9.14E+06 | 1.74E+07 | 3.47:2.28:2.73:2.15:1.00:1.90 | 2.58E+07 | 1.54E+07 | 1.68:1.00 | 17801  | glycine cleavage system protein H precursor [Populus trichocarpa] |
| 764  | 1359  | gij225429209 | 56.01 | 5  | 3 | 2 |                                            | 1.13E+08 | 1.14E+08 | 1.16E+08 | 7.85E+07 | 7.22E+07 | 7.64E+07 | 1.56:1.58:1.60:1.09:1.00:1.06 | 1.14E+08 | 7.57E+07 | 1.51:1.00 | 53142  | PREDICTED: serine carboxypeptidase-like 16 [Vitis vinifera]       |
| 1042 | 3388  | gij731398611 | 55.13 | 2  | 1 | 1 |                                            | 1.56E+07 | 9.32E+06 | 1.25E+07 | 3.16E+07 | 2.14E+07 | 2.07E+07 | 0.73:0.44:0.58:1.48:1.00:0.97 | 1.25E+07 | 2.46E+07 | 0.51:1.00 | 43372  | PREDICTED: proliferation-associated protein 2G4 [Vitis vinifera]  |
| 759  | 1066  | gij566158065 | 53.07 | 3  | 1 | 1 |                                            | 5.29E+07 | 5.84E+07 | 3.50E+07 | 3.51E+07 | 1.41E+07 | 2.20E+07 | 3.74:4.13:2.48:2.48:1.00:1.56 | 4.88E+07 | 2.50E+07 | 1.95:1.00 | 37108  | arginase family protein [Populus trichocarpa]                     |
| 1416 | 2440  | gij566187811 | 51.49 | 5  | 1 | 1 | Carbamidomethylation                       | 8.08E+06 | 1.01E+07 | 8.47E+06 | 3.15E+06 | 4.81E+06 | 4.76E+06 | 1.68:2.10:1.76:0.65:1.00:0.99 | 8.88E+06 | 4.24E+06 | 2.10:1.00 | 16218  | hypothetical protein POPTR_0009s13 460g [Populus trichocarpa]     |

|      |       |              |       |    |   |   |                      |          |          |          |          |          |          |                               |          |          |           |        |                                                                          |
|------|-------|--------------|-------|----|---|---|----------------------|----------|----------|----------|----------|----------|----------|-------------------------------|----------|----------|-----------|--------|--------------------------------------------------------------------------|
| 6    | 28    | gij359486799 | 50.79 | 8  | 4 | 1 |                      | 1.47E+07 | 9.54E+06 | 1.12E+07 | 3.25E+07 | 1.45E+07 | 1.99E+07 | 1.01:0.66:0.77:2.25:1.00:1.37 | 1.18E+07 | 2.23E+07 | 0.53:1.00 | 71171  | PREDICTED: heat shock cognate 70 kDa protein 2 [Vitis vinifera]          |
| 358  | 589   | gij224084209 | 50.66 | 2  | 1 | 1 |                      | 1.66E+08 | 1.47E+08 | 1.72E+08 | 5.30E+07 | 5.64E+07 | 5.31E+07 | 2.95:2.61:3.05:0.94:1.00:0.94 | 1.62E+08 | 5.42E+07 | 2.99:1.00 | 35142  | O2 evolving complex 33kD family protein [Populus trichocarpa]            |
| 1483 | 3258  | gij566255736 | 50.05 | 5  | 1 | 1 |                      | 1.02E+08 | 1.11E+08 | 1.03E+08 | 8.17E+07 | 2.85E+07 | 7.41E+07 | 3.57:3.91:3.63:2.87:1.00:2.60 | 1.05E+08 | 6.14E+07 | 1.72:1.00 | 15873  | hypothetical protein POPTR_0483s00 200g partial [Populus trichocarpa]    |
| 458  | 653   | gij224104269 | 48.28 | 17 | 3 | 1 |                      | 3.28E+07 | 3.56E+07 | 3.36E+07 | 7.58E+07 | 6.44E+07 | 6.64E+07 | 0.51:0.55:0.52:1.18:1.00:1.03 | 3.40E+07 | 6.89E+07 | 0.49:1.00 | 22228  | peptidyl-prolyl cis-trans isomerase family protein [Populus trichocarpa] |
| 1509 | 7727  | gij225453275 | 47.49 | 4  | 1 | 1 | Carbamidomethylation | 5.63E+07 | 7.51E+07 | 6.58E+07 | 2.96E+07 | 3.65E+07 | 3.88E+07 | 1.54:2.06:1.81:0.81:1.00:1.06 | 6.57E+07 | 3.49E+07 | 1.88:1.00 | 14633  | PREDICTED: 20 kDa chaperonin chloroplastic [Vitis vinifera]              |
| 465  | 22032 | gij225451279 | 46.72 | 8  | 2 | 1 |                      | 1.86E+06 | 5.91E+05 | 1.32E+06 | 1.60E+07 | 1.25E+07 | 1.38E+07 | 0.15:0.05:0.11:1.28:1.00:1.10 | 1.26E+06 | 1.41E+07 | 0.09:1.00 | 29903  | PREDICTED: 40S ribosomal protein S3a-2-like [Vitis vinifera]             |
| 960  | 14659 | gij566202763 | 46.53 | 7  | 1 | 1 |                      | 6.03E+06 | 6.25E+06 | 6.56E+06 | 2.78E+07 | 2.31E+07 | 2.57E+07 | 0.26:0.27:0.28:1.20:1.00:1.11 | 6.28E+06 | 2.55E+07 | 0.25:1.00 | 24245  | 60S ribosomal protein L15 [Populus trichocarpa]                          |
| 857  | 22042 | gij225456914 | 44.51 | 7  | 1 | 1 |                      | 4.84E+06 | 3.83E+06 | 4.32E+06 | 6.21E+07 | 4.94E+07 | 3.85E+07 | 0.10:0.08:0.09:1.26:1.00:0.78 | 4.33E+06 | 5.00E+07 | 0.09:1.00 | 16350  | PREDICTED: 60S ribosomal protein L27a-3 [Vitis vinifera]                 |
| 557  | 1567  | gij731395934 | 44.5  | 2  | 1 | 1 |                      | 2.06E+07 | 2.03E+07 | 1.73E+07 | 5.11E+07 | 4.49E+07 | 4.79E+07 | 0.46:0.45:0.39:1.14:1.00:1.07 | 1.94E+07 | 4.80E+07 | 0.40:1.00 | 58724  | PREDICTED: putative proline--tRNA ligase C19C7.06 [Vitis vinifera]       |
| 456  | 577   | gij224077927 | 43.56 | 3  | 1 | 1 |                      | 1.22E+08 | 1.46E+08 | 1.51E+08 | 7.66E+07 | 8.54E+07 | 1.02E+08 | 1.43:1.71:1.77:0.90:1.00:1.20 | 1.40E+08 | 8.80E+07 | 1.59:1.00 | 42796  | latex plastidic aldolase-like family protein [Populus trichocarpa]       |
| 134  | 485   | gij731393844 | 43.35 | 3  | 3 | 2 |                      | 1.83E+07 | 1.53E+07 | 1.46E+07 | 3.13E+07 | 2.81E+07 | 2.50E+07 | 0.65:0.54:0.52:1.11:1.00:0.89 | 1.61E+07 | 2.81E+07 | 0.57:1.00 | 101855 | PREDICTED: protein argonaute 4 [Vitis vinifera]                          |
| 1245 | 2676  | gij566175322 | 43.3  | 3  | 1 | 1 |                      | 1.46E+07 | 2.05E+07 | 1.68E+07 | 1.09E+07 | 8.66E+06 | 7.42E+06 | 1.69:2.36:1.94:1.25:1.00:0.86 | 1.73E+07 | 8.74E+06 | 1.98:1.00 | 35273  | aldo/keto reductase family protein [Populus trichocarpa]                 |
| 1461 | 22329 | gij566203933 | 39.99 | 10 | 1 | 1 |                      | 0        | 0        | 0        | 1.20E+07 | 9.57E+06 | 8.84E+06 | 0:0:0:1.26:1.00:0.92          | 0        | 1.01E+07 | 00:01.0   | 13893  | 60S ribosomal protein L22-1 [Populus trichocarpa]                        |

|      |       |              |       |    |   |   |                      |          |          |          |          |          |          |                                  |          |          |            |       |                                                                                           |
|------|-------|--------------|-------|----|---|---|----------------------|----------|----------|----------|----------|----------|----------|----------------------------------|----------|----------|------------|-------|-------------------------------------------------------------------------------------------|
| 858  | 22074 | gij731410160 | 38.1  | 2  | 1 | 1 |                      | 1.01E+07 | 9.03E+06 | 9.46E+06 | 6.19E+06 | 6.02E+06 | 6.09E+06 | 1.69:1.50:1.57:1.03:1.00:1.01    | 9.54E+06 | 6.10E+06 | 1.56:1.00  | 44936 | PREDICTED: transcription initiation factor TFIIID subunit 15b isoform X2 [Vitis vinifera] |
| 1160 | 3488  | gij225459318 | 38.08 | 3  | 1 | 1 |                      | 8.47E+06 | 9.94E+06 | 9.26E+06 | 1.72E+07 | 1.66E+07 | 1.54E+07 | 0.51:0.60:0.56:1.03:1.00:0.93    | 9.22E+06 | 1.64E+07 | 0.56:1.00  | 35188 | PREDICTED: annexin D1 [Vitis vinifera]                                                    |
| 304  | 559   | gij552540866 | 36.63 | 4  | 1 | 1 |                      | 2.97E+06 | 3.45E+06 | 2.81E+06 | 7.40E+06 | 5.20E+06 | 6.11E+06 | 0.57:0.66:0.54:1.42:1.00:1.17    | 3.08E+06 | 6.24E+06 | 0.49:1.00  | 35220 | cytochrome f (chloroplast) [Camellia danzaiensis]                                         |
| 285  | 437   | gij224053300 | 36.6  | 5  | 1 | 1 |                      | 8.00E+06 | 6.48E+06 | 6.37E+06 | 5.25E+07 | 4.02E+07 | 4.42E+07 | 0.20:0.16:0.16:1.30:1.00:1.10    | 6.95E+06 | 4.56E+07 | 0.15:1.00  | 17702 | ubiquitin/ribosomal protein 27a [Populus trichocarpa]                                     |
| 1201 | 3338  | gij731436245 | 36.44 | 1  | 1 | 1 |                      | 1.86E+08 | 1.54E+08 | 1.73E+08 | 3.73E+07 | 7.38E+07 | 5.91E+07 | 2.52:2.08:2.35:0.50:1.00:0.80    | 1.71E+08 | 5.67E+07 | 3.02:1.00  | 66120 | PREDICTED: putative laccase-9 [Vitis vinifera]                                            |
| 1470 | 2753  | gij225447745 | 35.89 | 8  | 1 | 1 |                      | 4.40E+07 | 4.65E+07 | 4.19E+07 | 1.50E+06 | 3.08E+06 | 2.97E+06 | 14.28:15.09:13.62:0.49:1.00:0.96 | 4.41E+07 | 2.46E+06 | 17.95:1.00 | 27216 | PREDICTED: chlorophyll a-b binding protein CP24 10A chloroplastic [Vitis vinifera]        |
| 1382 | 6409  | gij225427973 | 35.24 | 3  | 1 | 1 |                      | 7.44E+07 | 9.05E+07 | 1.03E+08 | 7.54E+07 | 5.96E+07 | 2.53E+07 | 1.25:1.52:1.73:1.26:1.00:0.42    | 8.93E+07 | 5.34E+07 | 1.67:1.00  | 19853 | PREDICTED: glycine-rich protein 2-like [Vitis vinifera]                                   |
| 341  | 812   | gij224064707 | 34.96 | 2  | 2 | 2 |                      | 4.85E+07 | 3.51E+07 | 3.64E+07 | 2.44E+07 | 2.56E+07 | 2.26E+07 | 1.90:1.37:1.42:0.95:1.00:0.89    | 4.00E+07 | 2.42E+07 | 1.65:1.00  | 58836 | mitochondrial aldehyde dehydrogenase family protein [Populus trichocarpa]                 |
| 278  | 455   | gij359483839 | 34.48 | 33 | 6 | 1 | Carbamidomethylation | 1.99E+07 | 1.11E+07 | 1.08E+07 | 0        | 0        | 0        | 1.00:0.56:0.55:0:0:0             | 1.39E+07 | 0        | 1.00:0     | 27890 | PREDICTED: chlorophyll a-b binding protein of LHClI type 1 [Vitis vinifera]               |
| 1220 | 1694  | gij731416683 | 34.43 | 14 | 1 | 1 | Carbamidomethylation | 2.04E+06 | 1.24E+06 | 1.36E+06 | 8.17E+06 | 5.28E+06 | 5.00E+06 | 0.39:0.24:0.26:1.55:1.00:0.95    | 1.55E+06 | 6.15E+06 | 0.25:1.00  | 15282 | PREDICTED: superoxide dismutase [Cu-Zn] isoform X2 [Vitis vinifera]                       |
| 1447 | 4160  | gij566212112 | 34.04 | 1  | 1 | 1 | Carbamidomethylation | 1.31E+07 | 1.24E+07 | 1.52E+07 | 6.21E+06 | 5.52E+06 | 5.14E+06 | 2.37:2.24:2.76:1.13:1.00:0.93    | 1.36E+07 | 5.62E+06 | 2.41:1.00  | 67792 | hypothetical protein POPTR_0017s08 080g [Populus trichocarpa]                             |
| 1284 | 2062  | gij359497056 | 33.61 | 3  | 1 | 1 |                      | 3.22E+07 | 3.86E+07 | 3.90E+07 | 6.04E+07 | 5.20E+07 | 5.54E+07 | 0.62:0.74:0.75:1.16:1.00:1.06    | 3.66E+07 | 5.59E+07 | 0.65:1.00  | 35941 | PREDICTED: peroxidase 10-like [Vitis vinifera]                                            |

|      |       |              |       |    |   |   |                      |          |          |          |          |          |          |                               |          |          |           |       |                                                                                        |
|------|-------|--------------|-------|----|---|---|----------------------|----------|----------|----------|----------|----------|----------|-------------------------------|----------|----------|-----------|-------|----------------------------------------------------------------------------------------|
| 673  | 869   | gi 225449262 | 32.62 | 11 | 2 | 1 |                      | 4.23E+07 | 4.77E+07 | 4.31E+07 | 2.08E+07 | 1.84E+07 | 2.22E+07 | 2.30:2.59:2.34:1.13:1.00:1.21 | 4.44E+07 | 2.05E+07 | 2.17:1.00 | 18173 | PREDICTED: 18.1 kDa class I heat shock protein [Vitis vinifera]                        |
| 1270 | 22200 | gi 224092348 | 32.22 | 11 | 1 | 1 | Carbamidomethylation | 0        | 0        | 0        | 1.45E+07 | 9.69E+06 | 9.17E+06 | 0:0:0:1.49:1.00:0.95          | 0        | 1.11E+07 | 00:01:0   | 10699 | hypothetical protein POPTR_0006s25 990g [Populus trichocarpa]                          |
| 165  | 293   | gi 225468576 | 32.1  | 2  | 2 | 1 |                      | 2.08E+07 | -        | 1.81E+07 | 4.73E+07 | 4.24E+07 | 3.88E+07 | 0.49:-:0.43:1.12:1.00:0.92    | 1.95E+07 | 4.28E+07 | 0.45:1.00 | 98187 | PREDICTED: aconitate hydratase 1 [Vitis vinifera]                                      |
| 1393 | 2697  | gi 224098816 | 31.19 | 3  | 1 | 1 |                      | 1.78E+06 | 1.14E+06 | 3.44E+05 | 5.39E+06 | 4.81E+06 | 3.23E+06 | 0.37:0.24:0.07:1.12:1.00:0.67 | 1.09E+06 | 4.48E+06 | 0.24:1.00 | 45803 | latex abundant family protein [Populus trichocarpa]                                    |
| 310  | 532   | gi 671743315 | 30.38 | 5  | 3 | 3 |                      | 7.83E+07 | 9.53E+07 | 9.86E+07 | 4.83E+07 | 3.32E+07 | 4.63E+07 | 2.36:2.87:2.97:1.45:1.00:1.39 | 9.08E+07 | 4.26E+07 | 2.13:1.00 | 51822 | photosystem II CP43 chlorophyll apoprotein (chloroplast) [Camellia pubicosta]          |
| 704  | 1197  | gi 566170863 | 30.37 | 10 | 1 | 1 |                      | 1.76E+07 | 1.77E+07 | 2.00E+07 | 1.58E+08 | 1.31E+08 | 1.50E+08 | 0.13:0.13:0.15:1.20:1.00:1.15 | 1.84E+07 | 1.47E+08 | 0.13:1.00 | 11409 | histone H4 family protein [Populus trichocarpa]                                        |
| 419  | 3070  | gi 731430736 | 30.18 | 11 | 3 | 2 | Carbamidomethylation | 2.64E+06 | 3.70E+06 | 1.35E+06 | 1.76E+07 | 1.42E+07 | 1.29E+07 | 0.19:0.26:0.09:1.23:1.00:0.91 | 2.42E+06 | 1.49E+07 | 0.16:1.00 | 44590 | PREDICTED: 60S ribosomal protein L3 [Vitis vinifera]                                   |
| 1212 | 14747 | gi 225469850 | 30    | 4  | 1 | 1 |                      | 0        | 0        | 2.15E+06 | 1.57E+07 | 8.50E+06 | 1.56E+06 | 0:0:0.25:1.84:1.00:0.18       | 7.17E+05 | 8.57E+06 | 0.08:1.00 | 39160 | PREDICTED: uncharacterized protein DDB_G0288133 [Vitis vinifera]                       |
| 300  | 866   | gi 225437428 | 29.6  | 3  | 2 | 1 |                      | 4.40E+07 | 1.29E+07 | 4.01E+07 | 1.10E+08 | 1.13E+08 | 8.88E+07 | 0.39:0.11:0.35:0.97:1.00:0.78 | 3.79E+07 | 1.04E+08 | 0.36:1.00 | 92483 | PREDICTED: sucrose synthase 2 [Vitis vinifera]                                         |
| 794  | 1140  | gi 731421236 | 29.45 | 2  | 1 | 1 |                      | 3.89E+07 | 3.84E+07 | 3.92E+07 | 3.06E+07 | 1.79E+07 | 2.17E+07 | 2.17:2.14:2.18:1.70:1.00:1.21 | 3.89E+07 | 2.34E+07 | 1.66:1.00 | 37446 | PREDICTED: arginase 1 mitochondrial [Vitis vinifera]                                   |
| 1048 | 22044 | gi 224104103 | 29.3  | 7  | 1 | 1 |                      | 0        | 0        | 0        | 5.64E+06 | 4.14E+06 | 6.24E+06 | 0:0:0:1.36:1.00:1.51          | 0        | 5.34E+06 | 00:01:0   | 24868 | 40S ribosomal protein S8 [Populus trichocarpa]                                         |
| 788  | 22030 | gi 225462285 | 29.08 | 2  | 1 | 1 |                      | 6.64E+06 | 4.24E+06 | 4.88E+06 | 1.28E+07 | 1.13E+07 | 6.27E+06 | 0.59:0.38:0.43:1.13:1.00:0.56 | 5.25E+06 | 1.01E+07 | 0.52:1.00 | 52600 | PREDICTED: inosine-5'-monophosphate dehydrogenase [Vitis vinifera]                     |
| 254  | 1246  | gi 359492254 | 28.99 | 2  | 1 | 1 |                      | 2.31E+07 | 2.09E+07 | 2.75E+07 | 1.64E+07 | 1.27E+07 | 9.80E+06 | 1.82:1.64:2.16:1.29:1.00:0.77 | 2.38E+07 | 1.29E+07 | 1.84:1.00 | 40876 | PREDICTED: ferredoxin--NADP reductase leaf-type isozyme chloroplastic [Vitis vinifera] |



|      |       |              |       |    |   |   |                      |          |          |          |          |          |          |                               |          |          |           |       |                                                                 |
|------|-------|--------------|-------|----|---|---|----------------------|----------|----------|----------|----------|----------|----------|-------------------------------|----------|----------|-----------|-------|-----------------------------------------------------------------|
| 808  | 1973  | gij224066545 | 28.91 | 11 | 2 | 1 |                      | 1.03E+07 | 1.04E+07 | 1.03E+07 | 6.15E+06 | 4.46E+06 | 0        | 2.31:2.34:2.31:1.38:1.00:0    | 1.03E+07 | 3.54E+06 | 2.92:1.00 | 15325 | 40S ribosomal protein S12-1 [Populus trichocarpa]               |
| 1021 | 1861  | gij566162704 | 28.08 | 8  | 1 | 1 |                      | 1.65E+07 | 1.13E+07 | 1.28E+07 | 3.70E+05 | 2.50E+06 | 2.24E+06 | 6.61:4.50:5.13:0.15:1.00:0.89 | 1.35E+07 | 1.87E+06 | 7.24:1.00 | 18629 | hypothetical protein POPTR_0003s14870g [Populus trichocarpa]    |
| 1074 | 2016  | gij225429975 | 28.07 | 2  | 1 | 1 |                      | 4.72E+07 | 4.67E+07 | 3.86E+07 | 6.83E+07 | 7.64E+07 | 7.59E+07 | 0.62:0.61:0.51:0.89:1.00:0.99 | 4.42E+07 | 7.35E+07 | 0.60:1.00 | 39098 | PREDICTED: bark storage protein A [Vitis vinifera]              |
| 1004 | 22157 | gij224124892 | 27.4  | 6  | 1 | 1 |                      | 2.61E+07 | 2.53E+07 | 2.54E+07 | 4.29E+07 | 3.45E+07 | 4.78E+07 | 0.76:0.73:0.74:1.24:1.00:1.38 | 2.56E+07 | 4.18E+07 | 0.61:1.00 | 22641 | rhicadhesin receptor family protein [Populus trichocarpa]       |
| 1003 | 22131 | gij225428011 | 26.92 | 2  | 1 | 1 |                      | 2.05E+06 | 0        | 0        | 3.98E+06 | 2.62E+06 | 2.33E+06 | 0.78:0:0:1.52:1.00:0.89       | 6.82E+05 | 2.98E+06 | 0.23:1.00 | 61287 | PREDICTED: synaptotagmin-2 [Vitis vinifera]                     |
| 1486 | 3357  | gij225424750 | 26.88 | 7  | 1 | 1 | Carbamidomethylation | 1.46E+07 | 1.88E+07 | 1.80E+07 | 6.99E+06 | 7.13E+06 | 7.86E+06 | 2.05:2.64:2.52:0.98:1.00:1.10 | 1.71E+07 | 7.33E+06 | 2.34:1.00 | 11841 | PREDICTED: gibberellin-regulated protein 11 [Vitis vinifera]    |
| 802  | 1500  | gij566165056 | 26.48 | 3  | 1 | 1 |                      | 2.28E+07 | 1.44E+07 | 1.40E+07 | 4.83E+07 | 3.86E+07 | 3.11E+07 | 0.59:0.37:0.36:1.25:1.00:0.81 | 1.71E+07 | 3.93E+07 | 0.43:1.00 | 36365 | hypothetical protein POPTR_0004s05340g [Populus trichocarpa]    |
| 260  | 381   | gij225457971 | 26.01 | 4  | 2 | 1 | Carbamidomethylation | 8.40E+07 | 1.37E+08 | 1.33E+08 | 5.02E+07 | 6.07E+07 | 7.25E+07 | 1.38:2.26:2.20:0.83:1.00:1.19 | 1.18E+08 | 6.11E+07 | 1.93:1.00 | 40415 | PREDICTED: flavanone 3-dioxygenase [Vitis vinifera]             |
| 547  | 1249  | gij566197644 | 25.98 | 3  | 1 | 1 |                      | 1.51E+07 | 1.11E+07 | 1.15E+07 | 8.50E+06 | 7.51E+06 | 7.20E+06 | 2.01:1.47:1.54:1.13:1.00:0.96 | 1.22E+07 | 7.64E+06 | 1.60:1.00 | 26318 | hypothetical protein POPTR_0012s09540g [Populus trichocarpa]    |
| 1538 | 30003 | gij224064488 | 25.35 | 3  | 1 | 1 |                      | 0        | 0        | 0        | 6.05E+06 | 5.22E+06 | 5.92E+06 | 0:0:0:1.16:1.00:1.13          | 0        | 5.73E+06 | 00:01:0   | 38979 | DNAJ heat shock family protein [Populus trichocarpa]            |
| 1456 | 7857  | gij566197051 | 25.11 | 1  | 1 | 1 |                      | 1.21E+08 | 1.50E+08 | 1.60E+08 | 6.52E+07 | 7.88E+07 | 7.94E+07 | 1.54:1.90:2.03:0.83:1.00:1.01 | 1.44E+08 | 7.44E+07 | 1.93:1.00 | 92823 | hypothetical protein POPTR_0012s06300g [Populus trichocarpa]    |
| 683  | 1434  | gij359480225 | 25.01 | 8  | 3 | 1 | Carbamidomethylation | 2.33E+07 | 2.61E+07 | 2.29E+07 | 1.20E+07 | 1.58E+07 | 1.42E+07 | 1.47:1.65:1.45:0.76:1.00:0.89 | 2.41E+07 | 1.40E+07 | 1.72:1.00 | 27397 | PREDICTED: peptidyl-prolyl cis-trans isomerase [Vitis vinifera] |
| 432  | 1514  | gij359475502 | 24.51 | 2  | 1 | 1 | Carbamidomethylation | 1.79E+07 | 1.65E+07 | 1.92E+07 | 6.38E+06 | 1.34E+07 | 8.13E+06 | 1.33:1.23:1.43:0.48:1.00:0.61 | 1.78E+07 | 9.30E+06 | 1.92:1.00 | 37652 | PREDICTED: malate dehydrogenase glyoxysomal [Vitis vinifera]    |

|      |       |              |       |    |   |   |                      |          |          |          |          |          |          |                                 |          |          |            |        |                                                                           |
|------|-------|--------------|-------|----|---|---|----------------------|----------|----------|----------|----------|----------|----------|---------------------------------|----------|----------|------------|--------|---------------------------------------------------------------------------|
| 1285 | 2067  | gi 225425513 | 24.26 | 4  | 1 | 1 |                      | 2.08E+07 | 1.23E+07 | 2.19E+07 | 1.14E+07 | 1.21E+07 | 9.12E+06 | 1.71:1.01:1.80:0.94:1.00:0.75   | 1.83E+07 | 1.09E+07 | 1.68:1.00  | 15254  | PREDICTED: uncharacterized protein At4g28440 [Vitis vinifera]             |
| 1343 | 22406 | gi 225464489 | 23.8  | 9  | 1 | 1 |                      | 0        | 0        | 0        | 2.90E+06 | 1.89E+06 | 2.06E+06 | 0:0:0:1.53:1.00:1.09            | 0        | 2.29E+06 | 00:01:0    | 12497  | PREDICTED: 60S ribosomal protein L36-3 [Vitis vinifera]                   |
| 397  | 665   | gi 225423961 | 23.45 | 1  | 1 | 1 |                      | 1.01E+07 | 5.70E+06 | 4.75E+06 | 1.29E+07 | 1.08E+07 | 1.15E+07 | 0.94:0.53:0.44:1.20:1.00:1.07   | 6.86E+06 | 1.17E+07 | 0.58:1.00  | 103148 | PREDICTED: alpha-xylosidase I [Vitis vinifera]                            |
| 805  | 1643  | gi 566171771 | 23.29 | 2  | 1 | 1 |                      | 6.22E+06 | 4.40E+06 | 2.73E+06 | 1.42E+07 | 1.28E+07 | 1.13E+07 | 0.49:0.35:0.21:1.11:1.00:0.88   | 4.45E+06 | 1.28E+07 | 0.35:1.00  | 53299  | hypothetical protein POPTR_0005s16 590g partial [Populus trichocarpa]     |
| 669  | 22071 | gi 224090212 | 22.83 | 6  | 2 | 1 |                      | 2.23E+07 | 0        | 0        | 7.80E+07 | 8.56E+07 | 8.87E+07 | 0.26:0:0:0.91:1.00:1.00:4       | 7.43E+06 | 8.41E+07 | 0.09:1.00  | 29609  | 40S ribosomal protein S2 [Populus trichocarpa]                            |
| 892  | 1552  | gi 224095668 | 22.67 | 5  | 1 | 1 |                      | 3.71E+07 | 2.60E+07 | 2.20E+07 | 5.32E+07 | 4.52E+07 | 3.60E+07 | 0.82:0.58:0.49:1.18:1.00:0.80   | 2.84E+07 | 4.48E+07 | 0.63:1.00  | 35550  | hypothetical protein POPTR_0007s01 850g [Populus trichocarpa]             |
| 948  | 2264  | gi 225434133 | 22.66 | 3  | 1 | 1 |                      | 1.03E+07 | 9.88E+06 | 1.08E+07 | 1.93E+07 | 1.54E+07 | 1.41E+07 | 0.67:0.64:0.70:1.26:1.00:0.92   | 1.04E+07 | 1.63E+07 | 0.64:1.00  | 40613  | PREDICTED: cysteine synthase chloroplastic/chromoplastic [Vitis vinifera] |
| 760  | 1097  | gi 225459564 | 22.44 | 7  | 1 | 1 |                      | 7.79E+06 | 7.65E+07 | 9.24E+07 | 7.10E+06 | 2.84E+06 | 2.15E+06 | 2.74:26.88:32.48:2.50:1.00:0.76 | 5.89E+07 | 4.03E+06 | 14.60:1.00 | 28575  | PREDICTED: photosystem II 22 kDa protein chloroplastic [Vitis vinifera]   |
| 1462 | 22346 | gi 224066487 | 21.92 | 5  | 1 | 1 |                      | 3.25E+06 | 4.18E+06 | 3.25E+06 | 5.87E+07 | 4.98E+07 | 5.48E+07 | 0.07:0.08:0.07:1.18:1.00:1.10   | 3.56E+06 | 5.44E+07 | 0.07:1.00  | 17636  | hypothetical protein POPTR_0002s05 220g [Populus trichocarpa]             |
| 357  | 522   | gi 566184073 | 21.61 | 8  | 2 | 1 | Carbamidomethylation | 4.12E+07 | 4.57E+07 | 0        | 7.63E+06 | 1.37E+07 | 2.05E+07 | 3.00:3.33:0.56:1.00:1.49        | 3.47E+07 | 1.39E+07 | 2.49:1.00  | 22518  | photosystem I 20kD family protein [Populus trichocarpa]                   |
| 390  | 7356  | gi 359497883 | 21.45 | 26 | 5 | 1 |                      | 3.16E+06 | 2.53E+06 | 5.20E+05 | 2.33E+07 | 3.28E+07 | 1.63E+07 | 0.10:0.08:0.02:0.71:1.00:0.50   | 2.07E+06 | 2.41E+07 | 0.09:1.00  | 15406  | PREDICTED: histone H3.3 [Vitis vinifera]                                  |
| 1431 | 3106  | gi 224109620 | 21.3  | 4  | 1 | 1 |                      | 3.48E+07 | 4.14E+07 | 3.76E+07 | 1.70E+07 | 2.34E+07 | 3.08E+07 | 1.49:1.77:1.61:0.73:1.00:1.32   | 3.79E+07 | 2.37E+07 | 1.60:1.00  | 24252  | chalcone isomerase family protein [Populus trichocarpa]                   |
| 694  | 3014  | gi 225443760 | 20.76 | 8  | 1 | 1 |                      | 0-       | 0        | 0        | 8.05E+06 | 7.28E+06 | 6.81E+06 | 0:-:0:1.11:1.00:0.94            | 0        | 7.38E+06 | 00:01:0    | 20875  | PREDICTED: 60S ribosomal protein L11-1-like [Vitis vinifera]              |

|      |       |             |       |    |   |   |                      |          |          |          |          |          |          |                                          |          |          |            |       |                                                                                           |
|------|-------|-------------|-------|----|---|---|----------------------|----------|----------|----------|----------|----------|----------|------------------------------------------|----------|----------|------------|-------|-------------------------------------------------------------------------------------------|
| 819  | 22248 | gi566151109 | 20.65 | 4  | 2 | 1 |                      | 0        | 0        | 0        | 1.66E+07 | 1.40E+07 | 1.11E+07 | 0:0:0:1.19:<br>1.00:0.79                 | 0        | 1.39E+07 | 00:01:0    | 37403 | hypothetical<br>protein<br>POPTR_0001s26<br>400g [Populus<br>trichocarpa]                 |
| 1487 | 3368  | gi731438465 | 20.56 | 3  | 1 | 1 |                      | 1.28E+07 | 1.35E+07 | 1.02E+07 | 6.17E+06 | 8.94E+06 | 8.41E+06 | 1.43:1.51:1<br>.14:0.69:1<br>00:0.94     | 1.22E+07 | 7.84E+06 | 1.55:1.00  | 26979 | PREDICTED: 3-<br>isopropylmalate<br>dehydratase small<br>subunit 3 [Vitis<br>vinifera]    |
| 308  | 404   | gi671743230 | 20.34 | 3  | 2 | 2 | Carbamidomethylation | 7.00E+07 | 4.26E+07 | 7.26E+07 | 5.57E+05 | 1.01E+06 | 1.35E+06 | 69.47:42.2<br>5:72.08:0.5<br>5:1.00:1.34 | 6.07E+07 | 9.71E+05 | 62.49:1.00 | 82370 | photosystem I<br>P700 apoprotein<br>A2 (chloroplast)<br>[Camellia<br>petelotii]           |
| 463  | 1862  | gi731388721 | 20.26 | 10 | 1 | 1 |                      | 3.00E+07 | 3.23E+07 | 2.85E+07 | 5.04E+07 | 4.46E+07 | 4.22E+07 | 0.67:0.72:0<br>.64:1.13:1<br>00:0.95     | 3.03E+07 | 4.57E+07 | 0.66:1.00  | 18965 | PREDICTED:<br>translationally-<br>controlled tumor<br>protein homolog<br>[Vitis vinifera] |

Table S7 The identified differentially expressed proteins between CK2 and HY2

| Protein Gr | Protein ID | Accession   | Significance (-10lgP) | Coverage (%) | #Peptides | #Unique | Sample 7 Area | Sample 8 Area | Sample 9 Area | Sample 10 Area | Sample 11 Area | Sample 12 Area | Sample Profile (Ratio)                | CK2 Area | H2 Area  | Group Profile (Ratio) | Avg. Mass | Description                                                                                              |
|------------|------------|-------------|-----------------------|--------------|-----------|---------|---------------|---------------|---------------|----------------|----------------|----------------|---------------------------------------|----------|----------|-----------------------|-----------|----------------------------------------------------------------------------------------------------------|
| 1304       | 1895       | gi731428049 | 101.58                | 10           | 3         | 3       | 2.26E+07      | 1.68E+07      | 1.70E+07      | 6.75E+07       | 5.05E+07       | 3.58E+07       | 0.63:0.47:<br>0.47:1.88:<br>1.41:1.00 | 1.88E+07 | 5.13E+07 | 0.37:1.00             | 47334     | PREDICTED: delta-aminolevulinic acid dehydratase chloroplastic [Vitis vinifera]                          |
| 383        | 292        | gi542688125 | 100.7                 | 11           | 6         | 6       | 3.67E+08      | 3.52E+08      | 3.28E+08      | 1.56E+08       | 1.36E+08       | 1.29E+08       | 2.86:2.74:<br>2.55:1.21:<br>1.06:1.00 | 3.49E+08 | 1.40E+08 | 2.49:1.00             | 56099     | photosystem II p680 chlorophyll A apoprotein CP-47 (chloroplast) [Camellia taliensis]                    |
| 1021       | 900        | gi566207041 | 90.61                 | 9            | 3         | 2       | 3.54E+07      | 3.09E+07      | 2.52E+07      | 1.01E+08       | 6.78E+07       | 5.60E+07       | 0.63:0.55:<br>0.45:1.80:<br>1.21:1.00 | 3.05E+07 | 7.48E+07 | 0.41:1.00             | 53652     | glutamate 1-semialdehyde aminotransferase family protein [Populus trichocarpa]                           |
| 1398       | 970        | gi731403303 | 86.64                 | 19           | 2         | 1       | 7.28E+07      | 5.43E+07      | 4.60E+07      | 1.80E+08       | 1.49E+08       | 1.01E+08       | 0.72:0.54:<br>0.46:1.79:<br>1.47:1.00 | 5.77E+07 | 1.43E+08 | 0.40:1.00             | 15026     | PREDICTED: 40S ribosomal protein S12 [Vitis vinifera]                                                    |
| 265        | 218        | gi359478916 | 80.62                 | 25           | 6         | 2       | 1.03E+08      | 1.14E+08      | 1.13E+08      | 2.51E+08       | 1.98E+08       | 1.64E+08       | 0.63:0.70:<br>0.69:1.53:<br>1.21:1.00 | 1.10E+08 | 2.04E+08 | 0.54:1.00             | 48674     | PREDICTED: ribulose biphosphate carboxylase/oxygenase activase chloroplastic isoform X2 [Vitis vinifera] |
| 526        | 600        | gi552541026 | 77.25                 | 3            | 3         | 3       | 2.29E+08      | 2.06E+08      | 1.50E+08      | 3.69E+07       | 5.53E+07       | 8.25E+07       | 2.78:2.50:<br>1.81:0.45:<br>0.67:1.00 | 1.95E+08 | 6.09E+07 | 3.21:1.00             | 83146     | photosystem I P700 chlorophyll A apoprotein A1 (chloroplast) [Camellia yunnanensis]                      |
| 472        | 404        | gi671743230 | 76.9                  | 5            | 3         | 3       | 1.28E+08      | 1.12E+08      | 9.70E+07      | 5.84E+07       | 5.80E+07       | 4.96E+07       | 2.59:2.26:<br>1.95:1.18:<br>1.17:1.00 | 1.13E+08 | 5.54E+07 | 2.03:1.00             | 82370     | photosystem I P700 apoprotein A2 (chloroplast) [Camellia petelotii]                                      |
| 10         | 2          | gi669100005 | 75.46                 | 33           | 14        | 14      | 3.41E+09      | 2.97E+09      | 2.74E+09      | 1.63E+09       | 1.61E+09       | 1.50E+09       | 2.28:1.98:<br>1.83:1.09:<br>1.07:1.00 | 3.04E+09 | 1.58E+09 | 1.93:1.00             | 52635     | ribulose biphosphate carboxylase large chain (chloroplast) [Camellia crapnelliana]                       |
| 174        | 527        | gi731424802 | 75.2                  | 2            | 1         | 1       | 3.10E+07      | 2.33E+07      | 1.61E+07      | 8.84E+07       | 5.12E+07       | 3.30E+07       | 0.94:0.71:<br>0.49:2.68:<br>1.55:1.00 | 2.35E+07 | 5.75E+07 | 0.41:1.00             | 101244    | PREDICTED: heat shock protein 101 isoform X1 [Vitis vinifera]                                            |
| 1143       | 45542      | gi731394579 | 74.86                 | 7            | 1         | 1       | 1.92E+07      | 1.67E+07      | 1.49E+07      | 5.12E+07       | 4.75E+07       | 3.71E+07       | 0.52:0.45:<br>0.40:1.38:<br>1.28:1.00 | 1.69E+07 | 4.53E+07 | 0.37:1.00             | 24605     | PREDICTED: 60S ribosomal protein L10a-1-like [Vitis vinifera]                                            |
| 215        | 482        | gi731419756 | 72.51                 | 9            | 3         | 2       | 3.22E+07      | 2.59E+07      | 3.92E+07      | 9.27E+07       | 6.24E+07       | 4.20E+07       | 0.77:0.62:<br>0.93:2.21:<br>1.49:1.00 | 3.24E+07 | 6.57E+07 | 0.49:1.00             | 52962     | PREDICTED: UDP-glucose 6-dehydrogenase 1 [Vitis vinifera]                                                |
| 725        | 836        | gi731401656 | 70.96                 | 14           | 2         | 2       | 4.27E+07      | 3.21E+07      | 2.85E+07      | 8.71E+07       | 6.76E+07       | 5.43E+07       | 0.79:0.59:<br>0.52:1.60:<br>1.24:1.00 | 3.45E+07 | 6.97E+07 | 0.49:1.00             | 25978     | PREDICTED: proteasome subunit alpha type-5 [Vitis vinifera]                                              |

|      |       |              |       |    |   |   |          |          |          |          |          |          |                                       |          |          |           |       |                                                                                                            |
|------|-------|--------------|-------|----|---|---|----------|----------|----------|----------|----------|----------|---------------------------------------|----------|----------|-----------|-------|------------------------------------------------------------------------------------------------------------|
| 254  | 223   | gi 224109060 | 67.4  | 11 | 3 | 1 | 1.97E+07 | 1.36E+07 | 1.01E+07 | 8.56E+07 | 3.98E+07 | 2.70E+07 | 0.73:0.50:<br>0.37:3.16:<br>1.47:1.00 | 1.45E+07 | 5.08E+07 | 0.28:1.00 | 50212 | PHOSPHOGLYCERAT<br>E KINASE 1 family<br>protein [Populus<br>trichocarpa]                                   |
| 805  | 1639  | gi 566242200 | 66.35 | 9  | 1 | 1 | 7.46E+08 | 6.43E+08 | 5.79E+08 | 2.09E+09 | 1.25E+09 | 1.04E+09 | 0.71:0.62:<br>0.55:2.01:<br>1.20:1.00 | 6.56E+08 | 1.38E+09 | 0.47:1.00 | 19093 | hypothetical protein<br>POPTR_0019s12370g<br>partial [Populus<br>trichocarpa]                              |
| 124  | 477   | gi 224065861 | 65.3  | 44 | 6 | 2 | 2.05E+08 | 1.36E+07 | 1.42E+07 | 5.93E+08 | 4.12E+08 | 3.52E+08 | 0.58:0.04:<br>0.04:1.68:<br>1.17:1.00 | 8.57E+07 | 4.52E+08 | 0.19:1.00 | 18243 | Peptidyl-prolyl cis-trans<br>isomerase family protein<br>[Populus trichocarpa]                             |
| 940  | 1517  | gi 359494079 | 64.86 | 2  | 1 | 1 | 1.63E+07 | 1.38E+07 | 1.22E+07 | 3.51E+07 | 3.07E+07 | 1.89E+07 | 0.86:0.73:<br>0.65:1.86:<br>1.63:1.00 | 1.41E+07 | 2.82E+07 | 0.50:1.00 | 65102 | PREDICTED: LOW<br>QUALITY PROTEIN:<br>65-kDa microtubule-<br>associated protein 1-like<br>[Vitis vinifera] |
| 2406 | 2285  | gi 731426021 | 63.53 | 30 | 2 | 1 | 1.54E+07 | 1.10E+07 | 7.96E+06 | 5.79E+07 | 3.61E+07 | 2.46E+07 | 0.63:0.45:<br>0.32:2.35:<br>1.46:1.00 | 1.14E+07 | 3.95E+07 | 0.29:1.00 | 12464 | PREDICTED: protein<br>SPIRAL1-like 1 isoform<br>X2 [Vitis vinifera]                                        |
| 1827 | 2316  | gi 526118093 | 63.02 | 8  | 1 | 1 | 2.33E+07 | 2.43E+07 | 2.01E+07 | 6.33E+07 | 4.27E+07 | 3.25E+07 | 0.72:0.75:<br>0.62:1.95:<br>1.31:1.00 | 2.25E+07 | 4.62E+07 | 0.49:1.00 | 22511 | type II peroxiredoxin E<br>[Vitis vinifera]                                                                |
| 2407 | 2582  | gi 731407226 | 62.96 | 5  | 1 | 1 | 8.98E+06 | 8.39E+06 | 5.45E+06 | 4.03E+07 | 2.11E+07 | 1.79E+07 | 0.50:0.47:<br>0.30:2.25:<br>1.18:1.00 | 7.61E+06 | 2.65E+07 | 0.29:1.00 | 37934 | PREDICTED: 2-alkenal<br>reductase (NADP(+)-<br>dependent) [Vitis<br>vinifera]                              |
| 605  | 697   | gi 225426753 | 62.88 | 4  | 2 | 1 | 2.74E+07 | 1.79E+07 | 1.53E+07 | 7.33E+07 | 4.65E+07 | 4.18E+07 | 0.65:0.43:<br>0.37:1.75:<br>1.11:1.00 | 2.02E+07 | 5.39E+07 | 0.37:1.00 | 81719 | PREDICTED: primary<br>amine oxidase [Vitis<br>vinifera]                                                    |
| 2600 | 54896 | gi 224070184 | 62.45 | 11 | 1 | 1 | 7.12E+06 | 5.65E+06 | 4.38E+06 | 3.04E+07 | 1.60E+07 | 1.20E+07 | 0.59:0.47:<br>0.37:2.54:<br>1.34:1.00 | 5.72E+06 | 1.95E+07 | 0.29:1.00 | 18056 | deoxyuridine 5'-<br>triphosphate<br>nucleotidohydrolase<br>family protein [Populus<br>trichocarpa]         |
| 714  | 2170  | gi 225455784 | 62.44 | 3  | 1 | 1 | 4.33E+07 | 4.73E+07 | 4.32E+07 | 1.73E+08 | 1.02E+08 | 7.53E+07 | 0.57:0.63:<br>0.57:2.30:<br>1.35:1.00 | 4.46E+07 | 1.17E+08 | 0.38:1.00 | 50558 | PREDICTED: enolase 1<br>chloroplastic [Vitis<br>vinifera]                                                  |
| 1743 | 37684 | gi 225451247 | 62.16 | 11 | 1 | 1 | 2.50E+07 | 1.75E+07 | 1.69E+07 | 1.13E+08 | 5.15E+07 | 6.64E+07 | 0.38:0.26:<br>0.25:1.70:<br>0.78:1.00 | 1.98E+07 | 7.70E+07 | 0.26:1.00 | 15707 | PREDICTED: 40S<br>ribosomal protein S24-1<br>[Vitis vinifera]                                              |
| 1406 | 1863  | gi 225448367 | 62.08 | 4  | 1 | 1 | 8.04E+07 | 6.96E+07 | 6.21E+07 | 1.99E+08 | 1.27E+08 | 1.06E+08 | 0.76:0.66:<br>0.58:1.88:<br>1.20:1.00 | 7.07E+07 | 1.44E+08 | 0.49:1.00 | 34281 | PREDICTED: 60S acidic<br>ribosomal protein P0<br>[Vitis vinifera]                                          |
| 2462 | 45857 | gi 225448536 | 60.22 | 4  | 1 | 1 | 1.35E+07 | 1.07E+07 | 8.09E+06 | 4.02E+07 | 2.45E+07 | 1.76E+07 | 0.77:0.61:<br>0.46:2.29:<br>1.39:1.00 | 1.08E+07 | 2.74E+07 | 0.39:1.00 | 38803 | PREDICTED:<br>eukaryotic translation<br>initiation factor 2 subunit<br>alpha [Vitis vinifera]              |
| 2010 | 45804 | gi 225449234 | 60.09 | 16 | 1 | 1 | 1.11E+07 | 1.06E+07 | 7.11E+06 | 2.70E+07 | 2.48E+07 | 2.12E+07 | 0.52:0.50:<br>0.34:1.27:<br>1.17:1.00 | 9.60E+06 | 2.44E+07 | 0.39:1.00 | 12856 | PREDICTED: 60S<br>ribosomal protein L35a-1<br>[Vitis vinifera]                                             |
| 939  | 1418  | gi 359485890 | 60    | 1  | 1 | 1 | 1.28E+07 | 1.66E+07 | 1.71E+07 | 2.35E+06 | 6.30E+06 | 7.71E+06 | 1.66:2.15:<br>2.22:0.31:<br>0.82:1.00 | 1.55E+07 | 5.46E+06 | 2.84:1.00 | 83365 | PREDICTED: beta-<br>xylosidase/alpha-L-<br>arabinofuranosidase 2-<br>like [Vitis vinifera]                 |
| 1732 | 7561  | gi 225447707 | 60    | 6  | 1 | 1 | 1.75E+07 | 1.53E+07 | 1.21E+07 | 6.80E+07 | 3.82E+07 | 2.71E+07 | 0.64:0.57:<br>0.45:2.51:<br>1.41:1.00 | 1.50E+07 | 4.45E+07 | 0.34:1.00 | 27098 | PREDICTED:<br>uncharacterized protein<br>LOC100263170 [Vitis<br>vinifera]                                  |

|      |       |              |       |    |   |   |          |          |          |          |          |          |                                       |          |          |           |        |                                                                                                       |
|------|-------|--------------|-------|----|---|---|----------|----------|----------|----------|----------|----------|---------------------------------------|----------|----------|-----------|--------|-------------------------------------------------------------------------------------------------------|
| 1851 | 63948 | gij566205838 | 60    | 2  | 1 | 1 | 7.21E+06 | 5.55E+06 | 4.07E+06 | 2.62E+07 | 1.41E+07 | 1.12E+07 | 0.64:0.49:<br>0.36:2.34:<br>1.26:1.00 | 5.61E+06 | 1.72E+07 | 0.33:1.00 | 130678 | hypothetical protein<br>POPTR_0015s04720g<br>[Populus trichocarpa]                                    |
| 2725 | 3095  | gij526117629 | 60    | 8  | 1 | 1 | 1.74E+08 | 2.29E+08 | 3.02E+08 | 3.87E+07 | 9.72E+07 | 1.39E+08 | 1.25:1.64:<br>2.17:0.28:<br>0.70:1.00 | 2.35E+08 | 9.17E+07 | 2.56:1.00 | 11686  | lipid transfer protein<br>precursor [Vitis vinifera]                                                  |
| 2742 | 7736  | gij566167359 | 60    | 4  | 1 | 1 | 2.01E+07 | 1.95E+07 | 2.06E+07 | 4.72E+06 | 8.23E+06 | 9.77E+06 | 2.06:1.99:<br>2.11:0.48:<br>0.84:1.00 | 2.01E+07 | 7.57E+06 | 2.65:1.00 | 15952  | hypothetical protein<br>POPTR_0004s19310g<br>[Populus trichocarpa]                                    |
| 596  | 798   | gij566167040 | 60    | 15 | 3 | 1 | 1.02E+08 | 7.22E+07 | 6.05E+07 | 2.60E+08 | 1.82E+08 | 1.37E+08 | 0.74:0.53:<br>2.11:0.48:<br>1.34:1.00 | 7.81E+07 | 1.93E+08 | 0.40:1.00 | 33502  | hypothetical protein<br>POPTR_0004s17530g<br>[Populus trichocarpa]                                    |
| 2664 | 46648 | gij225428420 | 60    | 9  | 1 | 1 | 2.15E+07 | 1.32E+07 | 1.30E+07 | 4.24E+07 | 4.45E+07 | 3.93E+07 | 0.55:0.33:<br>0.33:1.08:<br>1.13:1.00 | 1.59E+07 | 4.21E+07 | 0.38:1.00 | 12203  | PREDICTED: 40S<br>ribosomal protein S25-2<br>[Vitis vinifera]                                         |
| 689  | 582   | gij225439064 | 59.65 | 8  | 3 | 3 | 4.52E+07 | 3.94E+07 | 2.47E+07 | 9.78E+07 | 8.24E+07 | 6.29E+07 | 0.72:0.63:<br>0.39:1.55:<br>1.31:1.00 | 3.64E+07 | 8.09E+07 | 0.45:1.00 | 61092  | PREDICTED: 2 3-<br>bisphosphoglycerate-<br>independent<br>phosphoglycerate mutase<br>[Vitis vinifera] |
| 1454 | 22432 | gij224104913 | 59.54 | 14 | 1 | 1 | 2.56E+07 | 2.98E+07 | 2.61E+07 | 8.61E+07 | 6.23E+07 | 4.41E+07 | 0.58:0.68:<br>0.59:1.95:<br>1.41:1.00 | 2.76E+07 | 6.42E+07 | 0.43:1.00 | 12354  | 60S ribosomal protein<br>L30 [Populus<br>trichocarpa]                                                 |
| 2727 | 3143  | gij225443988 | 59.1  | 7  | 1 | 1 | 3.82E+07 | 4.94E+07 | 4.59E+07 | 0        | 1.71E+07 | 2.07E+07 | 1.85:2.39:<br>2.22:0.8<br>3:1.00      | 4.45E+07 | 1.26E+07 | 3.53:1.00 | 13228  | PREDICTED:<br>photosystem I reaction<br>center subunit psaK<br>chloroplast [Vitis<br>vinifera]        |
| 299  | 532   | gij671743315 | 58    | 8  | 4 | 4 | 2.41E+08 | 2.18E+08 | 2.03E+08 | 8.16E+07 | 7.98E+07 | 7.44E+07 | 3.24:2.93:<br>2.73:1.10:<br>1.07:1.00 | 2.20E+08 | 7.86E+07 | 2.81:1.00 | 51822  | photosystem II CP43<br>chlorophyll apoprotein<br>(chloroplast) [Camellia<br>pubicosta]                |
| 48   | 96    | gij225426230 | 57.98 | 9  | 5 | 1 | 1.10E+08 | 8.94E+07 | 8.37E+07 | 2.16E+08 | 1.69E+08 | 1.13E+08 | 0.97:0.79:<br>0.74:1.91:<br>1.49:1.00 | 9.42E+07 | 1.66E+08 | 0.57:1.00 | 73581  | PREDICTED: luminal-<br>binding protein 5 [Vitis<br>vinifera]                                          |
| 767  | 1058  | gij526117441 | 57.27 | 2  | 1 | 1 | 1.24E+07 | 1.10E+07 | 9.89E+06 | 2.40E+07 | 1.85E+07 | 1.55E+07 | 0.80:0.71:<br>0.64:1.55:<br>1.19:1.00 | 1.11E+07 | 1.93E+07 | 0.57:1.00 | 101670 | lipoxygenase [Vitis<br>vinifera]                                                                      |
| 2726 | 3102  | gij566186111 | 57.18 | 8  | 1 | 1 | 1.08E+08 | 1.40E+08 | 1.34E+08 | 5.15E+06 | 1.51E+07 | 5.78E+07 | 1.87:2.41:<br>2.31:0.09:<br>0.26:1.00 | 1.27E+08 | 2.60E+07 | 4.88:1.00 | 12191  | hypothetical protein<br>POPTR_0009s03520g<br>partial [Populus<br>trichocarpa]                         |
| 1569 | 1877  | gij224078584 | 57.12 | 5  | 1 | 1 | 6.90E+07 | 5.56E+07 | 4.80E+07 | 1.78E+08 | 9.05E+07 | 7.36E+07 | 0.94:0.76:<br>0.65:2.42:<br>1.23:1.00 | 5.75E+07 | 1.14E+08 | 0.50:1.00 | 33150  | glyoxalase I homolog<br>family protein [Populus<br>trichocarpa]                                       |
| 693  | 1064  | gij566192956 | 56.77 | 3  | 1 | 1 | 2.31E+07 | 2.03E+07 | 1.75E+07 | 7.34E+07 | 4.39E+07 | 3.12E+07 | 0.74:0.65:<br>0.56:2.35:<br>1.41:1.00 | 2.03E+07 | 4.95E+07 | 0.41:1.00 | 44225  | hypothetical protein<br>POPTR_0011s00650g<br>[Populus trichocarpa]                                    |
| 1722 | 2034  | gij225452270 | 56.05 | 4  | 1 | 1 | 3.32E+07 | 2.68E+07 | 2.41E+07 | 6.84E+07 | 5.65E+07 | 4.74E+07 | 0.70:0.57:<br>0.51:1.45:<br>1.19:1.00 | 2.80E+07 | 5.74E+07 | 0.49:1.00 | 34598  | PREDICTED: 28 kDa<br>ribonucleoprotein<br>chloroplastic-like [Vitis<br>vinifera]                      |
| 90   | 172   | gij566196410 | 55.93 | 12 | 6 | 2 | 4.76E+07 | 3.89E+07 | 3.05E+07 | 1.50E+08 | 7.21E+07 | 5.38E+07 | 0.88:0.72:<br>0.57:2.79:<br>1.34:1.00 | 3.90E+07 | 8.46E+07 | 0.46:1.00 | 73406  | BIP isoform A family<br>protein [Populus<br>trichocarpa]                                              |
| 1614 | 1236  | gij225460542 | 55.57 | 5  | 1 | 1 | 5.03E+07 | 4.00E+07 | 3.12E+07 | 1.22E+08 | 7.68E+07 | 5.95E+07 | 0.85:0.67:<br>0.53:2.05:<br>1.29:1.00 | 4.05E+07 | 8.61E+07 | 0.47:1.00 | 36331  | PREDICTED:<br>heterogeneous nuclear<br>ribonucleoprotein 1<br>[Vitis vinifera]                        |

|      |       |              |       |    |   |   |          |          |          |          |          |          |                                       |          |          |           |        |                                                                                           |
|------|-------|--------------|-------|----|---|---|----------|----------|----------|----------|----------|----------|---------------------------------------|----------|----------|-----------|--------|-------------------------------------------------------------------------------------------|
| 764  | 808   | gi 731376167 | 55.13 | 19 | 3 | 2 | 4.03E+07 | 3.53E+07 | 3.10E+07 | 7.25E+07 | 6.42E+07 | 4.75E+07 | 0.85:0.74:<br>0.65:1.53:<br>1.35:1.00 | 3.55E+07 | 6.14E+07 | 0.58:1.00 | 29267  | PREDICTED:<br>proteasome subunit beta<br>type-5 [Vitis vinifera]                          |
| 720  | 990   | gi 225461156 | 55.07 | 39 | 2 | 1 | 1.05E+08 | 6.57E+07 | 1.30E+07 | 3.30E+08 | 1.72E+08 | 1.10E+08 | 0.96:0.60:<br>0.12:3.01:<br>1.57:1.00 | 5.58E+07 | 2.04E+08 | 0.27:1.00 | 13980  | PREDICTED: probable<br>histone H2A.2 [Vitis<br>vinifera]                                  |
| 1689 | 14744 | gi 225434277 | 54.76 | 4  | 1 | 1 | 1.83E+07 | 7.08E+06 | 7.89E+06 | 2.26E+07 | 2.74E+07 | 2.68E+07 | 0.68:0.26:<br>0.29:0.84:<br>1.02:1.00 | 1.11E+07 | 2.56E+07 | 0.43:1.00 | 22623  | PREDICTED: CBS<br>domain-containing<br>protein CBSX3<br>mitochondrial [Vitis<br>vinifera] |
| 847  | 747   | gi 224114826 | 53.62 | 12 | 1 | 1 | 1.79E+07 | 1.54E+07 | 1.42E+07 | 6.53E+07 | 4.18E+07 | 2.81E+07 | 0.64:0.55:<br>0.51:2.32:<br>1.49:1.00 | 1.59E+07 | 4.51E+07 | 0.35:1.00 | 17193  | ubiquitin-conjugating<br>enzyme family protein<br>[Populus trichocarpa]                   |
| 762  | 23720 | gi 566254838 | 53.5  | 5  | 1 | 1 | 3.29E+07 | 2.32E+07 | 2.02E+07 | 5.88E+07 | 5.98E+07 | 5.09E+07 | 0.65:0.45:<br>0.40:1.16:<br>1.18:1.00 | 2.54E+07 | 5.65E+07 | 0.45:1.00 | 28211  | hypothetical protein<br>POPTR_0789s00200g<br>[Populus trichocarpa]                        |
| 67   | 33    | gi 566225321 | 53.26 | 40 | 9 | 1 | 3.52E+08 | 3.40E+08 | 3.47E+08 | 6.68E+08 | 5.03E+08 | 4.27E+08 | 0.82:0.80:<br>0.81:1.56:<br>1.18:1.00 | 3.46E+08 | 5.32E+08 | 0.65:1.00 | 41712  | actin family protein<br>[Populus trichocarpa]                                             |
| 2440 | 22430 | gi 224084852 | 53.06 | 15 | 1 | 1 | 2.45E+07 | 1.86E+07 | 1.38E+07 | 6.93E+07 | 4.39E+07 | 3.04E+07 | 0.81:0.61:<br>0.46:2.28:<br>1.45:1.00 | 1.90E+07 | 4.79E+07 | 0.40:1.00 | 10061  | hypothetical protein<br>POPTR_0005s16040g<br>[Populus trichocarpa]                        |
| 987  | 2038  | gi 225457458 | 53.06 | 18 | 3 | 3 | 1.47E+07 | 8.26E+06 | 1.60E+07 | 5.16E+07 | 2.66E+07 | 1.76E+07 | 0.83:0.47:<br>0.91:2.93:<br>1.51:1.00 | 1.36E+07 | 3.20E+07 | 0.42:1.00 | 17173  | PREDICTED:<br>transcription factor BTF3<br>homolog 4 [Vitis<br>vinifera]                  |
| 397  | 3846  | gi 224143423 | 52.43 | 1  | 1 | 1 | 1.40E+07 | 1.02E+07 | 7.58E+06 | 6.60E+07 | 1.95E+07 | 1.63E+07 | 0.85:0.63:<br>0.46:4.04:<br>1.20:1.00 | 1.06E+07 | 2.75E+07 | 0.38:1.00 | 105985 | putative coater beta<br>subunit family protein<br>[Populus trichocarpa]                   |
| 2436 | 22188 | gi 526118000 | 52.15 | 6  | 1 | 1 | 8.10E+06 | 6.09E+06 | 5.15E+06 | 2.30E+07 | 1.59E+07 | 9.63E+06 | 0.84:0.63:<br>0.53:2.39:<br>1.65:1.00 | 6.45E+06 | 1.62E+07 | 0.40:1.00 | 22732  | germin-like protein 2<br>precursor [Vitis vinifera]                                       |
| 2317 | 3104  | gi 225439775 | 51.91 | 4  | 1 | 1 | 1.31E+08 | 1.15E+08 | 1.02E+08 | 2.65E+08 | 2.10E+08 | 1.61E+08 | 0.82:0.72:<br>0.64:1.65:<br>1.31:1.00 | 1.16E+08 | 2.12E+08 | 0.55:1.00 | 27055  | PREDICTED:<br>glutathione S-transferase<br>L3-like [Vitis vinifera]                       |
| 2542 | 3188  | gi 566189043 | 50.93 | 4  | 1 | 1 | 8.66E+07 | 6.87E+07 | 4.86E+07 | 1.93E+08 | 1.54E+08 | 1.04E+08 | 0.83:0.66:<br>0.47:1.85:<br>1.49:1.00 | 6.79E+07 | 1.50E+08 | 0.45:1.00 | 36173  | Peroxidase 6 precursor<br>family protein [Populus<br>trichocarpa]                         |
| 38   | 106   | gi 224094244 | 50.84 | 12 | 7 | 2 | 3.76E+07 | 3.14E+07 | 2.68E+07 | 2.43E+08 | 2.15E+08 | 4.36E+07 | 0.86:0.72:<br>0.61:5.58:<br>4.93:1.00 | 3.19E+07 | 1.67E+08 | 0.19:1.00 | 93953  | elongation factor 2<br>family protein [Populus<br>trichocarpa]                            |
| 2644 | 46034 | gi 731411254 | 50.13 | 5  | 1 | 1 | 1.72E+07 | 2.08E+07 | 1.96E+07 | 5.25E+06 | 7.07E+06 | 1.10E+07 | 1.57:1.90:<br>1.79:0.48:<br>0.65:1.00 | 1.92E+07 | 7.76E+06 | 2.47:1.00 | 21305  | PREDICTED: 22.0 kDa<br>class IV heat shock<br>protein-like [Vitis<br>vinifera]            |
| 520  | 629   | gi 224083020 | 49.72 | 24 | 3 | 1 | 3.71E+07 | 3.08E+07 | 2.34E+07 | 1.20E+08 | 9.50E+07 | 5.54E+07 | 0.67:0.56:<br>0.42:2.16:<br>1.71:1.00 | 3.04E+07 | 9.01E+07 | 0.34:1.00 | 18138  | Peptidyl-prolyl cis-trans<br>isomerase family protein<br>[Populus trichocarpa]            |
| 543  | 965   | gi 566210666 | 49.71 | 5  | 1 | 1 | 1.10E+07 | 1.05E+07 | 7.68E+06 | 3.90E+07 | 2.21E+07 | 1.57E+07 | 0.70:0.67:<br>0.49:2.49:<br>1.41:1.00 | 9.73E+06 | 2.56E+07 | 0.38:1.00 | 51605  | hypothetical protein<br>POPTR_0017s01390g<br>[Populus trichocarpa]                        |
| 1318 | 14637 | gi 566183513 | 49.27 | 6  | 3 | 2 | 4.53E+07 | 3.65E+07 | 2.98E+07 | 1.04E+08 | 7.87E+07 | 5.51E+07 | 0.82:0.66:<br>0.54:1.89:<br>1.43:1.00 | 3.72E+07 | 7.93E+07 | 0.47:1.00 | 62808  | hypothetical protein<br>POPTR_0008s11770g<br>[Populus trichocarpa]                        |
| 2179 | 3088  | gi 566150510 | 49.02 | 6  | 1 | 1 | 2.00E+07 | 2.21E+07 | 2.14E+07 | 5.32E+07 | 5.29E+07 | 4.28E+07 | 0.47:0.52:<br>0.50:1.24:<br>1.24:1.00 | 2.12E+07 | 4.96E+07 | 0.43:1.00 | 24081  | elongation factor 1B<br>alpha-subunit 2 family<br>protein [Populus<br>trichocarpa]        |

|      |       |              |       |    |   |   |          |          |          |          |          |          |                                       |          |          |           |        |                                                                                                                                      |
|------|-------|--------------|-------|----|---|---|----------|----------|----------|----------|----------|----------|---------------------------------------|----------|----------|-----------|--------|--------------------------------------------------------------------------------------------------------------------------------------|
| 110  | 111   | gi 225456079 | 48.99 | 20 | 8 | 2 | 8.92E+07 | 7.13E+07 | 7.41E+07 | 1.53E+08 | 1.26E+08 | 9.39E+07 | 0.95:0.76:<br>0.79:1.63:<br>1.34:1.00 | 7.87E+07 | 1.24E+08 | 0.63:1.00 | 59180  | PREDICTED: ATP synthase subunit beta mitochondrial-like [Vitis vinifera]                                                             |
| 1683 | 3310  | gi 671743260 | 48.29 | 4  | 1 | 1 | 3.01E+07 | 2.75E+07 | 2.95E+07 | 9.30E+06 | 6.70E+06 | 7.19E+06 | 4.19:3.83:<br>4.10:1.29:<br>0.93:1.00 | 2.90E+07 | 7.53E+06 | 3.85:1.00 | 24165  | cytochrome b6 (chloroplast) [Camellia petalotii]                                                                                     |
| 332  | 734   | gi 225430619 | 48.07 | 19 | 3 | 3 | 1.76E+08 | 1.65E+08 | 8.91E+07 | 3.41E+08 | 2.22E+08 | 2.19E+08 | 0.80:0.75:<br>0.41:1.56:<br>1.01:1.00 | 1.43E+08 | 2.61E+08 | 0.55:1.00 | 22781  | PREDICTED: 40S ribosomal protein S5 [Vitis vinifera]                                                                                 |
| 2533 | 2967  | gi 224112341 | 47.56 | 3  | 1 | 1 | 2.59E+07 | 2.27E+07 | 1.82E+07 | 6.22E+07 | 4.32E+07 | 2.87E+07 | 0.90:0.79:<br>0.63:2.16:<br>1.50:1.00 | 2.23E+07 | 4.47E+07 | 0.50:1.00 | 46306  | latex abundant family protein [Populus trichocarpa]                                                                                  |
| 1720 | 1958  | gi 224073967 | 47    | 12 | 2 | 2 | 1.49E+08 | 1.30E+08 | 1.16E+08 | 8.36E+07 | 7.09E+07 | 7.05E+07 | 2.11:1.85:<br>1.65:1.18:<br>1.01:1.00 | 1.32E+08 | 7.50E+07 | 1.76:1.00 | 15188  | photosystem I 11K family protein [Populus trichocarpa]                                                                               |
| 1262 | 1674  | gi 225460716 | 46    | 6  | 2 | 1 | 3.22E+06 | 3.33E+06 | 1.76E+06 | 1.04E+07 | 5.68E+06 | 4.27E+06 | 0.75:0.78:<br>0.41:2.44:<br>1.33:1.00 | 2.77E+06 | 6.80E+06 | 0.41:1.00 | 49588  | PREDICTED: dihydrolipoylysine-residue acetyltransferase component 5 of pyruvate dehydrogenase complex chloroplastic [Vitis vinifera] |
| 253  | 1055  | gi 225431871 | 45.83 | 3  | 1 | 1 | 7.74E+06 | 3.79E+06 | 3.22E+06 | 3.83E+07 | 2.08E+07 | 1.23E+07 | 0.63:0.31:<br>0.26:3.11:<br>1.69:1.00 | 4.92E+06 | 2.38E+07 | 0.21:1.00 | 58138  | PREDICTED: importin subunit alpha-1 isoform X1 [Vitis vinifera]                                                                      |
| 2077 | 45601 | gi 566183164 | 45.77 | 19 | 2 | 1 | 5.54E+07 | 4.40E+07 | 3.77E+07 | 1.32E+08 | 1.01E+08 | 7.93E+07 | 0.70:0.55:<br>0.48:1.67:<br>1.27:1.00 | 4.57E+07 | 1.04E+08 | 0.44:1.00 | 19589  | hypothetical protein POPTR_0008s09660g [Populus trichocarpa]                                                                         |
| 1800 | 1939  | gi 566174518 | 45.72 | 7  | 1 | 1 | 2.94E+07 | 1.88E+07 | 8.02E+06 | 8.18E+07 | 4.91E+07 | 3.82E+07 | 0.77:0.49:<br>0.21:2.14:<br>1.28:1.00 | 1.88E+07 | 5.64E+07 | 0.33:1.00 | 40168  | hypothetical protein POPTR_0006s04880g [Populus trichocarpa]                                                                         |
| 562  | 939   | gi 566206623 | 45.61 | 8  | 3 | 1 | 1.07E+07 | 8.31E+06 | 8.45E+06 | 3.90E+07 | 2.43E+07 | 1.63E+07 | 0.66:0.51:<br>0.52:2.39:<br>1.49:1.00 | 9.16E+06 | 2.66E+07 | 0.35:1.00 | 54072  | aldehyde dehydrogenase 1 precursor family protein [Populus trichocarpa]                                                              |
| 2592 | 46154 | gi 359496589 | 45.05 | 3  | 1 | 1 | 2.22E+07 | 2.22E+07 | 1.90E+07 | 3.26E+07 | 4.15E+07 | 3.64E+07 | 0.61:0.61:<br>0.52:0.89:<br>1.14:1.00 | 2.11E+07 | 3.68E+07 | 0.57:1.00 | 41483  | PREDICTED: clathrin light chain 1 [Vitis vinifera]                                                                                   |
| 674  | 764   | gi 225441754 | 45.03 | 8  | 3 | 1 | 4.13E+07 | 8.97E+06 | 9.40E+06 | 9.00E+07 | 6.23E+07 | 5.20E+07 | 0.79:0.17:<br>0.18:1.73:<br>1.20:1.00 | 1.99E+07 | 6.81E+07 | 0.29:1.00 | 53382  | PREDICTED: adenylosuccinate synthetase 2 chloroplastic [Vitis vinifera]                                                              |
| 167  | 29851 | gi 526117645 | 44.91 | 1  | 1 | 1 | 6.69E+06 | 3.50E+06 | 2.81E+06 | 1.78E+07 | 1.41E+07 | 9.09E+06 | 0.74:0.39:<br>0.31:1.95:<br>1.55:1.00 | 4.33E+06 | 1.37E+07 | 0.32:1.00 | 153182 | magnesium chelatase H subunit [Vitis vinifera]                                                                                       |
| 483  | 559   | gi 552540866 | 44.07 | 4  | 1 | 1 | 3.87E+07 | 3.35E+07 | 2.95E+07 | 2.26E+07 | 1.68E+07 | 1.22E+07 | 3.18:2.76:<br>2.43:1.86:<br>1.38:1.00 | 3.39E+07 | 1.72E+07 | 1.98:1.00 | 35220  | cytochrome f (chloroplast) [Camellia danzaiensis]                                                                                    |
| 108  | 117   | gi 566146990 | 43.81 | 9  | 7 | 1 | 8.28E+07 | 6.63E+07 | 5.69E+07 | 1.80E+08 | 1.14E+08 | 9.25E+07 | 0.90:0.72:<br>0.62:1.95:<br>1.23:1.00 | 6.87E+07 | 1.29E+08 | 0.53:1.00 | 71882  | heat shock protein 70 cognate [Populus trichocarpa]                                                                                  |
| 846  | 637   | gi 568244554 | 43.76 | 10 | 3 | 3 | 2.43E+08 | 2.04E+08 | 1.80E+08 | 1.25E+08 | 1.04E+08 | 8.15E+07 | 2.98:2.50:<br>2.21:1.53:<br>1.27:1.00 | 2.09E+08 | 1.03E+08 | 2.02:1.00 | 39549  | photosystem II protein D2 (plastid) [Camellia oleifera]                                                                              |
| 528  | 504   | gi 552540956 | 43.72 | 8  | 3 | 3 | 1.91E+08 | 2.94E+08 | 1.66E+08 | 8.63E+07 | 6.80E+07 | 7.11E+07 | 2.69:4.14:<br>2.34:1.21:<br>0.96:1.00 | 2.17E+08 | 7.51E+07 | 2.89:1.00 | 38951  | photosystem II Qb protein D1 (chloroplast) [Camellia impressinervis]                                                                 |



|      |       |              |       |    |   |   |          |          |          |          |          |          |                                       |          |          |           |        |                                                                                                  |
|------|-------|--------------|-------|----|---|---|----------|----------|----------|----------|----------|----------|---------------------------------------|----------|----------|-----------|--------|--------------------------------------------------------------------------------------------------|
| 431  | 1825  | gij225439231 | 43.39 | 5  | 2 | 1 | 3.77E+07 | 4.53E+07 | 2.45E+07 | 8.69E+07 | 6.23E+07 | 4.68E+07 | 0.81:0.97:<br>0.52:1.86:<br>1.33:1.00 | 3.58E+07 | 6.53E+07 | 0.55:1.00 | 55389  | PREDICTED: 3-isopropylmalate dehydratase large subunit-like [Vitis vinifera]                     |
| 2174 | 1659  | gij359475330 | 43.38 | 7  | 1 | 1 | 1.30E+08 | 1.16E+08 | 1.11E+08 | 1.85E+08 | 1.94E+08 | 1.78E+08 | 0.73:0.65:<br>0.62:1.04:<br>1.09:1.00 | 1.19E+08 | 1.86E+08 | 0.64:1.00 | 16329  | PREDICTED: glycine-rich RNA-binding protein GRP2A [Vitis vinifera]                               |
| 807  | 1995  | gij566149424 | 43.37 | 4  | 1 | 1 | 1.38E+07 | 1.06E+07 | 9.48E+06 | 4.08E+07 | 2.49E+07 | 1.81E+07 | 0.76:0.59:<br>0.52:2.25:<br>1.38:1.00 | 1.13E+07 | 2.80E+07 | 0.40:1.00 | 46427  | oligouridylate-binding family protein [Populus trichocarpa]                                      |
| 2617 | 2185  | gij566151403 | 42.94 | 20 | 1 | 1 | 3.00E+07 | 2.53E+07 | 2.63E+07 | 7.68E+07 | 6.42E+07 | 4.01E+07 | 0.75:0.63:<br>0.66:1.92:<br>1.60:1.00 | 2.72E+07 | 6.04E+07 | 0.45:1.00 | 8809   | hypothetical protein POPTR_0001s28090g [Populus trichocarpa]                                     |
| 680  | 1614  | gij225466690 | 42.91 | 8  | 2 | 1 | 1.51E+07 | 5.03E+06 | 4.51E+06 | 4.19E+07 | 3.06E+07 | 2.35E+07 | 0.64:0.21:<br>0.19:1.78:<br>1.30:1.00 | 8.21E+06 | 3.20E+07 | 0.26:1.00 | 42525  | PREDICTED: sedoheptulose-1,7-bisphosphatase chloroplastic [Vitis vinifera]                       |
| 1172 | 45437 | gij566149444 | 42.74 | 6  | 2 | 2 | 9.91E+06 | 7.24E+06 | 1.44E+07 | 3.95E+07 | 2.72E+07 | 2.20E+07 | 0.45:0.33:<br>0.65:1.79:<br>1.23:1.00 | 1.05E+07 | 2.96E+07 | 0.36:1.00 | 54813  | aldehyde dehydrogenase family 7 member a1 turgor responsive family protein [Populus trichocarpa] |
| 730  | 1587  | gij566213188 | 42.66 | 5  | 1 | 1 | 5.59E+06 | 4.32E+06 | 3.00E+06 | 3.51E+07 | 1.39E+07 | 8.64E+06 | 0.65:0.50:<br>0.35:4.06:<br>1.61:1.00 | 4.30E+06 | 1.92E+07 | 0.22:1.00 | 43893  | nodule-enhanced malate dehydrogenase family protein [Populus trichocarpa]                        |
| 682  | 2754  | gij225465837 | 42.52 | 6  | 1 | 1 | 5.26E+07 | 4.14E+07 | 3.27E+07 | 1.15E+08 | 8.32E+07 | 6.82E+07 | 0.77:0.61:<br>0.48:1.68:<br>1.22:1.00 | 4.22E+07 | 8.86E+07 | 0.48:1.00 | 46787  | PREDICTED: protein ASPARTIC PROTEASE IN GUARD CELL 2 [Vitis vinifera]                            |
| 2599 | 54893 | gij225457361 | 41.92 | 6  | 1 | 1 | 0        | 1.09E+07 | 8.79E+06 | 5.61E+07 | 3.05E+07 | 1.95E+07 | 0:0.56:0.4<br>5:2.88:1.5<br>6:1.00    | 6.55E+06 | 3.54E+07 | 0.19:1.00 | 29994  | PREDICTED: ribulose-phosphate 3-epimerase chloroplastic [Vitis vinifera]                         |
| 1231 | 3913  | gij731426684 | 41.8  | 1  | 1 | 1 | 3.91E+07 | 3.19E+07 | 2.90E+07 | 1.06E+08 | 7.32E+07 | 4.97E+07 | 0.79:0.64:<br>0.58:2.14:<br>1.47:1.00 | 3.34E+07 | 7.64E+07 | 0.44:1.00 | 144086 | PREDICTED: uncharacterized protein LOC100262718 isoform X4 [Vitis vinifera]                      |
| 810  | 22054 | gij566176147 | 41.02 | 4  | 2 | 1 | 2.34E+07 | 2.53E+07 | 2.15E+07 | 9.11E+06 | 1.67E+07 | 1.75E+07 | 1.34:1.45:<br>1.23:0.52:<br>0.96:1.00 | 2.34E+07 | 1.44E+07 | 1.62:1.00 | 41553  | hypothetical protein POPTR_0006s13470g [Populus trichocarpa]                                     |
| 683  | 3965  | gij224114720 | 40.89 | 7  | 2 | 2 | 1.44E+07 | 1.03E+07 | 7.63E+06 | 6.42E+07 | 4.27E+07 | 1.73E+07 | 0.84:0.60:<br>0.44:3.72:<br>2.48:1.00 | 1.08E+07 | 4.14E+07 | 0.26:1.00 | 45639  | Magnesium-chelatase subunit chII family protein [Populus trichocarpa]                            |
| 105  | 123   | gij224365668 | 40.75 | 7  | 3 | 3 | 1.70E+08 | 1.62E+08 | 1.45E+08 | 2.74E+08 | 2.48E+08 | 2.26E+08 | 0.75:0.72:<br>0.64:1.21:<br>1.10:1.00 | 1.59E+08 | 2.49E+08 | 0.64:1.00 | 55143  | ATPase subunit 1 (mitochondrion) [Vitis vinifera]                                                |
| 644  | 2151  | gij225444472 | 39.97 | 8  | 2 | 2 | 4.75E+07 | 3.48E+07 | 3.44E+07 | 7.10E+07 | 6.18E+07 | 6.48E+07 | 0.73:0.54:<br>0.53:1.10:<br>0.95:1.00 | 3.89E+07 | 6.59E+07 | 0.59:1.00 | 44306  | PREDICTED: aminomethyltransferase mitochondrial [Vitis vinifera]                                 |
| 785  | 2419  | gij224137032 | 39.74 | 1  | 1 | 1 | 2.55E+07 | 2.17E+07 | 1.70E+07 | 5.75E+07 | 4.42E+07 | 2.76E+07 | 0.92:0.78:<br>0.61:2.08:<br>1.60:1.00 | 2.14E+07 | 4.31E+07 | 0.50:1.00 | 147951 | subtilase family protein [Populus trichocarpa]                                                   |

|      |       |              |       |    |   |   |          |          |          |          |          |          |                                       |          |          |           |        |                                                                                      |
|------|-------|--------------|-------|----|---|---|----------|----------|----------|----------|----------|----------|---------------------------------------|----------|----------|-----------|--------|--------------------------------------------------------------------------------------|
| 2720 | 2669  | gi 224130034 | 39.66 | 2  | 1 | 1 | 1.75E+07 | 2.50E+07 | 2.26E+07 | 7.72E+06 | 1.53E+07 | 1.75E+07 | 1.00:1.43:<br>1.29:0.44:<br>0.88:1.00 | 2.17E+07 | 1.35E+07 | 1.61:1.00 | 43250  | Fasciclin-like arabinogalactan protein 8 precursor [Populus trichocarpa]             |
| 372  | 470   | gi 224109788 | 39.39 | 11 | 2 | 1 | 3.41E+07 | 3.38E+07 | 3.09E+07 | 1.13E+08 | 7.50E+07 | 5.13E+07 | 0.66:0.66:<br>0.60:2.21:<br>1.46:1.00 | 3.29E+07 | 7.99E+07 | 0.41:1.00 | 37547  | putative adenosine kinase family protein [Populus trichocarpa]                       |
| 1167 | 22126 | gi 731439997 | 39.19 | 4  | 1 | 1 | 2.33E+07 | 1.27E+07 | 1.54E+07 | 4.92E+07 | 3.87E+07 | 1.94E+07 | 1.20:0.65:<br>0.79:2.54:<br>2.00:1.00 | 1.71E+07 | 3.58E+07 | 0.48:1.00 | 33522  | PREDICTED: phosphoglycolate phosphatase 1B chloroplast [Vitis vinifera]              |
| 2310 | 2791  | gi 225440849 | 39.04 | 19 | 1 | 1 | 2.81E+07 | 1.94E+07 | 1.60E+07 | 6.00E+07 | 4.60E+07 | 3.48E+07 | 0.81:0.56:<br>0.46:1.72:<br>1.32:1.00 | 2.12E+07 | 4.69E+07 | 0.45:1.00 | 8952   | PREDICTED: probable small nuclear ribonucleoprotein G [Vitis vinifera]               |
| 2377 | 72648 | gi 566239233 | 38.98 | 2  | 1 | 1 | 2.06E+07 | 9.95E+06 | 1.88E+07 | 7.86E+07 | 3.38E+07 | 2.19E+07 | 0.94:0.46:<br>0.86:3.59:<br>1.55:1.00 | 1.65E+07 | 4.48E+07 | 0.37:1.00 | 94826  | aspartate kinase family protein [Populus trichocarpa]                                |
| 2467 | 46193 | gi 225435608 | 38.7  | 8  | 1 | 1 | 4.03E+07 | 0        | 0        | 4.46E+07 | 4.37E+07 | 6.05E+07 | 0.66:0:0:<br>.74:0.72:1<br>.00        | 1.34E+07 | 4.96E+07 | 0.27:1.00 | 31609  | PREDICTED: zinc finger CCCH domain-containing protein 14-like [Vitis vinifera]       |
| 374  | 825   | gi 225457957 | 38.3  | 34 | 4 | 1 | 1.11E+07 | 8.72E+06 | 8.55E+06 | 2.75E+07 | 2.12E+07 | 1.66E+07 | 0.67:0.53:<br>0.52:1.66:<br>1.28:1.00 | 9.46E+06 | 2.17E+07 | 0.43:1.00 | 17938  | PREDICTED: peptidyl-prolyl cis-trans isomerase [Vitis vinifera]                      |
| 1791 | 7321  | gi 566160631 | 38.26 | 2  | 1 | 1 | 1.25E+07 | 9.78E+06 | 6.93E+06 | 4.01E+07 | 2.07E+07 | 1.56E+07 | 0.80:0.63:<br>0.45:2.58:<br>1.33:1.00 | 9.73E+06 | 2.55E+07 | 0.38:1.00 | 73609  | endomembrane protein 70 [Populus trichocarpa]                                        |
| 1294 | 927   | gi 225444649 | 37.02 | 10 | 2 | 2 | 2.22E+08 | 2.19E+08 | 2.09E+08 | 4.01E+08 | 3.19E+08 | 2.66E+08 | 0.83:0.82:<br>0.78:1.51:<br>1.20:1.00 | 2.16E+08 | 3.28E+08 | 0.66:1.00 | 26396  | PREDICTED: 20 kDa chaperonin chloroplast [Vitis vinifera]                            |
| 1181 | 1032  | gi 225455934 | 36.92 | 12 | 3 | 1 | 2.19E+09 | 2.10E+09 | 1.91E+09 | 1.29E+09 | 1.23E+09 | 1.08E+09 | 2.03:1.95:<br>1.77:1.20:<br>1.15:1.00 | 2.06E+09 | 1.20E+09 | 1.72:1.00 | 20429  | PREDICTED: ribulose biphosphate carboxylase small chain chloroplast [Vitis vinifera] |
| 2247 | 22157 | gi 224124892 | 36.9  | 6  | 1 | 1 | 5.73E+07 | 5.11E+07 | 4.47E+07 | 1.29E+08 | 1.13E+08 | 9.43E+07 | 0.61:0.54:<br>0.47:1.37:<br>1.20:1.00 | 5.11E+07 | 1.12E+08 | 0.46:1.00 | 22641  | rhcadhesin receptor family protein [Populus trichocarpa]                             |
| 2137 | 7457  | gi 224109088 | 36.57 | 2  | 1 | 1 | 1.79E+07 | 1.81E+07 | 1.38E+07 | 3.94E+07 | 3.84E+07 | 2.60E+07 | 0.69:0.70:<br>0.53:1.52:<br>1.48:1.00 | 1.66E+07 | 3.46E+07 | 0.48:1.00 | 57503  | SUCCINIC SEMIALDEHYDE DEHYDROGENASE family protein [Populus trichocarpa]             |
| 549  | 1143  | gi 225430366 | 36.57 | 1  | 1 | 1 | 1.15E+07 | 8.72E+06 | 7.51E+06 | 2.59E+07 | 1.78E+07 | 1.28E+07 | 0.90:0.68:<br>0.59:2.02:<br>1.39:1.00 | 9.26E+06 | 1.89E+07 | 0.49:1.00 | 108100 | PREDICTED: chaperone protein ClpB4 mitochondrial [Vitis vinifera]                    |
| 114  | 128   | gi 224073124 | 36.52 | 11 | 4 | 1 | 2.17E+07 | 1.97E+07 | 1.58E+07 | 7.60E+07 | 2.89E+07 | 2.06E+07 | 1.05:0.96:<br>0.77:3.69:<br>1.40:1.00 | 1.91E+07 | 3.76E+07 | 0.51:1.00 | 64544  | chaperonin precursor family protein [Populus trichocarpa]                            |
| 1251 | 1523  | gi 566175251 | 36.42 | 5  | 2 | 2 | 5.67E+07 | 1.26E+07 | 9.28E+06 | 1.24E+08 | 2.20E+07 | 7.28E+07 | 0.78:0.17:<br>0.13:1.71:<br>0.30:1.00 | 2.62E+07 | 7.30E+07 | 0.36:1.00 | 34569  | hypothetical protein POPTR_0006s08710g [Populus trichocarpa]                         |

|      |       |              |       |    |   |   |          |          |          |          |          |          |                                       |          |          |           |       |                                                                                              |
|------|-------|--------------|-------|----|---|---|----------|----------|----------|----------|----------|----------|---------------------------------------|----------|----------|-----------|-------|----------------------------------------------------------------------------------------------|
| 347  | 468   | gi 225427917 | 36.33 | 9  | 2 | 1 | 9.86E+07 | 8.49E+07 | 7.89E+07 | 1.69E+08 | 1.40E+08 | 1.09E+08 | 0.90:0.78:<br>0.72:1.55:<br>1.28:1.00 | 8.75E+07 | 1.39E+08 | 0.63:1.00 | 34675 | PREDICTED: triosephosphate isomerase chloroplastic [Vitis vinifera]                          |
| 1557 | 1173  | gi 224131818 | 36.02 | 5  | 2 | 1 | 3.13E+08 | 3.11E+08 | 3.11E+08 | 1.52E+08 | 1.62E+08 | 1.46E+08 | 2.15:2.13:<br>2.13:1.04:<br>1.11:1.00 | 3.12E+08 | 1.54E+08 | 2.03:1.00 | 28513 | chlorophyll a/b-binding family protein [Populus trichocarpa]                                 |
| 2733 | 3734  | gi 359494267 | 35.73 | 3  | 1 | 1 | 3.67E+07 | 3.88E+07 | 3.86E+07 | 1.05E+07 | 2.15E+07 | 2.96E+07 | 1.24:1.31:<br>1.31:0.35:<br>0.73:1.00 | 3.81E+07 | 2.05E+07 | 1.86:1.00 | 25766 | PREDICTED: probable glutathione S-transferase [Vitis vinifera]                               |
| 2618 | 2762  | gi 225435002 | 35.69 | 6  | 1 | 1 | 8.38E+07 | 7.98E+07 | 7.38E+07 | 1.44E+08 | 1.31E+08 | 1.17E+08 | 0.72:0.68:<br>0.63:1.23:<br>1.12:1.00 | 7.91E+07 | 1.31E+08 | 0.61:1.00 | 27396 | PREDICTED: osmotin-like protein [Vitis vinifera]                                             |
| 2187 | 7497  | gi 566167266 | 34.75 | 4  | 1 | 1 | 2.03E+07 | 1.57E+07 | 1.26E+07 | 4.96E+07 | 2.97E+07 | 2.27E+07 | 0.89:0.69:<br>0.55:2.18:<br>1.31:1.00 | 1.62E+07 | 3.40E+07 | 0.48:1.00 | 37830 | hypothetical protein POPTR_0004s18610g [Populus trichocarpa]                                 |
| 2233 | 3166  | gi 566210985 | 34.74 | 3  | 1 | 1 | 9.57E+06 | 5.87E+06 | 5.20E+06 | 1.74E+07 | 1.46E+07 | 1.13E+07 | 0.85:0.52:<br>0.46:1.54:<br>1.30:1.00 | 6.88E+06 | 1.44E+07 | 0.48:1.00 | 51941 | glycosyl hydrolase family 17 protein [Populus trichocarpa]                                   |
| 170  | 353   | gi 359496771 | 34.29 | 8  | 4 | 1 | 1.01E+08 | 8.03E+07 | 4.21E+07 | 2.32E+08 | 9.80E+07 | 8.44E+07 | 1.19:0.95:<br>0.50:2.74:<br>1.16:1.00 | 7.44E+07 | 1.38E+08 | 0.54:1.00 | 73271 | PREDICTED: heat shock 70 kDa protein mitochondrial-like [Vitis vinifera]                     |
| 1343 | 15240 | gi 566170761 | 34.18 | 2  | 1 | 1 | 1.34E+07 | 1.71E+07 | 1.32E+07 | 3.52E+07 | 3.25E+07 | 2.67E+07 | 0.50:0.64:<br>0.49:1.32:<br>1.22:1.00 | 1.46E+07 | 3.15E+07 | 0.46:1.00 | 48329 | hypothetical protein POPTR_0005s11300g [Populus trichocarpa]                                 |
| 1957 | 1621  | gi 566168995 | 33.08 | 13 | 1 | 1 | 4.88E+07 | 2.56E+07 | 2.77E+07 | 1.07E+08 | 7.45E+07 | 5.28E+07 | 0.93:0.48:<br>0.53:2.04:<br>1.41:1.00 | 3.40E+07 | 7.82E+07 | 0.44:1.00 | 19031 | callus protein P23 [Populus trichocarpa]                                                     |
| 1290 | 17624 | gi 566195934 | 32.83 | 1  | 1 | 1 | 2.72E+07 | 2.35E+07 | 2.03E+07 | 5.03E+07 | 4.71E+07 | 3.32E+07 | 0.82:0.71:<br>0.61:1.51:<br>1.42:1.00 | 2.36E+07 | 4.35E+07 | 0.54:1.00 | 83449 | alkaline alpha galactosidase I family protein [Populus trichocarpa]                          |
| 157  | 168   | gi 359490179 | 32.76 | 2  | 1 | 1 | 1.38E+08 | 1.09E+08 | 1.09E+08 | 2.10E+08 | 2.08E+08 | 1.45E+08 | 0.96:0.76:<br>0.76:1.45:<br>1.44:1.00 | 1.19E+08 | 1.88E+08 | 0.63:1.00 | 78856 | PREDICTED: transketolase chloroplastic [Vitis vinifera]                                      |
| 829  | 855   | gi 225430650 | 32.36 | 3  | 1 | 1 | 1.26E+07 | 1.20E+07 | 1.10E+07 | 3.06E+07 | 2.43E+07 | 1.90E+07 | 0.66:0.64:<br>0.58:1.61:<br>1.28:1.00 | 1.19E+07 | 2.46E+07 | 0.48:1.00 | 43927 | PREDICTED: pyruvate dehydrogenase E1 component subunit beta-3 chloroplastic [Vitis vinifera] |
| 1296 | 1359  | gi 225429209 | 31.77 | 1  | 1 | 1 | 3.70E+07 | 4.20E+07 | 4.38E+07 | 3.35E+06 | 5.70E+06 | 2.60E+07 | 1.42:1.61:<br>1.68:0.13:<br>0.22:1.00 | 4.09E+07 | 1.17E+07 | 3.50:1.00 | 53142 | PREDICTED: serine carboxypeptidase-like 16 [Vitis vinifera]                                  |
| 415  | 585   | gi 566210462 | 31.55 | 2  | 1 | 1 | 2.91E+07 | 2.45E+07 | 2.08E+07 | 8.63E+07 | 3.93E+07 | 6.35E+07 | 0.46:0.39:<br>0.33:1.36:<br>0.62:1.00 | 2.48E+07 | 6.30E+07 | 0.39:1.00 | 67453 | Methylenetetrahydrofolate reductase family protein [Populus trichocarpa]                     |
| 942  | 1557  | gi 566178300 | 31.24 | 4  | 1 | 1 | 2.20E+07 | 2.31E+07 | 2.31E+07 | 5.73E+07 | 4.07E+07 | 3.30E+07 | 0.67:0.70:<br>0.70:1.74:<br>1.23:1.00 | 2.28E+07 | 4.36E+07 | 0.52:1.00 | 45519 | hypothetical protein POPTR_0006s26630g [Populus trichocarpa]                                 |
| 2562 | 2875  | gi 566184421 | 31.15 | 3  | 1 | 1 | 2.77E+07 | 1.77E+07 | 1.23E+07 | 4.51E+07 | 3.72E+07 | 2.15E+07 | 1.29:0.82:<br>0.57:2.10:<br>1.73:1.00 | 1.92E+07 | 3.46E+07 | 0.56:1.00 | 45388 | hypothetical protein POPTR_0008s17030g [Populus trichocarpa]                                 |
| 1491 | 2202  | gi 225447176 | 30.95 | 1  | 1 | 1 | 8.97E+06 | 1.15E+07 | 1.04E+07 | 1.93E+06 | 6.08E+06 | 5.43E+06 | 1.65:2.12:<br>1.91:0.36:<br>1.12:1.00 | 1.03E+07 | 4.48E+06 | 2.30:1.00 | 46608 | PREDICTED: protein disulfide isomerase-like 2-3 [Vitis vinifera]                             |

|      |       |              |       |    |   |   |          |          |          |          |          |          |                                       |          |          |           |       |                                                                                           |
|------|-------|--------------|-------|----|---|---|----------|----------|----------|----------|----------|----------|---------------------------------------|----------|----------|-----------|-------|-------------------------------------------------------------------------------------------|
| 2197 | 45734 | gi 225454123 | 30.79 | 7  | 1 | 1 | 1.08E+07 | 9.56E+06 | 6.95E+06 | 2.06E+07 | 1.70E+07 | 1.35E+07 | 0.80:0.71:<br>0.51:1.53:<br>1.26:1.00 | 9.10E+06 | 1.71E+07 | 0.53:1.00 | 22997 | PREDICTED: pre-mRNA cleavage factor Im 25 kDa subunit 2 [Vitis vinifera]                  |
| 590  | 1041  | gi 225447725 | 30.77 | 5  | 2 | 1 | 4.19E+07 | 3.40E+07 | 3.17E+07 | 6.73E+07 | 5.92E+07 | 5.31E+07 | 0.79:0.64:<br>0.60:1.27:<br>1.11:1.00 | 3.58E+07 | 5.99E+07 | 0.60:1.00 | 61438 | PREDICTED: calnexin homolog [Vitis vinifera]                                              |
| 1130 | 1545  | gi 224104631 | 30.49 | 4  | 1 | 1 | 2.84E+08 | 3.04E+08 | 3.01E+08 | 1.12E+08 | 1.86E+08 | 2.18E+08 | 1.30:1.39:<br>1.38:0.51:<br>0.86:1.00 | 2.96E+08 | 1.72E+08 | 1.72:1.00 | 27319 | cytosolic ascorbate peroxidase family protein [Populus trichocarpa]                       |
| 1567 | 1773  | gi 731436956 | 30.39 | 4  | 1 | 1 | 2.03E+07 | 1.39E+07 | 1.71E+07 | 2.79E+07 | 2.88E+07 | 2.21E+07 | 0.92:0.63:<br>0.78:1.26:<br>1.31:1.00 | 1.71E+07 | 2.63E+07 | 0.65:1.00 | 39713 | PREDICTED: porphobilinogen deaminase chloroplastic [Vitis vinifera]                       |
| 2235 | 3340  | gi 224109362 | 30.36 | 10 | 2 | 1 | 1.14E+07 | 7.62E+06 | 5.46E+06 | 4.05E+07 | 2.04E+07 | 1.85E+07 | 0.62:0.41:<br>0.29:2.18:<br>1.10:1.00 | 8.17E+06 | 2.65E+07 | 0.31:1.00 | 31536 | Eukaryotic translation initiation factor 3 subunit 5 family protein [Populus trichocarpa] |
| 615  | 3014  | gi 225443760 | 30.28 | 8  | 1 | 1 | 3.08E+07 | 2.48E+07 | 2.39E+07 | 5.87E+07 | 5.11E+07 | 4.00E+07 | 0.77:0.62:<br>0.60:1.47:<br>1.28:1.00 | 2.65E+07 | 4.99E+07 | 0.53:1.00 | 20875 | PREDICTED: 60S ribosomal protein L11-1-like [Vitis vinifera]                              |
| 609  | 1158  | gi 552540940 | 30.1  | 3  | 1 | 1 | 4.86E+07 | 4.42E+07 | 3.91E+07 | 7.58E+07 | 6.46E+07 | 5.77E+07 | 0.84:0.77:<br>0.68:1.31:<br>1.12:1.00 | 4.40E+07 | 6.60E+07 | 0.67:1.00 | 58361 | acetyl-CoA carboxylase carboxyl transferase beta (chloroplast) [Camellia impressinervis]  |
| 747  | 1691  | gi 224063997 | 29.97 | 6  | 3 | 1 | 3.58E+06 | 2.40E+06 | 9.78E+05 | 7.58E+06 | 7.53E+06 | 5.05E+06 | 0.71:0.47:<br>0.19:1.50:<br>1.49:1.00 | 2.32E+06 | 6.72E+06 | 0.34:1.00 | 67268 | NAD-dependent malic enzyme family protein [Populus trichocarpa]                           |
| 888  | 2264  | gi 225434133 | 29.75 | 7  | 2 | 1 | 5.61E+07 | 4.41E+07 | 3.70E+07 | 1.26E+08 | 1.00E+08 | 7.36E+07 | 0.76:0.60:<br>0.50:1.71:<br>1.36:1.00 | 4.57E+07 | 1.00E+08 | 0.46:1.00 | 40613 | PREDICTED: cysteine synthase chloroplastic/chromoplastic [Vitis vinifera]                 |
| 2301 | 2433  | gi 225458237 | 29.7  | 5  | 1 | 1 | 2.30E+07 | 2.46E+07 | 2.22E+07 | 4.21E+07 | 4.05E+07 | 3.66E+07 | 0.63:0.67:<br>0.61:1.15:<br>1.11:1.00 | 2.33E+07 | 3.98E+07 | 0.59:1.00 | 29571 | PREDICTED: gamma carbonic anhydrase 1 mitochondrial [Vitis vinifera]                      |
| 34   | 122   | gi 225462164 | 29.66 | 7  | 4 | 1 | 1.52E+08 | 1.44E+08 | 8.83E+07 | 2.79E+08 | 2.11E+08 | 1.70E+08 | 0.89:0.85:<br>0.52:1.64:<br>1.24:1.00 | 1.33E+08 | 2.20E+08 | 0.60:1.00 | 93979 | PREDICTED: elongation factor 2 [Vitis vinifera]                                           |
| 193  | 257   | gi 225433375 | 29.28 | 2  | 1 | 1 | 4.72E+07 | 3.45E+07 | 3.57E+07 | 1.08E+08 | 6.43E+07 | 5.10E+07 | 0.93:0.68:<br>0.70:2.12:<br>1.26:1.00 | 3.91E+07 | 7.45E+07 | 0.53:1.00 | 61370 | PREDICTED: chaperonin CPN60-2 mitochondrial [Vitis vinifera]                              |
| 1320 | 22312 | gi 731430037 | 28.72 | 4  | 1 | 1 | 1.26E+07 | 9.46E+06 | 8.01E+06 | 3.02E+07 | 1.74E+07 | 1.41E+07 | 0.89:0.67:<br>0.57:2.14:<br>1.23:1.00 | 1.00E+07 | 2.05E+07 | 0.49:1.00 | 43016 | PREDICTED: probable cinnamyl alcohol dehydrogenase 6 [Vitis vinifera]                     |
| 2491 | 55198 | gi 566185913 | 28.35 | 3  | 1 | 1 | 6.00E+07 | 4.65E+07 | 4.00E+07 | 1.18E+08 | 8.34E+07 | 6.76E+07 | 0.89:0.69:<br>0.59:1.74:<br>1.23:1.00 | 4.88E+07 | 8.96E+07 | 0.54:1.00 | 55777 | hypothetical protein POPTR_0009s02300g partial [Populus trichocarpa]                      |
| 1342 | 14827 | gi 731380214 | 28.11 | 4  | 1 | 1 | 3.32E+06 | 5.74E+06 | 5.97E+06 | 2.00E+07 | 1.58E+07 | 2.63E+06 | 1.26:2.19:<br>2.27:7.63:<br>6.02:1.00 | 5.01E+06 | 1.28E+07 | 0.39:1.00 | 37604 | PREDICTED: L-lactate dehydrogenase A isoform X1 [Vitis vinifera]                          |
| 2682 | 72842 | gi 225432296 | 27.88 | 10 | 1 | 1 | 4.52E+06 | 2.74E+06 | 2.51E+06 | 1.73E+07 | 1.10E+07 | 6.62E+06 | 0.68:0.41:<br>0.38:2.62:<br>1.66:1.00 | 3.26E+06 | 1.17E+07 | 0.28:1.00 | 16839 | PREDICTED: uncharacterized protein LOC100249327 [Vitis vinifera]                          |

|      |       |              |       |    |   |   |          |          |          |          |          |          |                                       |          |          |           |        |                                                                                     |
|------|-------|--------------|-------|----|---|---|----------|----------|----------|----------|----------|----------|---------------------------------------|----------|----------|-----------|--------|-------------------------------------------------------------------------------------|
| 1426 | 30756 | gi 731440862 | 27.88 | 11 | 1 | 1 | 2.00E+07 | 1.27E+07 | 1.42E+07 | 3.83E+07 | 3.72E+07 | 2.18E+07 | 0.91:0.58:<br>0.65:1.75:<br>1.70:1.00 | 1.58E+07 | 3.24E+07 | 0.49:1.00 | 15642  | PREDICTED: 60S ribosomal protein L32-1 [Vitis vinifera]                             |
| 88   | 280   | gi 225443399 | 27.87 | 10 | 4 | 1 | 7.02E+07 | 4.91E+07 | 4.38E+07 | 9.74E+07 | 8.83E+07 | 8.79E+07 | 0.80:0.56:<br>0.50:1.11:<br>1.00:1.00 | 5.44E+07 | 9.12E+07 | 0.60:1.00 | 68723  | PREDICTED: V-type proton ATPase catalytic subunit A [Vitis vinifera]                |
| 135  | 121   | gi 542688129 | 27.83 | 4  | 2 | 2 | 8.24E+07 | 6.85E+07 | 5.96E+07 | 4.90E+07 | 4.48E+07 | 3.72E+07 | 2.22:1.84:<br>1.60:1.32:<br>1.20:1.00 | 7.02E+07 | 4.37E+07 | 1.61:1.00 | 53694  | ATP synthase CF1 beta subunit (chloroplast) [Camellia taliensis]                    |
| 678  | 1383  | gi 526118026 | 27.6  | 2  | 1 | 1 | 2.91E+07 | 3.11E+06 | 3.15E+06 | 2.24E+07 | 3.90E+07 | 9.12E+06 | 3.19:0.34:<br>0.35:2.46:<br>4.28:1.00 | 1.18E+07 | 2.35E+07 | 0.50:1.00 | 55487  | 5-enolpyruvylshikimate-3-phosphate synthase [Vitis vinifera]                        |
| 131  | 7344  | gi 224119200 | 27.59 | 2  | 3 | 1 | 1.87E+07 | 1.48E+07 | 9.13E+06 | 3.21E+07 | 2.26E+07 | 1.82E+07 | 1.02:0.81:<br>0.50:1.76:<br>1.24:1.00 | 1.42E+07 | 2.43E+07 | 0.58:1.00 | 136903 | coatamer alpha subunit-like family protein [Populus trichocarpa]                    |
| 1104 | 22120 | gi 224129210 | 27.55 | 4  | 1 | 1 | 1.85E+07 | 1.44E+07 | 1.47E+07 | 4.26E+07 | 3.09E+07 | 1.83E+07 | 1.01:0.79:<br>0.80:2.32:<br>1.68:1.00 | 1.59E+07 | 3.06E+07 | 0.52:1.00 | 41121  | truncated acetyl Co-A acetyltransferase-like family protein [Populus trichocarpa]   |
| 1717 | 1481  | gi 566202597 | 27.31 | 11 | 1 | 1 | 2.69E+07 | 2.19E+07 | 1.97E+07 | 4.66E+07 | 4.14E+07 | 3.38E+07 | 0.80:0.65:<br>0.58:1.38:<br>1.23:1.00 | 2.28E+07 | 4.06E+07 | 0.56:1.00 | 16336  | hypothetical protein POPTR_0014s04880g [Populus trichocarpa]                        |
| 953  | 522   | gi 566184073 | 27.25 | 7  | 2 | 2 | 2.31E+08 | 2.18E+08 | 1.96E+08 | 1.40E+08 | 1.19E+08 | 1.29E+08 | 1.80:1.70:<br>1.52:1.09:<br>0.92:1.00 | 2.15E+08 | 1.29E+08 | 1.66:1.00 | 22518  | photosystem I 20kD family protein [Populus trichocarpa]                             |
| 672  | 729   | gi 731404671 | 27    | 10 | 2 | 1 | 1.41E+07 | 1.32E+07 | 9.28E+06 | 3.81E+07 | 2.23E+07 | 1.54E+07 | 0.91:0.85:<br>0.60:2.47:<br>1.44:1.00 | 1.22E+07 | 2.53E+07 | 0.48:1.00 | 29622  | PREDICTED: 14-3-3-like protein D isoform X1 [Vitis vinifera]                        |
| 154  | 1094  | gi 566150406 | 26.97 | 3  | 2 | 1 | 1.91E+07 | 0        | 0        | 8.42E+07 | 4.89E+07 | 2.08E+07 | 0.92:0.04:<br>.05:2.35:1:<br>.00      | 6.37E+06 | 5.13E+07 | 0.12:1.00 | 101827 | Argonaute 4 family protein [Populus trichocarpa]                                    |
| 1664 | 1489  | gi 225453350 | 26.75 | 11 | 1 | 1 | 5.77E+07 | 5.17E+07 | 4.66E+07 | 9.50E+07 | 8.24E+07 | 6.67E+07 | 0.87:0.77:<br>0.70:1.43:<br>1.24:1.00 | 5.20E+07 | 8.14E+07 | 0.64:1.00 | 16310  | PREDICTED: nucleoside diphosphate kinase B [Vitis vinifera]                         |
| 159  | 237   | gi 224063263 | 26.67 | 9  | 4 | 1 | 6.31E+07 | 6.75E+07 | 8.02E+07 | 1.13E+08 | 1.19E+08 | 1.05E+08 | 0.60:0.64:<br>0.76:1.07:<br>1.13:1.00 | 6.82E+07 | 1.12E+08 | 0.61:1.00 | 58692  | 2-dehydro-3-deoxyphosphoheptonate aldolase family protein [Populus trichocarpa]     |
| 1893 | 1754  | gi 224084784 | 26.48 | 1  | 1 | 1 | 2.91E+07 | 3.65E+07 | 3.51E+07 | 9.68E+06 | 1.79E+07 | 2.75E+07 | 1.06:1.33:<br>1.28:0.35:<br>0.65:1.00 | 3.36E+07 | 1.84E+07 | 1.83:1.00 | 61214  | glycine hydroxymethyltransferase family protein [Populus trichocarpa]               |
| 751  | 1422  | gi 731387895 | 26.19 | 3  | 1 | 1 | 8.81E+07 | 6.14E+07 | 8.52E+07 | 1.93E+08 | 1.49E+08 | 8.79E+07 | 1.00:0.70:<br>0.97:2.20:<br>1.70:1.00 | 7.82E+07 | 1.43E+08 | 0.55:1.00 | 51263  | PREDICTED: UTP--glucose-1-phosphate uridylyltransferase isoform X2 [Vitis vinifera] |
| 1644 | 22905 | gi 225434323 | 26.01 | 4  | 1 | 1 | 3.50E+07 | 2.51E+07 | 2.32E+07 | 6.00E+07 | 4.88E+07 | 4.02E+07 | 0.87:0.62:<br>0.58:1.49:<br>1.21:1.00 | 2.78E+07 | 4.97E+07 | 0.56:1.00 | 30353  | PREDICTED: eukaryotic translation initiation factor 2 subunit beta [Vitis vinifera] |
| 1979 | 7488  | gi 224107655 | 25.99 | 7  | 1 | 1 | 0        | 0        | 0        | 2.22E+07 | 6.63E+06 | 3.26E+06 | 0:0:0.681:<br>2.03:1.00               | 0        | 1.07E+07 | 00:01:0   | 33896  | 3-oxoacyl-[acyl-carrier-protein] reductase [Populus trichocarpa]                    |
| 2136 | 2831  | gi 224089062 | 25.18 | 6  | 1 | 1 | 2.33E+07 | 1.77E+07 | 1.36E+07 | 6.72E+07 | 4.85E+07 | 3.04E+07 | 0.77:0.58:<br>0.45:2.21:<br>1.60:1.00 | 1.82E+07 | 4.87E+07 | 0.37:1.00 | 27753  | hypothetical protein POPTR_0006s25870g [Populus trichocarpa]                        |

|      |       |              |       |    |   |   |          |          |          |          |          |          |                                       |          |          |           |       |                                                                                 |
|------|-------|--------------|-------|----|---|---|----------|----------|----------|----------|----------|----------|---------------------------------------|----------|----------|-----------|-------|---------------------------------------------------------------------------------|
| 2525 | 4507  | gi 225451318 | 25.08 | 4  | 1 | 1 | 3.10E+07 | 2.71E+07 | 2.37E+07 | 7.01E+07 | 4.43E+07 | 3.70E+07 | 0.84:0.73:<br>0.64:1.89:<br>1.20:1.00 | 2.73E+07 | 5.05E+07 | 0.54:1.00 | 37997 | PREDICTED: probable<br>aldo-keto reductase 1<br>[Vitis vinifera]                |
| 1849 | 46057 | gi 731389447 | 25.08 | 2  | 1 | 1 | 1.32E+07 | 6.34E+06 | 6.03E+06 | 5.00E+07 | 2.57E+07 | 2.14E+07 | 0.62:0.30:<br>0.28:2.34:<br>1.20:1.00 | 8.54E+06 | 3.24E+07 | 0.26:1.00 | 84064 | PREDICTED:<br>acylamino-acid-releasing<br>enzyme isoform X2<br>[Vitis vinifera] |
| 2722 | 2806  | gi 224137260 | 24.89 | 12 | 1 | 1 | 1.23E+08 | 9.12E+07 | 8.35E+07 | 2.23E+08 | 1.67E+08 | 1.43E+08 | 0.86:0.64:<br>0.58:1.56:<br>1.17:1.00 | 9.93E+07 | 1.78E+08 | 0.56:1.00 | 11459 | hypothetical protein<br>POPTR_0016s01100g<br>[Populus trichocarpa]              |
| 1136 | 2707  | gi 224120174 | 24.82 | 2  | 1 | 1 | 7.04E+06 | 5.03E+06 | 3.59E+06 | 2.04E+07 | 1.07E+07 | 1.07E+07 | 0.66:0.47:<br>0.34:1.91:<br>1.00:1.00 | 5.22E+06 | 1.39E+07 | 0.37:1.00 | 68576 | Phosphoglucosyltransferase<br>family protein [Populus<br>trichocarpa]           |
| 227  | 231   | gi 566204141 | 24.35 | 9  | 3 | 1 | 1.70E+08 | 1.37E+08 | 1.26E+08 | 3.99E+08 | 2.23E+08 | 1.90E+08 | 0.89:0.72:<br>0.66:2.10:<br>1.17:1.00 | 1.44E+08 | 2.55E+08 | 0.57:1.00 | 42935 | hypothetical protein<br>POPTR_0014s13660g<br>[Populus trichocarpa]              |
| 1170 | 37574 | gi 225464906 | 24.12 | 9  | 1 | 1 | 5.25E+07 | 5.01E+07 | 3.54E+07 | 7.18E+07 | 8.32E+07 | 7.16E+07 | 0.73:0.70:<br>0.49:1.00:<br>1.16:1.00 | 4.73E+07 | 7.60E+07 | 0.62:1.00 | 16377 | PREDICTED: 40S<br>ribosomal protein S14<br>[Vitis vinifera]                     |
| 1120 | 979   | gi 224108938 | 23.93 | 8  | 1 | 1 | 2.93E+07 | 2.23E+07 | 2.06E+07 | 6.99E+07 | 4.06E+07 | 2.84E+07 | 1.03:0.78:<br>0.73:2.46:<br>1.43:1.00 | 2.41E+07 | 4.63E+07 | 0.52:1.00 | 17381 | hypothetical protein<br>POPTR_0010s17020g<br>[Populus trichocarpa]              |
| 1505 | 1179  | gi 566170929 | 23.83 | 5  | 1 | 1 | 8.90E+07 | 7.20E+07 | 5.85E+07 | 1.94E+08 | 1.35E+08 | 1.11E+08 | 0.80:0.65:<br>0.53:1.75:<br>1.22:1.00 | 7.32E+07 | 1.47E+08 | 0.50:1.00 | 36394 | hypothetical protein<br>POPTR_0005s12070g<br>[Populus trichocarpa]              |
| 572  | 1069  | gi 225457219 | 23.77 | 3  | 1 | 1 | 8.90E+06 | 1.35E+07 | 1.14E+07 | 3.12E+07 | 2.38E+07 | 2.10E+07 | 0.42:0.64:<br>0.54:1.49:<br>1.13:1.00 | 1.16E+07 | 2.53E+07 | 0.46:1.00 | 35220 | PREDICTED: ATP<br>synthase subunit gamma<br>mitochondrial [Vitis<br>vinifera]   |
| 591  | 1171  | gi 224135449 | 23.63 | 2  | 1 | 1 | 4.92E+07 | 4.28E+07 | 4.51E+07 | 7.95E+07 | 6.95E+07 | 6.17E+07 | 0.80:0.69:<br>0.73:1.29:<br>1.13:1.00 | 4.57E+07 | 7.02E+07 | 0.65:1.00 | 57629 | chaperonin family<br>protein [Populus<br>trichocarpa]                           |
| 454  | 1592  | gi 225453246 | 23.5  | 2  | 1 | 1 | 9.80E+06 | 1.40E+07 | 1.07E+07 | 3.52E+07 | 2.17E+07 | 1.95E+07 | 0.50:0.72:<br>0.55:1.81:<br>1.11:1.00 | 1.15E+07 | 2.55E+07 | 0.45:1.00 | 69276 | PREDICTED: dynamin-<br>related protein 1E [Vitis<br>vinifera]                   |
| 1735 | 22123 | gi 225435203 | 23.26 | 8  | 1 | 1 | 5.52E+07 | 5.19E+07 | 3.84E+07 | 8.55E+07 | 7.43E+07 | 6.26E+07 | 0.88:0.83:<br>0.61:1.36:<br>1.19:1.00 | 4.85E+07 | 7.41E+07 | 0.65:1.00 | 15652 | PREDICTED: 40S<br>ribosomal protein S23-<br>like [Vitis vinifera]               |
| 1293 | 45435 | gi 224059670 | 23.19 | 5  | 1 | 1 | 9.77E+06 | 7.58E+06 | 6.65E+06 | 3.90E+07 | 2.83E+07 | 1.98E+07 | 0.49:0.38:<br>0.34:1.97:<br>1.43:1.00 | 8.00E+06 | 2.90E+07 | 0.28:1.00 | 25980 | 60S ribosomal protein<br>L6 [Populus trichocarpa]                               |
| 602  | 22099 | gi 566146555 | 23.09 | 8  | 1 | 1 | 4.24E+07 | 2.84E+07 | 2.41E+07 | 6.73E+07 | 1.25E+08 | 3.93E+07 | 1.08:0.72:<br>0.61:1.71:<br>3.18:1.00 | 3.16E+07 | 7.72E+07 | 0.41:1.00 | 23812 | 60S ribosomal protein<br>L13 [Populus<br>trichocarpa]                           |
| 2147 | 1881  | gi 526117942 | 23.02 | 4  | 1 | 1 | 3.35E+07 | 2.25E+07 | 1.46E+07 | 5.28E+07 | 4.32E+07 | 4.11E+07 | 0.81:0.55:<br>0.36:1.28:<br>1.05:1.00 | 2.35E+07 | 4.57E+07 | 0.51:1.00 | 37456 | beta 1-3 glucanase<br>precursor [Vitis vinifera]                                |
| 1366 | 1649  | gi 731371455 | 22.88 | 2  | 1 | 1 | 2.47E+07 | 1.78E+07 | 1.33E+07 | 4.44E+07 | 3.02E+07 | 2.65E+07 | 0.93:0.67:<br>0.50:1.68:<br>1.14:1.00 | 1.86E+07 | 3.37E+07 | 0.55:1.00 | 58282 | PREDICTED: coatomer<br>subunit delta [Vitis<br>vinifera]                        |
| 1991 | 14731 | gi 225465441 | 22.73 | 12 | 1 | 1 | 1.75E+07 | 1.46E+07 | 1.29E+07 | 2.96E+07 | 2.36E+07 | 1.89E+07 | 0.93:0.77:<br>0.68:1.57:<br>1.25:1.00 | 1.50E+07 | 2.41E+07 | 0.62:1.00 | 14675 | PREDICTED:<br>cytochrome b5 [Vitis<br>vinifera]                                 |
| 1585 | 3017  | gi 225455106 | 22.6  | 4  | 1 | 1 | 3.36E+07 | 3.30E+07 | 3.45E+07 | 5.95E+07 | 5.15E+07 | 4.64E+07 | 0.72:0.71:<br>0.74:1.28:<br>1.11:1.00 | 3.37E+07 | 5.25E+07 | 0.64:1.00 | 33350 | PREDICTED: protein<br>BOBBER 1 [Vitis<br>vinifera]                              |

|      |       |              |       |    |   |   |          |          |          |          |          |          |                                            |          |          |           |       |                                                                                           |
|------|-------|--------------|-------|----|---|---|----------|----------|----------|----------|----------|----------|--------------------------------------------|----------|----------|-----------|-------|-------------------------------------------------------------------------------------------|
| 2220 | 2201  | gi 731408423 | 22.49 | 2  | 1 | 1 | 1.33E+07 | 1.60E+07 | 1.43E+07 | 1.22E+06 | 8.02E+06 | 8.97E+06 | 1.49:1.79:<br>1.60:0.14:<br>0.89:1.00      | 1.46E+07 | 6.07E+06 | 2.40:1.00 | 43098 | PREDICTED: serine carboxypeptidase-like 18 isoform X4 [Vitis vinifera]                    |
| 1961 | 1934  | gi 225437898 | 22.42 | 6  | 2 | 1 | 6.38E+07 | 6.51E+07 | 6.77E+07 | 3.20E+07 | 3.10E+07 | 3.16E+07 | 2.02:2.06:<br>2.14:1.01:<br>0.98:1.00      | 6.56E+07 | 3.15E+07 | 2.08:1.00 | 15168 | PREDICTED: photosystem I reaction center subunit IV B chloroplastic-like [Vitis vinifera] |
| 1853 | 1401  | gi 225435878 | 22.36 | 10 | 1 | 1 | 5.23E+07 | 5.19E+07 | 4.97E+07 | 1.24E+08 | 7.74E+07 | 7.24E+07 | 0.72:0.72:<br>0.69:1.71:<br>1.07:1.00      | 5.13E+07 | 8.71E+07 | 0.59:1.00 | 10567 | PREDICTED: 10 kDa chaperonin [Vitis vinifera]                                             |
| 652  | 1407  | gi 225432012 | 22.27 | 2  | 1 | 1 | 4.61E+07 | 7.72E+06 | 4.71E+06 | 1.57E+08 | 9.48E+06 | 1.22E+07 | 3.77:0.63:<br>0.38:12.8<br>3:0.77:1.0<br>0 | 1.95E+07 | 4.74E+07 | 0.41:1.00 | 54243 | PREDICTED: galactokinase [Vitis vinifera]                                                 |
| 1969 | 3021  | gi 224078826 | 22.15 | 4  | 1 | 1 | 5.84E+08 | 6.09E+08 | 5.89E+08 | 4.01E+08 | 3.98E+08 | 3.88E+08 | 1.51:1.57:<br>1.52:1.03:<br>1.03:1.00      | 5.94E+08 | 3.95E+08 | 1.50:1.00 | 24905 | Oxygen-evolving enhancer protein 3-1 [Populus trichocarpa]                                |
| 1049 | 1672  | gi 566204499 | 22.13 | 4  | 1 | 1 | 6.78E+07 | 1.93E+07 | 1.55E+07 | 5.26E+07 | 3.82E+07 | 9.68E+07 | 0.70:0.20:<br>0.16:0.54:<br>0.39:1.00      | 3.42E+07 | 6.25E+07 | 0.55:1.00 | 47320 | thioredoxin family protein [Populus trichocarpa]                                          |
| 819  | 2031  | gi 225425838 | 22    | 10 | 2 | 1 | 8.51E+06 | 9.09E+06 | 7.44E+06 | 1.35E+07 | 1.50E+07 | 1.70E+07 | 0.50:0.54:<br>0.44:0.79:<br>0.88:1.00      | 8.25E+06 | 1.52E+07 | 0.54:1.00 | 26900 | PREDICTED: adenylate kinase 4-like [Vitis vinifera]                                       |
| 2753 | 22542 | gi 566210973 | 21.81 | 6  | 1 | 1 | 5.72E+07 | 5.80E+07 | 4.96E+07 | 2.30E+07 | 3.03E+07 | 3.36E+07 | 1.70:1.73:<br>1.48:0.68:<br>0.90:1.00      | 5.49E+07 | 2.90E+07 | 1.90:1.00 | 15927 | hypothetical protein POPTR_0017s02810g [Populus trichocarpa]                              |
| 277  | 445   | gi 225427768 | 21.71 | 17 | 4 | 1 | 1.07E+08 | 9.33E+07 | 8.22E+07 | 2.60E+08 | 1.53E+08 | 1.35E+08 | 0.80:0.69:<br>0.61:1.93:<br>1.13:1.00      | 9.43E+07 | 1.73E+08 | 0.54:1.00 | 42948 | PREDICTED: fructose-bisphosphate aldolase 1 chloroplastic [Vitis vinifera]                |
| 2219 | 1982  | gi 224107333 | 21.66 | 12 | 1 | 1 | 4.15E+07 | 3.94E+07 | 3.53E+07 | 8.25E+07 | 5.00E+07 | 6.90E+07 | 0.60:0.57:<br>0.51:1.20:<br>0.72:1.00      | 3.87E+07 | 7.06E+07 | 0.55:1.00 | 9716  | hypothetical protein POPTR_0010s02580g [Populus trichocarpa]                              |
| 834  | 1045  | gi 225459292 | 21.6  | 6  | 2 | 1 | 5.36E+06 | 3.50E+06 | 3.35E+06 | 1.27E+07 | 8.17E+06 | 6.55E+06 | 0.82:0.53:<br>0.51:1.94:<br>1.25:1.00      | 4.07E+06 | 9.27E+06 | 0.44:1.00 | 28739 | PREDICTED: 14-3-3 protein 7 [Vitis vinifera]                                              |
| 2629 | 7527  | gi 566152777 | 21.53 | 15 | 1 | 1 | 9.12E+06 | 9.57E+06 | 8.60E+06 | 3.28E+07 | 2.37E+07 | 1.44E+07 | 0.63:0.67:<br>0.60:2.28:<br>1.64:1.00      | 9.10E+06 | 2.36E+07 | 0.39:1.00 | 12696 | hypothetical protein POPTR_0001s34690g [Populus trichocarpa]                              |
| 919  | 1679  | gi 526117723 | 21.5  | 3  | 1 | 1 | 5.98E+07 | 4.64E+07 | 5.00E+07 | 9.72E+07 | 8.50E+07 | 6.04E+07 | 0.99:0.77:<br>0.83:1.61:<br>1.41:1.00      | 5.21E+07 | 8.09E+07 | 0.64:1.00 | 56980 | catalase [Vitis vinifera]                                                                 |
| 2551 | 54869 | gi 566187444 | 21.45 | 2  | 1 | 1 | 1.69E+07 | 1.31E+07 | 1.24E+07 | 0        | 2.10E+06 | 3.84E+06 | 4.39:3.40:<br>3.24:0.5<br>5:1.00           | 1.41E+07 | 1.98E+06 | 7.14:1.00 | 54252 | allene oxide synthase family protein [Populus trichocarpa]                                |
| 983  | 22324 | gi 731440185 | 21.32 | 8  | 2 | 1 | 4.32E+07 | 3.50E+07 | 3.42E+07 | 7.16E+07 | 8.14E+07 | 4.85E+07 | 0.89:0.72:<br>0.70:1.48:<br>1.68:1.00      | 3.75E+07 | 6.54E+07 | 0.57:1.00 | 30189 | PREDICTED: 60S ribosomal protein L5-like [Vitis vinifera]                                 |
| 775  | 45654 | gi 224129596 | 21.32 | 6  | 1 | 1 | 0        | 0        | 0        | 7.51E+07 | 4.16E+07 | 0        | 0:0:0:1.00<br>-0.55:0                      | 0        | 3.89E+07 | 00:01:0   | 45200 | Succinyl-CoA ligase beta-chain family protein [Populus trichocarpa]                       |
| 908  | 1133  | gi 225438781 | 21.24 | 2  | 1 | 1 | 1.98E+07 | 1.53E+07 | 1.56E+07 | 3.44E+07 | 3.04E+07 | 2.38E+07 | 0.83:0.64:<br>0.65:1.44:<br>1.28:1.00      | 1.69E+07 | 2.95E+07 | 0.57:1.00 | 71362 | PREDICTED: polyadenylate-binding protein 2 [Vitis vinifera]                               |

|      |       |              |       |    |   |   |          |          |          |          |          |          |                                       |          |          |           |        |                                                                                          |
|------|-------|--------------|-------|----|---|---|----------|----------|----------|----------|----------|----------|---------------------------------------|----------|----------|-----------|--------|------------------------------------------------------------------------------------------|
| 2541 | 1666  | gi 731384053 | 21.14 | 2  | 1 | 1 | 7.90E+07 | 7.59E+07 | 6.08E+07 | 1.61E+08 | 1.08E+08 | 9.50E+07 | 0.83:0.80:<br>0.64:1.69:<br>1.13:1.00 | 7.19E+07 | 1.21E+08 | 0.59:1.00 | 52608  | PREDICTED: LL-diaminopimelate aminotransferase chloroplastic isoform X1 [Vitis vinifera] |
| 502  | 1083  | gi 359481634 | 21.13 | 23 | 2 | 1 | 3.66E+07 | 3.18E+07 | 2.32E+07 | 6.45E+07 | 5.02E+07 | 4.27E+07 | 0.86:0.74:<br>0.54:1.51:<br>1.17:1.00 | 3.05E+07 | 5.25E+07 | 0.58:1.00 | 16594  | PREDICTED: ubiquitin-conjugating enzyme E2 variant 1D [Vitis vinifera]                   |
| 1507 | 1711  | gi 224057272 | 21.03 | 5  | 1 | 1 | 6.95E+07 | 1.60E+07 | 6.20E+07 | 1.59E+08 | 4.00E+07 | 9.06E+07 | 0.77:0.18:<br>0.68:1.76:<br>0.44:1.00 | 4.92E+07 | 9.66E+07 | 0.51:1.00 | 45612  | aspartyl protease family protein [Populus trichocarpa]                                   |
| 1836 | 7461  | gi 731428733 | 20.89 | 0  | 1 | 1 | 5.54E+07 | 5.60E+07 | 5.26E+07 | 8.28E+07 | 9.37E+07 | 8.94E+07 | 0.62:0.63:<br>0.59:0.93:<br>1.05:1.00 | 5.47E+07 | 8.86E+07 | 0.62:1.00 | 407701 | PREDICTED: E3 ubiquitin-protein ligase UPL2-like [Vitis vinifera]                        |
| 2747 | 14746 | gi 224070843 | 20.74 | 8  | 1 | 1 | 1.77E+07 | 1.25E+07 | 1.10E+07 | 2.55E+07 | 2.31E+07 | 2.01E+07 | 0.88:0.62:<br>0.55:1.27:<br>1.15:1.00 | 1.37E+07 | 2.29E+07 | 0.60:1.00 | 19159  | glutaredoxin family protein [Populus trichocarpa]                                        |
| 2621 | 3035  | gi 359491781 | 20.62 | 6  | 1 | 1 | 4.78E+07 | 4.03E+07 | 3.36E+07 | 6.00E+07 | 6.77E+07 | 5.64E+07 | 0.85:0.72:<br>0.60:1.06:<br>1.20:1.00 | 4.06E+07 | 6.14E+07 | 0.66:1.00 | 18046  | PREDICTED: miraculin-like partial [Vitis vinifera]                                       |
| 1368 | 1841  | gi 566185810 | 20.18 | 2  | 1 | 1 | 0        | 0        | 3.26E+06 | 3.83E+07 | 2.10E+07 | 1.13E+07 | 0:0:0.29:3<br>.38:1.86:1<br>.00       | 1.09E+06 | 2.36E+07 | 0.05:1.00 | 94037  | beta-galactosidase family protein [Populus trichocarpa]                                  |



Table S8 The *Vitis vinifera* orthologs of differentially expressed proteins between HY1 and CK1

| GI of identified differentially expressed proteins | Vitis vinifera orthologs |
|----------------------------------------------------|--------------------------|
| gi 359486799 ref XP_002283532.2                    | tr F6HNX5 F6HNX5 VITVI   |
| gi 731393844 ref XP_010651616.1                    | tr D7T1K2 D7T1K2 VITVI   |
| gi 225468576 ref XP_002263337.1                    | tr D7T1R6 D7T1R6 VITVI   |
| gi 225433510 ref XP_002266276.1                    | tr F6GWF3 F6GWF3 VITVI   |
| gi 731406213 ref XP_010656084.1                    | tr F6HGZ9 F6HGZ9 VITVI   |
| gi 359492254 ref XP_002274366.2                    | tr E0CQ75 E0CQ75 VITVI   |
| gi 225457971 ref XP_002275563.1                    | tr A5ANR7 A5ANR7 VITVI   |
| gi 359483839 ref XP_003633024.1                    | tr A5BAI4 A5BAI4 VITVI   |
| gi 224053300 ref XP_002297752.1                    | tr A5C8S5 A5C8S5 VITVI   |
| gi 225437428 ref XP_002271896.1                    | tr A5C6H7 A5C6H7 VITVI   |
| gi 552540866 ref YP_008592859.1                    | sp Q0ZJ07 CYF VITVI      |
| gi 671743230 ref YP_009050761.1                    | sp Q0ZJ21 PSAB VITVI     |
| gi 671743315 ref YP_009050845.1                    | sp Q0ZJ24 PSBC VITVI     |
| gi 566176273 ref XP_006381564.1                    | tr F6HGZ9 F6HGZ9 VITVI   |
| gi 224064707 ref XP_002301540.1                    | tr D7SHU4 D7SHU4 VITVI   |
| gi 566184073 ref XP_002311618.2                    | tr D7TDX6 D7TDX6 VITVI   |
| gi 224084209 ref XP_002307234.1                    | tr F6I229 F6I229 VITVI   |
| gi 359497883 ref XP_003635681.1                    | tr F6HRP4 F6HRP4 VITVI   |
| gi 225423961 ref XP_002282429.1                    | tr F6HEX2 F6HEX2 VITVI   |
| gi 731430736 ref XP_010665150.1                    | tr F6GY49 F6GY49 VITVI   |
| gi 359475502 ref XP_003631692.1                    | tr A5BEJ8 A5BEJ8 VITVI   |
| gi 224077927 ref XP_002305462.1                    | tr F6GWQ0 F6GWQ0 VITVI   |
| gi 224104269 ref XP_002313378.1                    | tr D7SJX8 D7SJX8 VITVI   |
| gi 731388721 ref XP_010649714.1                    | tr A5BM68 A5BM68 VITVI   |
| gi 225451279 ref XP_002277791.1                    | tr F6HTT2 F6HTT2 VITVI   |
| gi 671743459 ref YP_009050989.1                    | tr B6VJW4 B6VJW4 VITVI   |
| gi 566197644 ref XP_002318702.2                    | tr D7SHA2 D7SHA2 VITVI   |
| gi 731395934 ref XP_010652337.1                    | tr D7U2U2 D7U2U2 VITVI   |
| gi 225432758 ref XP_002283142.1                    | tr D7T724 D7T724 VITVI   |
| gi 224090212 ref XP_002308954.1                    | tr A5BIQ8 A5BIQ8 VITVI   |
| gi 225447576 ref XP_002271687.1                    | tr A5ASG6 A5ASG6 VITVI   |
| gi 225449262 ref XP_002280581.1                    | tr F6HNN4 F6HNN4 VITVI   |
| gi 359480225 ref XP_002273421.2                    | tr D7U2S0 D7U2S0 VITVI   |
| gi 225455513 ref XP_002265347.1                    | tr A5AJ83 A5AJ83 VITVI   |
| gi 225443760 ref XP_002270266.1                    | tr F6HMA9 F6HMA9 VITVI   |
| gi 566170863 ref XP_006383122.1                    | tr A5B4J3 A5B4J3 VITVI   |

|                                 |                        |
|---------------------------------|------------------------|
| gi 566158065 ref XP_002301277.2 | tr D7U7W7 D7U7W7_VITVI |
| gi 225459564 ref XP_002285857.1 | tr E0CR63 E0CR63_VITVI |
| gi 225429209 ref XP_002272116.1 | tr D7T3Q1 D7T3Q1_VITVI |
| gi 225462285 ref XP_002265046.1 | tr F6H9U0 F6H9U0_VITVI |
| gi 731421236 ref XP_010661662.1 | tr D7U7W7 D7U7W7_VITVI |
| gi 566165056 ref XP_002305754.2 | tr F6HM78 F6HM78_VITVI |
| gi 566171771 ref XP_002306586.2 | tr E0CRH7 E0CRH7_VITVI |
| gi 224066545 ref XP_002302129.1 | tr D7U865 D7U865_VITVI |
| gi 566151109 ref XP_002298397.2 | tr A5BIQ8 A5BIQ8_VITVI |
| gi 225456914 ref XP_002281019.1 | tr A5BE36 A5BE36_VITVI |
| gi 731410160 ref XP_010657457.1 | tr F6HHN8 F6HHN8_VITVI |
| gi 224095668 ref XP_002310430.1 | tr A5B8T3 A5B8T3_VITVI |
| gi 225434133 ref XP_002277485.1 | tr D7T2G6 D7T2G6_VITVI |
| gi 566202763 ref XP_006375250.1 | tr F6HD52 F6HD52_VITVI |
| gi 225429772 ref XP_002282619.1 | tr F6H3A8 F6H3A8_VITVI |
| gi 225428011 ref XP_002278341.1 | tr D7U561 D7U561_VITVI |
| gi 224124892 ref XP_002319448.1 | tr Q0MYQ7 Q0MYQ7_VITVI |
| gi 566162704 ref XP_006385815.1 | tr F6H2R3 F6H2R3_VITVI |
| gi 731398611 ref XP_010653323.1 | tr D7SRG7 D7SRG7_VITVI |
| gi 224104103 ref XP_002313320.1 | tr A5AUZ0 A5AUZ0_VITVI |
| gi 566146555 ref XP_006368290.1 | tr D7TF52 D7TF52_VITVI |
| gi 225436257 ref XP_002273201.1 | tr F6I5I9 F6I5I9_VITVI |
| gi 225429975 ref XP_002283985.1 | tr F6H3E6 F6H3E6_VITVI |
| gi 731437331 ref XP_002272813.2 | tr A5BKX2 A5BKX2_VITVI |
| gi 225459318 ref XP_002285795.1 | tr A5BTZ8 A5BTZ8_VITVI |
| gi 225435203 ref XP_002284863.1 | tr F6HNK2 F6HNK2_VITVI |
| gi 731436245 ref XP_010645817.1 | tr F6HJD7 F6HJD7_VITVI |
| gi 225469850 ref XP_002266051.1 | tr D7TGB6 D7TGB6_VITVI |
| gi 731416683 ref XP_010659986.1 | tr F6HTY5 F6HTY5_VITVI |
| gi 566175322 ref XP_002308181.2 | tr F6HL41 F6HL41_VITVI |
| gi 224092348 ref XP_002309570.1 | tr F6HYE7 F6HYE7_VITVI |
| gi 225432586 ref XP_002281350.1 | tr A5ASC2 A5ASC2_VITVI |
| gi 225457389 ref XP_002284856.1 | tr A5AEI0 A5AEI0_VITVI |
| gi 359497056 ref XP_002263033.2 | tr F6HD61 F6HD61_VITVI |
| gi 225425513 ref XP_002266183.1 | tr D7TDE2 D7TDE2_VITVI |
| gi 526117629 ref NP_001268074.1 | tr F6GXX3 F6GXX3_VITVI |
| gi 731408416 ref XP_010656845.1 | tr F6GXH4 F6GXH4_VITVI |
| gi 225464489 ref XP_002268754.1 | tr E0CV06 E0CV06_VITVI |

|                                 |                        |
|---------------------------------|------------------------|
| gi 225427973 ref XP_002277628.1 | tr F6I111 F6I111_VITVI |
| gi 224098816 ref XP_002311278.1 | tr F6H9S5 F6H9S5_VITVI |
| gi 566187811 ref XP_002313723.2 | tr F6I111 F6I111_VITVI |
| gi 566256321 ref XP_006388123.1 | tr A5C101 A5C101_VITVI |
| gi 566161648 ref XP_006385625.1 | tr D7TTY4 D7TTY4_VITVI |
| gi 224109620 ref XP_002315258.1 | tr D7T475 D7T475_VITVI |
| gi 566212112 ref XP_006373055.1 | tr C4P7W1 C4P7W1_VITVI |
| gi 566197051 ref XP_006376775.1 | tr D7TE76 D7TE76_VITVI |
| gi 566203933 ref XP_002321184.2 | tr A5CBL0 A5CBL0_VITVI |
| gi 224066487 ref XP_002302108.1 | tr F6HI46 F6HI46_VITVI |
| gi 225447745 ref XP_002263201.1 | tr A5ASW8 A5ASW8_VITVI |
| gi 225443988 ref XP_002280687.1 | tr F6HLW0 F6HLW0_VITVI |
| gi 566255736 ref XP_006387910.1 | tr F6HZ27 F6HZ27_VITVI |
| gi 225424750 ref XP_002267612.1 | tr D7TNM7 D7TNM7_VITVI |
| gi 731438465 ref XP_010647190.1 | tr A5B9M3 A5B9M3_VITVI |
| gi 225463990 ref XP_002263795.1 | tr D7TX69 D7TX69_VITVI |
| gi 359494267 ref XP_002266007.2 | tr F6HR77 F6HR77_VITVI |
| gi 225453275 ref XP_002267346.1 | tr F6GVE3 F6GVE3_VITVI |
| gi 224064488 ref XP_002301501.1 | tr A5BIW0 A5BIW0_VITVI |

Table S9 The *Vitis vinifera* orthologs of differentially expressed proteins between HY2 and CK2

| GI of identified differentially expressed proteins |           |                    | Vitis vinifera orthologs |                     |
|----------------------------------------------------|-----------|--------------------|--------------------------|---------------------|
| gi                                                 | 669100005 | ref YP_009047940.1 | sp                       | P56648 RBL_VITVI    |
| gi                                                 | 669100005 | ref YP_009047940.1 | tr                       | A5BTM9 A5BTM9_VITVI |
| gi                                                 | 669100005 | ref YP_009047940.1 | tr                       | D7U748 D7U748_VITVI |
| gi                                                 | 225462164 | ref XP_002266780.1 | tr                       | F6H4T7 F6H4T7_VITVI |
| gi                                                 | 224094244 | ref XP_002310106.1 | tr                       | F6H4T7 F6H4T7_VITVI |
| gi                                                 | 225426230 | ref XP_002263323.1 | tr                       | F6HU55 F6HU55_VITVI |
| gi                                                 | 566225321 | ref XP_006371013.1 | tr                       | F6I0I5 F6I0I5_VITVI |
| gi                                                 | 225443399 | ref XP_002267279.1 | tr                       | D7SS06 D7SS06_VITVI |
| gi                                                 | 566196410 | ref XP_002317789.2 | tr                       | F6HU55 F6HU55_VITVI |
| gi                                                 | 224365668 | ref YP_002608395.1 | tr                       | B6VJY3 B6VJY3_VITVI |
| gi                                                 | 566146990 | ref XP_006368489.1 | tr                       | F6HYK6 F6HYK6_VITVI |
| gi                                                 | 225456079 | ref XP_002280824.1 | tr                       | F6GTT2 F6GTT2_VITVI |
| gi                                                 | 224073124 | ref XP_002303983.1 | tr                       | D7SLM9 D7SLM9_VITVI |
| gi                                                 | 224065861 | ref XP_002301975.1 | tr                       | A5AKD8 A5AKD8_VITVI |
| gi                                                 | 224119200 | ref XP_002318013.1 | tr                       | F6GZQ1 F6GZQ1_VITVI |
| gi                                                 | 542688129 | ref YP_008520146.1 | sp                       | Q0ZJ13 ATPB_VITVI   |
| gi                                                 | 566150406 | ref XP_006369390.1 | tr                       | D7T1K2 D7T1K2_VITVI |
| gi                                                 | 359490179 | ref XP_002266494.2 | tr                       | F6HAM6 F6HAM6_VITVI |
| gi                                                 | 224063263 | ref XP_002301067.1 | tr                       | F6H0X2 F6H0X2_VITVI |
| gi                                                 | 526117645 | ref NP_001268078.1 | tr                       | F6HKY8 F6HKY8_VITVI |
| gi                                                 | 359496771 | ref XP_002272173.2 | tr                       | F6HCT7 F6HCT7_VITVI |
| gi                                                 | 731424802 | ref XP_010663020.1 | tr                       | F6GT15 F6GT15_VITVI |
| gi                                                 | 225433375 | ref XP_002285608.1 | tr                       | D7TS57 D7TS57_VITVI |
| gi                                                 | 731419756 | ref XP_010661131.1 | tr                       | F6HF82 F6HF82_VITVI |
| gi                                                 | 566204141 | ref XP_002321065.2 | tr                       | F6H409 F6H409_VITVI |
| gi                                                 | 225431871 | ref XP_002275593.1 | tr                       | D7SY66 D7SY66_VITVI |
| gi                                                 | 224109060 | ref XP_002315066.1 | tr                       | A5CAF8 A5CAF8_VITVI |
| gi                                                 | 359478916 | ref XP_003632187.1 | tr                       | D7SKB2 D7SKB2_VITVI |
| gi                                                 | 225427768 | ref XP_002267726.1 | tr                       | A5BDH7 A5BDH7_VITVI |
| gi                                                 | 671743315 | ref YP_009050845.1 | sp                       | Q0ZJ24 PSBC_VITVI   |

|    |           |     |                |  |    |        |              |
|----|-----------|-----|----------------|--|----|--------|--------------|
| gi | 225430619 | ref | XP_002266736.1 |  | tr | D7TDS1 | D7TDS1_VITVI |
| gi | 225427917 | ref | XP_002274871.1 |  | tr | F6I134 | F6I134_VITVI |
| gi | 224109788 | ref | XP_002315310.1 |  | tr | F6HNF4 | F6HNF4_VITVI |
| gi | 225457957 | ref | XP_002274869.1 |  | tr | A5AKD8 | A5AKD8_VITVI |
| gi | 542688125 | ref | YP_008520165.1 |  | sp | Q0ZIZ3 | PSBB_VITVI   |
| gi | 224143423 | ref | XP_002324951.1 |  | tr | A5AHP0 | A5AHP0_VITVI |
| gi | 566210462 | ref | XP_006372317.1 |  | tr | F6I5I7 | F6I5I7_VITVI |
| gi | 225439231 | ref | XP_002271046.1 |  | tr | F6HMP3 | F6HMP3_VITVI |
| gi | 225453246 | ref | XP_002265511.1 |  | tr | D7SM53 | D7SM53_VITVI |
| gi | 671743230 | ref | YP_009050761.1 |  | sp | Q0ZJ21 | PSAB_VITVI   |
| gi | 552540866 | ref | YP_008592859.1 |  | sp | Q0ZJ07 | CYF_VITVI    |
| gi | 359481634 | ref | XP_003632650.1 |  | tr | D7TH48 | D7TH48_VITVI |
| gi | 224083020 | ref | XP_002306932.1 |  | tr | A5AKD8 | A5AKD8_VITVI |
| gi | 552541026 | ref | YP_008593111.1 |  | sp | Q0ZJ20 | PSAA_VITVI   |
| gi | 552540956 | ref | YP_008592913.1 |  | sp | Q0ZJ40 | PSBA_VITVI   |
| gi | 566210666 | ref | XP_006372413.1 |  | tr | F6I0H8 | F6I0H8_VITVI |
| gi | 225430366 | ref | XP_002282880.1 |  | tr | D7SUY2 | D7SUY2_VITVI |
| gi | 566206623 | ref | XP_002321583.2 |  | tr | D7SHU4 | D7SHU4_VITVI |
| gi | 225457219 | ref | XP_002284053.1 |  | tr | D7SI12 | D7SI12_VITVI |
| gi | 225447725 | ref | XP_002277666.1 |  | tr | F6HWL2 | F6HWL2_VITVI |
| gi | 224135449 | ref | XP_002322076.1 |  | tr | F6GTS3 | F6GTS3_VITVI |
| gi | 566167040 | ref | XP_002306169.2 |  | tr | F6I134 | F6I134_VITVI |
| gi | 566146555 | ref | XP_006368290.1 |  | tr | D7TF52 | D7TF52_VITVI |
| gi | 225426753 | ref | XP_002275872.1 |  | tr | F6HUI4 | F6HUI4_VITVI |
| gi | 552540940 | ref | YP_008592942.1 |  | sp | Q0ZJ11 | ACCD_VITVI   |
| gi | 225443760 | ref | XP_002270266.1 |  | tr | F6HMA9 | F6HMA9_VITVI |
| gi | 225444472 | ref | XP_002272701.1 |  | tr | F6H7I9 | F6H7I9_VITVI |
| gi | 225432012 | ref | XP_002279647.1 |  | tr | F6H710 | F6H710_VITVI |
| gi | 731404671 | ref | XP_010655514.1 |  | tr | D7TJL0 | D7TJL0_VITVI |
| gi | 225441754 | ref | XP_002283367.1 |  | tr | D7TI00 | D7TI00_VITVI |
| gi | 526118026 | ref | NP_001268176.1 |  | tr | DOVBC7 | DOVBC7_VITVI |
| gi | 225466690 | ref | XP_002263049.1 |  | tr | D7TMH3 | D7TMH3_VITVI |

|    |           |     |                |  |    |        |              |
|----|-----------|-----|----------------|--|----|--------|--------------|
| gi | 225465837 | ref | XP_002264626.1 |  | tr | F6HVD5 | F6HVD5_VITVI |
| gi | 224114720 | ref | XP_002316838.1 |  | tr | F6HM73 | F6HM73_VITVI |
| gi | 225439064 | ref | XP_002266205.1 |  | tr | C5DB50 | C5DB50_VITVI |
| gi | 566192956 | ref | XP_002317199.2 |  | tr | F6HTQ1 | F6HTQ1_VITVI |
| gi | 225455784 | ref | XP_002274334.1 |  | tr | F6GTG3 | F6GTG3_VITVI |
| gi | 225461156 | ref | XP_002282795.1 |  | tr | E0CT43 | E0CT43_VITVI |
| gi | 731401656 | ref | XP_010654370.1 |  | tr | F6HXL1 | F6HXL1_VITVI |
| gi | 566213188 | ref | XP_006373422.1 |  | tr | F6GT74 | F6GT74_VITVI |
| gi | 224063997 | ref | XP_002301340.1 |  | tr | D7UC26 | D7UC26_VITVI |
| gi | 731387895 | ref | XP_010649415.1 |  | tr | F6IOH8 | F6IOH8_VITVI |
| gi | 566254838 | ref | XP_006387604.1 |  | tr | A5AW13 | A5AW13_VITVI |
| gi | 731376167 | ref | XP_010655500.1 |  | tr | D7TAR8 | D7TAR8_VITVI |
| gi | 526117441 | ref | NP_001268023.1 |  | tr | D7SLA9 | D7SLA9_VITVI |
| gi | 224129596 | ref | XP_002320625.1 |  | tr | A5BF93 | A5BF93_VITVI |
| gi | 224137032 | ref | XP_002322477.1 |  | tr | F6H6M8 | F6H6M8_VITVI |
| gi | 566242200 | ref | XP_006371499.1 |  | tr | F6HAV9 | F6HAV9_VITVI |
| gi | 566149424 | ref | XP_002298224.2 |  | tr | F6HXU4 | F6HXU4_VITVI |
| gi | 566176147 | ref | XP_006381503.1 |  | tr | F6GUN5 | F6GUN5_VITVI |
| gi | 225425838 | ref | XP_002266762.1 |  | tr | F6HG55 | F6HG55_VITVI |
| gi | 225430650 | ref | XP_002269441.1 |  | tr | F6HI27 | F6HI27_VITVI |
| gi | 225459292 | ref | XP_002285787.1 |  | tr | E0CRL1 | E0CRL1_VITVI |
| gi | 568244554 | ref | YP_008963301.1 |  | sp | Q0ZJ25 | PSBD_VITVI   |
| gi | 224114826 | ref | XP_002316867.1 |  | tr | F6H4Z9 | F6H4Z9_VITVI |
| gi | 225434133 | ref | XP_002277485.1 |  | tr | D7T2G6 | D7T2G6_VITVI |
| gi | 225438781 | ref | XP_002283105.1 |  | tr | D7SVT7 | D7SVT7_VITVI |
| gi | 526117723 | ref | NP_001268098.1 |  | tr | F6IOK4 | F6IOK4_VITVI |
| gi | 359485890 | ref | XP_002264183.2 |  | tr | F6I6R4 | F6I6R4_VITVI |
| gi | 359494079 | ref | XP_002277391.2 |  | tr | F6HET4 | F6HET4_VITVI |
| gi | 566178300 | ref | XP_002308647.2 |  | tr | F6H3T7 | F6H3T7_VITVI |
| gi | 566184073 | ref | XP_002311618.2 |  | tr | D7TDX6 | D7TDX6_VITVI |
| gi | 731440185 | ref | XP_010646096.1 |  | tr | F6I1X5 | F6I1X5_VITVI |
| gi | 225457458 | ref | XP_002265041.1 |  | tr | D7TXR6 | D7TXR6_VITVI |

|    |           |     |                |    |        |              |
|----|-----------|-----|----------------|----|--------|--------------|
| gi | 566207041 | ref | XP_002321728.2 | tr | A5BEM6 | A5BEM6_VITVI |
| gi | 566204499 | ref | XP_002320494.2 | tr | D7TEF8 | D7TEF8_VITVI |
| gi | 224129210 | ref | XP_002320528.1 | tr | F6HHQ7 | F6HHQ7_VITVI |
| gi | 224108938 | ref | XP_002315023.1 | tr | A5BZP4 | A5BZP4_VITVI |
| gi | 224104631 | ref | XP_002313506.1 | tr | D7TQA5 | D7TQA5_VITVI |
| gi | 224120174 | ref | XP_002318262.1 | tr | D7T1T9 | D7T1T9_VITVI |
| gi | 731394579 | ref | XP_010651886.1 | tr | F6HHG2 | F6HHG2_VITVI |
| gi | 731439997 | ref | XP_002268808.3 | tr | F6HCV4 | F6HCV4_VITVI |
| gi | 225464906 | ref | XP_002274381.1 | tr | D7TK38 | D7TK38_VITVI |
| gi | 566149444 | ref | XP_002299720.2 | tr | D7TCD6 | D7TCD6_VITVI |
| gi | 225455934 | ref | XP_002276967.1 | tr | A5C718 | A5C718_VITVI |
| gi | 731426684 | ref | XP_010663697.1 | tr | F6GSN7 | F6GSN7_VITVI |
| gi | 566175251 | ref | XP_002309064.2 | tr | F6HL96 | F6HL96_VITVI |
| gi | 225460716 | ref | XP_002271286.1 | tr | F6GY10 | F6GY10_VITVI |
| gi | 566195934 | ref | XP_006377983.1 | tr | D7UAQ2 | D7UAQ2_VITVI |
| gi | 224059670 | ref | XP_002299962.1 | tr | F6HB97 | F6HB97_VITVI |
| gi | 225444649 | ref | XP_002276749.1 | tr | Q6B4V4 | Q6B4V4_VITVI |
| gi | 225429209 | ref | XP_002272116.1 | tr | D7T3Q1 | D7T3Q1_VITVI |
| gi | 731428049 | ref | XP_010664203.1 | tr | A5B0X9 | A5B0X9_VITVI |
| gi | 566183513 | ref | XP_002312387.2 | tr | E0CQ39 | E0CQ39_VITVI |
| gi | 731430037 | ref | XP_002269356.2 | tr | E0CQB7 | E0CQB7_VITVI |
| gi | 731380214 | ref | XP_010662388.1 | tr | D7TN36 | D7TN36_VITVI |
| gi | 566170761 | ref | XP_006383073.1 | tr | D7SNV6 | D7SNV6_VITVI |
| gi | 731371455 | ref | XP_010648953.1 | tr | D7T9L8 | D7T9L8_VITVI |
| gi | 566185810 | ref | XP_002314274.2 | tr | D7SKW9 | D7SKW9_VITVI |
| gi | 731403303 | ref | XP_010655009.1 | tr | D7U865 | D7U865_VITVI |
| gi | 225448367 | ref | XP_002268645.1 | tr | F6HC03 | F6HC03_VITVI |
| gi | 731440862 | ref | XP_010646637.1 | tr | A5BD13 | A5BD13_VITVI |
| gi | 224104913 | ref | XP_002313617.1 | tr | D7SW25 | D7SW25_VITVI |
| gi | 225447176 | ref | XP_002276520.1 | tr | D7TEF8 | D7TEF8_VITVI |
| gi | 566170929 | ref | XP_006383152.1 | tr | F6GWS4 | F6GWS4_VITVI |
| gi | 224057272 | ref | XP_002299201.1 | tr | F6HVD5 | F6HVD5_VITVI |

|    |           |     |                |  |    |        |              |
|----|-----------|-----|----------------|--|----|--------|--------------|
| gi | 224131818 | ref | XP_002321186.1 |  | tr | A5ASG6 | A5ASG6_VITVI |
| gi | 731436956 | ref | XP_010647324.1 |  | tr | D7ST07 | D7ST07_VITVI |
| gi | 224078584 | ref | XP_002305564.1 |  | tr | F6H7L5 | F6H7L5_VITVI |
| gi | 225455106 | ref | XP_002265766.1 |  | tr | E0CVH6 | E0CVH6_VITVI |
| gi | 225460542 | ref | XP_002277226.1 |  | tr | F6GYT6 | F6GYT6_VITVI |
| gi | 225434323 | ref | XP_002265847.1 |  | tr | F6GU78 | F6GU78_VITVI |
| gi | 225453350 | ref | XP_002271352.1 |  | tr | A5B878 | A5B878_VITVI |
| gi | 671743260 | ref | YP_009050792.1 |  | sp | Q0ZIY9 | CYB6_VITVI   |
| gi | 225434277 | ref | XP_002262902.1 |  | tr | D7SJF5 | D7SJF5_VITVI |
| gi | 566202597 | ref | XP_002320883.2 |  | tr | A5B878 | A5B878_VITVI |
| gi | 224073967 | ref | XP_002304206.1 |  | tr | A5BHE6 | A5BHE6_VITVI |
| gi | 225452270 | ref | XP_002270233.1 |  | tr | F6HUS8 | F6HUS8_VITVI |
| gi | 225447707 | ref | XP_002277051.1 |  | tr | F6GXR1 | F6GXR1_VITVI |
| gi | 225435203 | ref | XP_002284863.1 |  | tr | F6HMK2 | F6HMK2_VITVI |
| gi | 225451247 | ref | XP_002276521.1 |  | tr | A5BH65 | A5BH65_VITVI |
| gi | 566160631 | ref | XP_006385363.1 |  | tr | A5BV91 | A5BV91_VITVI |
| gi | 566174518 | ref | XP_002308027.2 |  | tr | F6HKZ2 | F6HKZ2_VITVI |
| gi | 526118093 | ref | NP_001268192.1 |  | tr | F6HKH2 | F6HKH2_VITVI |
| gi | 731428733 | ref | XP_010664436.1 |  | tr | F6H151 | F6H151_VITVI |
| gi | 731389447 | ref | XP_010649982.1 |  | tr | D7T777 | D7T777_VITVI |
| gi | 566205838 | ref | XP_002322112.2 |  | tr | F6GSN7 | F6GSN7_VITVI |
| gi | 225435878 | ref | XP_002264840.1 |  | tr | D7T1A7 | D7T1A7_VITVI |
| gi | 224084784 | ref | XP_002307405.1 |  | tr | F6H0N8 | F6H0N8_VITVI |
| gi | 566168995 | ref | XP_006382473.1 |  | tr | D7U9U6 | D7U9U6_VITVI |
| gi | 225437898 | ref | XP_002266424.1 |  | tr | F6HZU4 | F6HZU4_VITVI |
| gi | 224078826 | ref | XP_002305643.1 |  | tr | F6H8B4 | F6H8B4_VITVI |
| gi | 224107655 | ref | XP_002314551.1 |  | tr | D7TAP7 | D7TAP7_VITVI |
| gi | 225465441 | ref | XP_002265677.1 |  | tr | A5ATD8 | A5ATD8_VITVI |
| gi | 225449234 | ref | XP_002280039.1 |  | tr | A5C3V1 | A5C3V1_VITVI |
| gi | 566183164 | ref | XP_002311347.2 |  | tr | D7SMC3 | D7SMC3_VITVI |
| gi | 224089062 | ref | XP_002308619.1 |  | tr | D7SKV3 | D7SKV3_VITVI |
| gi | 224109088 | ref | XP_002315079.1 |  | tr | F6H9T6 | F6H9T6_VITVI |



|    |           |     |                |    |        |              |
|----|-----------|-----|----------------|----|--------|--------------|
| gi | 526117942 | ref | NP_001268153.1 | tr | F6HLL8 | F6HLL8_VITVI |
| gi | 359475330 | ref | XP_003631658.1 | tr | F6HQM5 | F6HQM5_VITVI |
| gi | 566150510 | ref | XP_002299649.2 | tr | F6HAD6 | F6HAD6_VITVI |
| gi | 566167266 | ref | XP_002306207.2 | tr | F6IOW9 | F6IOW9_VITVI |
| gi | 225454123 | ref | XP_002269748.1 | tr | F6I6I8 | F6I6I8_VITVI |
| gi | 224107333 | ref | XP_002314449.1 | tr | F6HZ31 | F6HZ31_VITVI |
| gi | 731408423 | ref | XP_010656847.1 | tr | F6GXH6 | F6GXH6_VITVI |
| gi | 566210985 | ref | XP_006372566.1 | tr | D7TSK7 | D7TSK7_VITVI |
| gi | 224109362 | ref | XP_002315172.1 | tr | D7TMG2 | D7TMG2_VITVI |
| gi | 224124892 | ref | XP_002319448.1 | tr | Q0MYQ7 | Q0MYQ7_VITVI |
| gi | 225458237 | ref | XP_002282021.1 | tr | A5C3G7 | A5C3G7_VITVI |
| gi | 225440849 | ref | XP_002282193.1 | tr | D7TJ87 | D7TJ87_VITVI |
| gi | 225439775 | ref | XP_002275882.1 | tr | D7TQB0 | D7TQB0_VITVI |
| gi | 566239233 | ref | XP_002325506.2 | tr | D7TL78 | D7TL78_VITVI |
| gi | 731426021 | ref | XP_010663458.1 | tr | D7SMC3 | D7SMC3_VITVI |
| gi | 731407226 | ref | XP_002285167.2 | tr | D7TC06 | D7TC06_VITVI |
| gi | 526118000 | ref | NP_001267914.1 | tr | Q0MYQ7 | Q0MYQ7_VITVI |
| gi | 224084852 | ref | XP_002307422.1 | tr | E0CRB0 | E0CRB0_VITVI |
| gi | 225448536 | ref | XP_002276751.1 | tr | F6HC61 | F6HC61_VITVI |
| gi | 225435608 | ref | XP_002285629.1 | tr | F6GUE5 | F6GUE5_VITVI |
| gi | 566185913 | ref | XP_002314250.2 | tr | D7T1P6 | D7T1P6_VITVI |
| gi | 225451318 | ref | XP_002273776.1 | tr | D7TUJ9 | D7TUJ9_VITVI |
| gi | 224112341 | ref | XP_002316158.1 | tr | F6H9S5 | F6H9S5_VITVI |
| gi | 731384053 | ref | XP_010647988.1 | tr | F6HBK3 | F6HBK3_VITVI |
| gi | 566189043 | ref | XP_006378181.1 | tr | F6HPJ9 | F6HPJ9_VITVI |
| gi | 566187444 | ref | XP_002313825.2 | tr | F6HQI3 | F6HQI3_VITVI |
| gi | 566184421 | ref | XP_002312594.2 | tr | F6H8S2 | F6H8S2_VITVI |
| gi | 359496589 | ref | XP_003635272.1 | tr | F6HWS4 | F6HWS4_VITVI |
| gi | 225457361 | ref | XP_002284772.1 | tr | F6GT65 | F6GT65_VITVI |
| gi | 224070184 | ref | XP_002303134.1 | tr | E0CQ38 | E0CQ38_VITVI |
| gi | 566151403 | ref | XP_006369651.1 | tr | D7T1A7 | D7T1A7_VITVI |
| gi | 225435002 | ref | XP_002281193.1 | tr | F6GV28 | F6GV28_VITVI |

|    |           |     |                |  |    |        |              |
|----|-----------|-----|----------------|--|----|--------|--------------|
| gi | 359491781 | ref | XP_002266302.2 |  | tr | F6HW68 | F6HW68_VITVI |
| gi | 566152777 | ref | XP_002300023.2 |  | tr | D7TWV6 | D7TWV6_VITVI |
| gi | 731411254 | ref | XP_010657906.1 |  | tr | F6HJZ4 | F6HJZ4_VITVI |
| gi | 225428420 | ref | XP_002283830.1 |  | tr | A5BRH6 | A5BRH6_VITVI |
| gi | 225432296 | ref | XP_002273224.1 |  | tr | D7T6F0 | D7T6F0_VITVI |
| gi | 224130034 | ref | XP_002320736.1 |  | tr | F6I327 | F6I327_VITVI |
| gi | 224137260 | ref | XP_002322513.1 |  | tr | D7T881 | D7T881_VITVI |
| gi | 526117629 | ref | NP_001268074.1 |  | tr | F6GXX3 | F6GXX3_VITVI |
| gi | 566186111 | ref | XP_006379014.1 |  | tr | F6HNP2 | F6HNP2_VITVI |
| gi | 225443988 | ref | XP_002280687.1 |  | tr | F6HLW0 | F6HLW0_VITVI |
| gi | 359494267 | ref | XP_002266007.2 |  | tr | F6HR77 | F6HR77_VITVI |
| gi | 566167359 | ref | XP_006384619.1 |  | tr | F6GZC5 | F6GZC5_VITVI |
| gi | 224070843 | ref | XP_002303260.1 |  | tr | D7U0W6 | D7U0W6_VITVI |
| gi | 566210973 | ref | XP_006372560.1 |  | tr | A5BIM9 | A5BIM9_VITVI |

**Table S10 KEGG pathways mapped by differentially expressed proteins between CK1 and HY1**

| Term                                        | Input number | Background number | Corrected P value | Pathway ID |
|---------------------------------------------|--------------|-------------------|-------------------|------------|
| Ribosome                                    | 16           | 256               | 0.001225464       | vvi03010   |
| Photosynthesis                              | 9            | 84                | 0.001225464       | vvi00195   |
| Photosynthesis - antenna proteins           | 5            | 19                | 0.001225464       | vvi00196   |
| Glyoxylate and dicarboxylate metabolism     | 3            | 49                | 0.752846803       | vvi00630   |
| Limonene and pinene degradation             | 1            | 5                 | 0.752846803       | vvi00903   |
| C5-Branched dibasic acid metabolism         | 1            | 6                 | 0.752846803       | vvi00660   |
| Histidine metabolism                        | 1            | 8                 | 0.752846803       | vvi00340   |
| Fructose and mannose metabolism             | 2            | 38                | 0.752846803       | vvi00051   |
| Lysine degradation                          | 1            | 11                | 0.752846803       | vvi00310   |
| Valine, leucine and isoleucine biosynthesis | 1            | 11                | 0.752846803       | vvi00290   |
| Glycine, serine and threonine metabolism    | 2            | 45                | 0.752846803       | vvi00260   |
| One carbon pool by folate                   | 1            | 14                | 0.752846803       | vvi00670   |
| Carbon fixation in photosynthetic organism  | 2            | 52                | 0.752846803       | vvi00710   |
| Pyruvate metabolism                         | 2            | 52                | 0.752846803       | vvi00620   |
| Tryptophan metabolism                       | 1            | 16                | 0.752846803       | vvi00380   |
| Cysteine and methionine metabolism          | 2            | 55                | 0.752846803       | vvi00270   |
| Biosynthesis of amino acids                 | 4            | 146               | 0.752846803       | vvi01230   |
| Mismatch repair                             | 1            | 20                | 0.752846803       | vvi03430   |
| Homologous recombination                    | 1            | 21                | 0.752846803       | vvi03440   |
| Valine, leucine and isoleucine degradation  | 1            | 22                | 0.752846803       | vvi00280   |
| Carbon metabolism                           | 4            | 156               | 0.752846803       | vvi01200   |
| Fatty acid degradation                      | 1            | 24                | 0.752846803       | vvi00071   |
| Ascorbate and aldarate metabolism           | 1            | 24                | 0.752846803       | vvi00053   |
| Sulfur metabolism                           | 1            | 25                | 0.752846803       | vvi00920   |
| DNA replication                             | 1            | 26                | 0.752846803       | vvi03030   |
| Glycolysis / Gluconeogenesis                | 2            | 74                | 0.752846803       | vvi00010   |
| beta-Alanine metabolism                     | 1            | 29                | 0.752846803       | vvi00410   |
| Aminoacyl-tRNA biosynthesis                 | 1            | 31                | 0.752846803       | vvi00970   |
| 2-Oxocarboxylic acid metabolism             | 1            | 34                | 0.752846803       | vvi01210   |
| Pentose phosphate pathway                   | 1            | 34                | 0.752846803       | vvi00030   |

|                                             |    |      |             |          |
|---------------------------------------------|----|------|-------------|----------|
| Cyanoamino acid metabolism                  | 1  | 34   | 0.752846803 | vvi00460 |
| Glycerolipid metabolism                     | 1  | 36   | 0.752846803 | vvi00561 |
| Citrate cycle (TCA cycle)                   | 1  | 36   | 0.752846803 | vvi00020 |
| Nucleotide excision repair                  | 1  | 37   | 0.752846803 | vvi03420 |
| Protein processing in endoplasmic reticulum | 3  | 143  | 0.752846803 | vvi04141 |
| Metabolic pathways                          | 23 | 1197 | 0.752846803 | vvi01100 |
| Starch and sucrose metabolism               | 2  | 97   | 0.752846803 | vvi00500 |
| Pentose and glucuronate interconversions    | 1  | 43   | 0.752846803 | vvi00040 |
| Arginine and proline metabolism             | 1  | 48   | 0.784173544 | vvi00330 |
| Pyrimidine metabolism                       | 1  | 62   | 0.858056868 | vvi00240 |
| Flavonoid biosynthesis                      | 1  | 65   | 0.858056868 | vvi00941 |
| Endocytosis                                 | 1  | 65   | 0.858056868 | vvi04144 |
| Phenylalanine metabolism                    | 1  | 81   | 0.877642959 | vvi00360 |
| Glutathione metabolism                      | 1  | 82   | 0.877642959 | vvi00480 |
| Purine metabolism                           | 1  | 83   | 0.877642959 | vvi00230 |
| Amino sugar and nucleotide sugar metabolism | 1  | 87   | 0.877642959 | vvi00520 |
| Spliceosome                                 | 1  | 89   | 0.877642959 | vvi03040 |
| Phenylpropanoid biosynthesis                | 1  | 107  | 0.904528066 | vvi00940 |
| Biosynthesis of secondary metabolites       | 9  | 644  | 0.904528066 | vvi01110 |
| Oxidative phosphorylation                   | 1  | 120  | 0.904528066 | vvi00190 |

**Table S11 KEGG pathways mapped by differentially expressed proteins between CK2 and HY2**

| Term                                        | Input number | Background number | Corrected P value | ID       |
|---------------------------------------------|--------------|-------------------|-------------------|----------|
| Carbon metabolism                           | 22           | 156               | 0.001632539       | vvi01200 |
| Carbon fixation in photosynthetic organisms | 11           | 52                | 0.004375366       | vvi00710 |
| Photosynthesis                              | 13           | 84                | 0.009634559       | vvi00195 |
| Glycolysis / Gluconeogenesis                | 12           | 74                | 0.009634559       | vvi00010 |
| Pyruvate metabolism                         | 8            | 52                | 0.08171715        | vvi00620 |
| Propanoate metabolism                       | 3            | 11                | 0.265191727       | vvi00640 |
| Glyoxylate and dicarboxylate metabolism     | 6            | 49                | 0.335115825       | vvi00630 |
| One carbon pool by folate                   | 3            | 14                | 0.335115825       | vvi00670 |
| Tryptophan metabolism                       | 3            | 16                | 0.39643069        | vvi00380 |
| Lysine biosynthesis                         | 2            | 7                 | 0.39928269        | vvi00300 |
| Histidine metabolism                        | 2            | 8                 | 0.437328944       | vvi00340 |
| Glycine, serine and threonine metabolism    | 5            | 45                | 0.437328944       | vvi00260 |
| Pentose phosphate pathway                   | 4            | 34                | 0.450517474       | vvi00030 |
| Citrate cycle (TCA cycle)                   | 4            | 36                | 0.450517474       | vvi00020 |
| Biosynthesis of amino acids                 | 11           | 146               | 0.450517474       | vvi01230 |
| RNA degradation                             | 5            | 51                | 0.450517474       | vvi03018 |
| Lysine degradation                          | 2            | 11                | 0.450517474       | vvi00310 |
| Ascorbate and aldarate metabolism           | 3            | 24                | 0.456905882       | vvi00053 |
| beta-Alanine metabolism                     | 3            | 29                | 0.622148487       | vvi00410 |
| Limonene and pinene degradation             | 1            | 5                 | 0.788503056       | vvi00903 |
| Porphyrin and chlorophyll metabolism        | 3            | 36                | 0.826401313       | vvi00860 |
| Valine, leucine and isoleucine degradation  | 2            | 22                | 0.882598879       | vvi00280 |
| Fatty acid biosynthesis                     | 2            | 24                | 0.882598879       | vvi00061 |
| Fatty acid degradation                      | 2            | 24                | 0.882598879       | vvi00071 |
| Metabolic pathways                          | 62           | 1197              | 0.882598879       | vvi01100 |
| Purine metabolism                           | 5            | 83                | 0.882598879       | vvi00230 |
| Amino sugar and nucleotide sugar metabolism | 5            | 87                | 0.882598879       | vvi00520 |
| Biotin metabolism                           | 1            | 12                | 0.882598879       | vvi00780 |
| Alanine, aspartate and glutamate metabolism | 2            | 33                | 0.882598879       | vvi00250 |

|                                                        |    |     |             |          |
|--------------------------------------------------------|----|-----|-------------|----------|
| Cysteine and methionine metabolism                     | 3  | 55  | 0.882598879 | vvi00270 |
| Butanoate metabolism                                   | 1  | 15  | 0.882598879 | vvi00650 |
| Glycerolipid metabolism                                | 2  | 36  | 0.882598879 | vvi00561 |
| Isoquinoline alkaloid biosynthesis                     | 1  | 16  | 0.882598879 | vvi00950 |
| Protein processing in endoplasmic reticulum            | 7  | 143 | 0.882598879 | vvi04141 |
| Fructose and mannose metabolism                        | 2  | 38  | 0.882598879 | vvi00051 |
| Galactose metabolism                                   | 2  | 38  | 0.882598879 | vvi00052 |
| Biosynthesis of secondary metabolites                  | 31 | 644 | 0.882598879 | vvi01110 |
| Tropane, piperidine and pyridine alkaloid biosynthesis | 1  | 17  | 0.882598879 | vvi00960 |
| Fatty acid metabolism                                  | 2  | 41  | 0.882598879 | vvi01212 |
| Proteasome                                             | 2  | 41  | 0.882598879 | vvi03050 |
| Ribosome                                               | 12 | 256 | 0.882598879 | vvi03010 |
| Biosynthesis of unsaturated fatty acids                | 1  | 19  | 0.882598879 | vvi01040 |
| Photosynthesis - antenna proteins                      | 1  | 19  | 0.882598879 | vvi00196 |
| Inositol phosphate metabolism                          | 1  | 19  | 0.882598879 | vvi00562 |
| Pentose and glucuronate interconversions               | 2  | 43  | 0.882598879 | vvi00040 |
| RNA transport                                          | 4  | 91  | 0.89913987  | vvi03013 |
| Arginine and proline metabolism                        | 2  | 48  | 0.89913987  | vvi00330 |
| Starch and sucrose metabolism                          | 4  | 97  | 0.89913987  | vvi00500 |
| Oxidative phosphorylation                              | 5  | 120 | 0.89913987  | vvi00190 |
| Sulfur metabolism                                      | 1  | 25  | 0.89913987  | vvi00920 |
| mRNA surveillance pathway                              | 2  | 54  | 0.90203373  | vvi03015 |
| Tyrosine metabolism                                    | 1  | 28  | 0.90203373  | vvi00350 |
| Phenylalanine metabolism                               | 3  | 81  | 0.90203373  | vvi00360 |
| Phenylalanine, tyrosine and tryptophan biosynthesis    | 1  | 30  | 0.90203373  | vvi00400 |
| Protein export                                         | 1  | 32  | 0.90203373  | vvi03060 |
| Cyanoamino acid metabolism                             | 1  | 34  | 0.90203373  | vvi00460 |
| Phagosome                                              | 2  | 63  | 0.90203373  | vvi04145 |
| alpha-Linolenic acid metabolism                        | 1  | 37  | 0.911817697 | vvi00592 |
| Phenylpropanoid biosynthesis                           | 3  | 107 | 0.950922744 | vvi00940 |

|                       |   |    |             |          |
|-----------------------|---|----|-------------|----------|
| Peroxisome            | 1 | 48 | 0.950922744 | vvi04146 |
| Spliceosome           | 2 | 89 | 0.958572493 | vvi03040 |
| Pyrimidine metabolism | 1 | 62 | 0.958572493 | vvi00240 |
| Endocytosis           | 1 | 65 | 0.958572493 | vvi04144 |

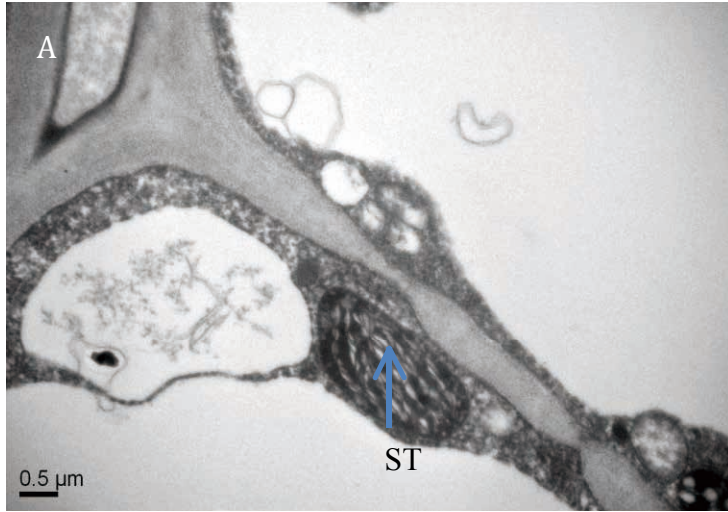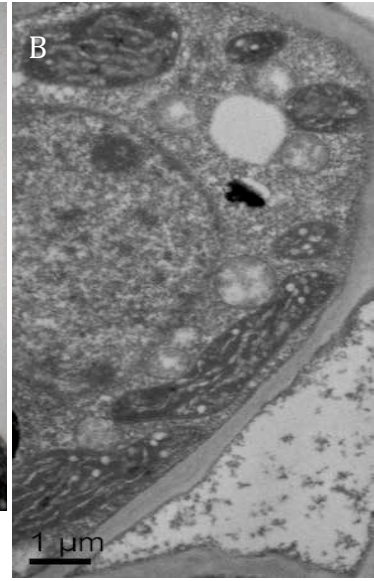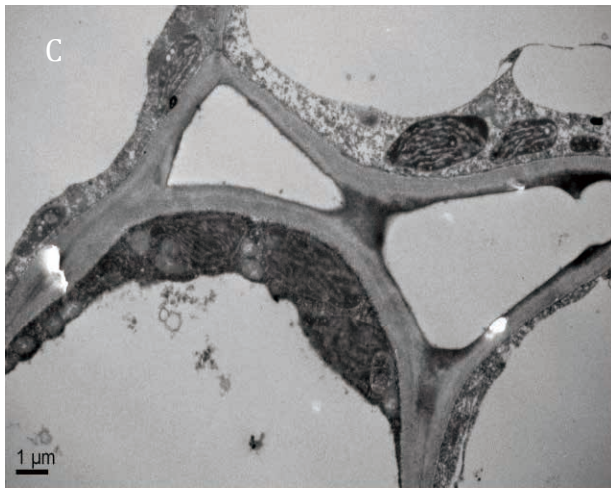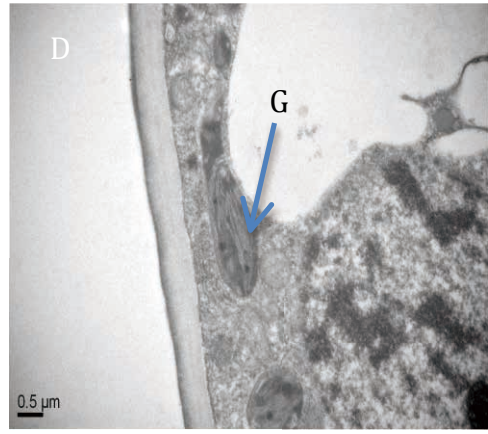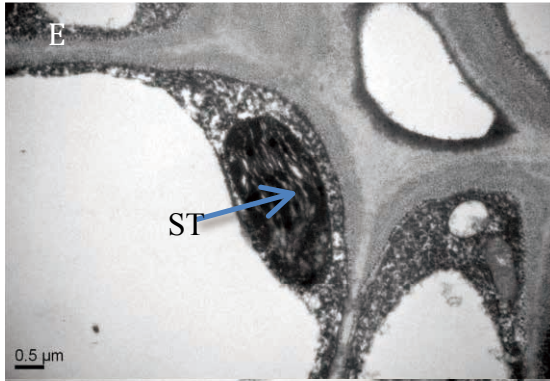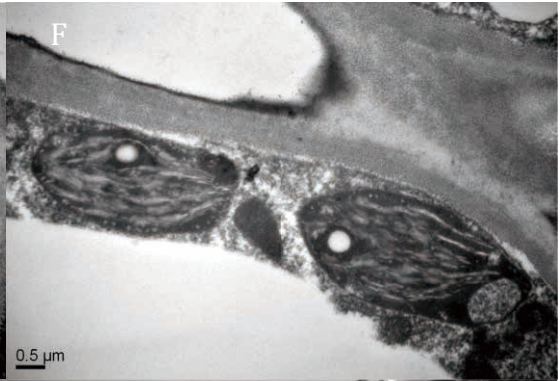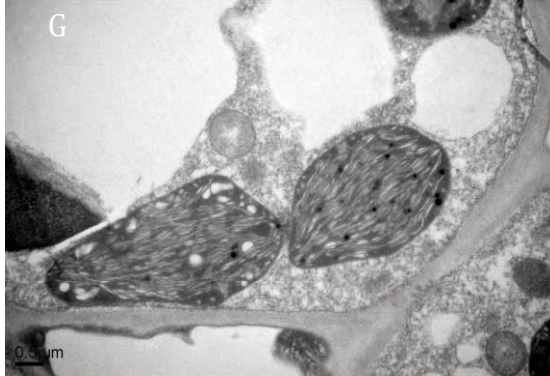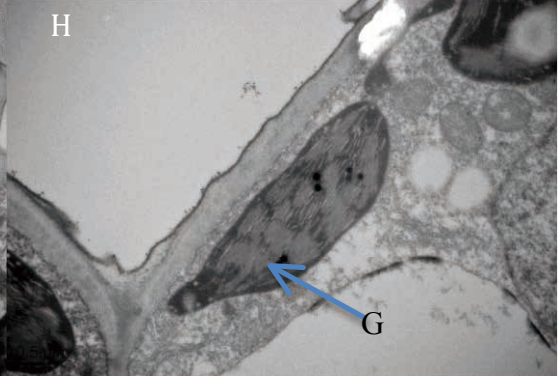



Fig. S1 Chloroplast ultrastructure of two kinds of mutants with different maturity. A-D, chloroplast ultrastructure of HY1 from first leaf to forth leaf; E-H, chloroplast ultrastructure of HY2 from first leaf to forth leaf. ST refers to swelling thylakoid; G refers to grana.

gi | 224064818

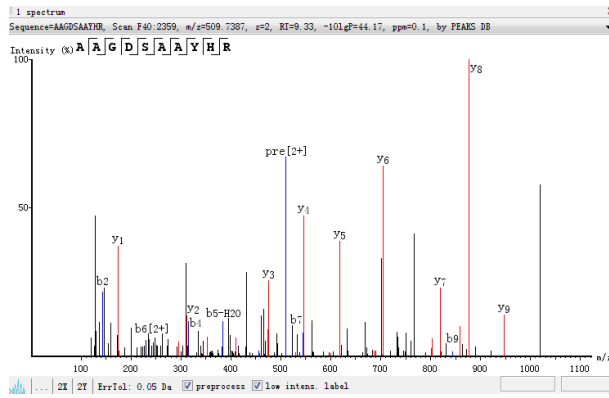

gi | 224071575

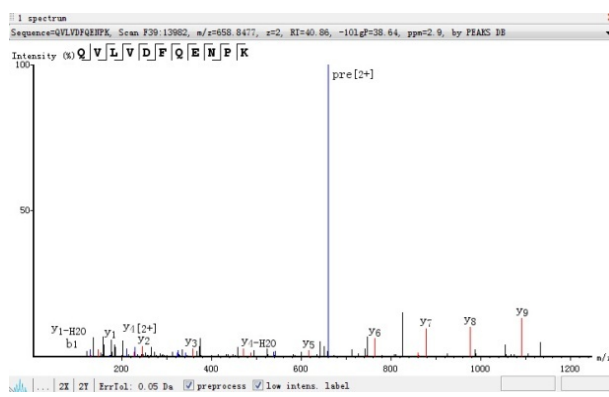

gi | 224086345

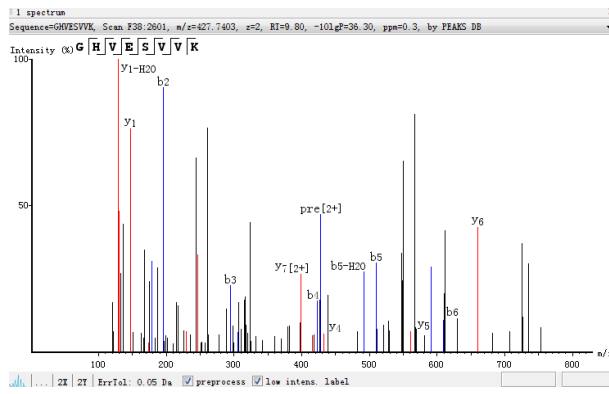

gi | 224093204

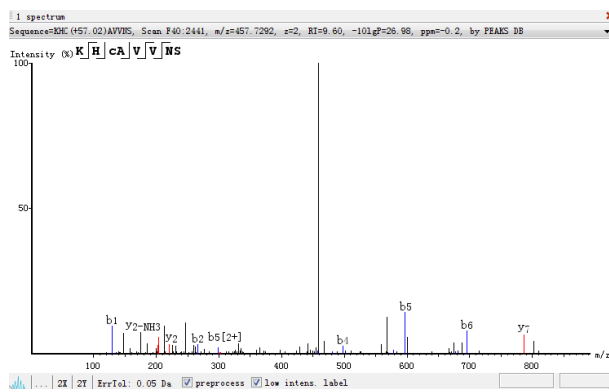

gi | 224104643

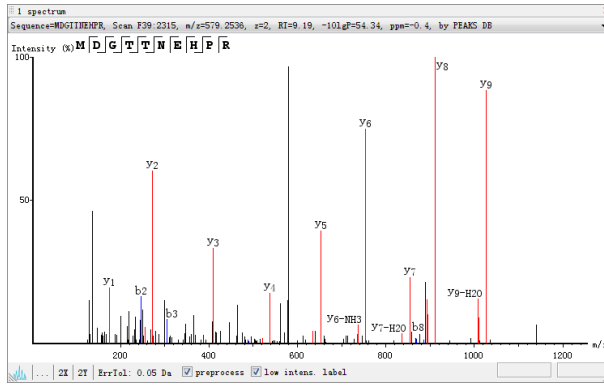

gi | 224113315

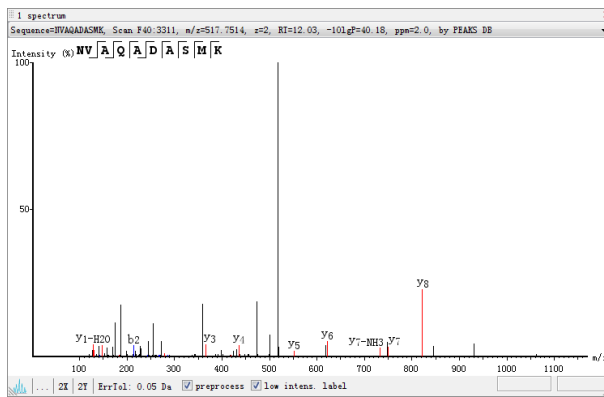

gi | 224122632

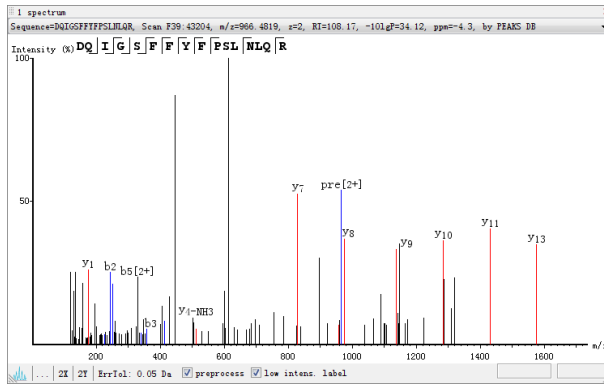

gi | 224138170

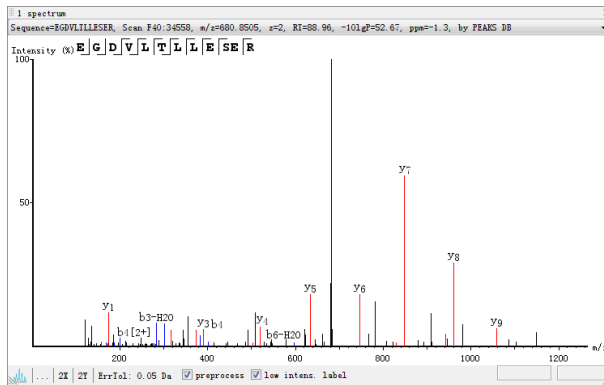

gi | 224143559

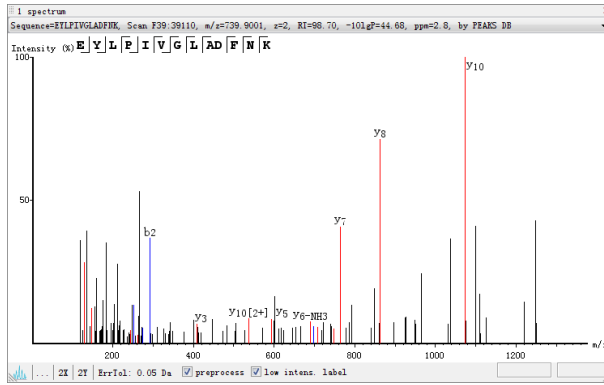

gi | 224144643

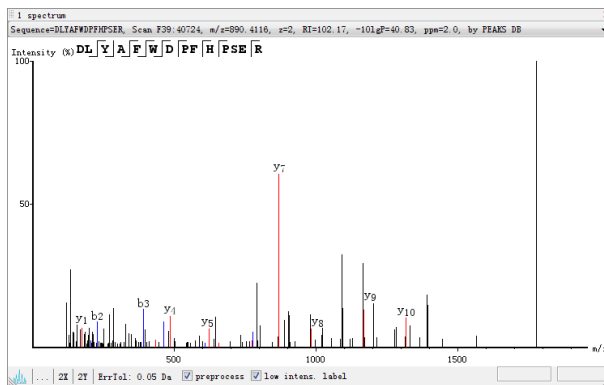

gi | 224145285

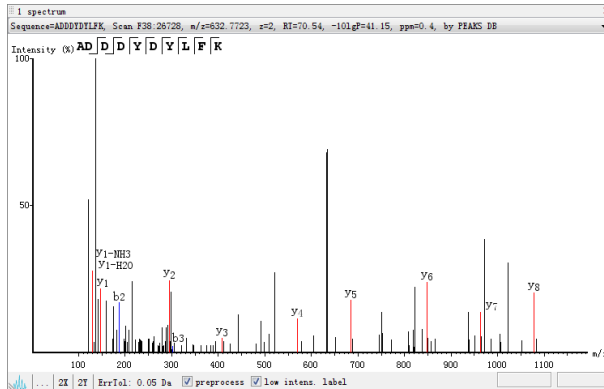

gi | 224145927

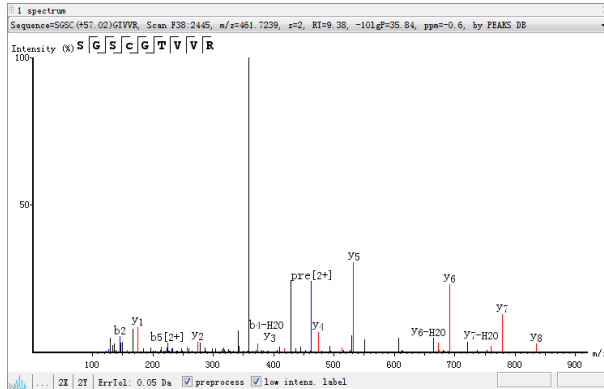

gi | 225424881

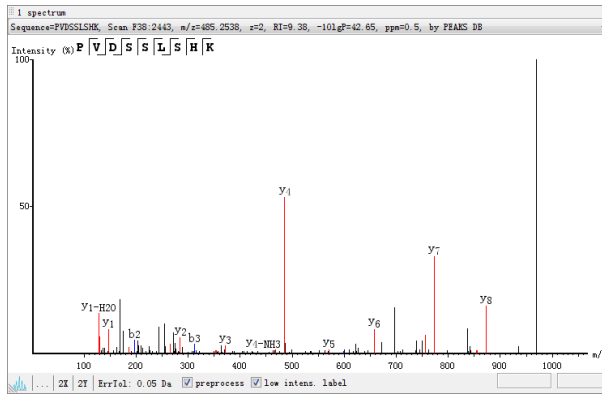

gi | 225427782

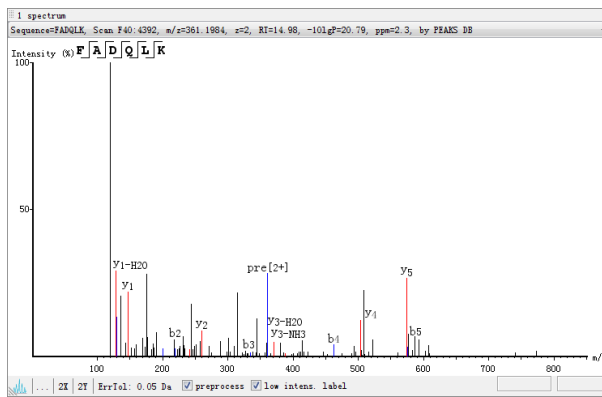

gi | 225429850

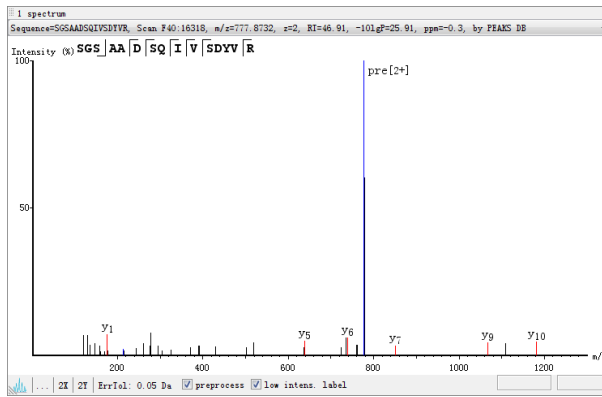

gi | 224107257

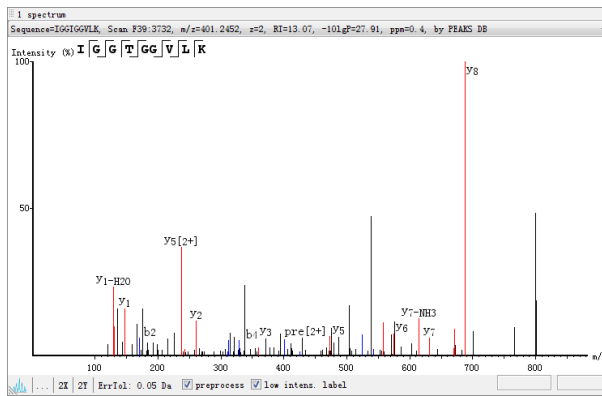

gi | 225430510

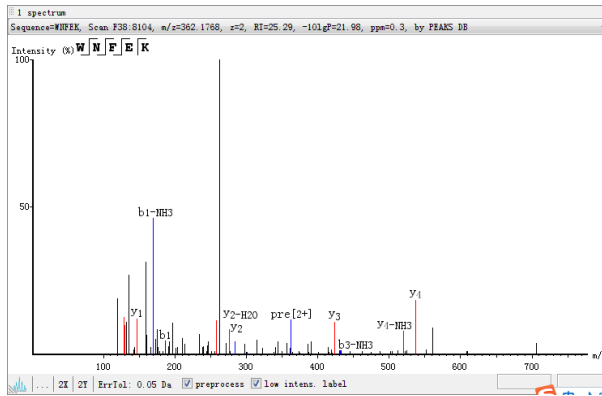

gi | 225430549

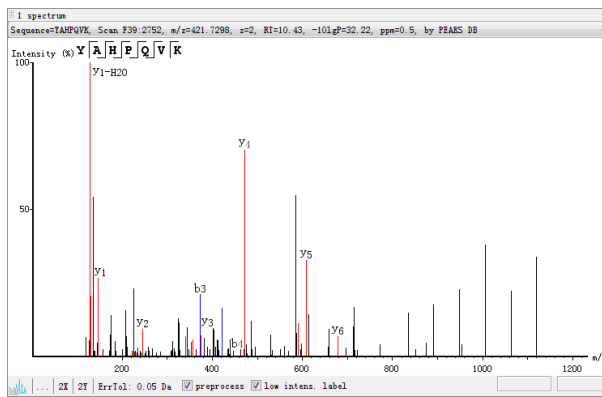

gi | 225433215

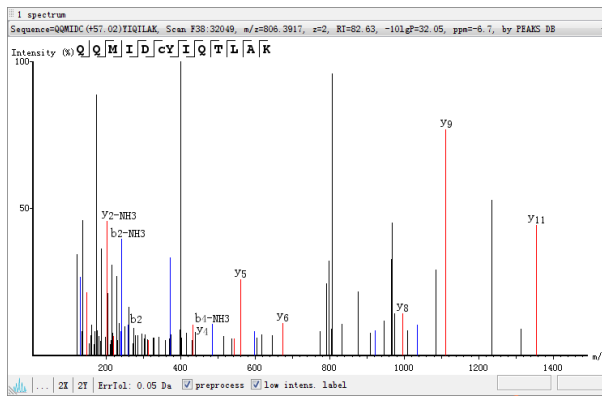

gi | 225434808

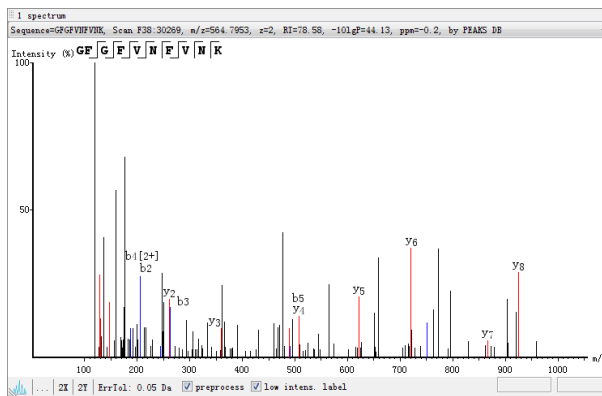

gi | 225435480

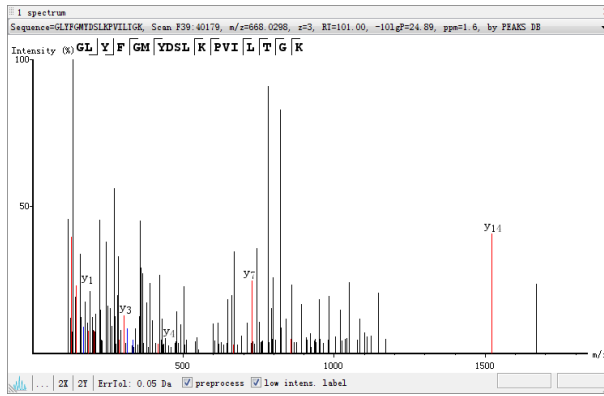

gi | 225435931

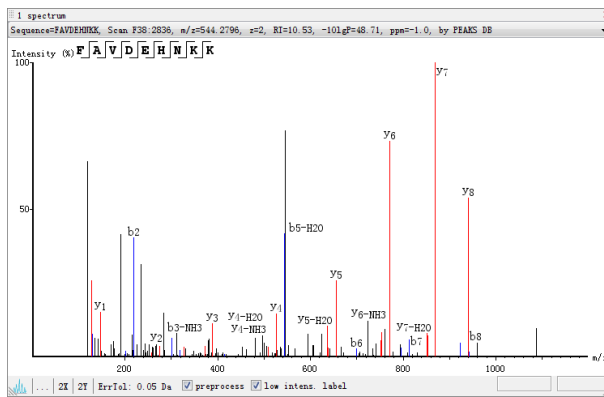

gi | 225436843

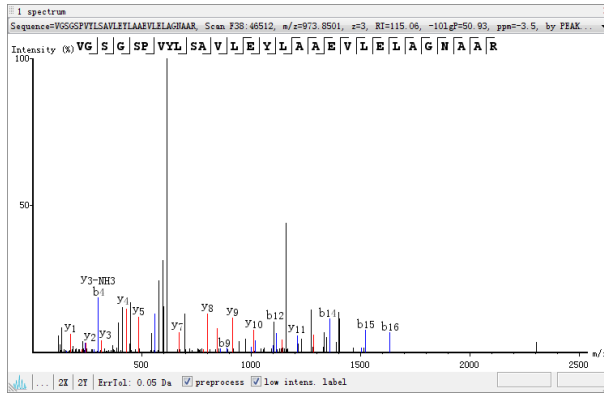

gi | 225437028

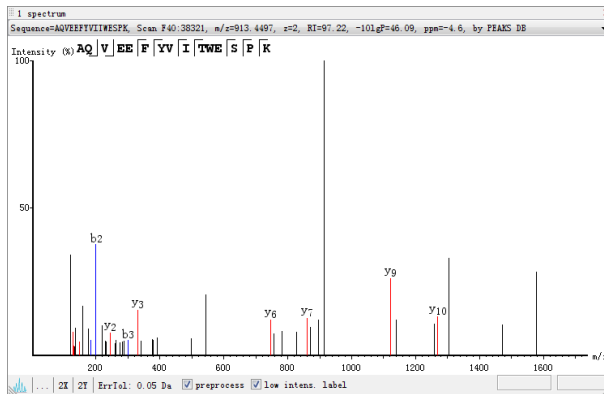

gi | 225438067

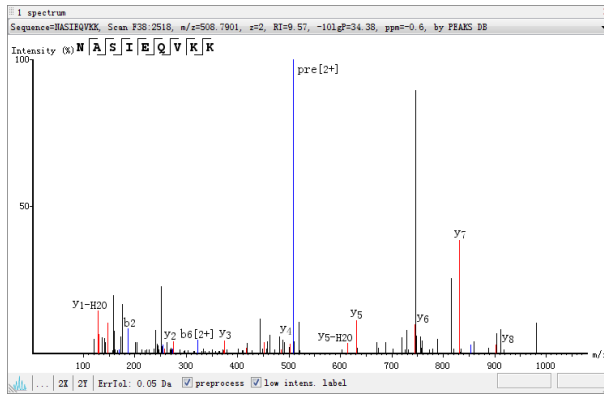

gi | 225441044

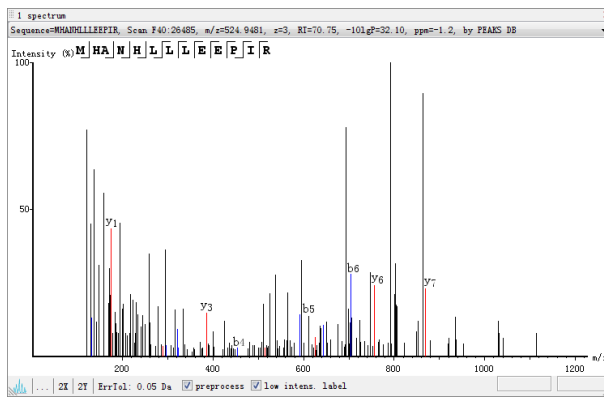

gi | 225442434

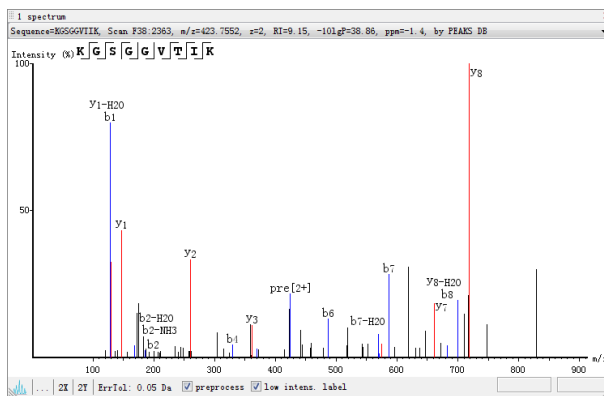

gi | 225442595

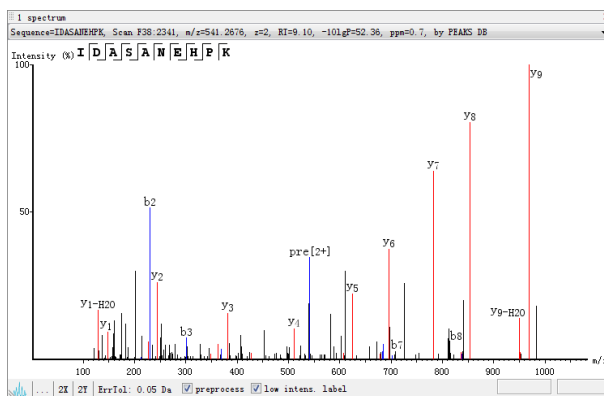



gi | 225443827

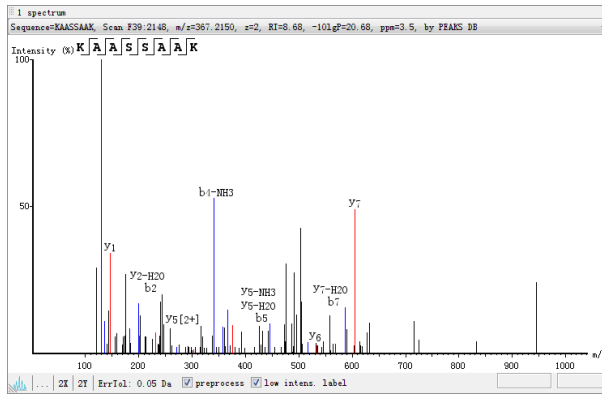

gi | 225444609

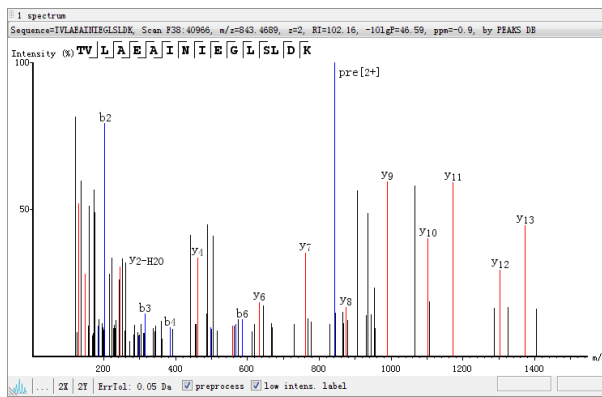

gi | 225444938

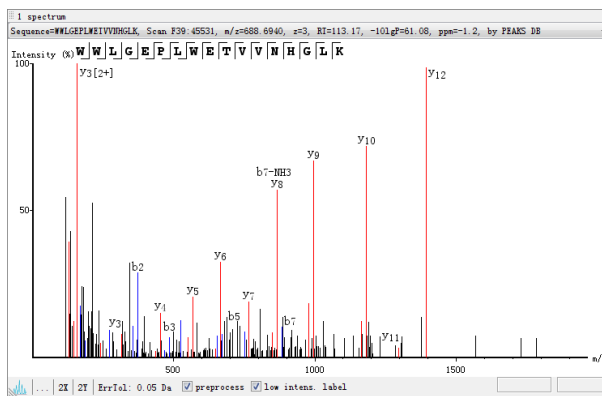

gi | 225445664

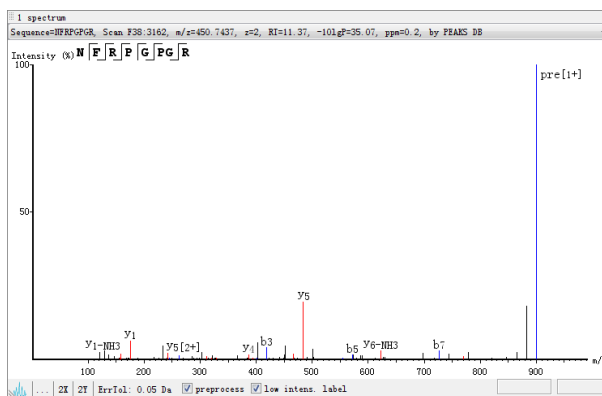

gi | 225446625

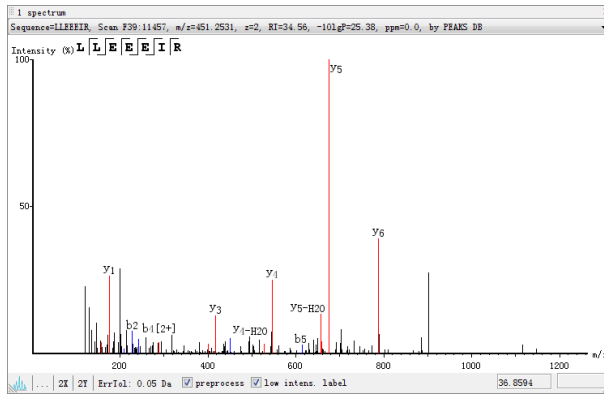

gi | 225449380

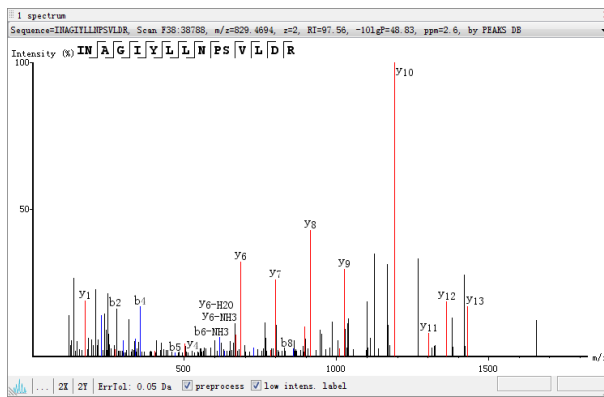

gi | 225450051

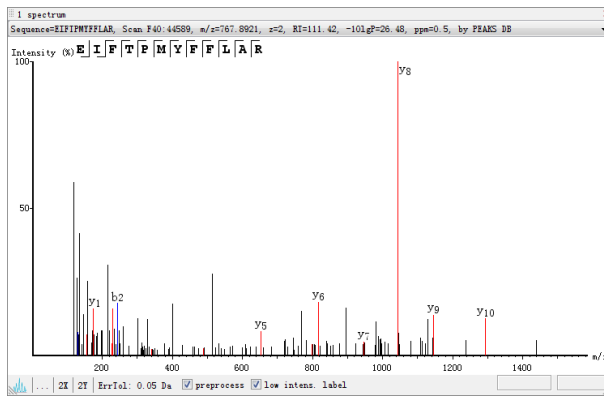

gi | 225450626

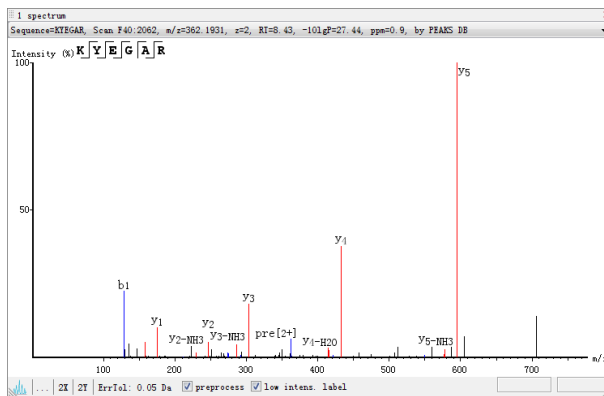

gi | 225454009

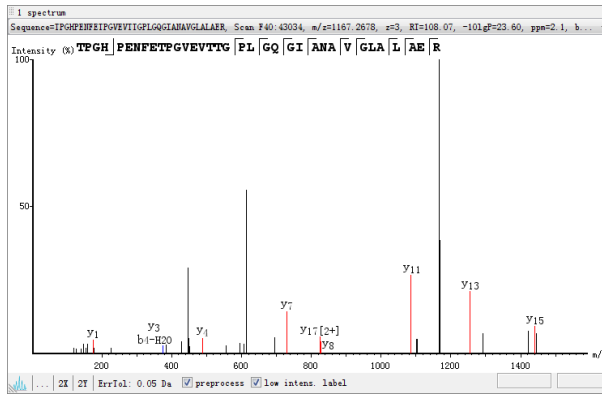

gi | 225455762

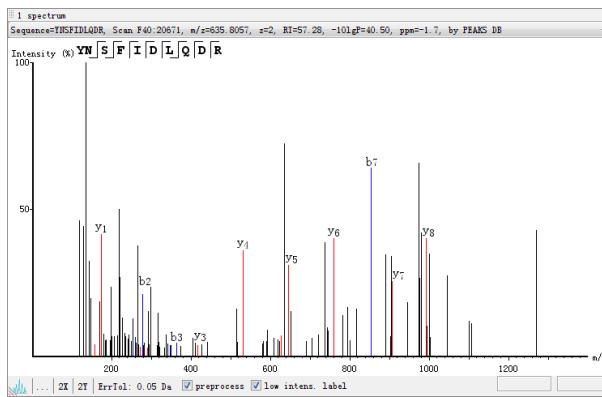

gi | 225456481

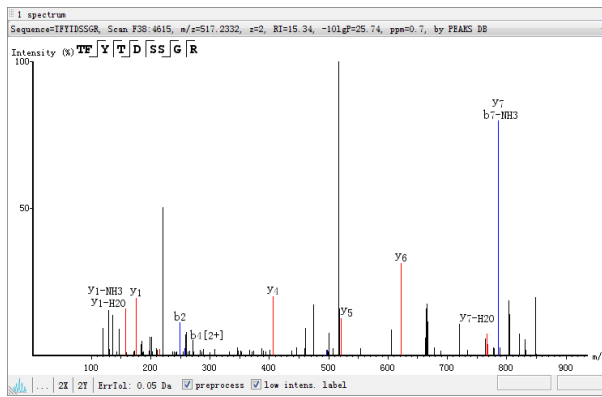

gi | 225457152

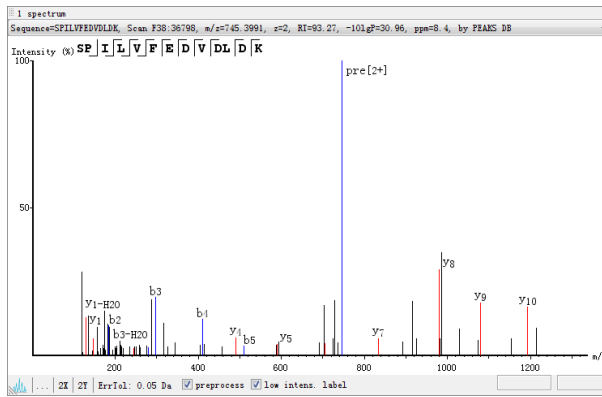

gi | 225458111

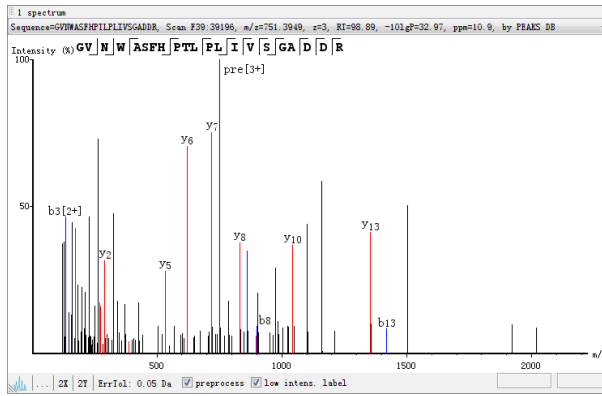

gi | 225458173

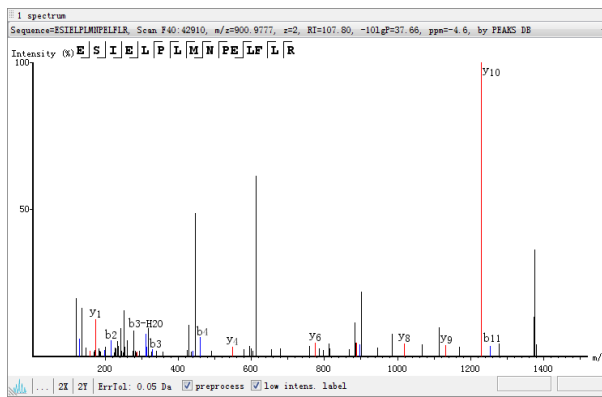

gi | 225459318

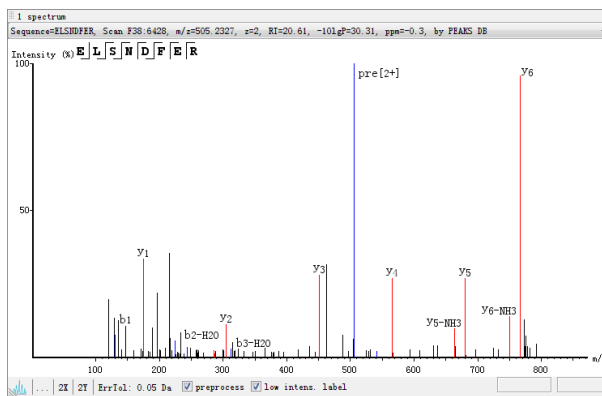

gi | 225459806

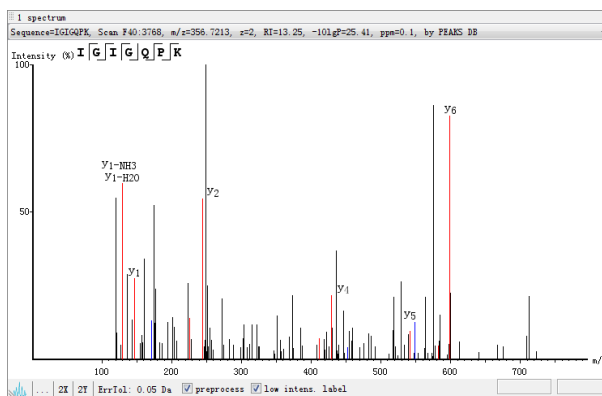

gi | 225460328

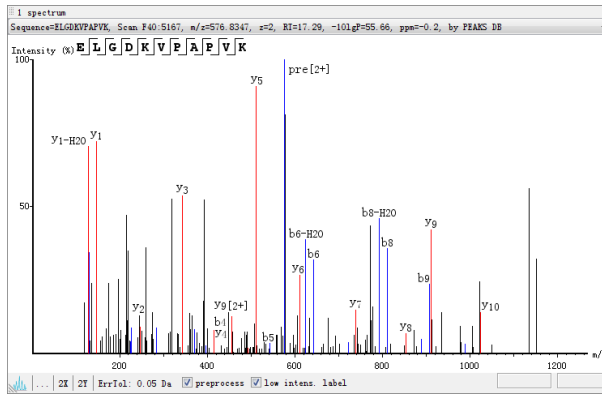

gi | 225465030

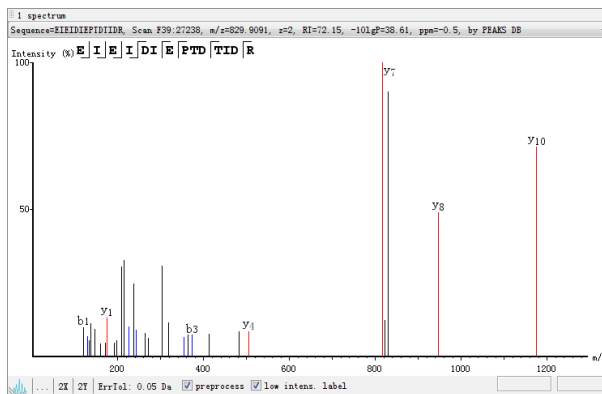

gi | 225465605

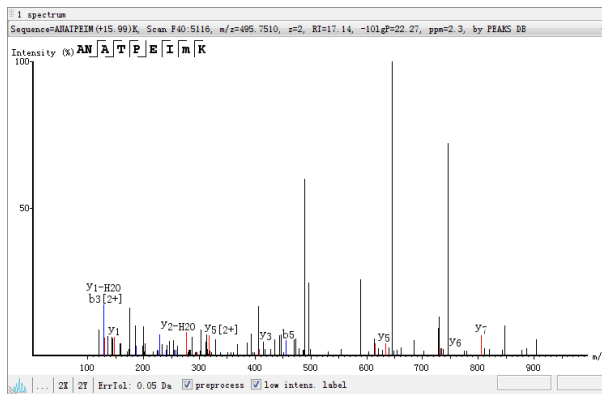

gi | 225469850

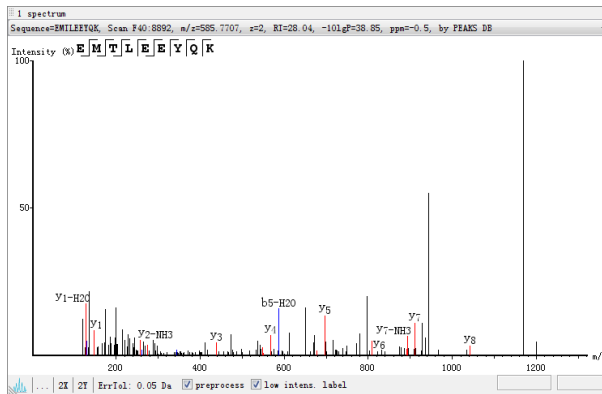

gi | 359487009

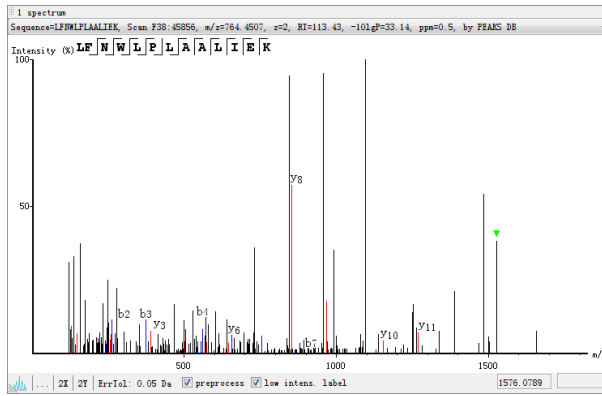

gi | 359495476

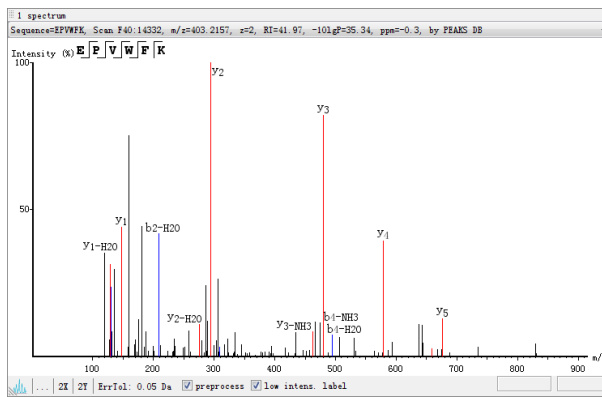

gi | 526118004

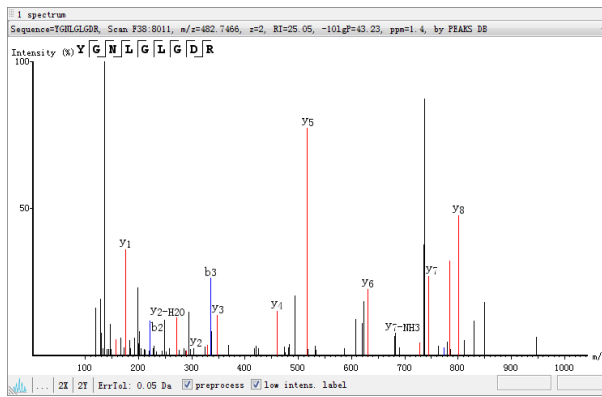

gi | 552541020

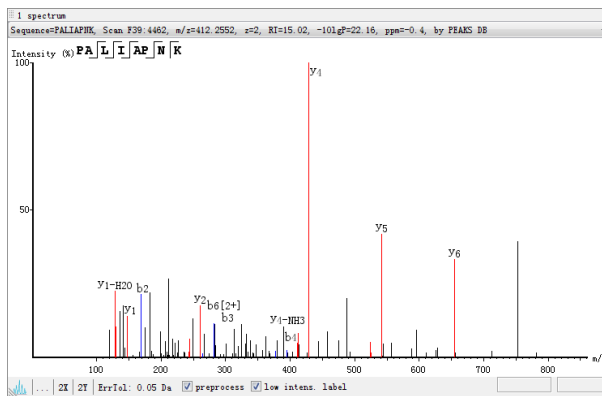

gi | 566147298

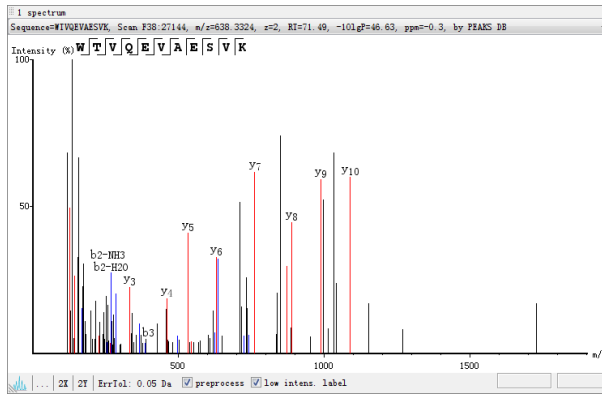

gi | 566149517

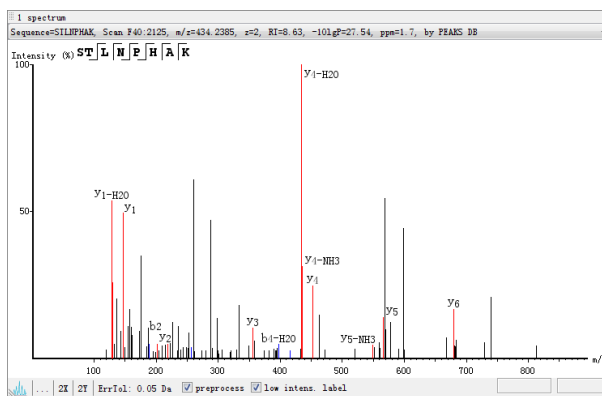

gi | 566152742

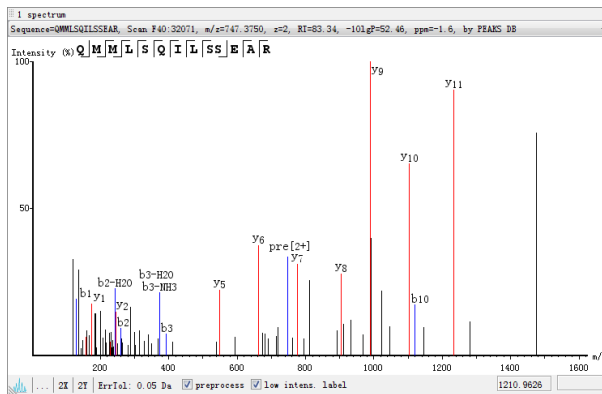

gi | 566152765

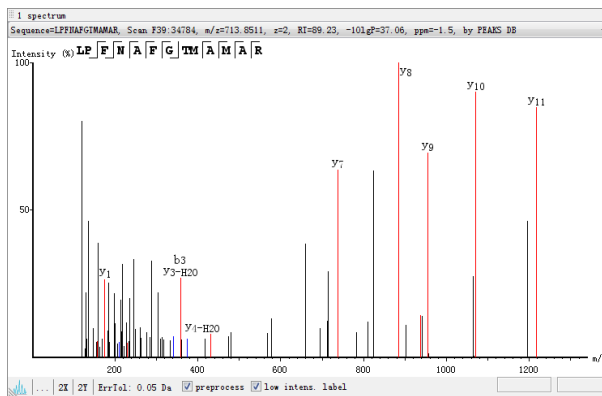

gi | 566153407

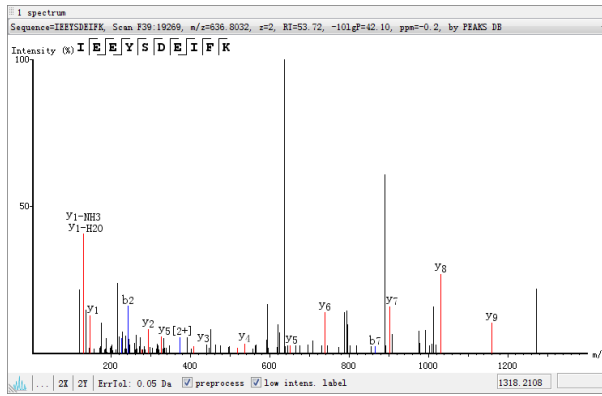

gi | 566155466

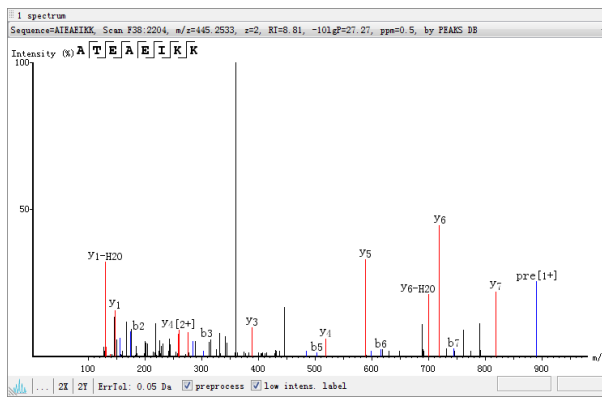

gi | 566158761

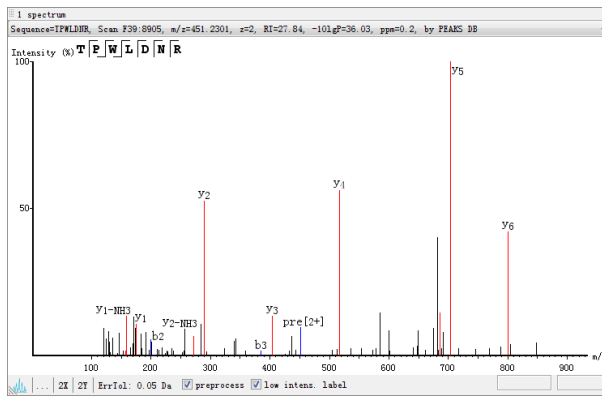

gi | 566160574

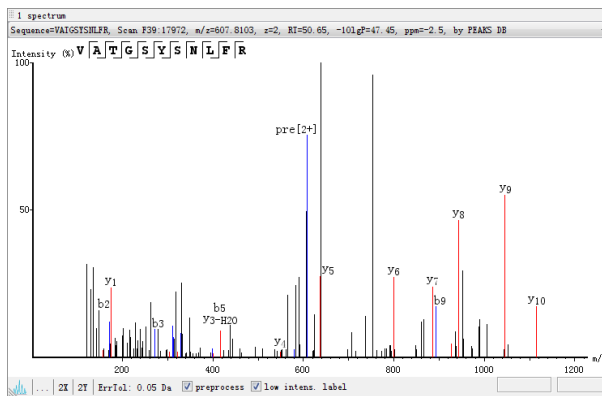



gi | 566161272

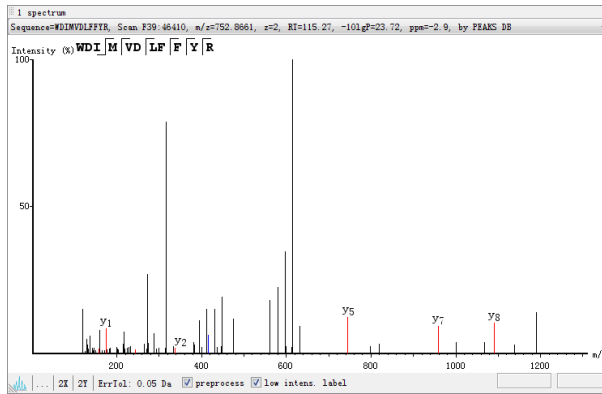

gi | 566162026

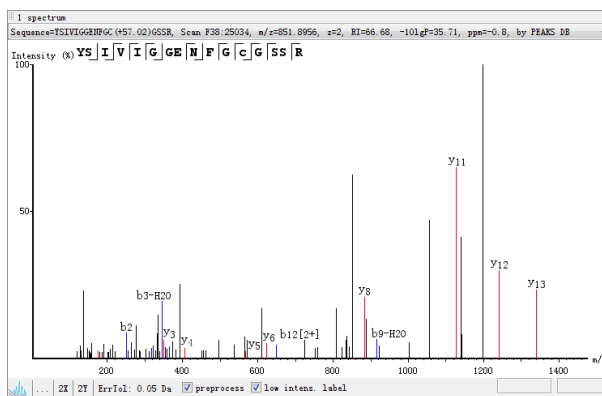

gi | 566166593

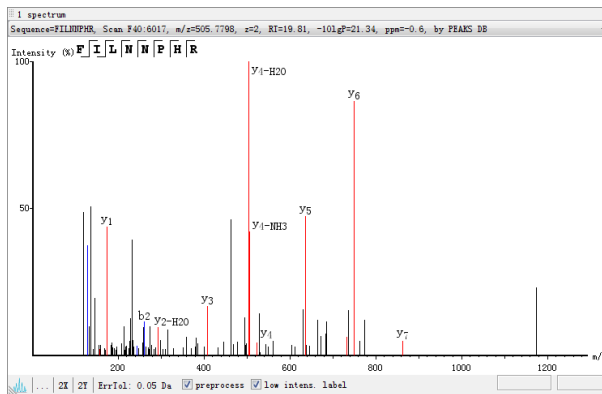

gi | 566168009

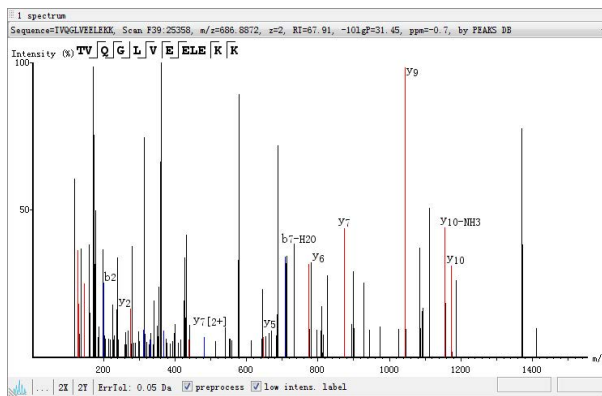

gi | 566172301

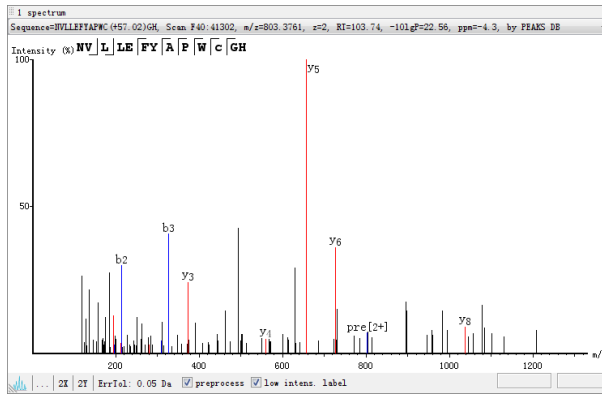

gi | 566174458

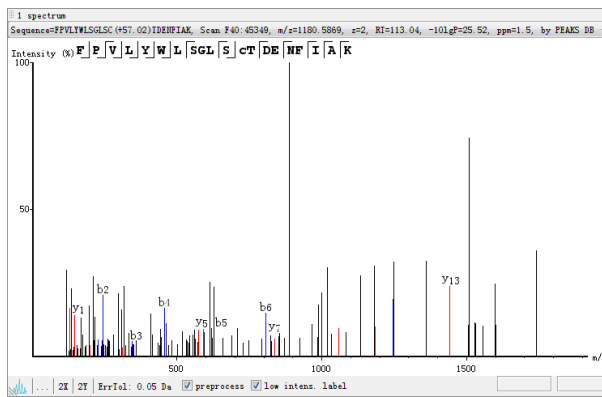

gi | 566176622

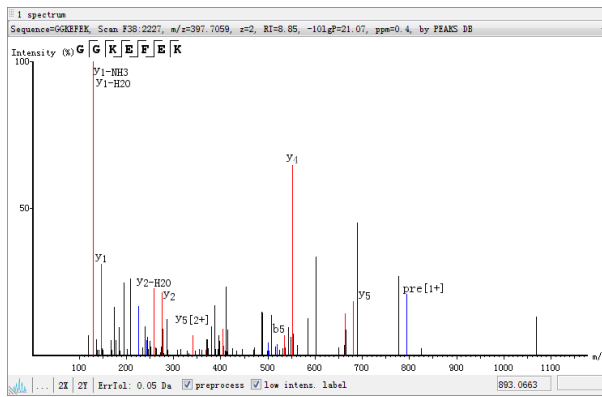

gi | 566177370

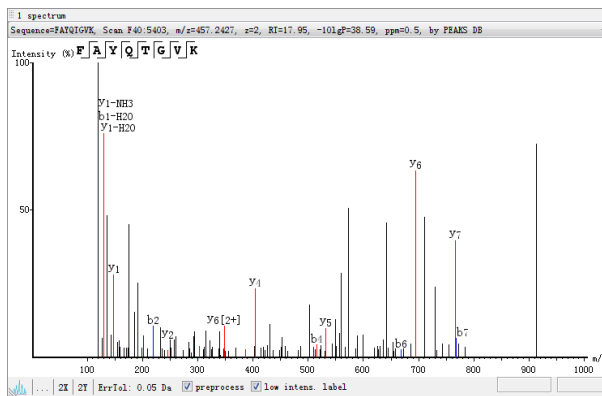

gi | 566186111

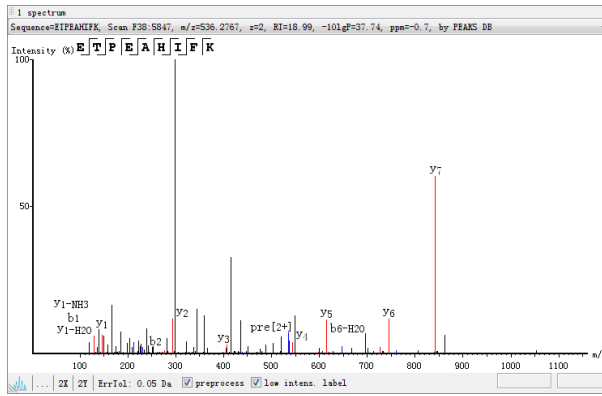

gi | 566186274

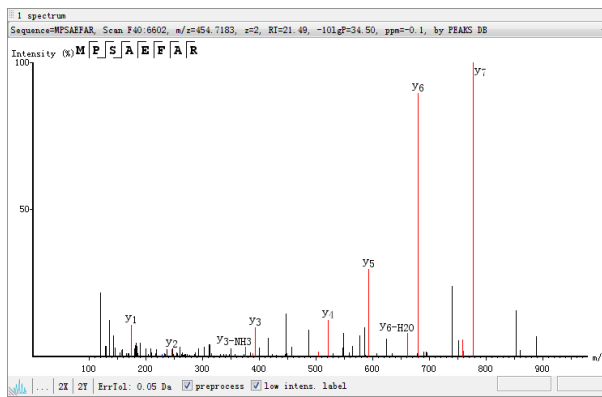

gi | 566187112

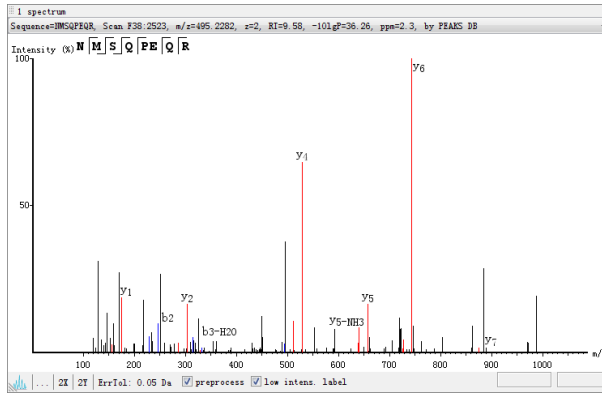

gi | 566187811

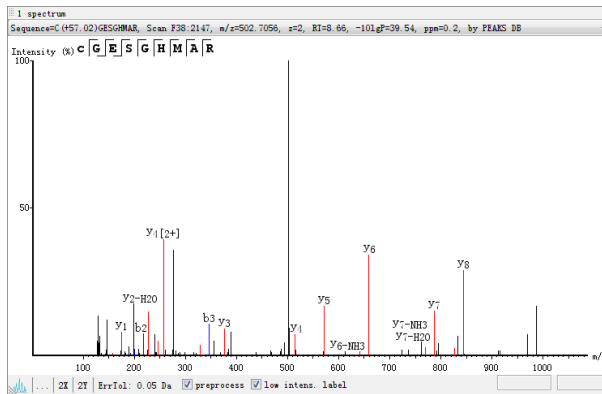

gi | 566187829

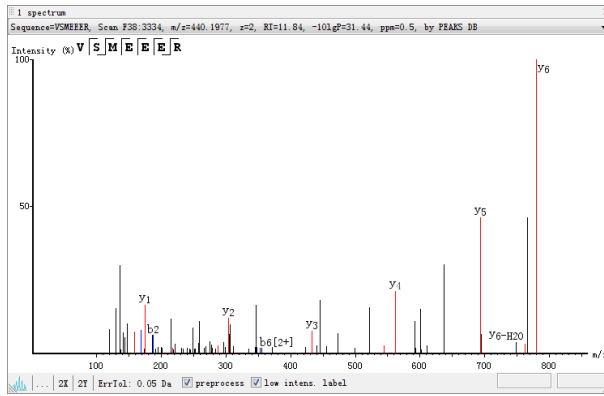

gi | 566192083

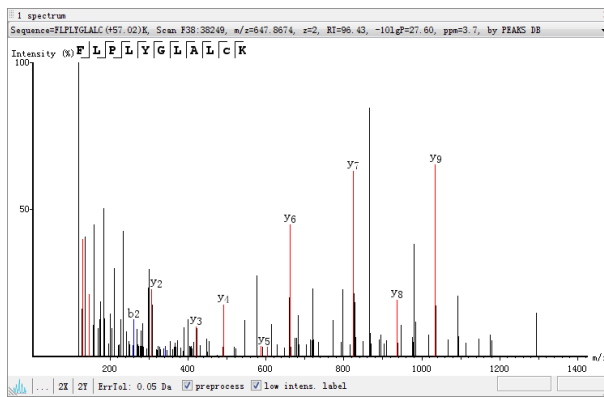

gi | 566192679

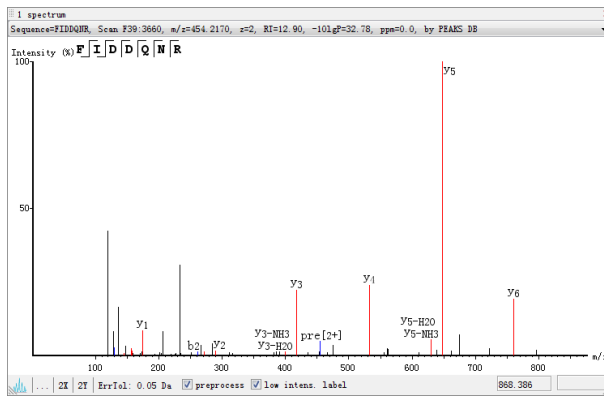

gi | 566197448

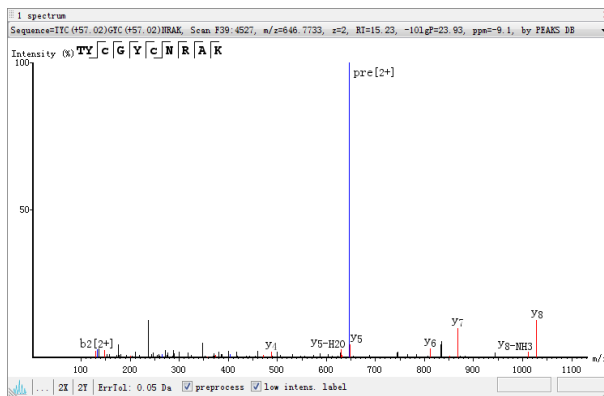

gi | 566202327

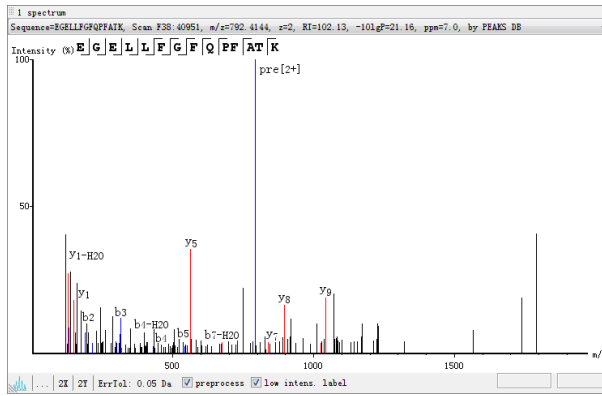

gi | 566206526

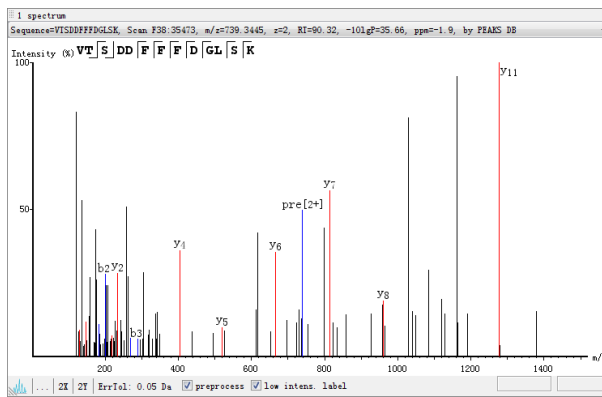

gi | 566211408

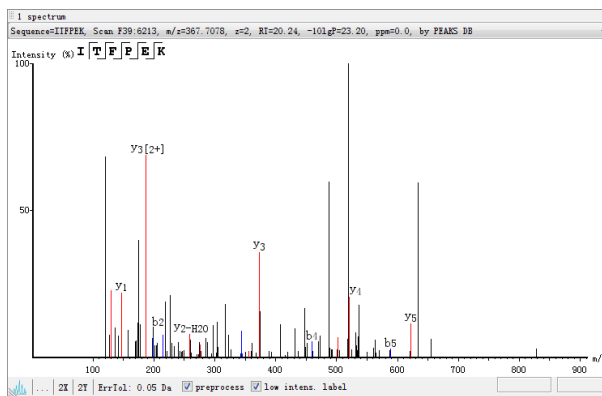

gi | 566215197

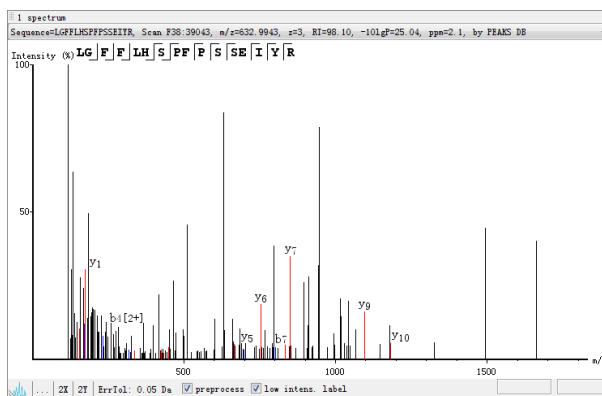

gi | 566215982

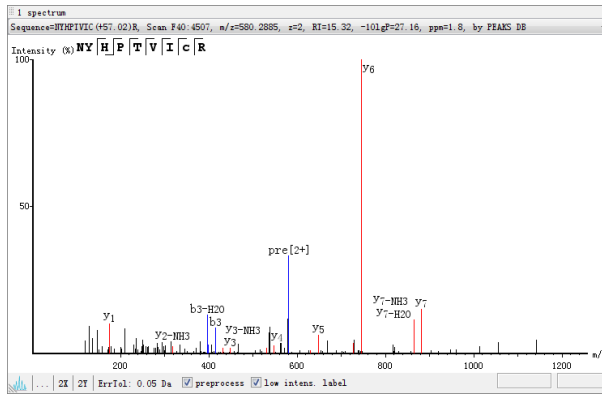

gi | 566234529

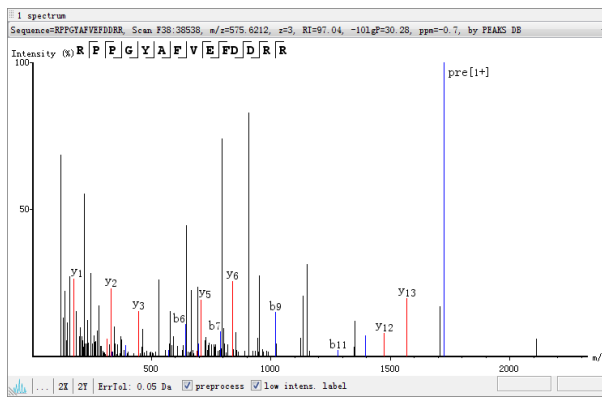

gi | 566257303

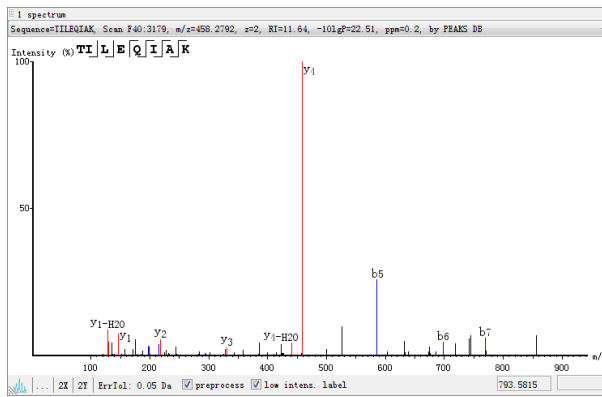

gi | 566258212

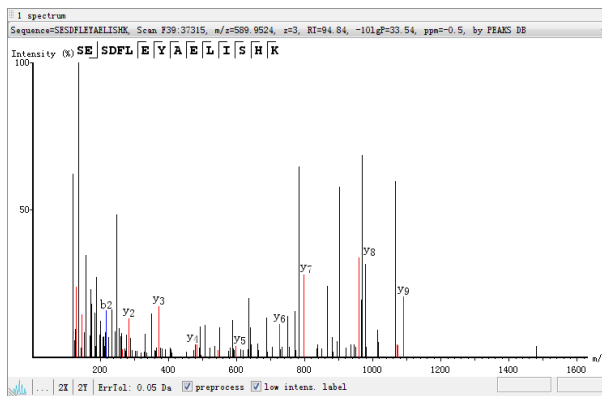

gi | 731380876

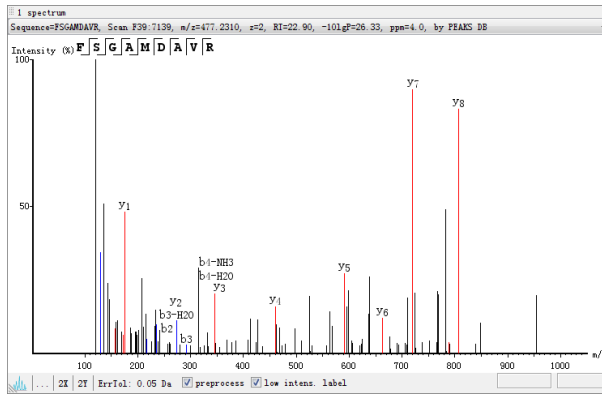

gi | 731382912

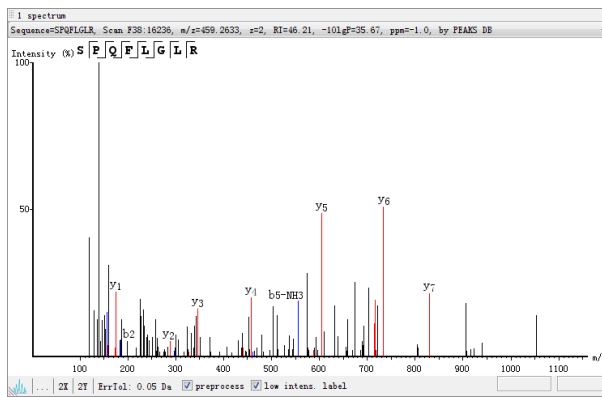

gi | 731387671

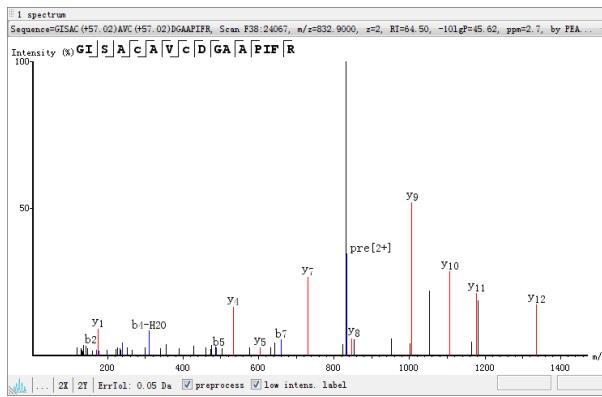

gi | 731391105

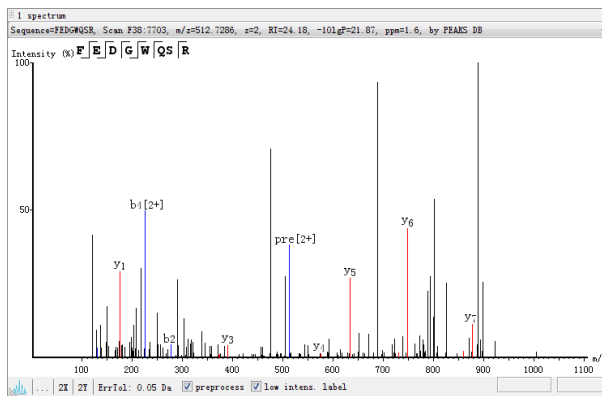

gi | 731393107

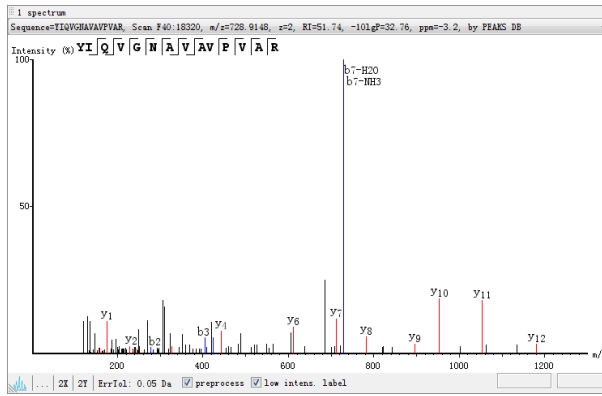

gi | 731393292

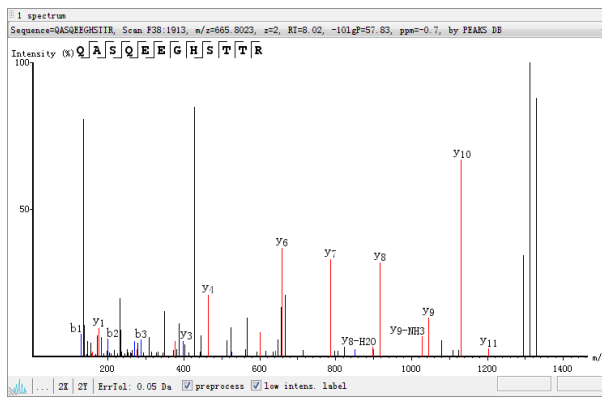

gi | 731395934

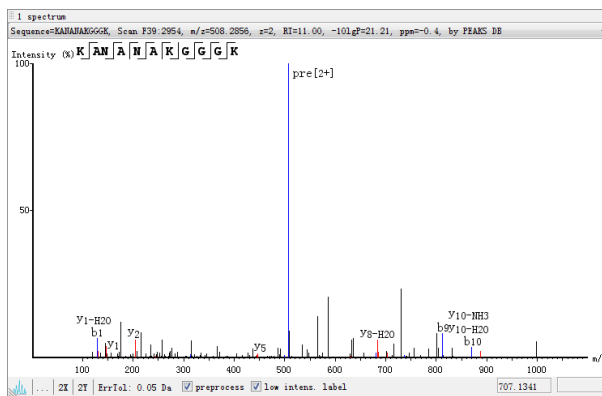

gi | 731412938

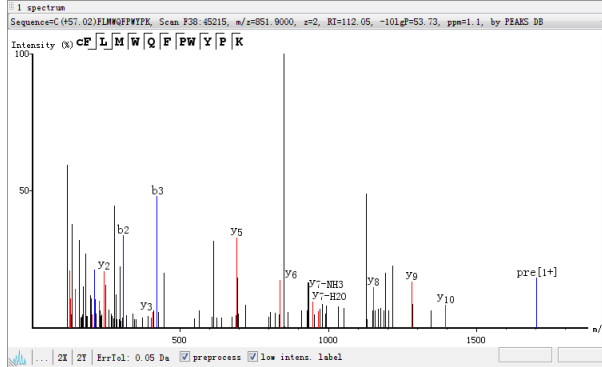



gi | 731418622

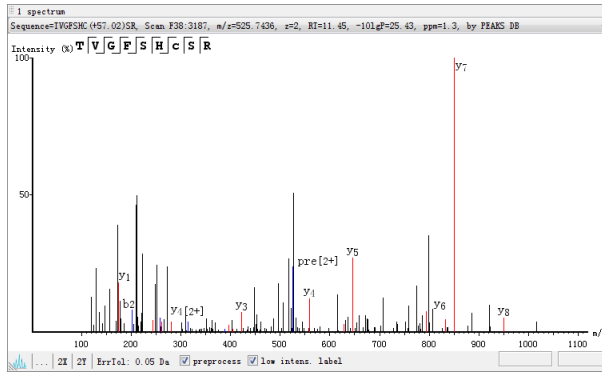

gi | 731421066

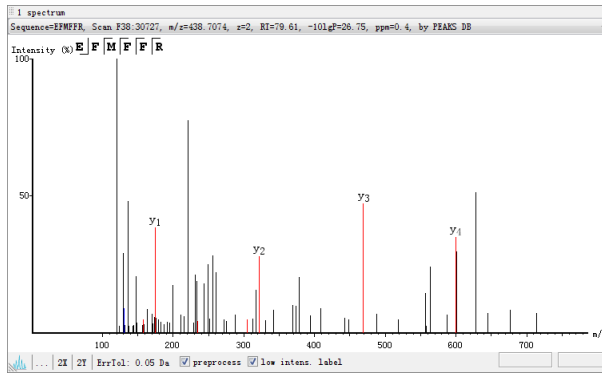

gi | 731422501

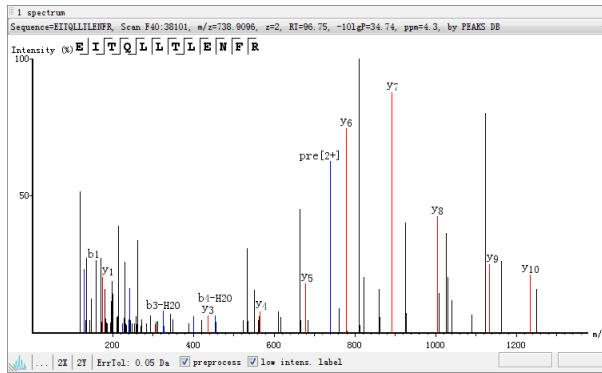

gi | 731435142

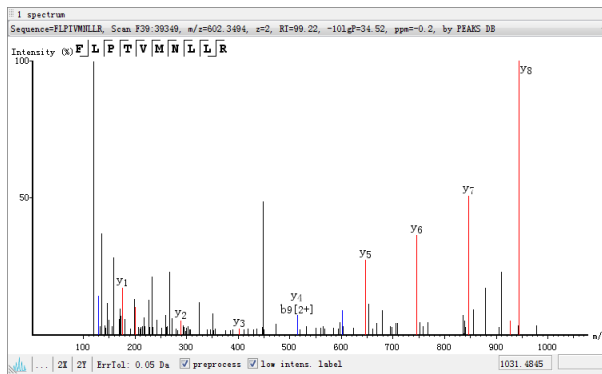

gi | 733214771

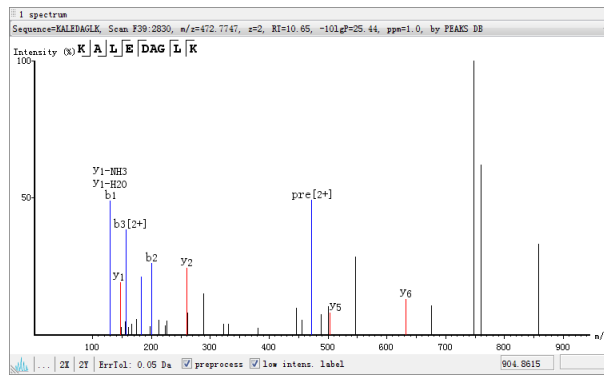

Fig.S2 The spectra of the proteins identified by one unique peptide with only one spectrum in CK1. Upper is the accession of protein, and under is its corresponding spectrum.

gi | 224060455

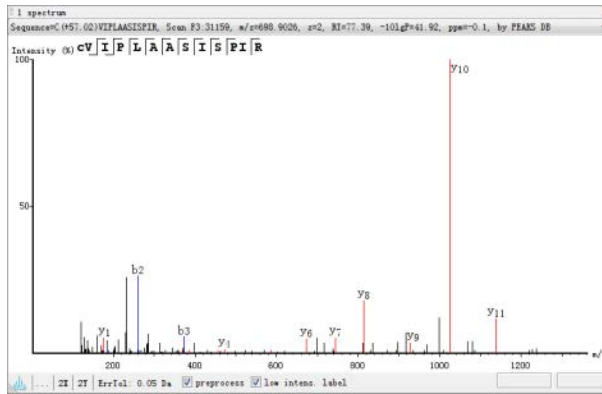

gi | 224066959

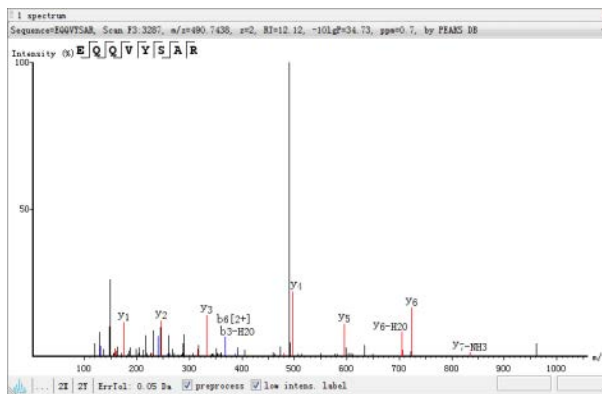

gi | 224067318

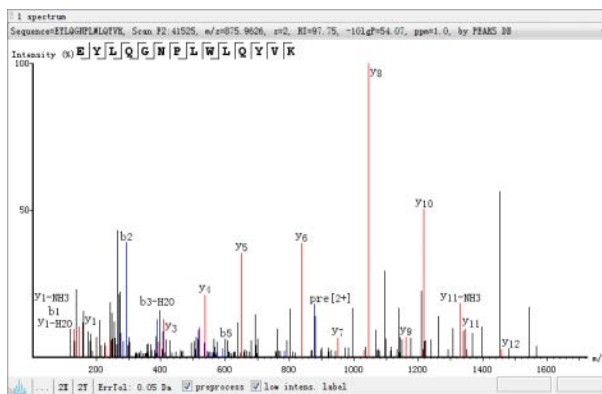

gi | 224067846

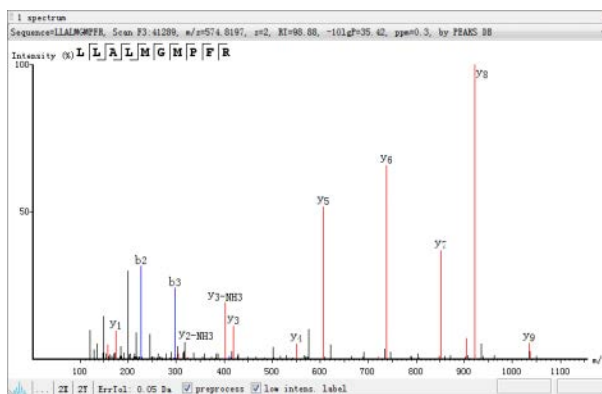

gi | 224073306

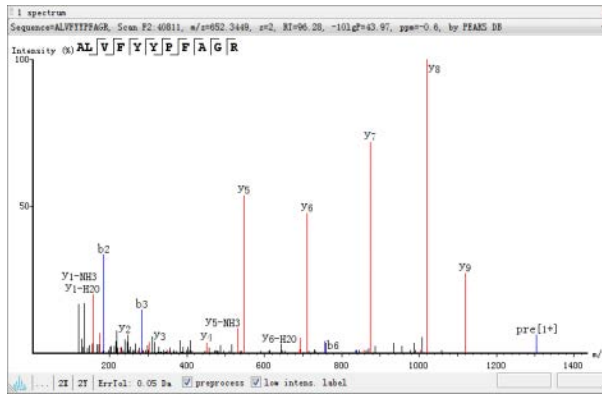

gi | 224073851

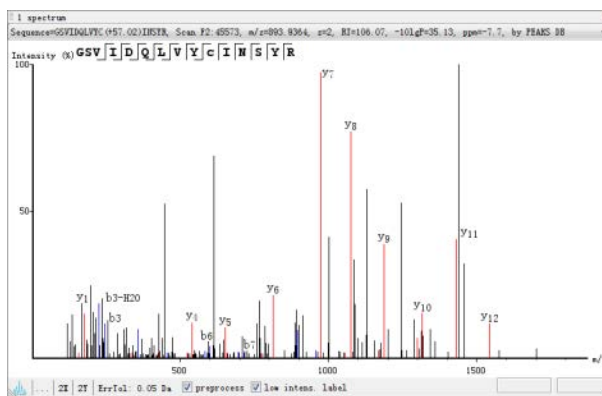

gi | 224079530

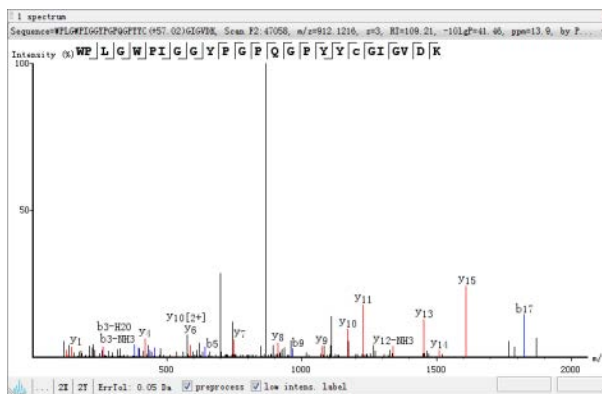

gi | 224080325

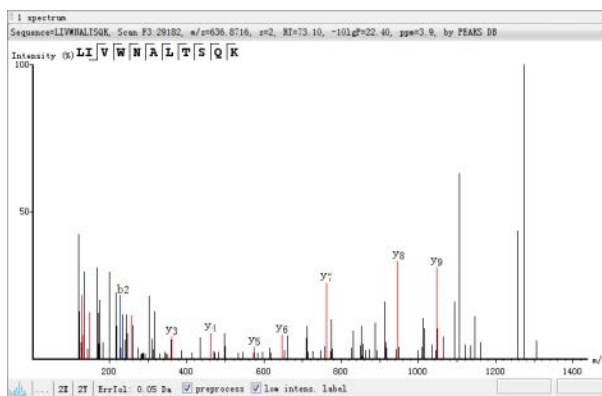

gi | 224083163

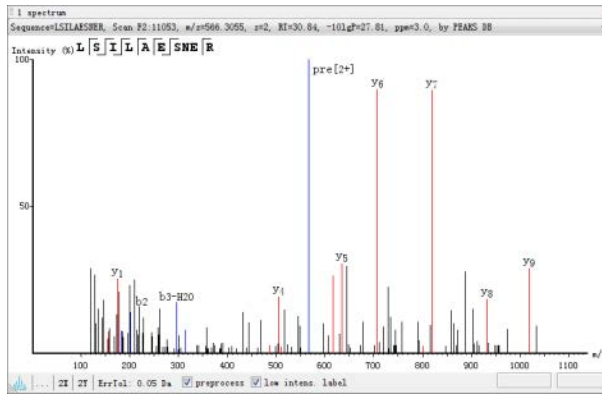

gi | 224084864

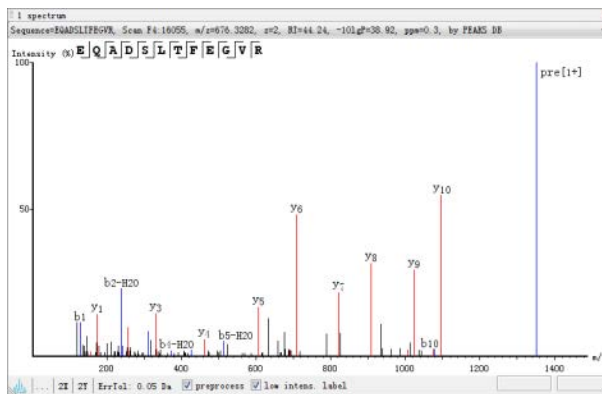

gi | 224085103

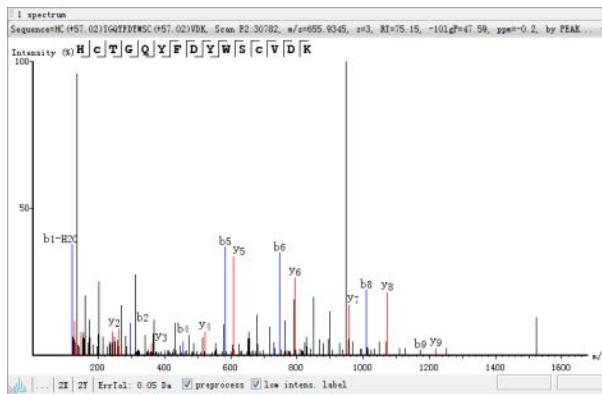

gi | 224086130

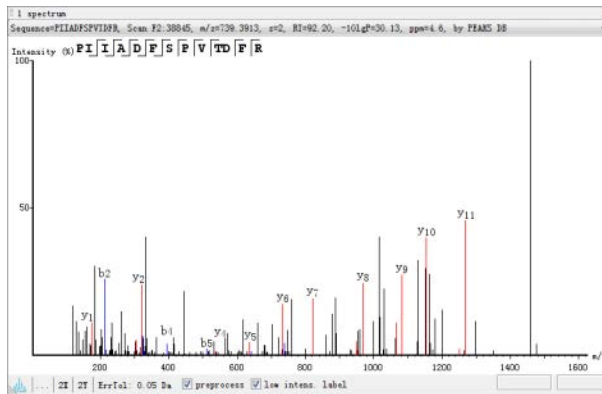

gi | 224089058

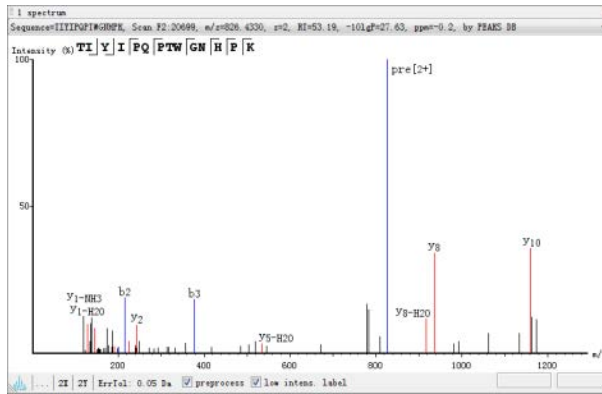

gi | 224089182

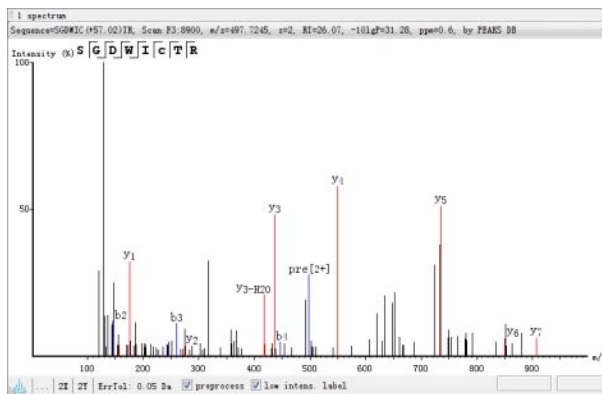

gi | 224092266

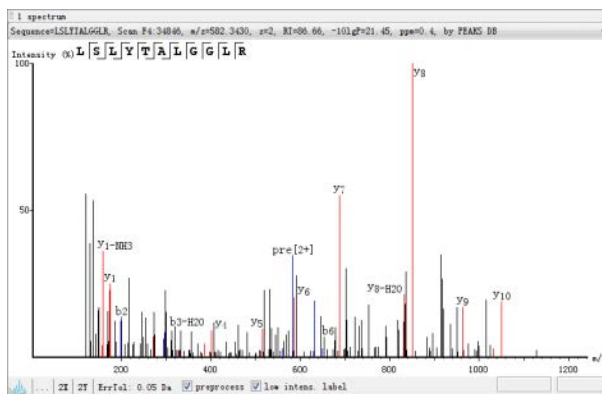

gi | 224093896

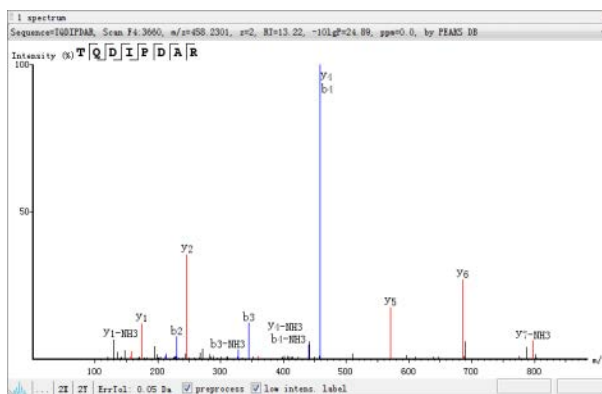

gi | 224094759

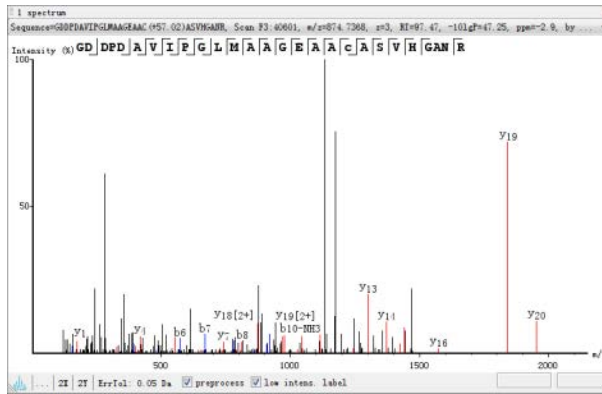

gi | 224094809

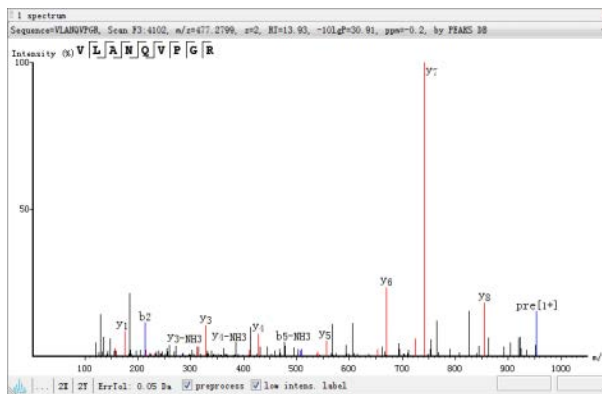

gi | 224096333

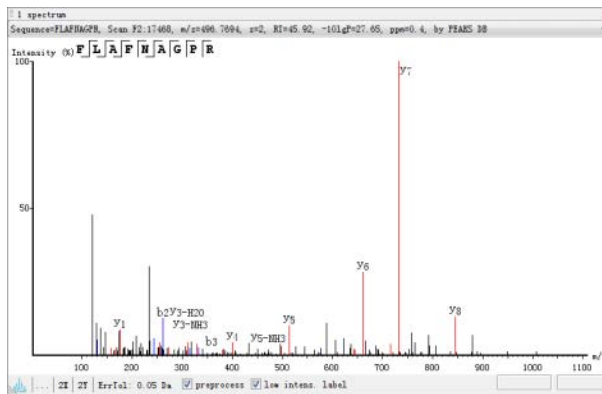

gi | 224100839

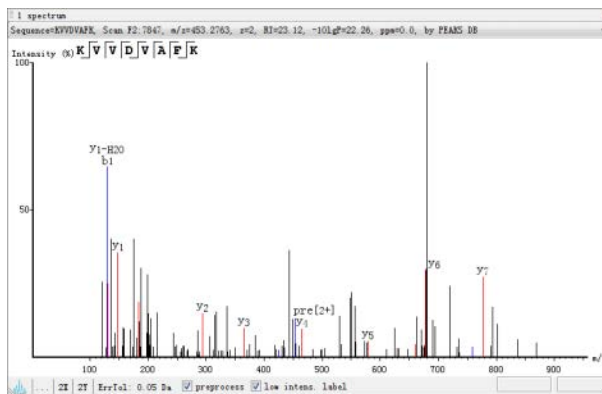

gi | 224100909

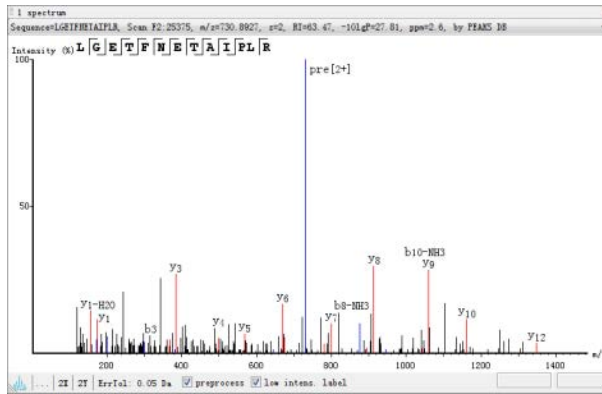

gi | 224102881

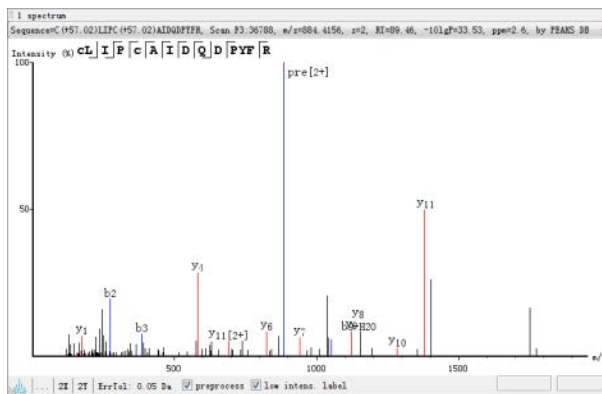

gi | 224103873

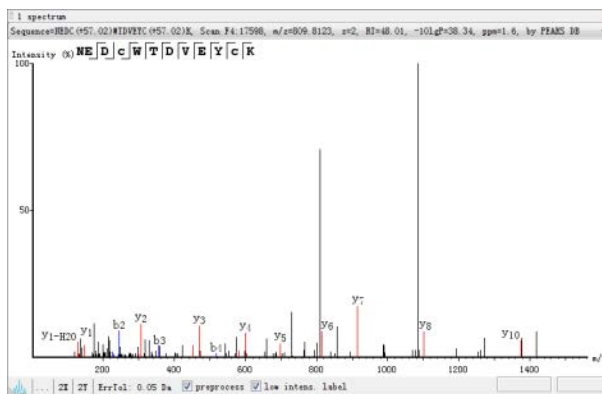

gi | 224104643

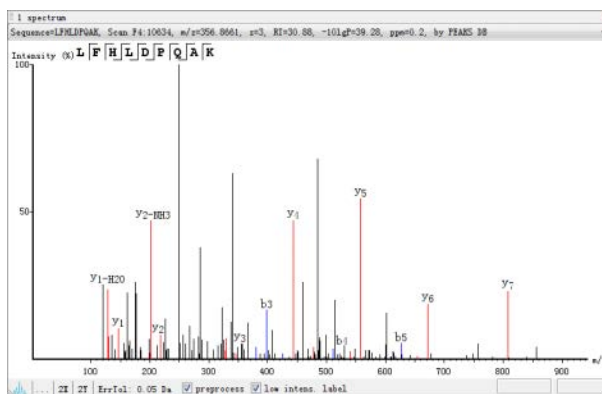



gi | 224105405

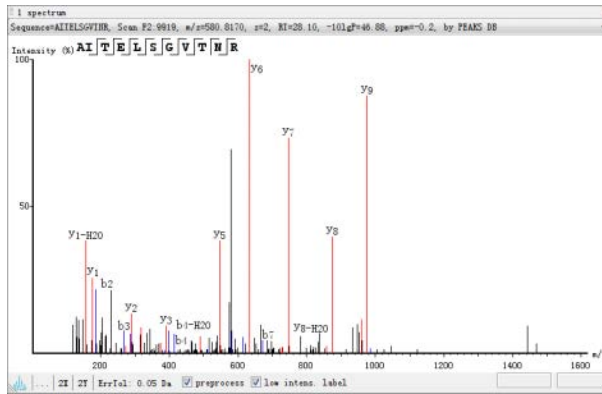

gi | 224105455

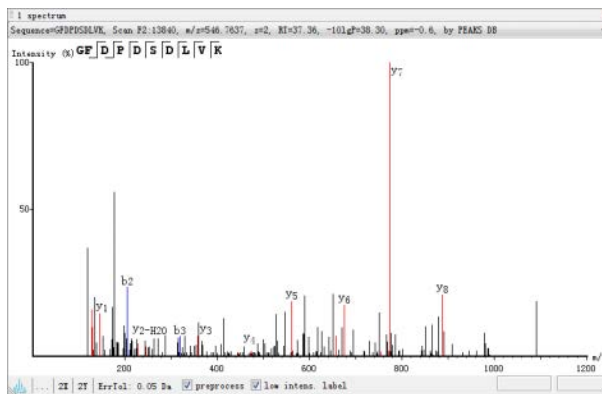

gi | 224106319

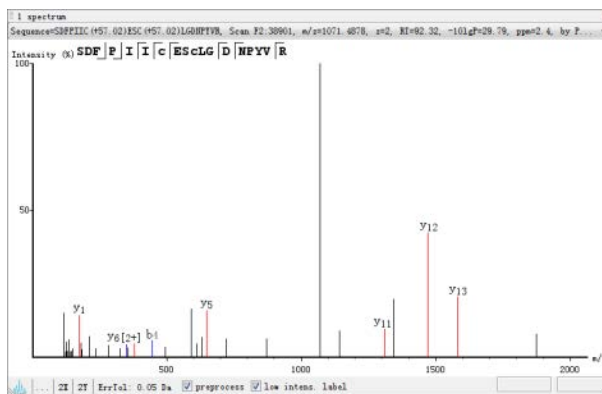

gi | 224107749

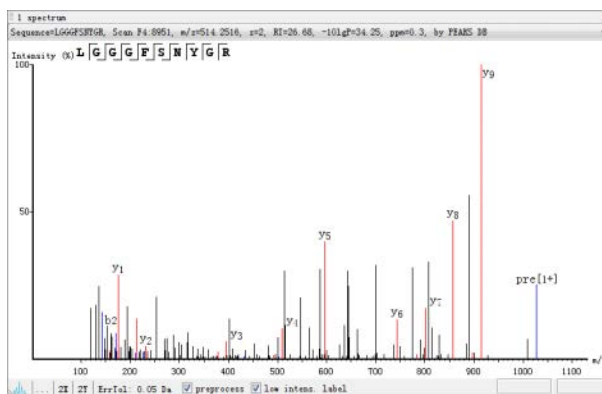

gi | 224112341

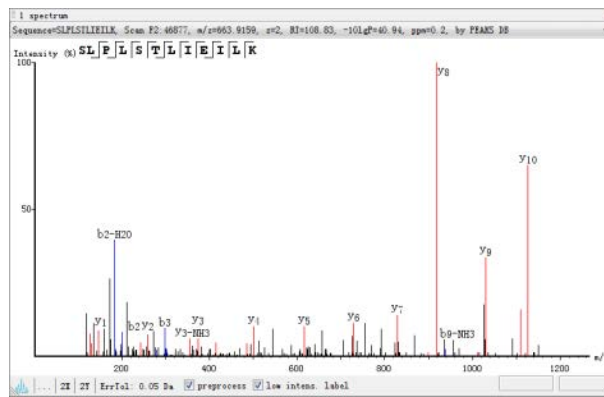

gi | 224114830

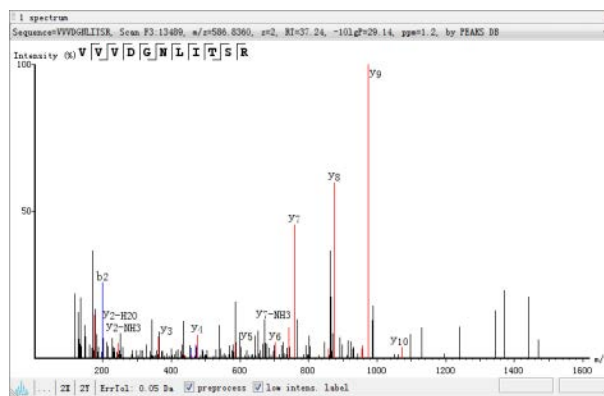

gi | 224115158

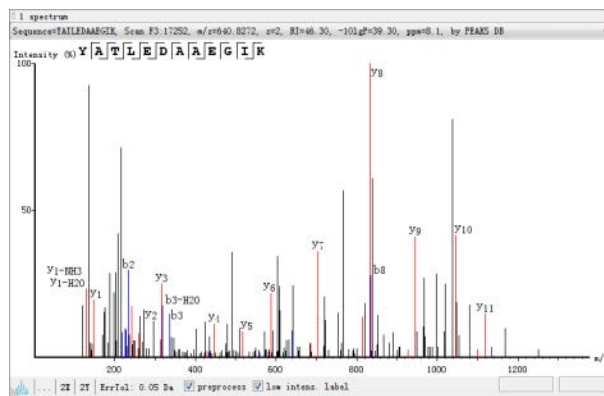

gi | 224116788

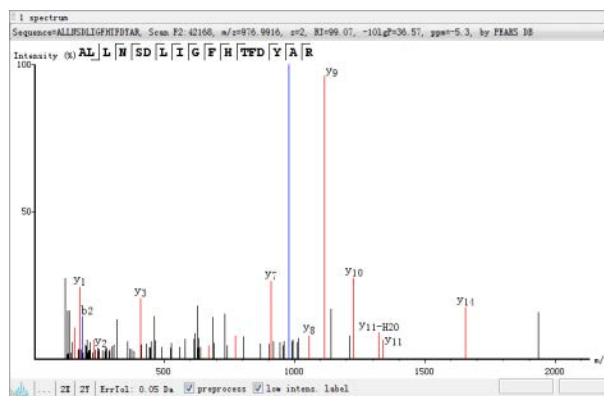

gi | 224121470

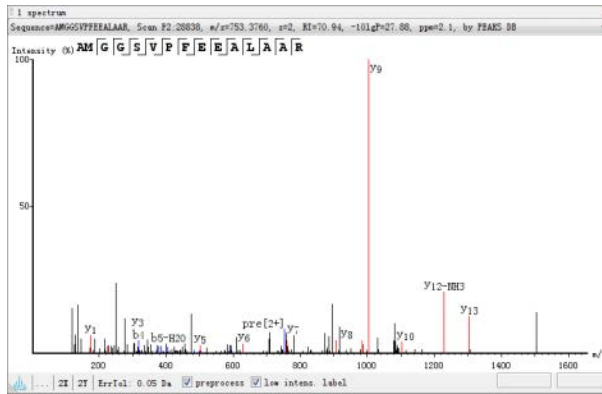

gi | 224124820

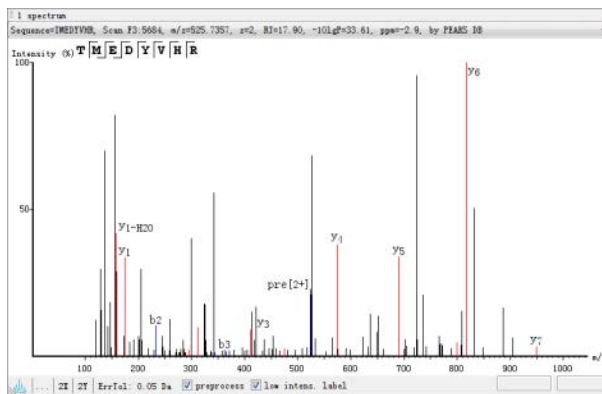

gi | 224126151

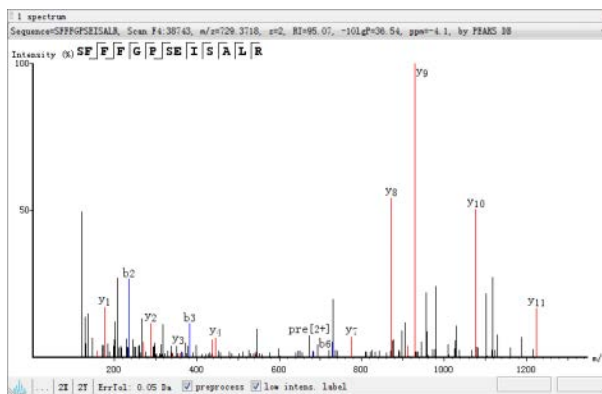

gi | 224126789

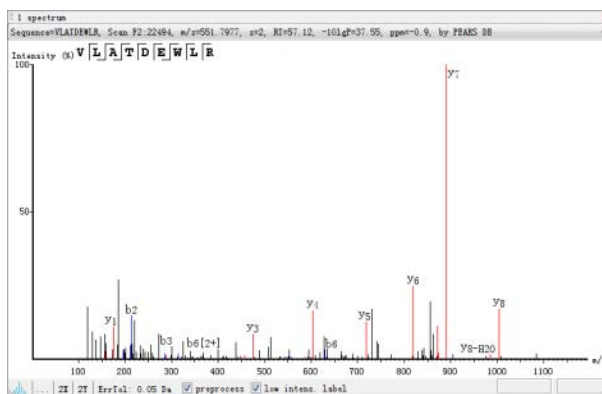

gi | 224129596

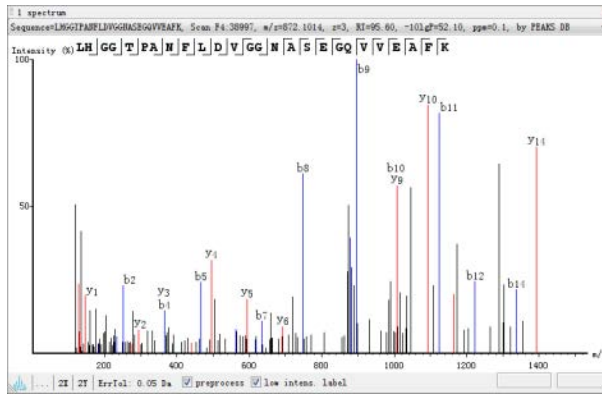

gi | 224130362

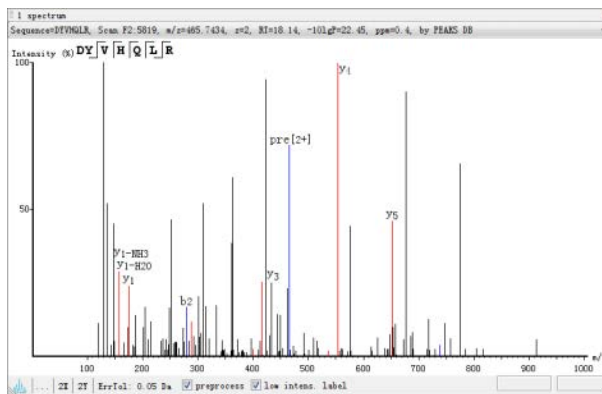

gi | 224130486

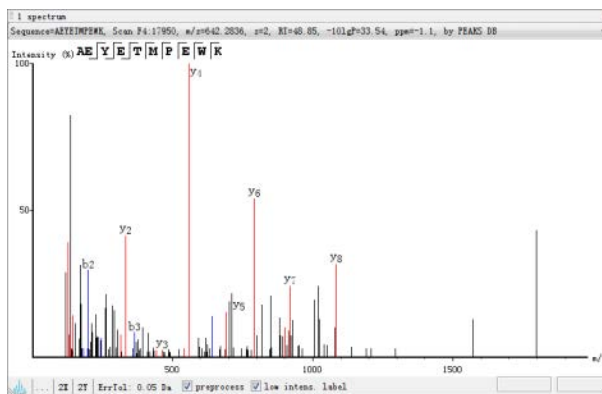

gi | 224138022

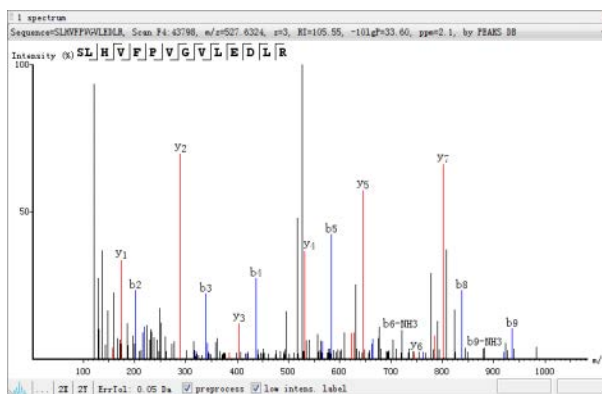

gi | 224138170

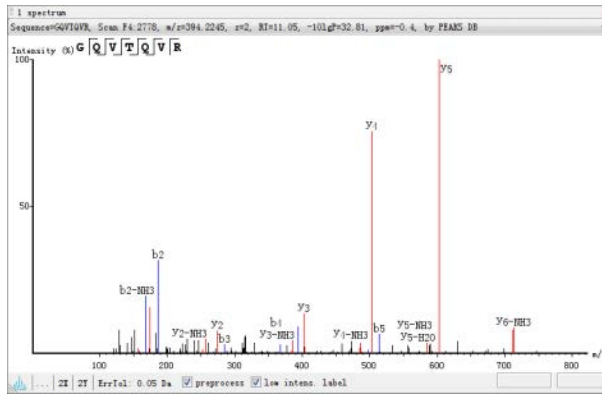

gi | 224141359

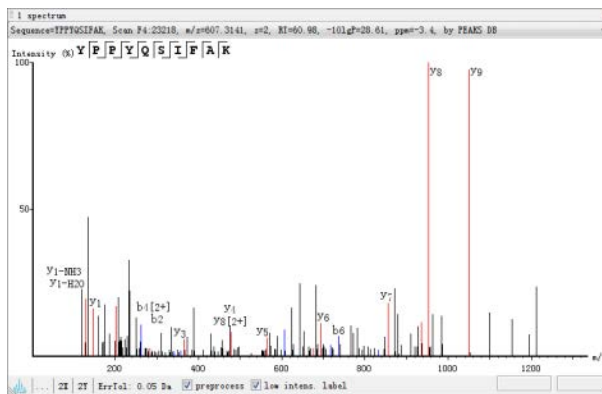

gi | 224143559

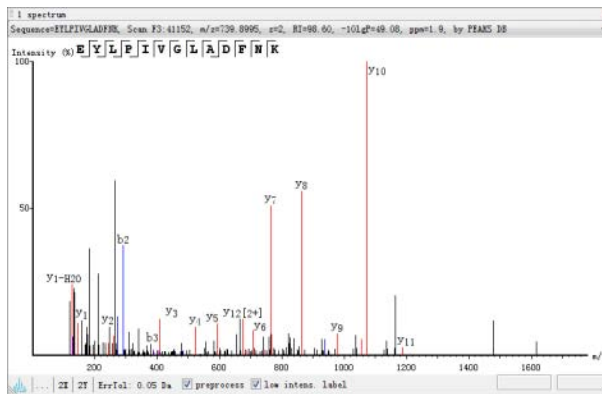

gi | 224143772

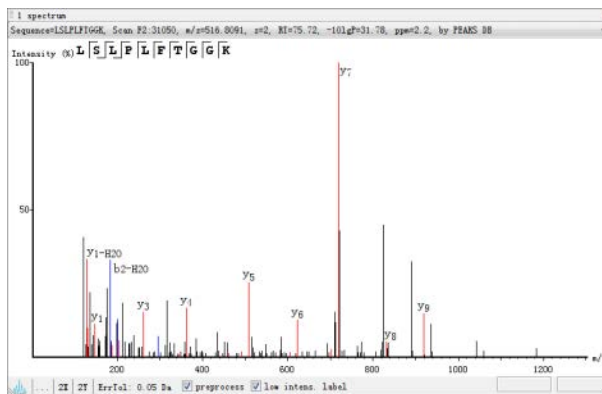

gi | 224146178

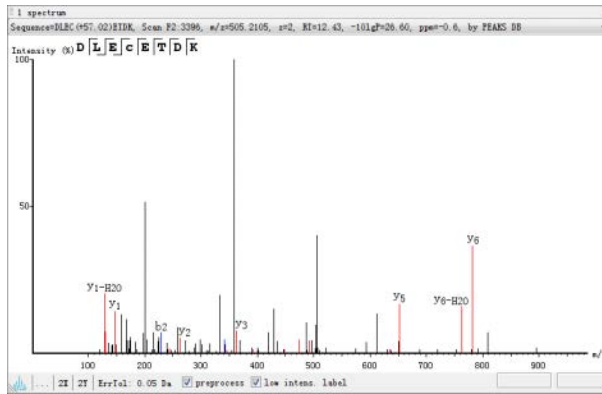

gi | 224146696

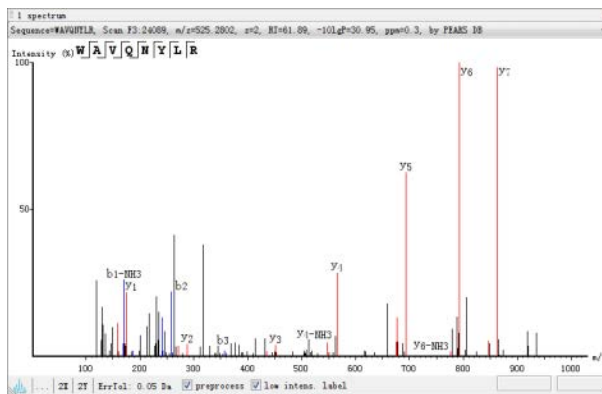

gi | 225423491

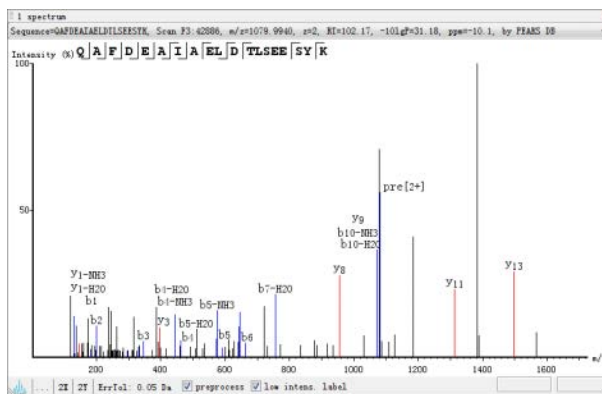

gi | 225424272

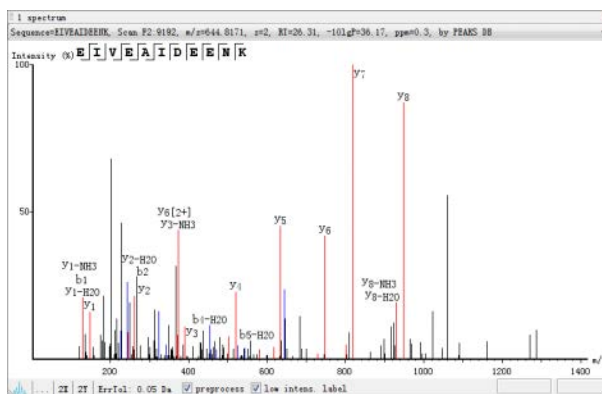

gi | 225424713

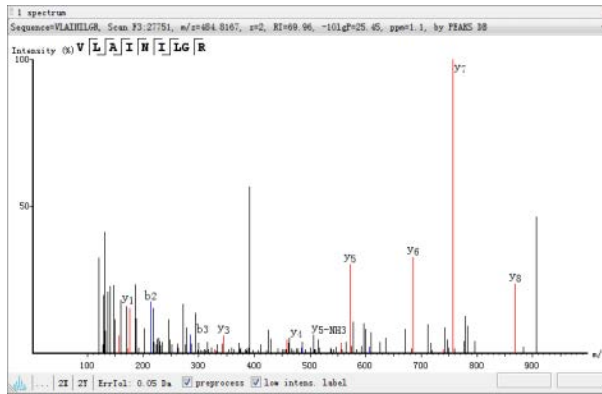

gi | 225425274

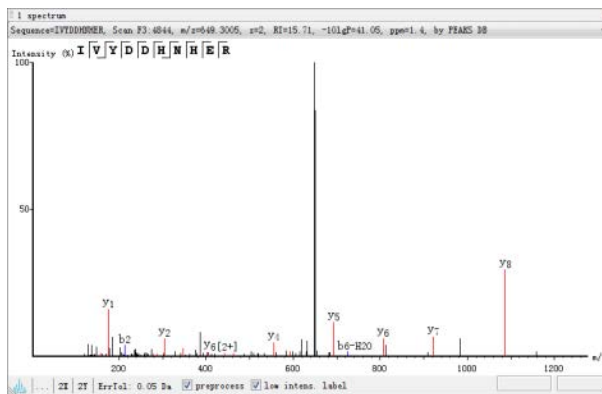

gi | 225425595

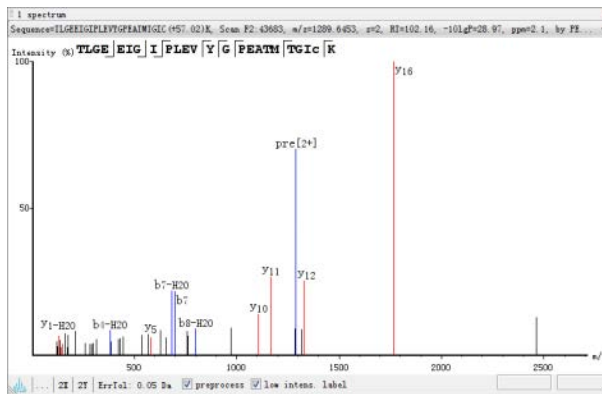

gi | 225425706

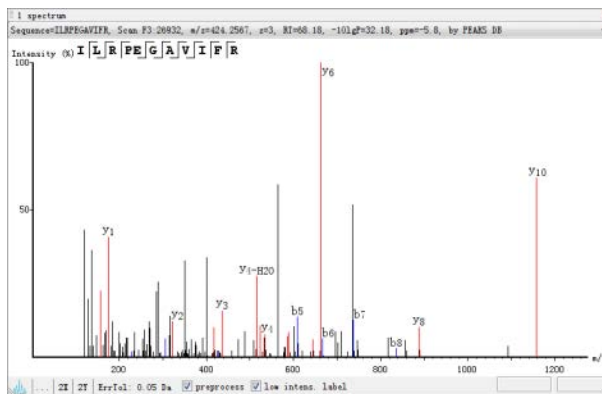

gi | 225426312

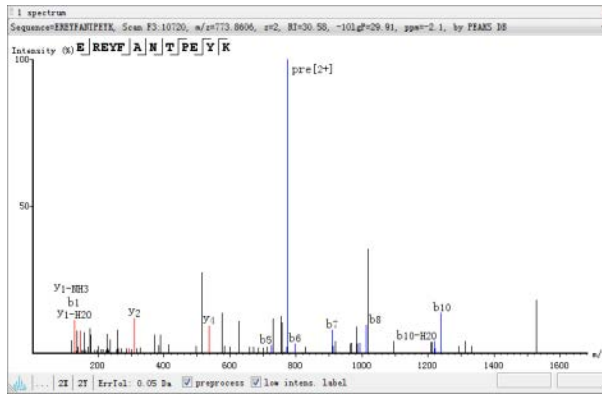

gi | 225427419

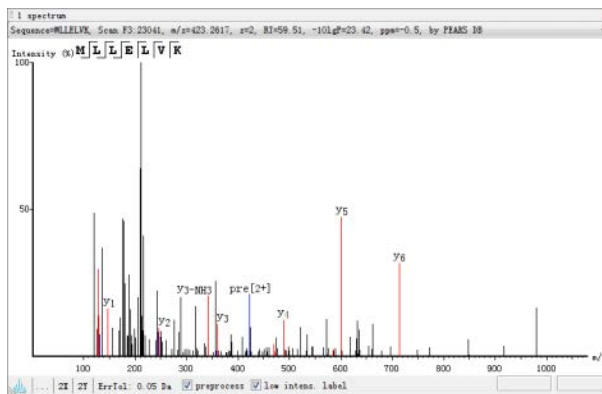

gi | 225428009

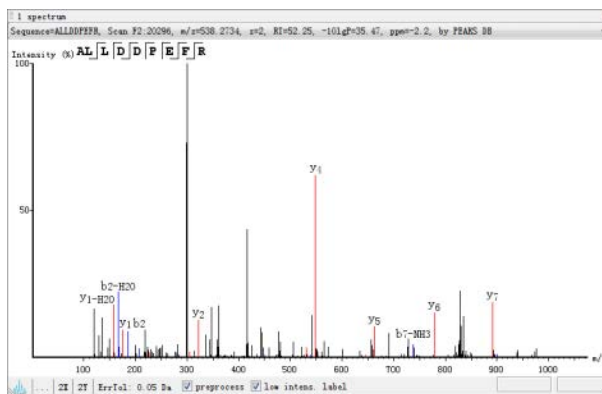

gi | 225428865

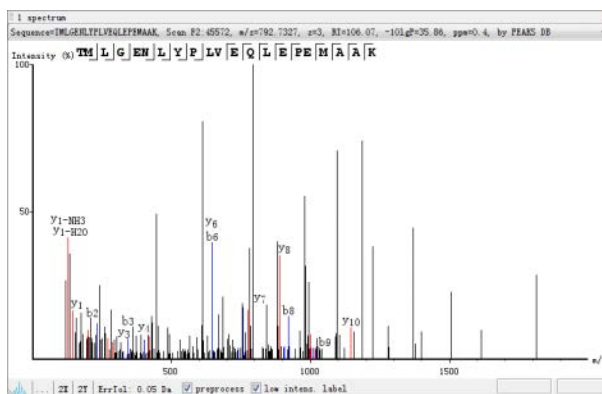



gi | 225428898

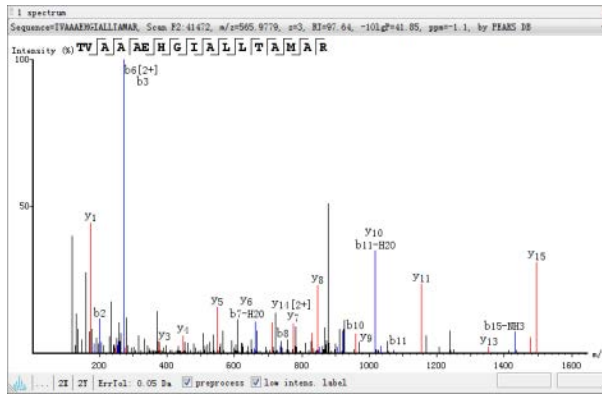

gi | 225429450

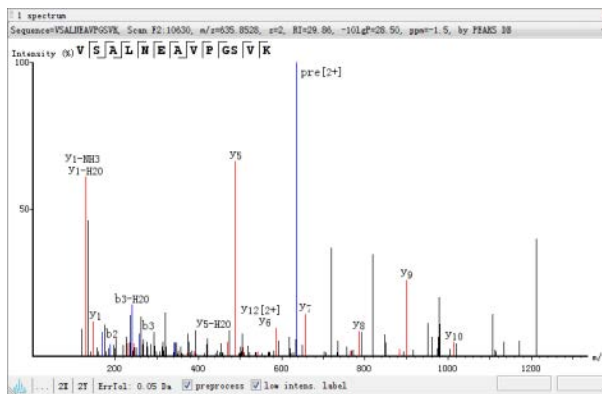

gi | 225429995

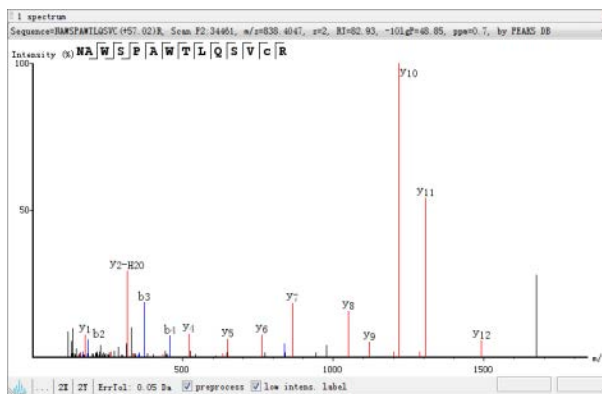

gi | 225430488

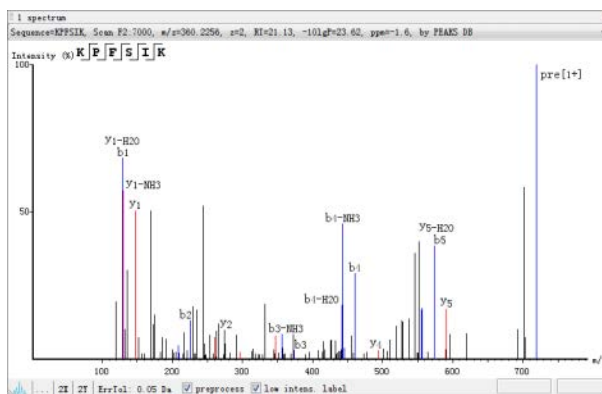

gi | 225431755

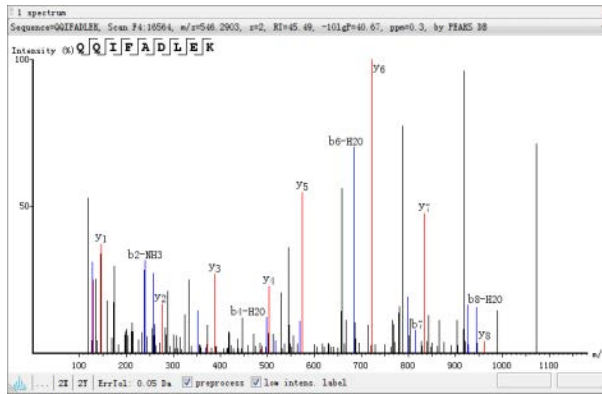

gi | 225431922

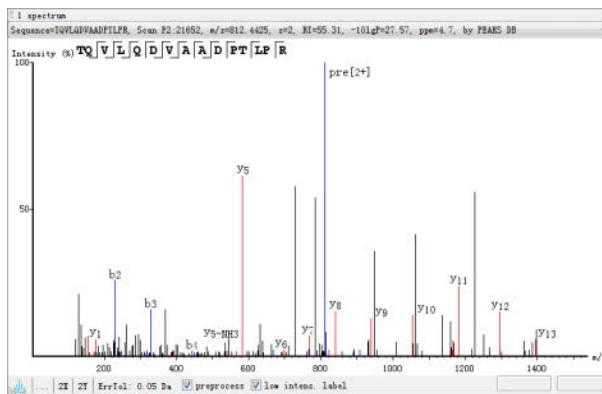

gi | 225432664

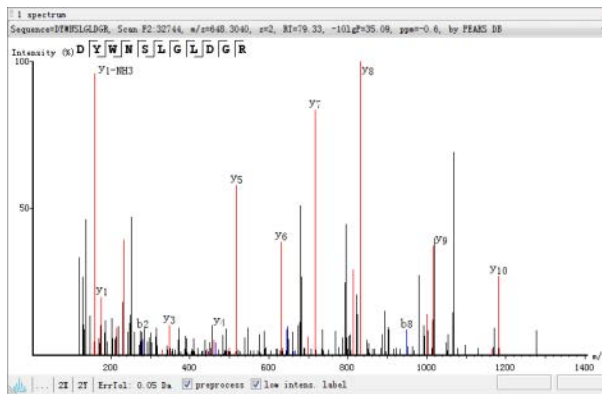

gi | 225434191

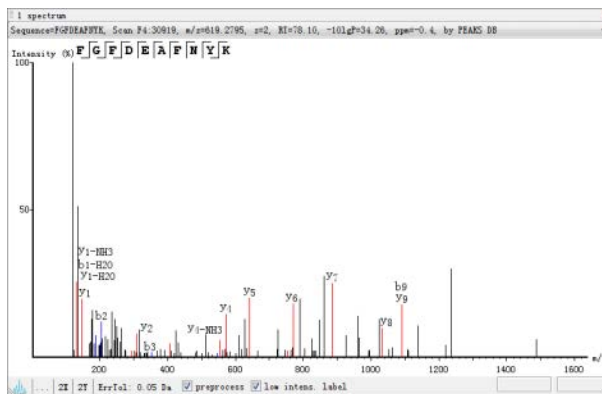

gi | 225434259

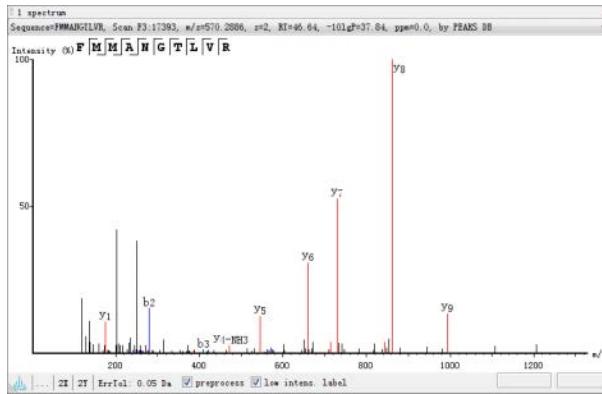

gi | 225434692

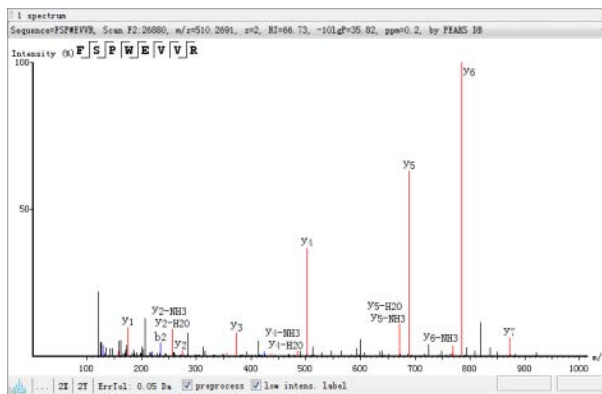

gi | 225434984

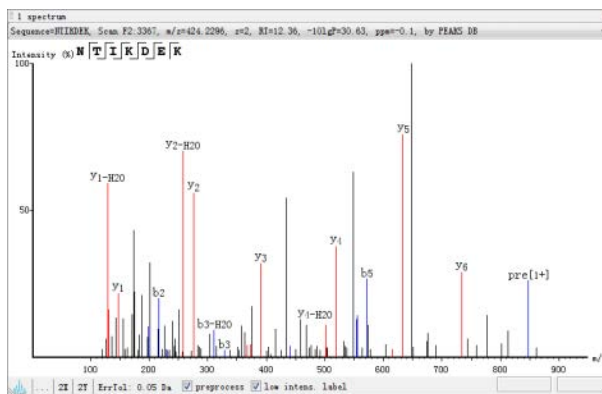

gi | 225435122

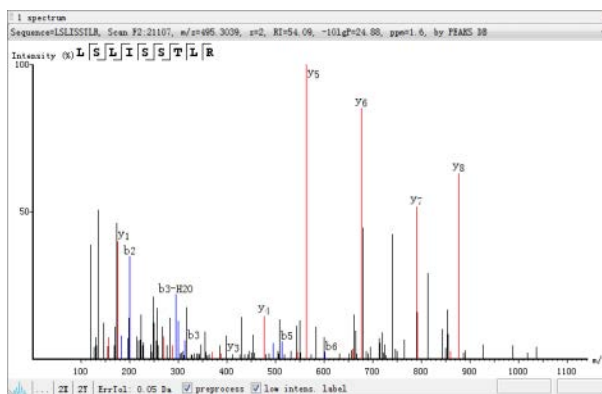

gi | 225435189

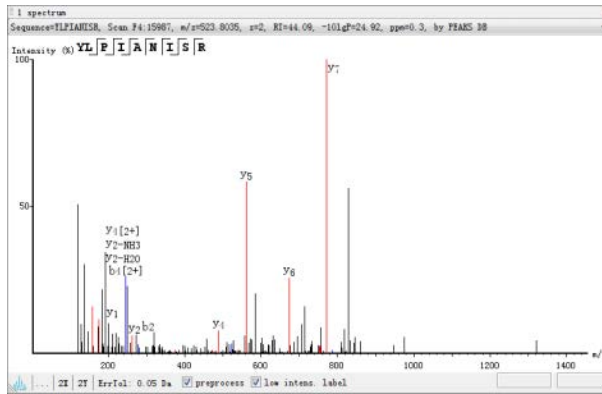

gi | 225435925

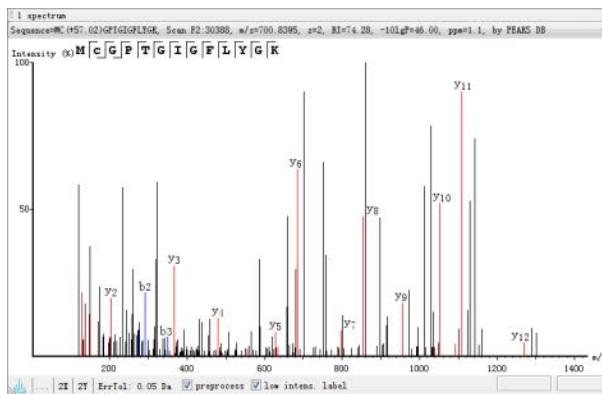

gi | 225437493

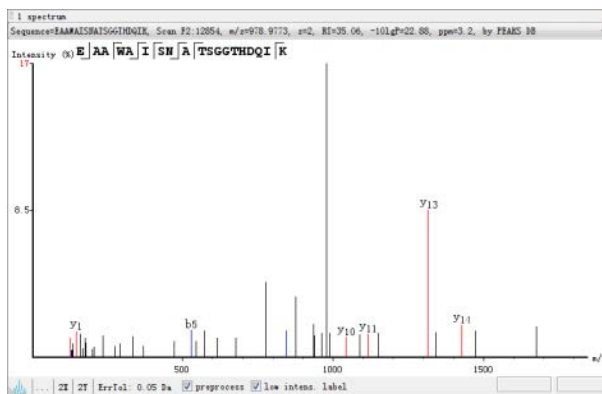

gi | 225437598

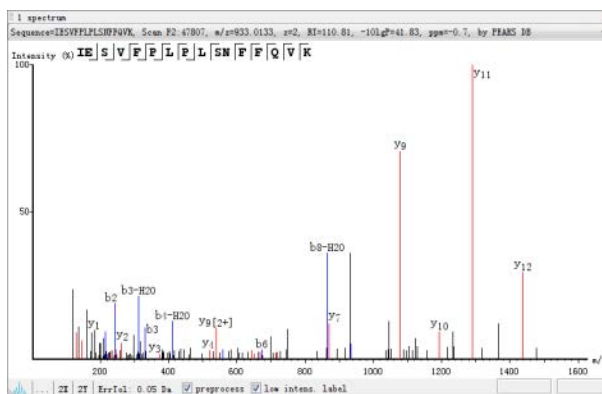

gi | 225437618

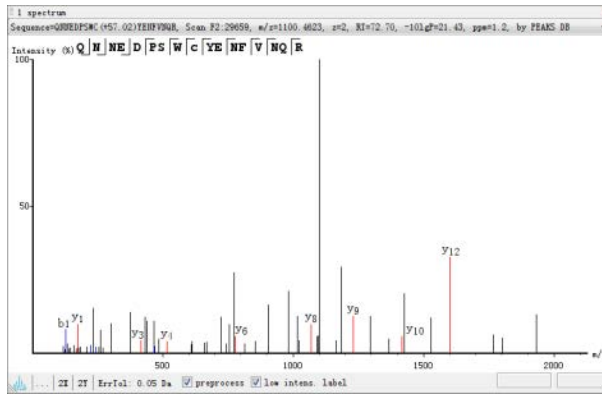

gi | 225438035

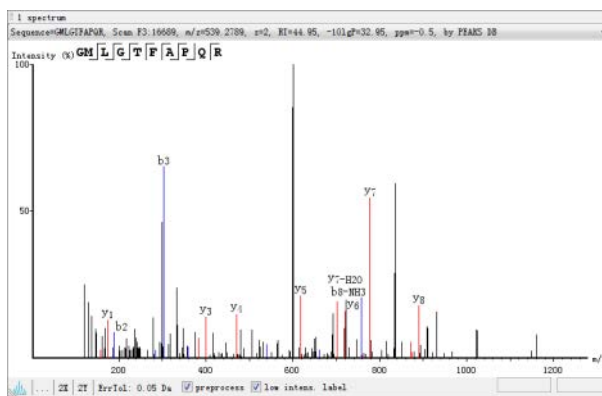

gi | 225438067

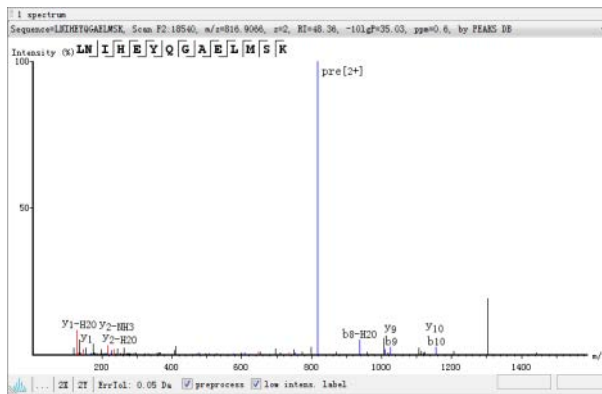

gi | 225439775

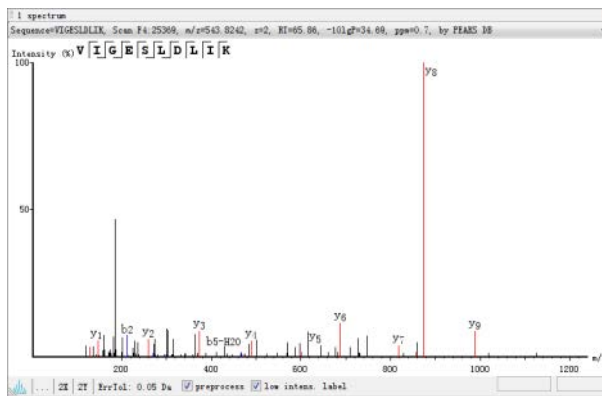

gi | 225442357

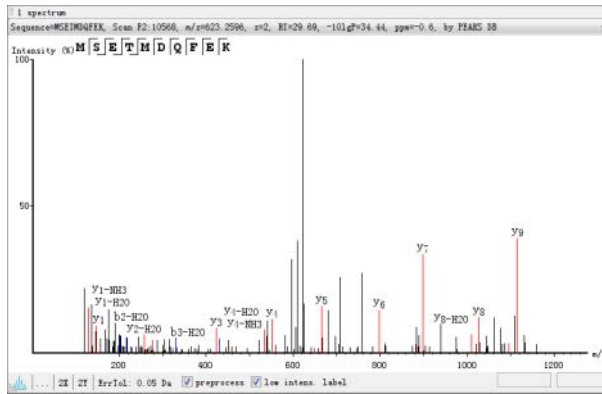

gi | 225442791

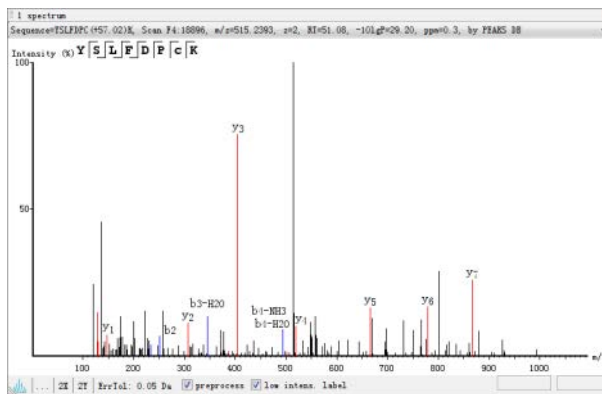

gi | 225443109

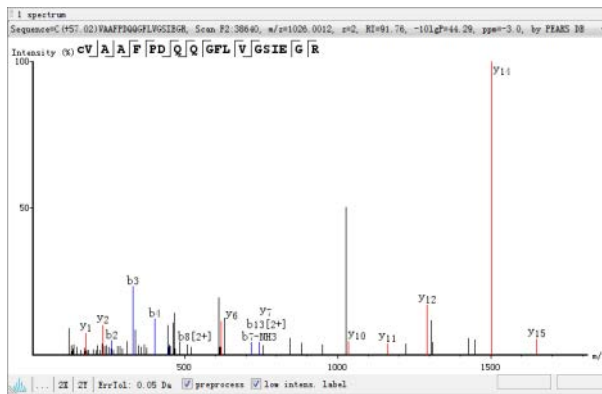

gi | 225443231

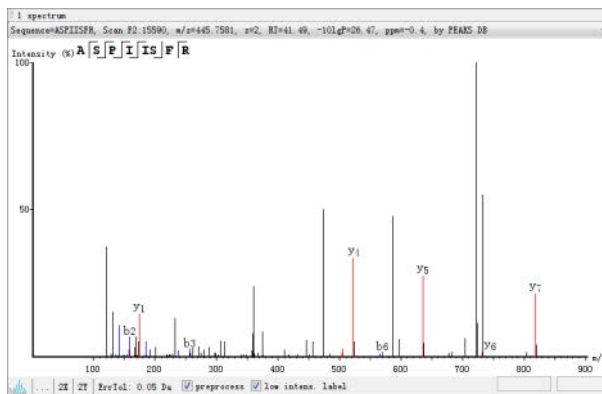

gi | 225443738

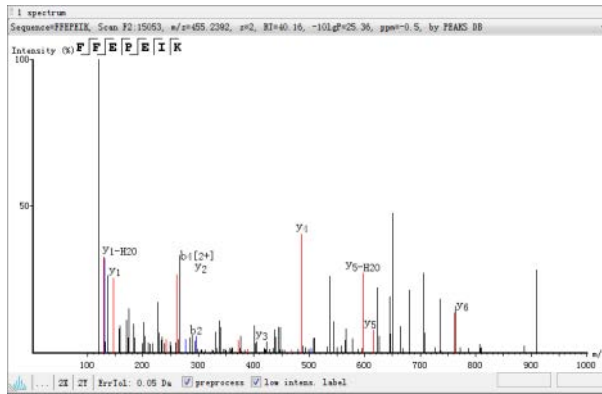

gi | 225444159

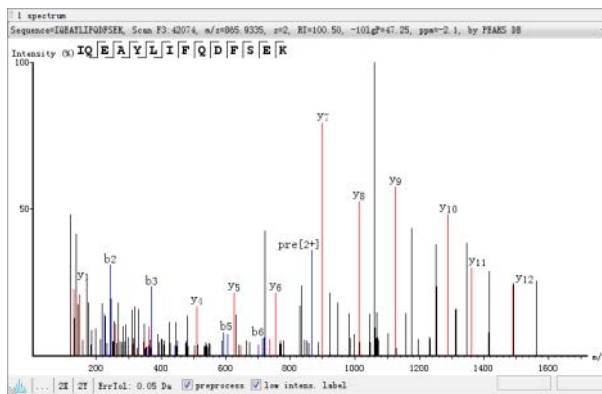

gi | 225444525

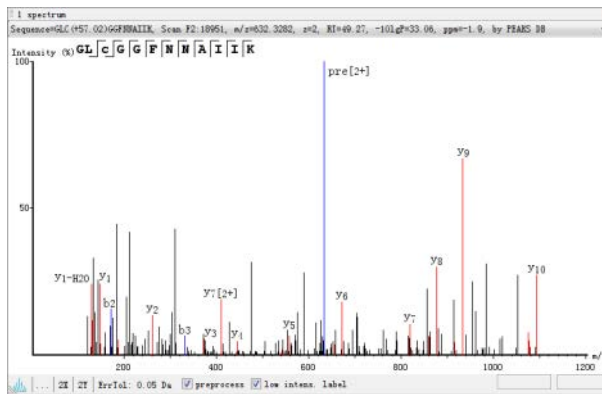

gi | 225444537

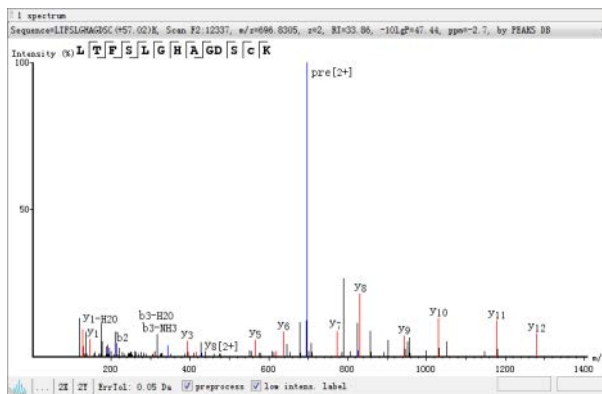

gi | 225445080

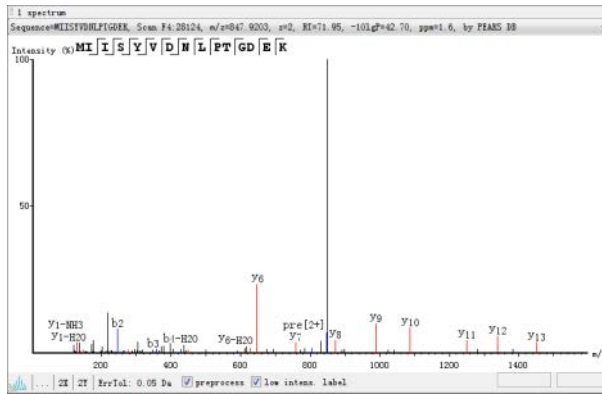

gi | 225445170

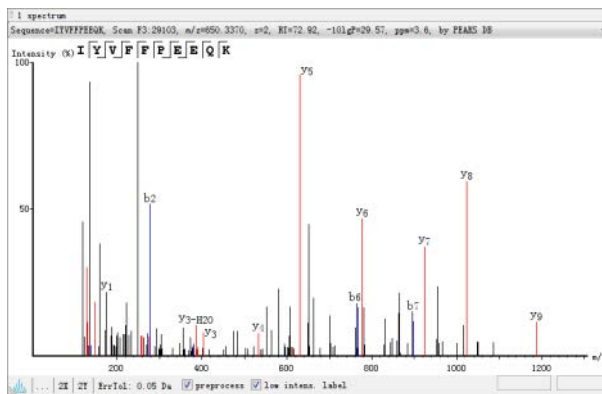

gi | 225445664

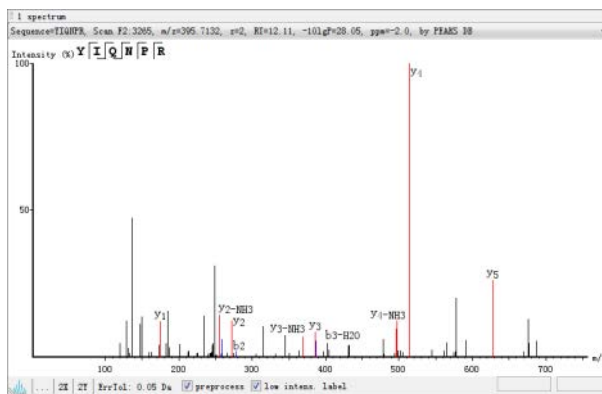

gi | 225445842

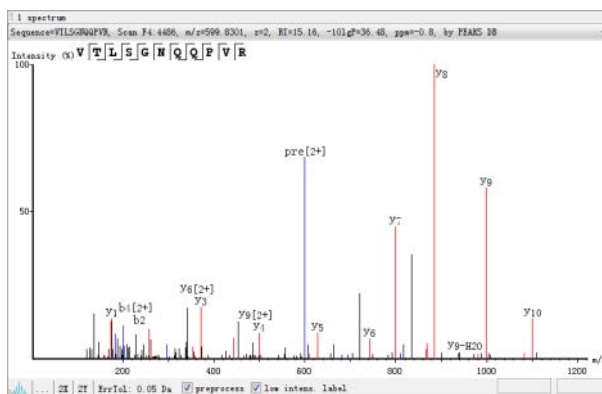



gi | 225445883

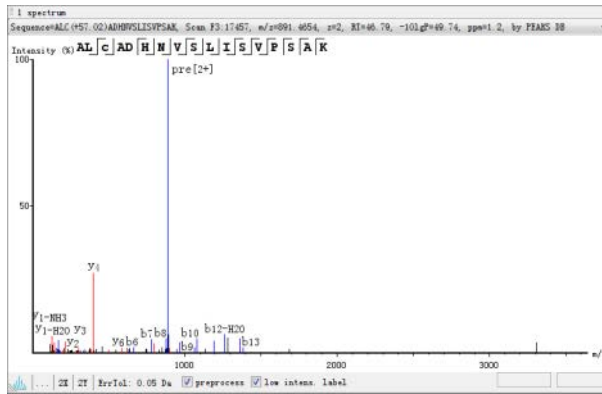

gi | 225446046

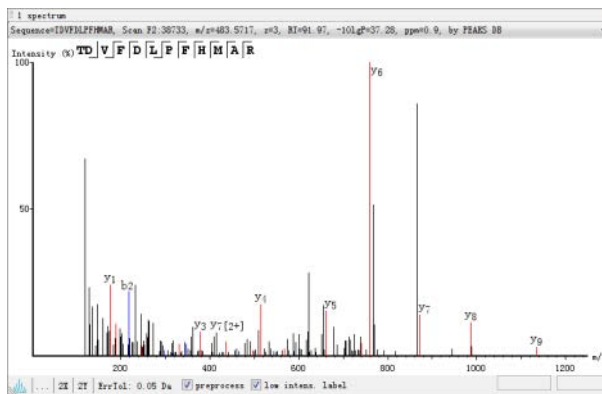

gi | 225446899

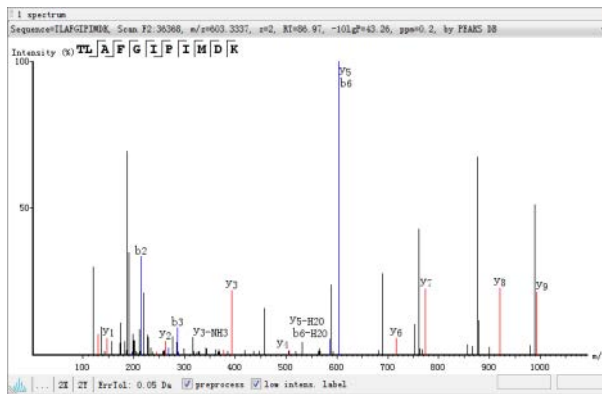

gi | 225447510

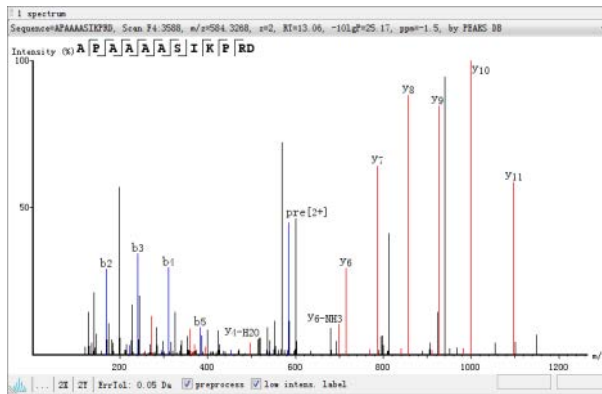

gi | 225447584

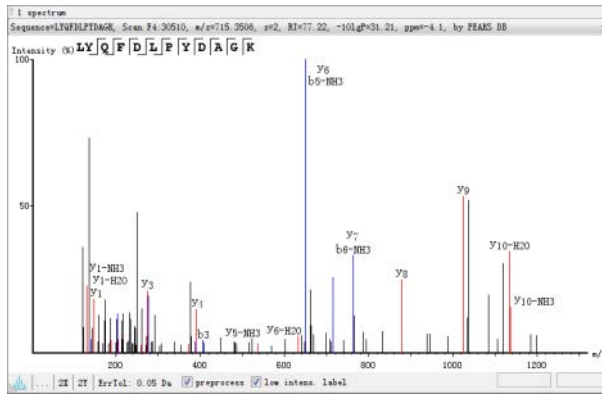

gi | 225447707

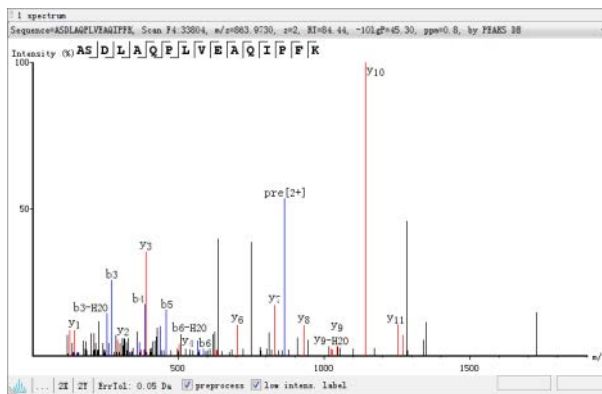

gi | 225449078

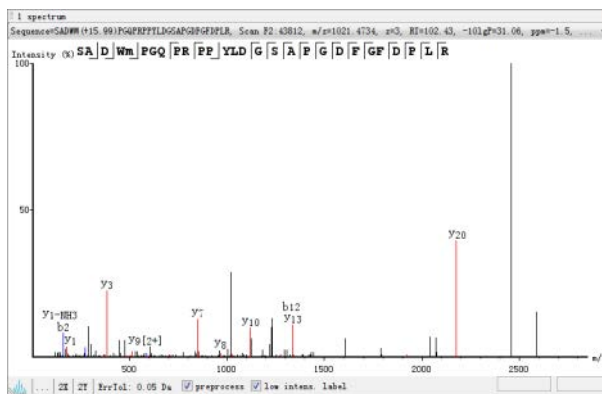

gi | 225449424

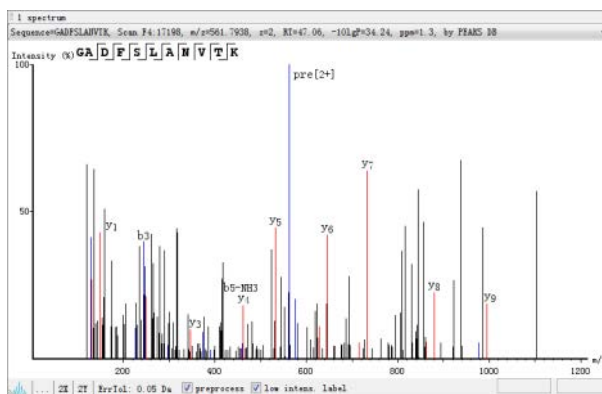

gi | 225450051

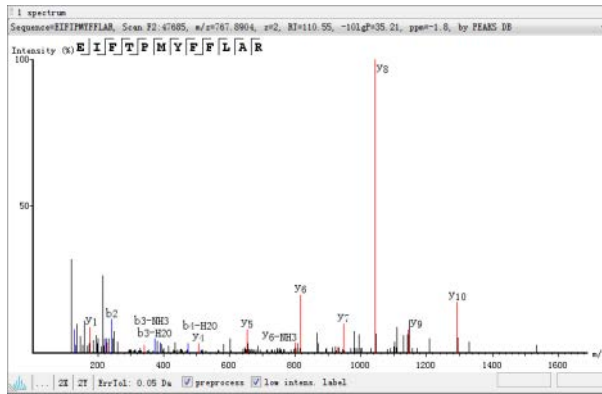

gi | 225451233

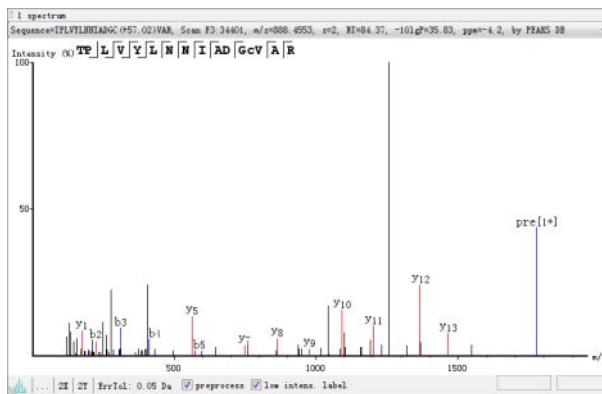

gi | 225452228

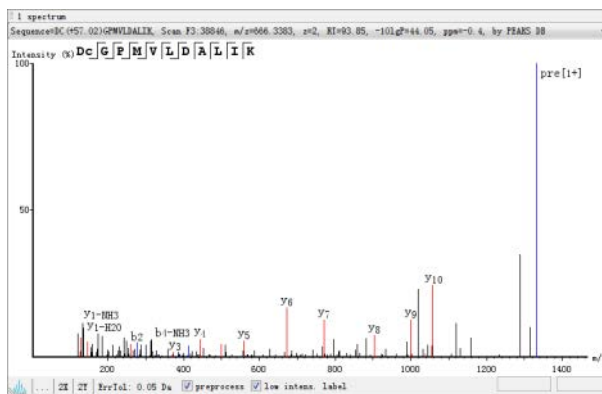

gi | 225452328

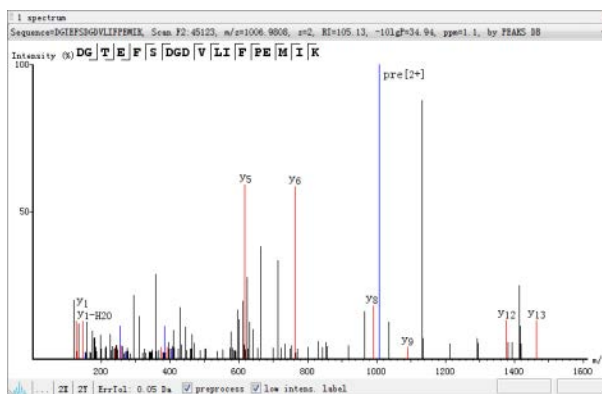

gi | 225452562

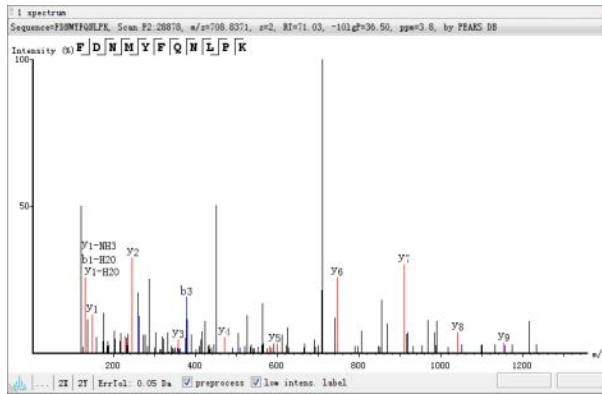

gi | 225454791

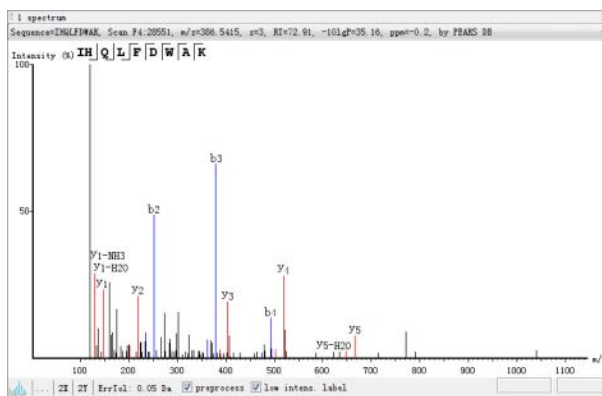

gi | 225454994

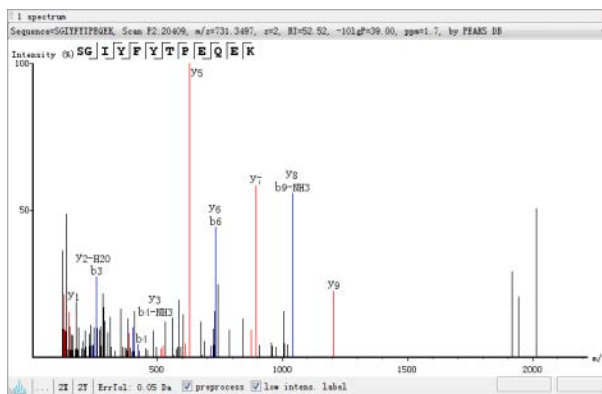

gi | 225455232

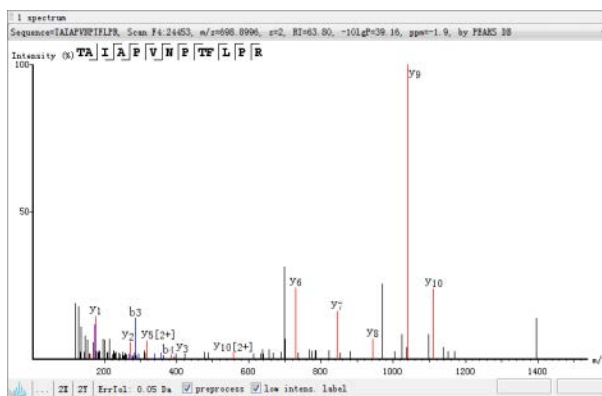

gi | 225455386

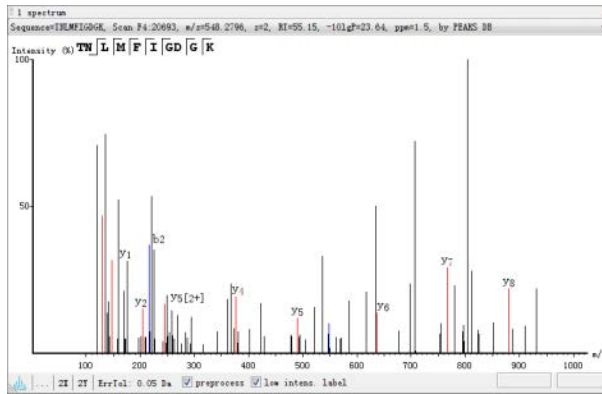

gi | 225455902

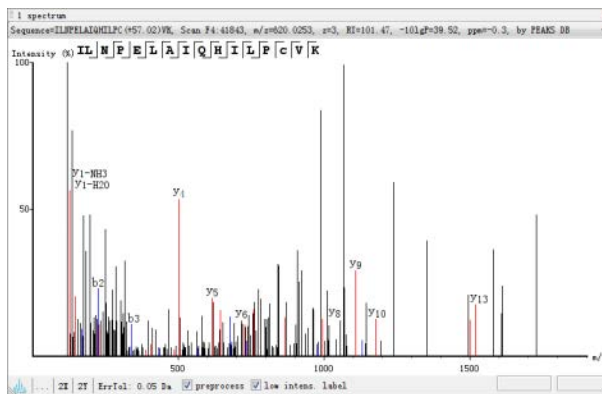

gi | 225456262

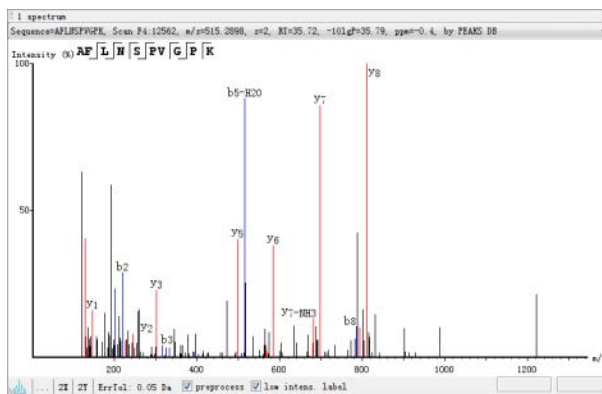

gi | 225456459

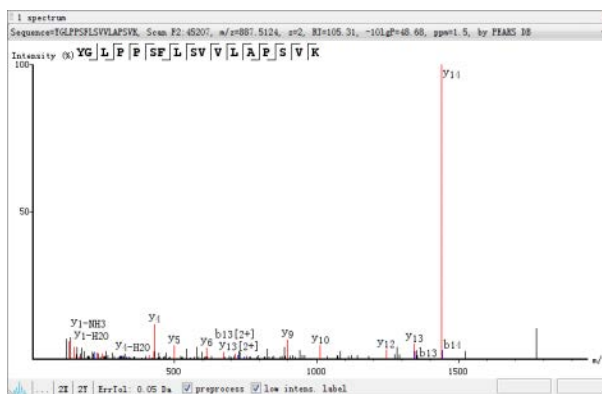

gi | 225456641

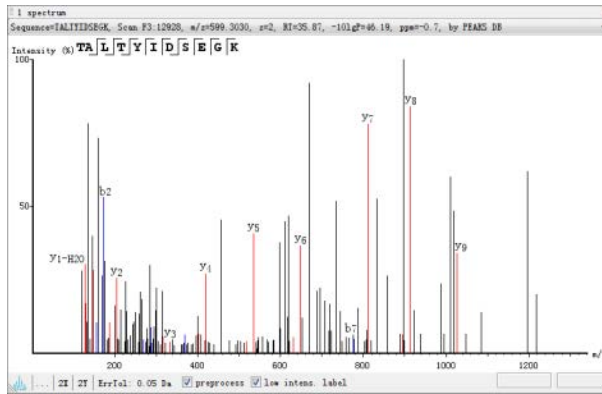

gi | 225457502

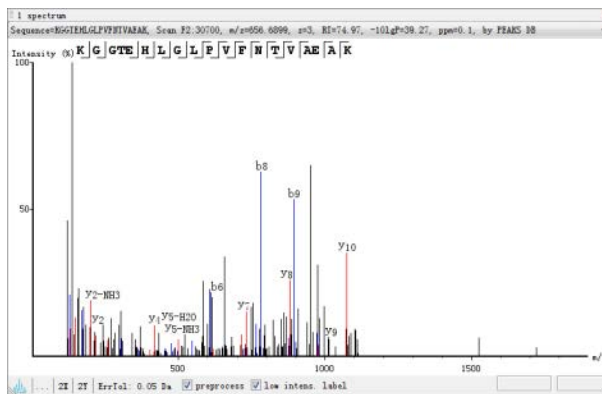

gi | 225458719

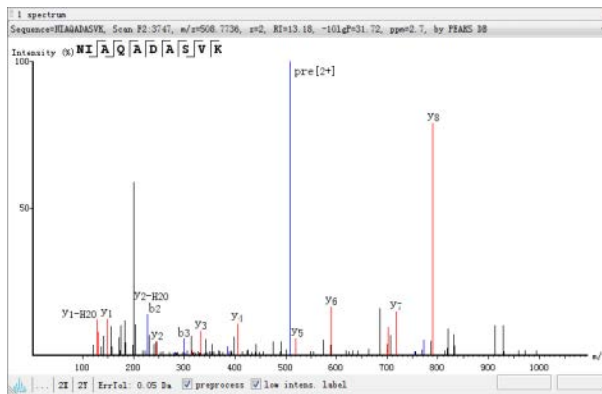

gi | 225459126

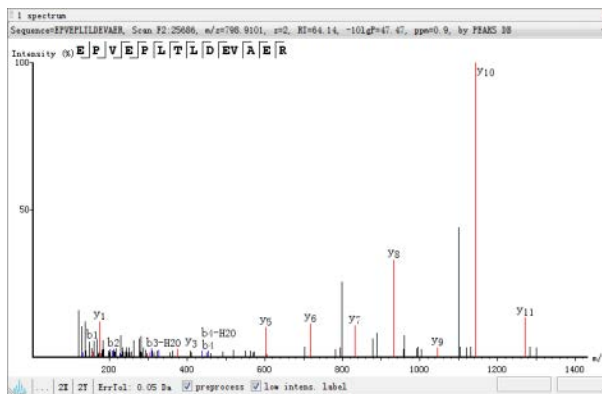

gi | 225459360

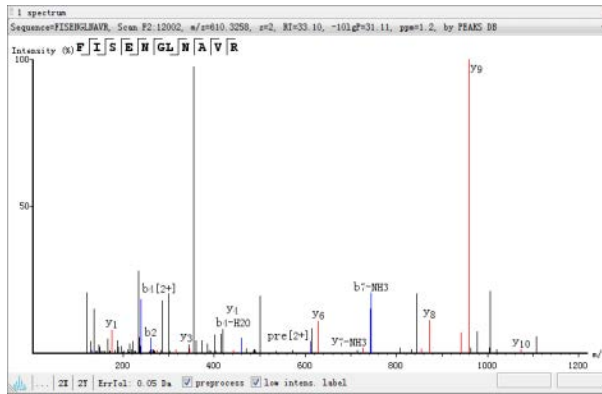

gi | 225459808

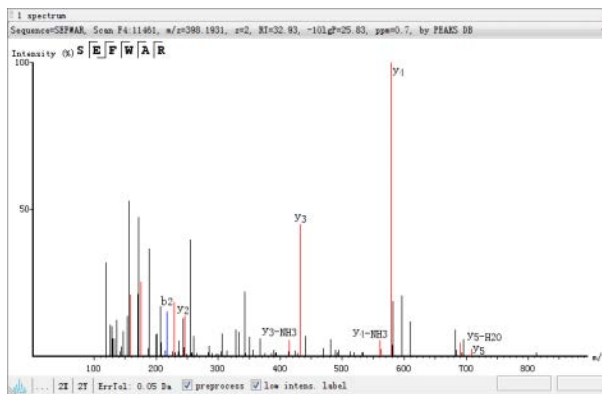

gi | 225461906

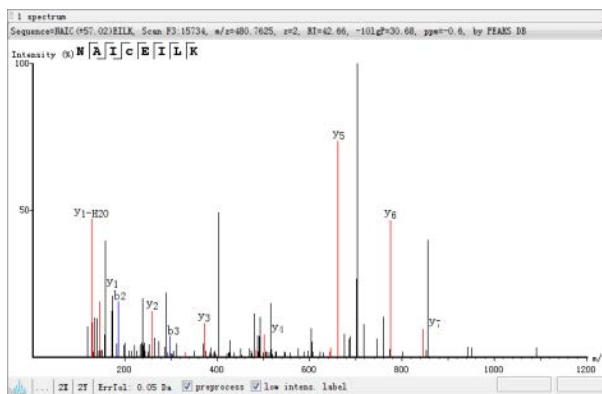

gi | 225462922

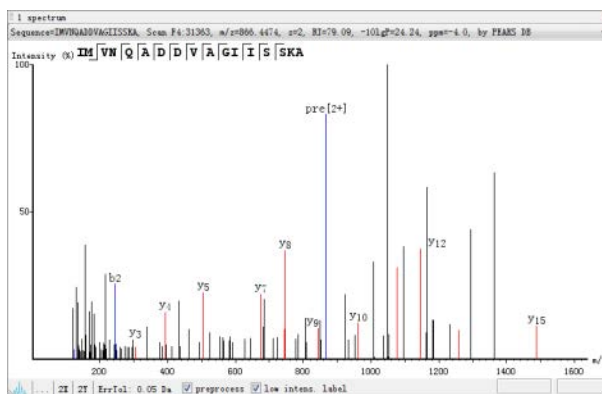

gi | 225463163

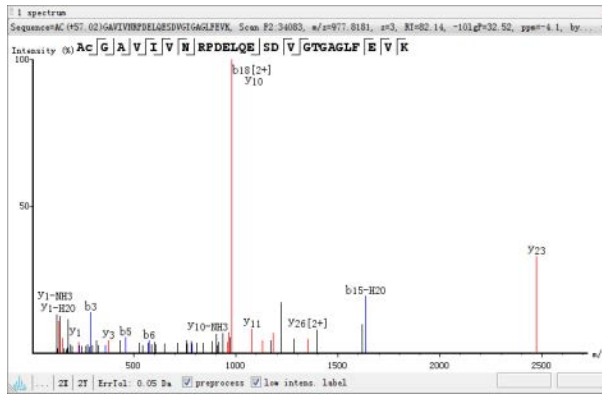

gi | 225463253

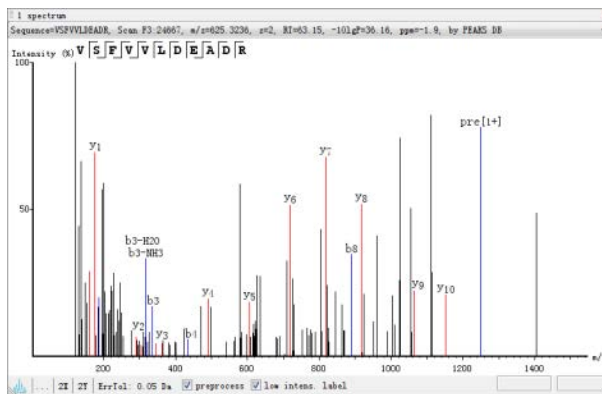

gi | 225463556

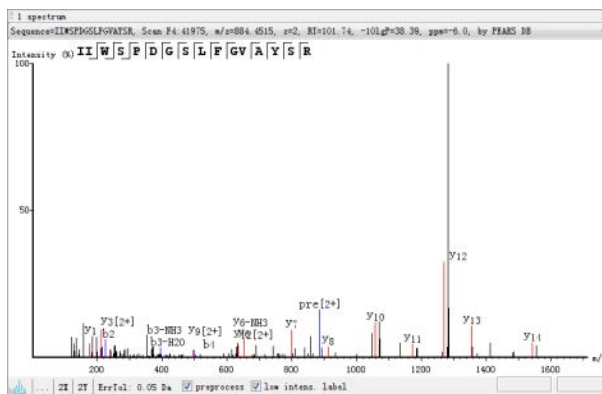

gi | 225465259

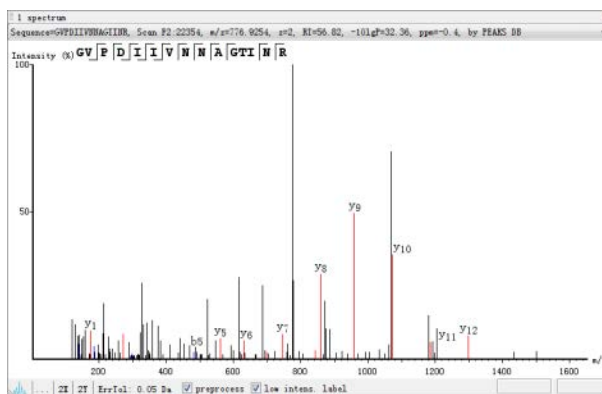



gi | 225465945

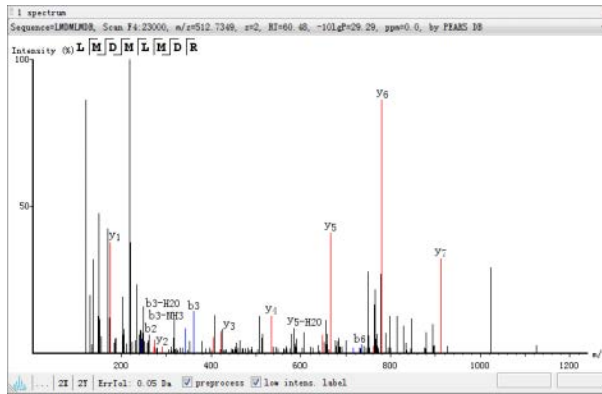

gi | 359473789

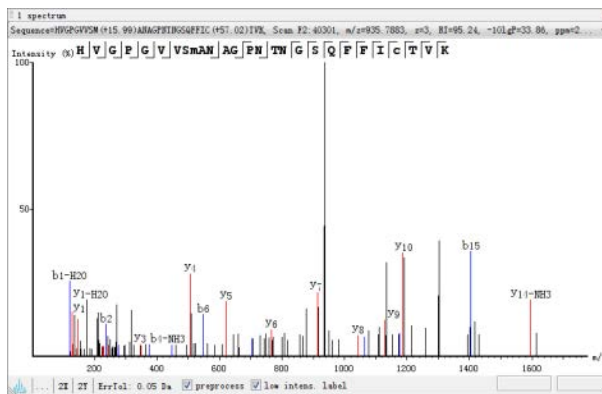

gi | 359476269

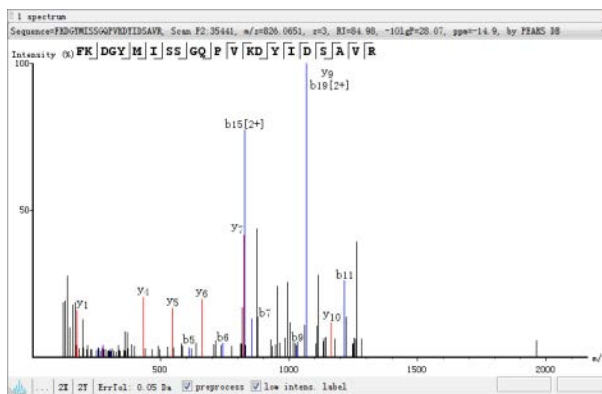

gi | 359476926

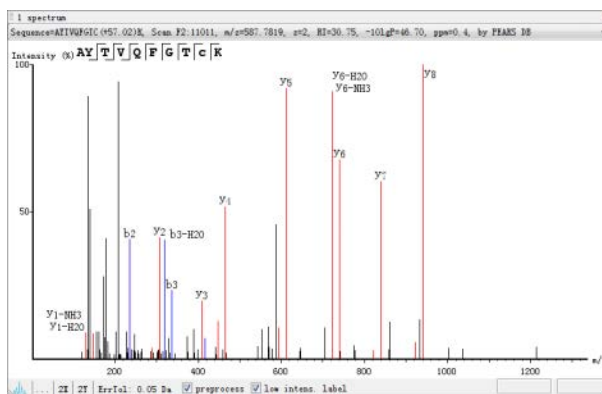

gi | 359478076

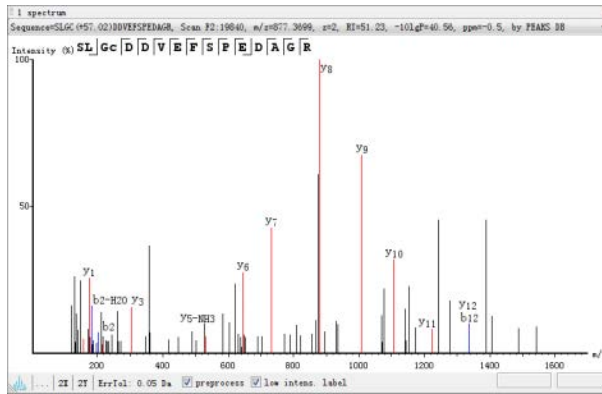

gi | 359478415

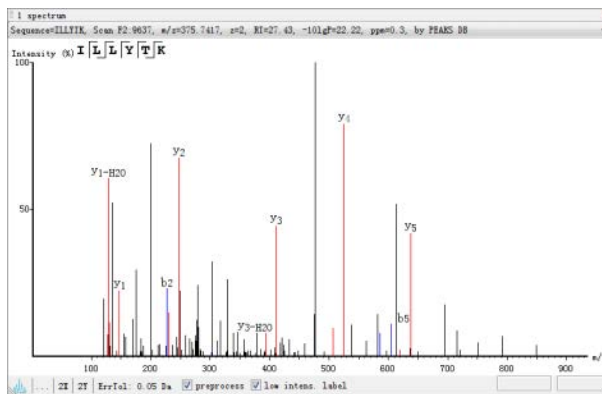

gi | 359480225

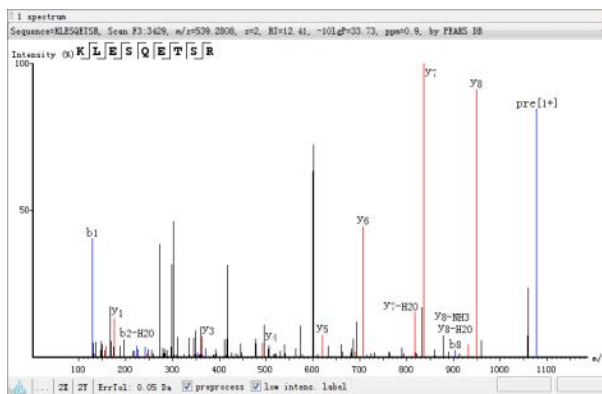

gi | 359482256

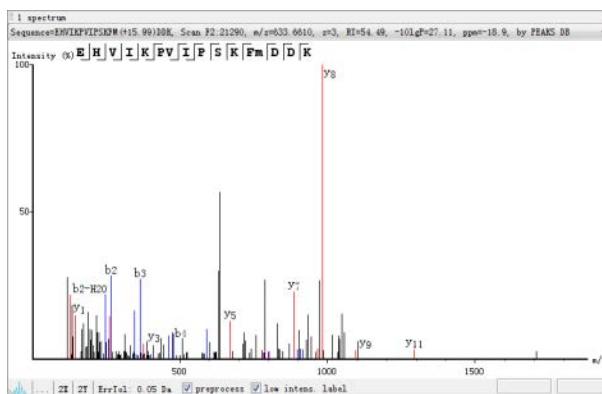

gi | 359482834

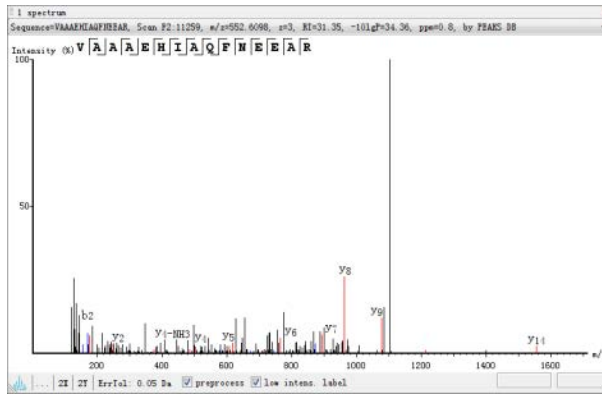

gi | 359486976

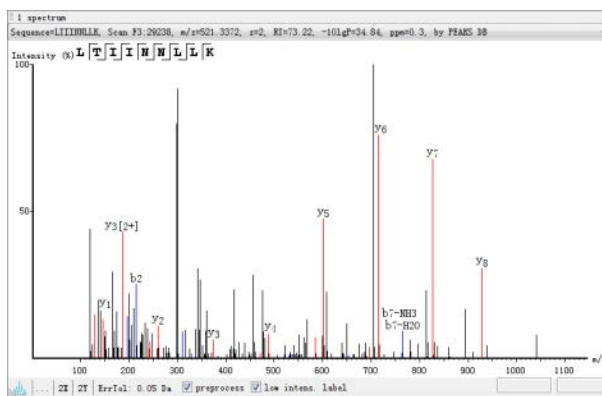

gi | 359487708

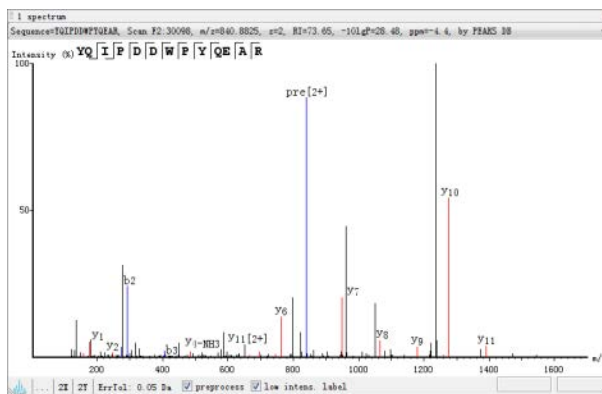

gi | 359487733

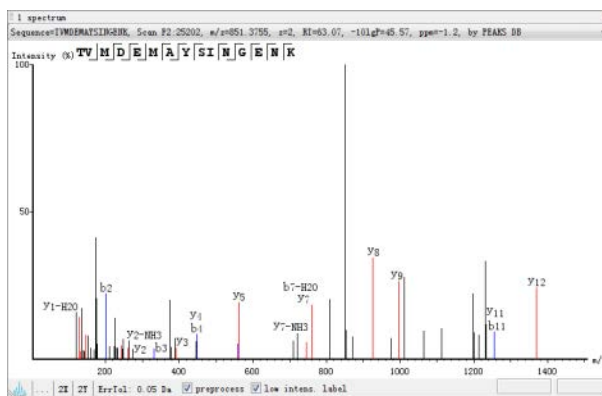

gi | 359489456

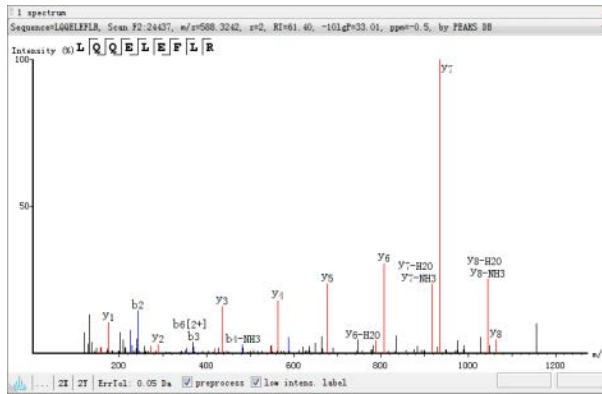

gi | 359492510

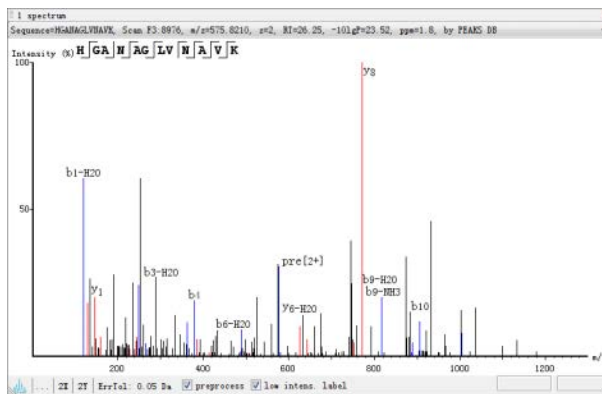

gi | 359494696

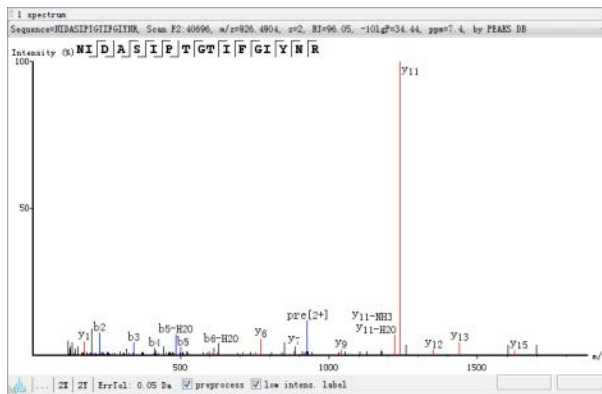

gi | 359495836

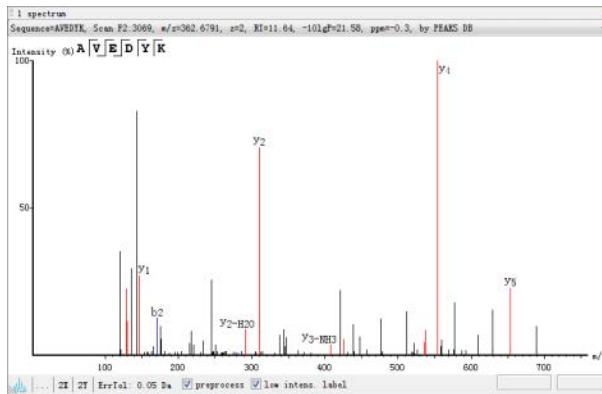

gi | 359497879

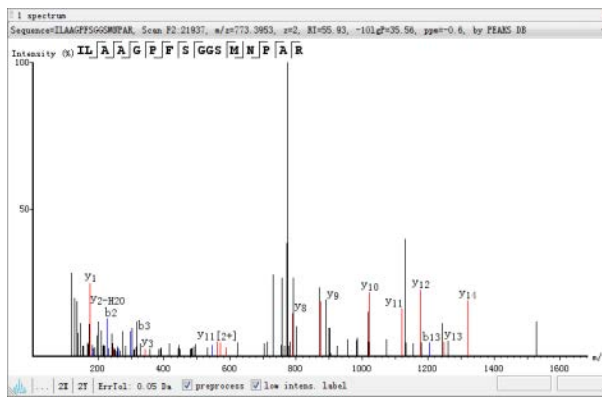

gi | 526117331

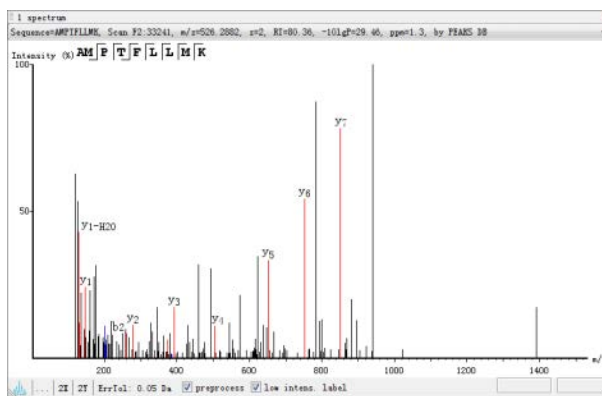

gi | 526117729

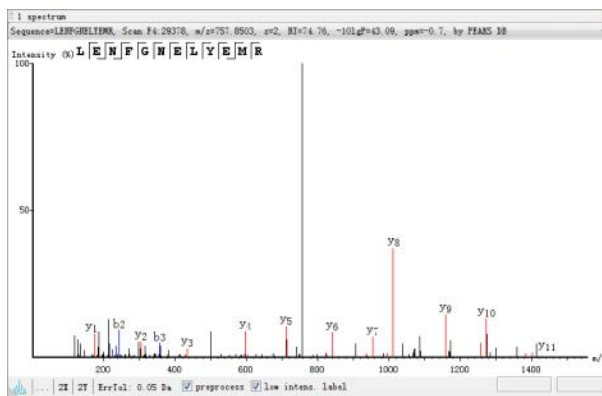

gi | 526117964

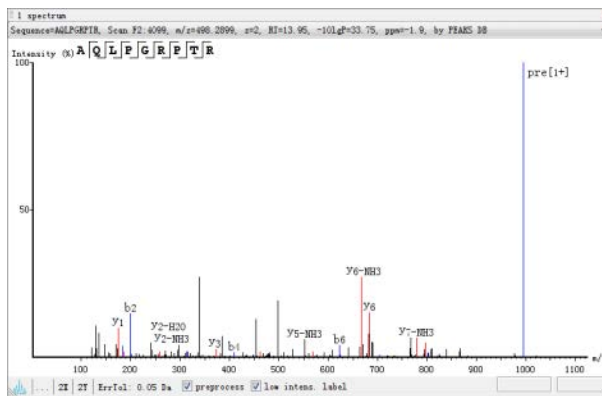

gi | 566146661

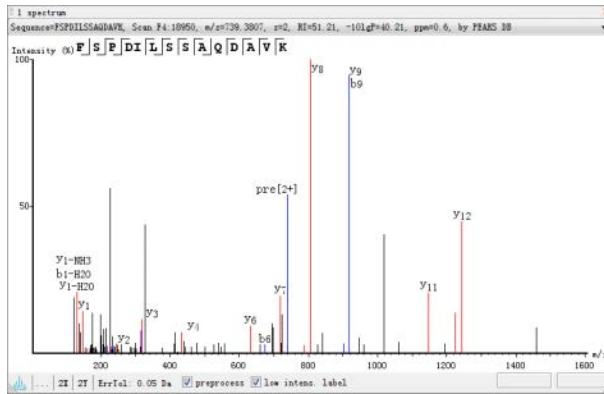

gi | 566148044

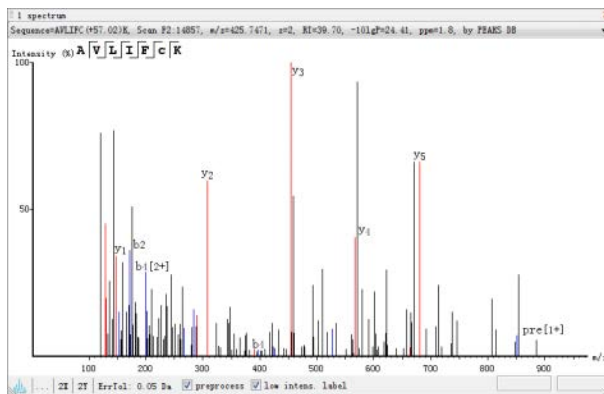

gi | 566148676

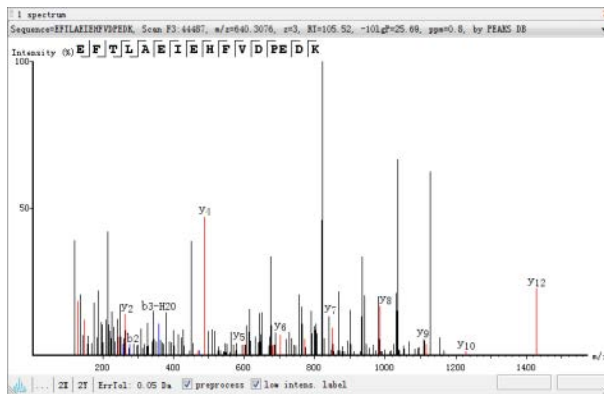

gi | 566149094

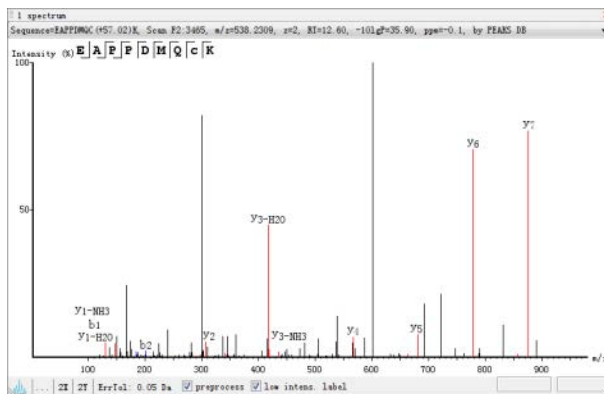

gi | 566149831

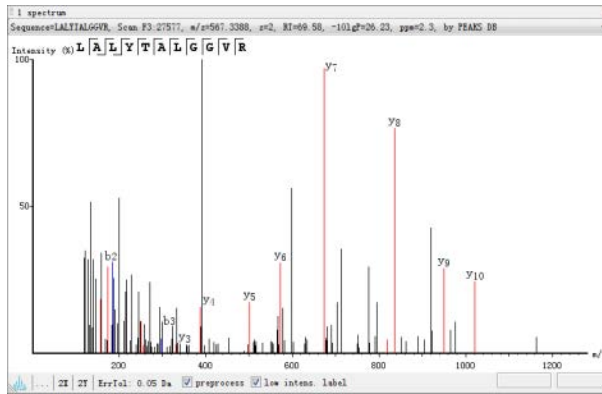

gi | 566150858

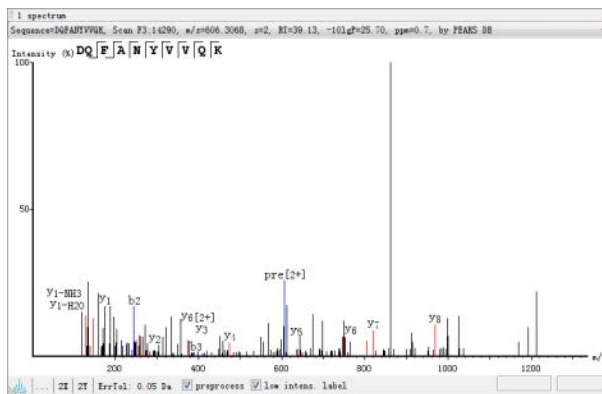

gi | 566153514

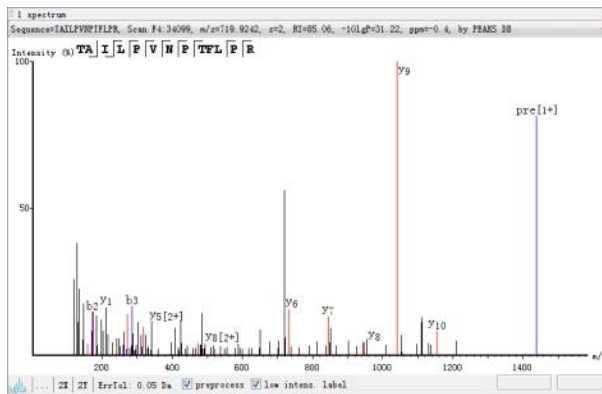

gi | 566156766

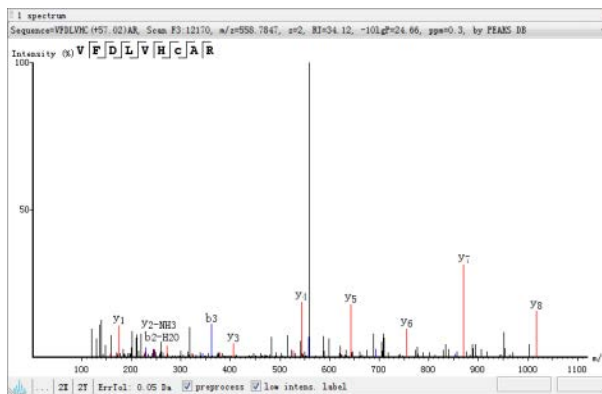

gi | 566157027

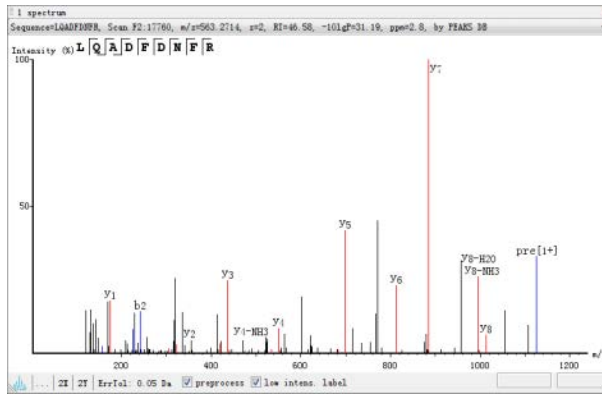

gi | 566157463

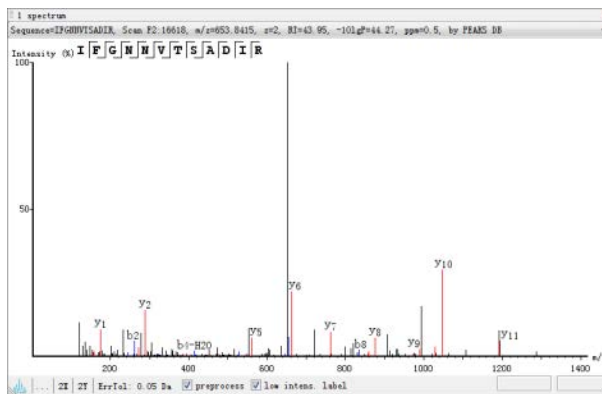

gi | 566159456

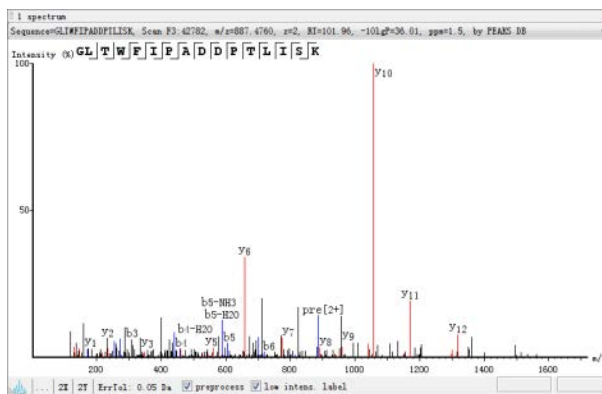

gi | 566160209

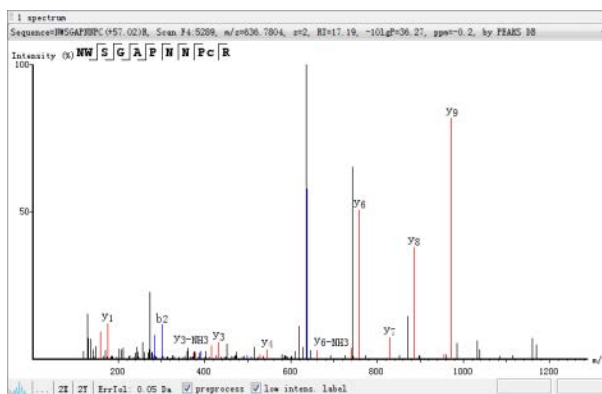



gi | 566160505

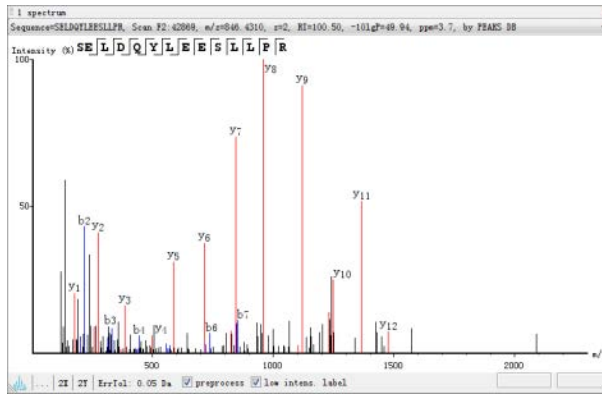

gi | 566160621

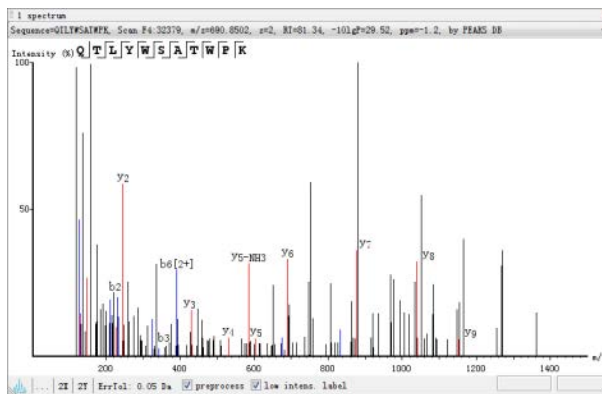

gi | 566160631

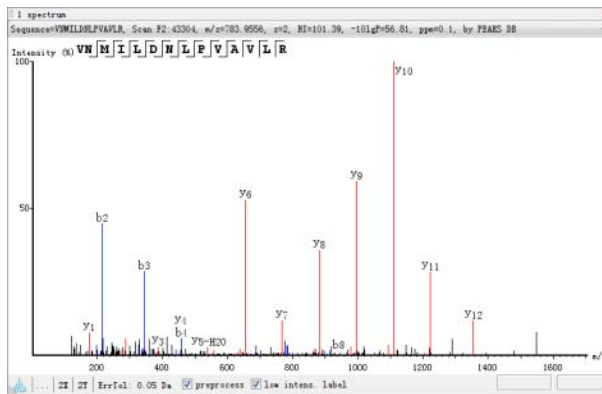

gi | 566161176

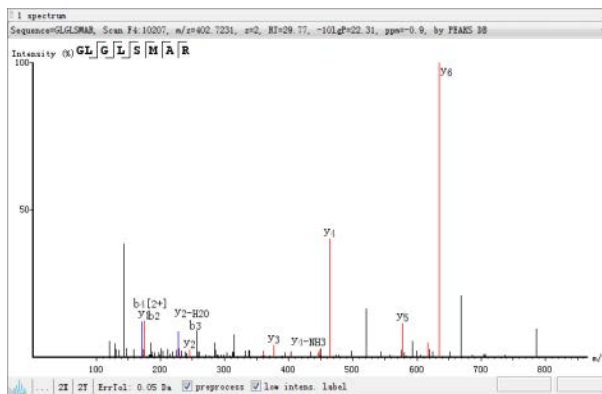

gi | 566161648

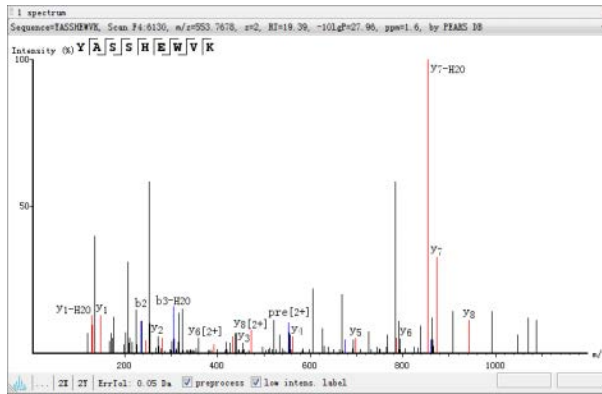

gi | 566161892

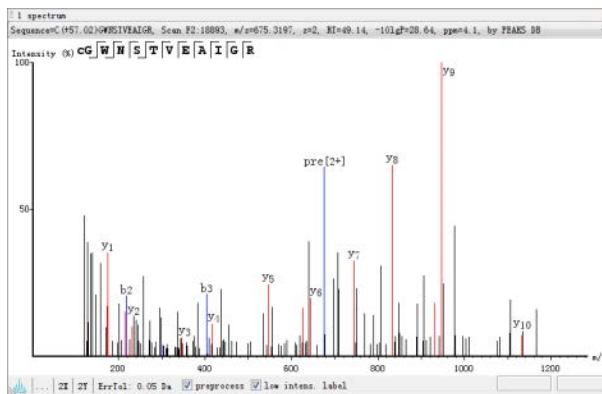

gi | 566167505

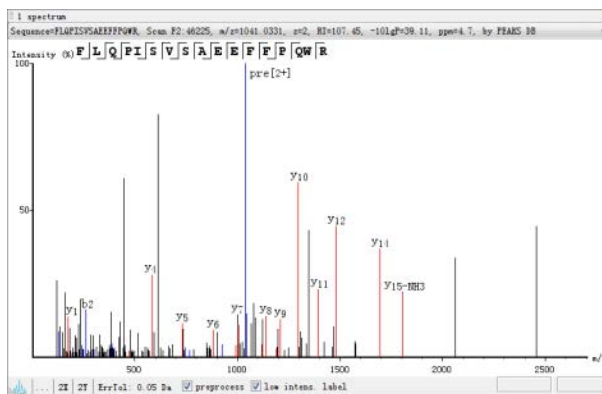

gi | 566168071

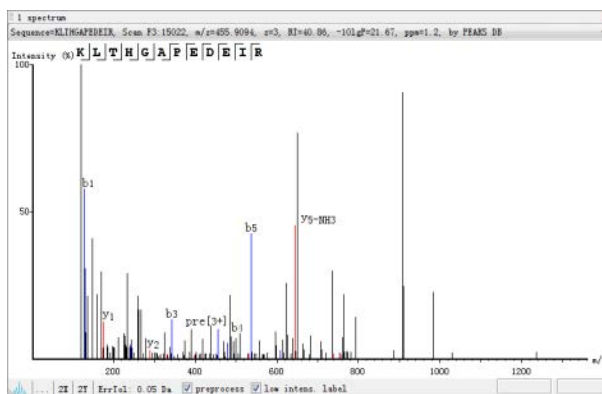

gi | 566168111

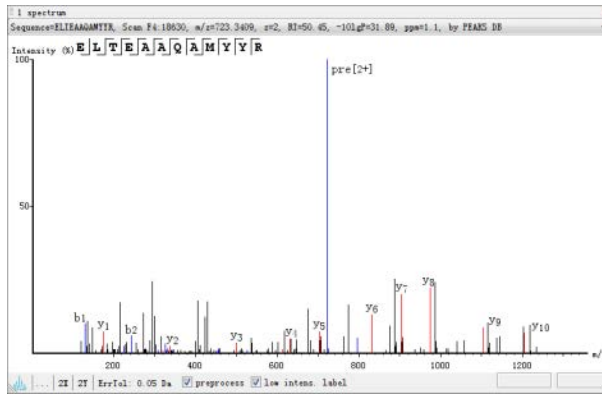

gi | 566168611

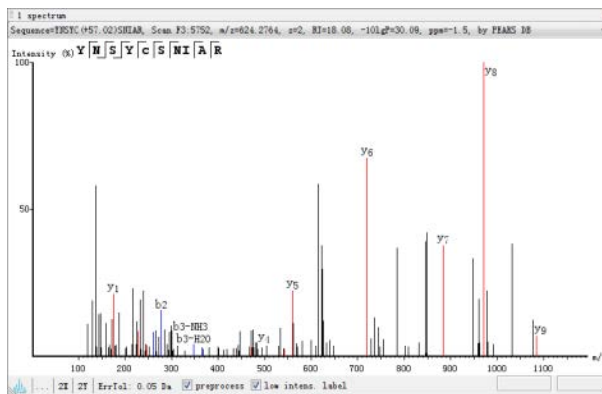

gi | 566170203

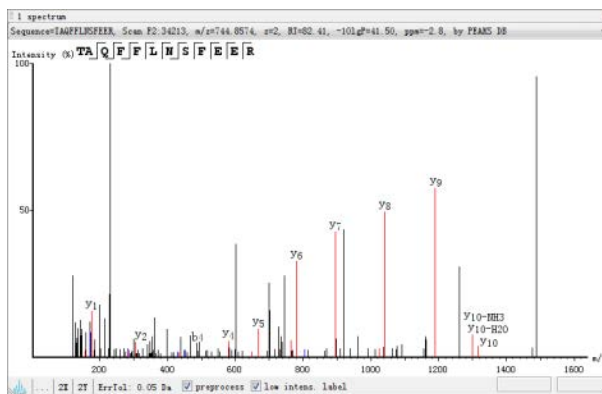

gi | 566170807

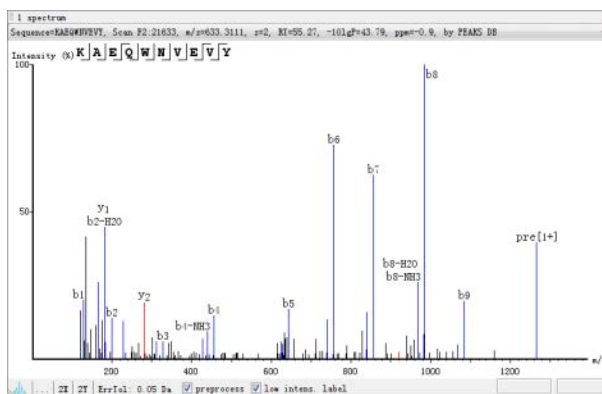

gi | 566170882

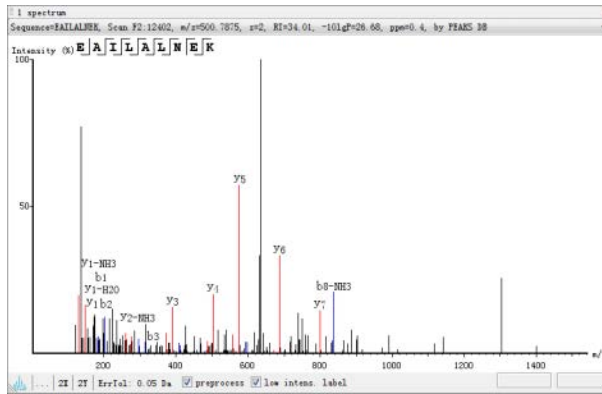

gi | 566171760

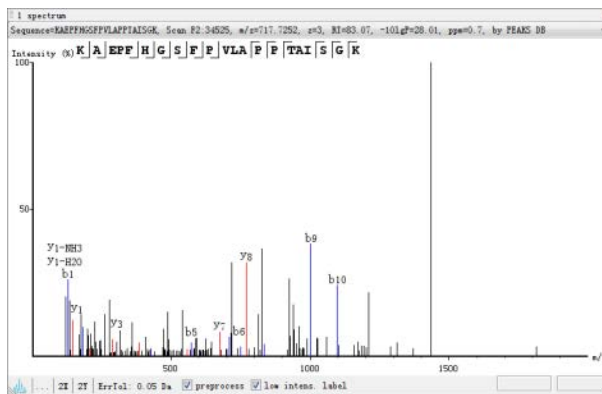

gi | 566173207

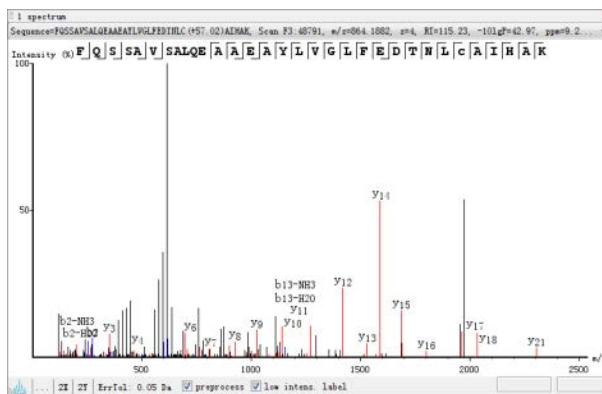

gi | 566173751

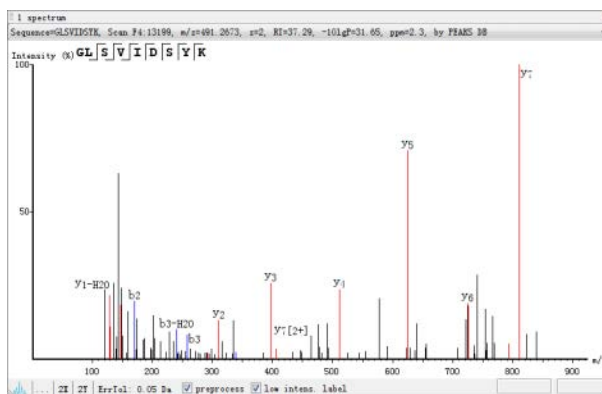

gi | 566174372

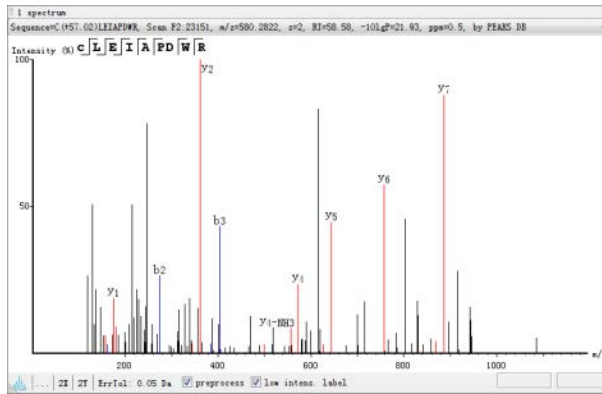

gi | 566175530

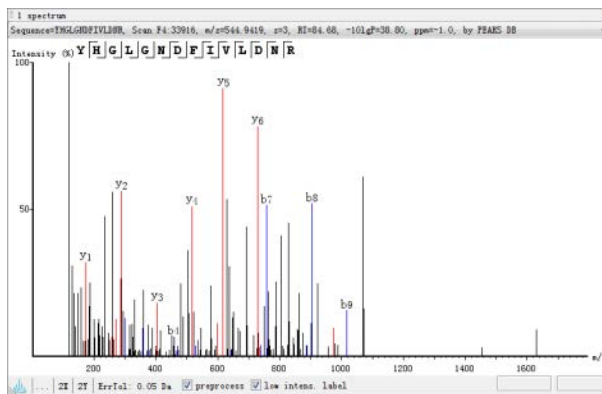

gi | 566176113

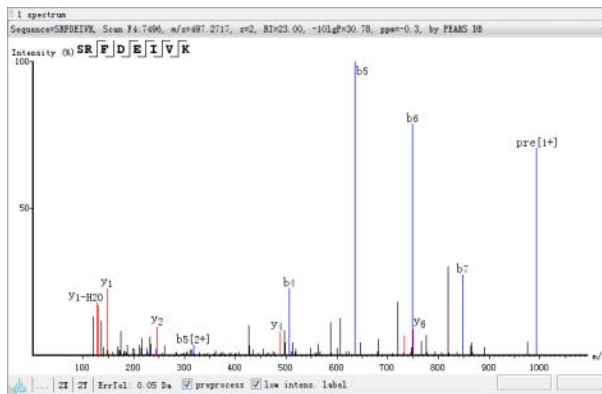

gi | 566177300

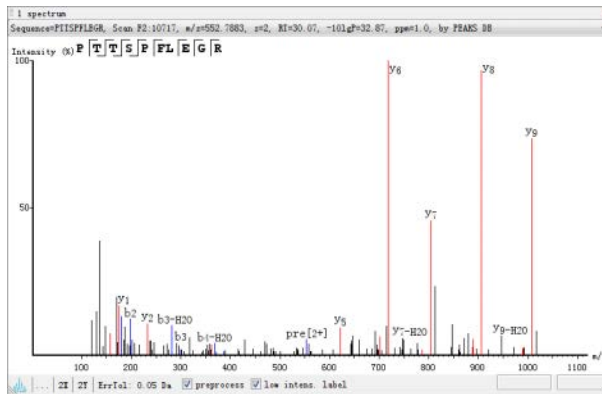

gi | 566181315

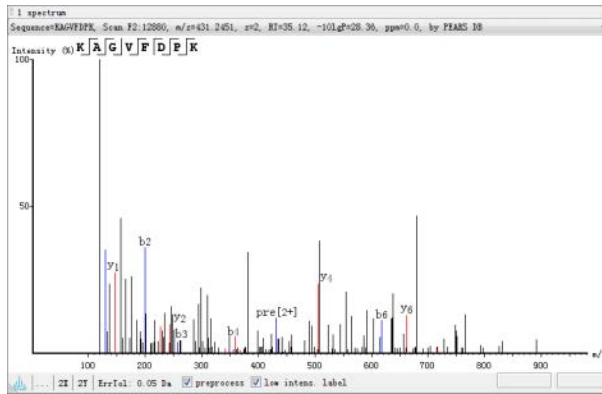

gi | 566181342

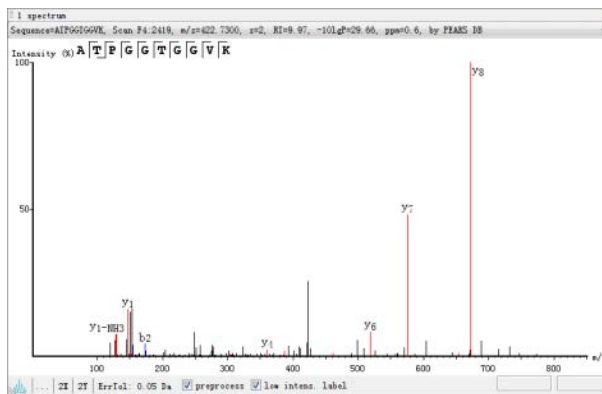

gi | 566185250

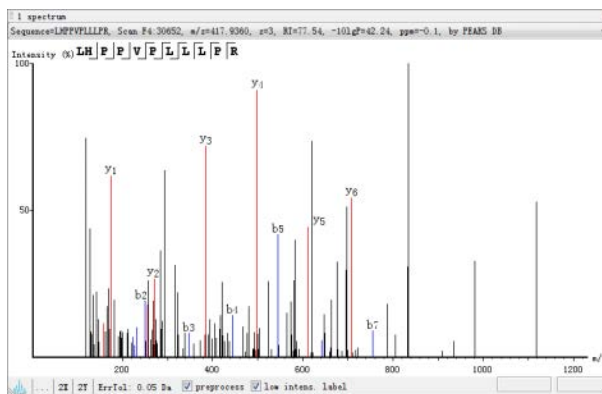

gi | 566185272

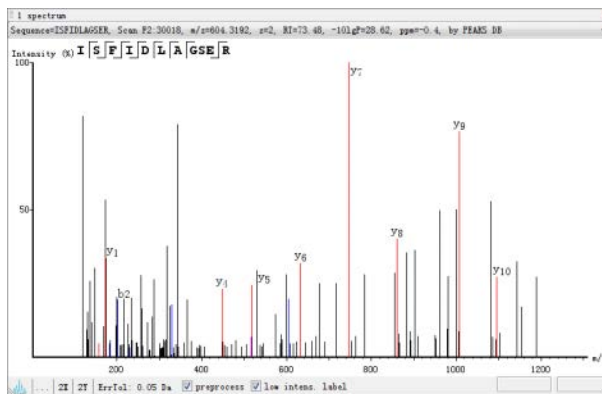

gi | 566185685

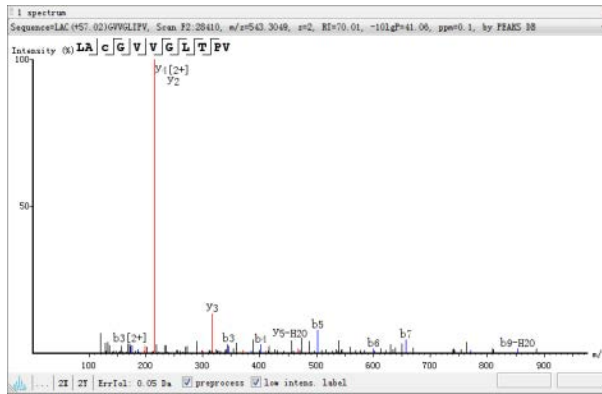

gi | 566188099

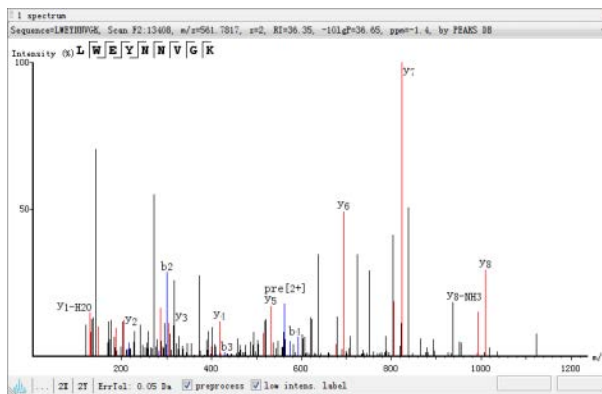

gi | 566188113

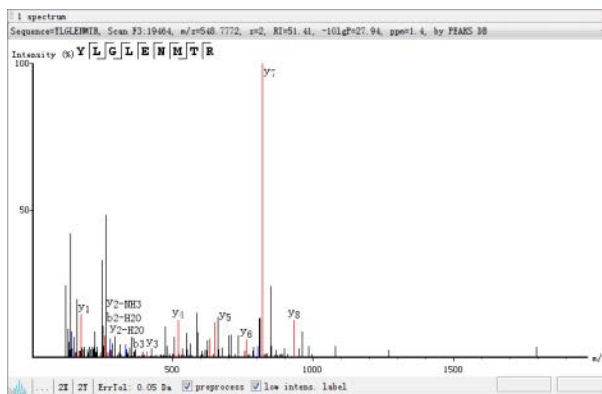

gi | 566188433

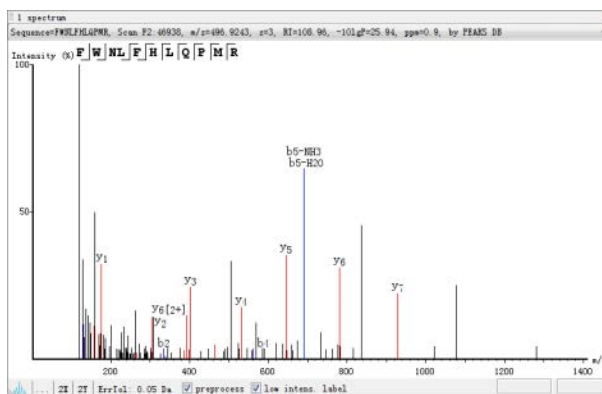

gi | 566188774

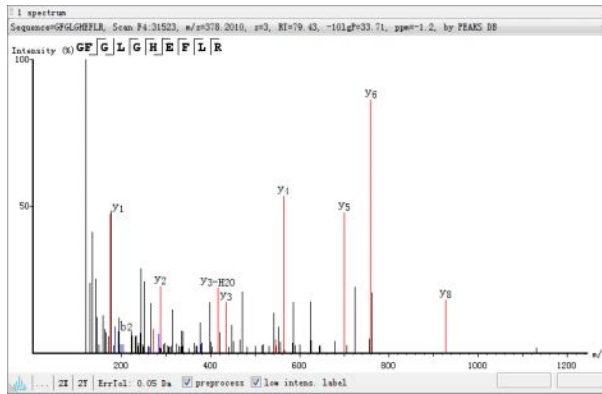

gi | 566191728

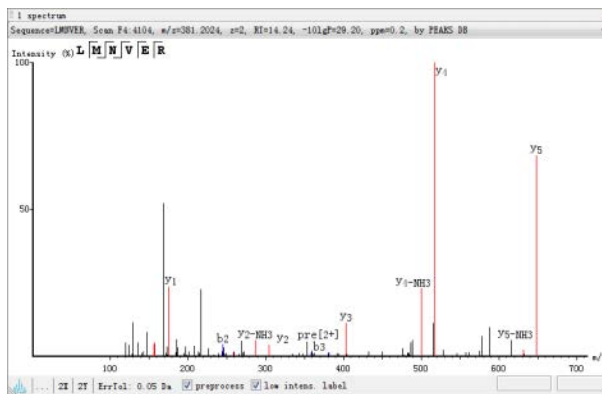

gi | 566195508

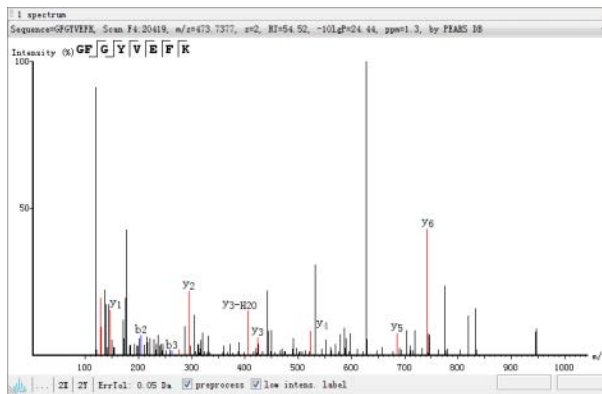

gi | 566195934

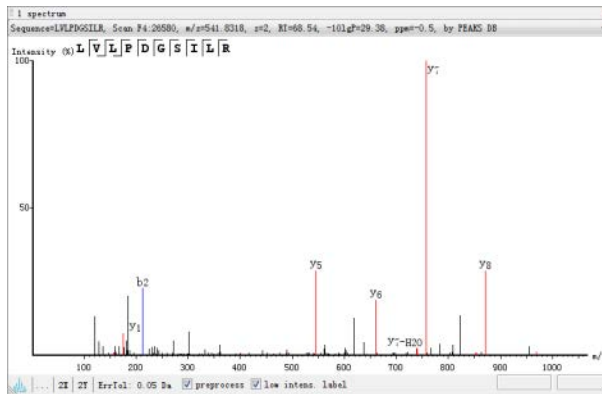



gi | 566197446

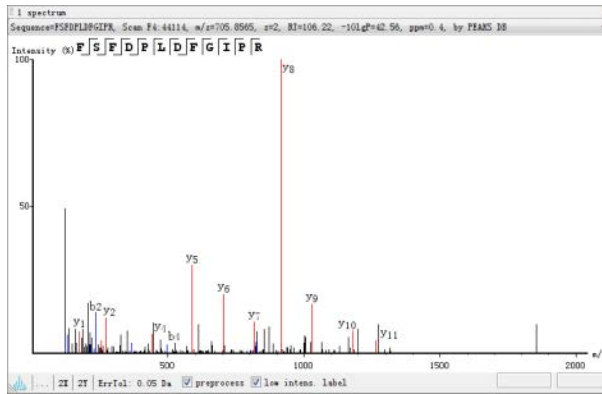

gi | 566197644

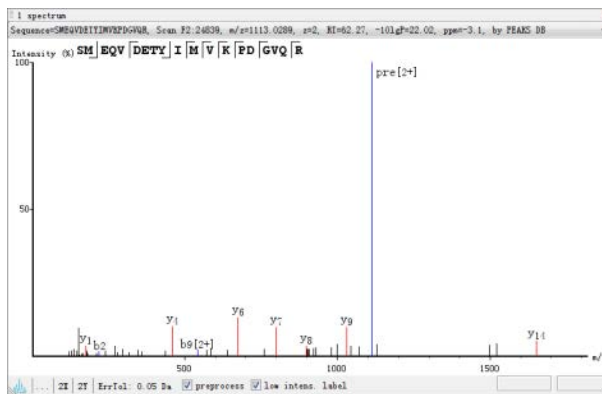

gi | 566199681

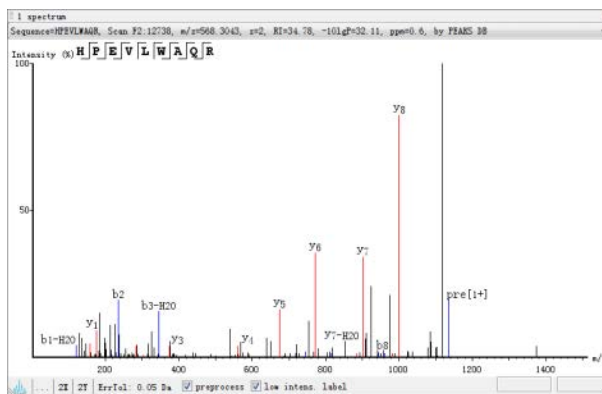

gi | 566200837

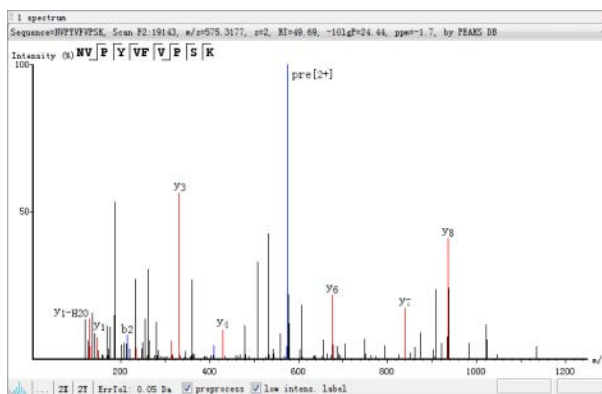



gi | 566206247

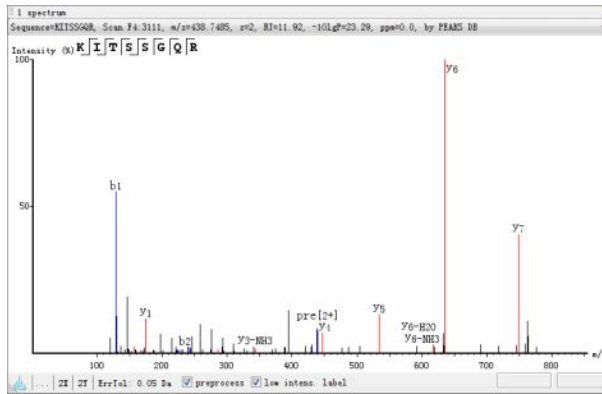

gi | 566207660

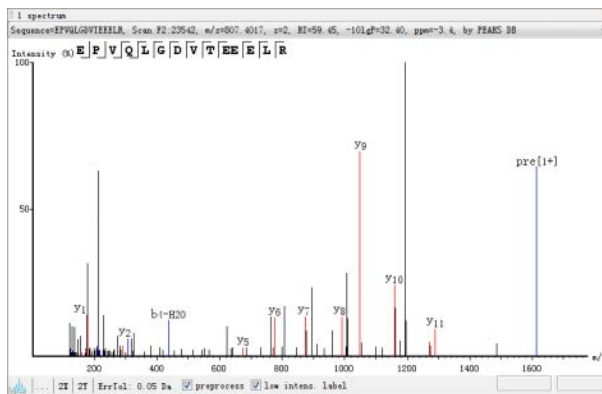

gi | 566207939

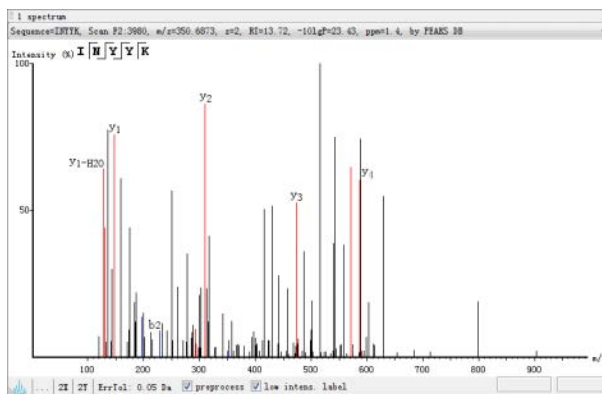

gi | 566208589

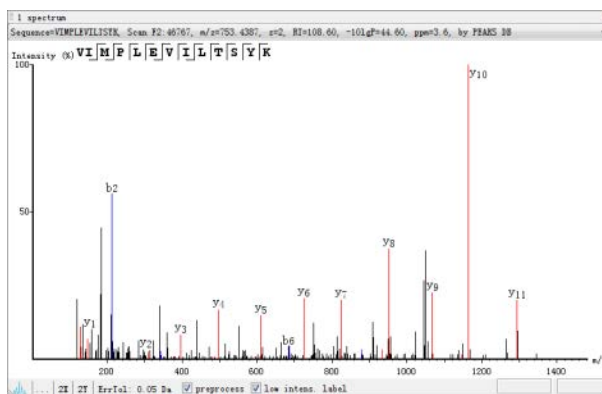

gi | 566208913

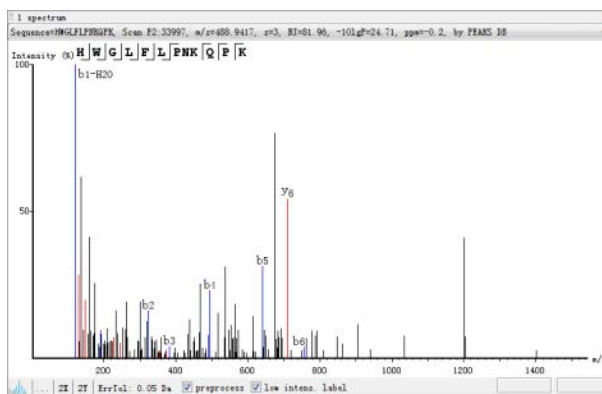

gi | 566209743

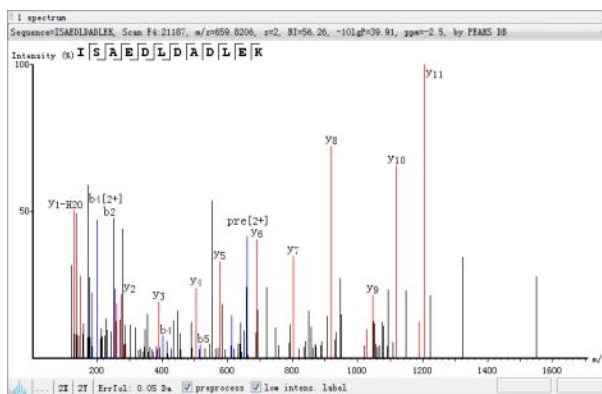

gi | 566210049

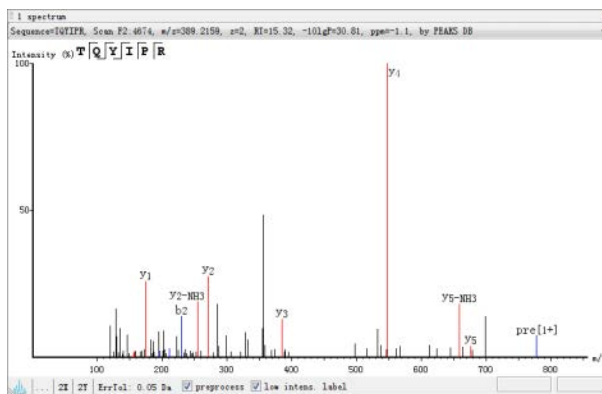

gi | 566210060

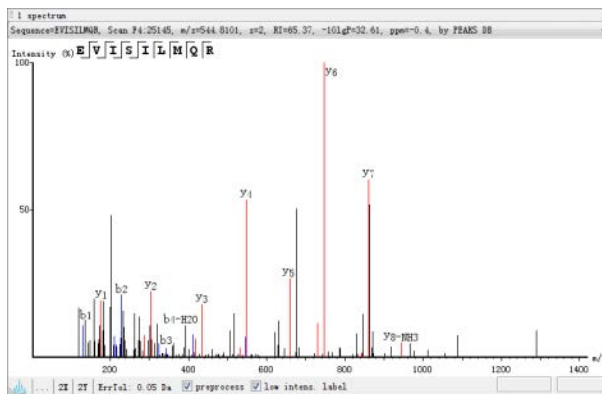

gi | 566210666

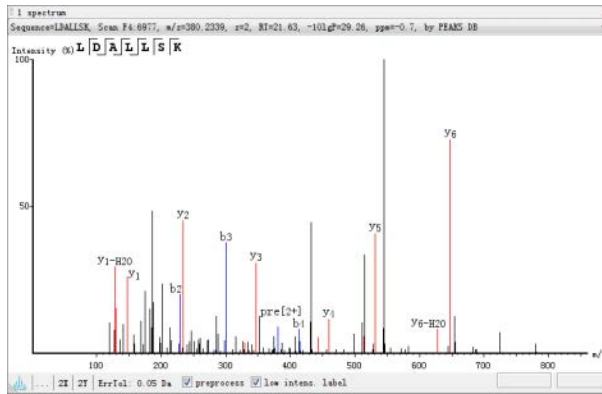

gi | 566211354

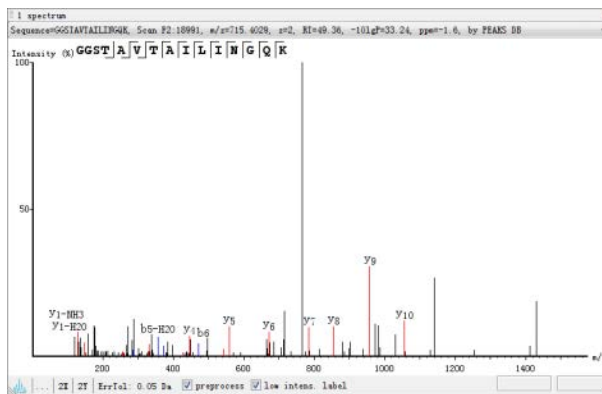

gi | 566212877

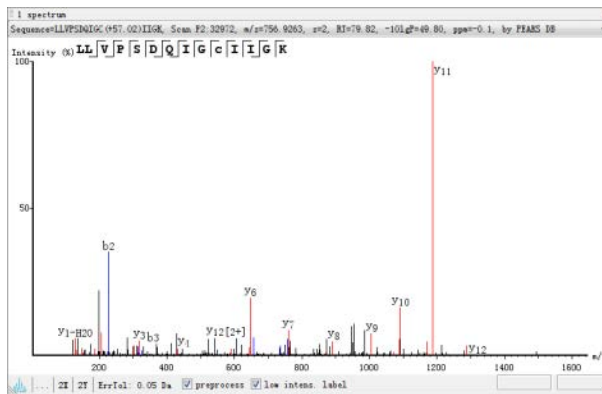

gi | 566213932

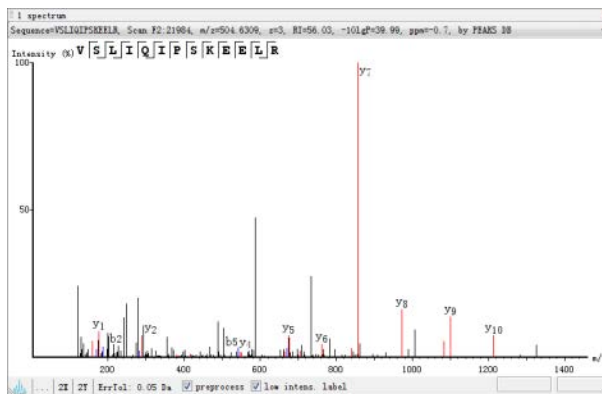

gi | 566214115

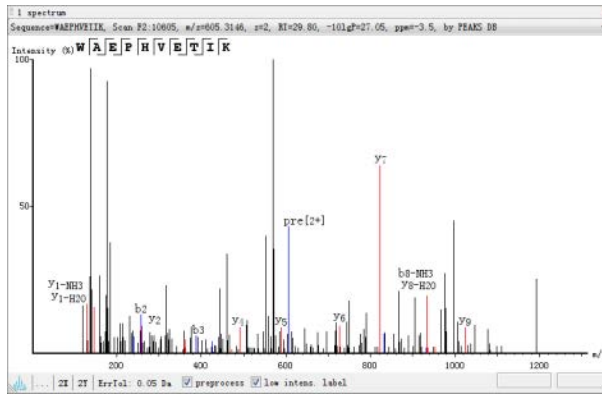

gi | 566215175

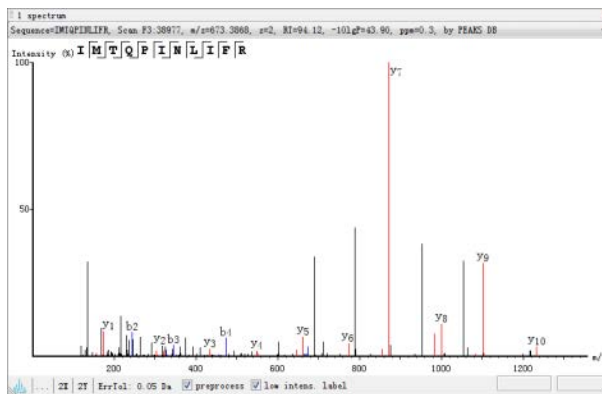

gi | 566215907

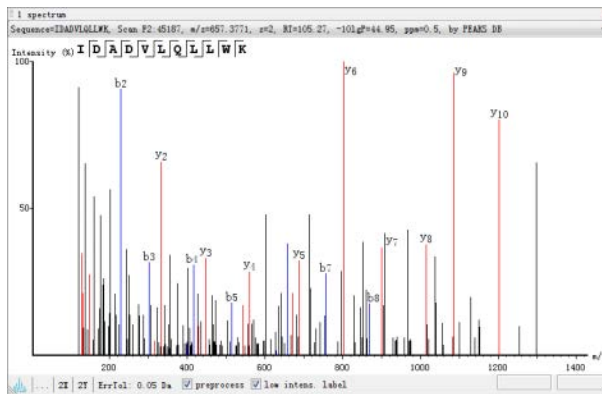

gi | 566245781

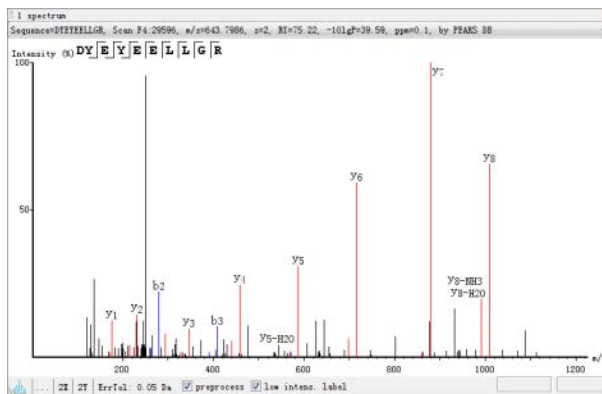

gi | 566253285

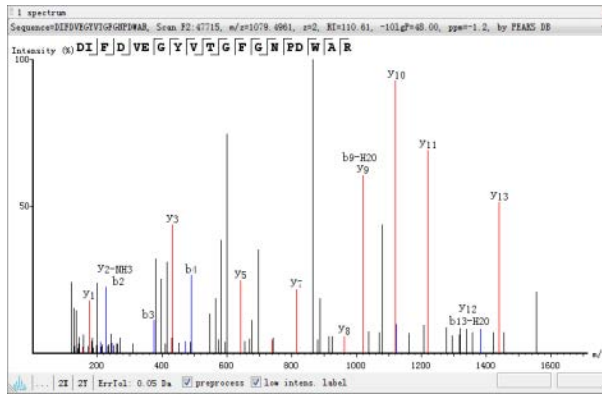

gi | 566256635

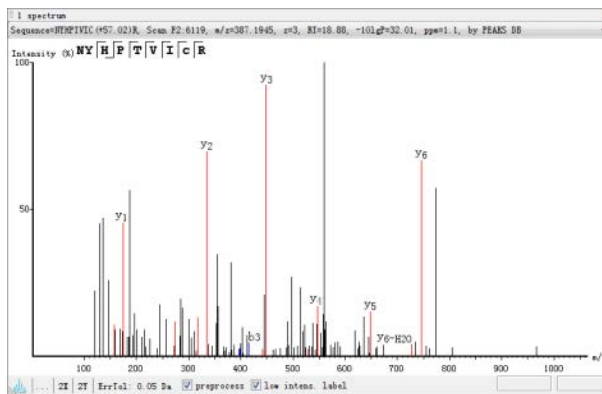

gi | 566259876

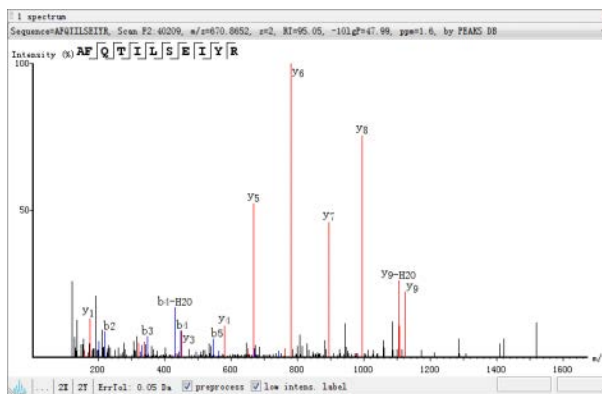

gi | 671743286

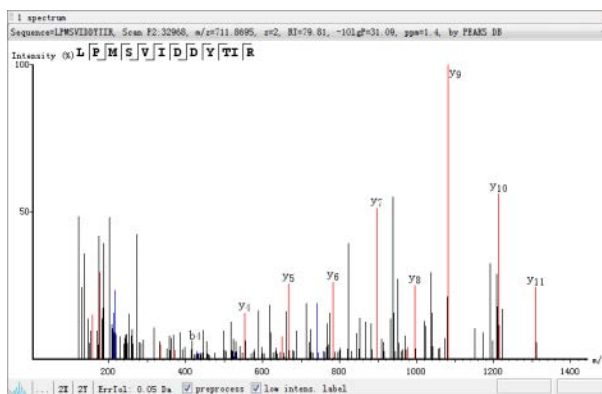

gi | 731370548

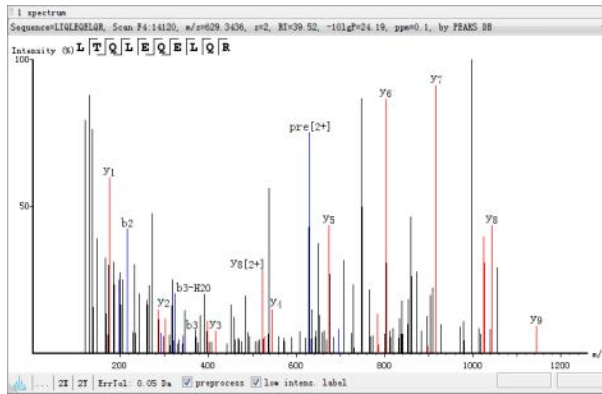

gi | 731370779

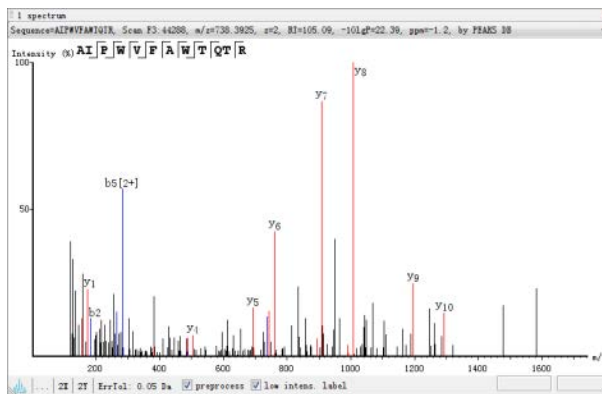

gi | 731380670

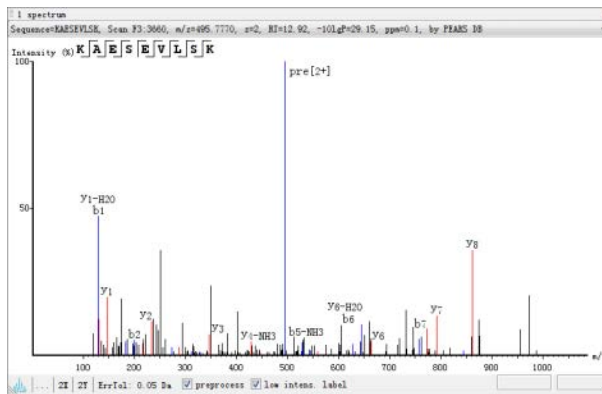

gi | 731381391

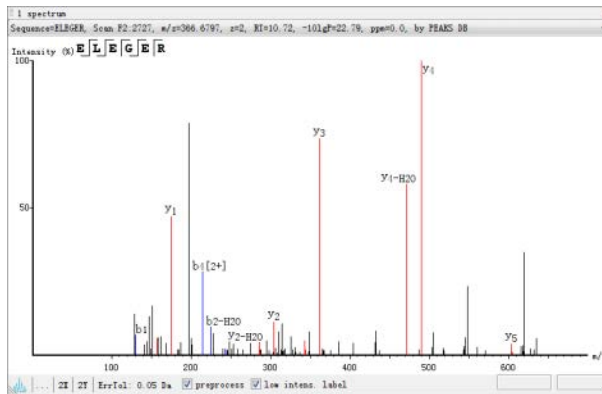



gi | 731382683

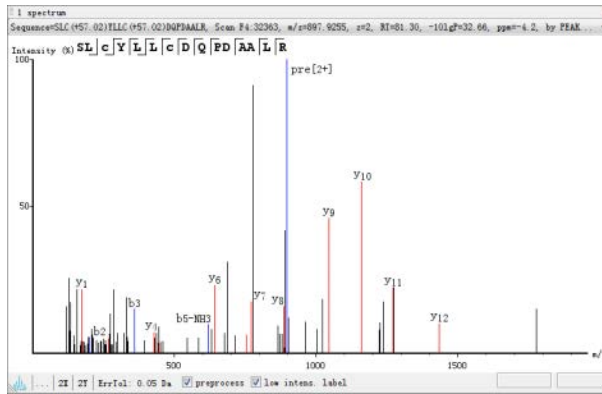

gi | 731384926

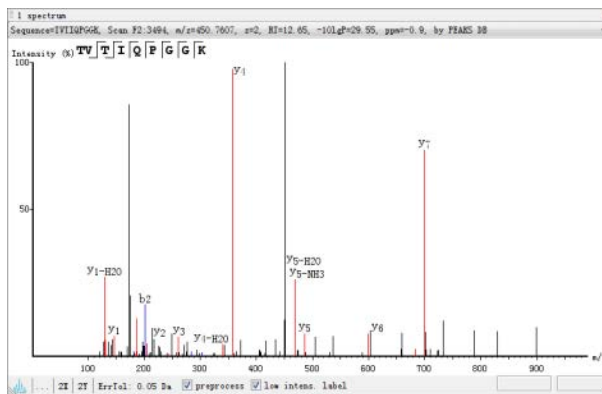

gi | 731386596

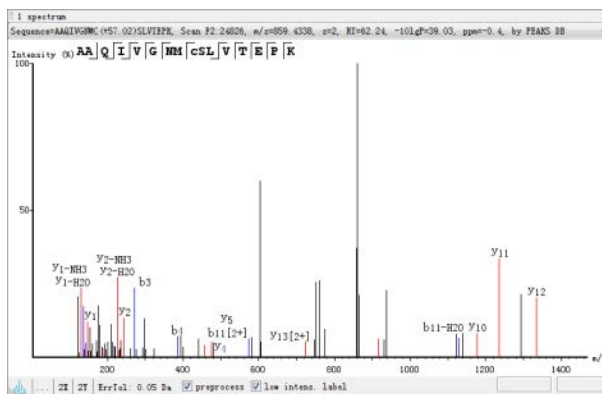

gi | 731387184

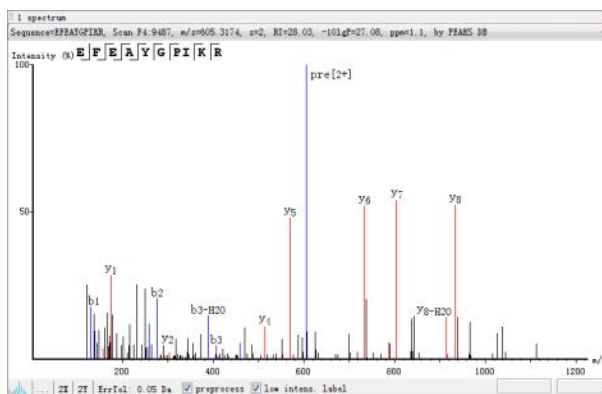

gi | 731387738

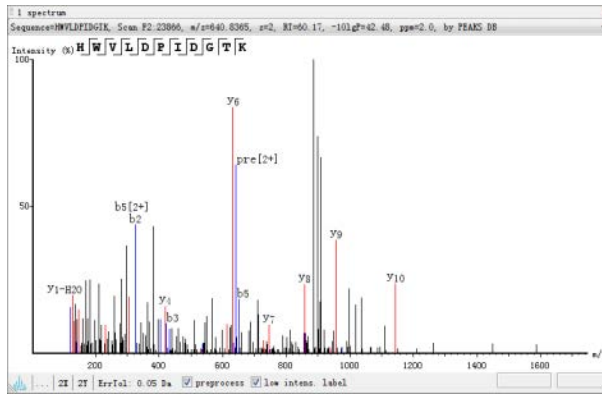

gi | 731393208

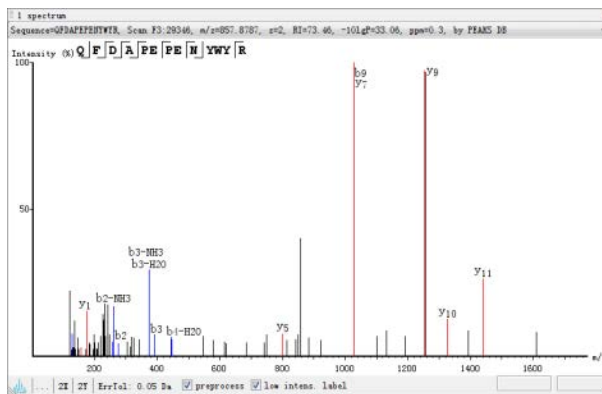

gi | 731393274

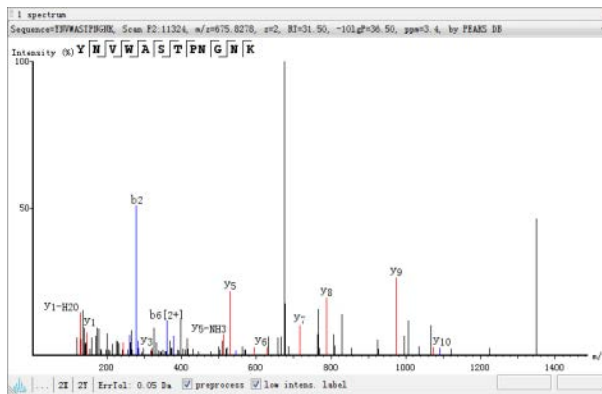

gi | 731393417

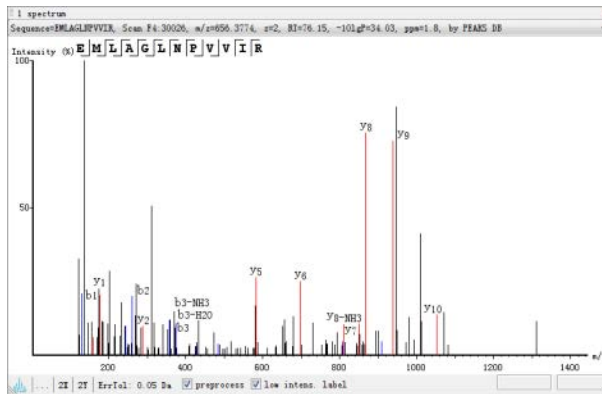

gi | 731393636

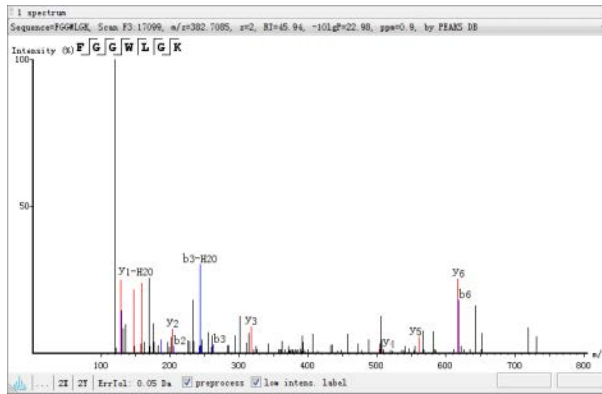

gi | 731394805

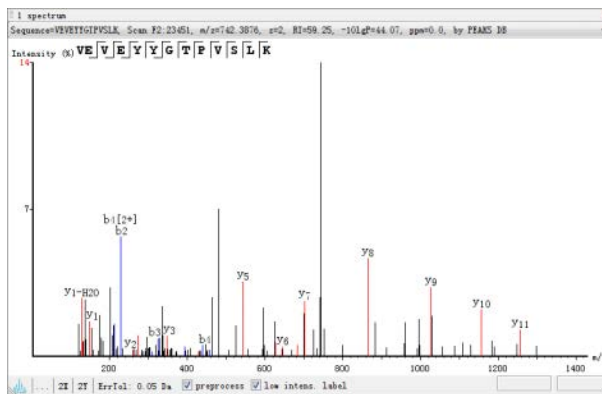

gi | 731395998

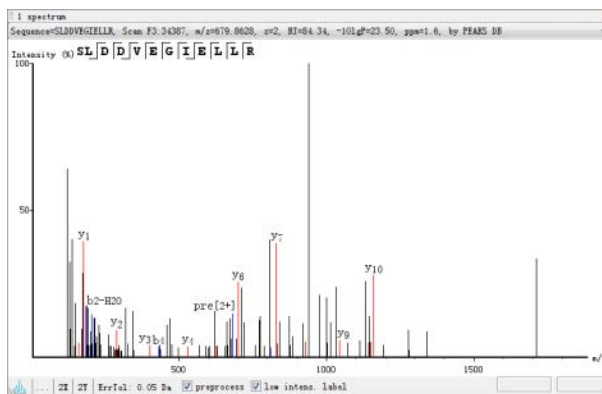

gi | 731396358

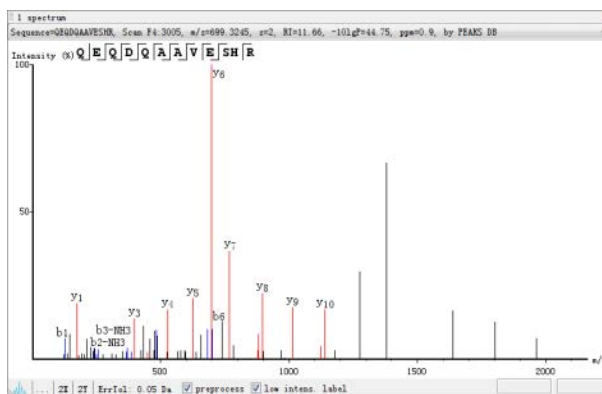

gi | 731398376

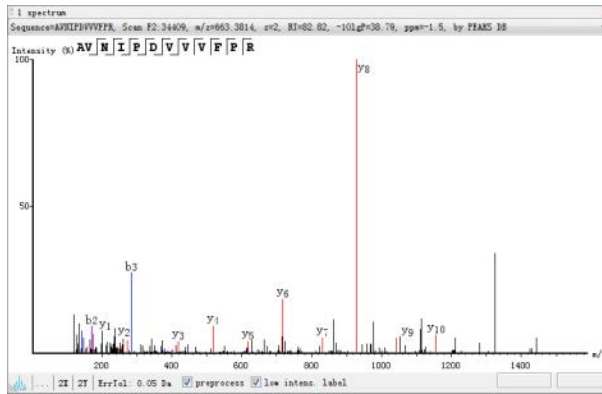

gi | 731399255

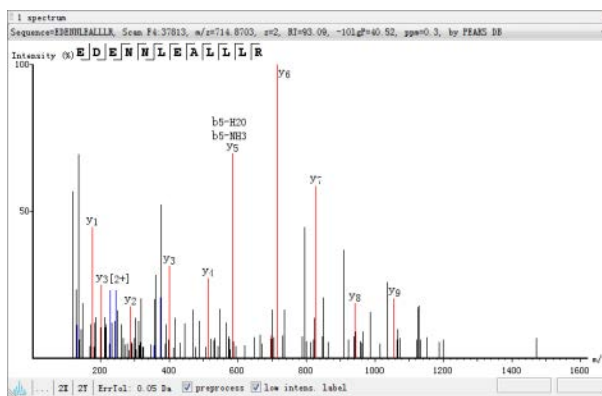

gi | 731400181

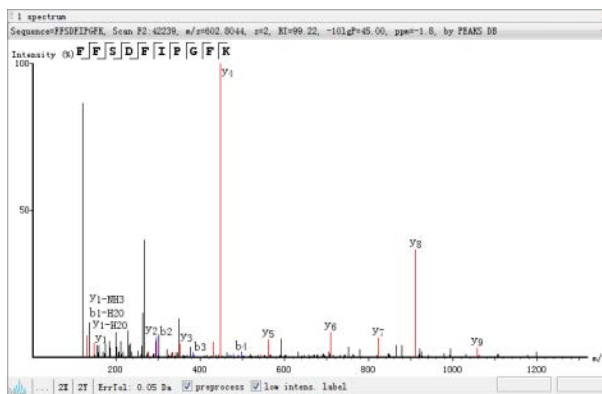

gi | 731400729

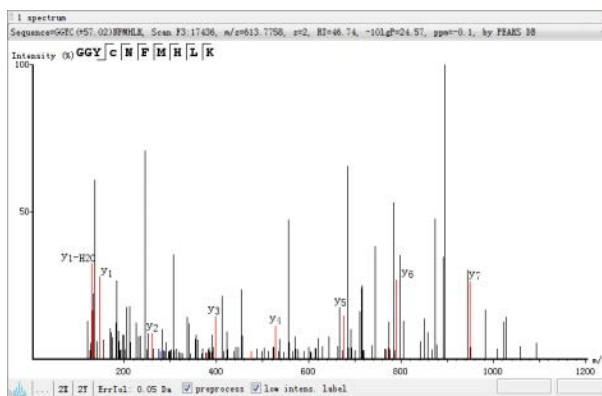

gi | 731402564

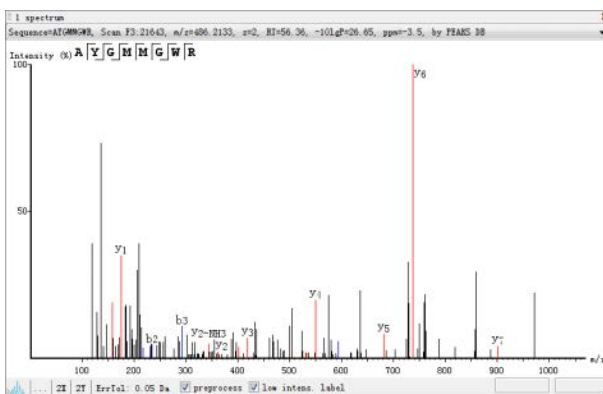

gi | 731403923

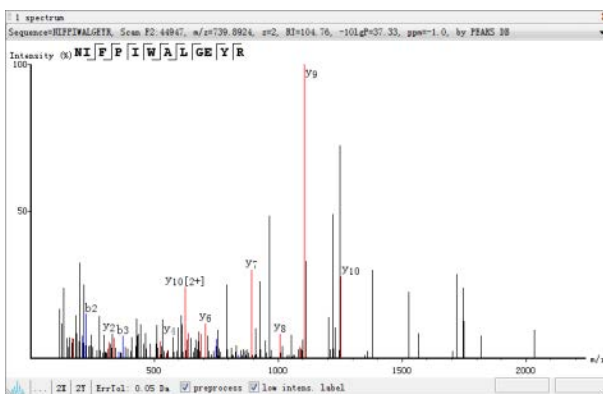

gi | 731405196

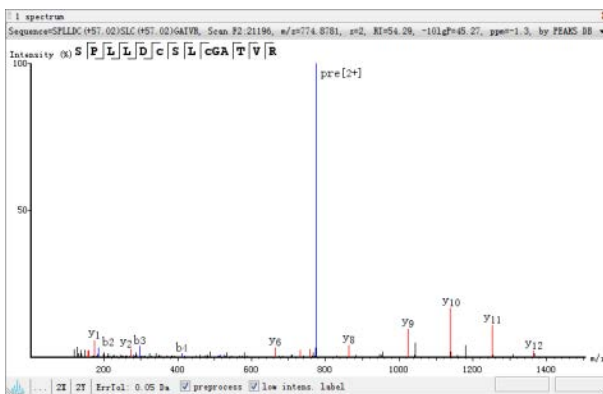

gi | 731405420

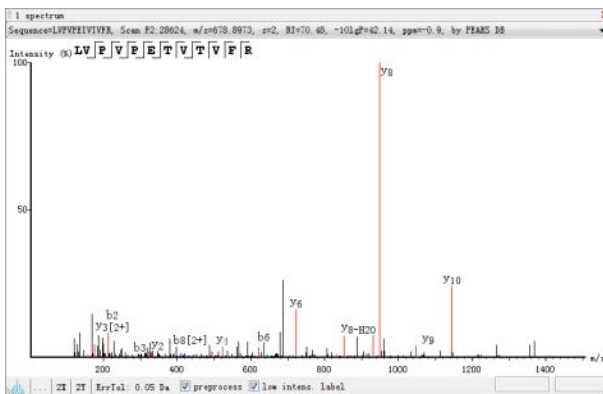

gi | 731408196

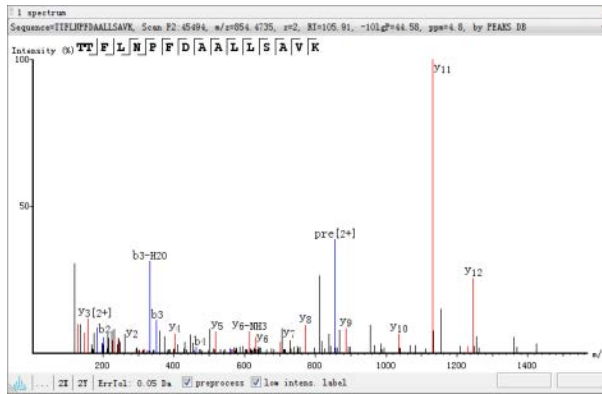

gi | 731410731

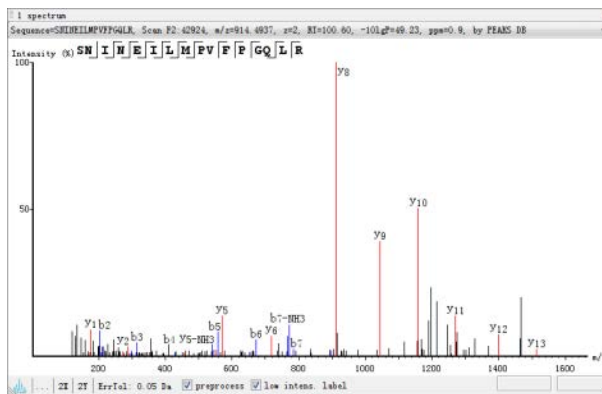

gi | 731412938

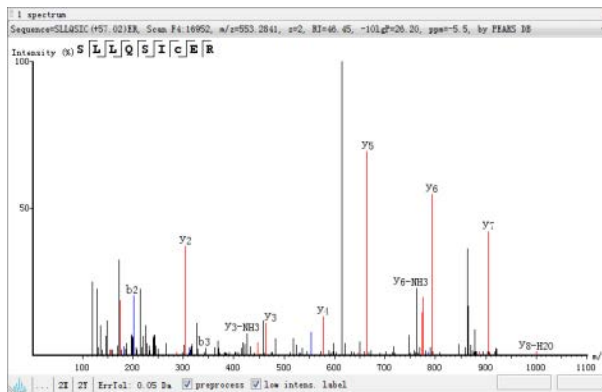

gi | 731420830

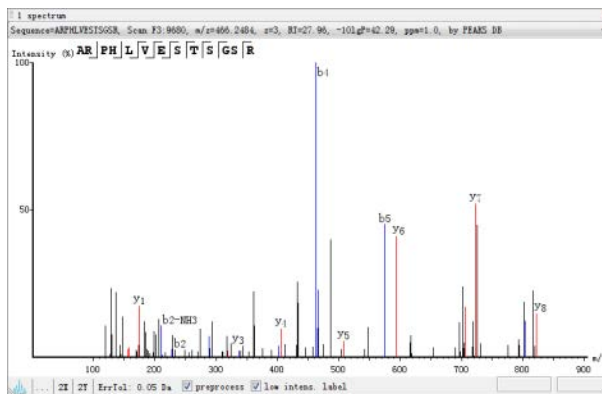

gi | 731422386

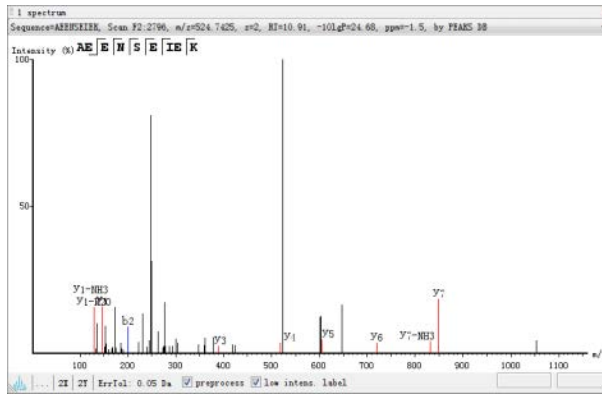

gi | 731422566

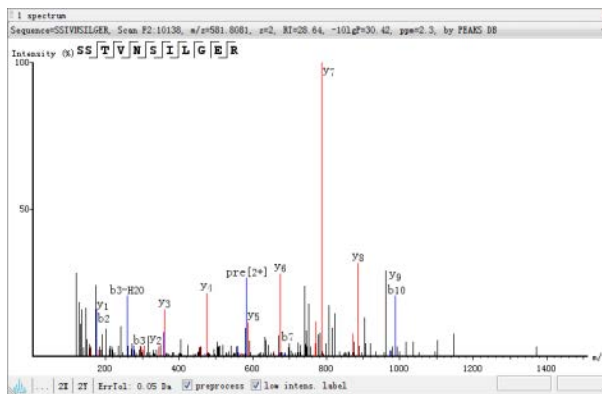

gi | 731424103

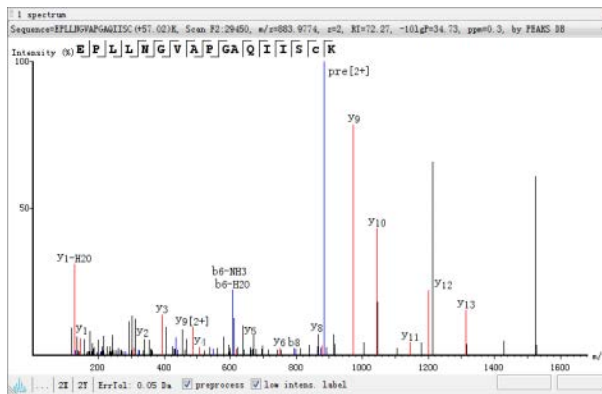

gi | 731425464

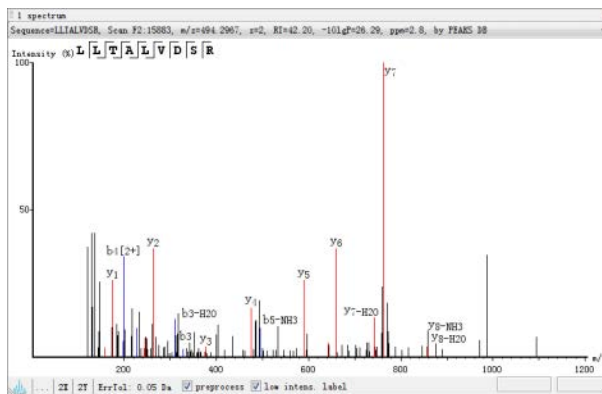

gi | 731427546

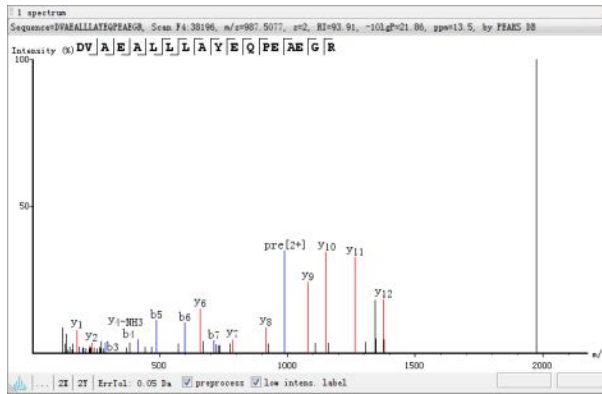

gi | 731428733

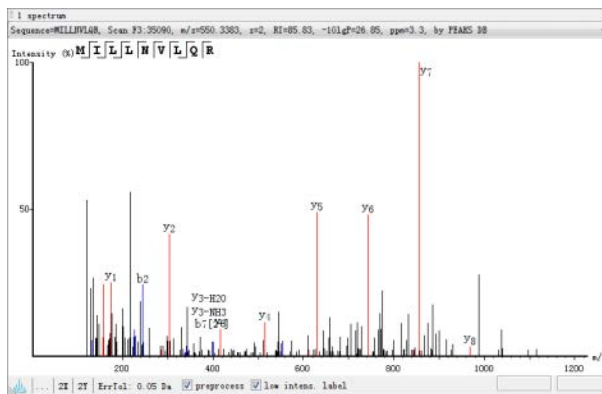

gi | 731433292

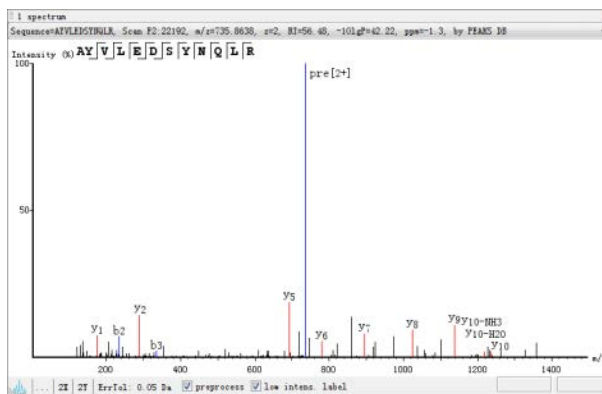

gi | 731435290

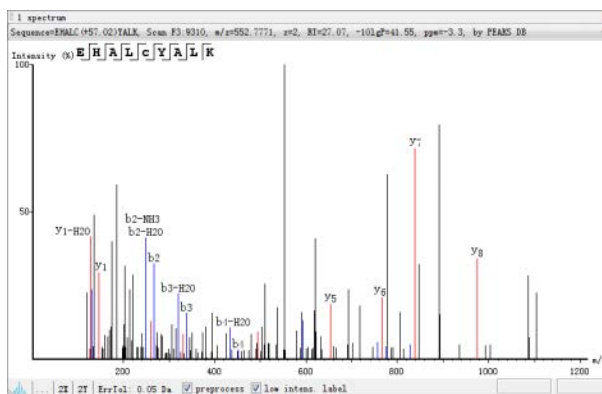



gi | 731436460

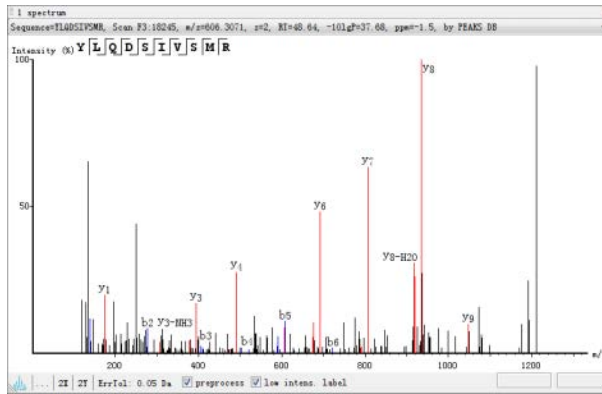

gi | 731436828

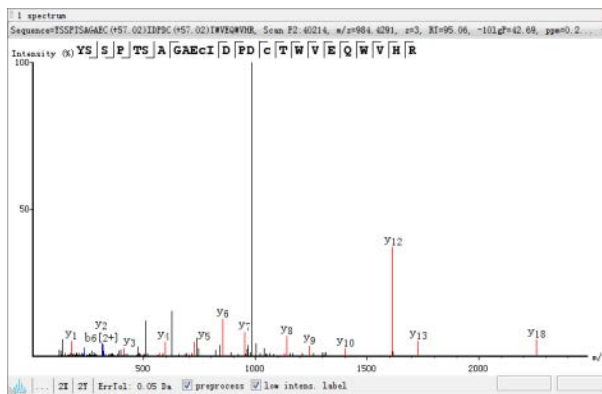

gi | 731437632

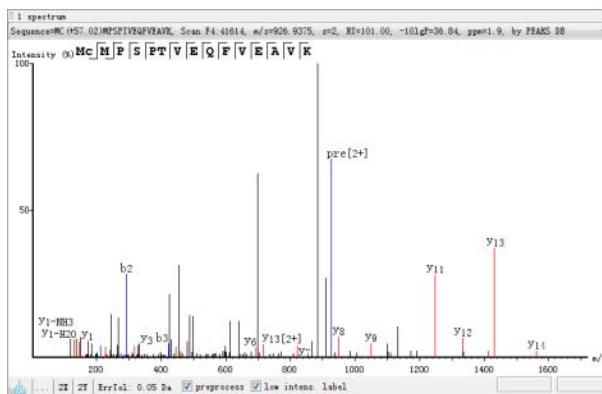

gi | 731438600

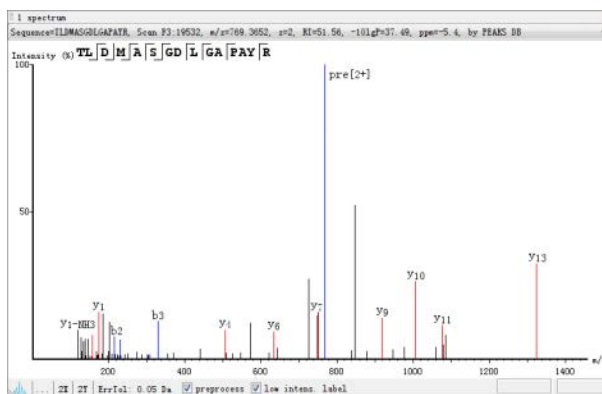

gi | 731439030

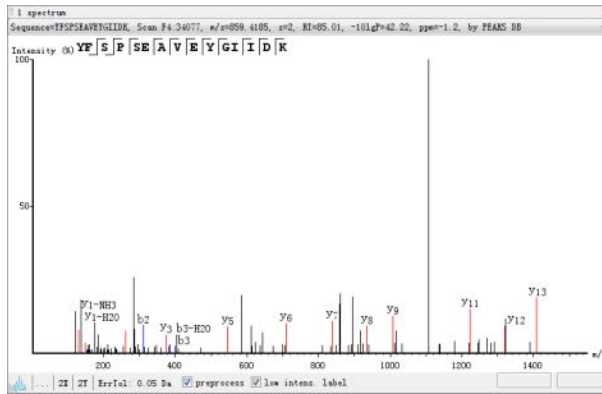

gi | 731439963

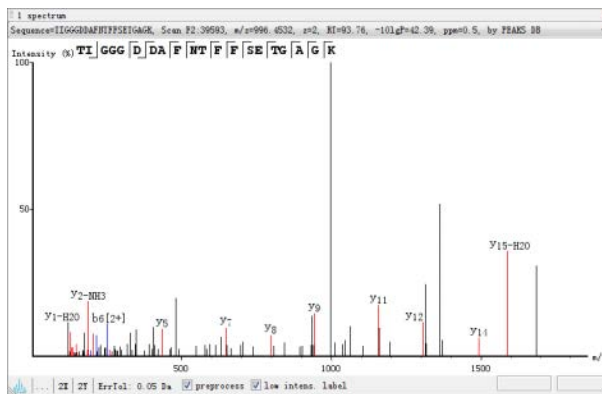

gi | 731440022

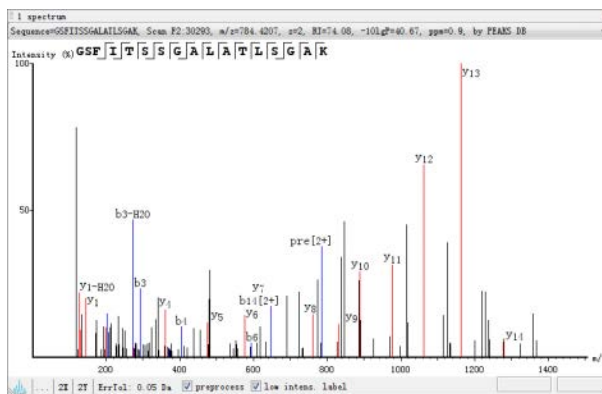

Fig.S3 The spectra of the proteins identified by one unique peptide with only one spectrum in CK2. Upper is the accession of protein, and under is its corresponding spectrum.

gi | 225464589

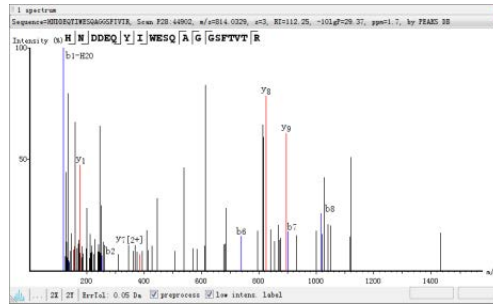

gi | 225434984

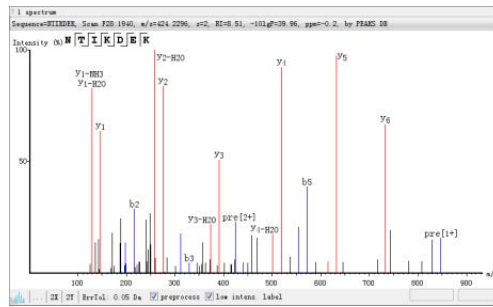

gi | 225456143

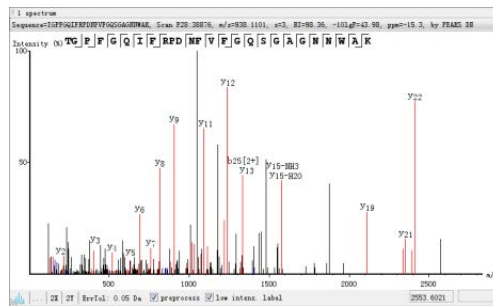

gi | 225426414

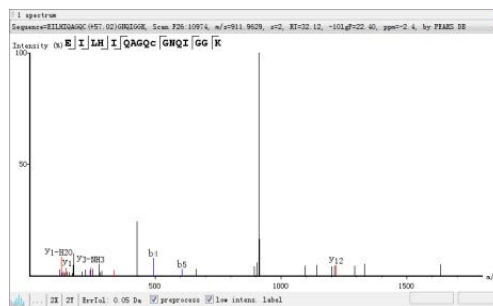

gi | 224144808

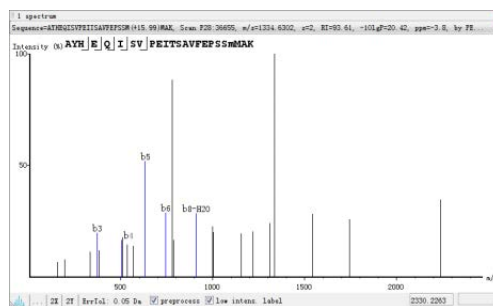

gi | 731416007

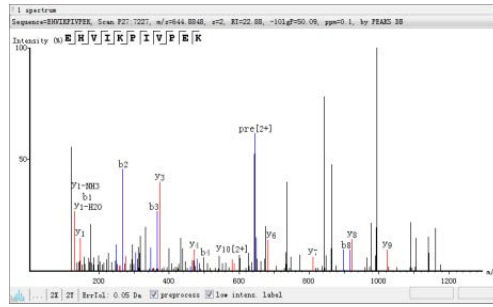

gi | 731407424

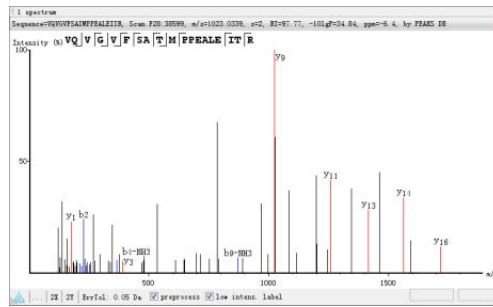

gi | 566187902

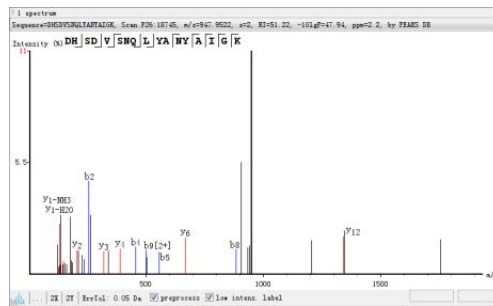

gi | 566162272

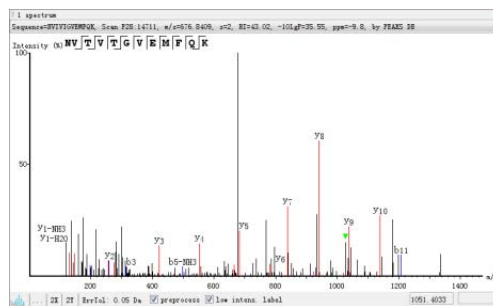

gi | 566198898

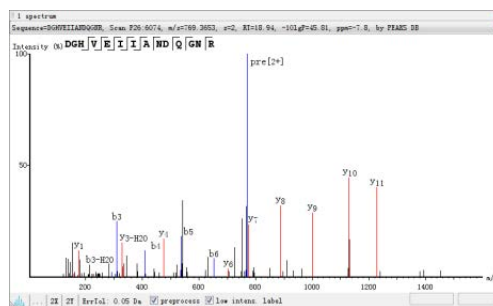

gi | 731402352

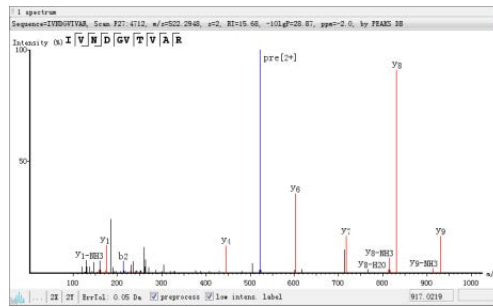

gi | 225440011

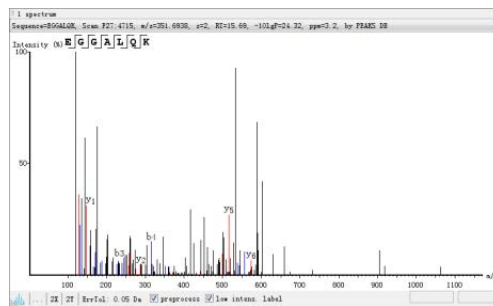

gi | 566173508

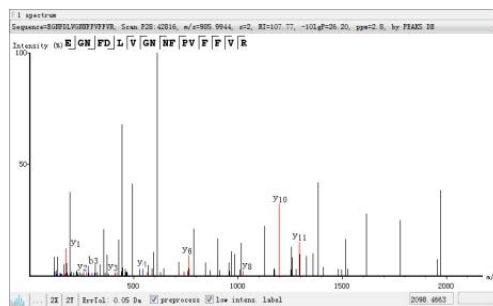

gi | 566190996

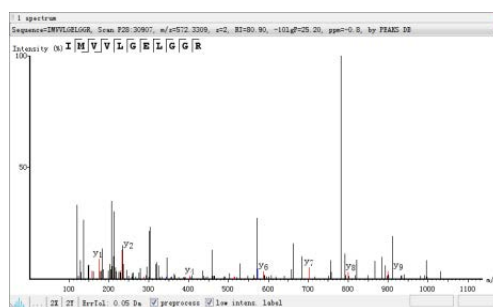

gi | 526117711

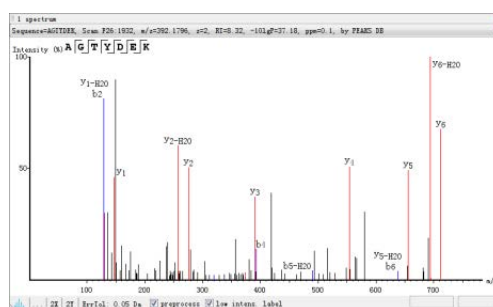

gi | 566170698

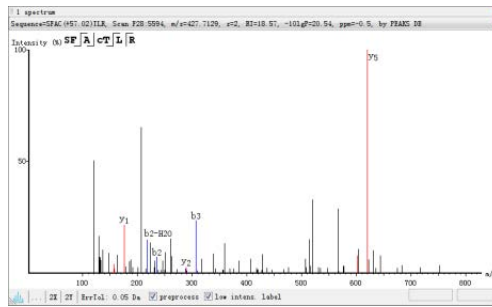

gi | 224365636

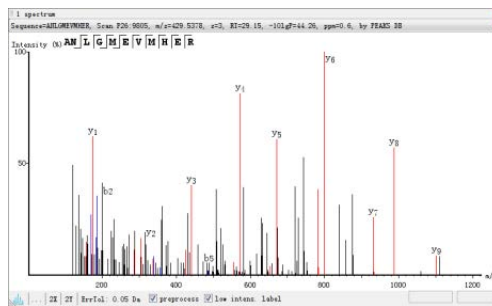

gi | 566214954

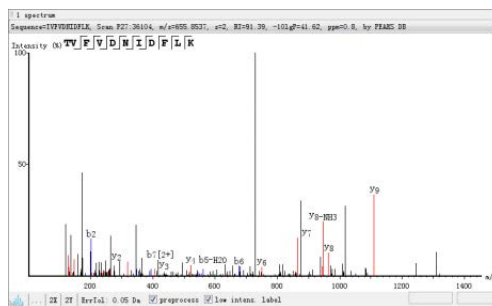

gi | 225426063

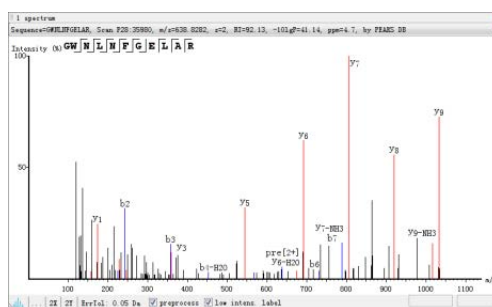

gi | 566160536

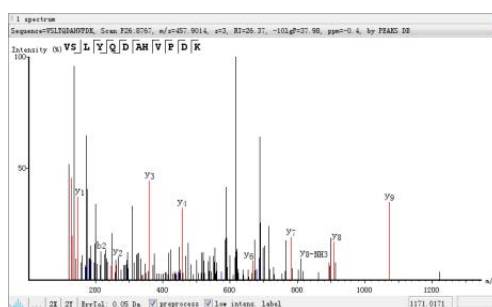

gi | 225430650

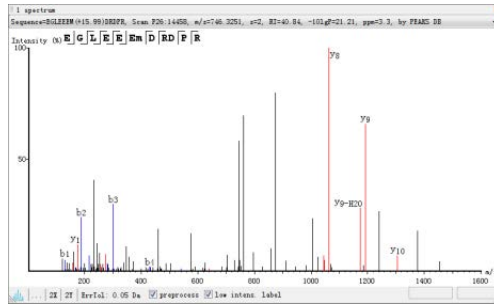

gi | 224054542

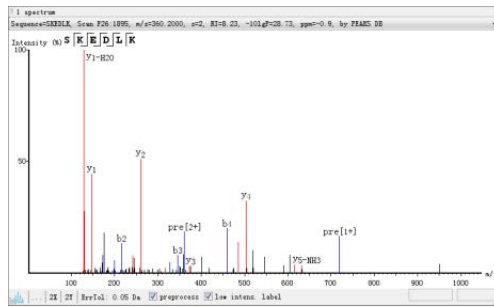

gi | 225425166

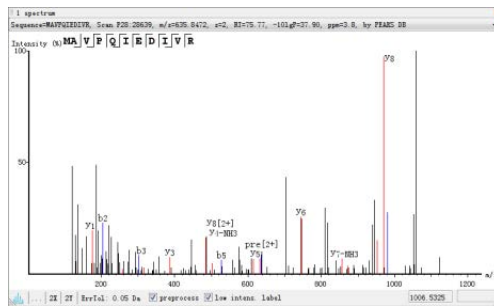

gi | 224063273

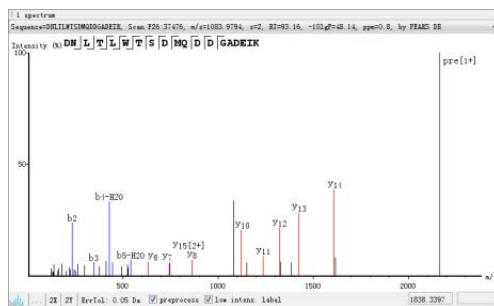

gi | 225428247

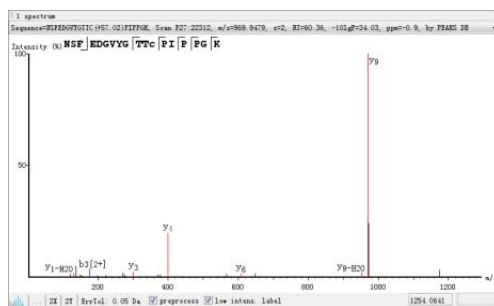

gi | 224108774

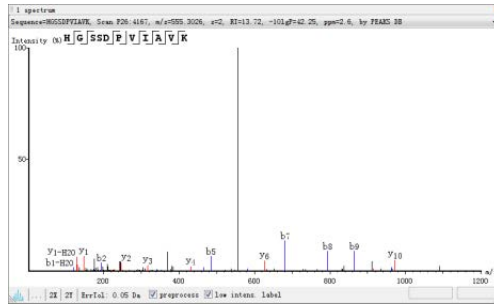

gi | 731392629

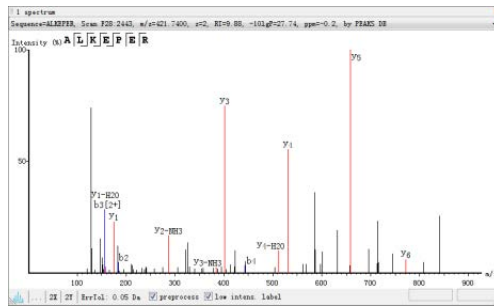

gi | 225454009

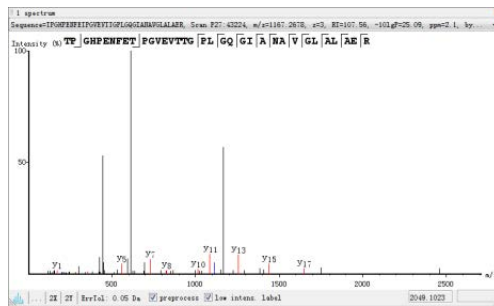

gi | 225441044

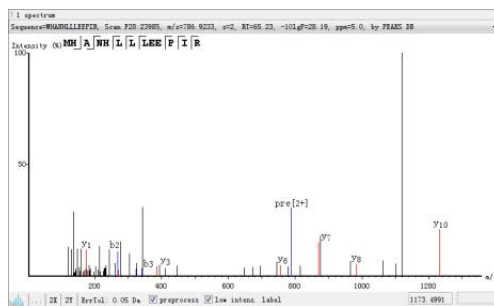

gi | 225436900

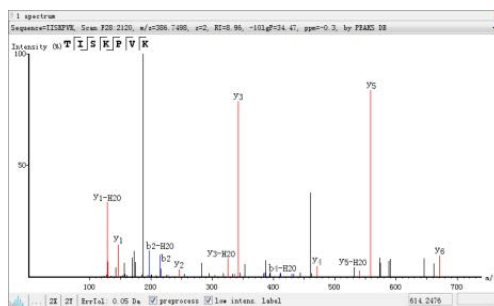



gi | 731412938

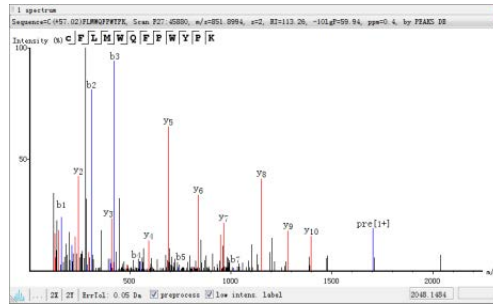

gi | 225430366

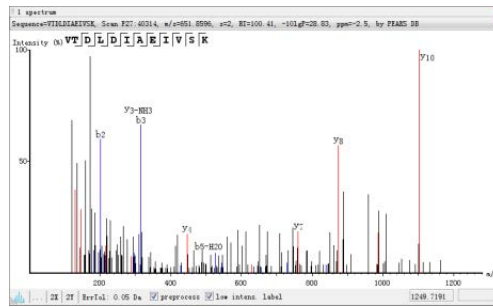

gi | 224127346

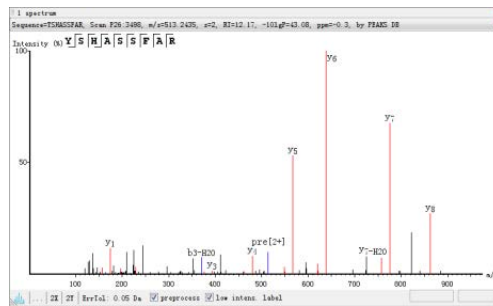

gi | 731399856

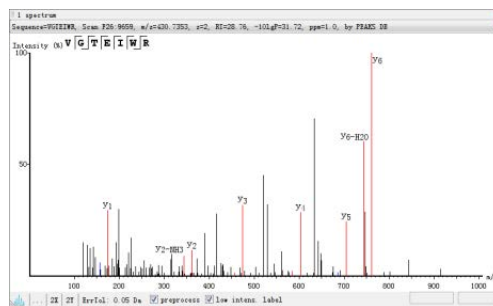

gi | 225432758

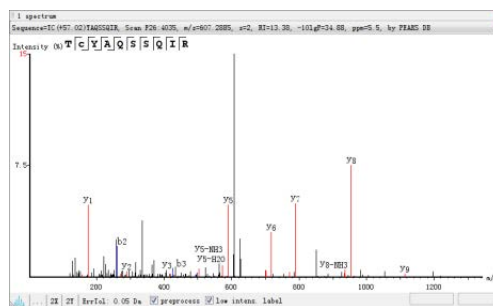

gi | 224091827

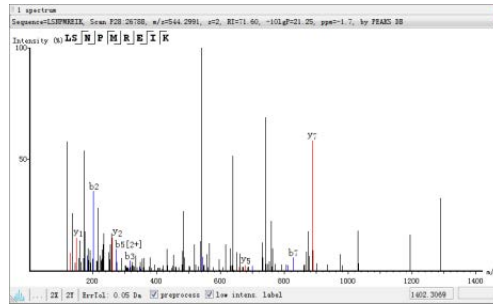

gi | 566191895

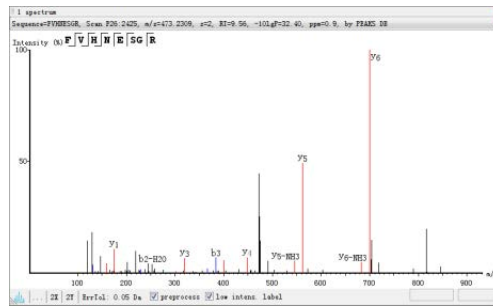

gi | 566167161

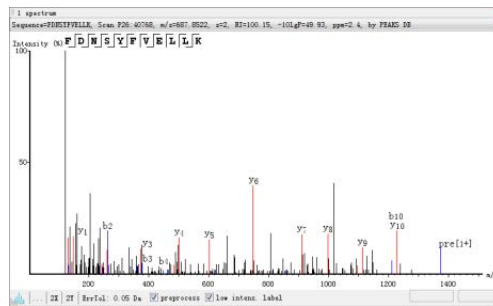

gi | 224066545

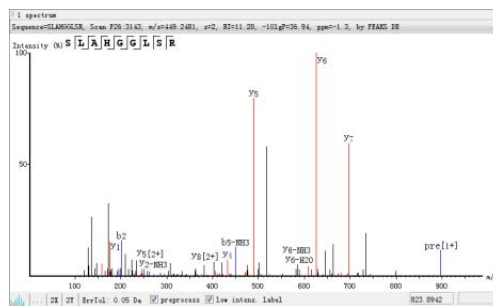

gi | 225423722

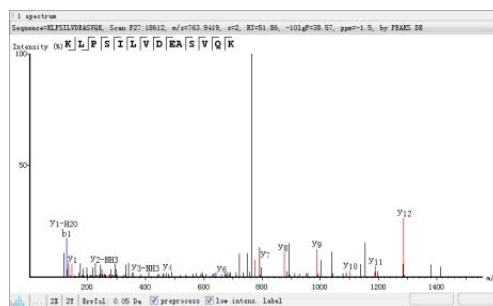

gi | 225445206

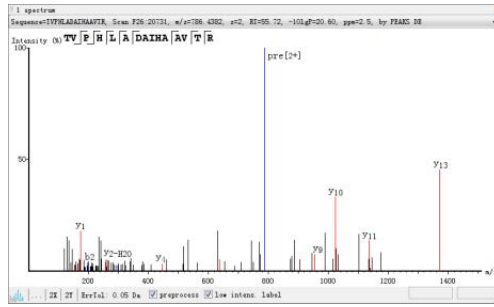

gi | 225450549

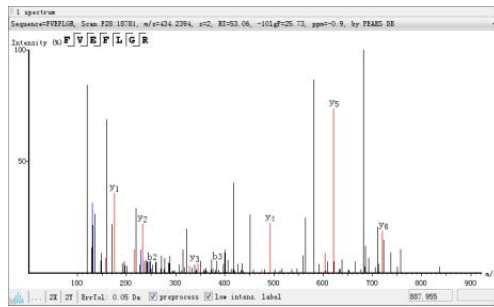

gi | 224119200

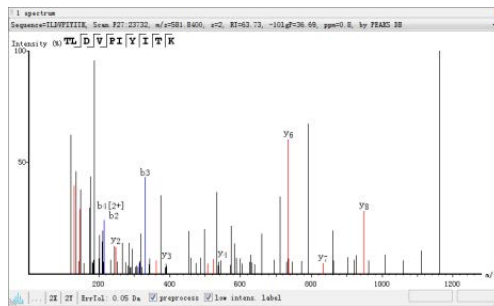

gi | 731401620

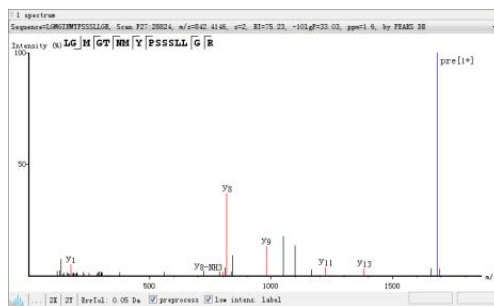

gi | 224075445

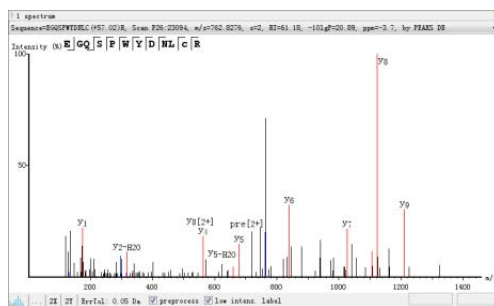

gi | 566168414

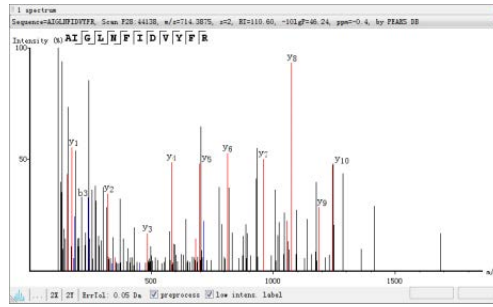

gi | 225443272

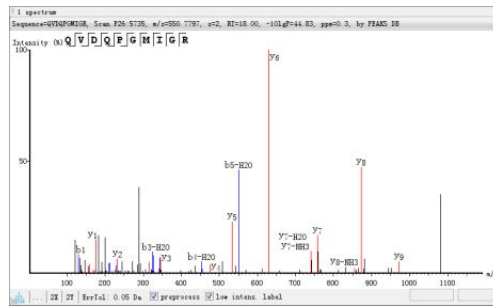

gi | 225447723

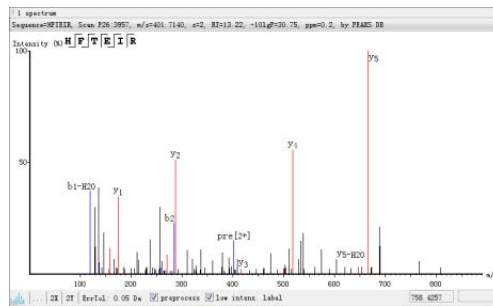

gi | 566200975

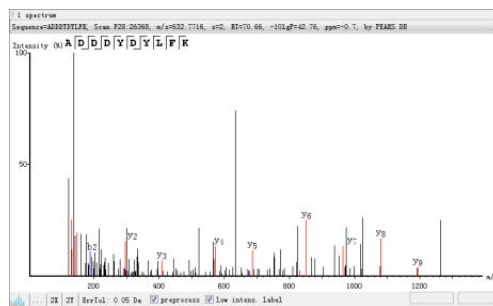

gi | 566259512

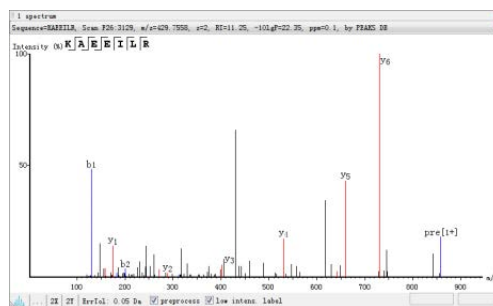

gi | 224078584

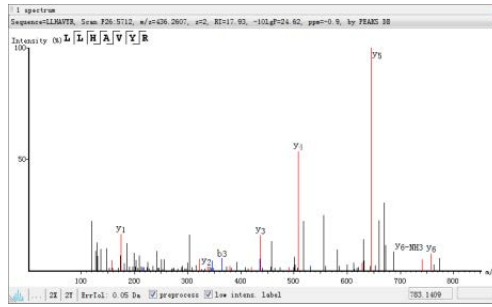

gi | 224100535

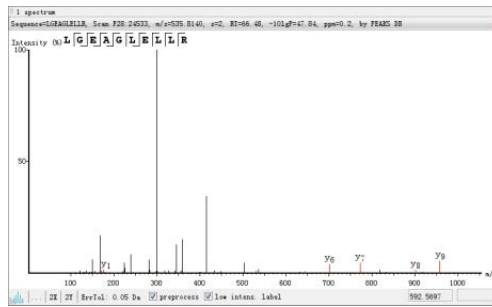

gi | 731392621

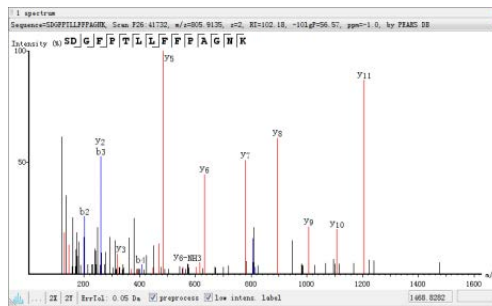

gi | 566213642

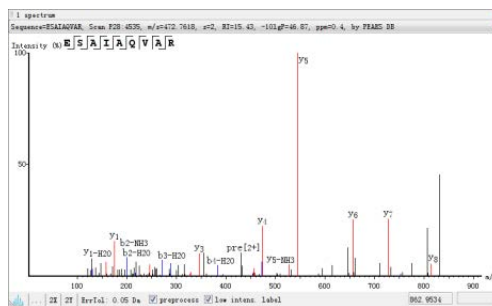

gi | 566166593

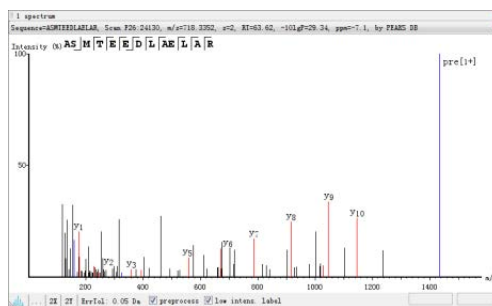



gi | 566156965

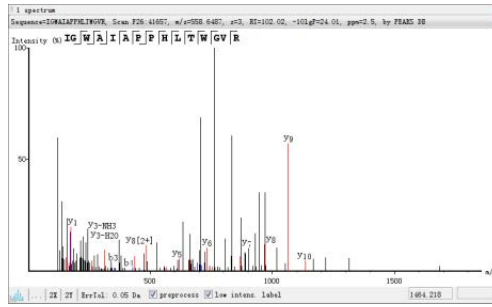

gi | 731423236

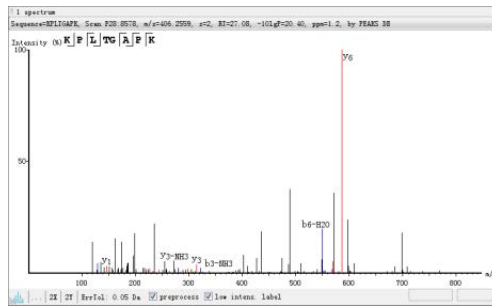

gi | 731408416

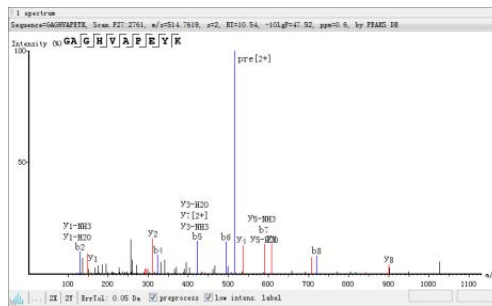

gi | 224086367

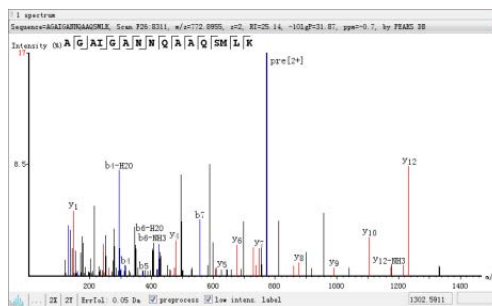

gi | 566146801

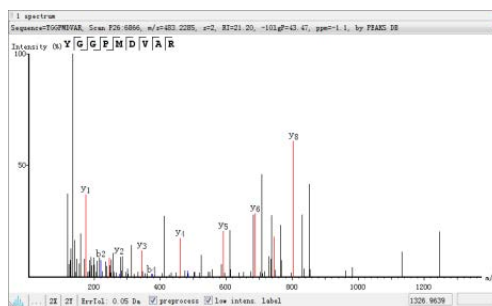

gi | 225440230

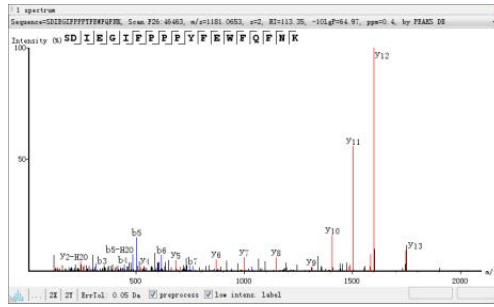

gi | 566202791

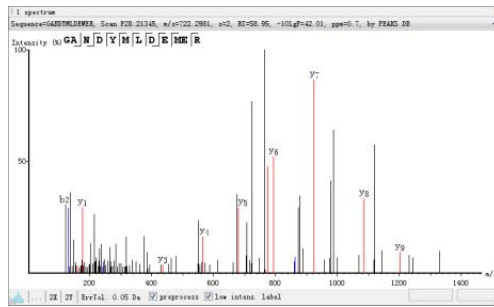

gi | 225428043

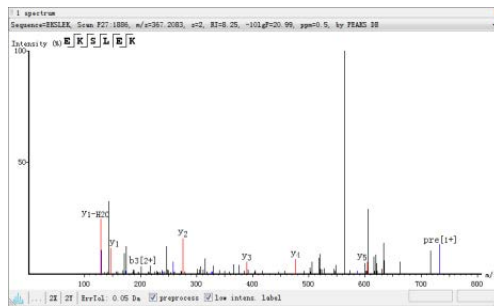

gi | 224099811

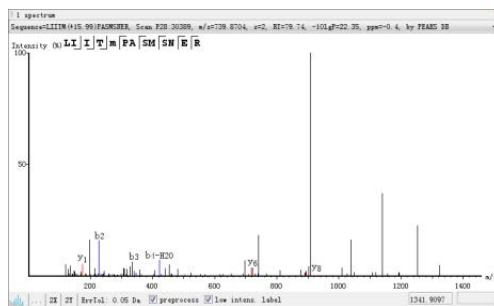

gi | 566200149

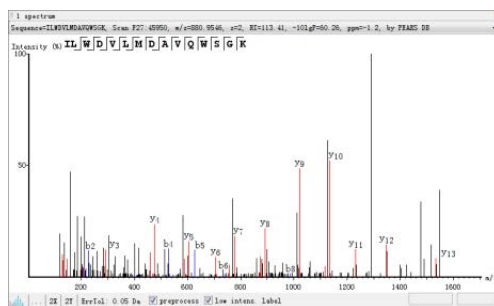



gi | 566245088

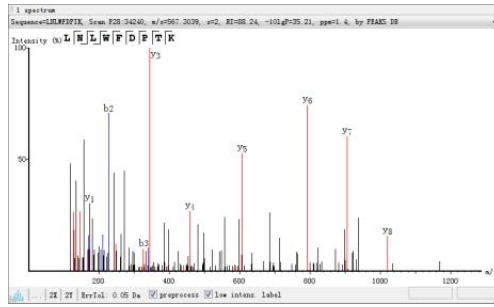

gi | 566171321

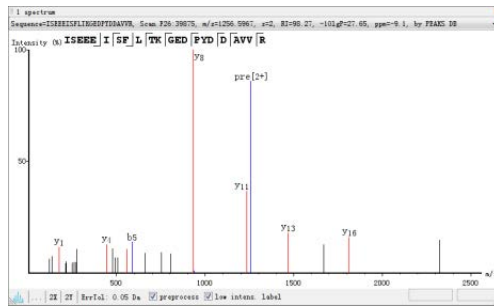

gi | 225434195

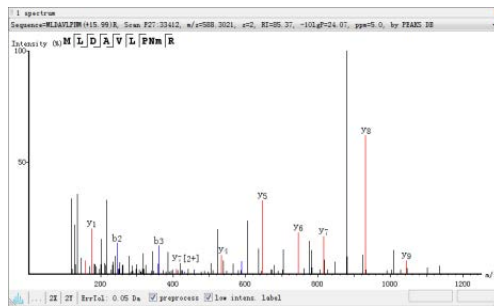

gi | 359478417

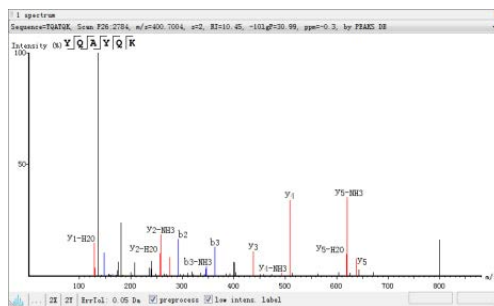

gi | 731393292

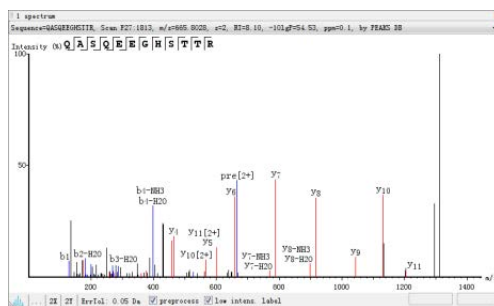



gi | 566161702

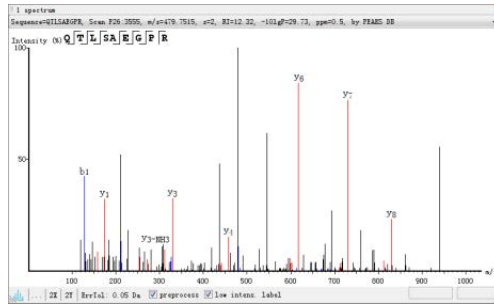

gi | 731412260

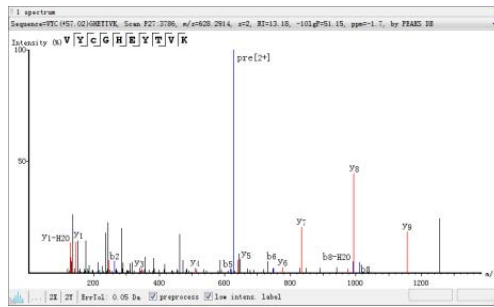

gi | 566195800

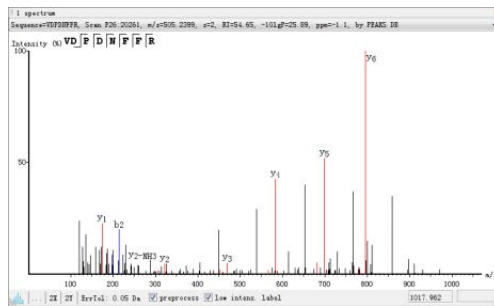

gi | 731438661

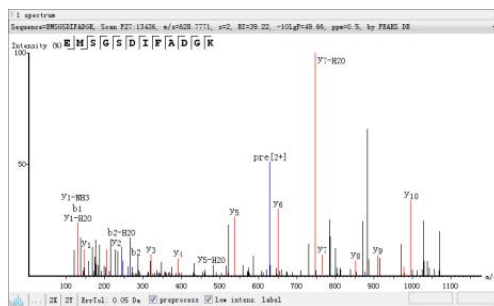

gi | 566179312

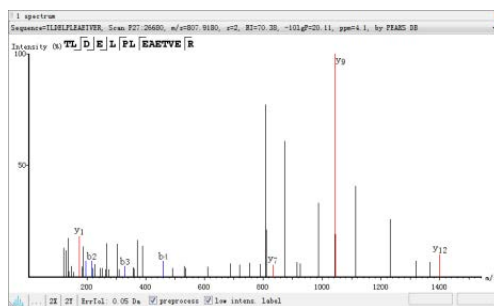

gi | 225426330

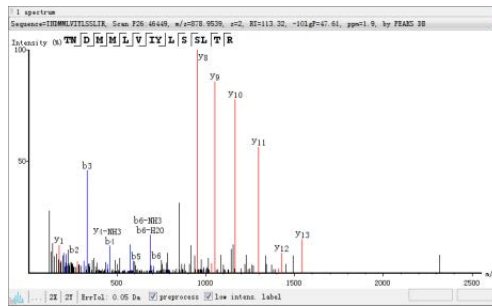

gi | 225461673

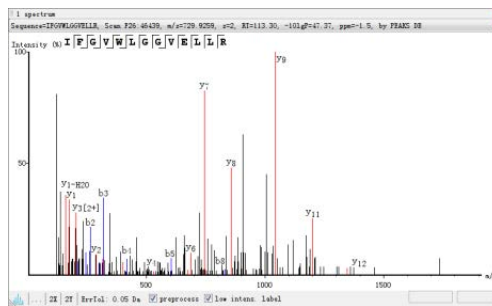

gi | 224103201

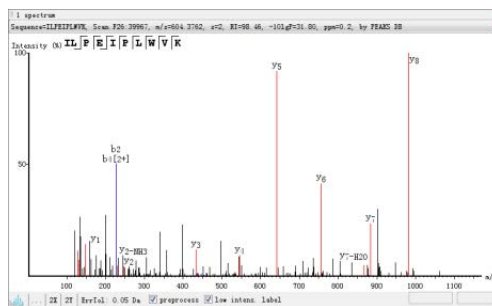

gi | 225450155

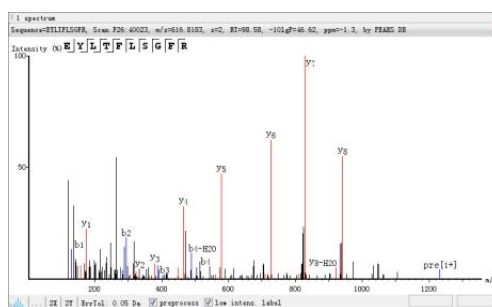

gi | 225457231

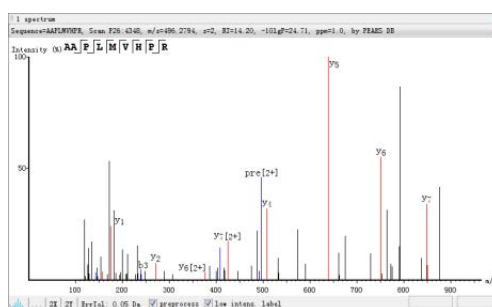

gi | 224097915

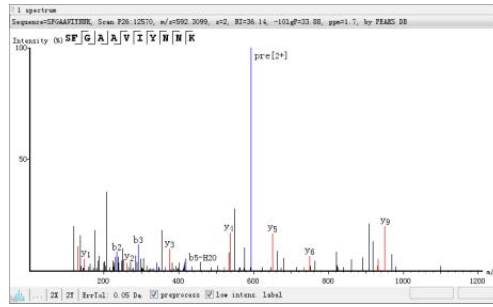

gi | 731408402

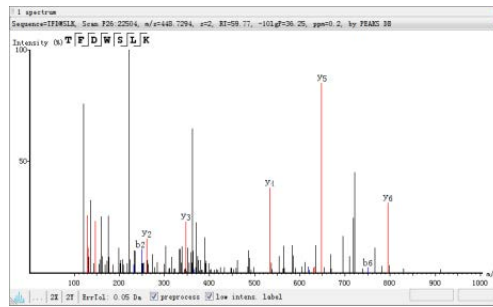

gi | 731387671

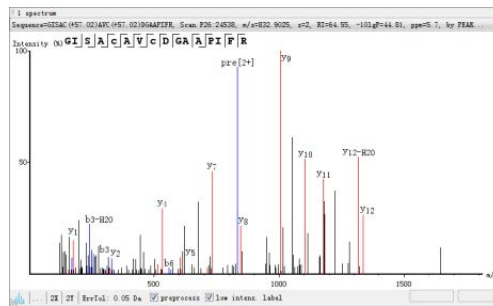

gi | 566187811

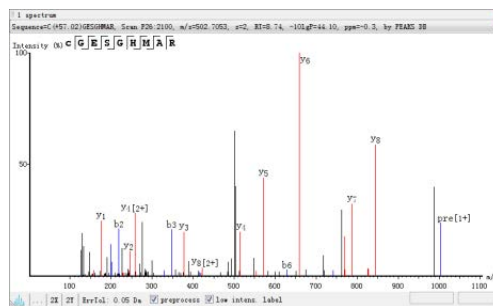

gi | 224091819

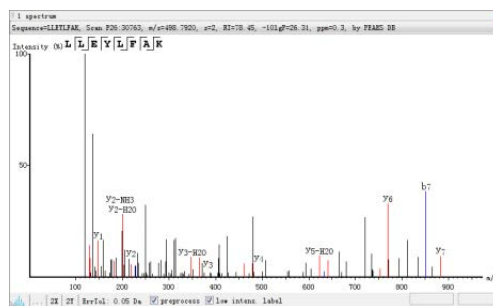

gi | 566214901

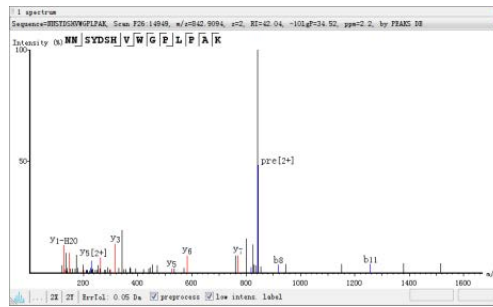

gi | 224067088

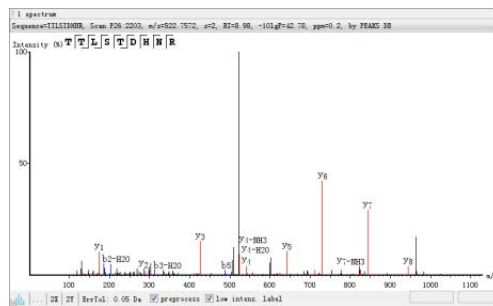

gi | 224102065

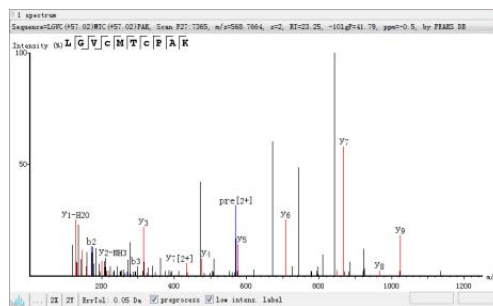

gi | 224104913

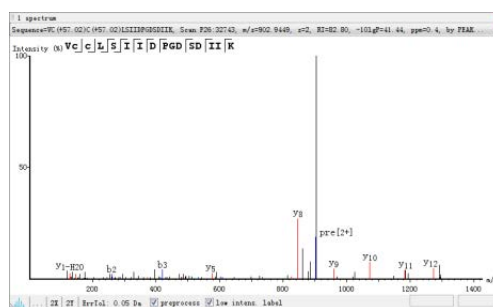

gi | 359483831

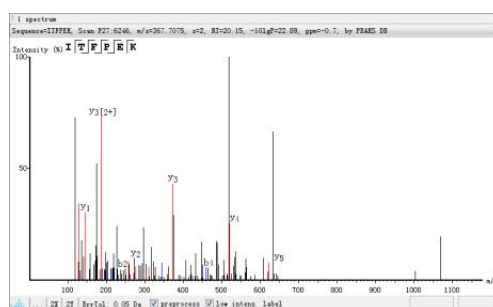

gi | 225425356

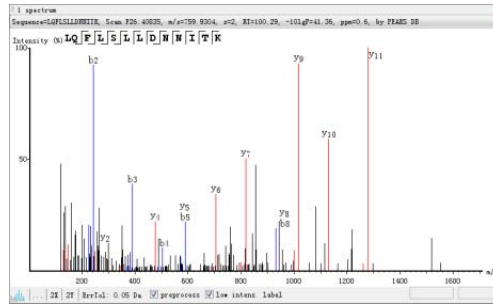

gi | 224117530

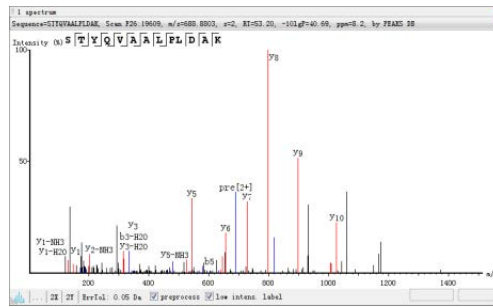

gi | 225428388

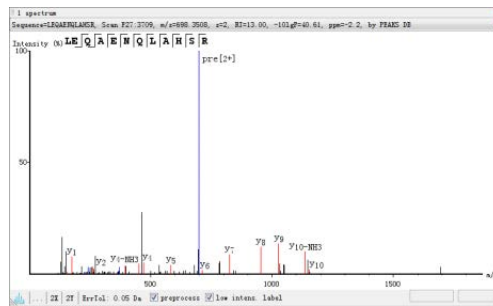

gi | 225452877

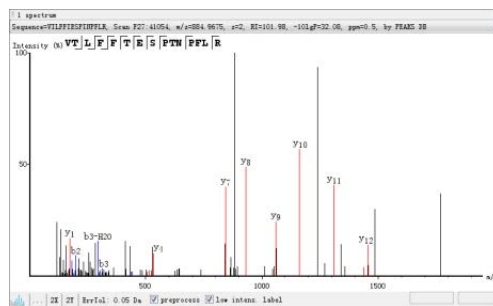

gi | 225452053

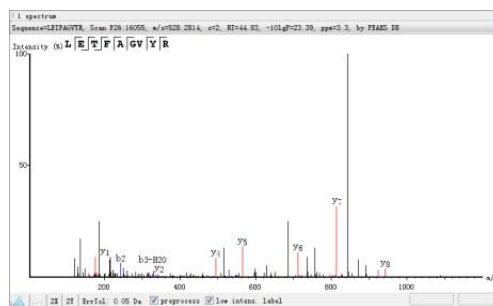

gi | 225442595

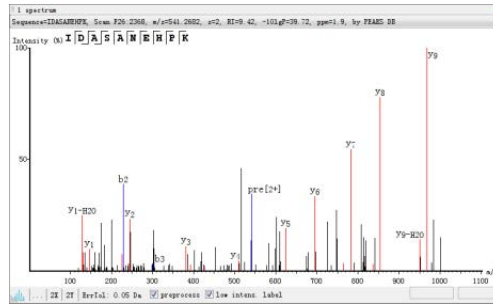

gi | 566197448

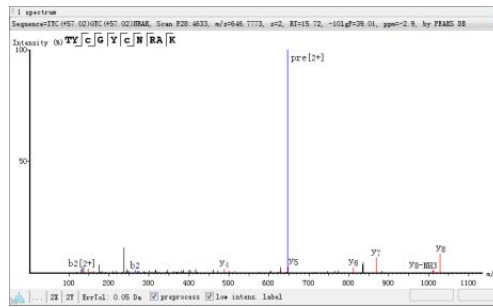

gi | 566210973

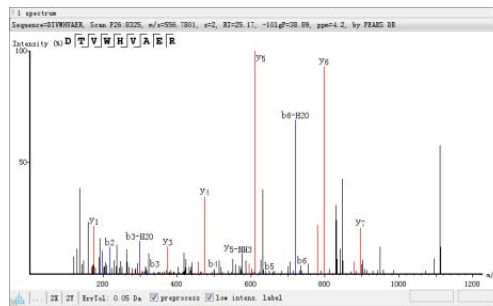

gi | 225444159

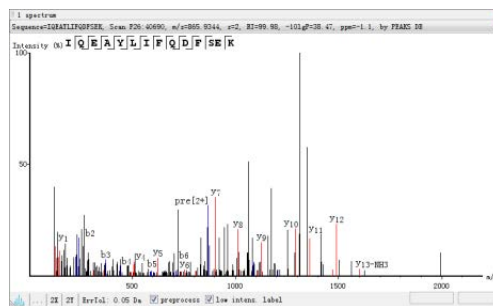

gi | 731371107

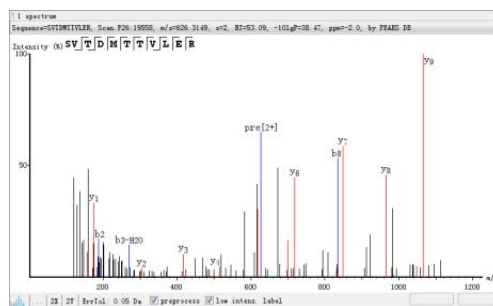



gi | 566164286

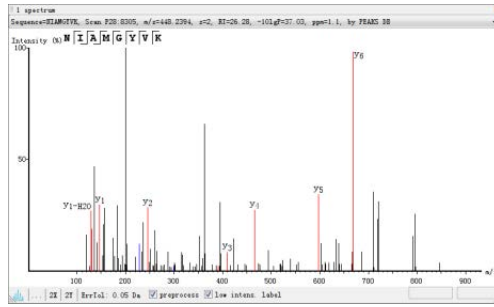

gi | 225423779

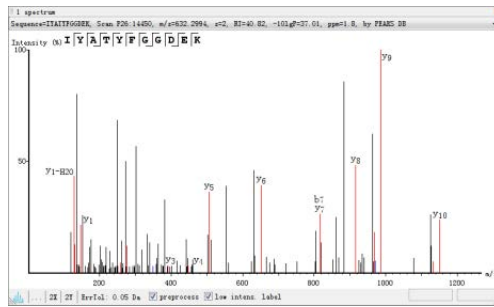

gi | 731416275

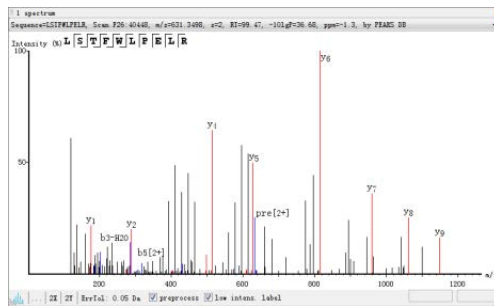

gi | 566150318

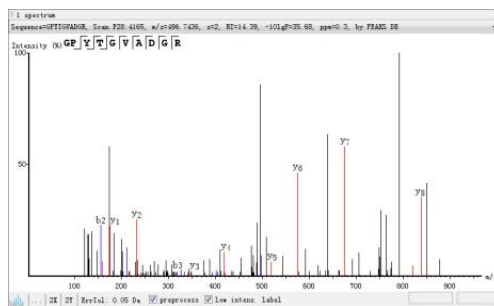

gi | 731427528

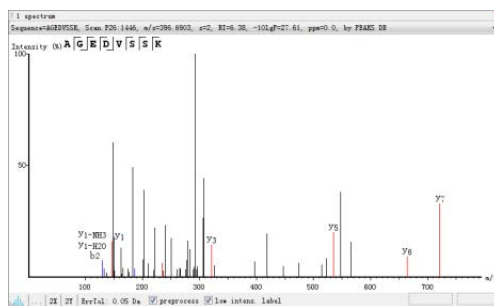

gi | 225439378

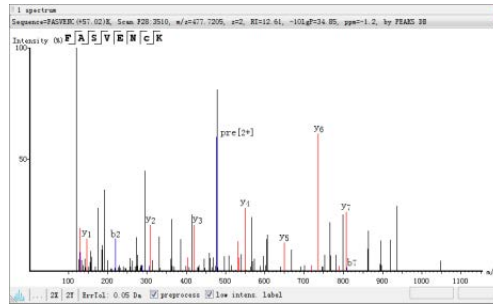

gi | 566181287

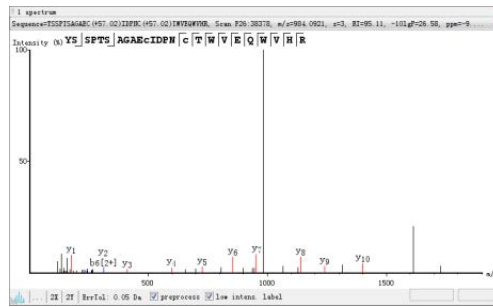

gi | 225441521

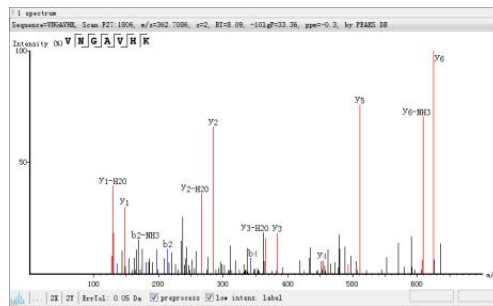

gi | 225442452

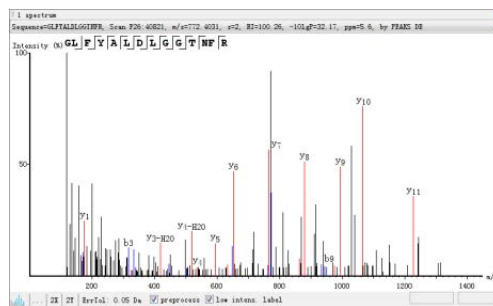

gi | 225427364

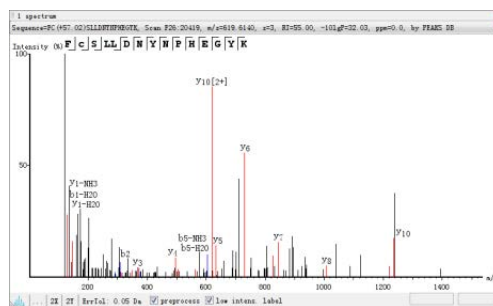

gi | 566195150

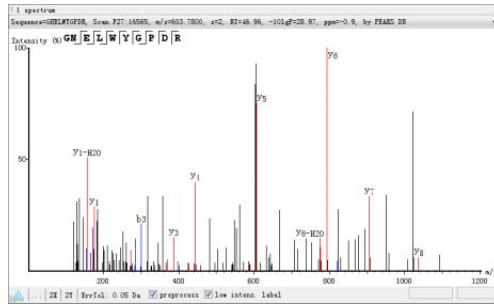

gi | 566187112

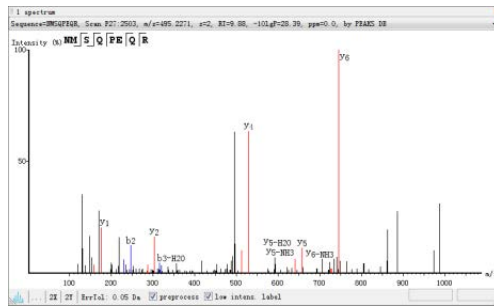

gi | 731422864

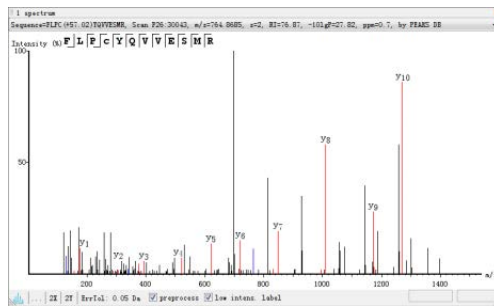

gi | 731427572

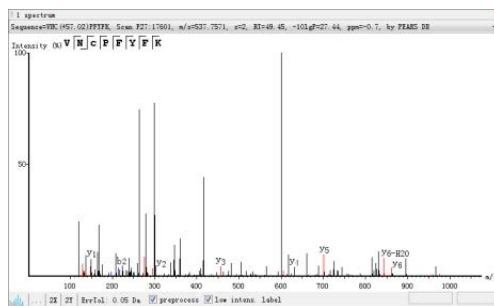

gi | 225433215

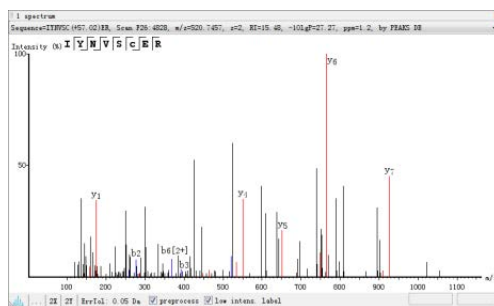

gi | 566170004

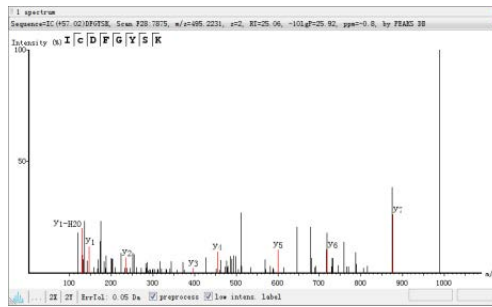

gi | 731420144

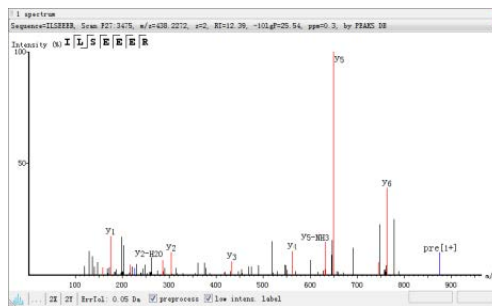

gi | 731406154

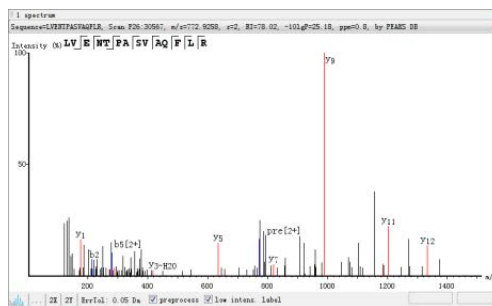

gi | 224063997

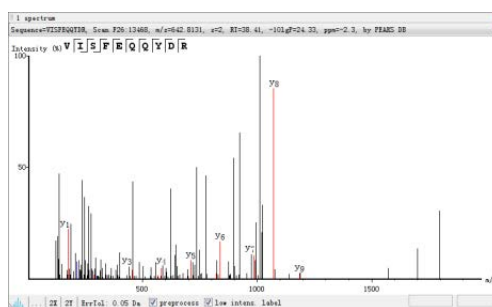

gi | 359493124

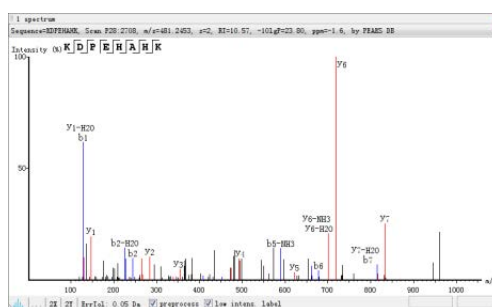

gi | 731420480

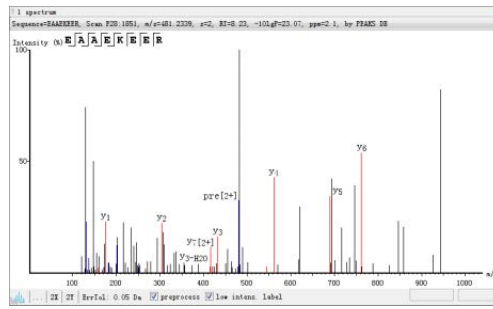

gi | 731426219

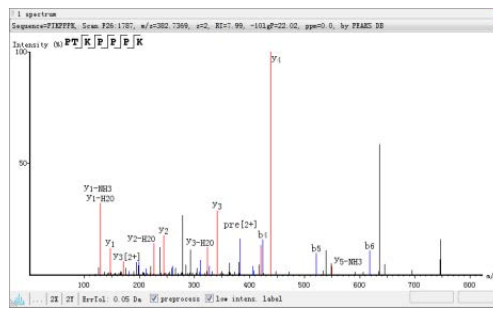

gi | 566149485

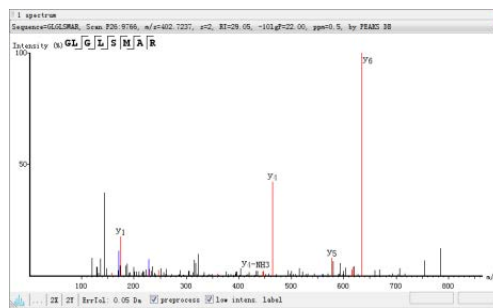

gi | 225431169

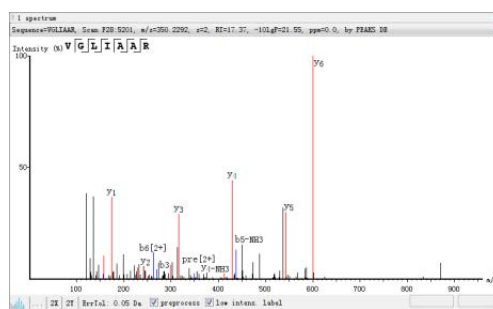

gi | 566167089

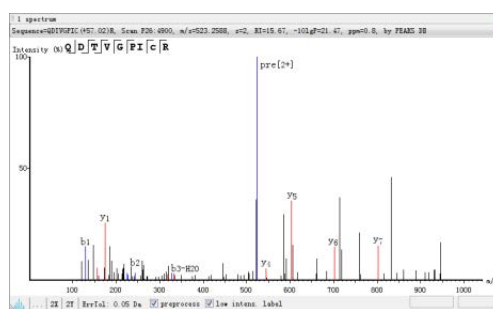

gi | 566168468

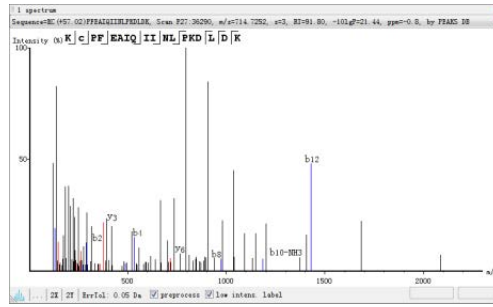

gi | 566163422

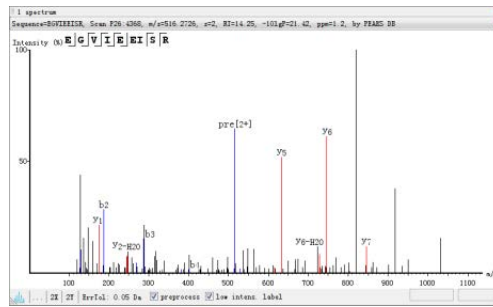

gi | 566184883

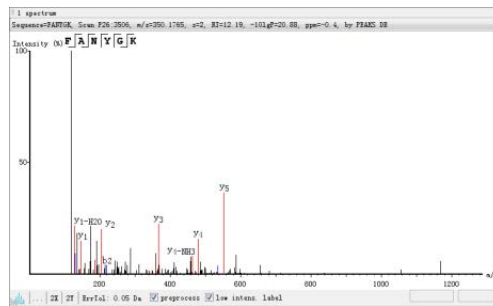

gi | 731386964

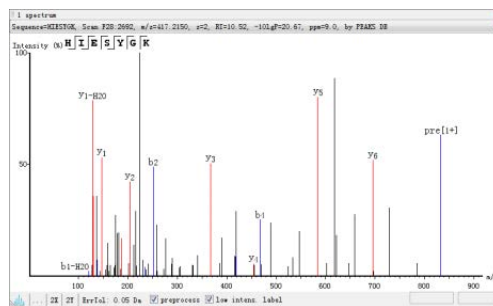

gi | 225462297

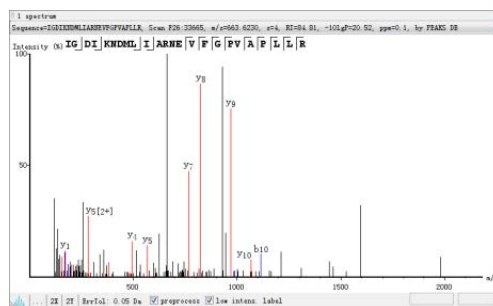

gi | 359484223

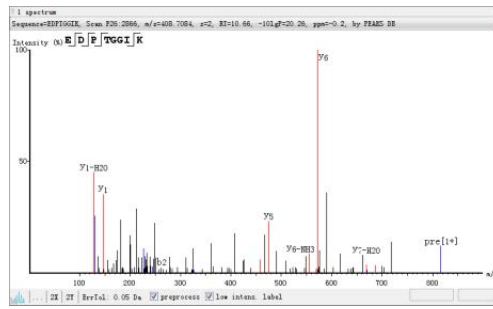

gi | 566188564

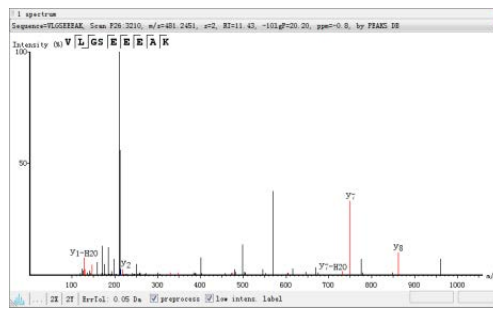

Fig.S4 The spectra of the proteins identified by one unique peptide with only one spectrum in HY1. Upper is the accession of protein, and under is its corresponding spectrum.

gi | 224112777

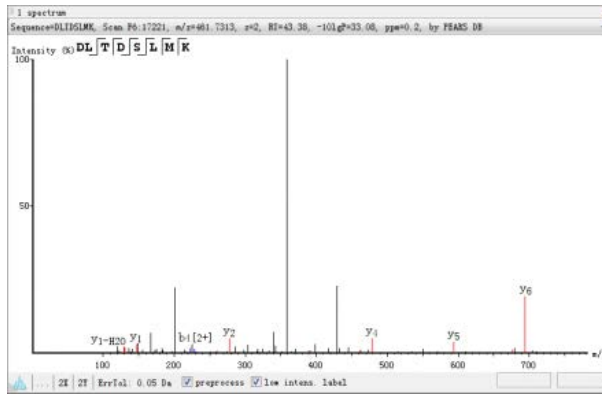

gi | 731416007

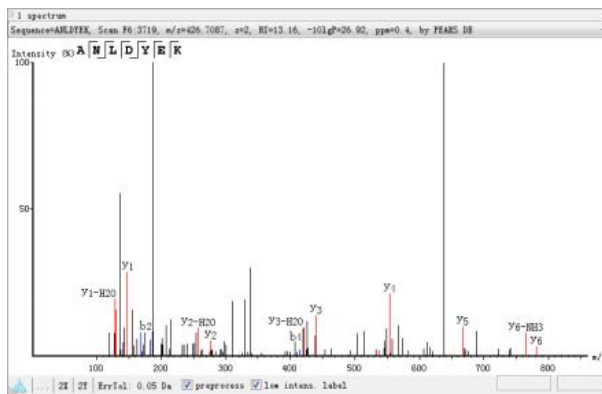

gi | 225426414

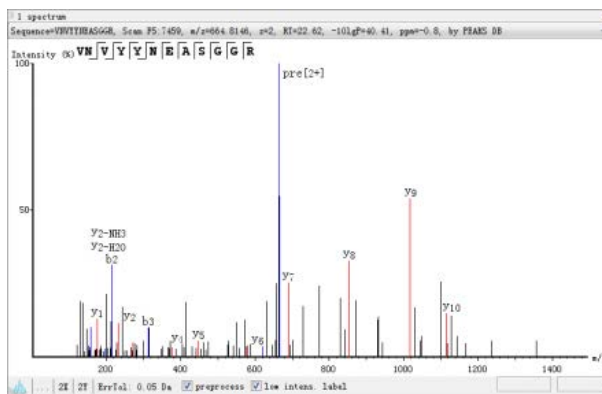

gi | 224052904

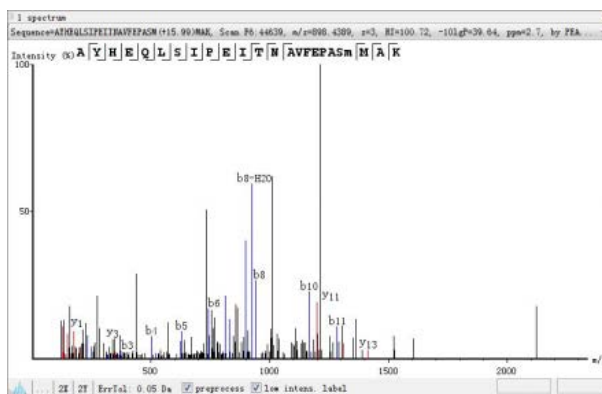



gi | 225437549

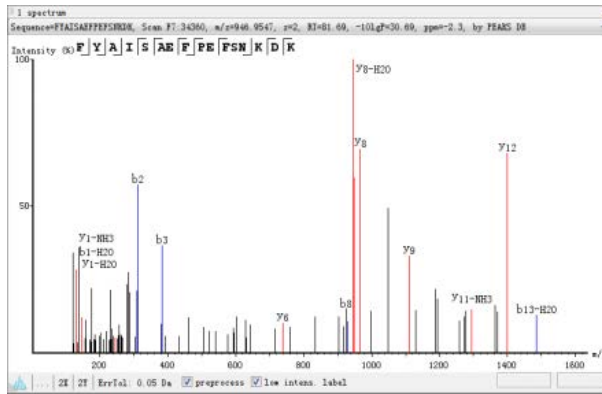

gi | 566206349

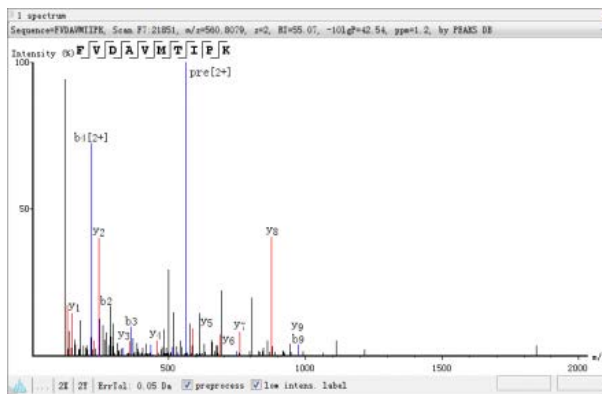

gi | 731407424

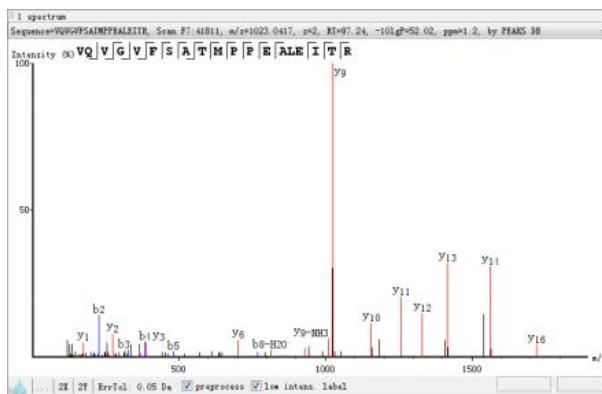

gi | 731427869

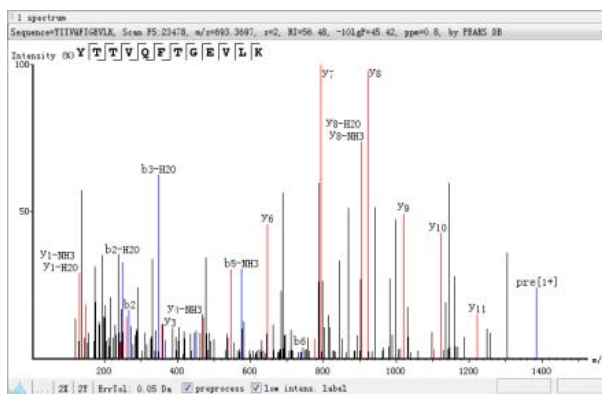

gi | 224097588

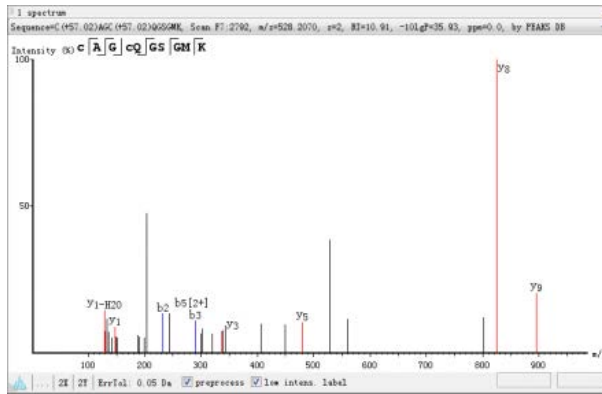

gi | 224136316

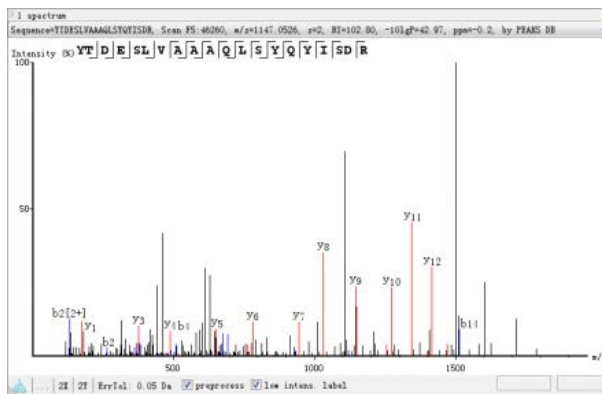

gi | 566170554

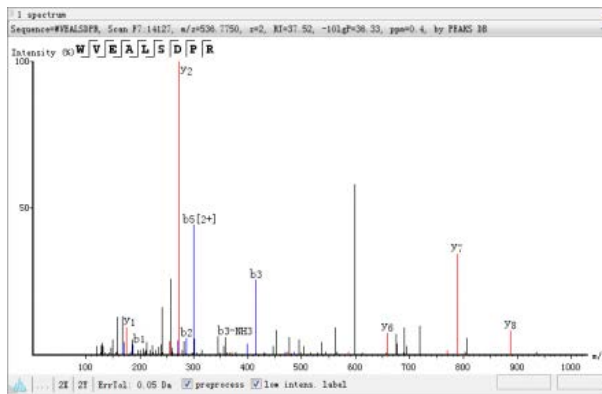

gi | 731418890

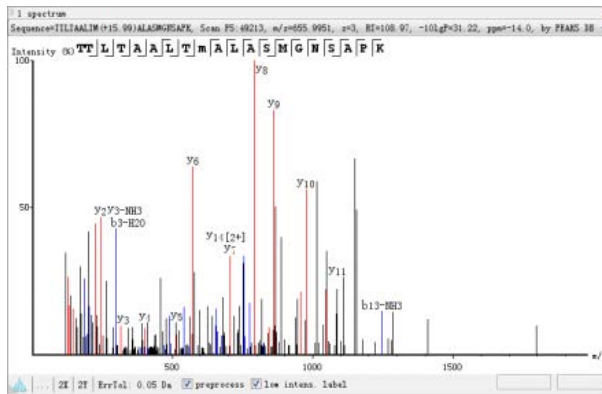

gi | 225442805

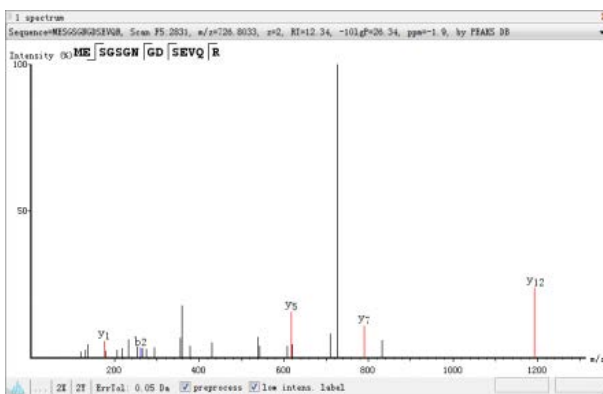

gi | 566148111

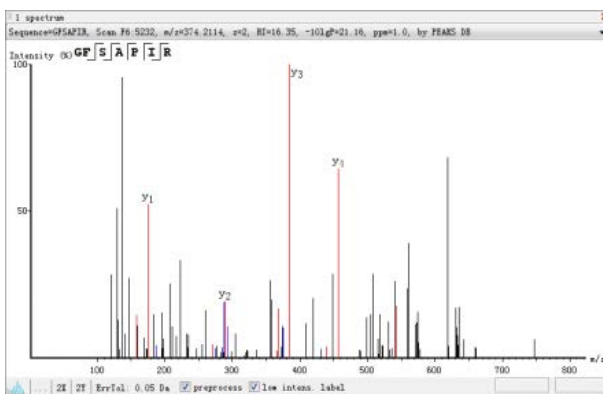

gi | 566205887

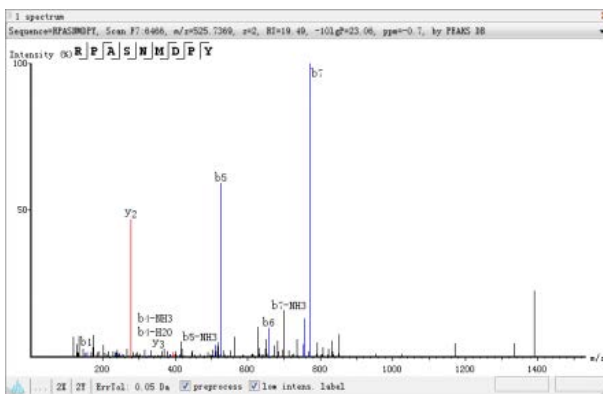

gi | 224069951

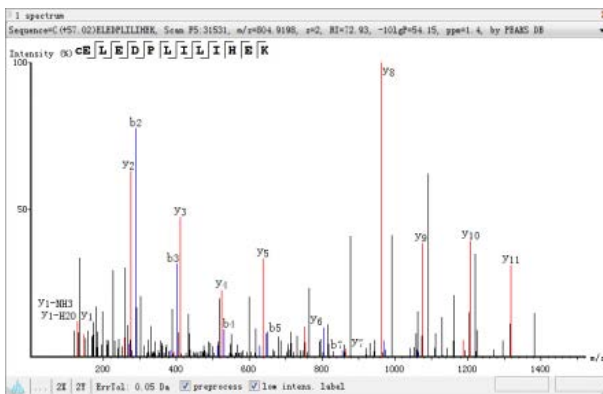

gi | 225434259

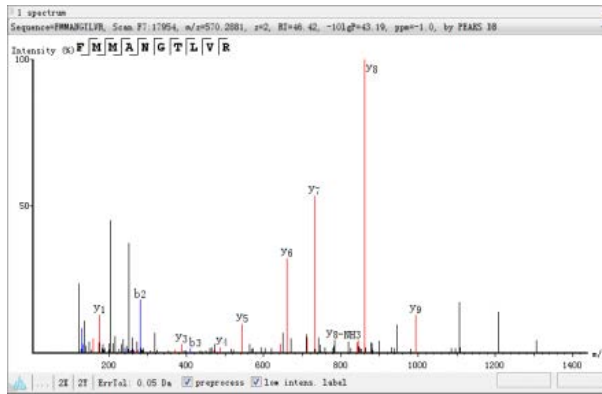

gi | 225451806

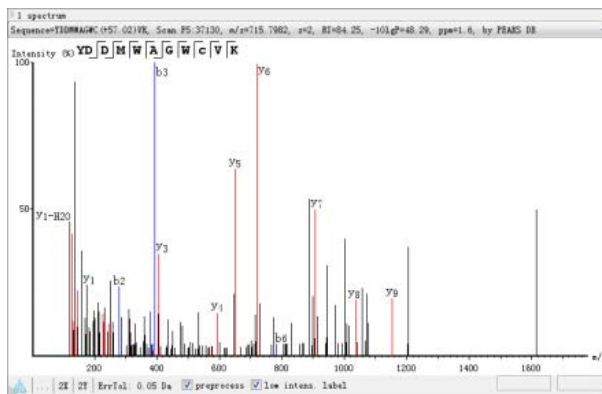

gi | 566157403

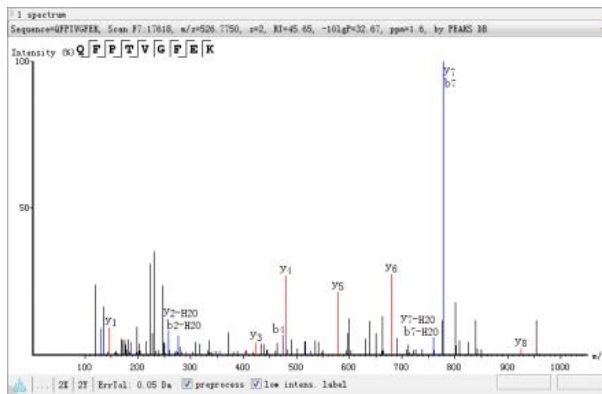

gi | 566157671

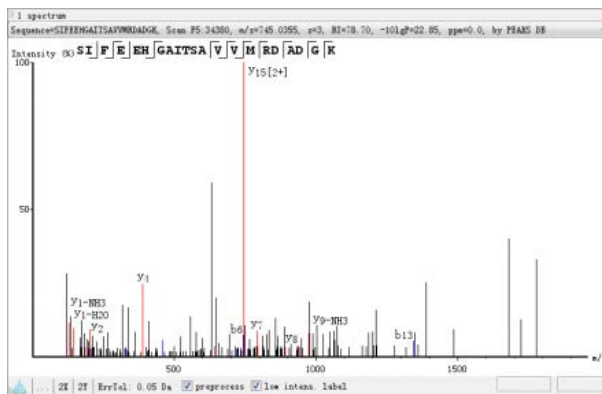



gi | 224109580

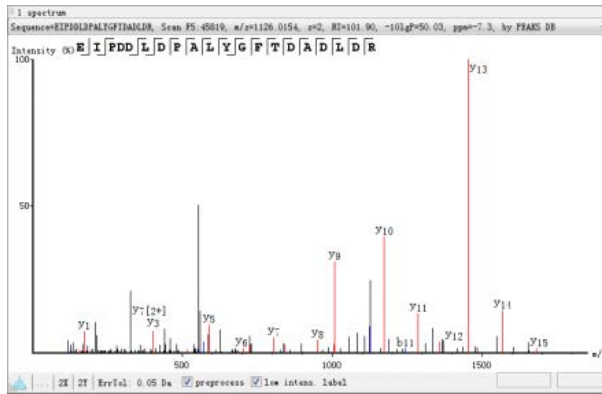

gi | 566193834

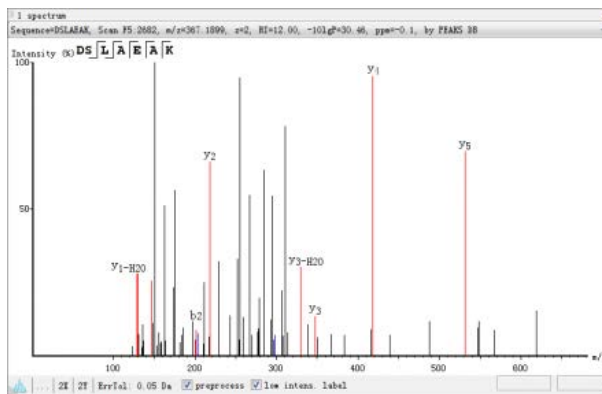

gi | 225434588

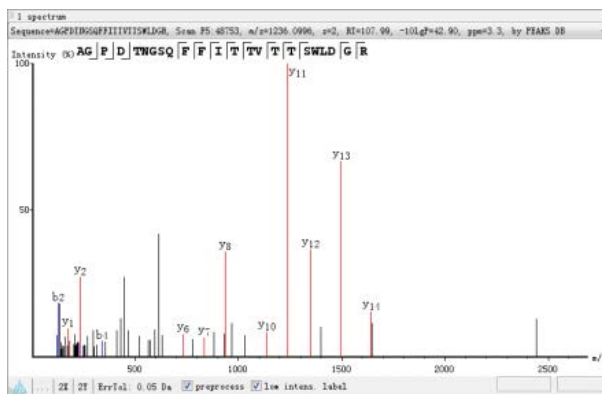

gi | 731412938

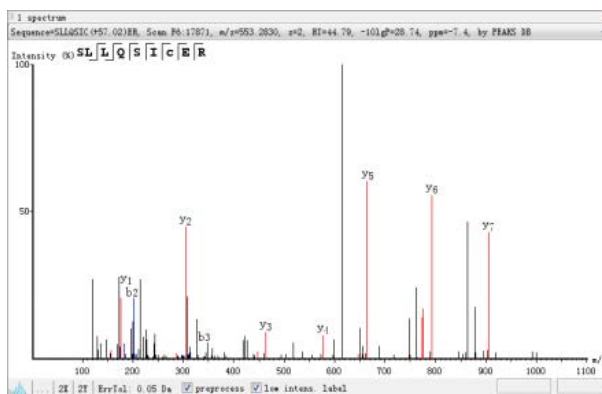

gi | 224109062

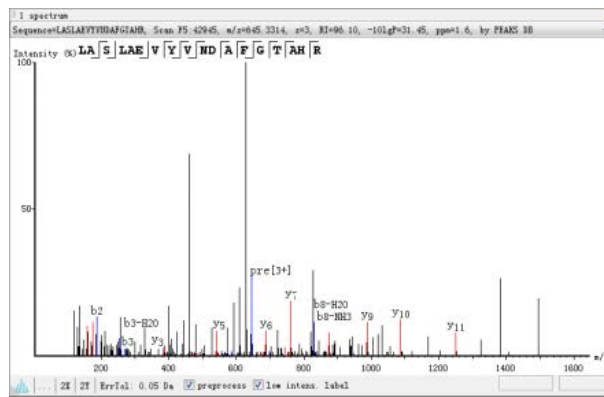

gi | 224097508

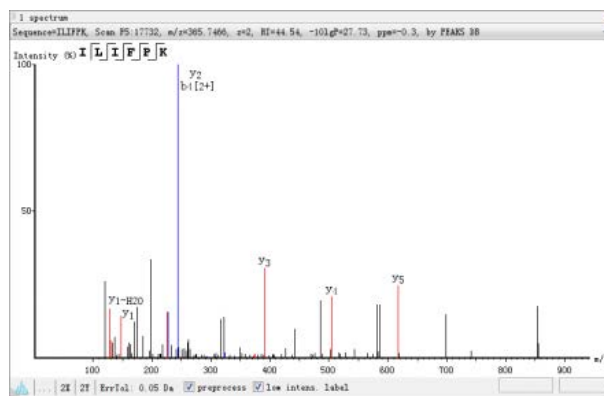

gi | 224059642

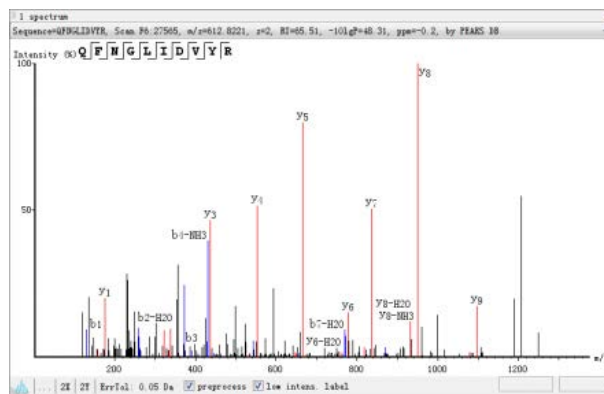

gi | 225462272

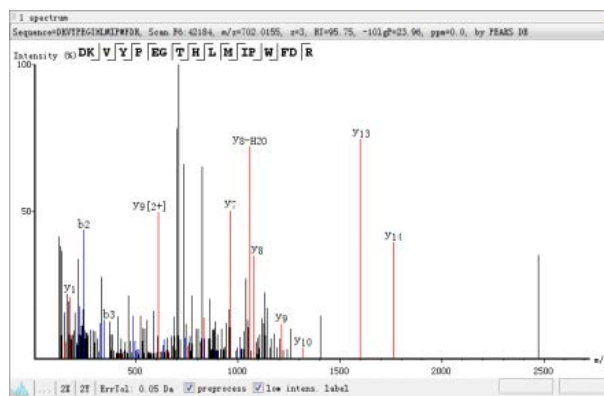

gi | 566213236

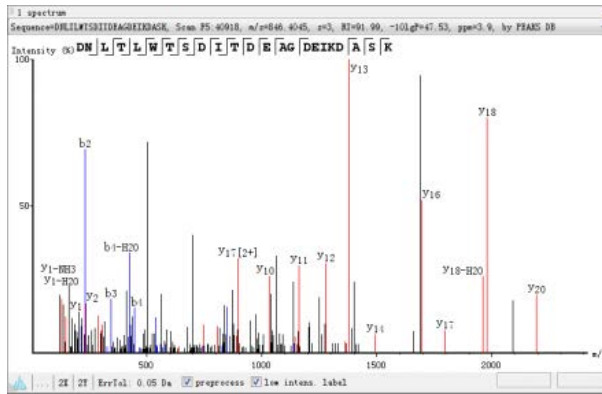

gi | 224077927

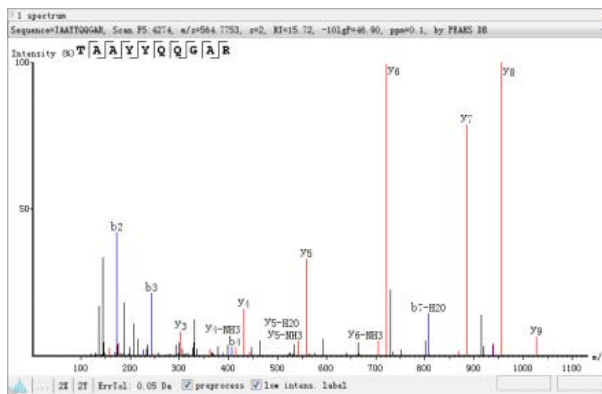

gi | 359475502

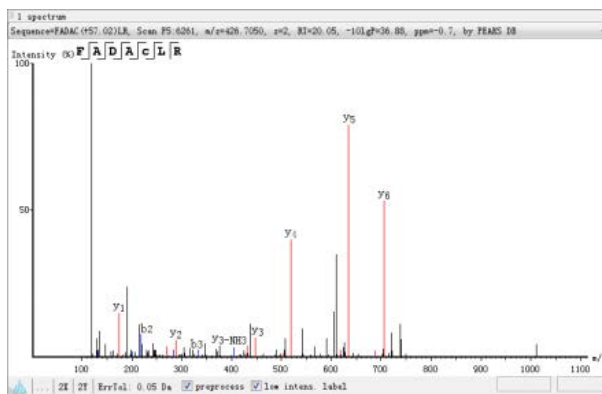

gi | 224084622

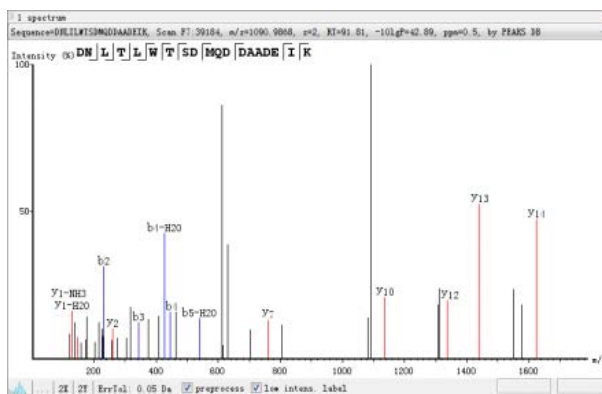



gi | 359473310

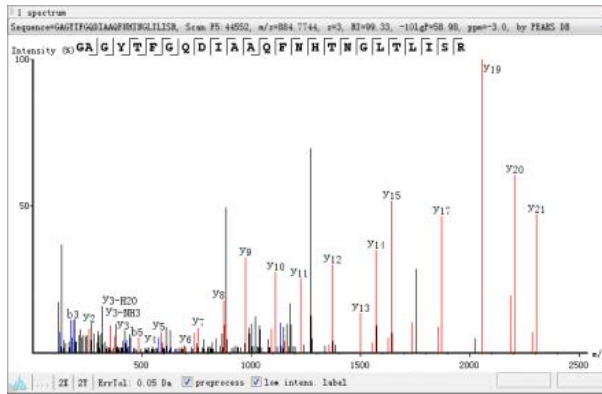

gi | 224092184

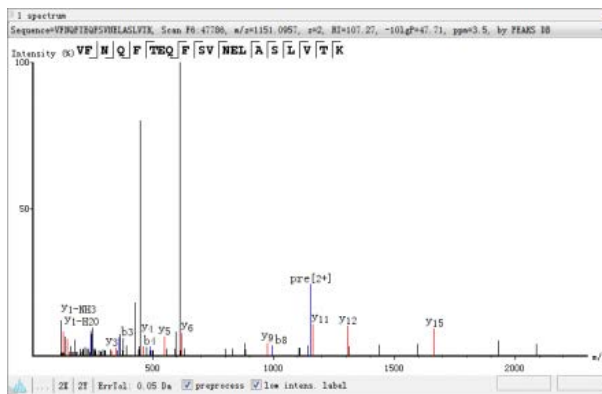

gi | 225446595

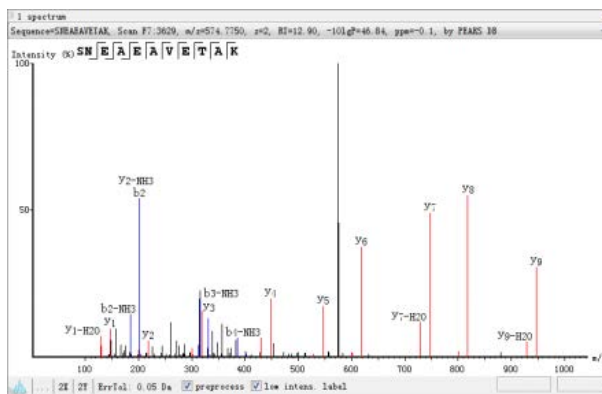

gi | 224122988

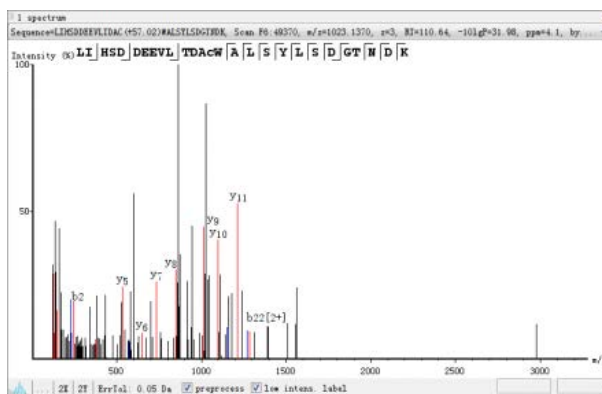

gi | 224108774

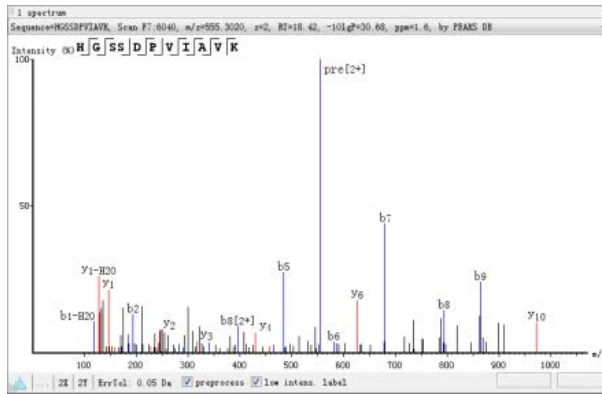

gi | 224107259

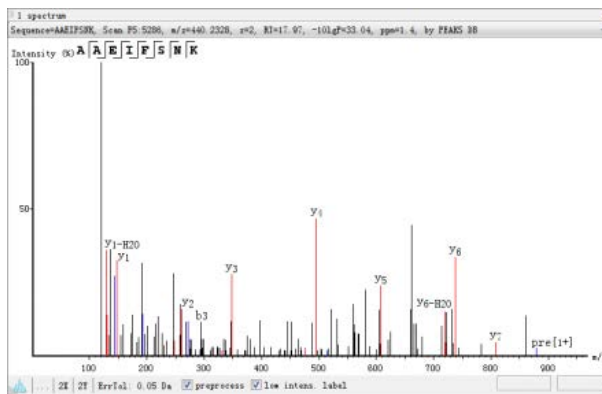

gi | 225442061

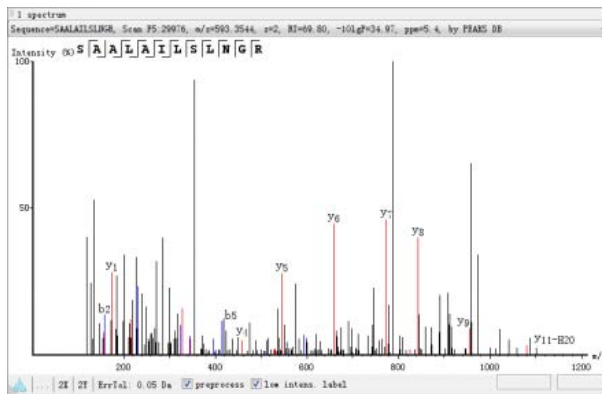

gi | 566166593

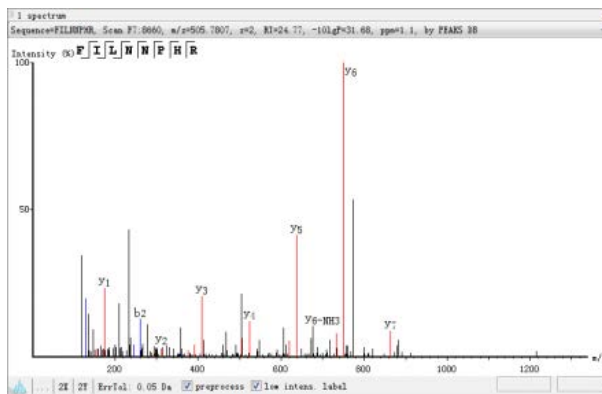

gi | 731392629

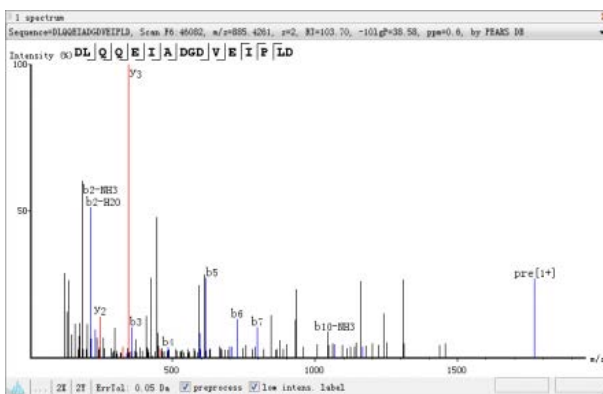

gi | 566176021

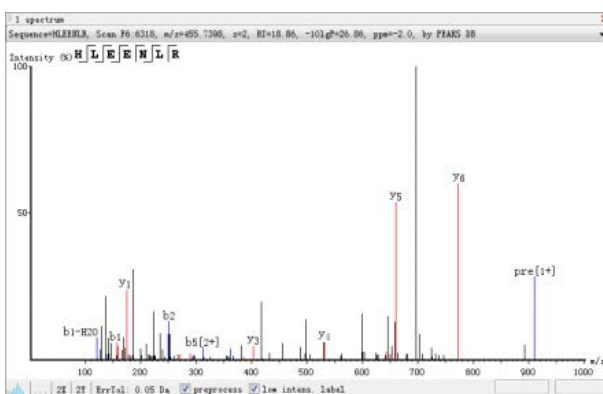

gi | 224126969

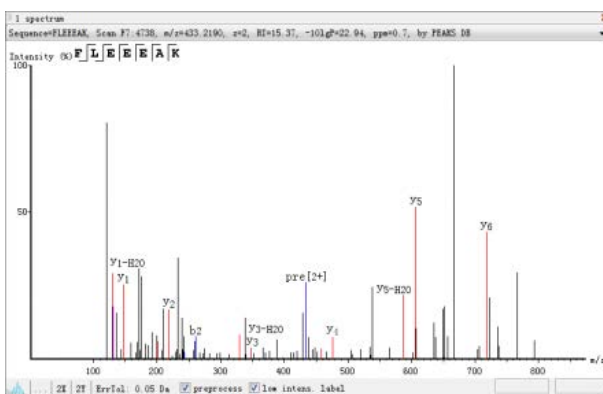

gi | 731431241

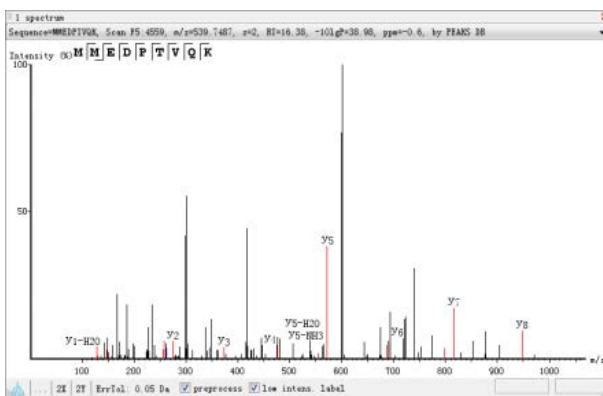

gi | 225461808

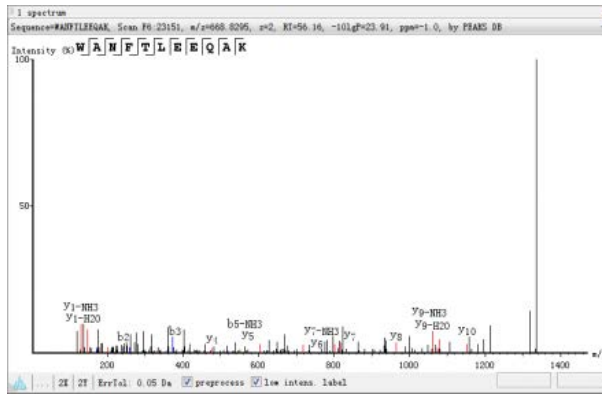

gi | 566149060

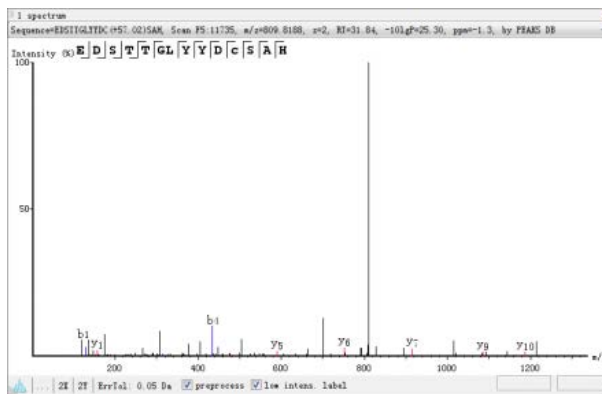

gi | 566179689

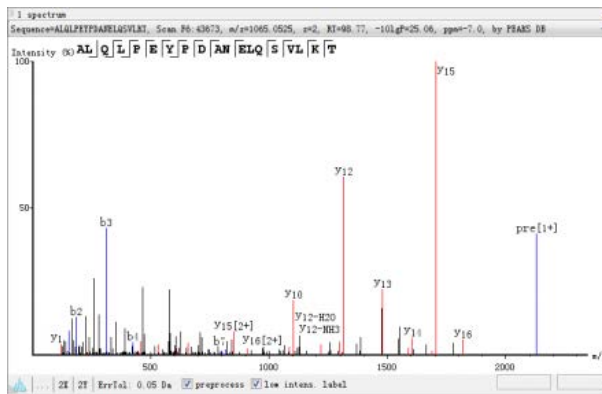

gi | 225464635

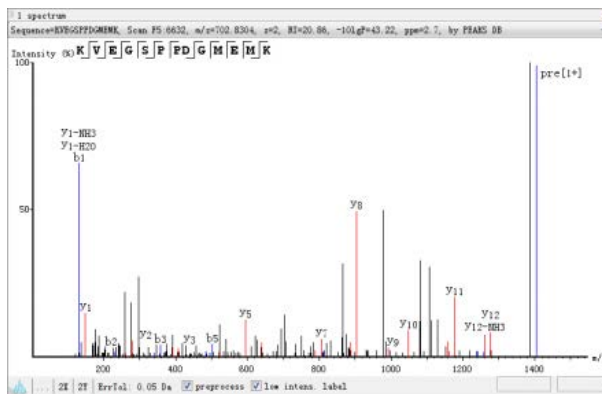

gi | 526117351

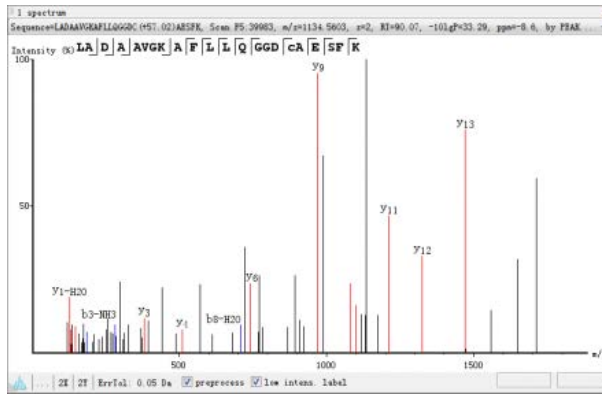

gi | 225452831

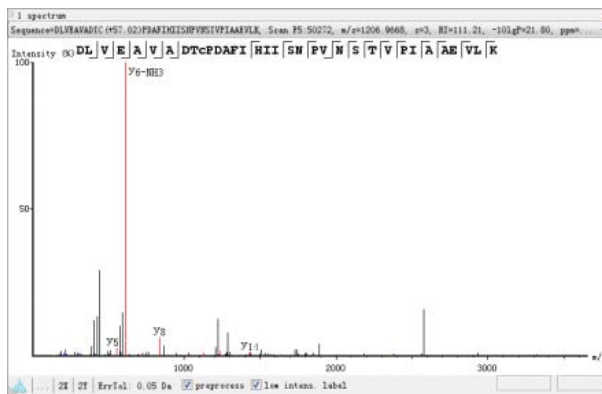

gi | 566210556

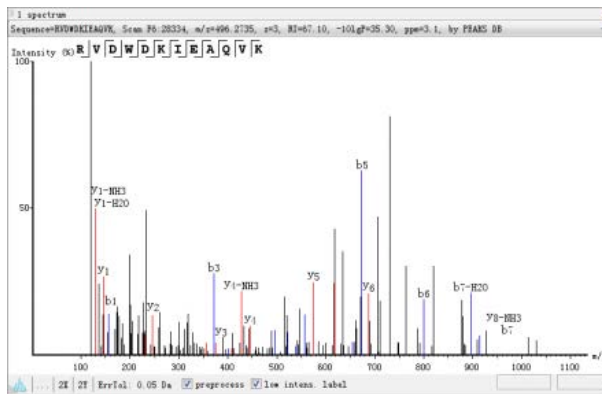

gi | 359480225

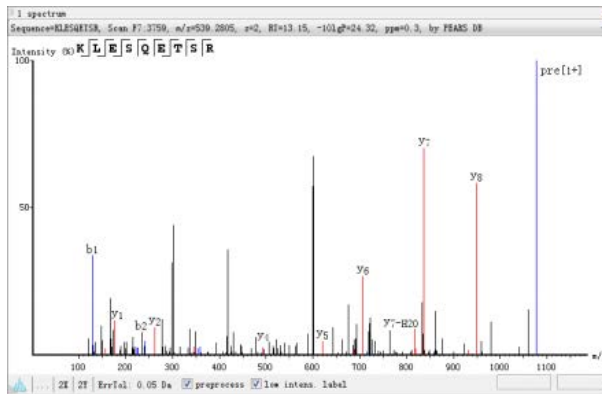

gi | 224075876

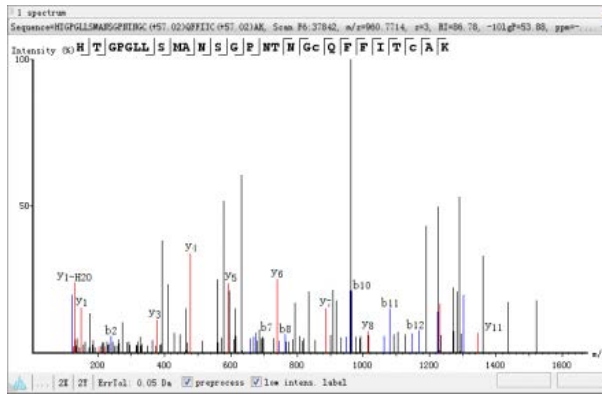

gi | 225449380

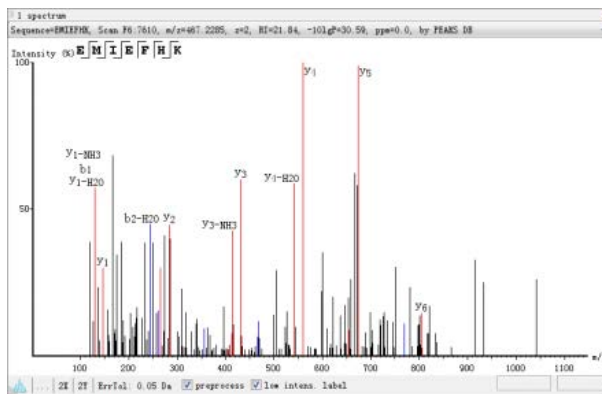

gi | 224063643

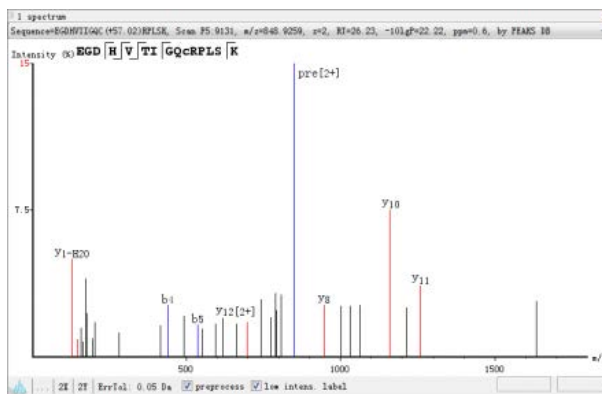

gi | 225445396

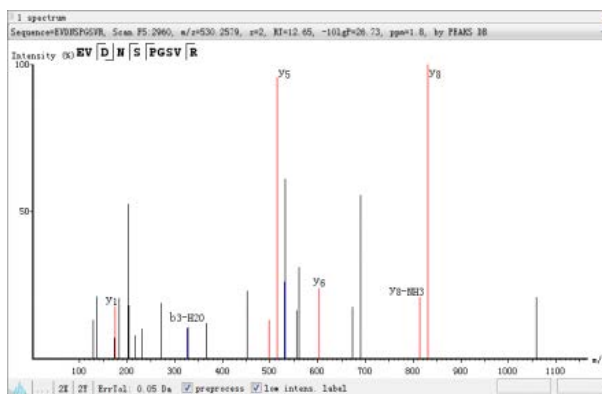

gi | 566179485

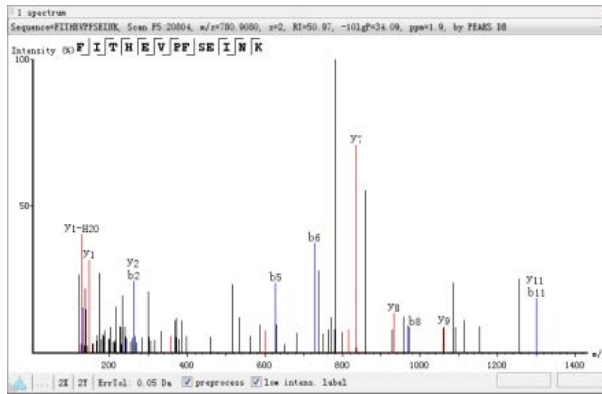

gi | 566186484

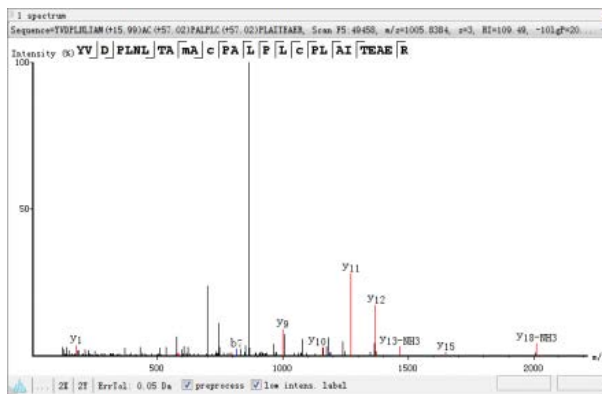

gi | 566168605

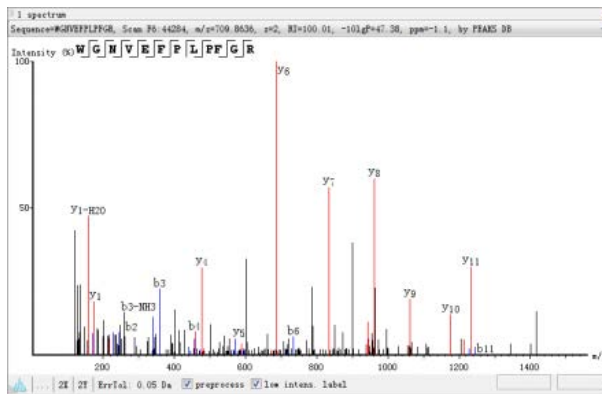

gi | 359494701

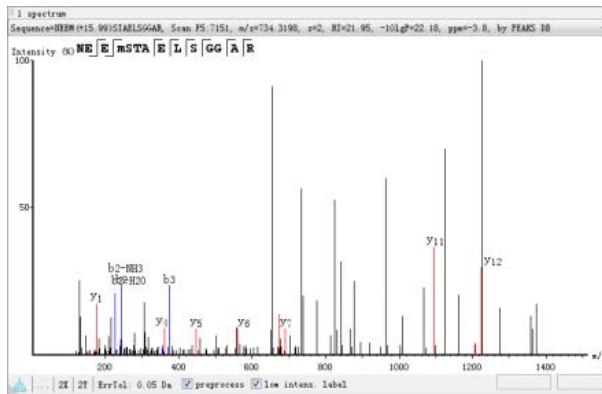

gi | 224088282

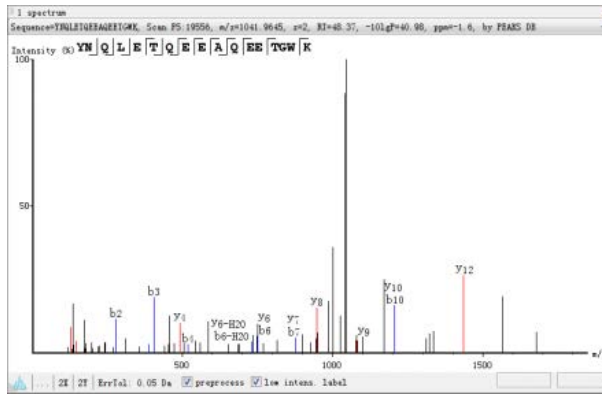

gi | 566147610

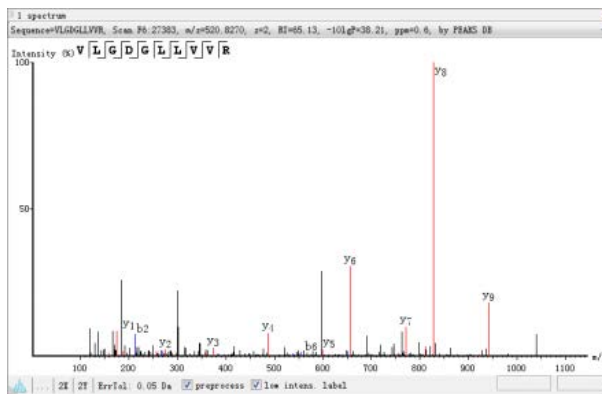

gi | 566163024

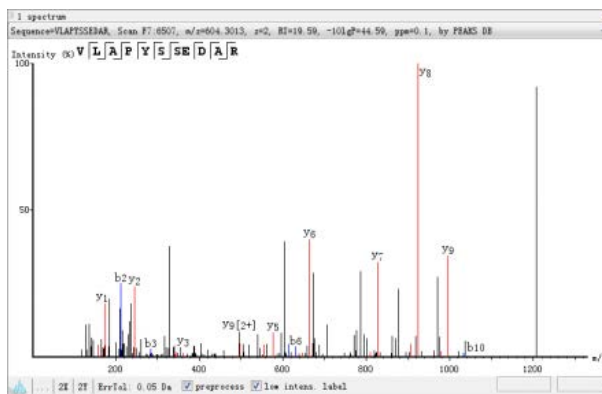

gi | 225453620

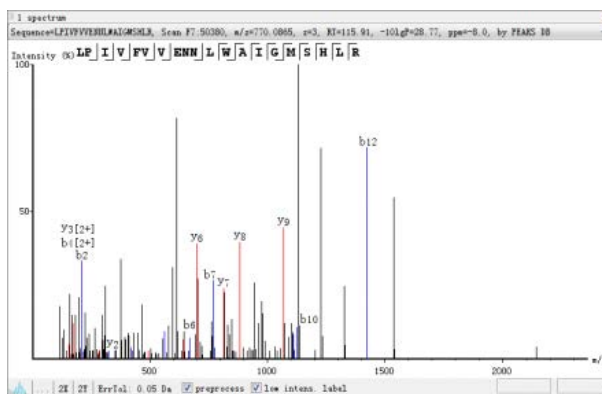



gi | 566200085

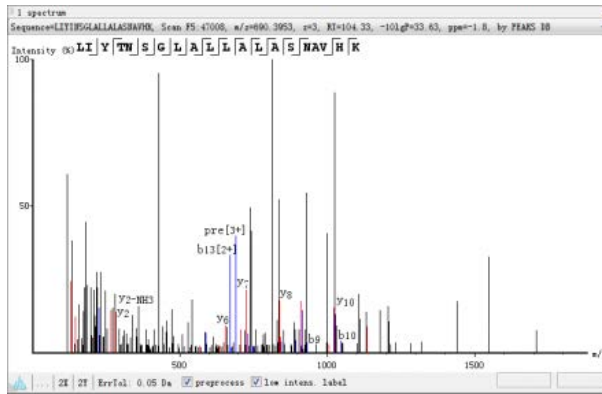

gi | 225440898

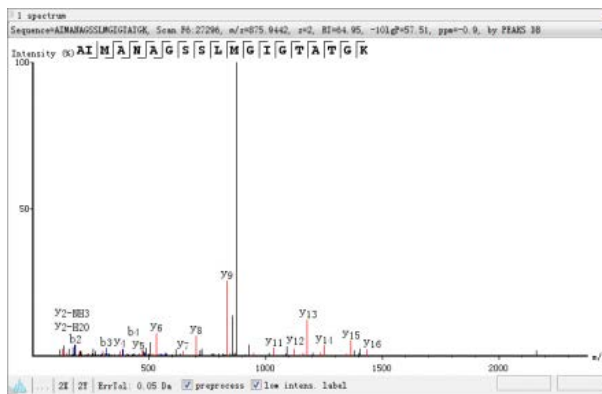

gi | 225438095

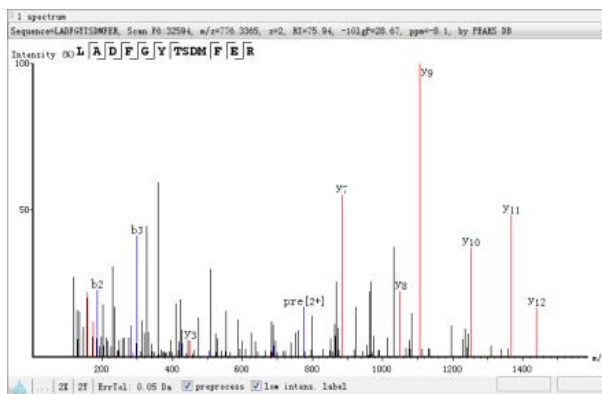

gi | 731386341

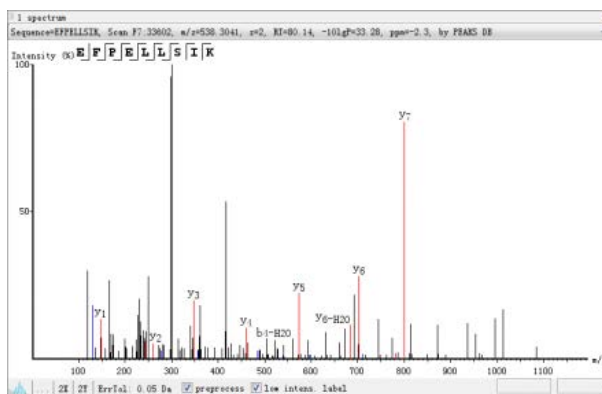

gi | 225435632

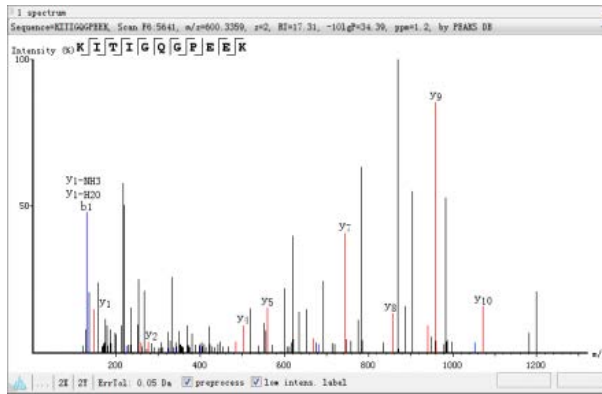

gi | 731402959

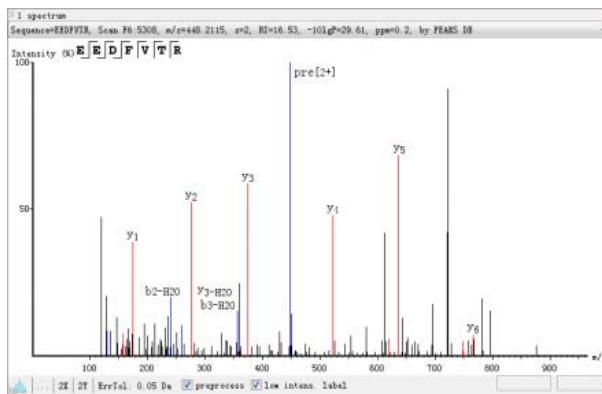

gi | 566197725

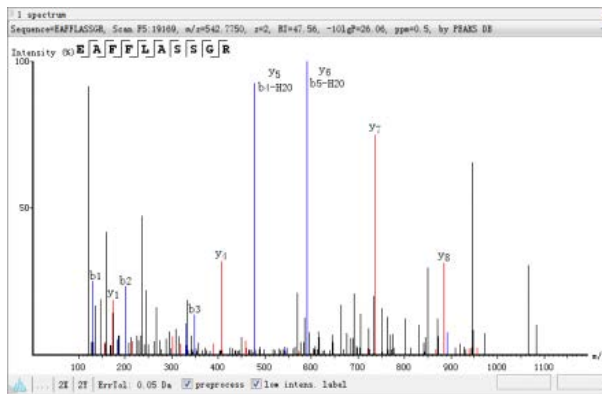

gi | 566168414

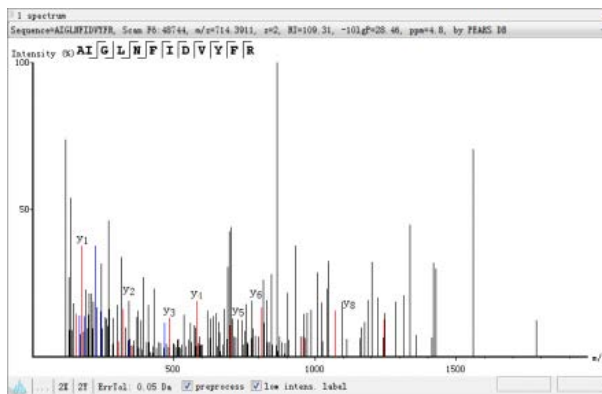

gi | 566212181

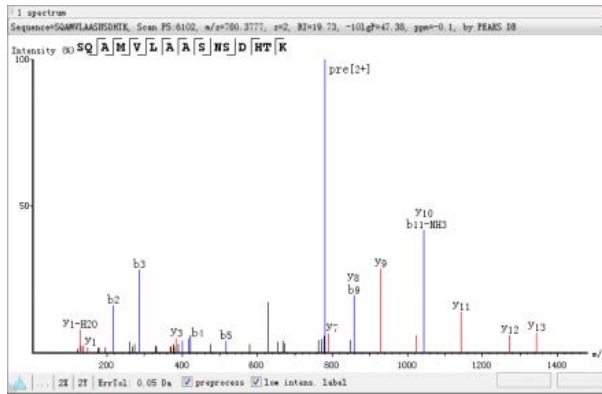

gi | 526117665

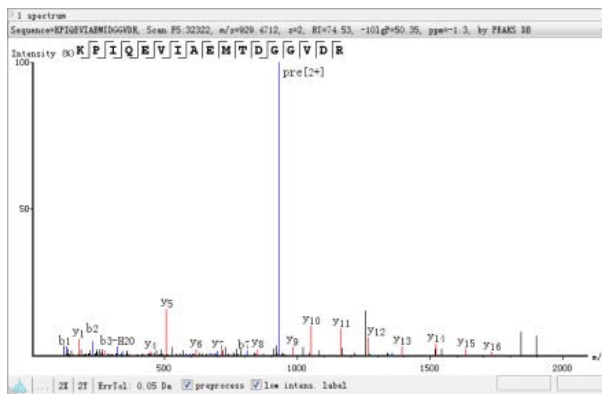

gi | 359494275

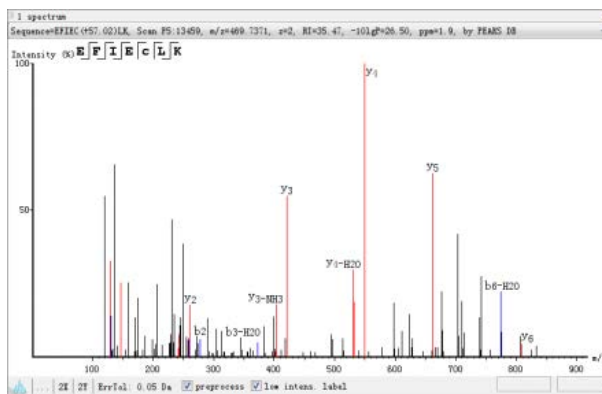

gi | 225442910

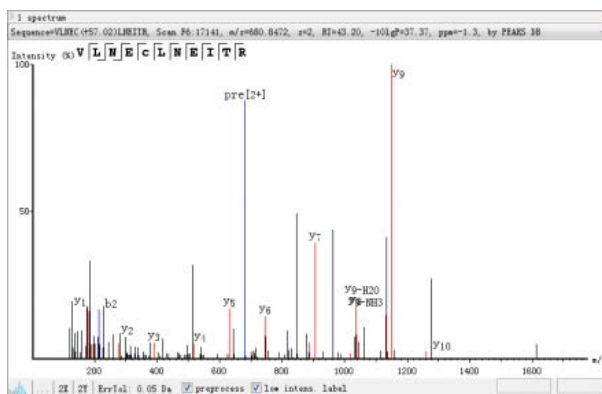

gi | 225462066

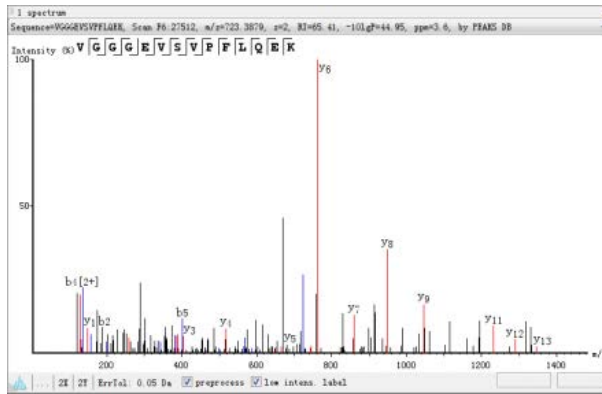

gi | 224072208

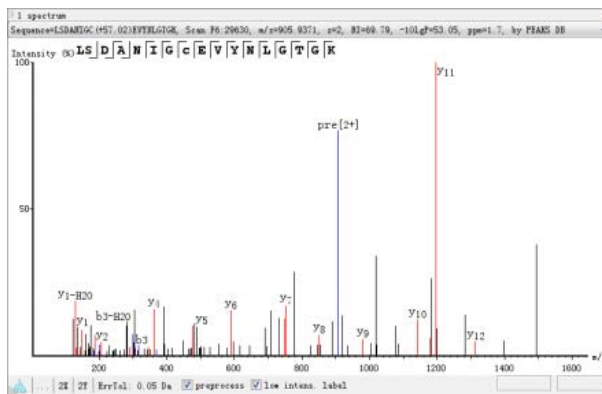

gi | 566174827

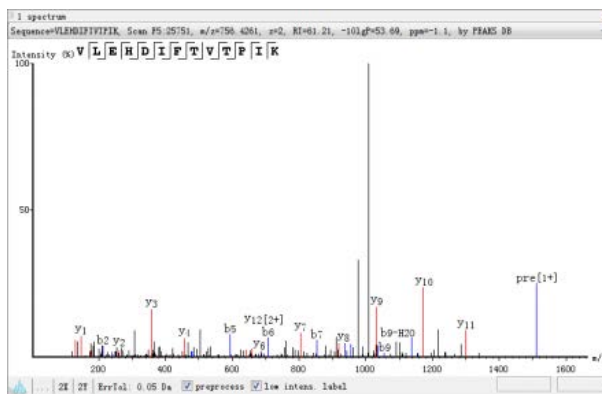

gi | 225445166

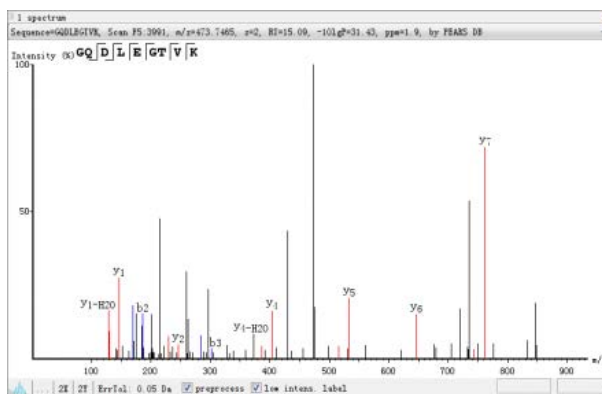

gi | 225458719

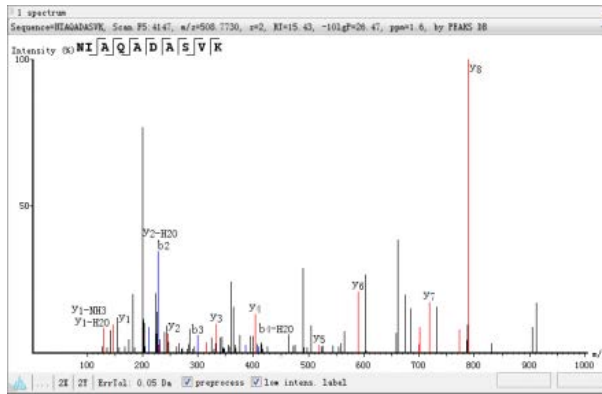

gi | 566196811

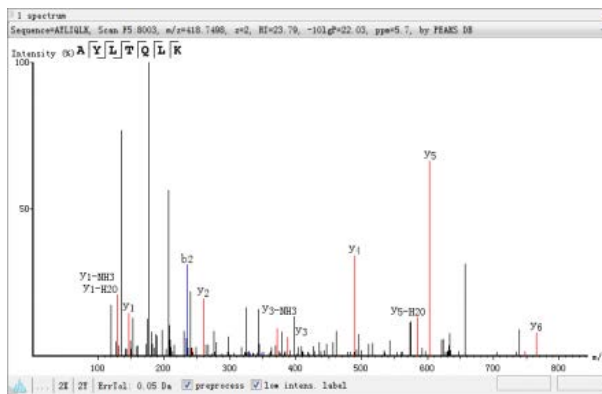

gi | 225433424

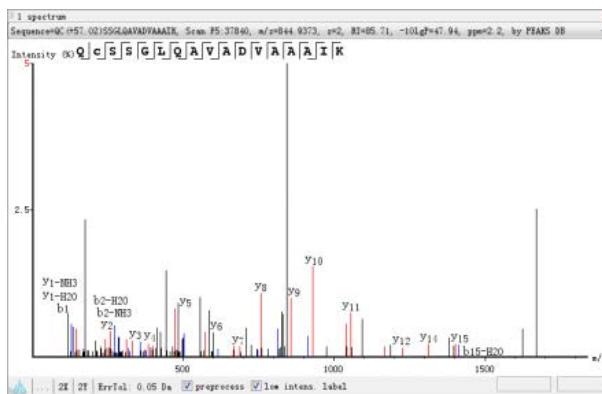

gi | 731422323

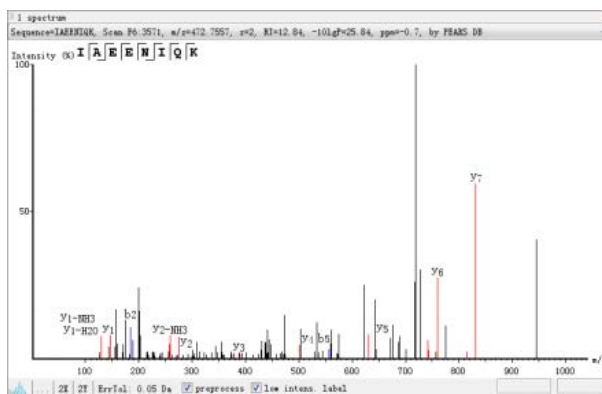

gi | 225461906

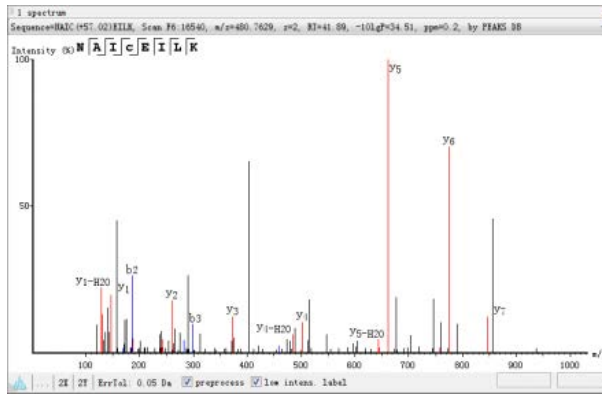

gi | 225452646

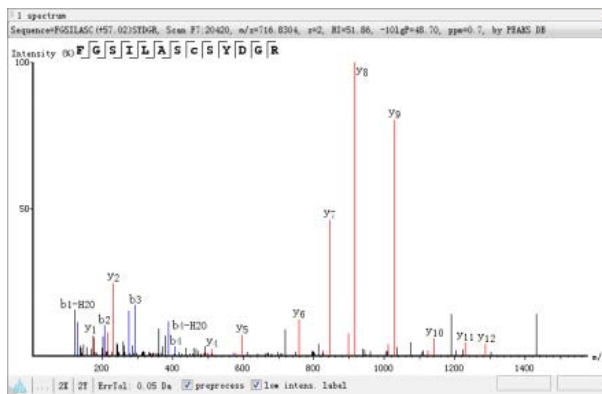

gi | 224097915

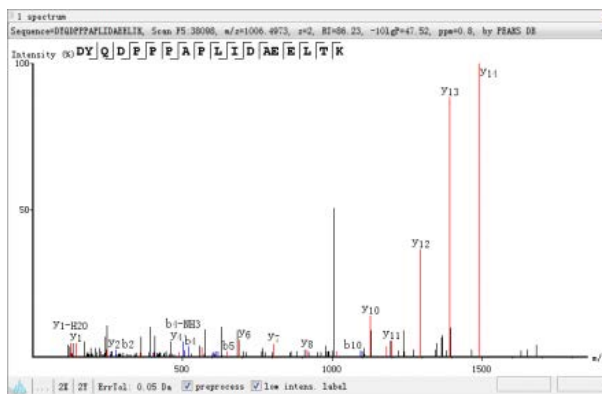

gi | 731392621

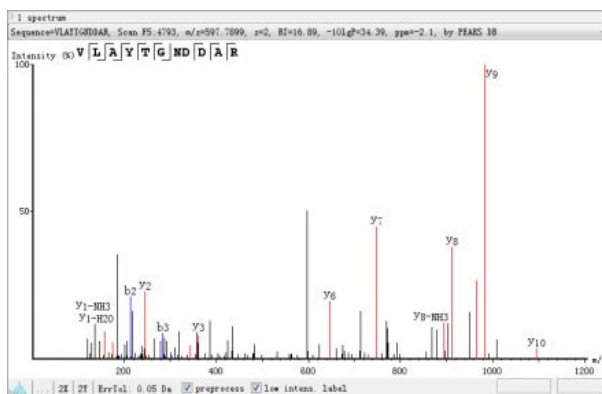

gi | 566215059

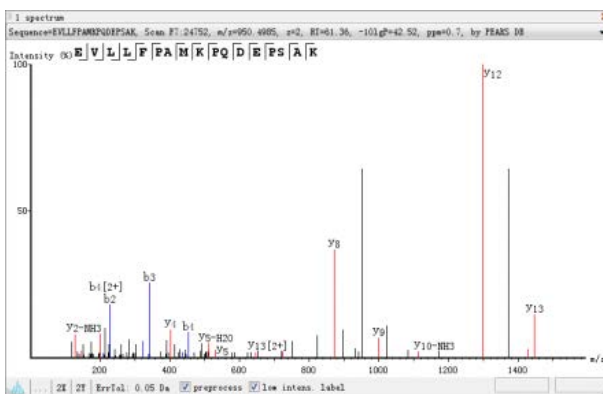

gi | 224087393

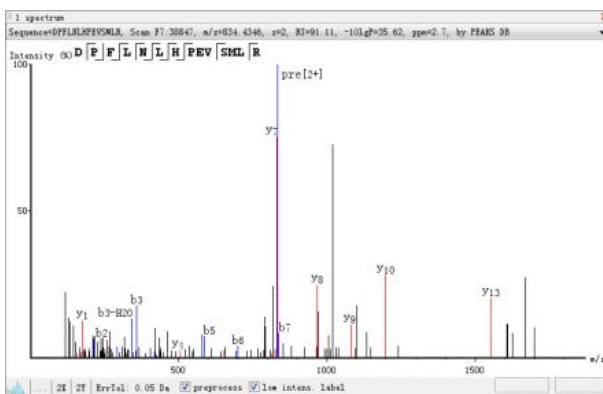

gi | 225450677

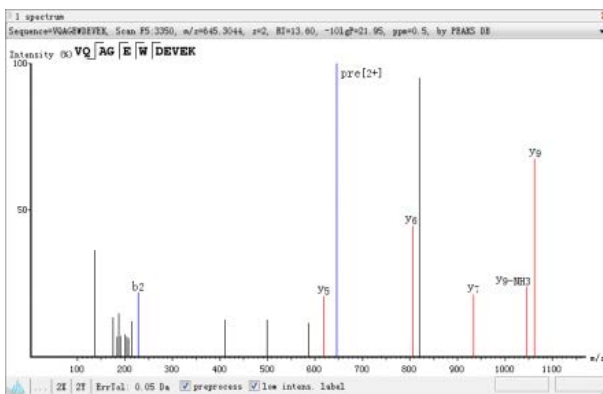

gi | 225451233

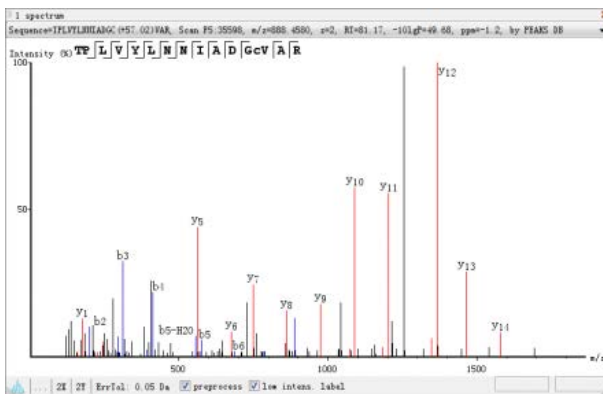

gi | 224054773

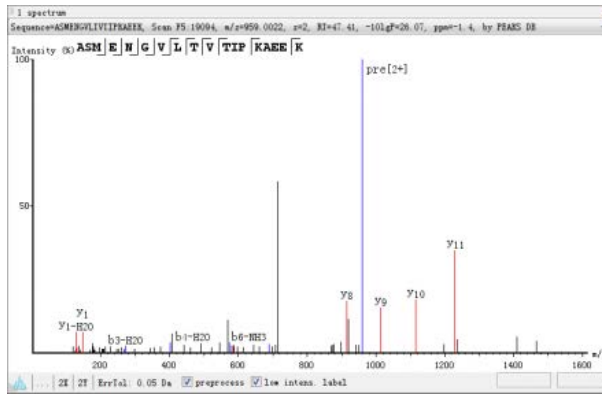

gi | 224074217

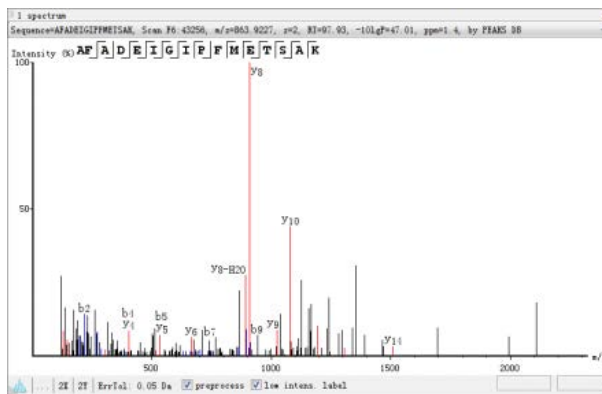

gi | 731393107

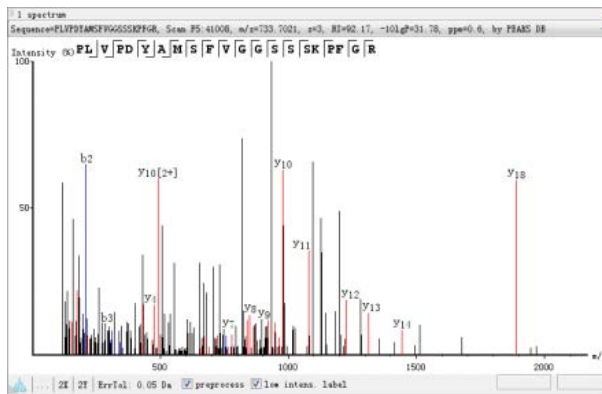

gi | 566153407

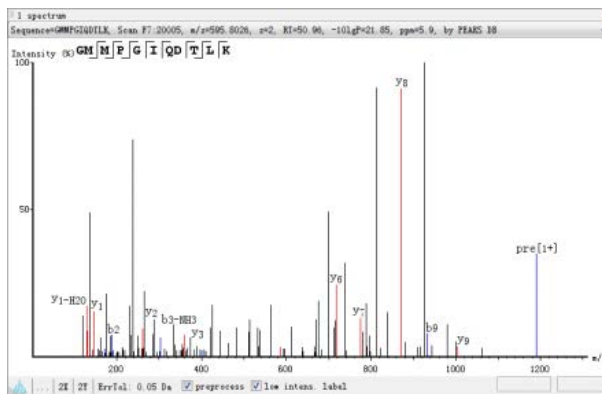



gi | 566200709

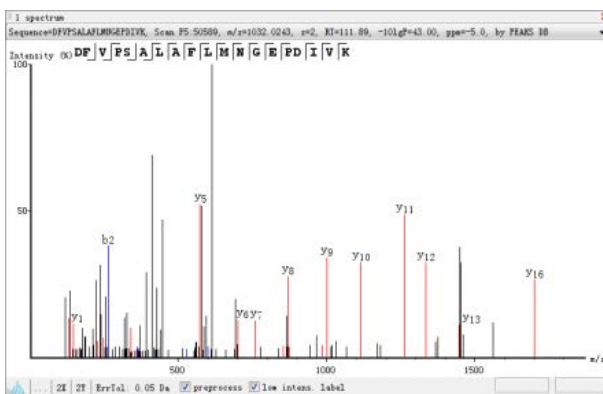

gi | 566214594

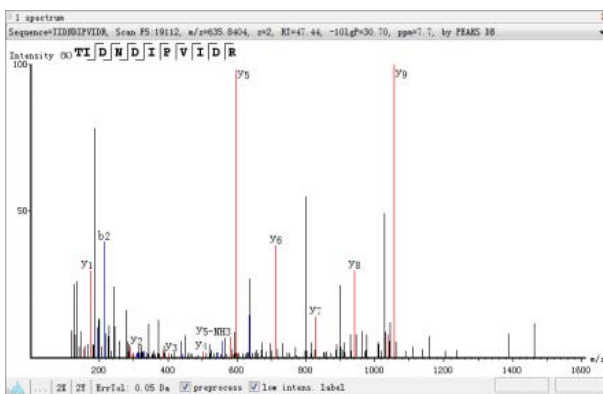

gi | 225465870

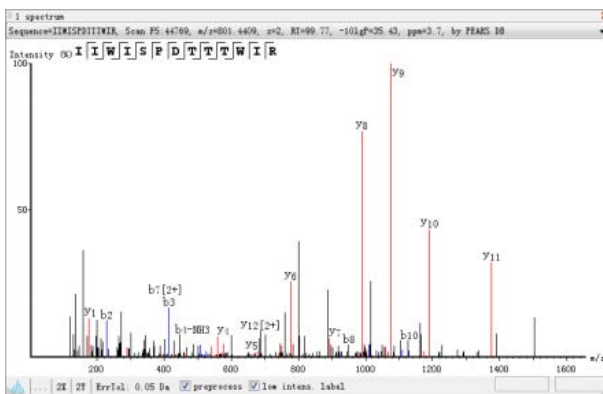

gi | 566176600

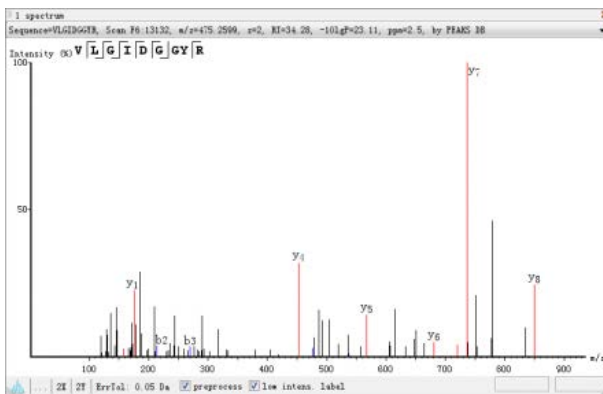

gi | 566197479

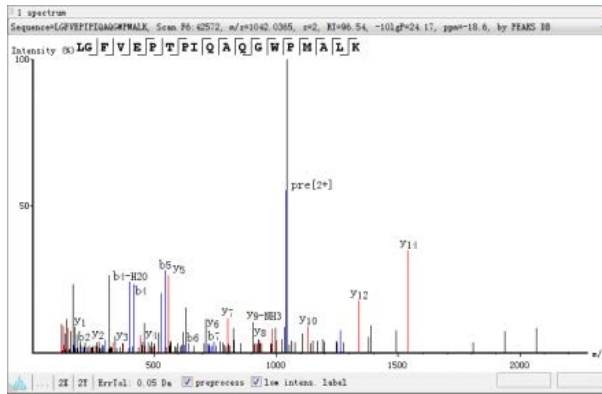

gi | 225430510

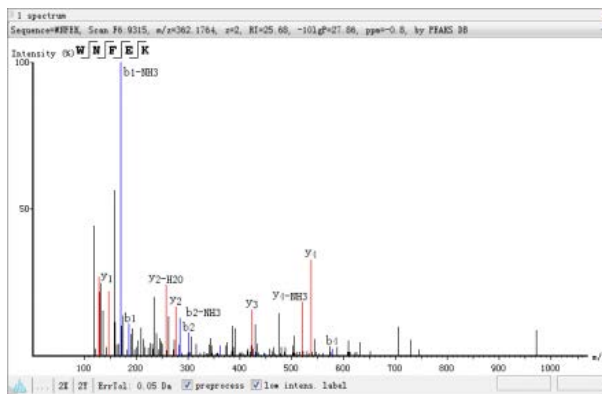

gi | 566253285

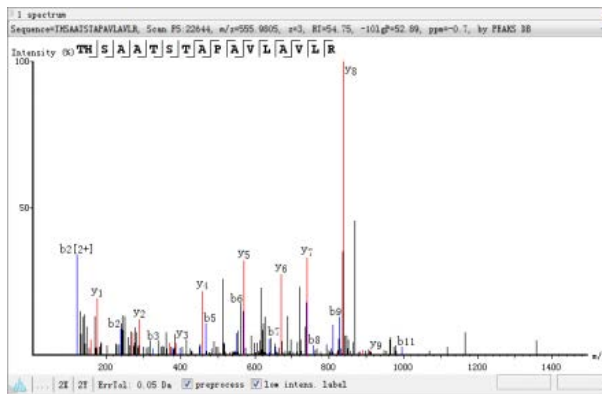

gi | 225427234

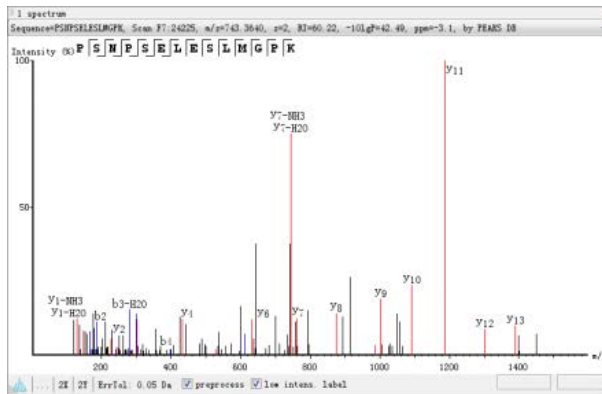

gi | 731391337

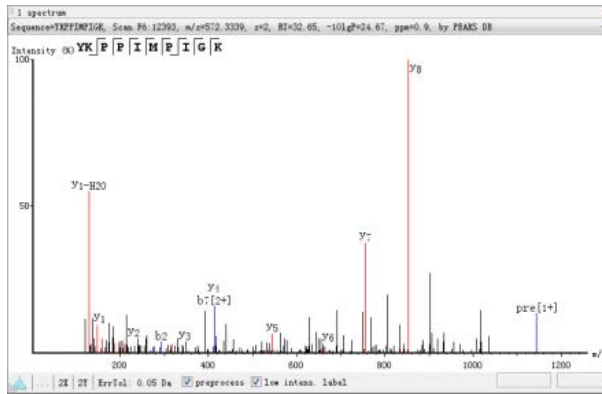

gi | 731430343

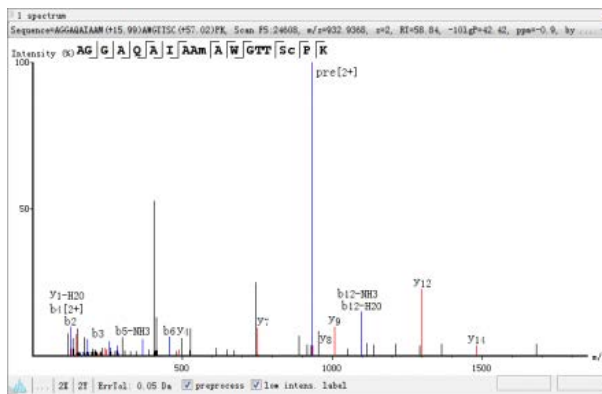

gi | 359474156

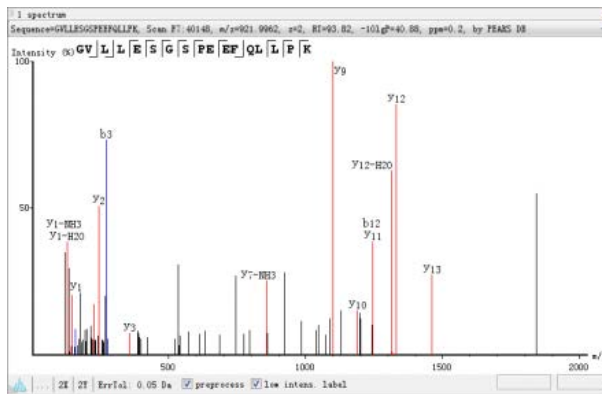

gi | 225428566

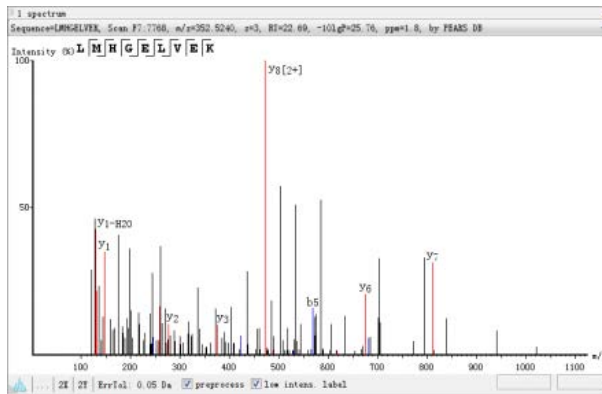

gi | 225444609

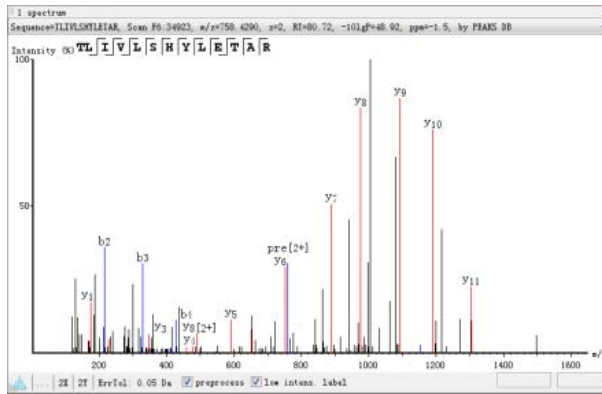

gi | 224096918

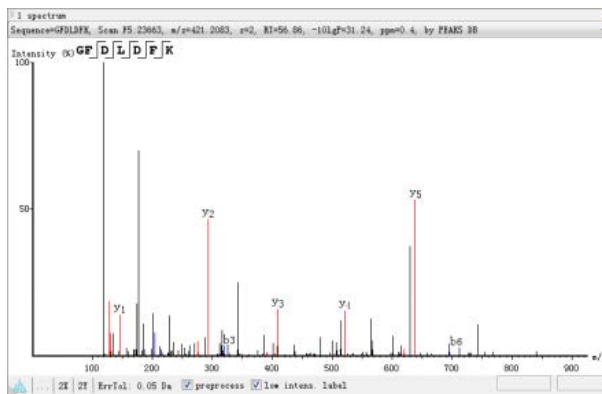

gi | 566256791

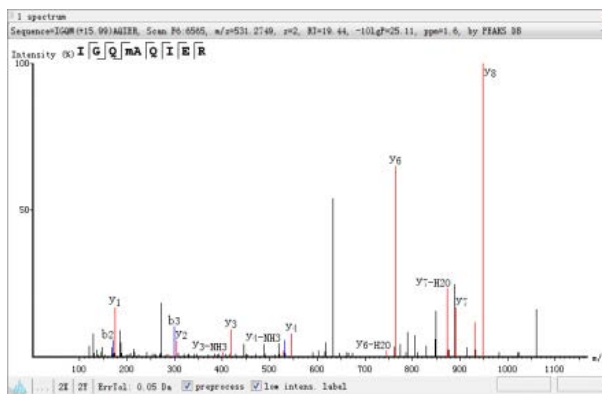

gi | 566208913

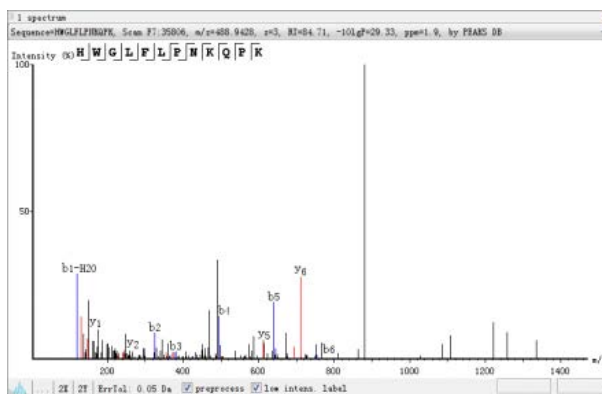

gi | 225440480

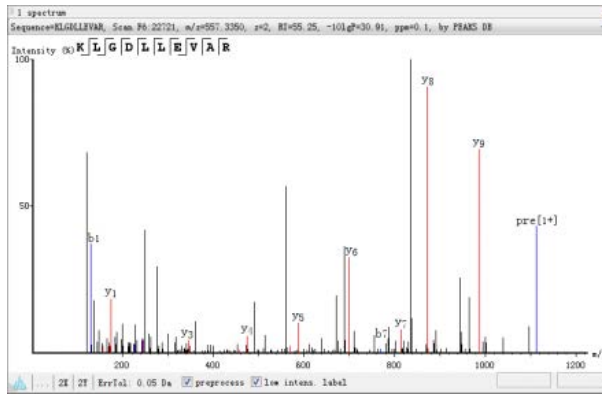

gi | 566209593

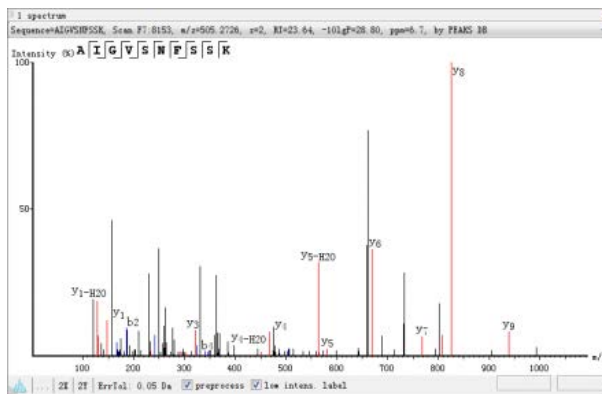

gi | 224103461

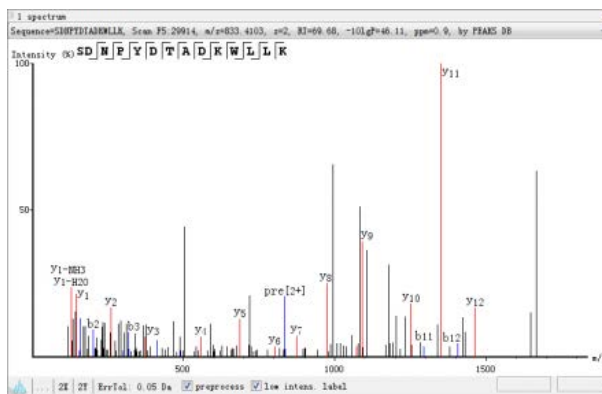

gi | 224146178

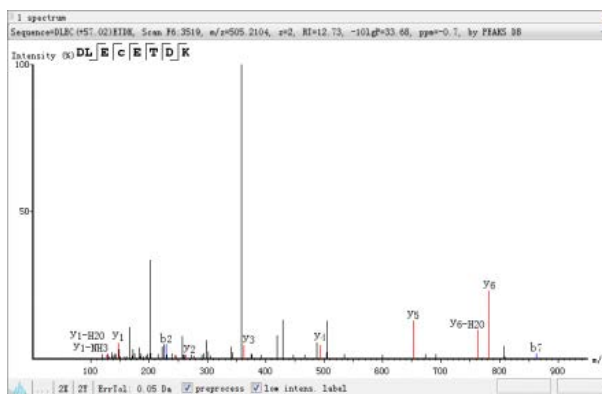

gi | 566148153

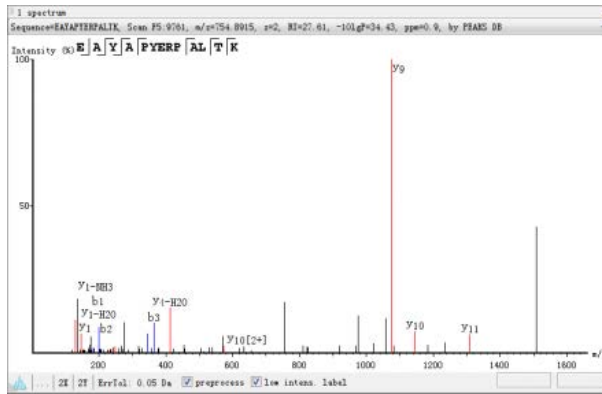

gi | 566177670

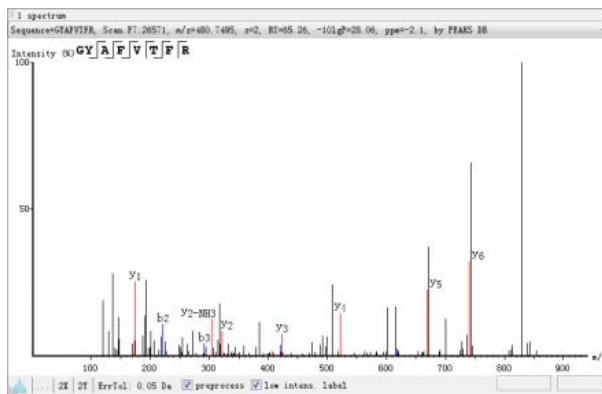

gi | 225442434

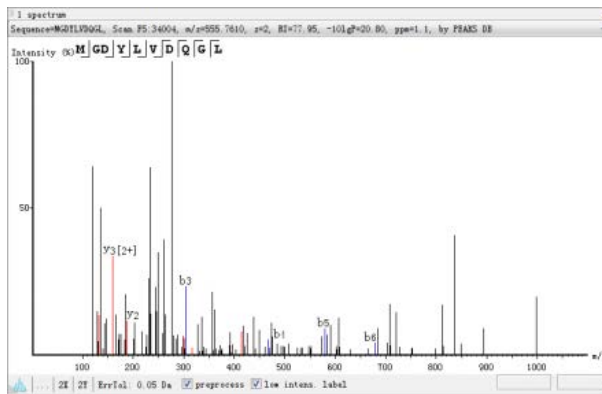

gi | 225437515

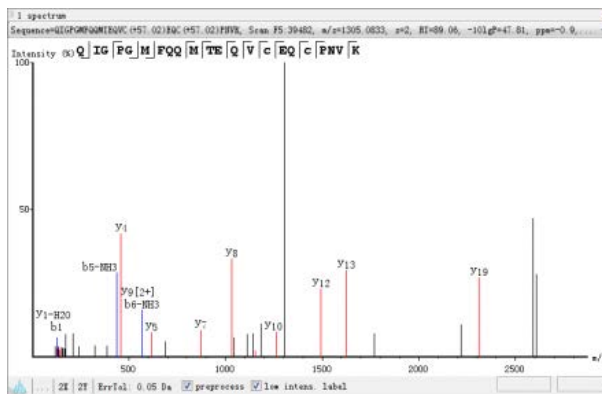

gi | 566205979

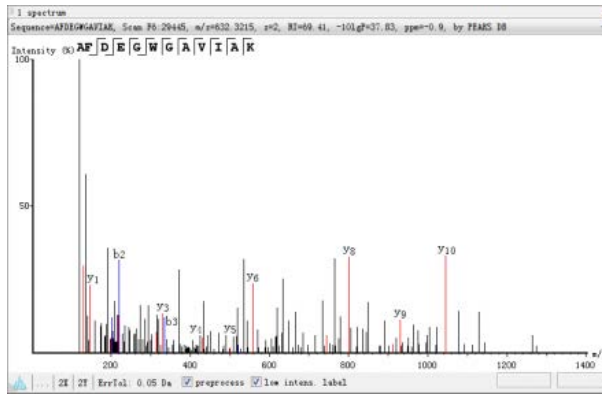

gi | 526117828

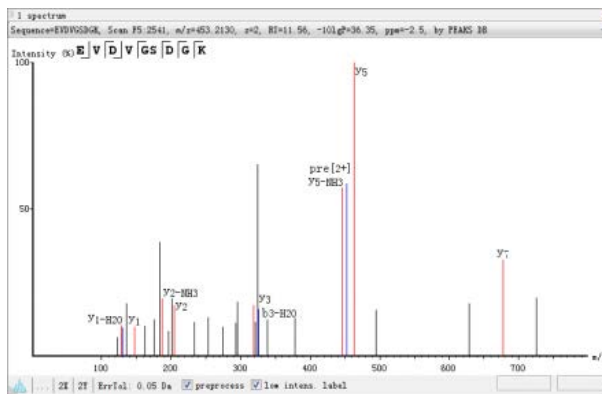

gi | 731369373

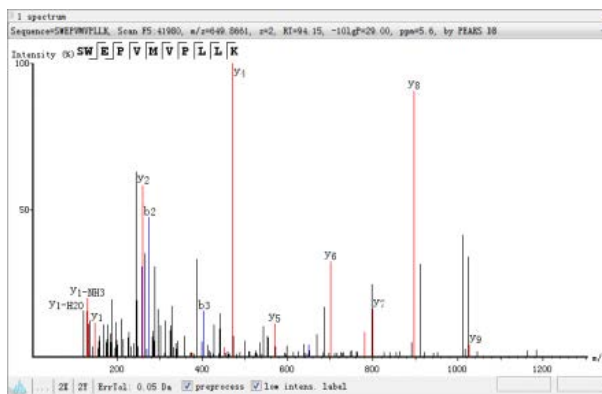

gi | 566181279

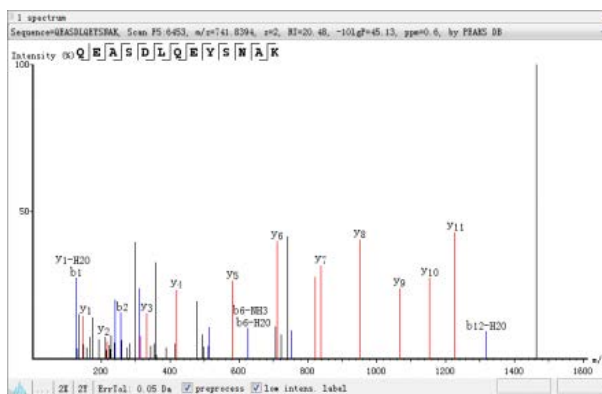

gi | 224141563

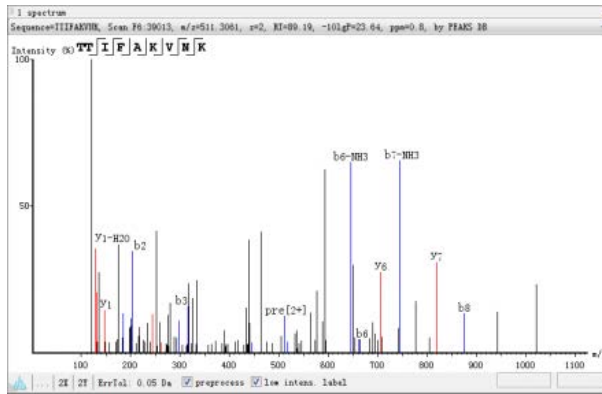

gi | 731410110

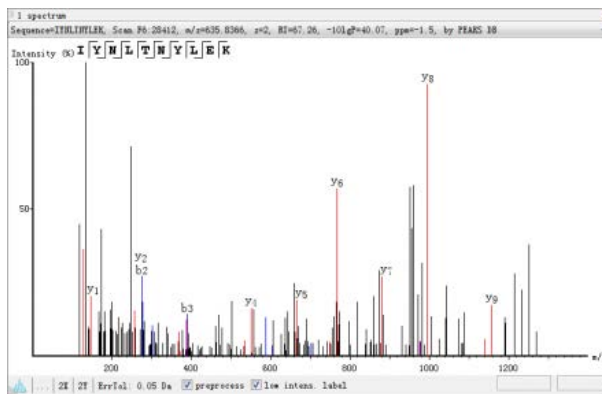

gi | 225433676

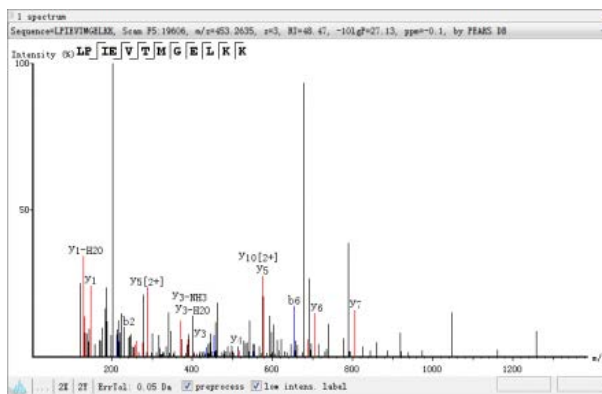

gi | 566170295

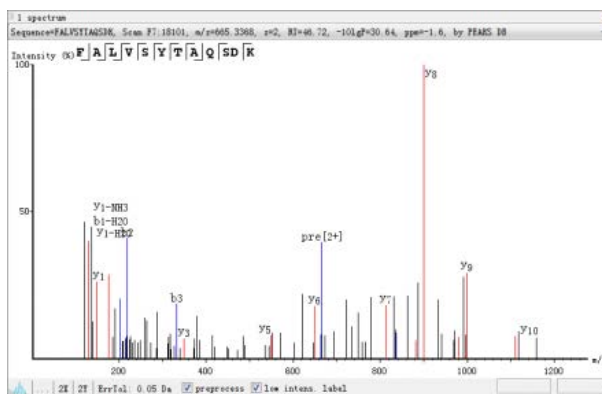



gi | 731402065

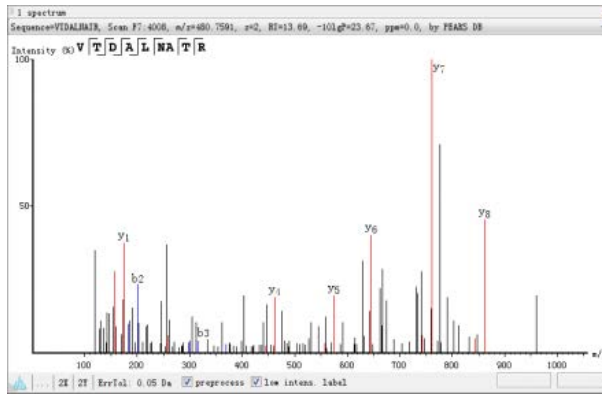

gi | 224108087

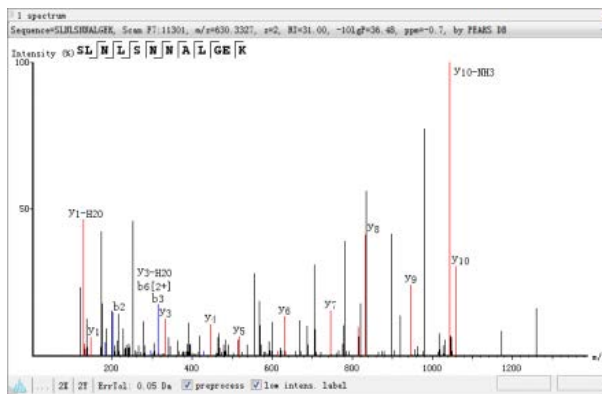

gi | 731405420

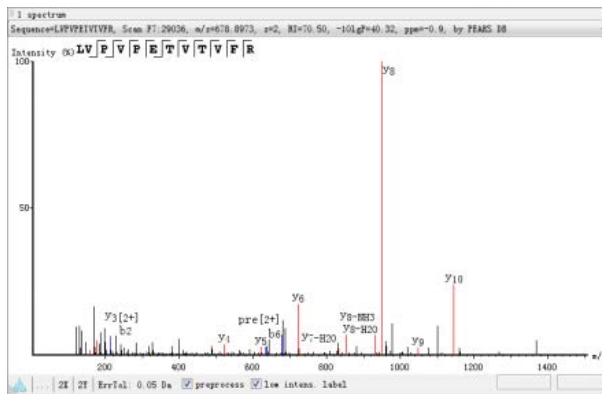

gi | 225448433

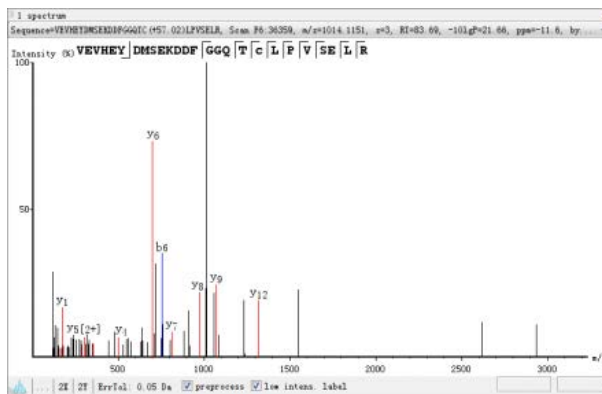

gi | 225455386

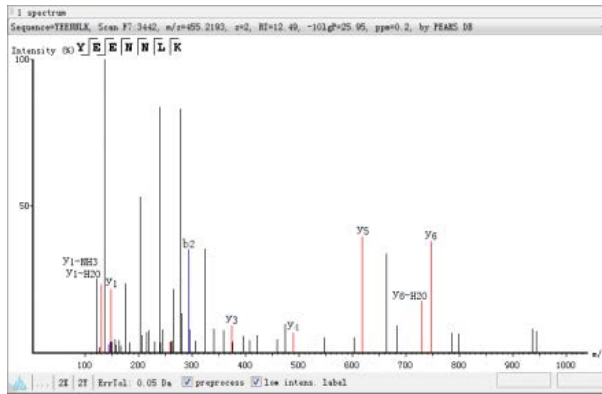

gi | 225449198

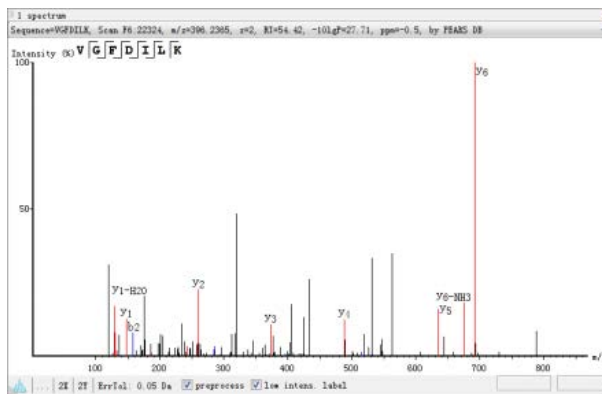

gi | 566204168

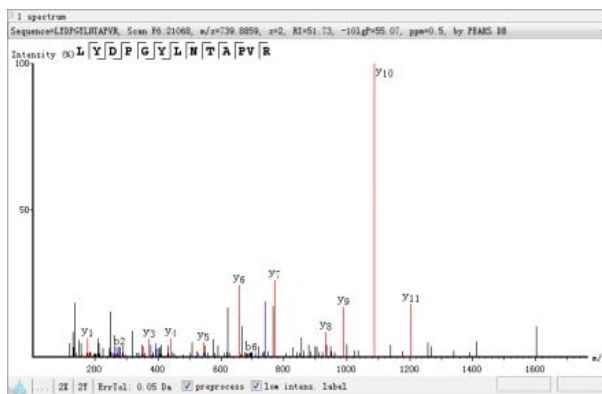

gi | 224086130

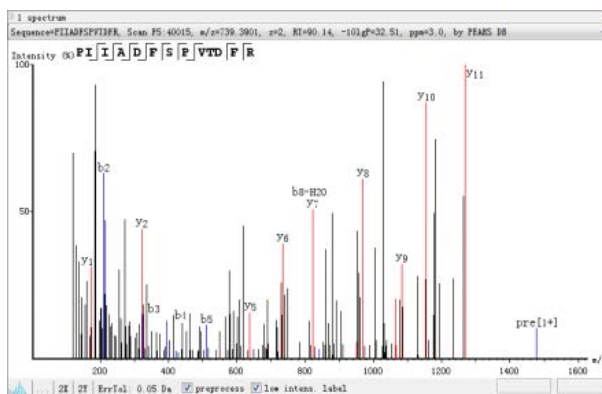

gi | 731383113

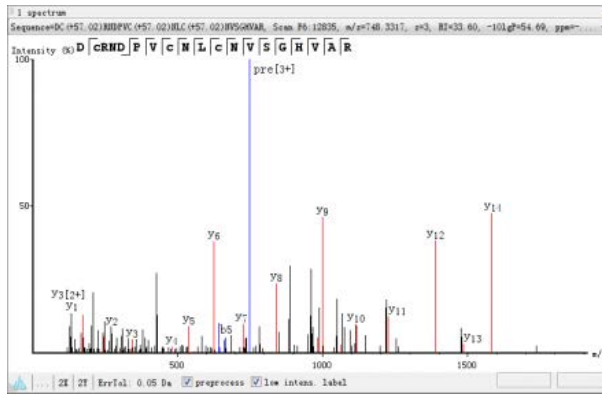

gi | 731438722

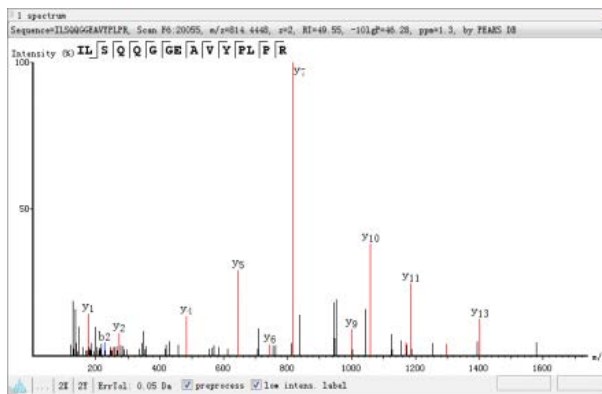

gi | 224075888

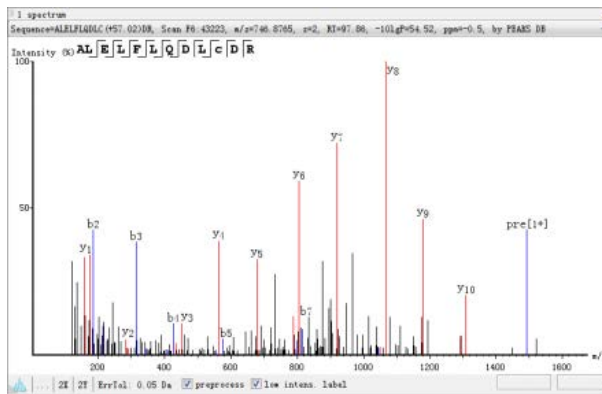

gi | 731400520

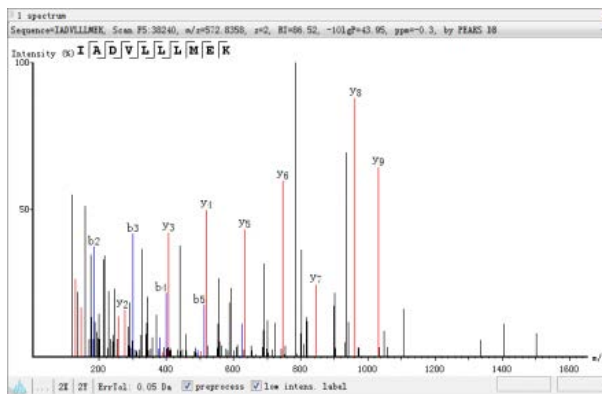

gi | 359489456

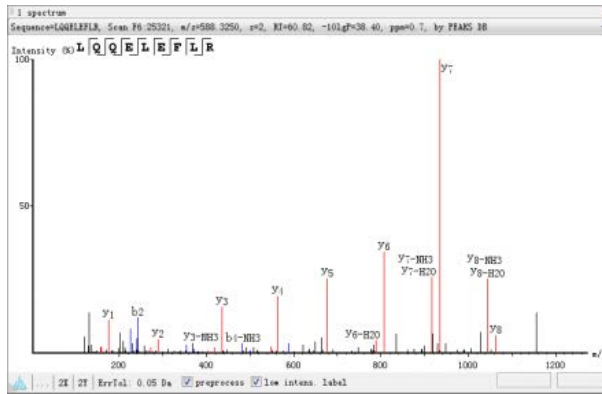

gi | 359476827

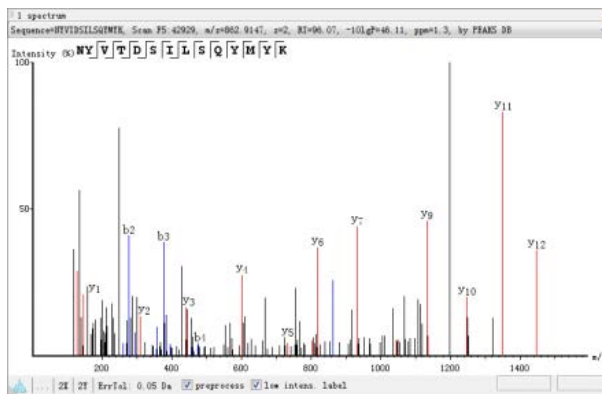

gi | 566159086

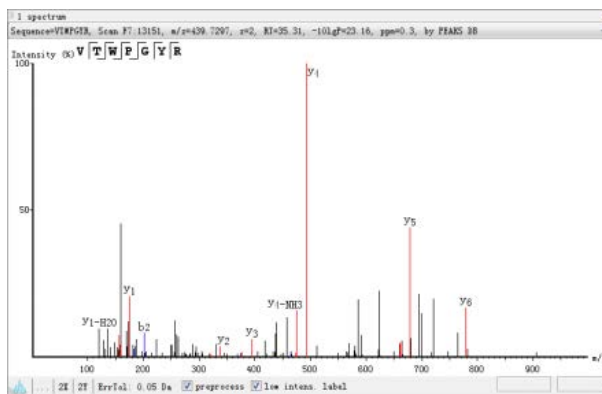

gi | 566153022

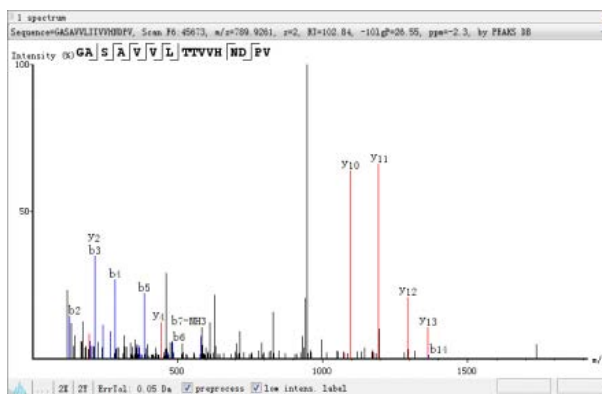

gi | 225435594

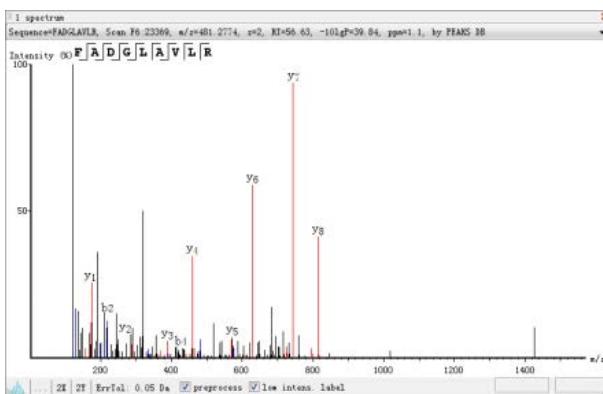

gi | 731378986

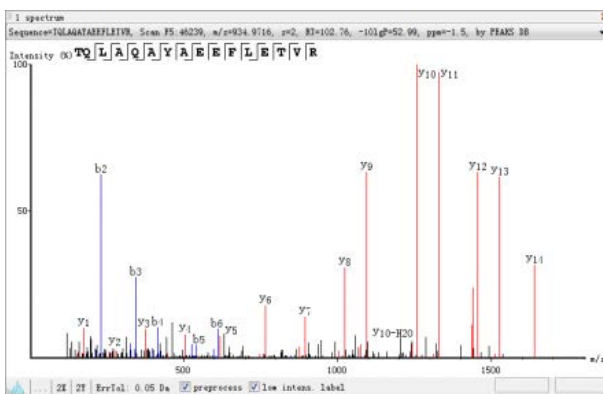

gi | 566160921

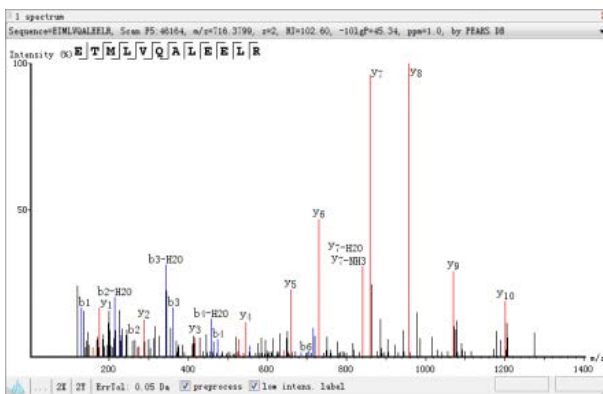

gi | 731397329

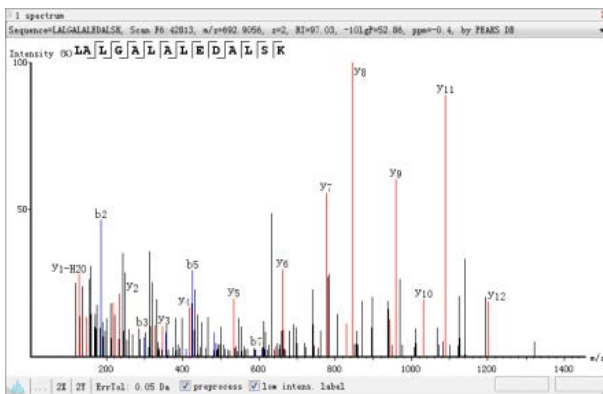

gi | 224117526

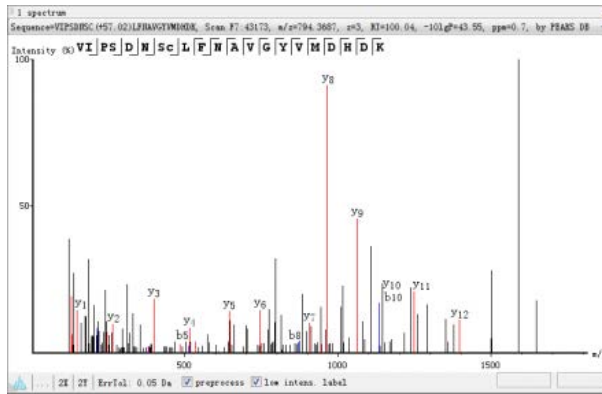

gi | 225434197

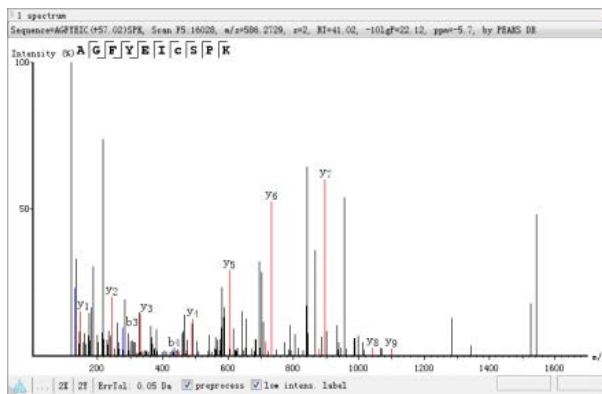

gi | 731403895

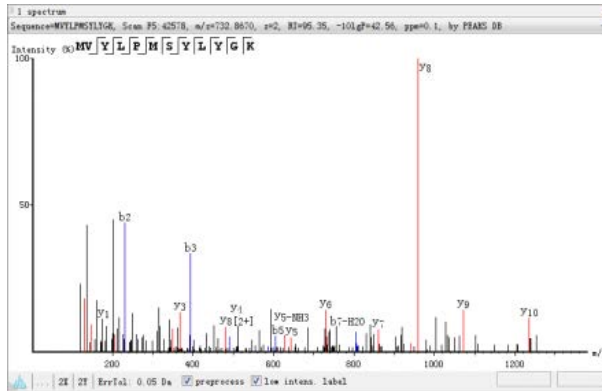

gi | 566168456

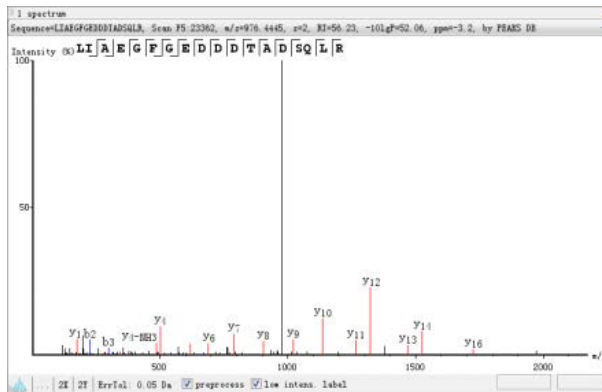

gi | 225434156

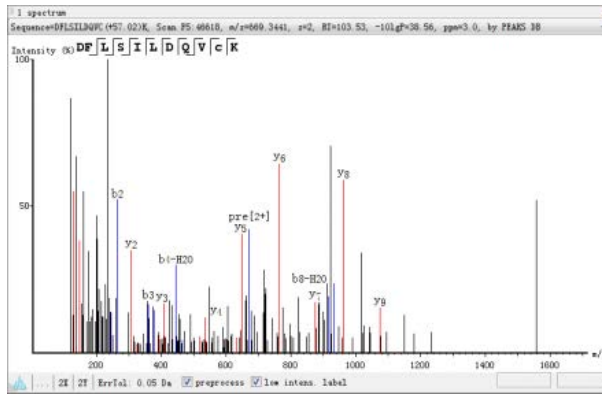

gi | 359488959

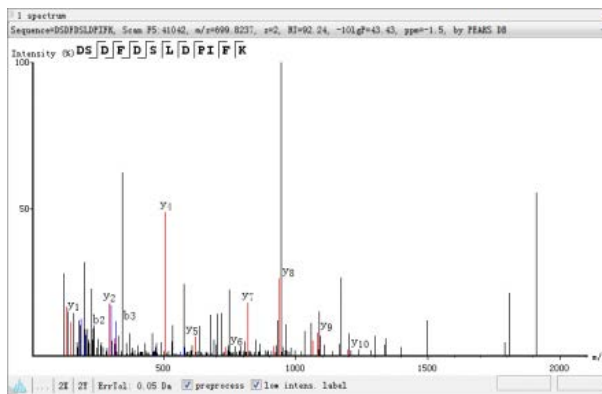

gi | 731393417

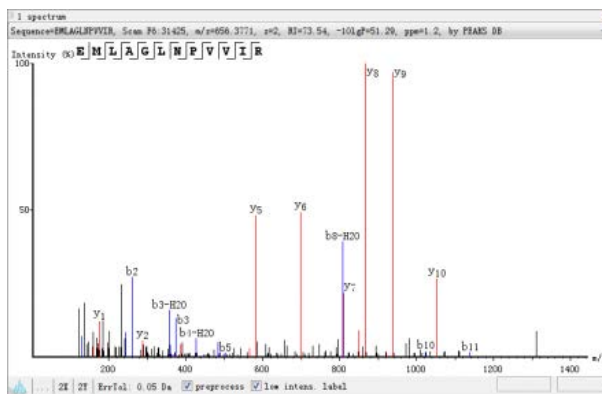

gi | 224104085

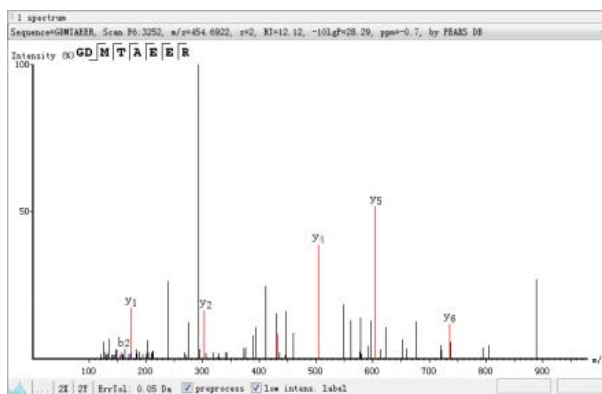

gi | 566206225

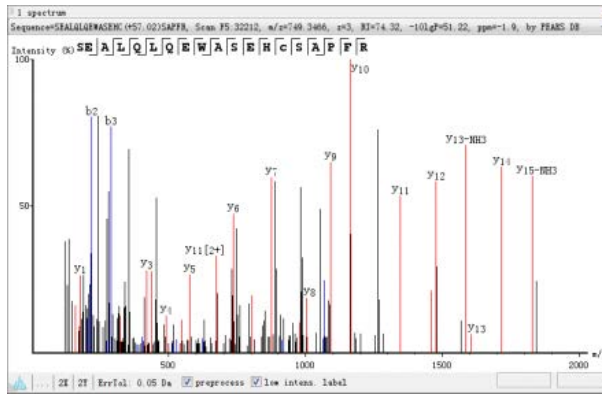

gi | 224108744

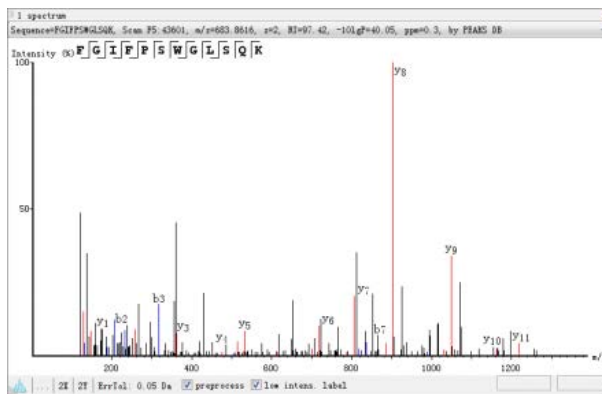

gi | 225437581

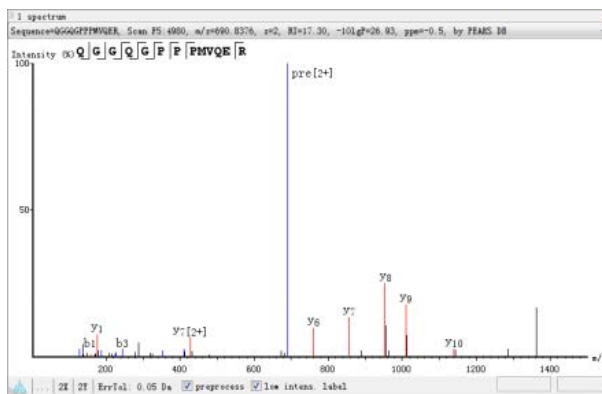

gi | 224062053

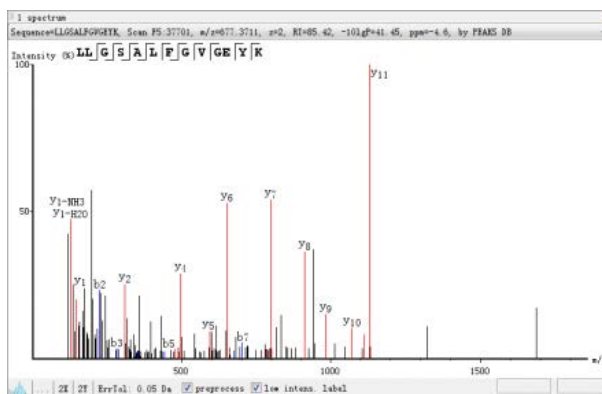



gi | 225430537

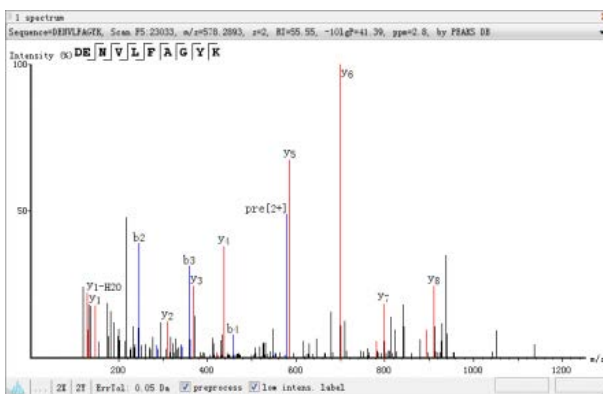

gi | 224117704

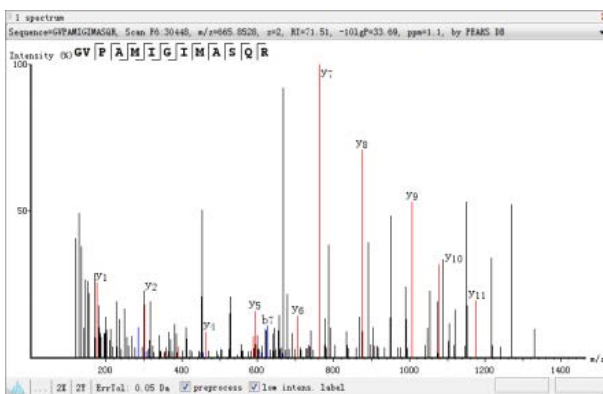

gi | 225435776

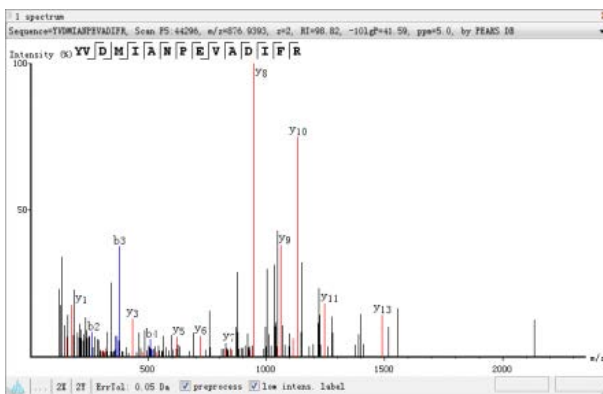

gi | 224118638

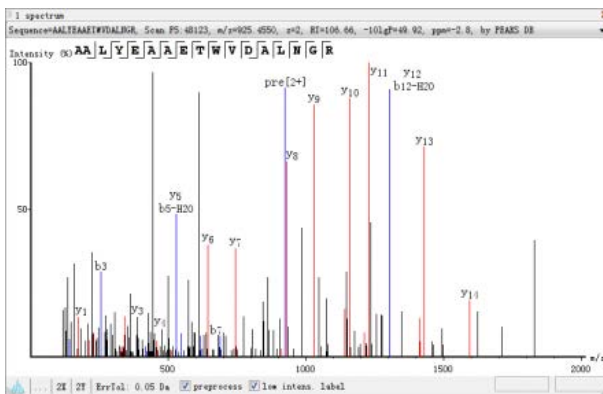

gi | 225436003

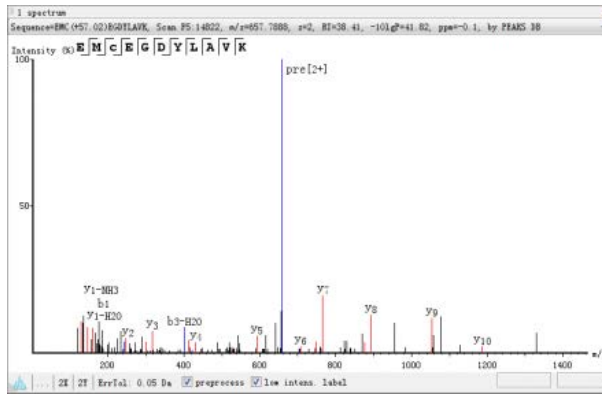

gi | 224099925

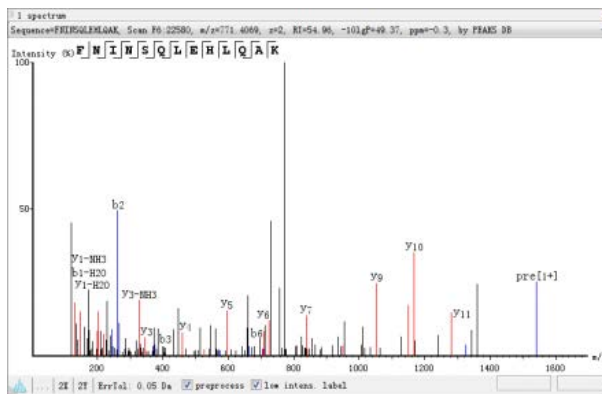

gi | 731394805

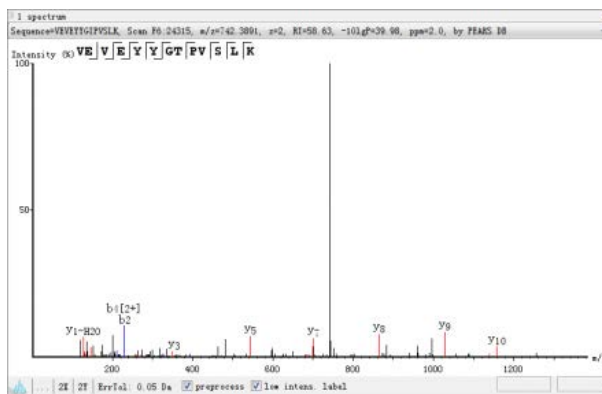

gi | 566151879

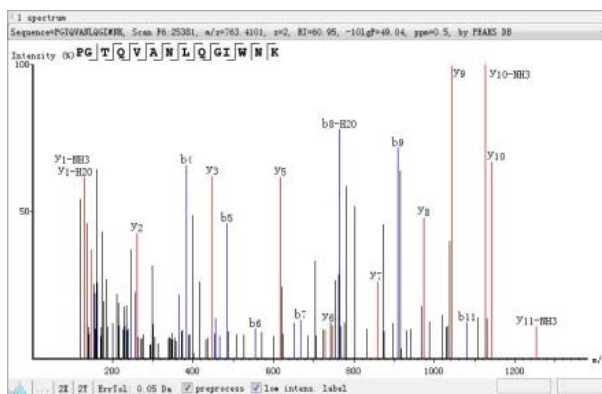

gi | 731392112

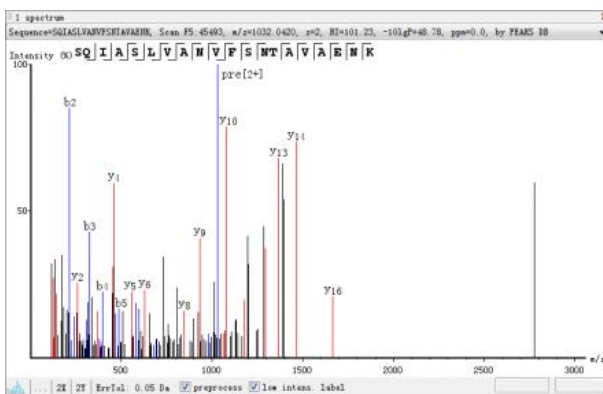

gi | 224055587

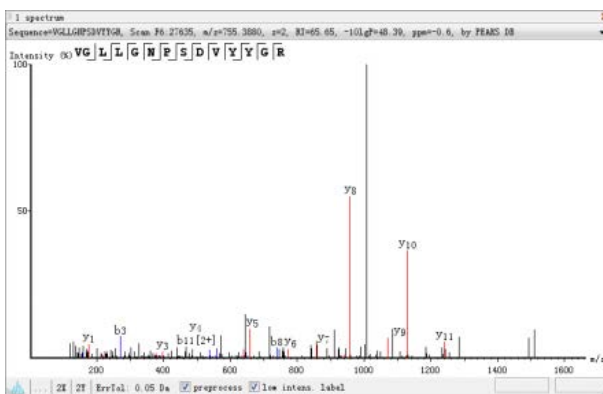

gi | 566182607

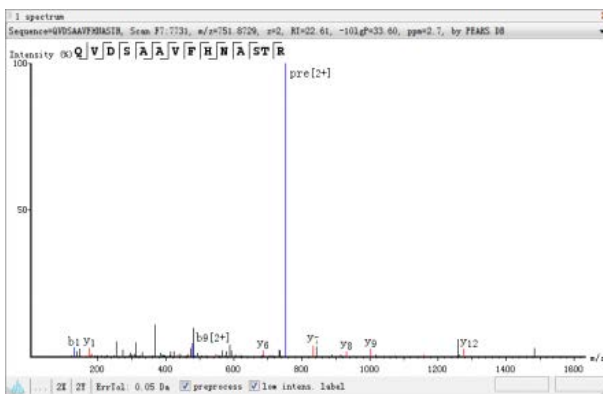

gi | 566150079

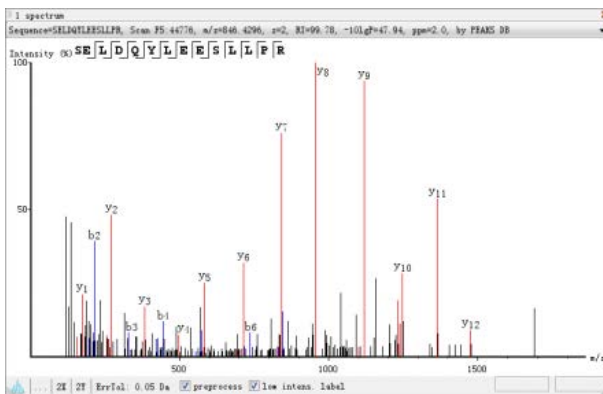

gi | 225424148

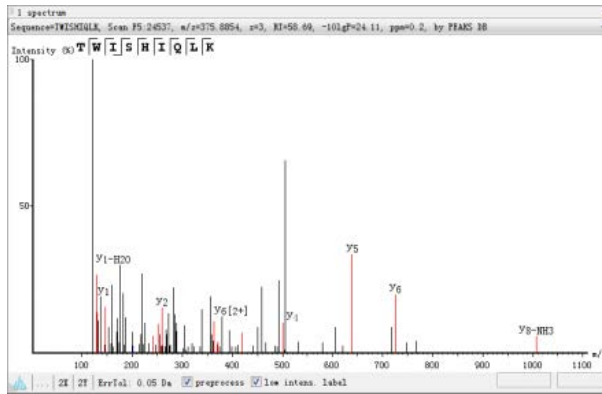

gi | 225452863

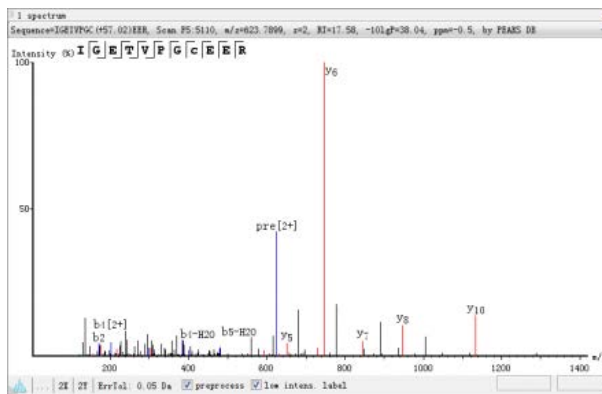

gi | 566155559

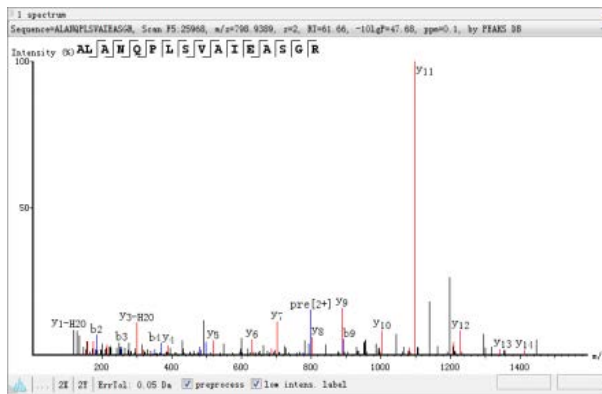

gi | 224077096

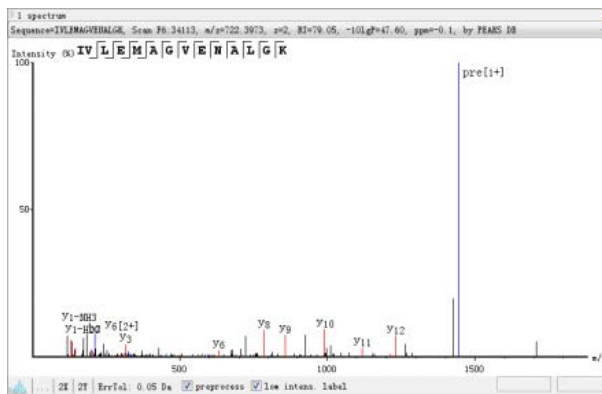

gi | 224146385

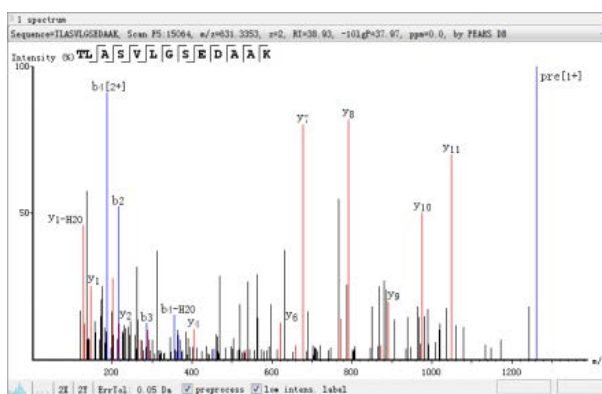

gi | 731422518

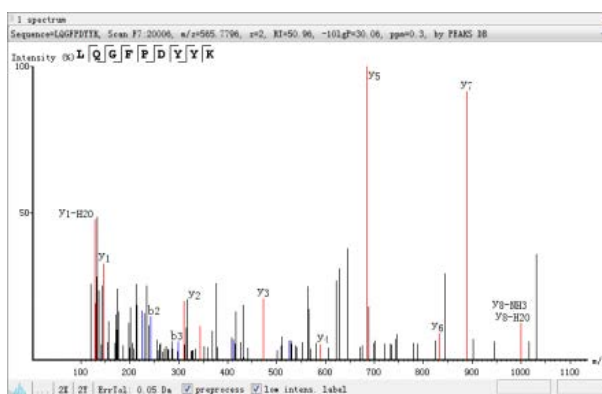

gi | 224094580

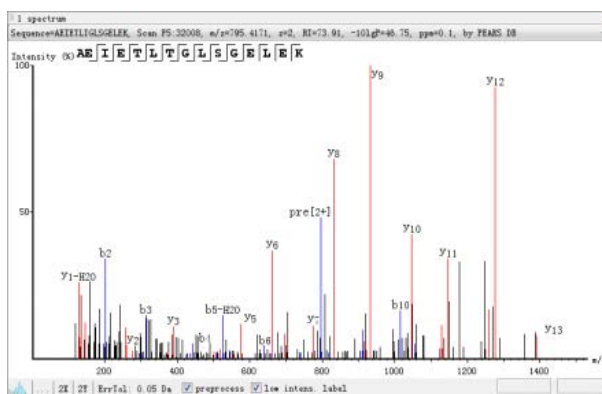

gi | 225458227

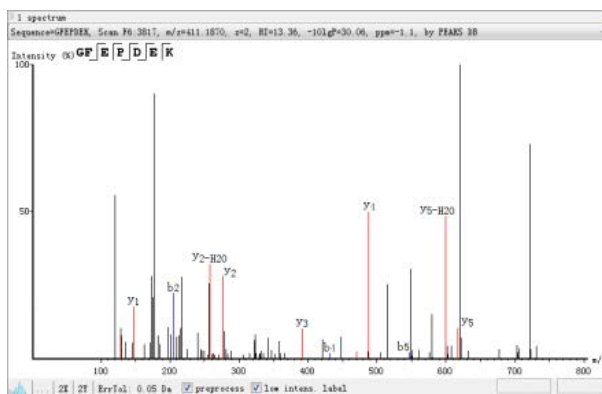

gi | 566206658

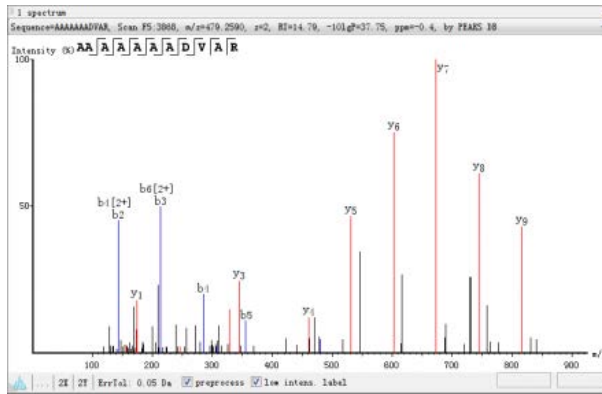

gi | 224098848

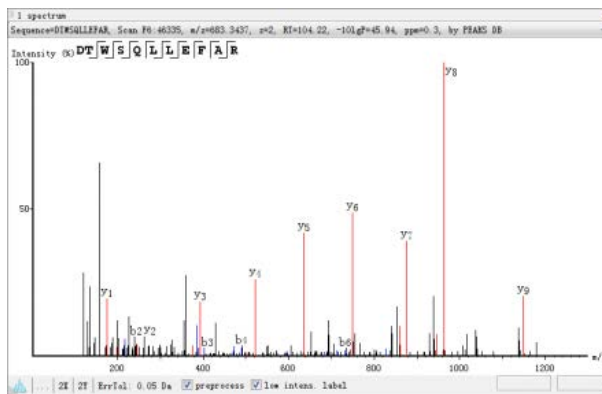

gi | 566210253

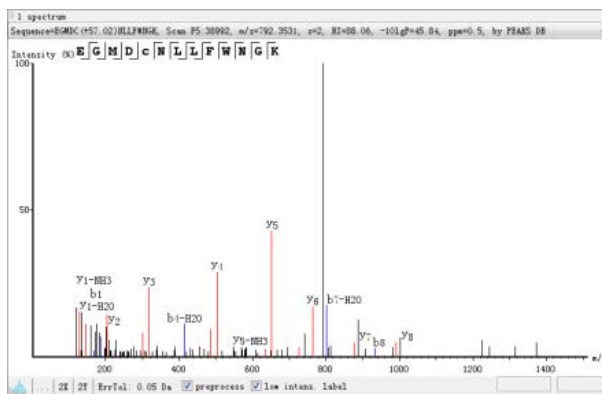

gi | 566193348

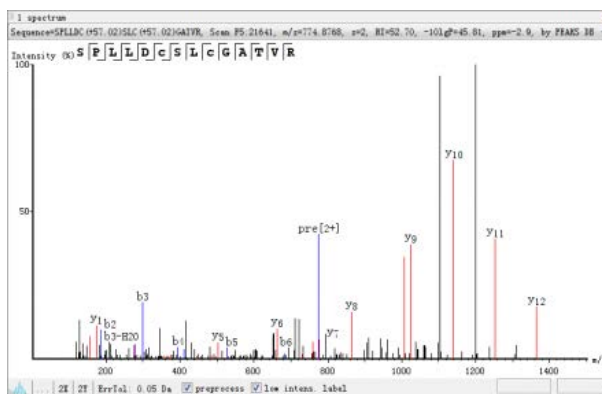

gi | 225437358

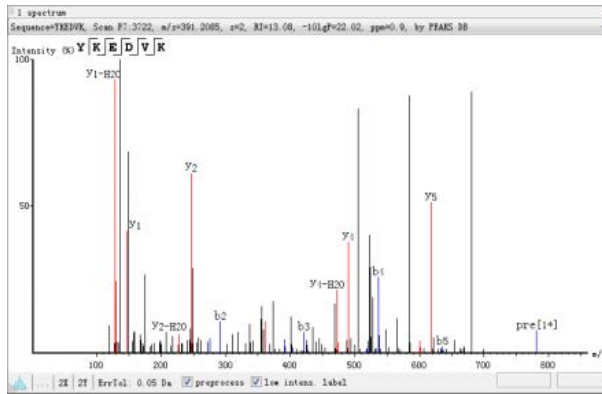

gi | 224118700

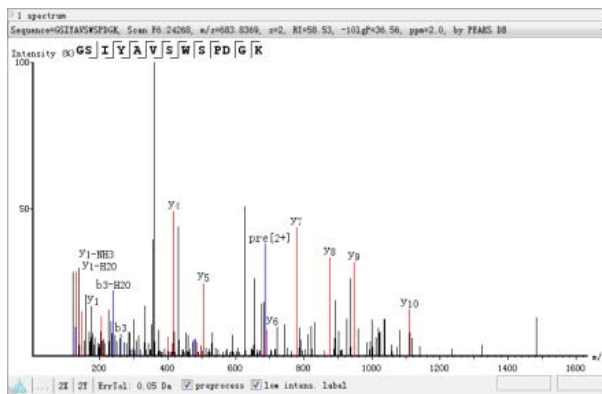

gi | 224079549

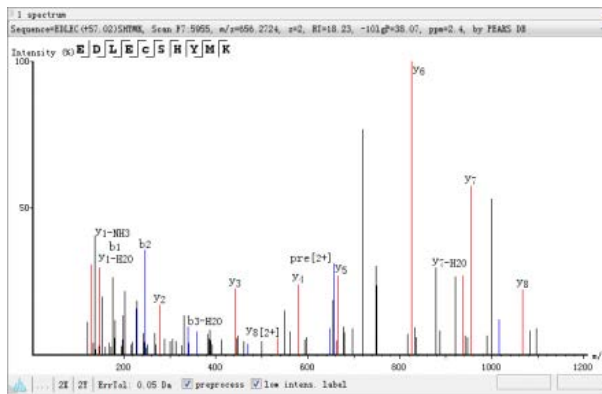

gi | 225456794

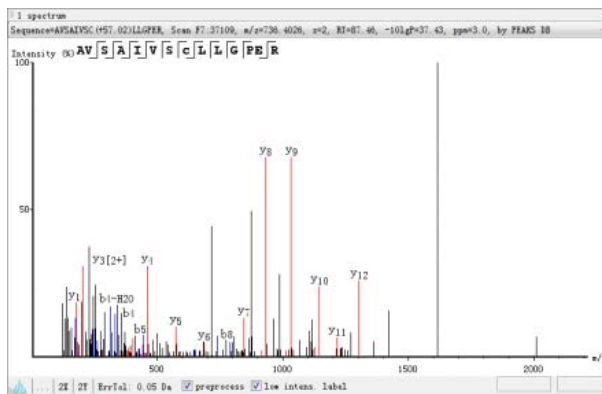

gi | 225444537

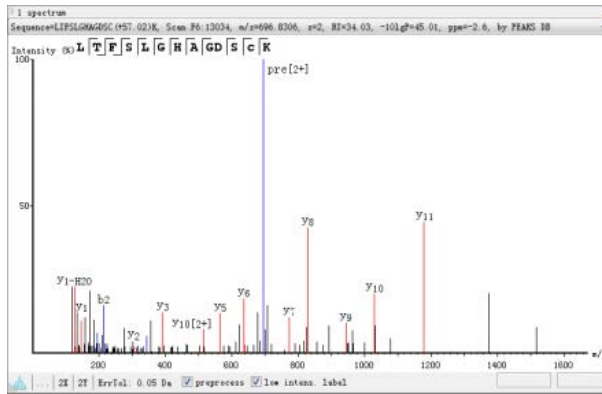

gi | 224064766

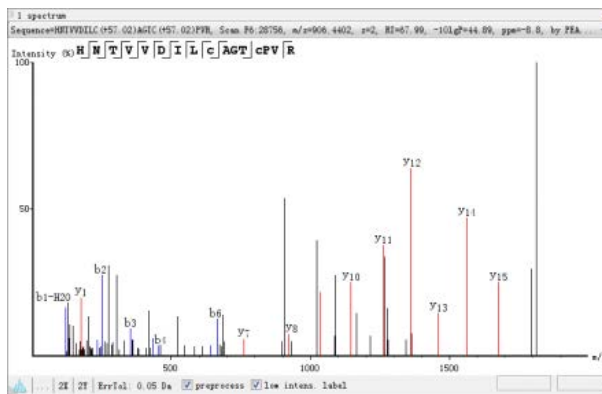

gi | 566179360

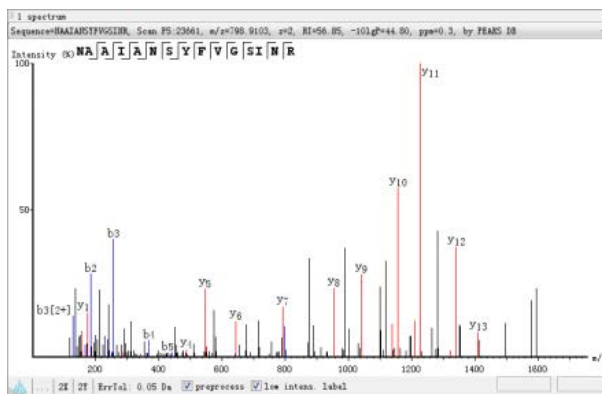

gi | 566189493

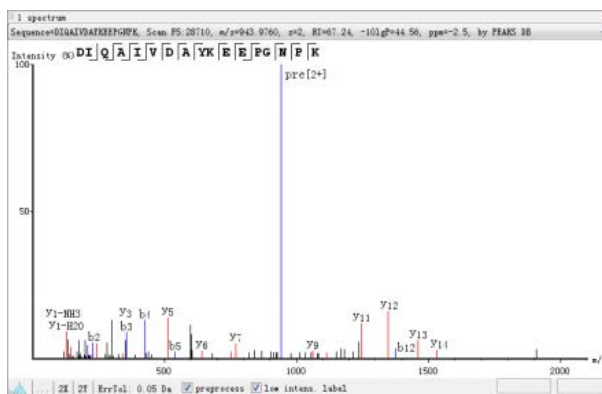



gi | 359490488

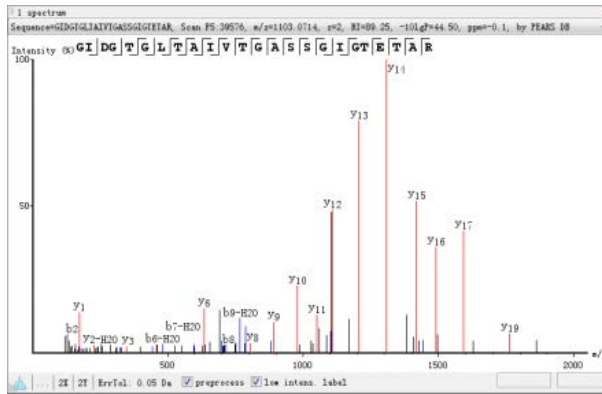

gi | 566183391

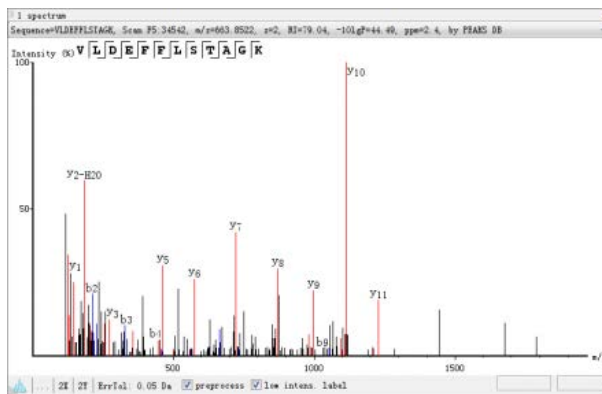

gi | 225429824

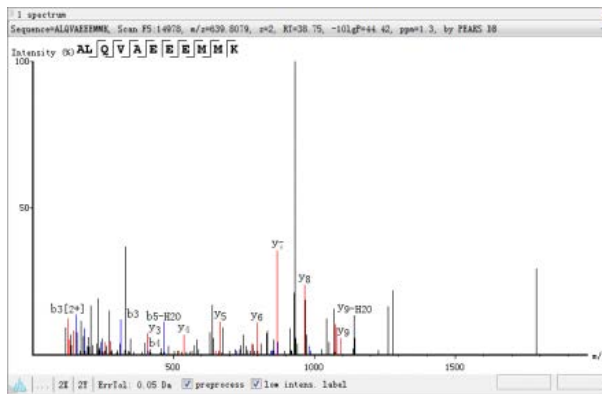

gi | 359487063

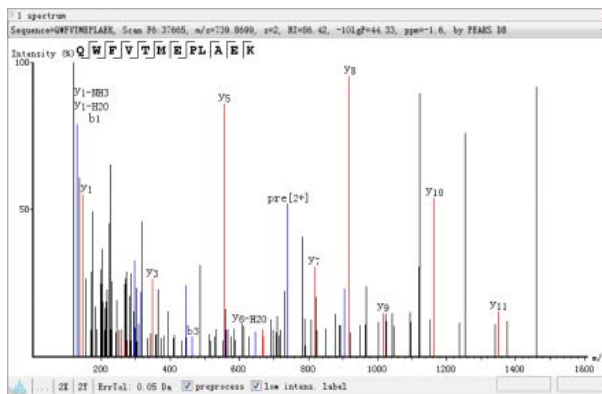

gi | 224103873

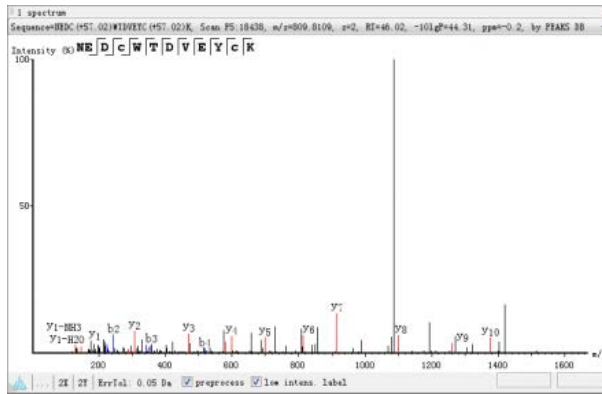

gi | 225443254

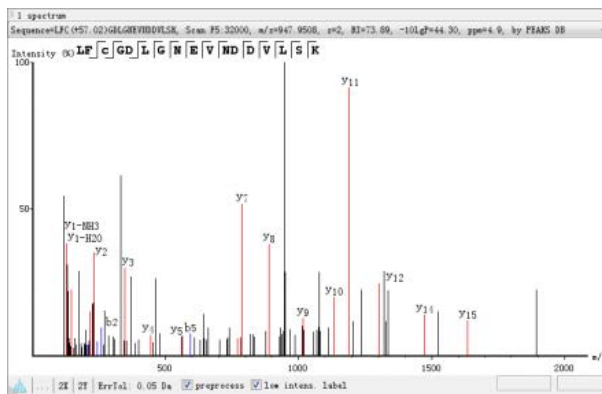

gi | 731386977

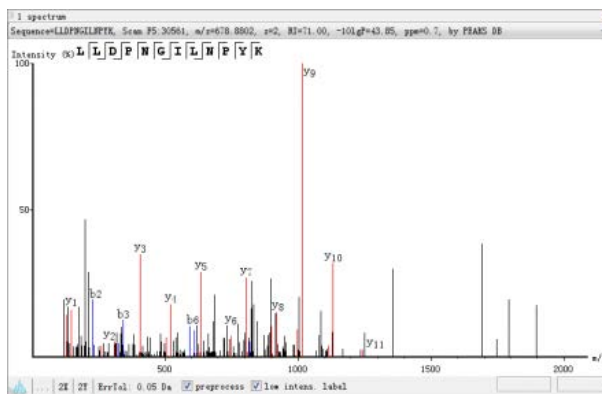

gi | 731389767

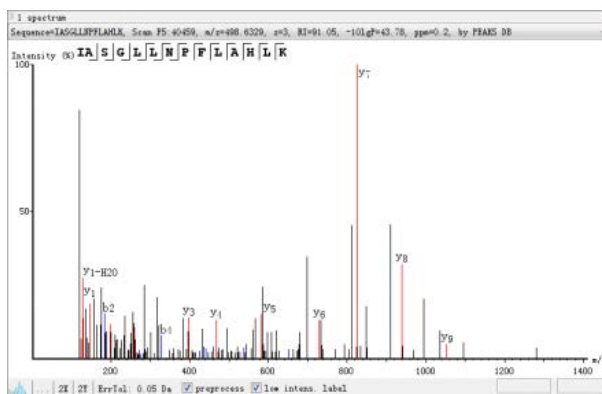

gi | 566161892

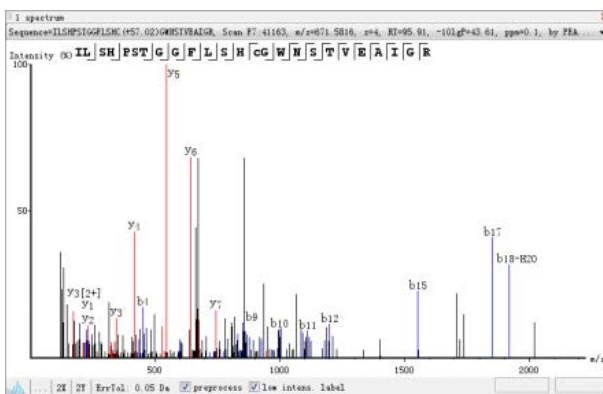

gi | 566173634

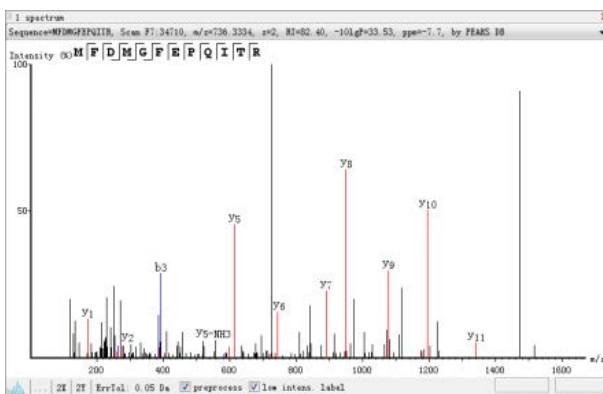

gi | 566213840

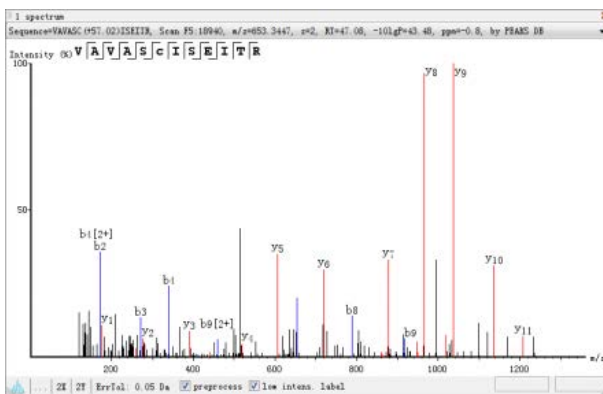

gi | 224085976

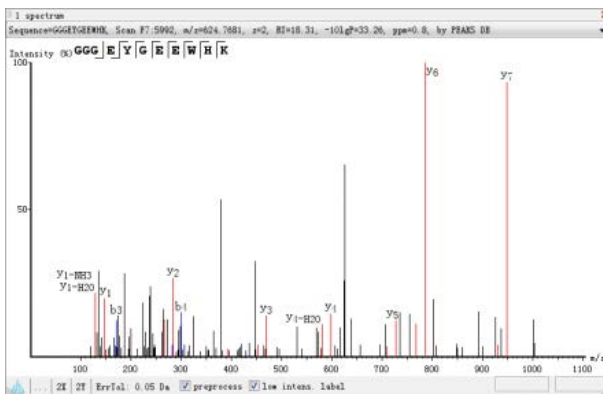

gi | 224100879

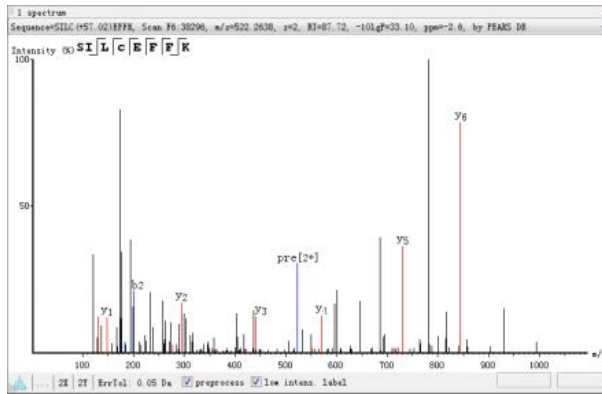

gi | 566157213

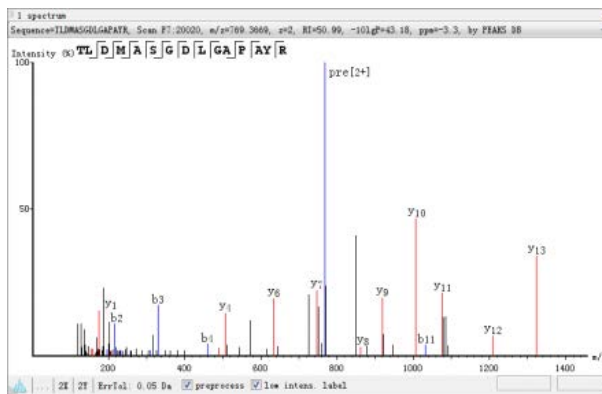

gi | 566154461

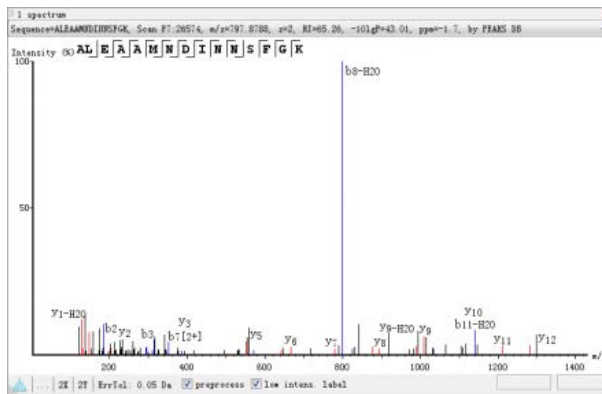

gi | 224109026

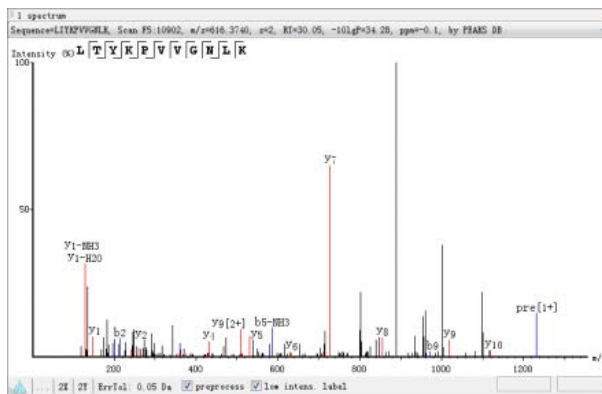

gi | 566152935

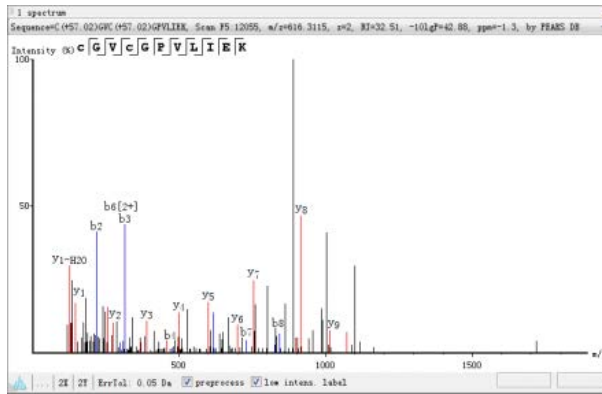

gi | 225458607

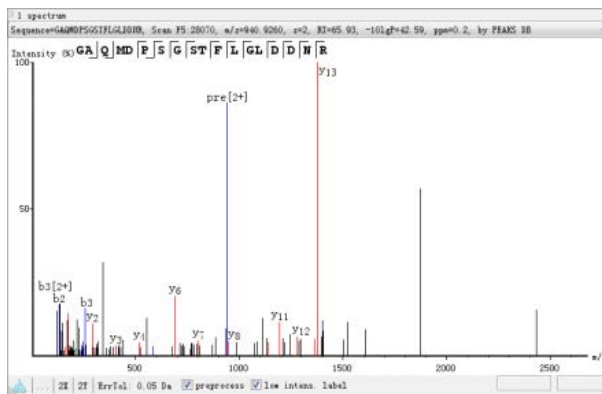

gi | 224078604

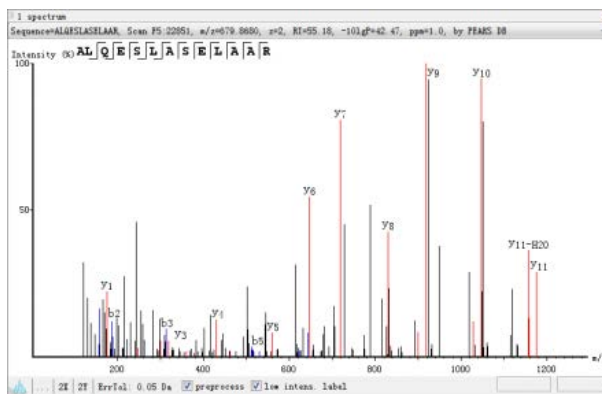

gi | 566147174

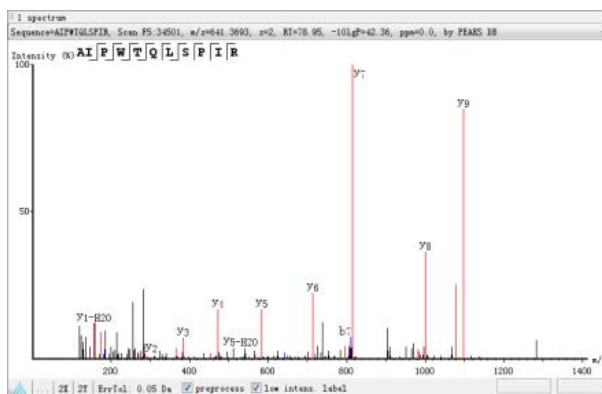

gi | 224145402

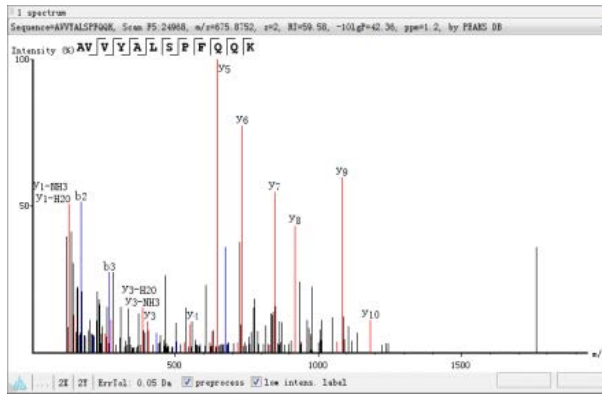

gi | 225459538

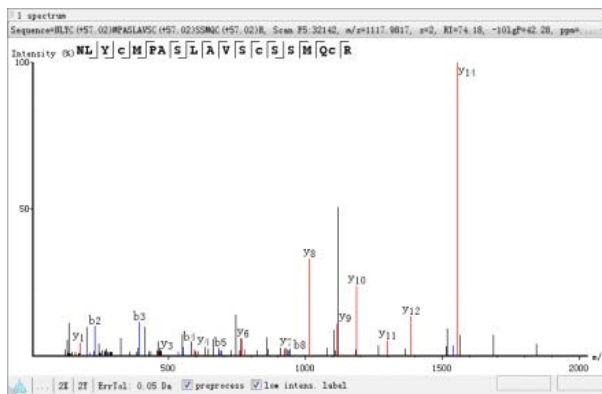

gi | 731399255

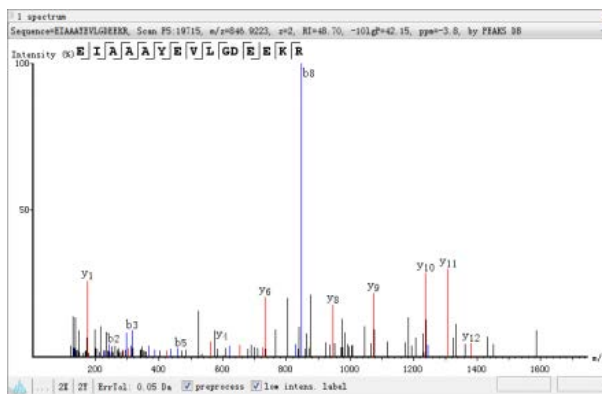

gi | 731433331

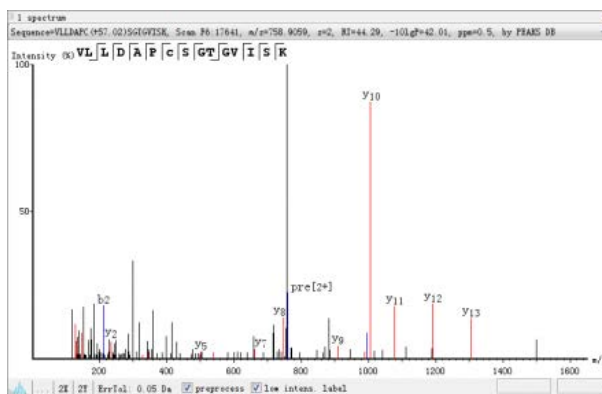

gi | 731417029

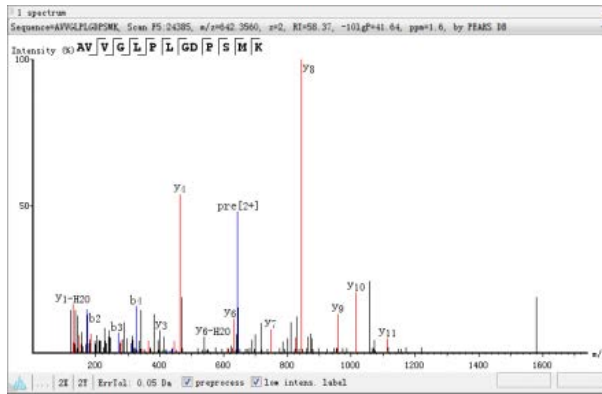

gi | 224120424

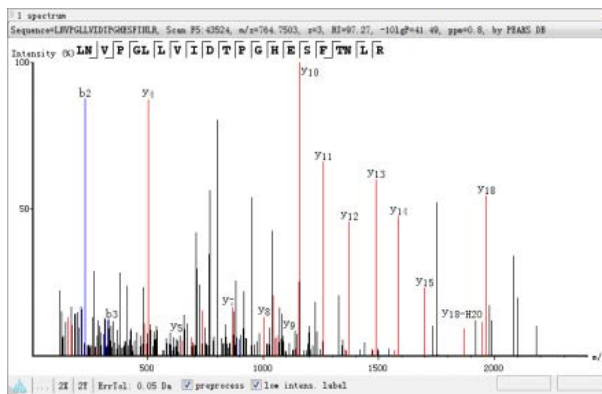

gi | 731420110

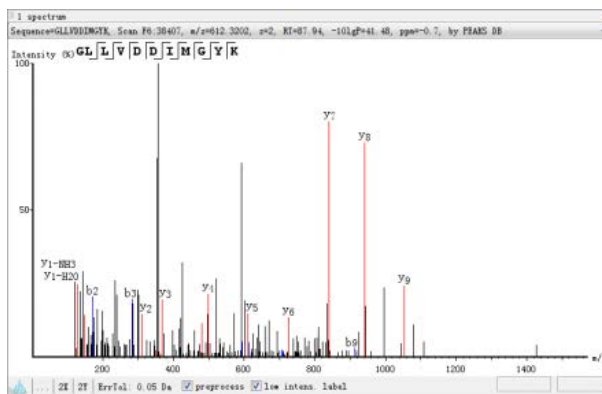

gi | 225450051

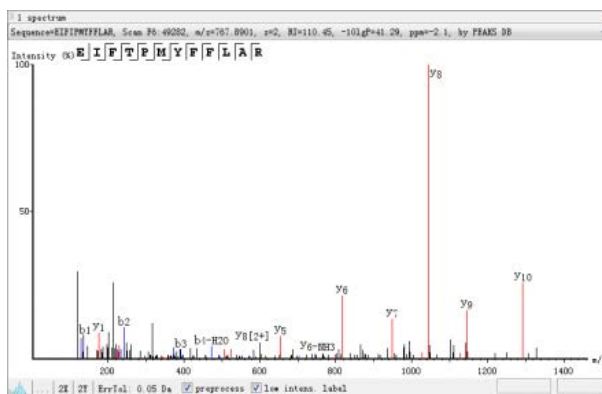

gi | 566192632

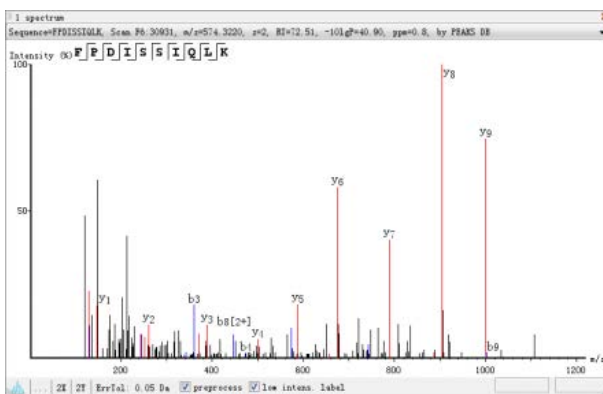

gi | 731427762

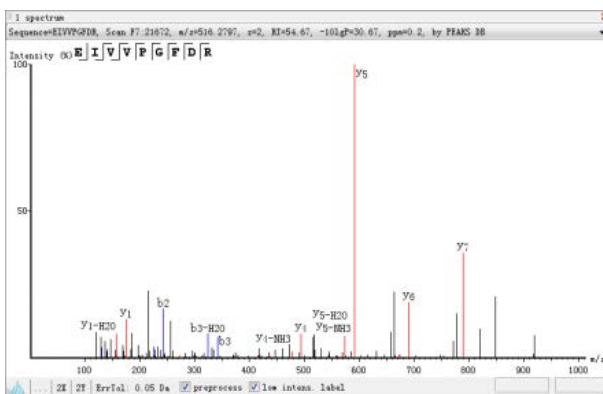

gi | 224115158

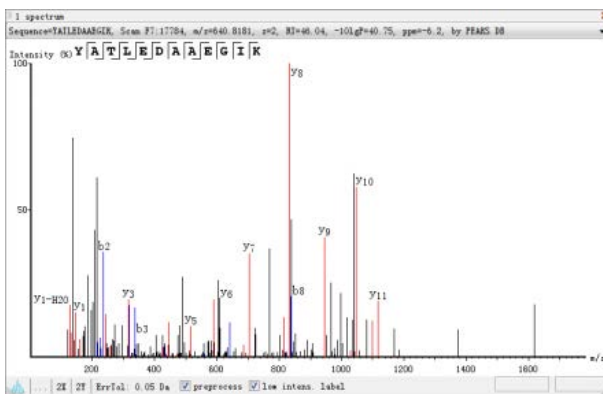

gi | 566214148

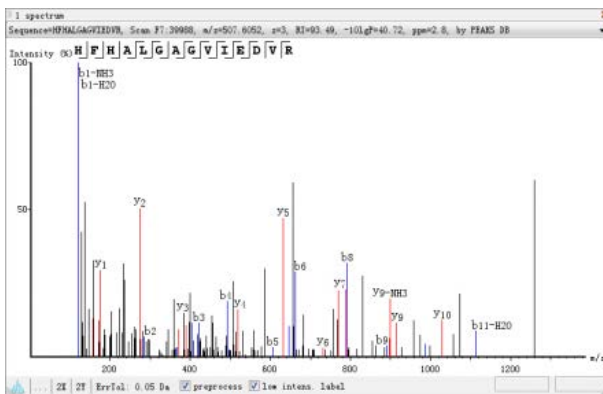



gi | 225436041

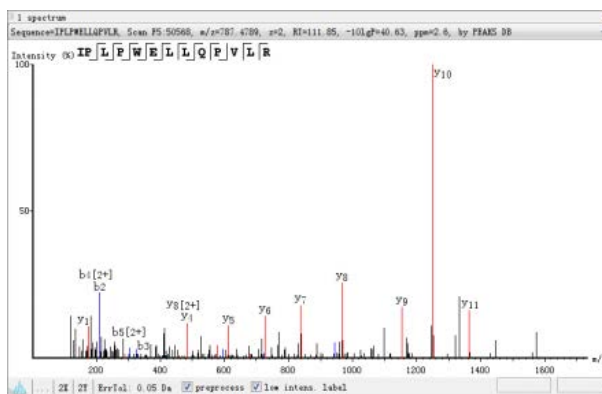

gi | 731425417

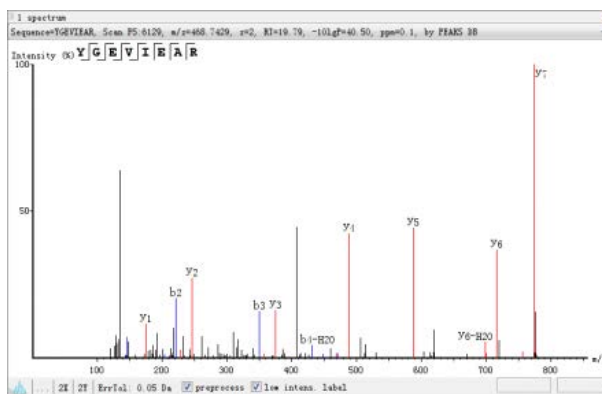

gi | 731386510

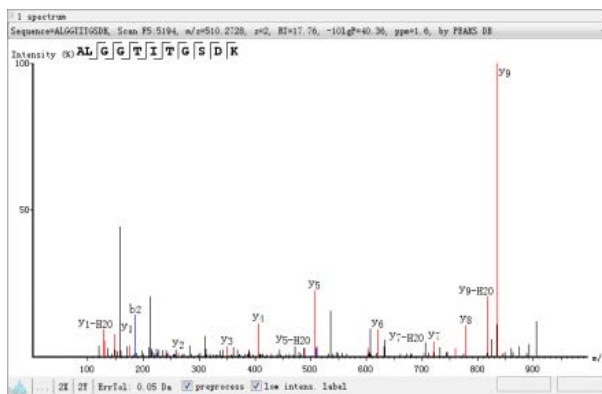

gi | 566215395

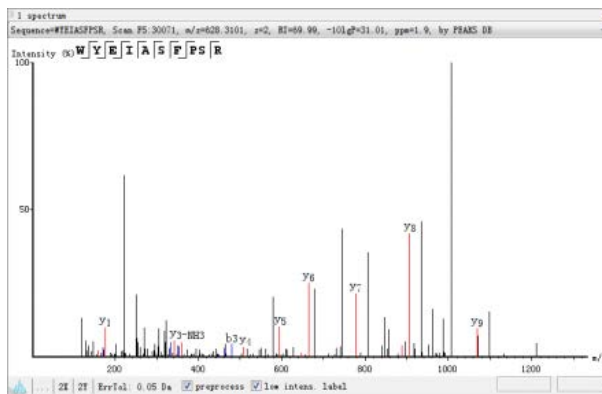

gi | 566155359

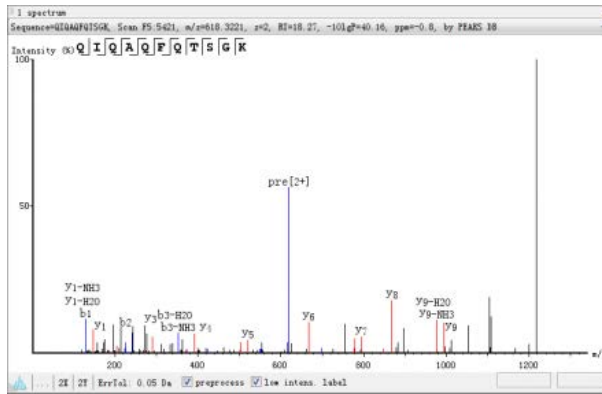

gi | 731428902

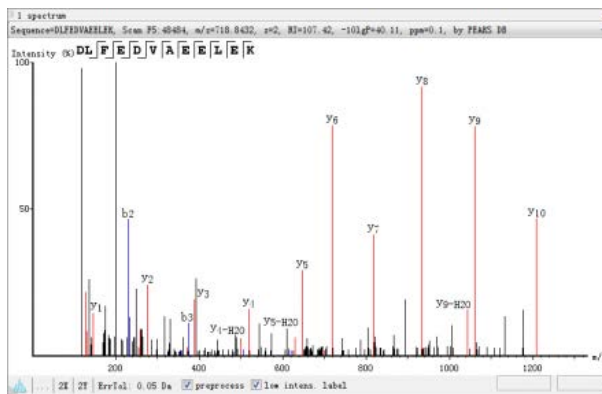

gi | 225456479

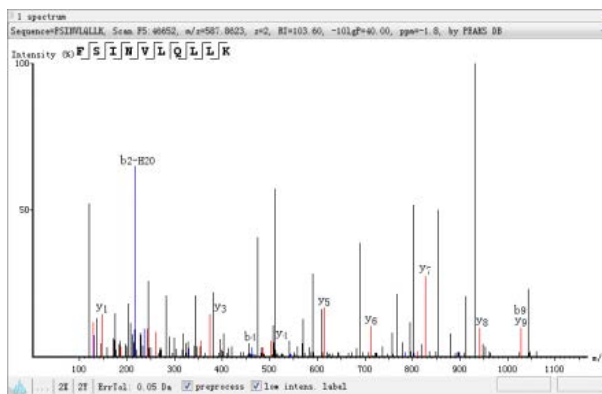

gi | 731438931

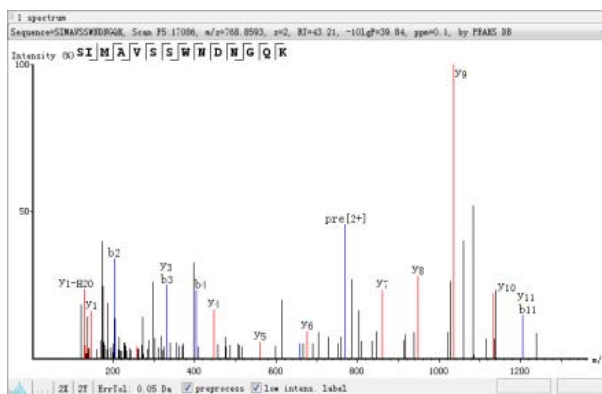

gi | 225457574

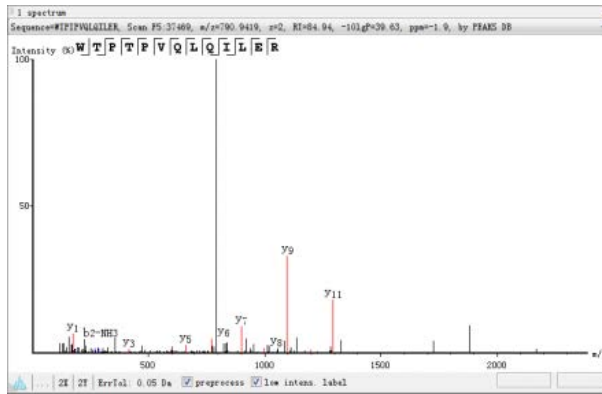

gi | 225446724

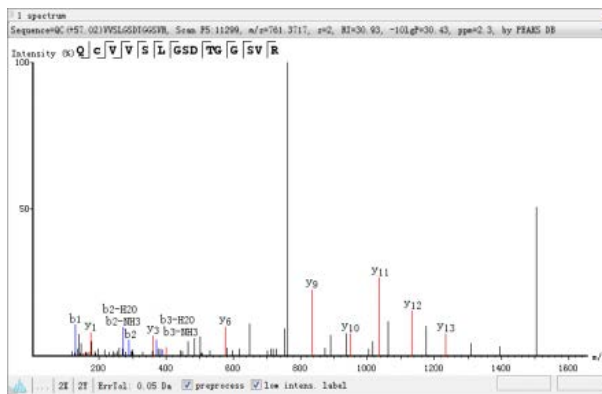

gi | 566202901

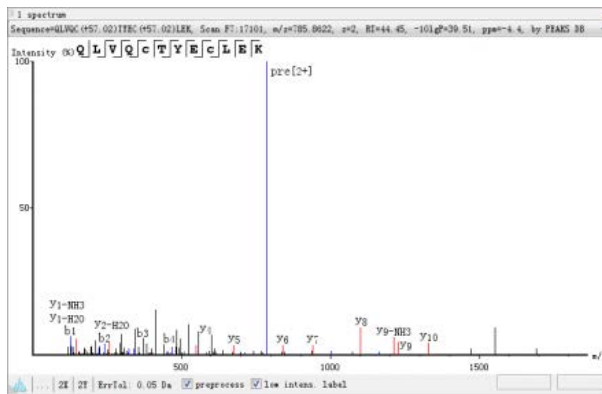

gi | 731430482

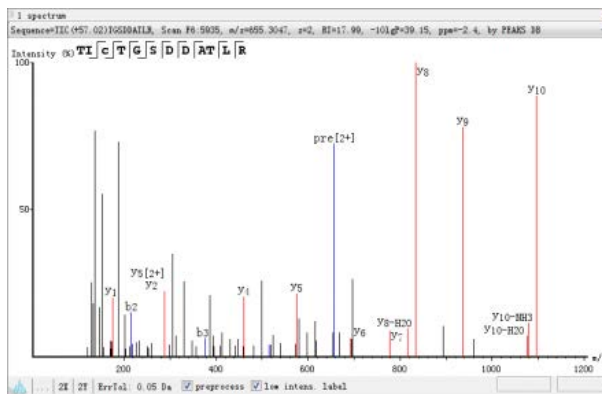

gi | 224137970

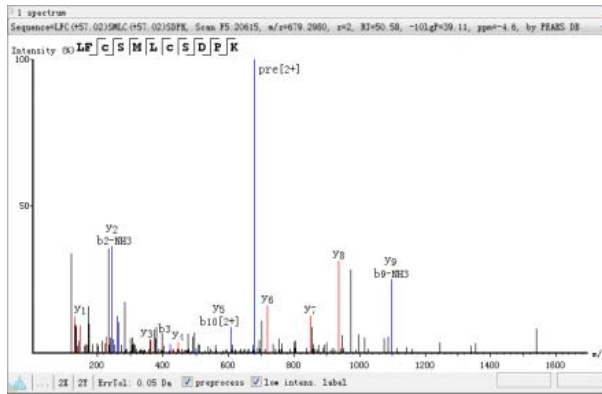

gi | 225459083

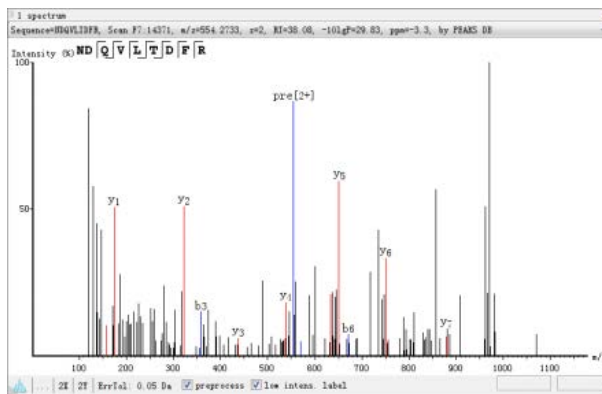

gi | 225426544

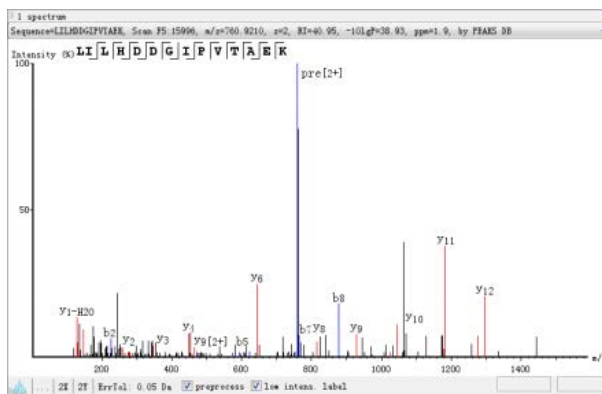

gi | 224066789

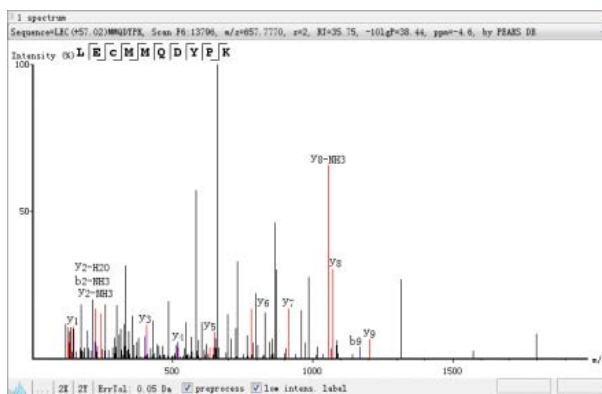

gi | 566174766

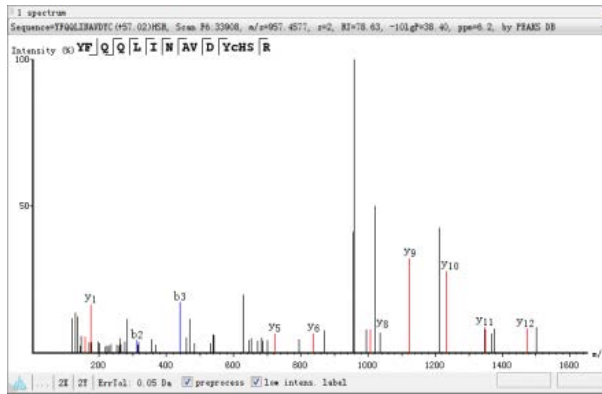

gi | 224126789

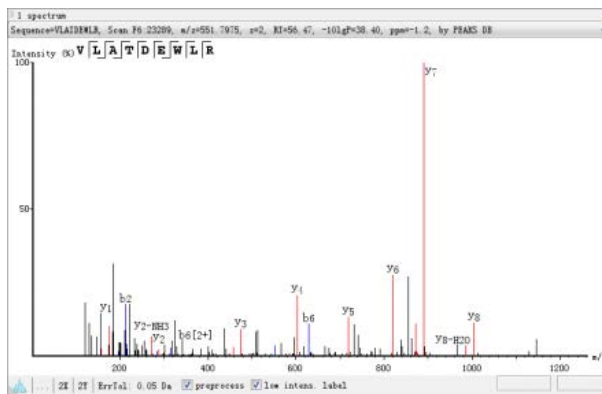

gi | 225428560

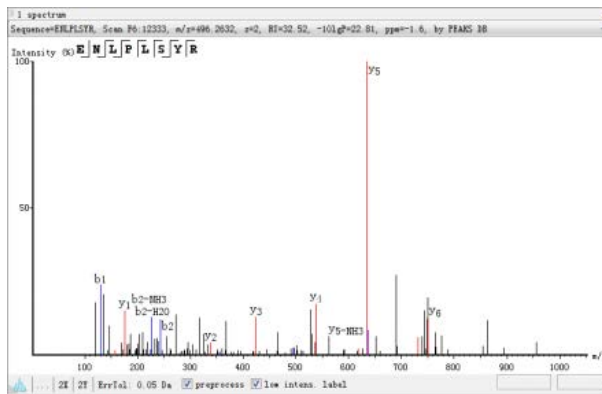

gi | 731406152

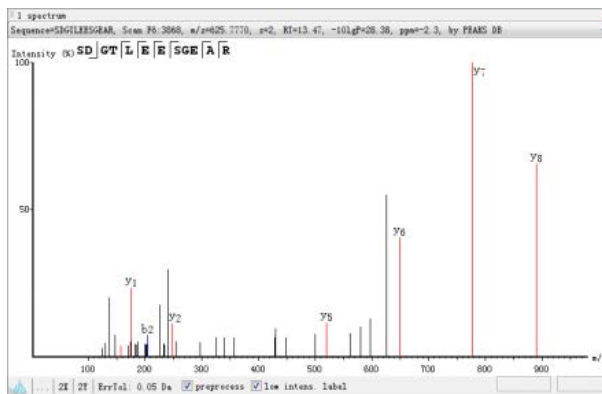

gi | 225459530

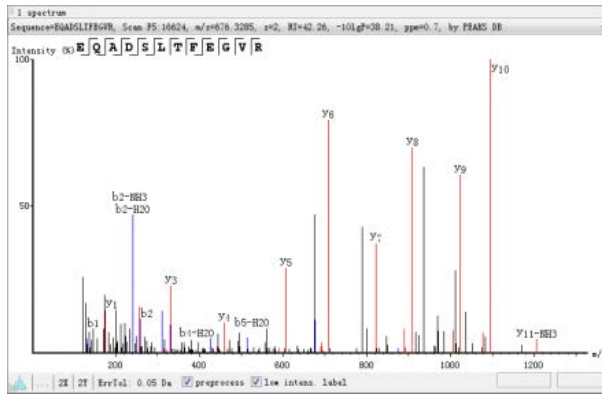

gi | 225424272

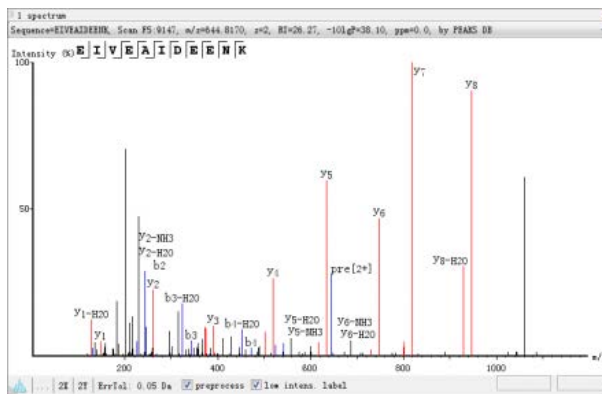

gi | 224073306

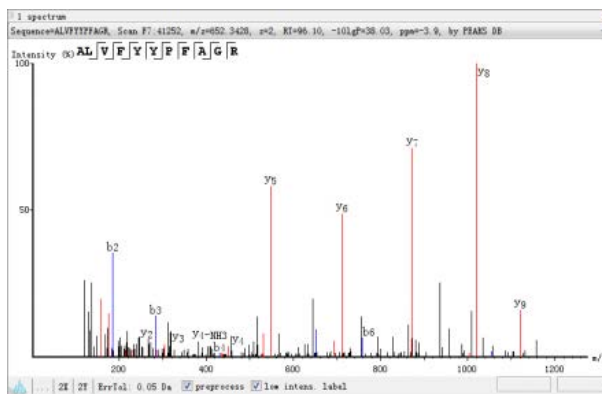

gi | 225435429

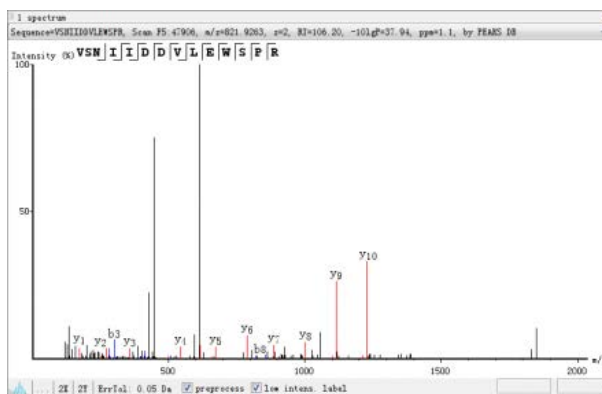

gi | 359475077

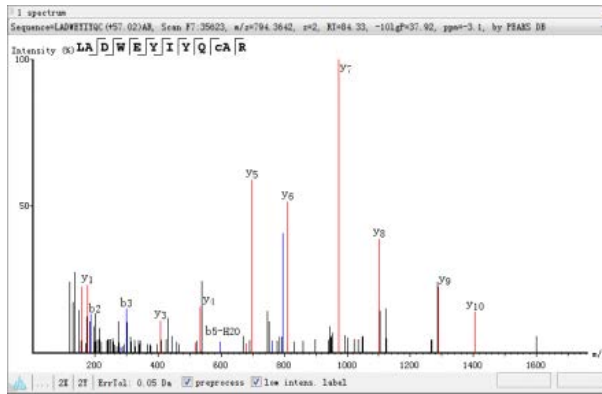

gi | 566205509

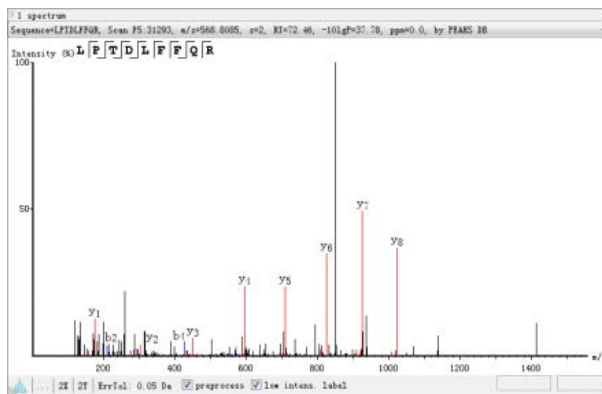

gi | 225436347

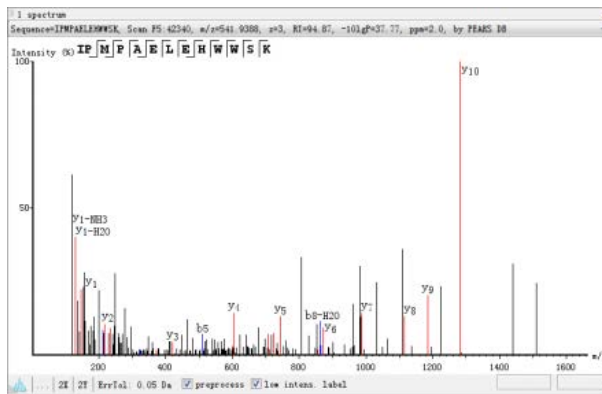

gi | 566176657

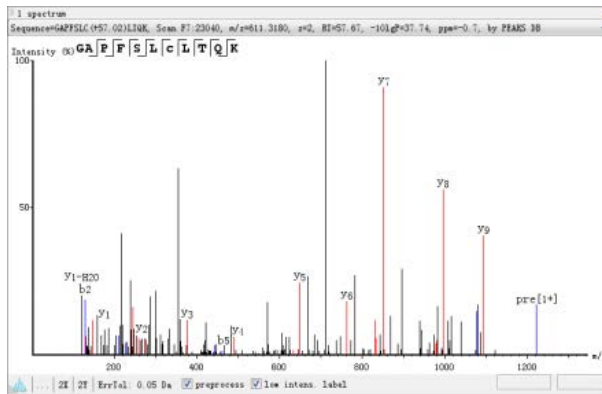

gi | 566211614

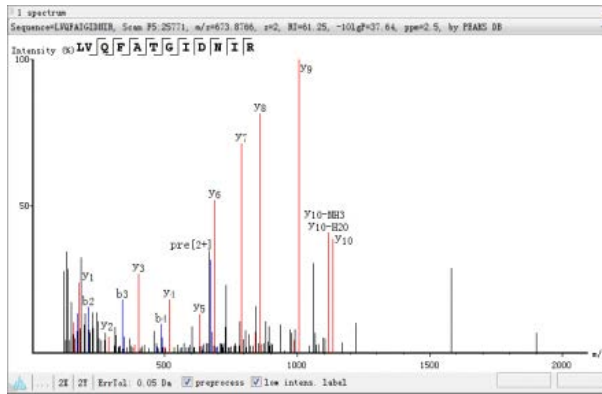

gi | 566168047

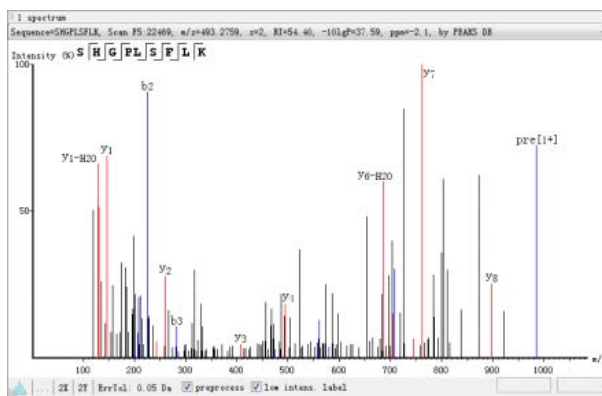

gi | 731436255

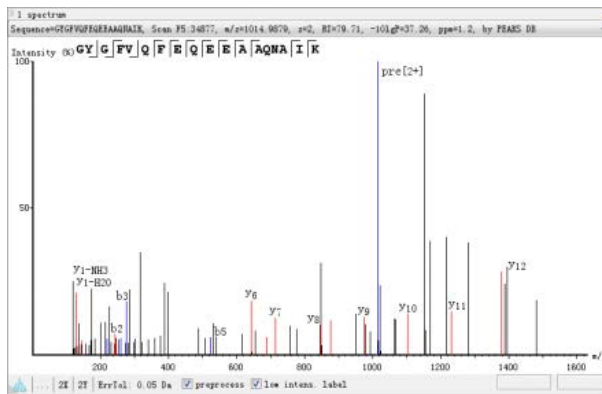

gi | 225447488

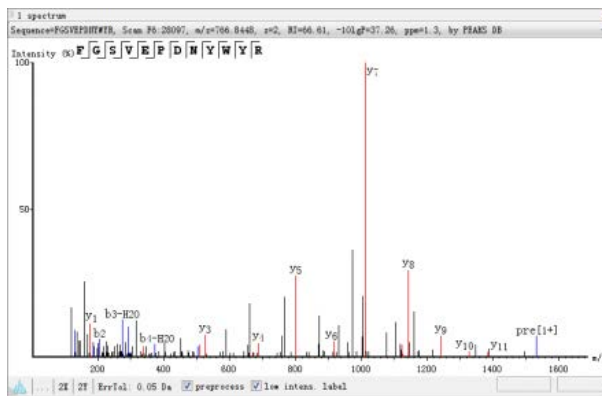



gi | 224142329

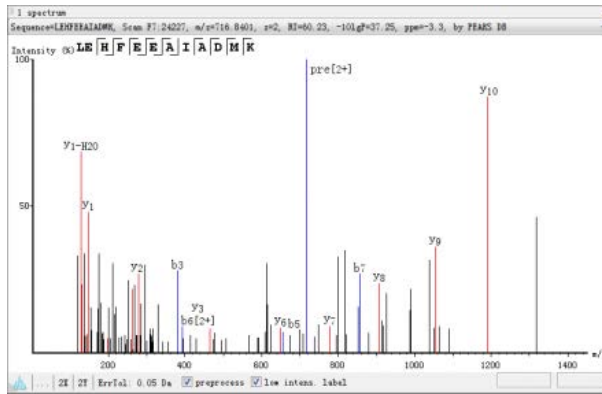

gi | 225429195

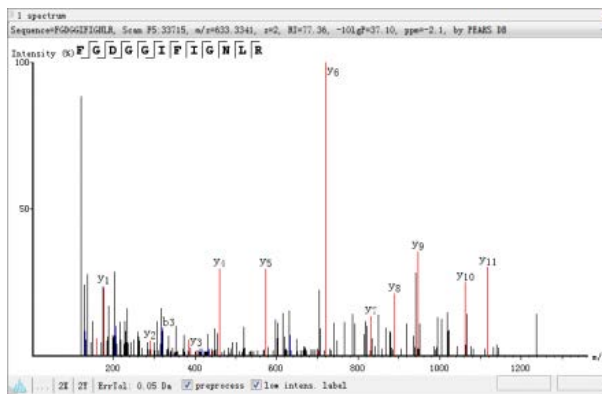

gi | 225431489

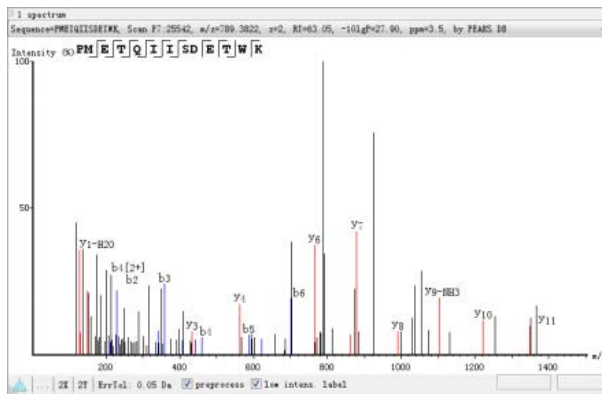

gi | 731393379

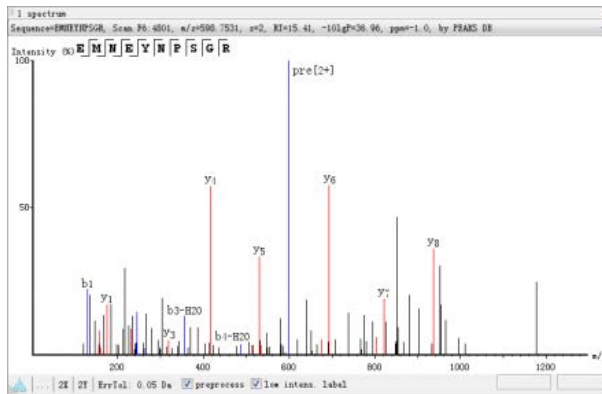

gi | 224090669

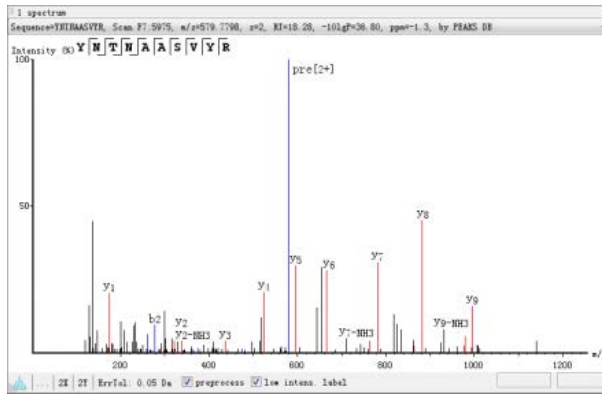

gi | 224114830

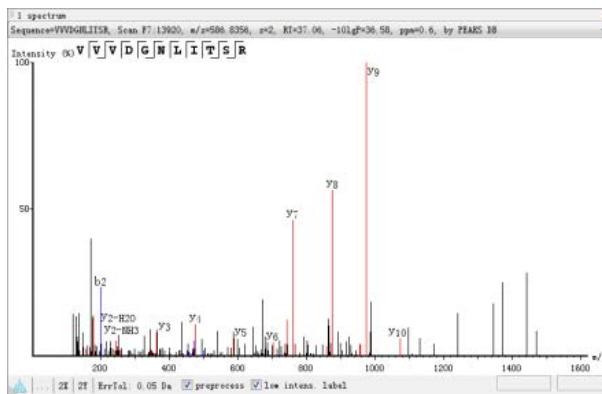

gi | 566156450

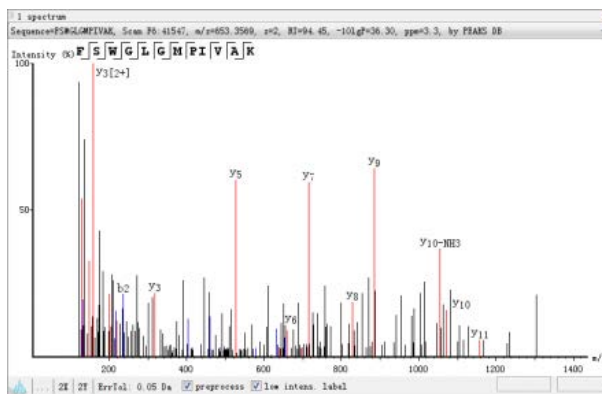

gi | 225469438

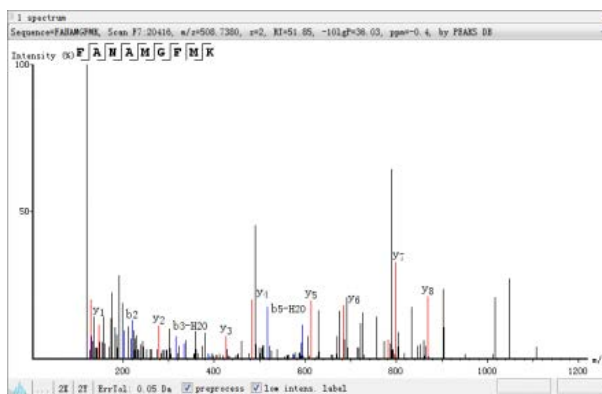

gi | 731397495

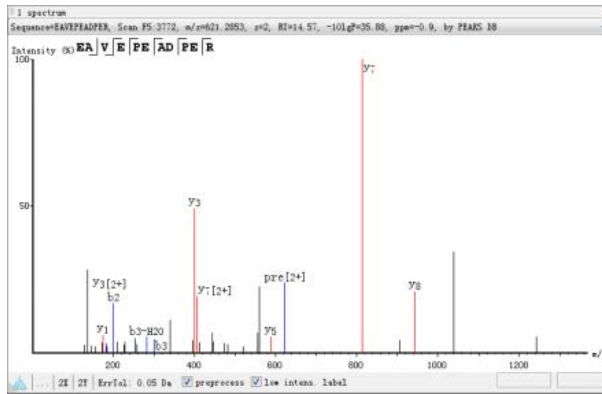

gi | 225442841

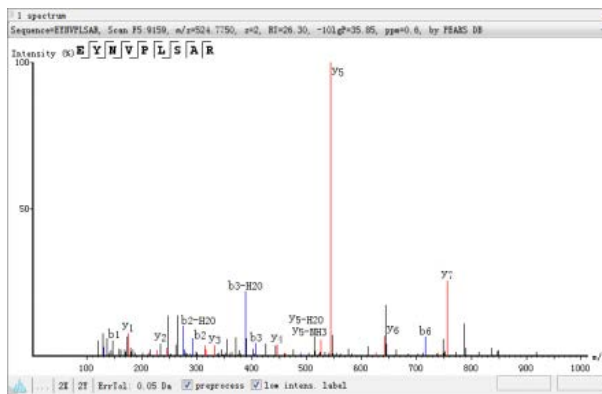

gi | 731395888

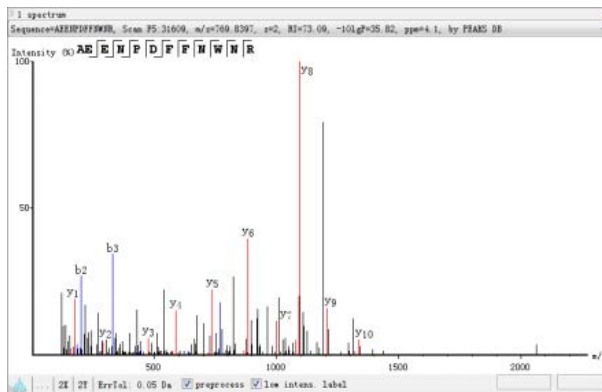

gi | 566160273

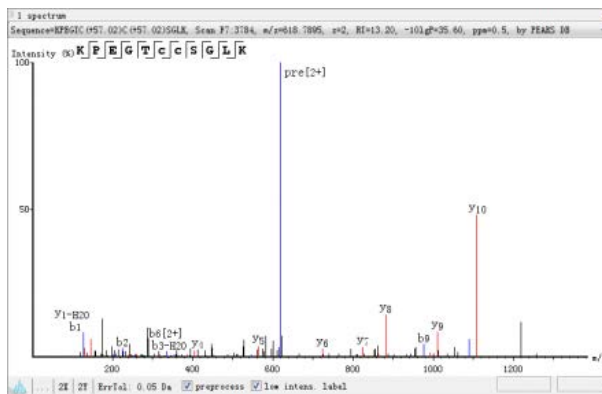

gi | 225470348

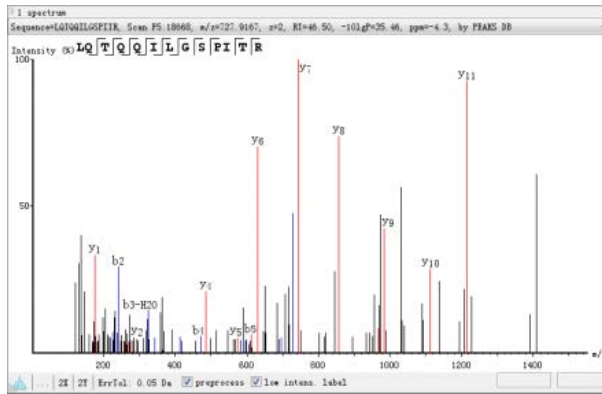

gi | 225430161

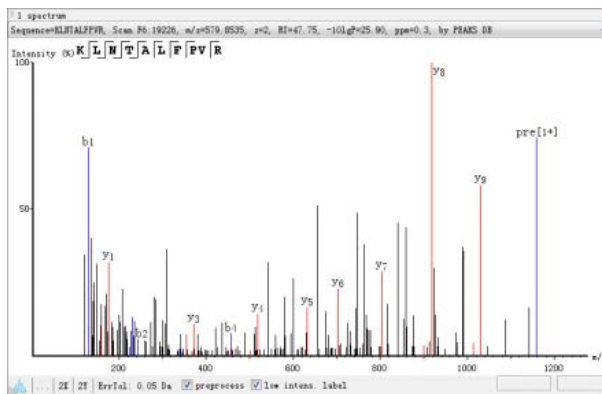

gi | 731383801

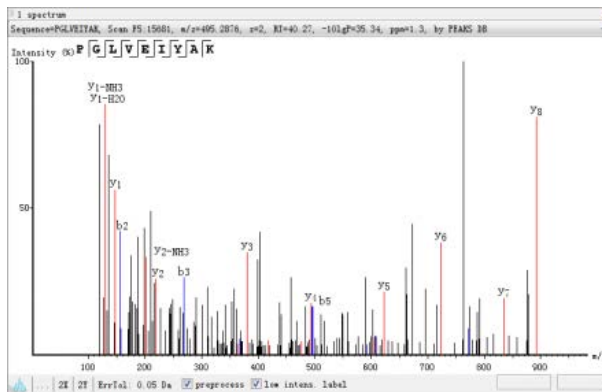

gi | 731383208

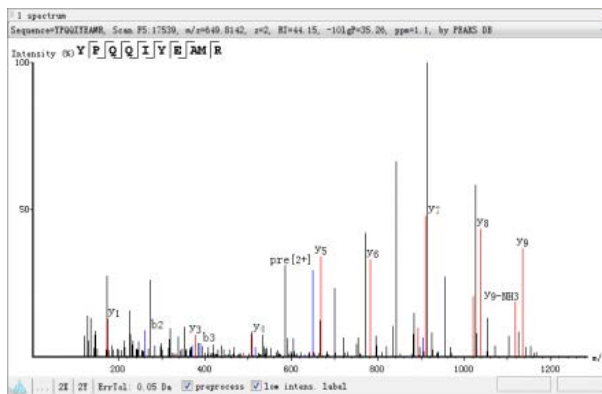

gi | 359475014

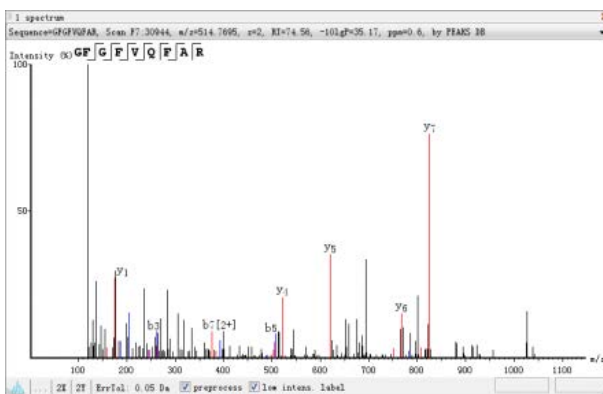

gi | 566214618

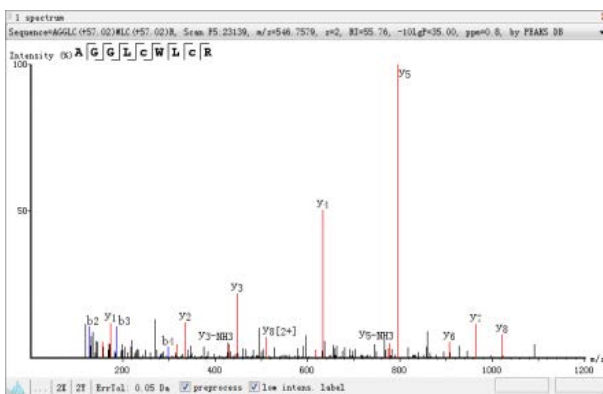

gi | 225462062

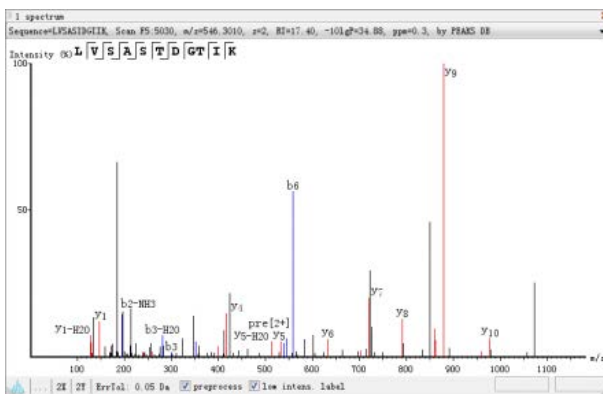

gi | 224062736

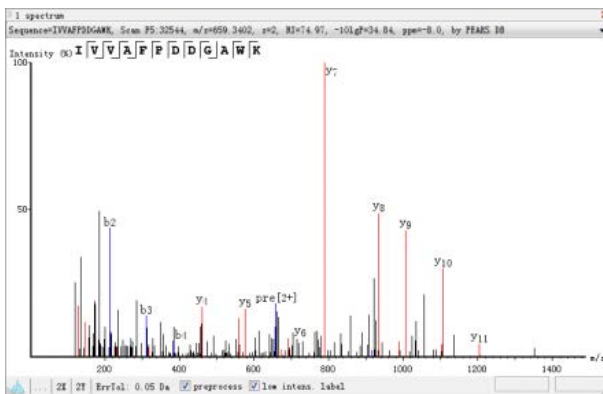

gi | 225444159

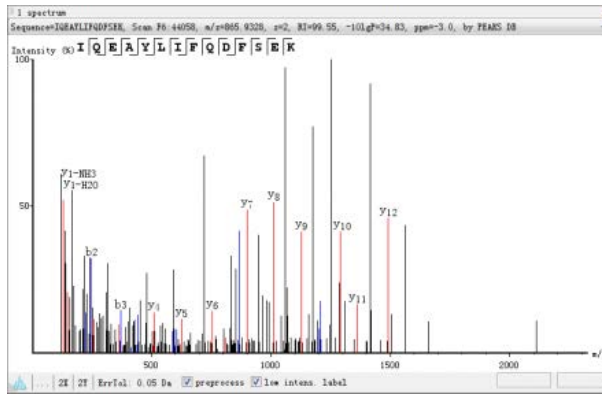

gi | 225447221

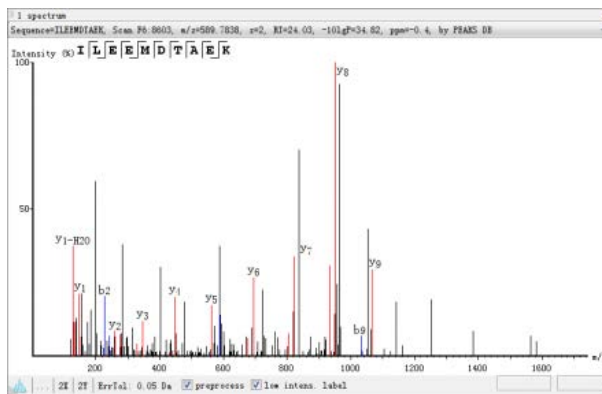

gi | 225467859

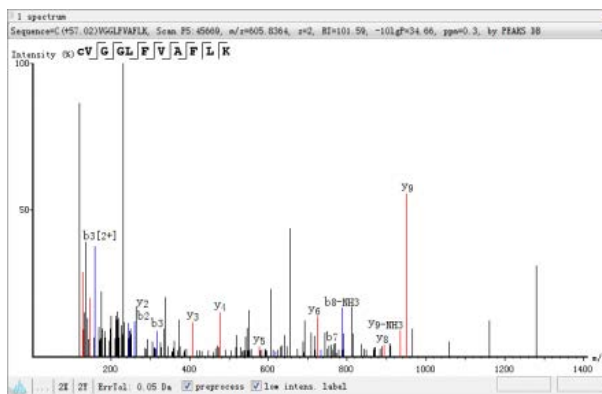

gi | 225451663

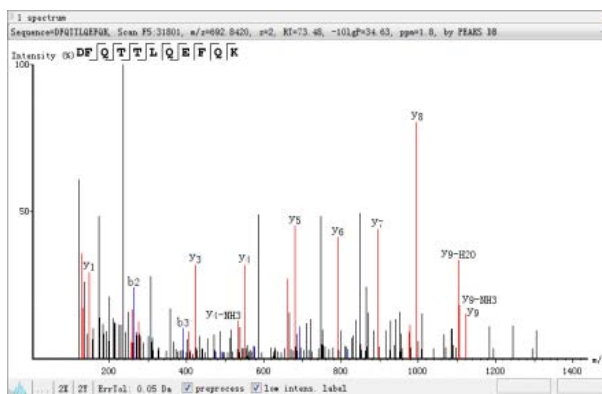

gi | 225445842

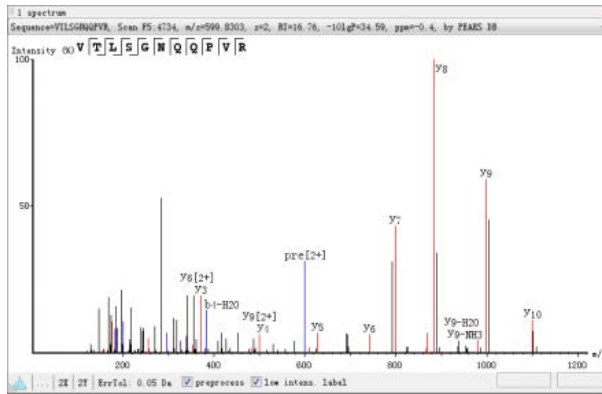

gi | 566187444

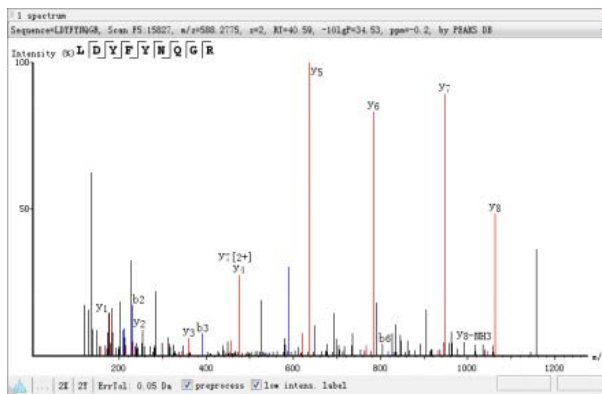

gi | 566209115

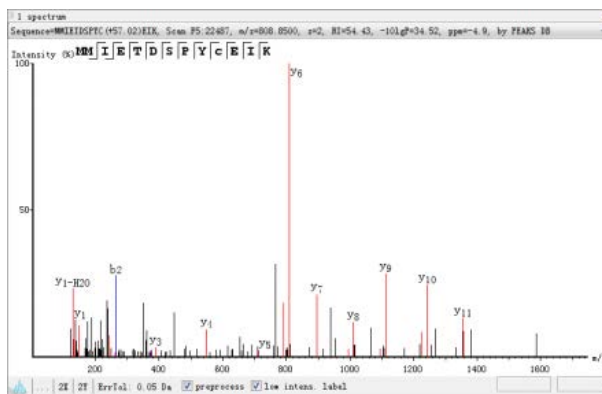

gi | 566195508

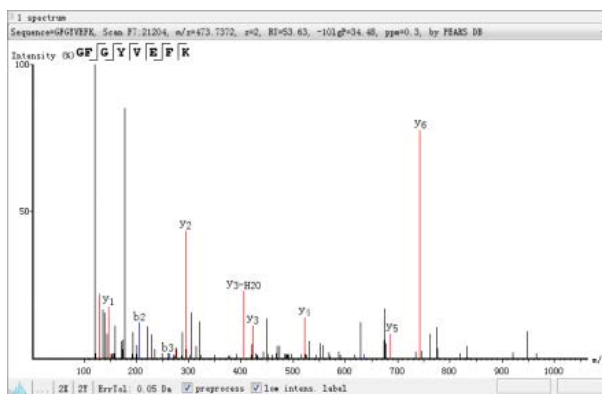

gi | 224067716

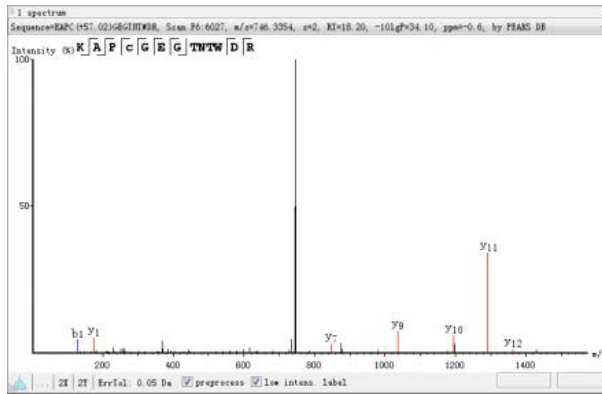

gi | 566155545

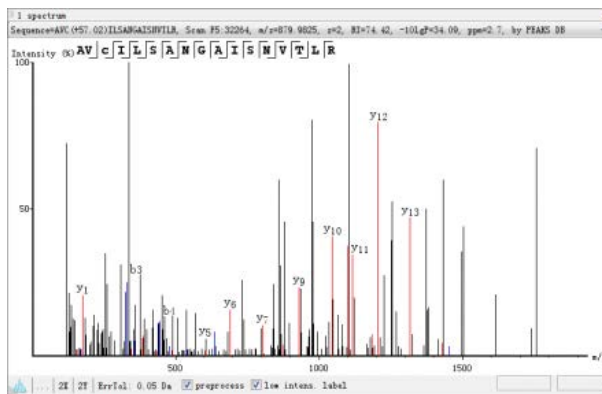

gi | 566209274

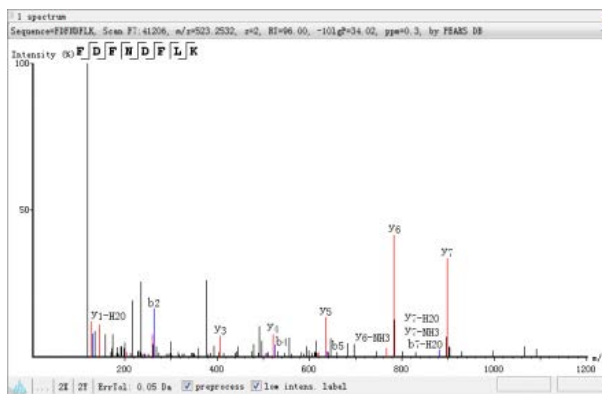

gi | 225443988

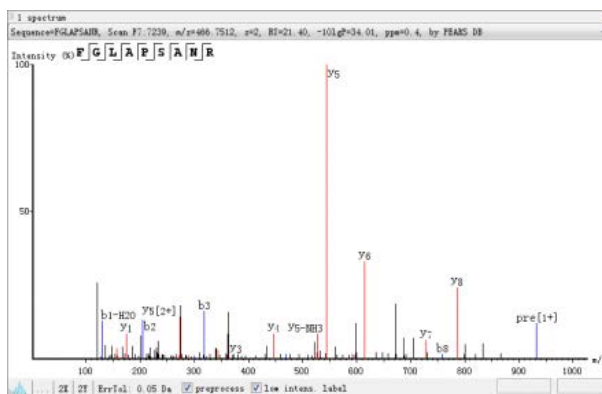



gi | 224117028

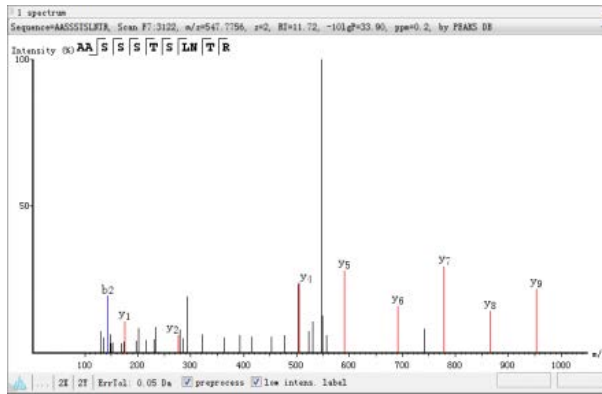

gi | 731428892

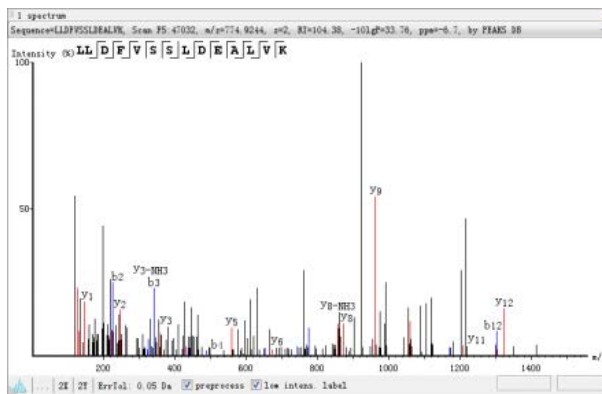

gi | 731396112

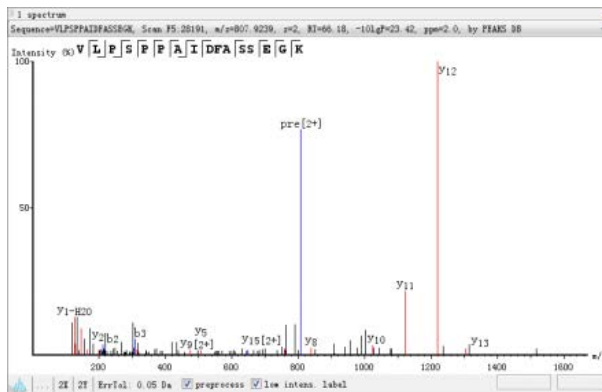

gi | 566164165

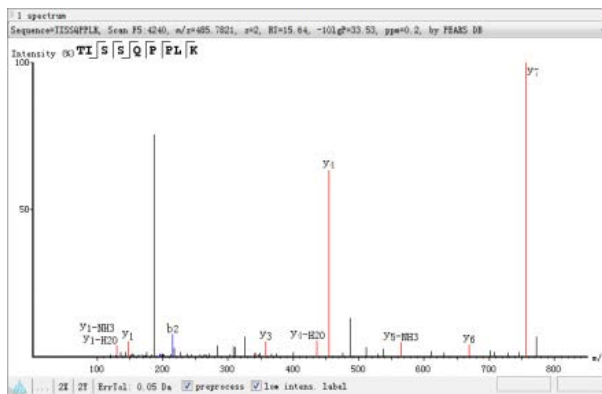

gi | 225434205

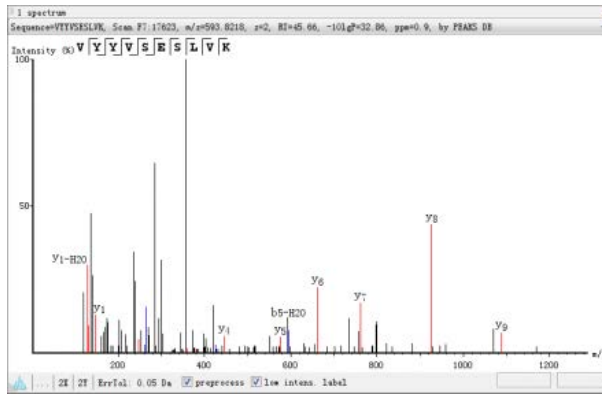

gi | 566209622

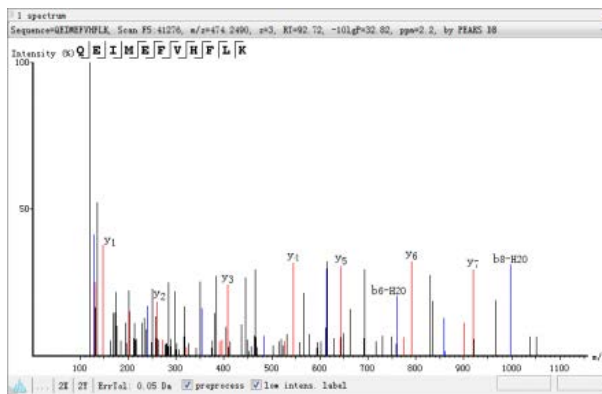

gi | 566202105

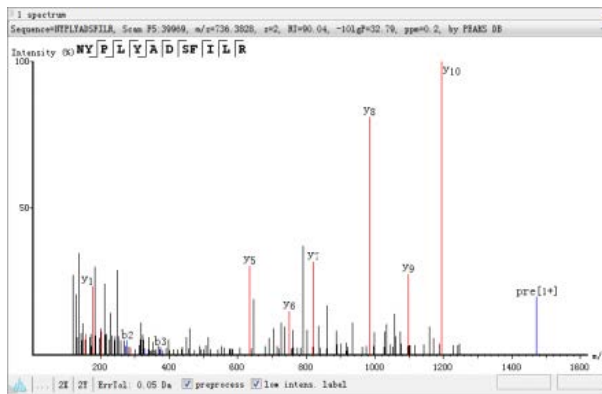

gi | 224102881

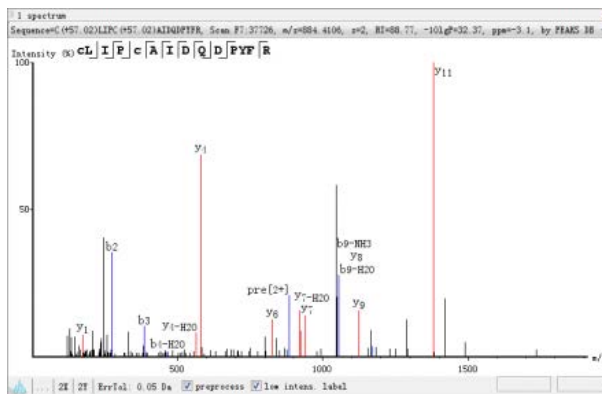

gi | 225438579

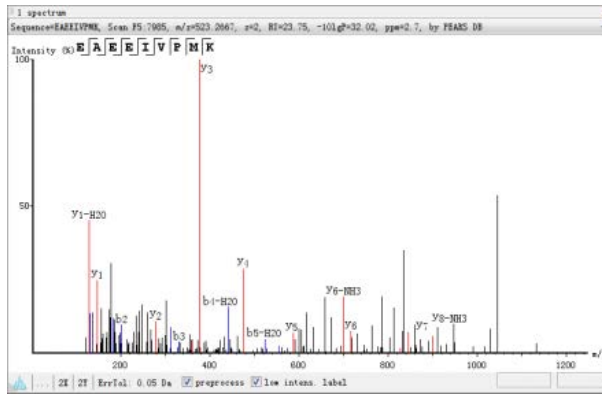

gi | 224095855

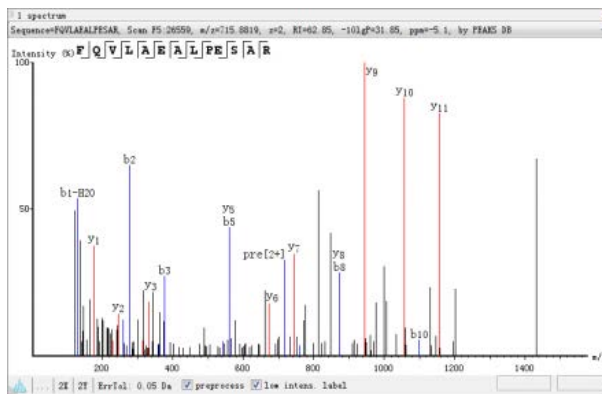

gi | 225439352

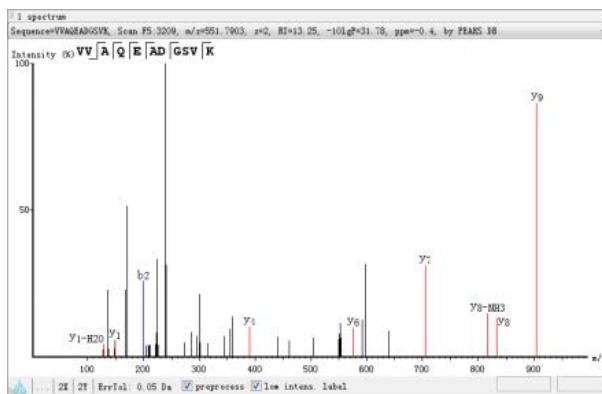

gi | 566188099

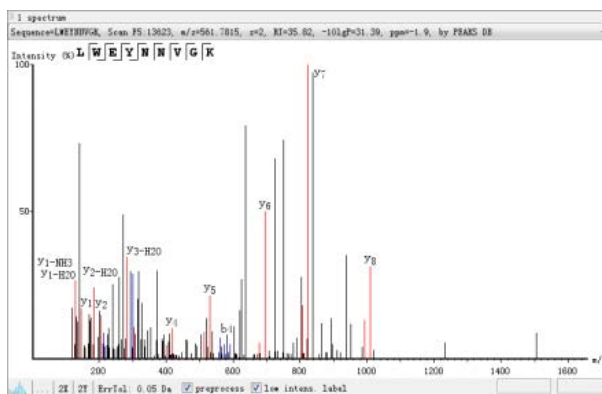

gi | 731417542

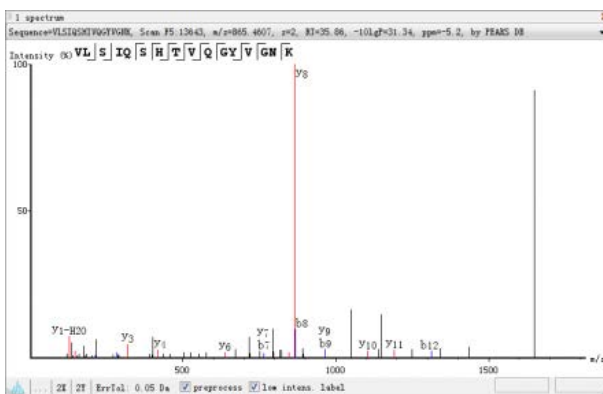

gi | 224077516

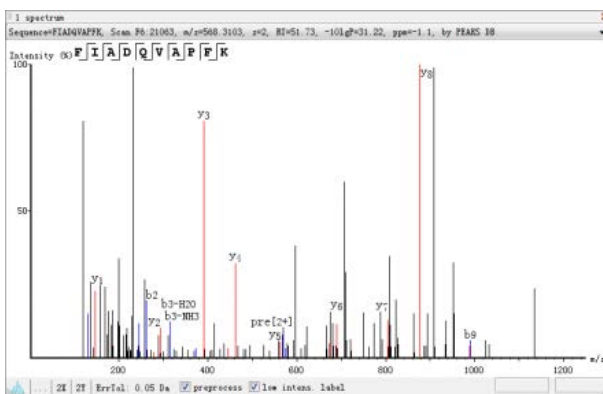

gi | 225464240

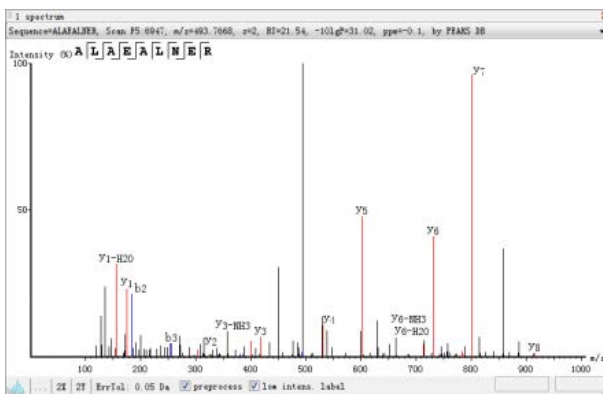

gi | 225448041

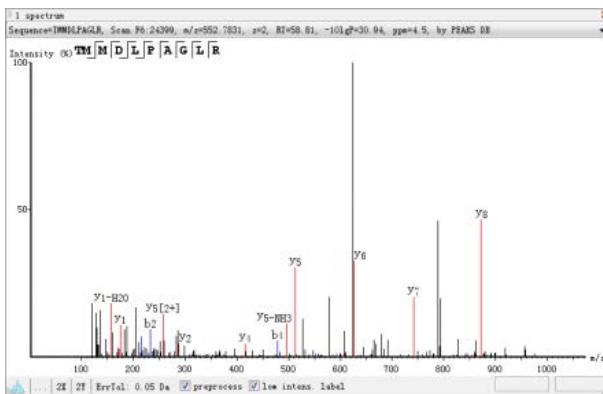

gi | 224100723

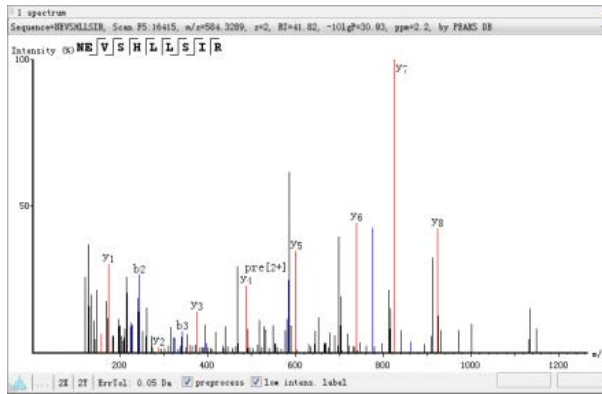

gi | 731423901

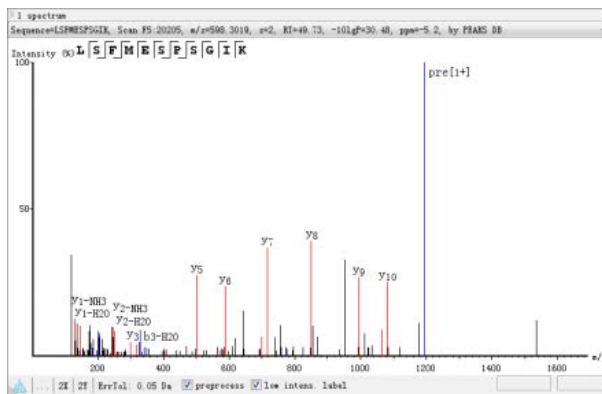

gi | 359487708

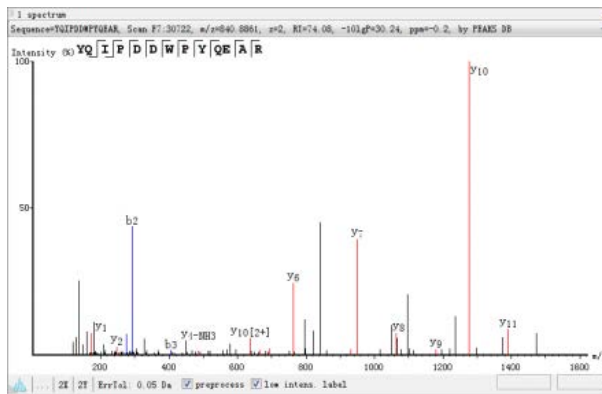

gi | 566146741

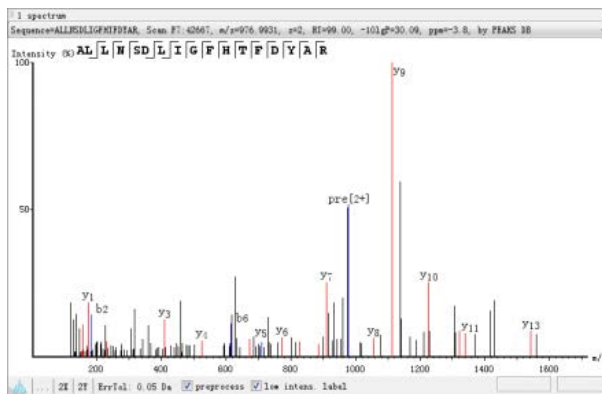



gi | 225423716

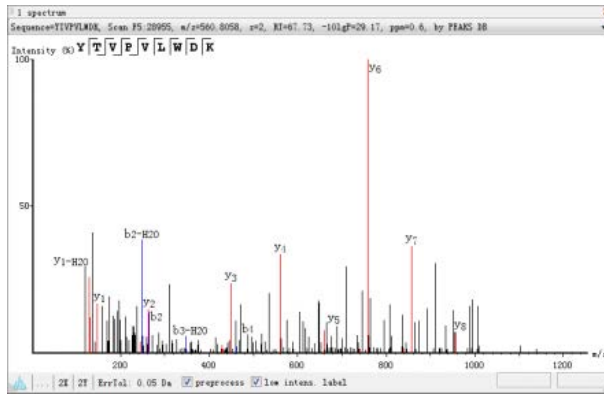

gi | 225454892

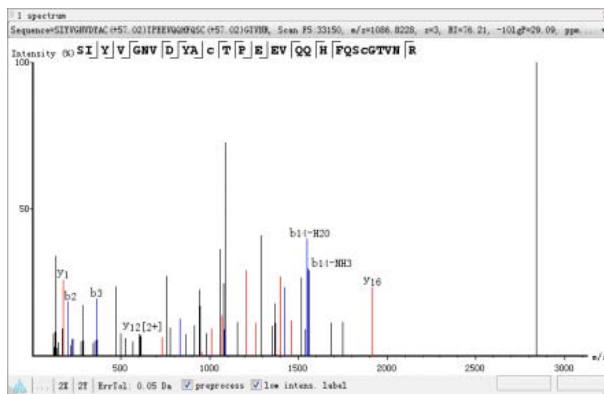

gi | 225454791

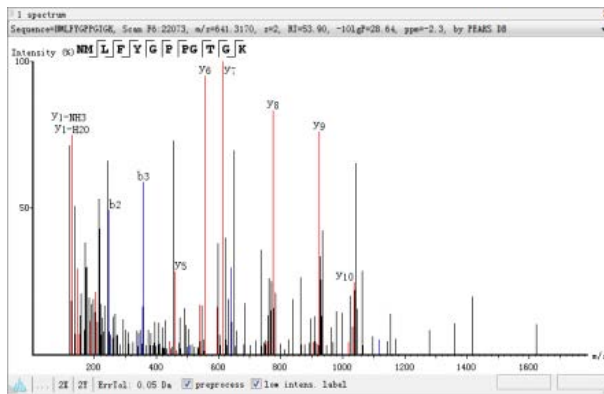

gi | 225433514

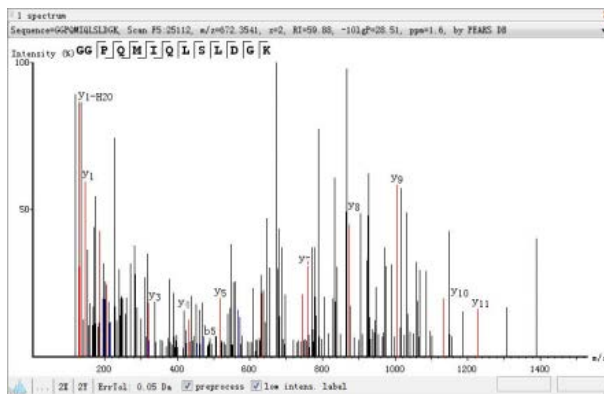

gi | 731440611

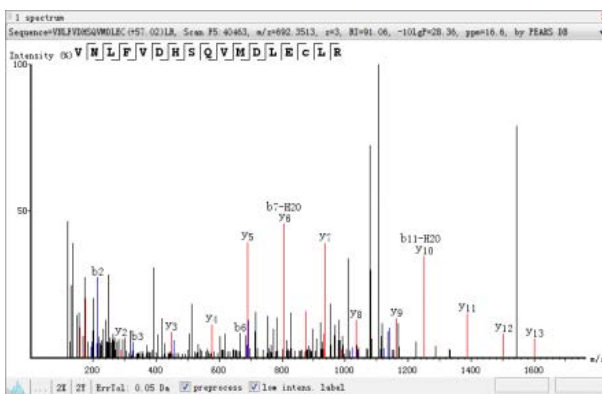

gi | 359482034

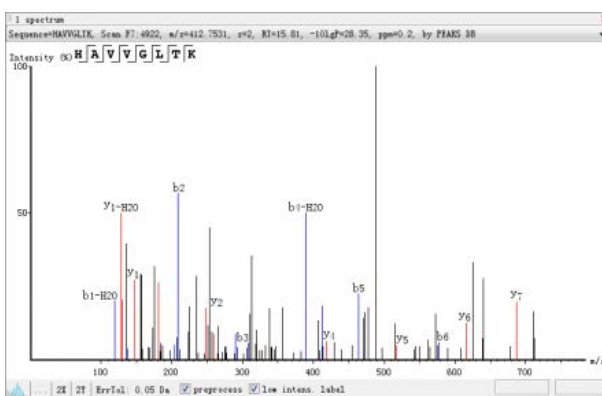

gi | 566207206

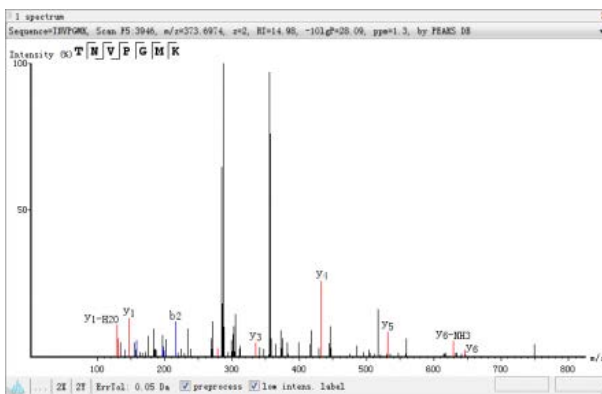

gi | 225452543

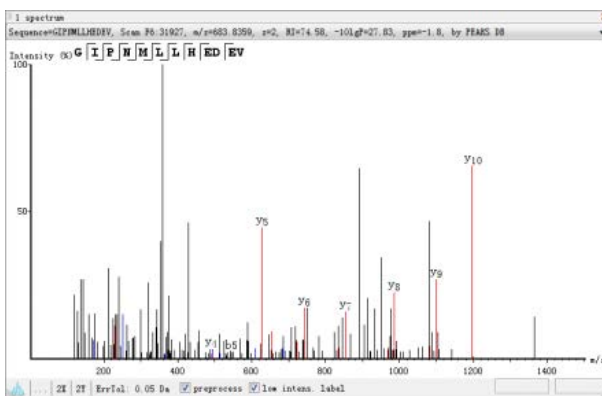



gi | 731408402

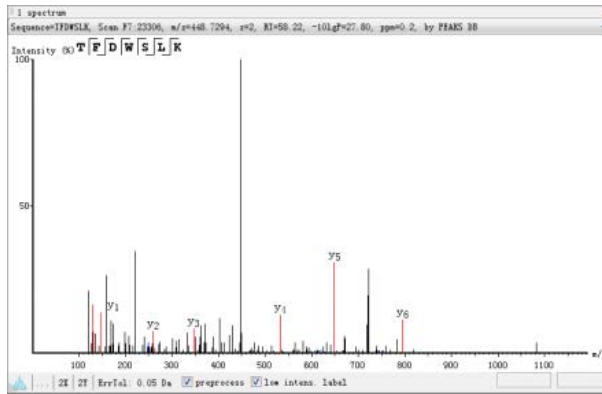

gi | 225433902

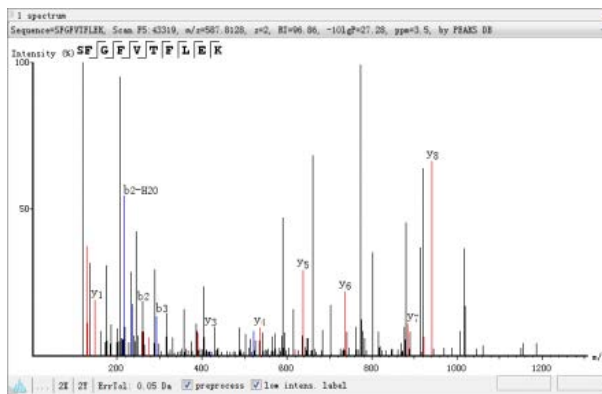

gi | 566152952

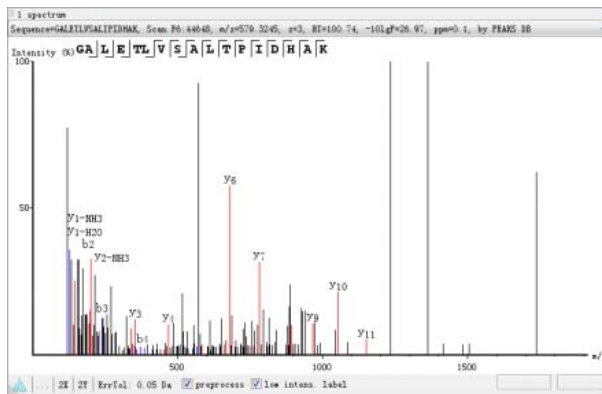

gi | 225435189

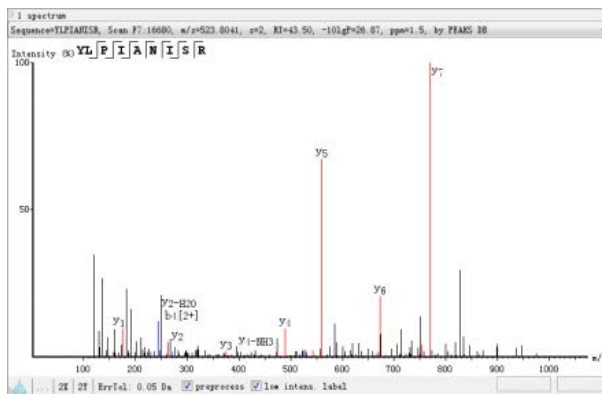

gi | 566197842

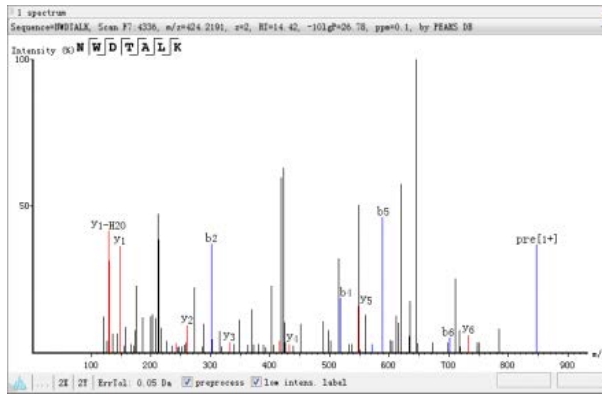

gi | 225468608

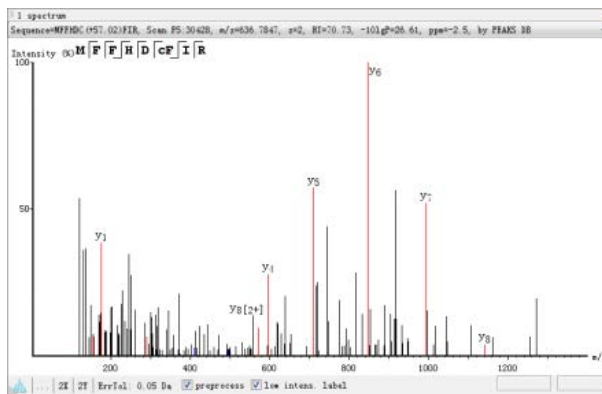

gi | 225457225

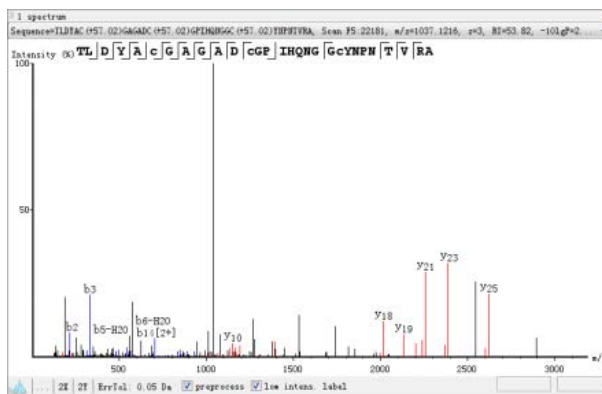

gi | 566190046

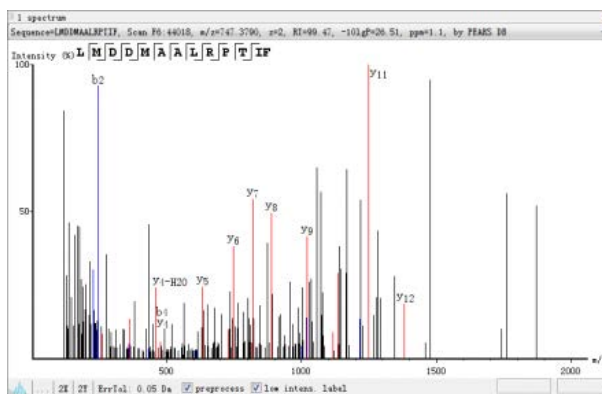

gi | 731393820

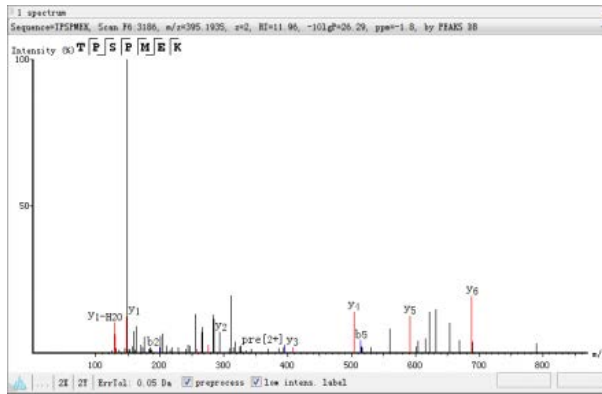

gi | 566198361

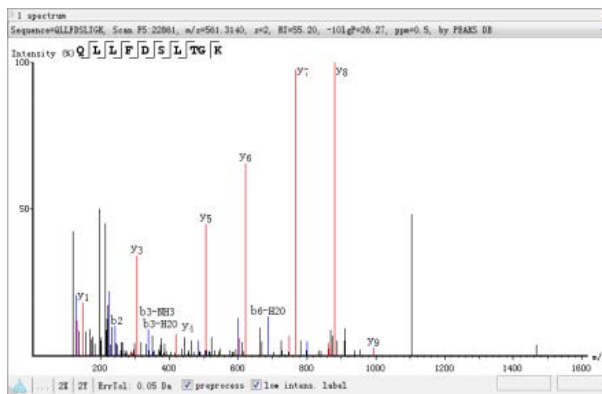

gi | 566148044

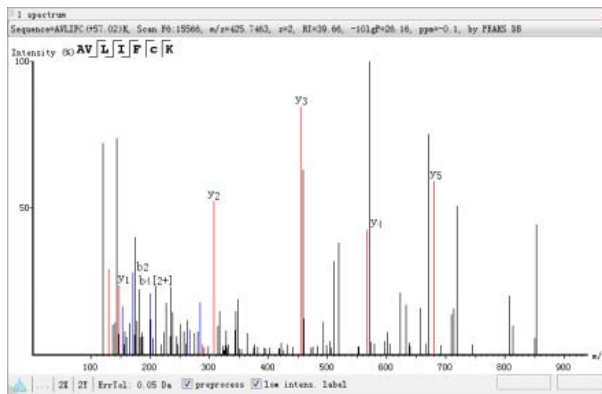

gi | 224088794

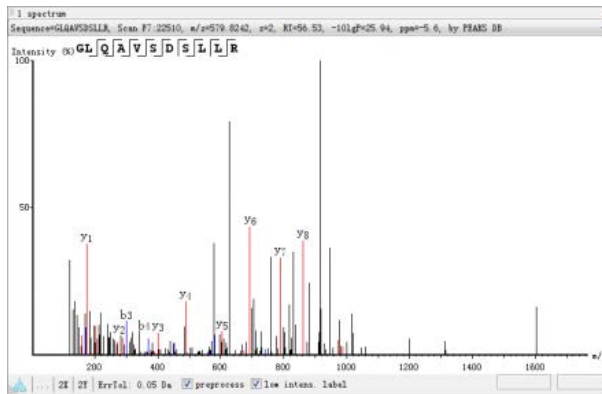

gi | 566153219

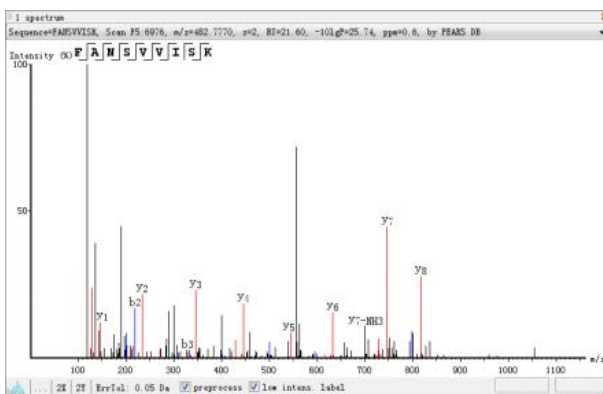

gi | 225456165

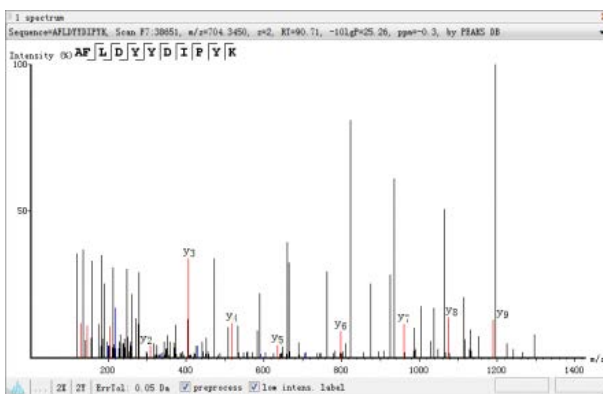

gi | 224101571

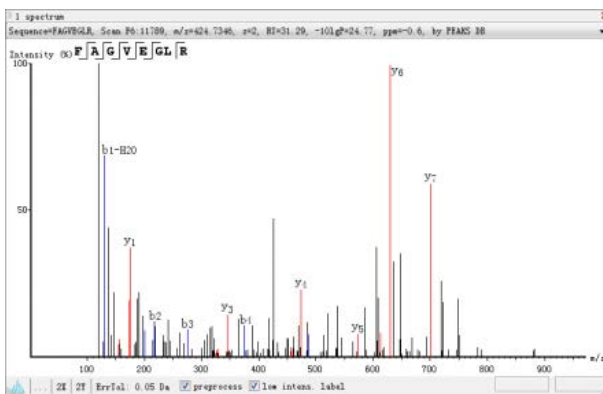

gi | 225427112

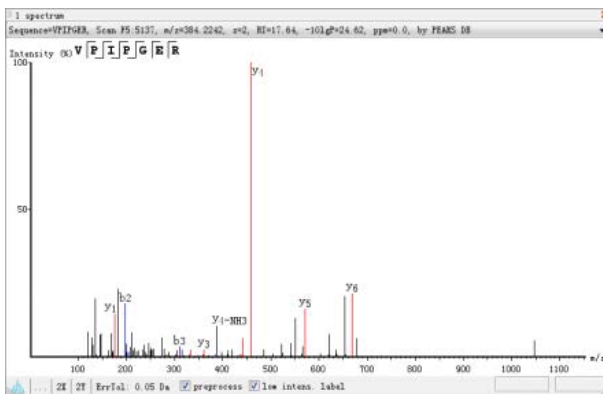

gi | 224057220

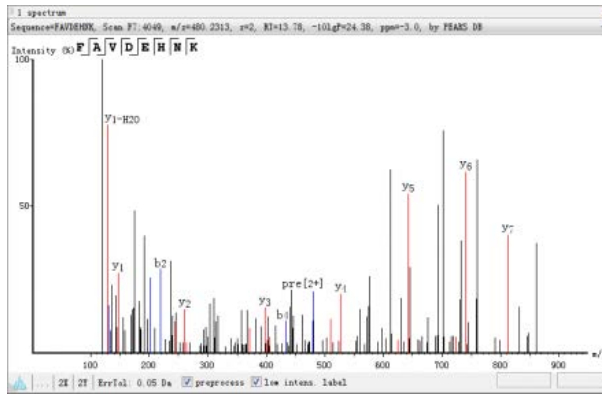

gi | 731413580

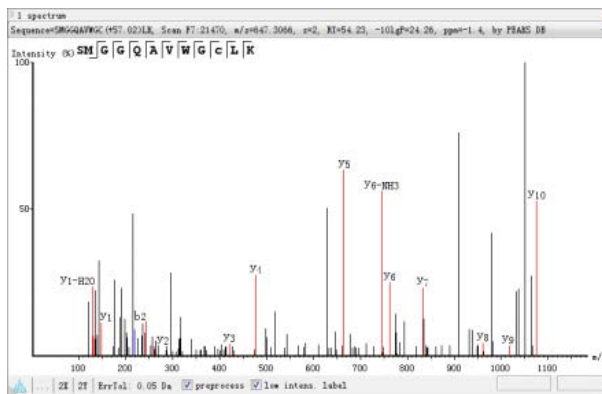

gi | 225442791

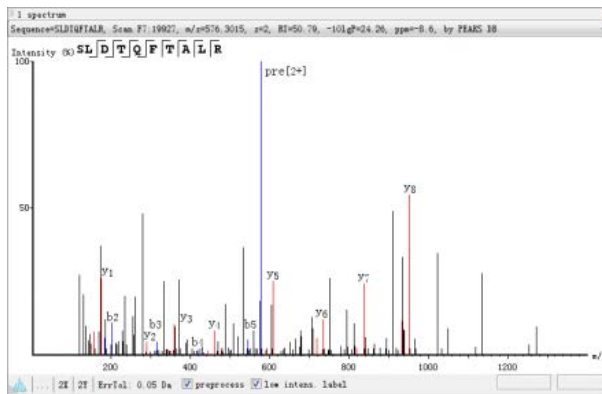

gi | 225437318

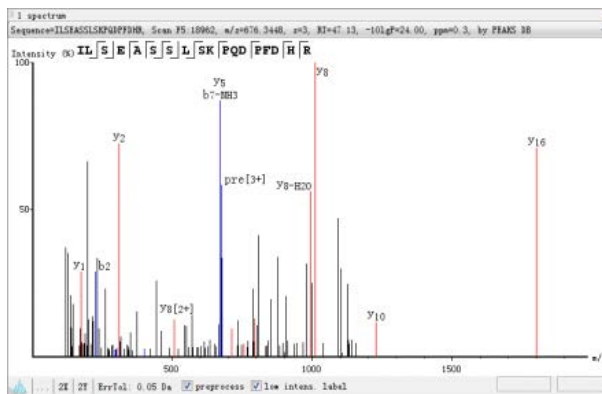

gi | 225440807

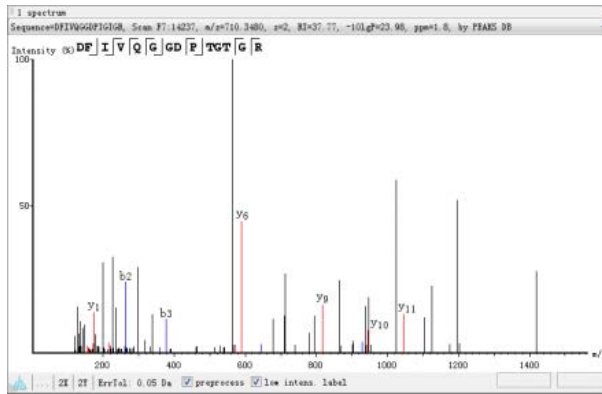

gi | 225447498

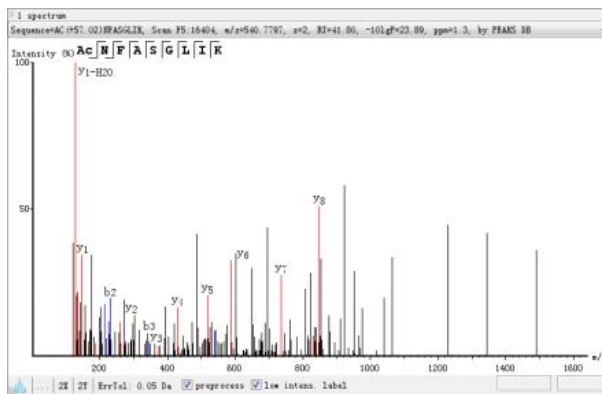

gi | 731425525

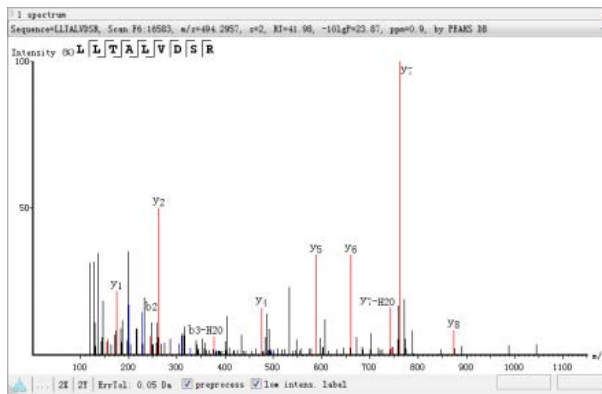

gi | 566185108

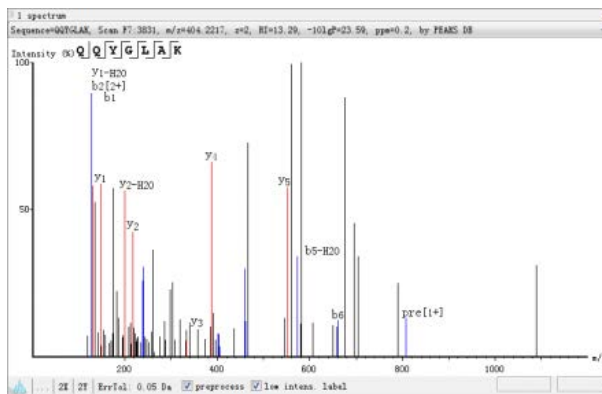

gi | 731423435

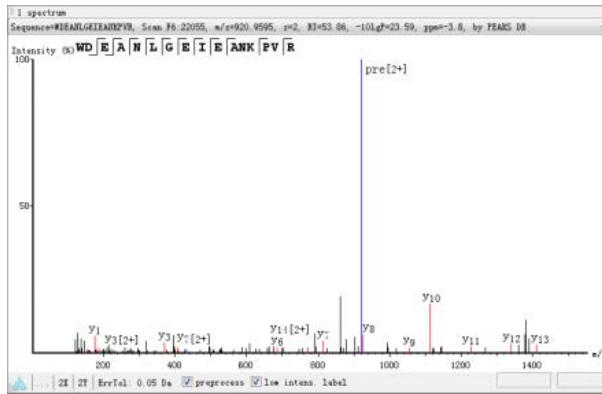

gi | 225451245

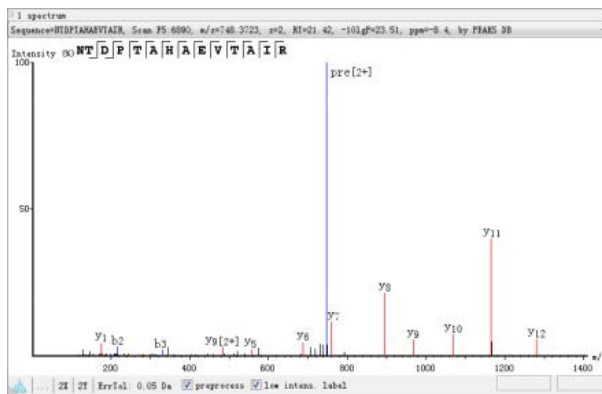

gi | 225458143

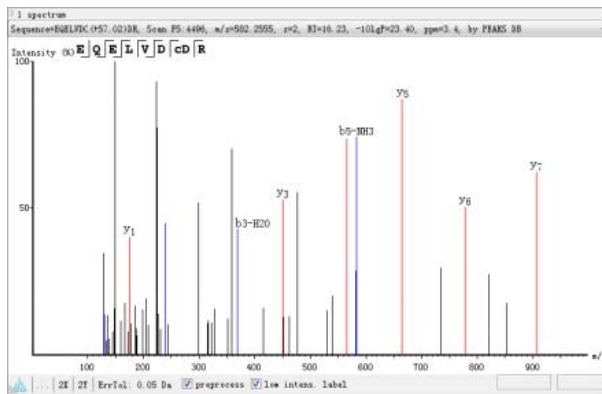

gi | 225440692

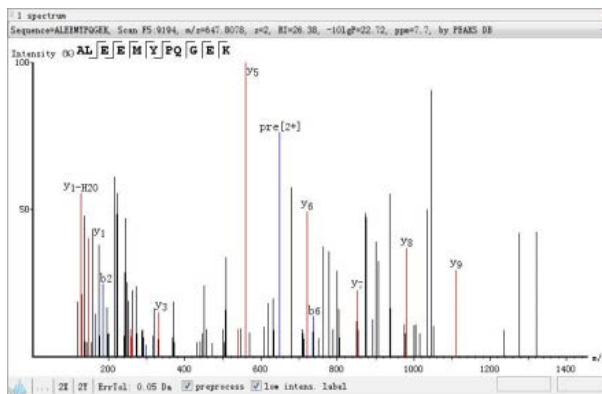

gi | 566166782

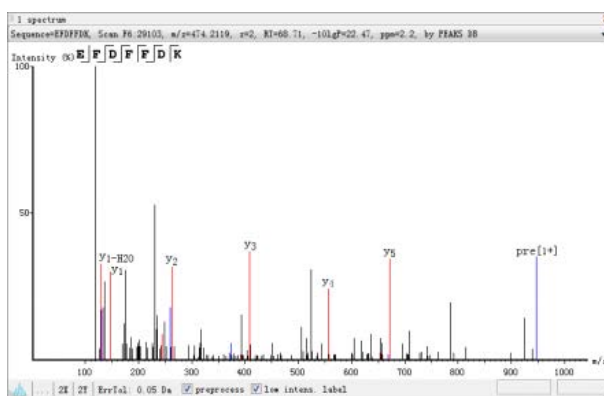

gi | 566187962

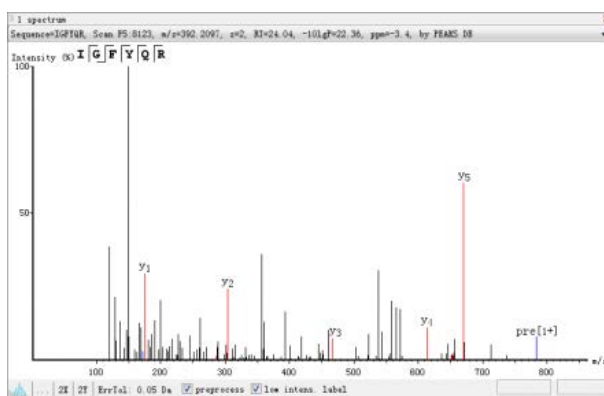

gi | 566188564

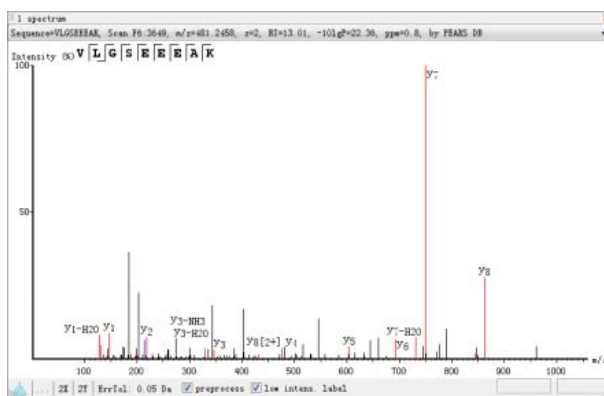

gi | 566195960

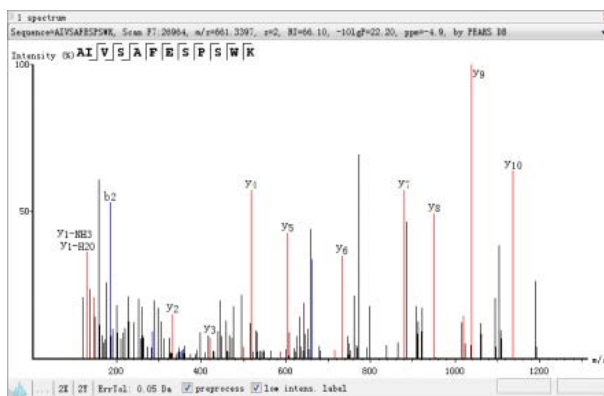



gi | 731384376

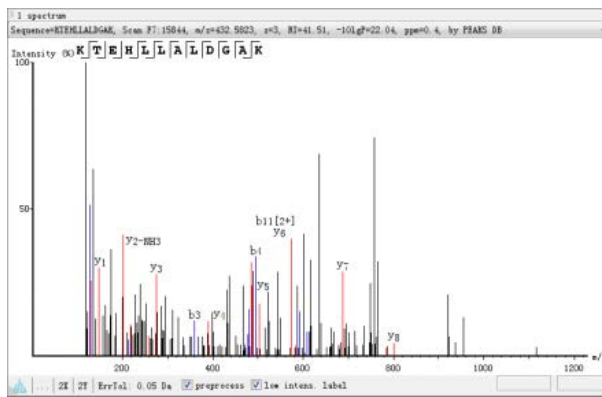

gi | 566180229

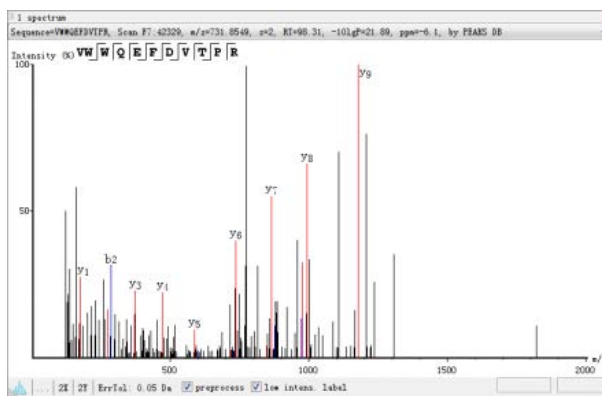

gi | 359473301

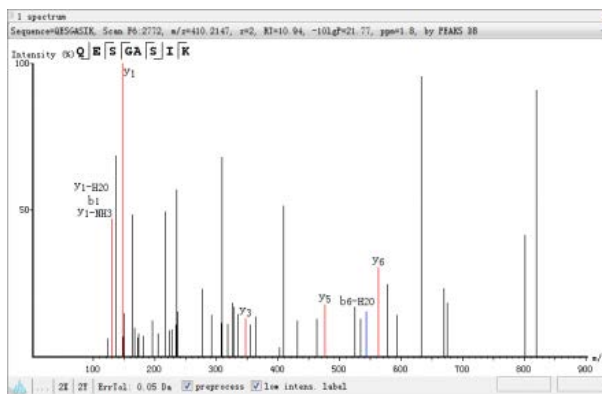

gi | 225430352

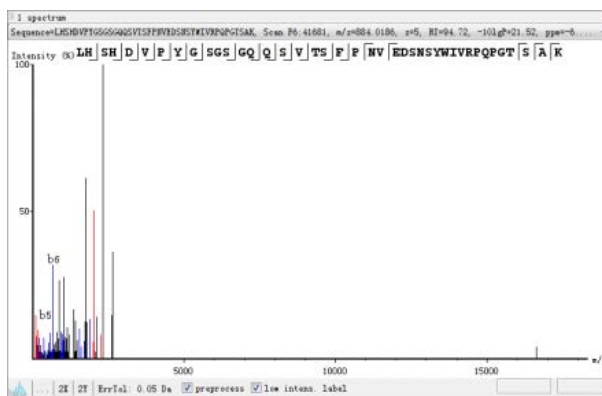

gi | 225449250

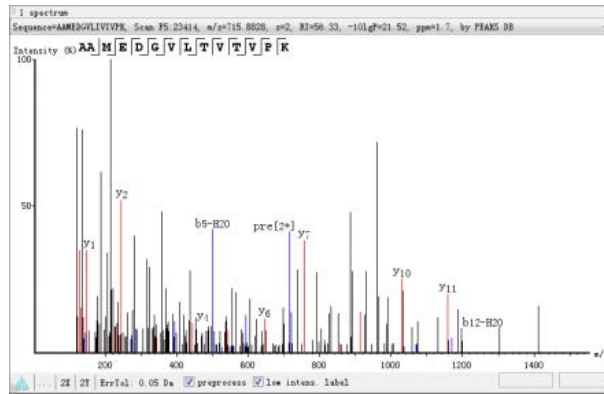

Fig.S5 The spectra of the proteins identified by one unique peptide with only one spectrum in HY2. Upper is the accession of protein, and under is its corresponding spectrum.

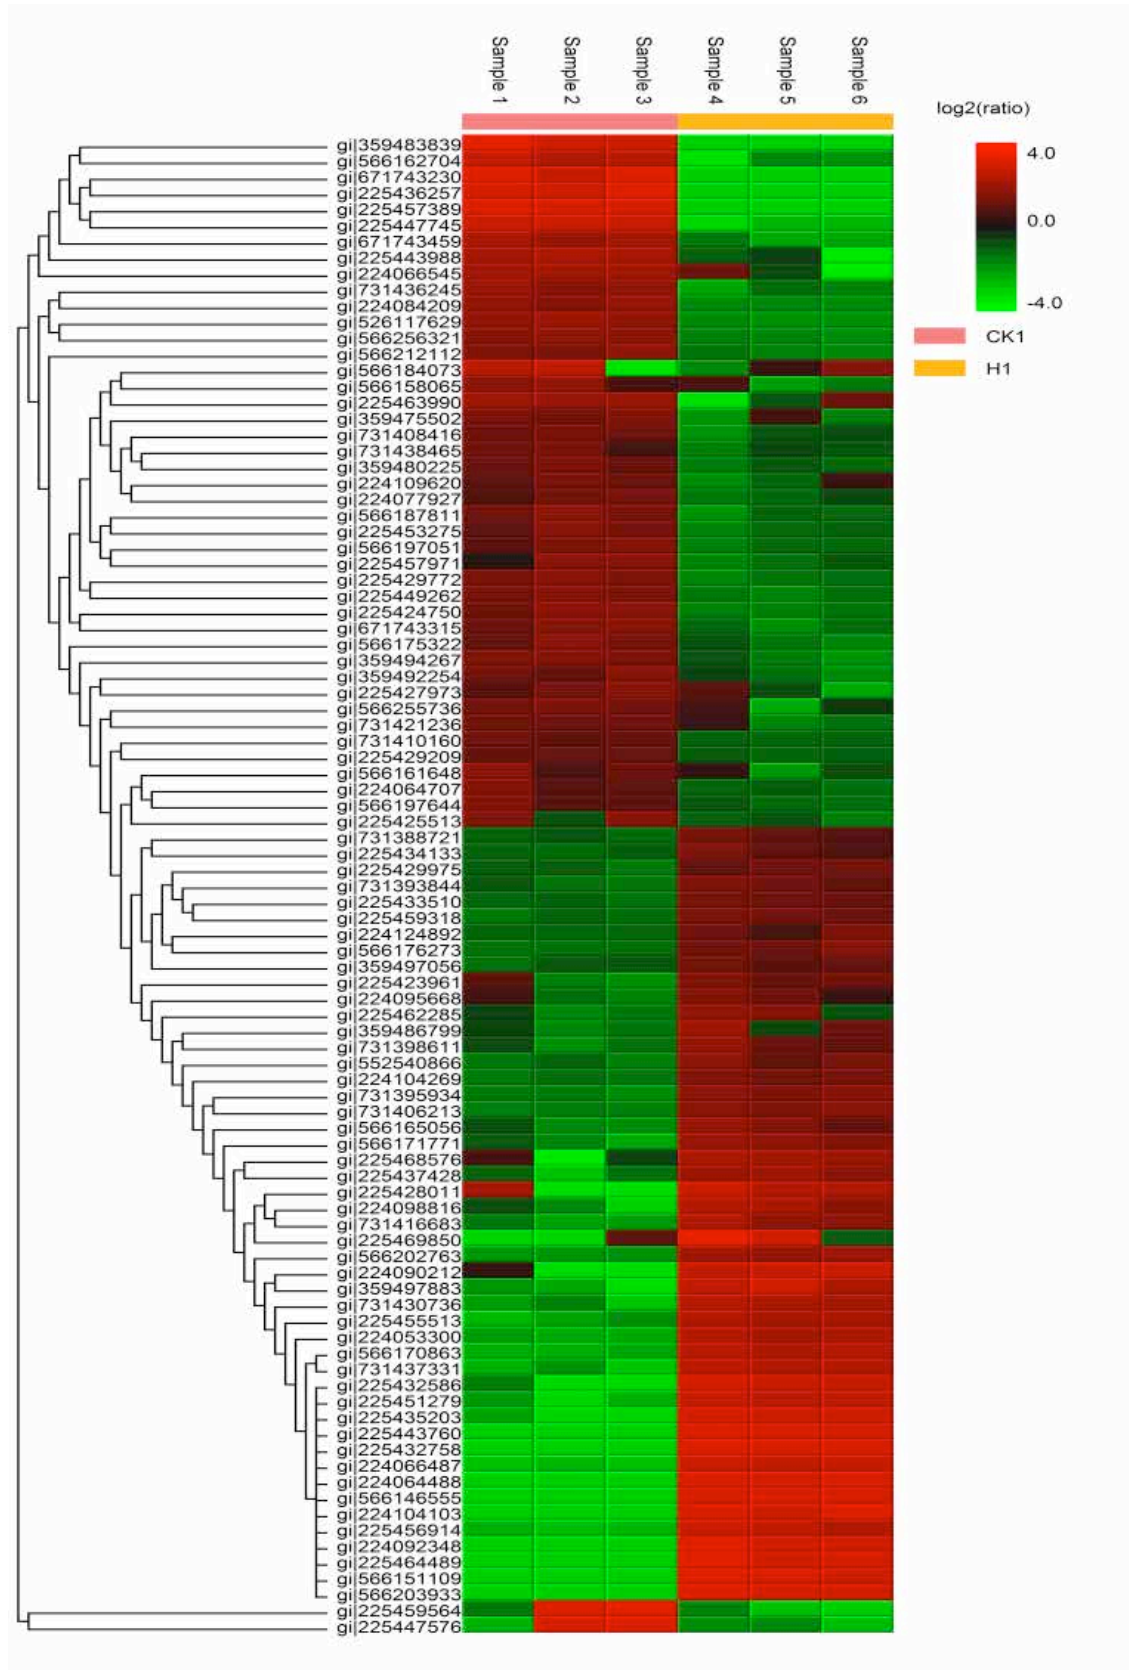

Fig. S6 Heat map of the differentially expressed proteins in the comparison of CK1 and HY1. Top, sample; left, protein tree. The color scale bar in the right indicates increased (red) and decreased (green) levels.

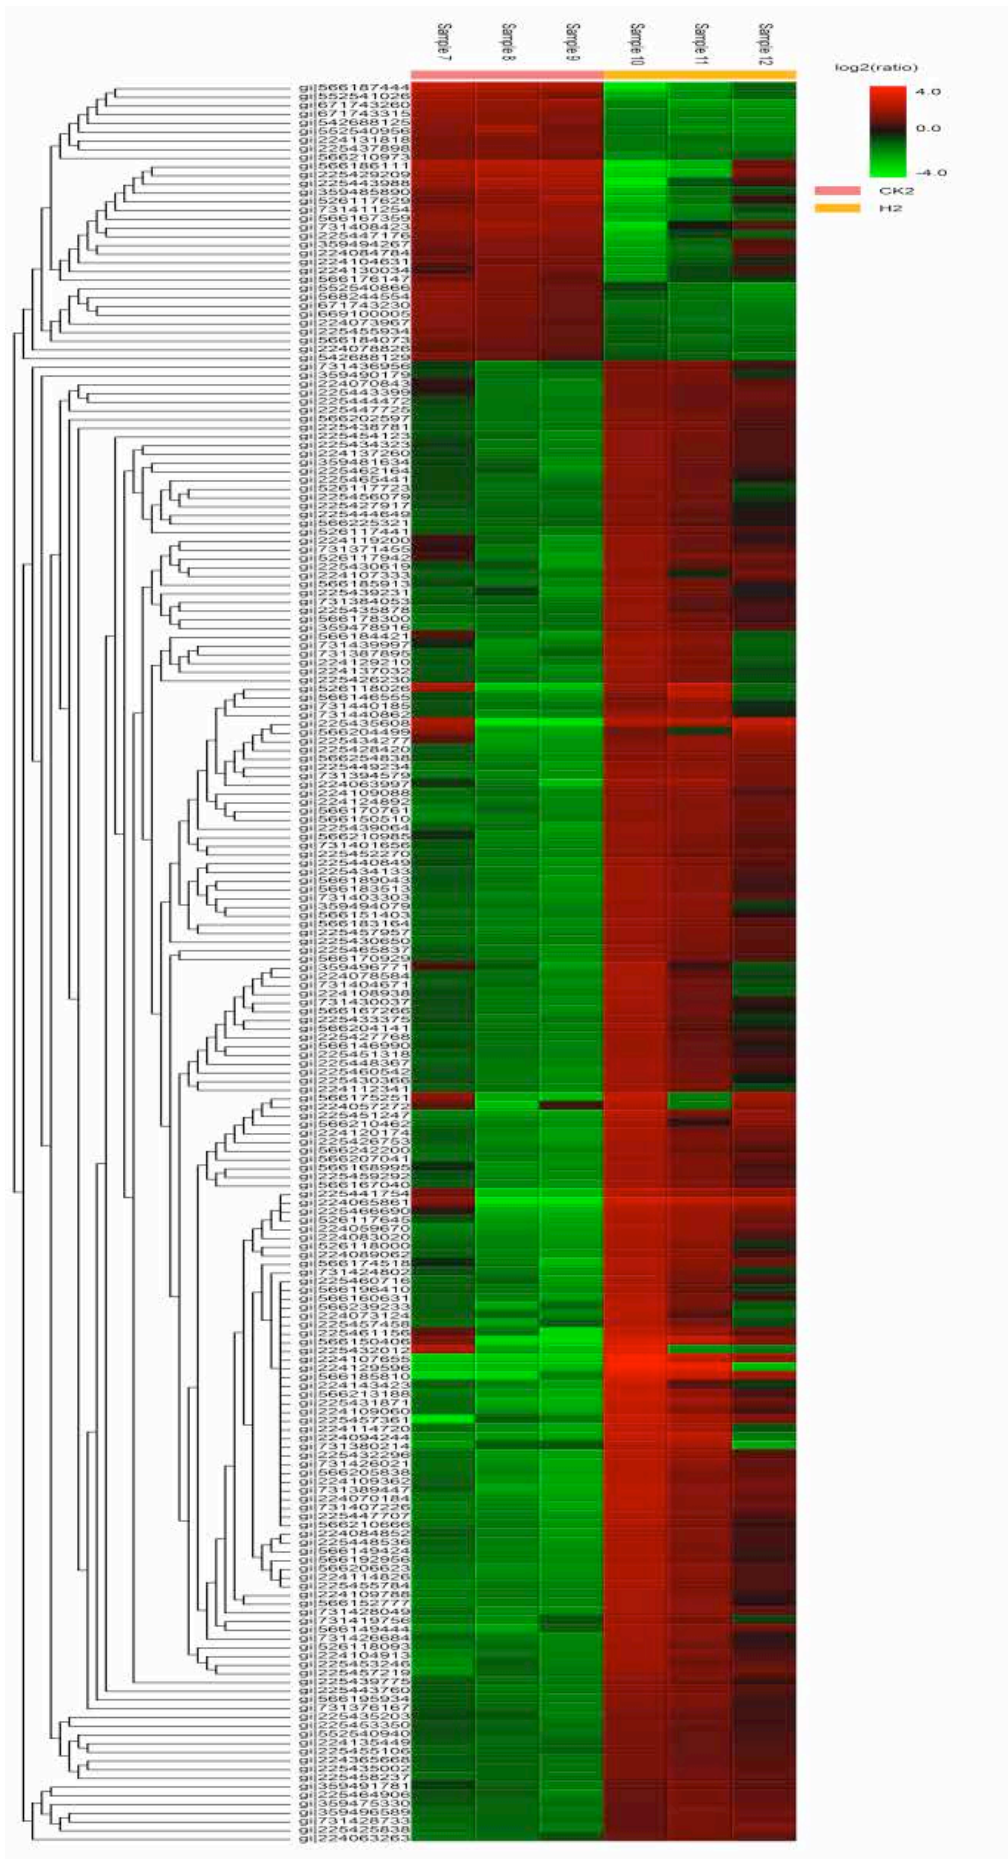

Fig. S7 Heat map of the differentially expressed proteins in the comparison of CK2 and HY2. Top, sample; left, protein tree. The color scale bar in the right indicates increased (red) and decreased (green) levels.

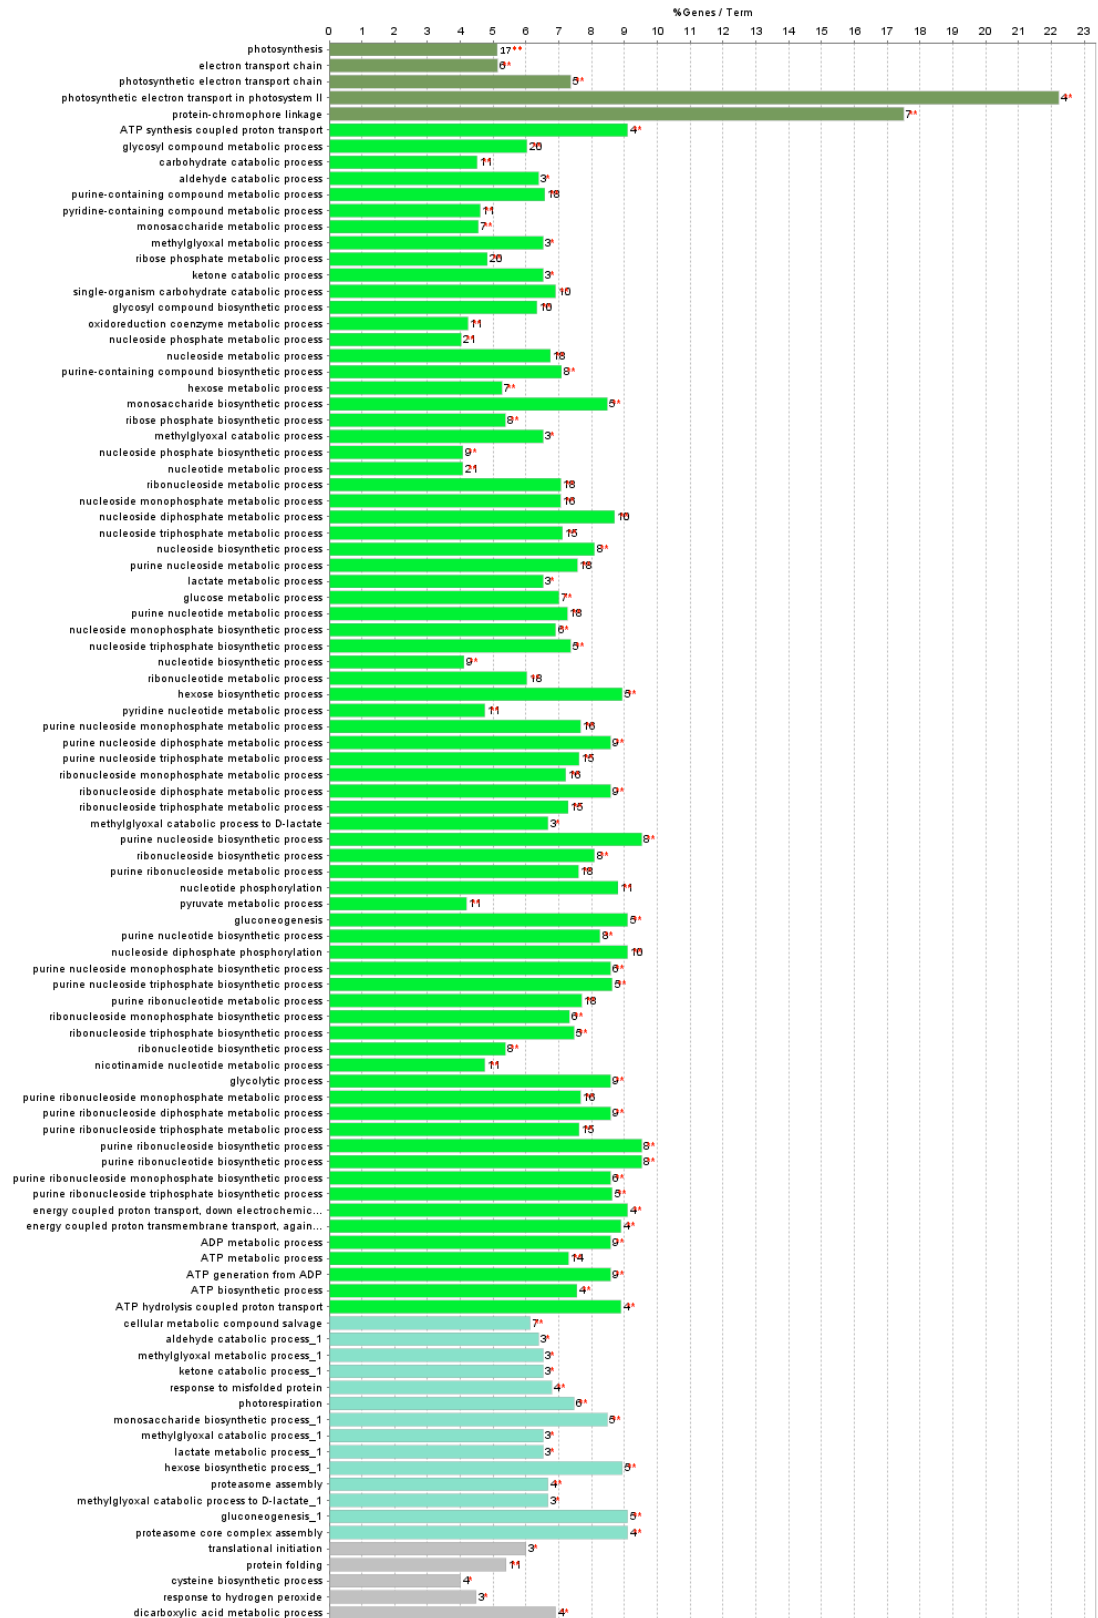

Fig. S8 Enriched GO terms of differentially expressed proteins identified from the comparison of HY2 and CK2.
